# Supplementary material
Source: PubMed Central journal article supplement (PMC8193836)

## Section 1: General information

### Materials sources:

All reagents for chemistry steps were obtained from Sigma or Acros. SuperFi DNA polymerase (Invitrogen), 2'-deoxyribonucleoside triphosphates (dNTP, set of dATP, dTTP, dGTP, dCTP, New England Biolabs), and T4 DNA ligase (New England Biolabs), were used as provided. Oligonucleotides (Integrated DNA Technologies) were obtained as desalted lyophilate and used without additional purification. Fmoc-Cys(STmp)-OH, Sulfo-Cy5-azide were obtained from Sigma. Sulfo-Cy5-DBCO and monoBromobimane (mBBr) were obtained from Lumiprobe and Thermofisher, respectively. Filter plates (MultiScreen Solvinert 0.45  $\mu$ m Hydrophobic PTFE) and BIS-Tris propane were purchased from EMD Millipore. 40% Acrylamide/Bis (19:1) was purchased from Bio-Rad.

**Note:** mBBr should be stored at -80°C in DMF. DMF or DMSO solutions of this dye lose efficiency over time. It is recommended to do titrations to find the optimal dye concentration for staining, if it was stored for an extended period.

### Buffers

- BIS-Tris propane ligation buffer (BTPLB): 50 mM NaCl, 10 mM MgCl<sub>2</sub>, 1 mM ATP, 0.02% Tween 20, 10 mM bis-tris, pH 7.6
- BIS-Tris propane wash buffer (BTPWB): 50 mM NaCl, 0.04% Tween 20, 10 mM bis-tris, pH 7.6
- BIS-Tris propane breaking buffer (BTPBB): 100 mM NaCl, 10 mM ethylenediaminetetraacetic acid, 1% SDS, 1% Tween 20, 10 mM bis-tris, pH 7.6
- Click reaction buffer (CRB): 50% DMSO, DI water, 1M triethylammonium acetate, 0.04% Tween 20, pH 7.4. Note: Mix DMSO and DI water (smells fishy) and then adjust pH (7.4) by addition of 1M TEAA buffer.
- 2X-PBS: 0.4 g/L KCl, 0.48 g/L KH<sub>2</sub>PO<sub>4</sub>, 16 g/L NaCl, 2.88 g/L Na<sub>2</sub>HPO<sub>4</sub> (anhydrous), pH 7.4.
- 2X-PBST: 2X-PBS, 0.2% Tween-20.
- Annealing buffer: 1 mM BTP, pH 7.6, 50 mM NaCl

Note: CRB was made fresh prior to each N3-hDNA click reaction

### Oligonucleotide sequences

| Name   | Sequence (5' - 3')                                                                                     |
|--------|--------------------------------------------------------------------------------------------------------|
| ABM062 | /5AmMC6/GTGGCACAACAACCTGGCGGGCAAAC                                                                     |
| ABM063 | GCCGCCAGTCCTGCTCGCTTCGCTAC                                                                             |
| ABM96  | CGCCAGGGTTTTCCAGTCACGACCAACCACCCAAACCACAAACCCAAACCC<br>CAAACCCAACACACAACAACAGCCGCCAGTCCTGCTCGCTTCGCTAC |
| ABM99  | GTGGCACAACAACCTG                                                                                       |
| ABM100 | CCTCTCTATGGGCAGTCGGTGATGTGGCACAACAACCTGGCGGGCAAAC                                                      |
| CES1   | GTTTTCCAGTCACGAC                                                                                       |
| U6-Rev | GACTATCATATGCTTACCGT                                                                                   |

|                             |                                                                                              |
|-----------------------------|----------------------------------------------------------------------------------------------|
| Frag_Fwd-1107[+]            | /5Phos/GCCGCCAGTCCTGCTCGCTTCGCTACATGGCAGAAGGA                                                |
| Frag_Fwd-1107[-]            | /5Phos/TGATCCTTCTGCCATGTAGCGAAGCGAGCAGGACTGGGCGGCGG                                          |
| Frag_2209/1306/2406/1506[+] | /5Phos/TCATTCTTCATGTTATAGAGCCCTACATTTCAATTCATAGAGCC                                          |
| Frag_2209/1306/2406/1506[-] | /5Phos/GCGGGCTCTATGAATTGAAATGTAGGGCTCTATAACATGAAGAA                                          |
| Frag_2604/1707/2802[+]      | /5Phos/CGCAACCCTACGTACAGAAGGATGGAACCTCAATCTAAGAGGCA                                          |
| Frag_2604/1707/2802[-]      | /5Phos/CTTTGCCTCTTAGATTGAGGTTCCATCCTTCTGTACGTAGGGTT                                          |
| Frag_1901/2A01/Rev[+]       | /5Phos/AAGCCTCCTAAGCCTGTTTGCCCGCCAGTTGTTGTGCCAC                                              |
| Frag_1901/2A01/Rev[-]       | /5Phos/GTGGCACAACAACCTGGCGGGCAAACAGGCTTAGGAGG                                                |
| ABM99_2A07-Rev              | GTGGCACAACAACCTGGCGGGCAAACAGGCCCGGAGGGCTT                                                    |
| P5_Univ_Fwd-2               | AATGATACGGCGACCACCGAGATCTACACTCTTCCCTACACGACGCTCTTCCGATCTNNNNNNNNNGCCGCCAGTCCTGCTCGCTTCGCTAC |
| Illumina Index 1            | CAAGCAGAAGACGGCATAACGAGATCGTGATGTGACTGGAGTTCAGACGTGTGCTCTTCCGATCTGTGGCACAACAACCTGGCGGGCAAAC  |
| Illumina Index 2            | CAAGCAGAAGACGGCATAACGAGATACATCGGTGACTGGAGTTCAGACGTGTGCTCTTCCGATCTGTGGCACAACAACCTGGCGGGCAAAC  |
| Illumina Index 3            | CAAGCAGAAGACGGCATAACGAGATGCCTAAGTGACTGGAGTTCAGACGTGTGCTCTTCCGATCTGTGGCACAACAACCTGGCGGGCAAAC  |
| Illumina Index 4            | CAAGCAGAAGACGGCATAACGAGATTGGTCAGTGACTGGAGTTCAGACGTGTGCTCTTCCGATCTGTGGCACAACAACCTGGCGGGCAAAC  |

## Section 2: Methods

### 2A: General solid phase synthesis protocol

Compounds were synthesized on TentaGel resin using general SPS protocol described below.

Linker-1, used for FACS studies and DEL synthesis, was synthesized on 10 µm TentaGel M NH<sub>2</sub> resin (Rapp-Polymere ,0.23 mmol/g). Linker-2, for mass analysis, was synthesized on 160 µm TentaGel MB RAM resin (0.41 mmol/g). TentaGel rink amide resin (160 µm, 0.41 mmol/g, 0.2 mmol, 50 mg, Rapp-Polymere) was transferred to a fritted spin-column (Mobicol Classic, large filter, 10 µm pore size) and swelled in DMF (1 h, RT). Fmoc was removed with 20% piperidine in DMF (3x resin volume after swelling, 500 µL) at RT for 10 minutes, twice. It was then washed thoroughly with DMF, DCM and DMF, and successively coupled with either amino acids or peptoid units. In general, acids (5 times of resin capacity, 1.0 mmol) were pre-activated at RT for 5 minutes with DIC/Oxyma/Collidine (1.4/1.0/1.0 mmol) in DMF, added to the resin, incubated at 37°C for one hour, and washed with DMF, DCM (5 times each, 5x resin volume). Fmoc was removed where applicable.



**Figure S1:** Linkers used in FACS and LCMS study

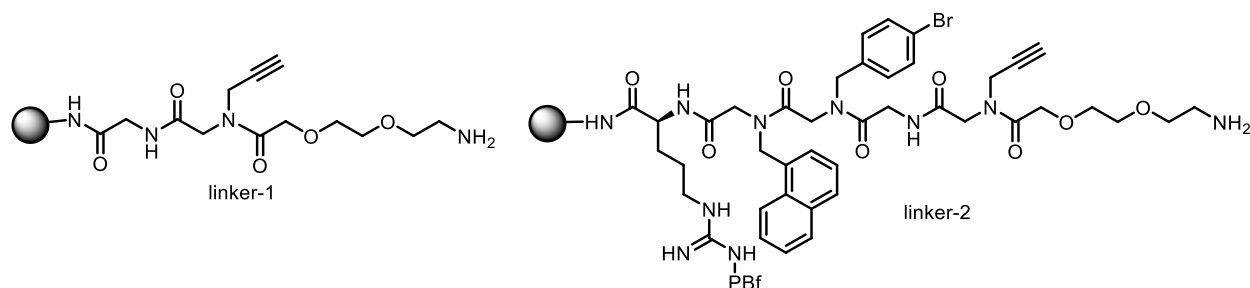

For peptoid units, bromoacetic acid (BAA) (1.0 M, DMF) and DIC (0.9 M) were added to the resin separately, vortexed, and incubated at 37°C for 1hr. Resin was washed thoroughly with DMF, DCM, and DMF and then sonicated in DMF for 2 minutes before further reactions. Amine (1.0 M, 1.5x resin volume, 500  $\mu$ L DMF) was added successively and incubated at 37°C for 3 hrs., with agitation. **Note:** Too concentrated BAA+DIC solution had incomplete addition. Longer reaction time (~1hr) with lower conc resulted better yield.

Linker-2 was synthesized upon addition of Fmoc-Arg(Pbf)-OH, BAA, 1-Naphthylmethyl amine, BAA, 4-bromobenzyl amine, Fmoc-Gly-OH, BAA, Propargyl amine, and Fmoc-EEAC, respectively, after swelling and Fmoc removal.

Linker-1 was synthesized upon addition of Fmoc-Gly-OH, BAA, Propargyl amine, and Fmoc-EEAC respectively.

## **2B: STMP group removal, cyclization and staining with mBBr.**

After synthesis of linear precursor was complete, resin was washed 3 times each with MeOH, DCM and DMF. Mixture of DTT and N-methylmorpholine base (100 mM each in DMF) was added (500  $\mu$ L for 50 mg, 10  $\mu$ m beads, 150  $\mu$ L for 0.5 mg of 10  $\mu$ m beads in plate), incubated for 5 min at RT, washed with DMF & DCM and repeated for two more times. Beads were washed 3 times each with DMF, 50% DMF-PBS and PBS buffer. It was suspended in PBST (pH = 7.6) and incubated at 37°C for 8-16 hrs. for cyclization. For large scale preparation N-Methylmorpholine (100 mM in DMF) was used for cyclization.

After desired time of cyclization, mBBr (150.0  $\mu$ L, 3.0 mM in DMF, 0.5 mg, 10  $\mu$ m bead) was added in filter plate (MultiScreen Solvinert 0.45  $\mu$ m Hydrophobic PTFE) and incubated at 37°C for one hour (9.0 mM, 2 hrs. when DNA tags are present). It was then washed with DMF, DCM, MeOH, suspended in PBST, and filtered into BD FACS tube for flow cytometry.

**Figure S2: Standard protocol for OBOC thioether macrocyclization**

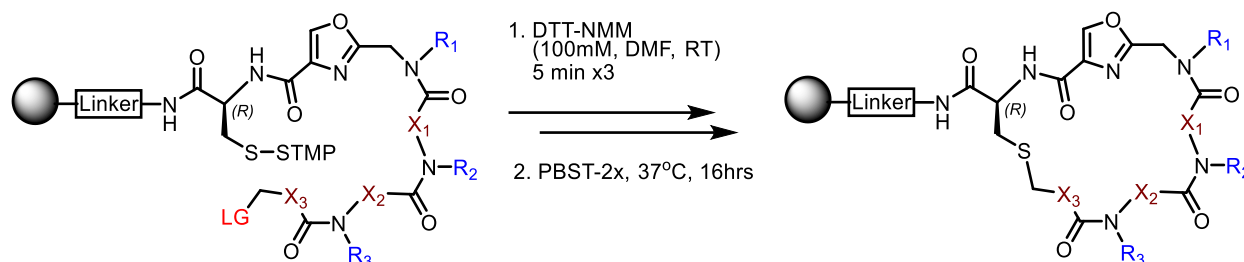

## **2C: Copper based click (CuAAC) reaction to attach Cy5-azide dye and headpiece-DNA.**

Cy5-azide dye was clicked to the alkyne in the linker region via CuAAC reaction before thiol deprotection, according to the Table **T2**. A similar procedure was followed for the azido-headpiece DNA (N3-hDNA).

In general, resin was suspended in freshly prepared CRB buffer (pH = 7.4) for one hour before the click reaction. CuSO<sub>4</sub>·5H<sub>2</sub>O (500 mM in water) and Tris[(1-benzyl-1H-1,2,3-triazol-4-yl)methyl]amine (TBTA, 50 mM in DMSO) were mixed in a 1:1 molar ratio, in CRB buffer, to obtain a blue colored solution. To this was added 50% of the required Na-ascorbate. The solution was then incubated for 5 min at 37°C to prepare the click-mix. A second solution containing the azide-click partner and the remaining Na-ascorbate was then added to the click-mix, vortexed, added to the resin, and incubated at 37°C for 2-4 hrs. After the reaction was complete, the resin was washed with organic solvent (DMF, DCM, MeOH), then extensively with aqueous buffer (BTP-WB & BTP-BB) and was suspended in BTP-BB (breaking buffer) overnight to remove copper salt before further reactions. BTP-BB solution turns blueish after overnight suspension.

For dye addition, DMSO solution of Cy5-N<sub>3</sub> was added (final conc 0.11mM) to the click-mix and incubated for 2 hrs. at 37°C.

Headpiece DNA was added to batches of 30.0 mg Linker-1 beads in 2.0 ml Bio-Rad spin column fitted with a 10 μm filter. The click-mix was prepared according to Table **T1**, then incubated at 37°C for 5 min before being added to the resin. A solution of N<sub>3</sub>-HDNA (3.0 mM, H<sub>2</sub>O, 0.008 equiv. of resin capacity) was then added to the click-mix, vortexed, and incubated for 4 hrs. at 37°C.

**Figure S3: General protocol to attach Cy5-azide dye and Azido headpiece DNA to the linker-alkyne**

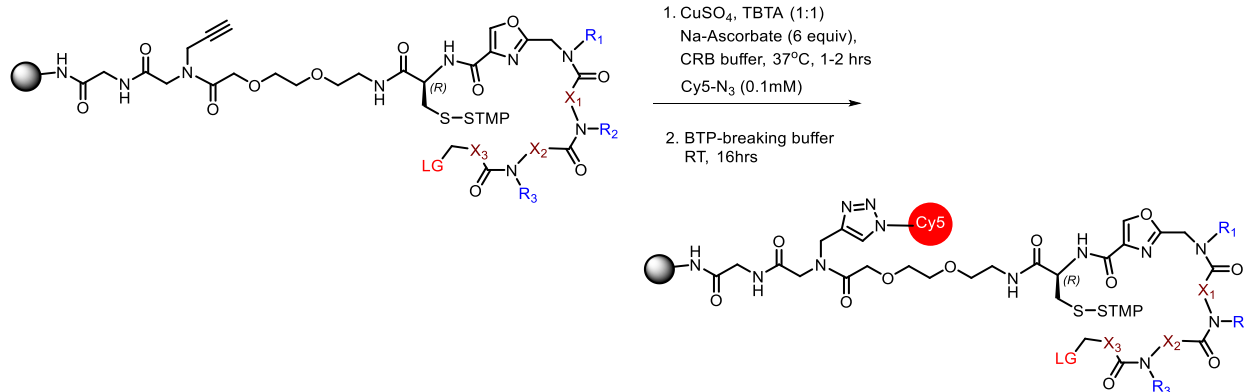

**Table T1: General protocol for coupling Azido-HDNA with linker-1 beads via CuAAC reaction.**

| Azido-HDNA addition                  |            |       |           |  |         |      |
|--------------------------------------|------------|-------|-----------|--|---------|------|
| Reagents                             | Stock (mM) | equiv | mmols     |  | amount  | unit |
| Beads (10 uM) ~ loading 0.23         |            |       | 0.0069    |  | 30.00   | mg   |
| CuSO <sub>4</sub> (H <sub>2</sub> O) | 500        | 1.000 | 0.0069    |  | 13.80   | ul   |
| TBTA (DMSO)                          | 50         | 1.000 | 0.0069    |  | 138.00  | ul   |
| Azido-peg-HDNA in TEAA buffer        | 3.1        | 0.008 | 0.0000552 |  | 17.81   | ul   |
| Na-Ascorbate (H <sub>2</sub> O)      | 500        | 6.000 | 0.0414    |  | 82.80   | ul   |
| CRB buffer                           |            |       |           |  | 1747.59 | ul   |
| Total rxn vol                        |            |       |           |  | 2000.00 | ul   |

**Table T2: General protocol for coupling Cy5-azide dye with linker beads via CuAAC reaction.**

| Cy5-N <sub>3</sub> dye addition      |            |       |          |         |        |      |
|--------------------------------------|------------|-------|----------|---------|--------|------|
| Reagents                             | Stock (mM) | equiv | mmols    | Cy5(mM) | amount | unit |
| Beads (10 uM) ~ loading 0.23         |            |       | 0.000115 |         | 0.50   | mg   |
| CuSO <sub>4</sub> (H <sub>2</sub> O) | 500        | 1.000 | 0.000115 |         | 0.23   | ul   |
| TBTA (DMSO)                          | 50         | 1.000 | 0.000115 |         | 2.30   | ul   |
| Cy5-N <sub>3</sub> (DMSO)            | 12         |       |          | 0.11    | 1.38   | ul   |
| Na-Ascorbate (H <sub>2</sub> O)      | 500        | 6.000 | 0.00069  |         | 1.38   | ul   |
| CRB buffer                           |            |       |          |         | 144.72 | ul   |
| Total rxn vol                        |            |       |          |         | 150.00 | ul   |

## 2D: General two-color staining protocol without a DNA tag

Cy5-azide dye was attached to the alkyne part of linear precursor via CuAAC reaction before thiol-protecting group was removed (Section 2C). Click-mix was prepared for total amount of resin according to Table T2, incubated at 37°C for 5 min, added to the resin (for filter plates, 150 µL, 0.5 mg/well) and incubated at 37°C for 2 hrs. Thiol-protecting STMP group was removed (Section 2B) using 100 mM DTT-NMM, washed, and solvent exchanged to PBST buffer for cyclization. Resin was washed with 2X-PBS and re-suspended in

2X-PBS buffer and DMF solution of mBBr (final conc. 3.0 mM, 150.0  $\mu$ L for 0.5mg, 10  $\mu$ m beads) was added. It was incubated at 37°C for one hour before washing with DMF, DCM and DMF.

This general protocol was applied for staining control molecules and 64 scaffolds in the absence of DNA tags. For DNA-tagged control compound **2** & **3**, Cy5-azide dye (0.11 mM final conc. added 2 hrs. after N<sub>3</sub>-HDNA addition) was clicked together with Azido-HDNA (0.002 equiv.), prior to thiol deprotection, at 37°C for 4 hrs. After thiol deprotection, the resin was transitioned to PBST, then a DMF solution of mBBr (final conc. 9.0 mM, PBST) was added and incubated for 2 hrs. at 37°C. It was then washed with MeOH, DCM and DMF.

For staining in the presence of DNA tags, please see Section 6.

**Figure S4: Two-color staining protocol without encoding DNA tags.**

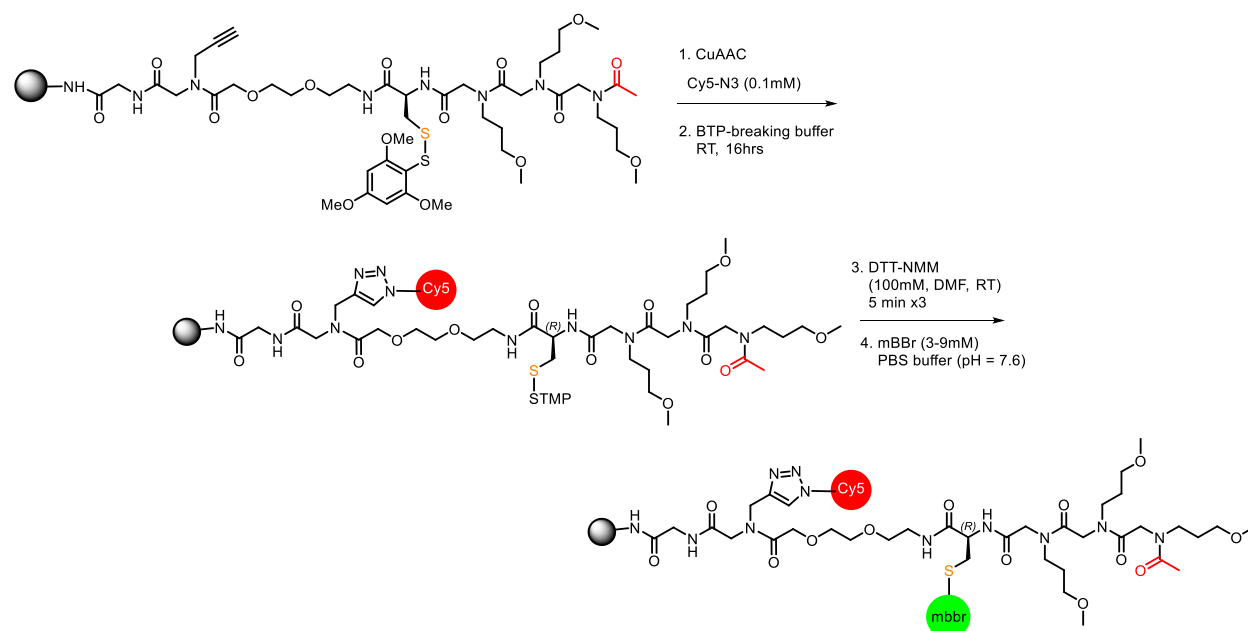

## 2E: DNA Ligations

DNA fragments are ordered as pairs of single-stranded DNA oligonucleotides, which are then annealed to form double-stranded fragments. The individual oligos are re-suspended at 1600  $\mu$ M, mixed at equimolar ratios to 800  $\mu$ M, then diluted to 80  $\mu$ M in annealing buffer before being denatured and annealed (95°C, 2 min., -0.1°C/s to 25°C). The annealed oligos are mostly complementary but do have small 5' or 3' overhangs to permit directional ligation. The DNA fragments with complementary overhangs are then ligated to build the DNA barcode. Final ligation reactions included: 1X BTPLB, each dsDNA encoding fragment at an equimolar ratio to bead-bound HDNA, 2  $\mu$ l T4 DNA ligase per mg of beads. Incubated at RT, with gentle agitation, 4 hours.

### Section 3: Two-color staining and fluorescence measurements of control compounds

**3A. Titration of Cy5-azide dye:** Control compound **3** (0.5 mg, 0.11  $\mu\text{mol}$ s, 10  $\mu\text{m}$  TentaGel M  $\text{NH}_2$  resin) was transferred to separate wells in a filter plate (MultiScreen SolvInert 0.45  $\mu\text{m}$  Hydrophobic PTFE) and suspended in CRB for one hour. Following general protocol described in section **2C**, click-mix solution was prepared in CRB according to Table **T2** and was added to each well ( $\sim 150 \mu\text{L}$ ). DMSO solution of Cy5-azide dye was added for final concentrations of (0.04 – 0.11 mM) and incubated for 2 hrs. at 37°C. Beads were washed, suspended in PBST, and filtered into BD FACS tube ( $\sim 20,000$  beads). Fluorescence intensity of these beads was measured (Red channel) to ensure it is under the linear range of flow cytometer. It appeared that the final Cy5 dye concentration of 0.11 mM is optimal and will be used in later studies.

**Figure S5: Cy5-dye titration with compound 3.**

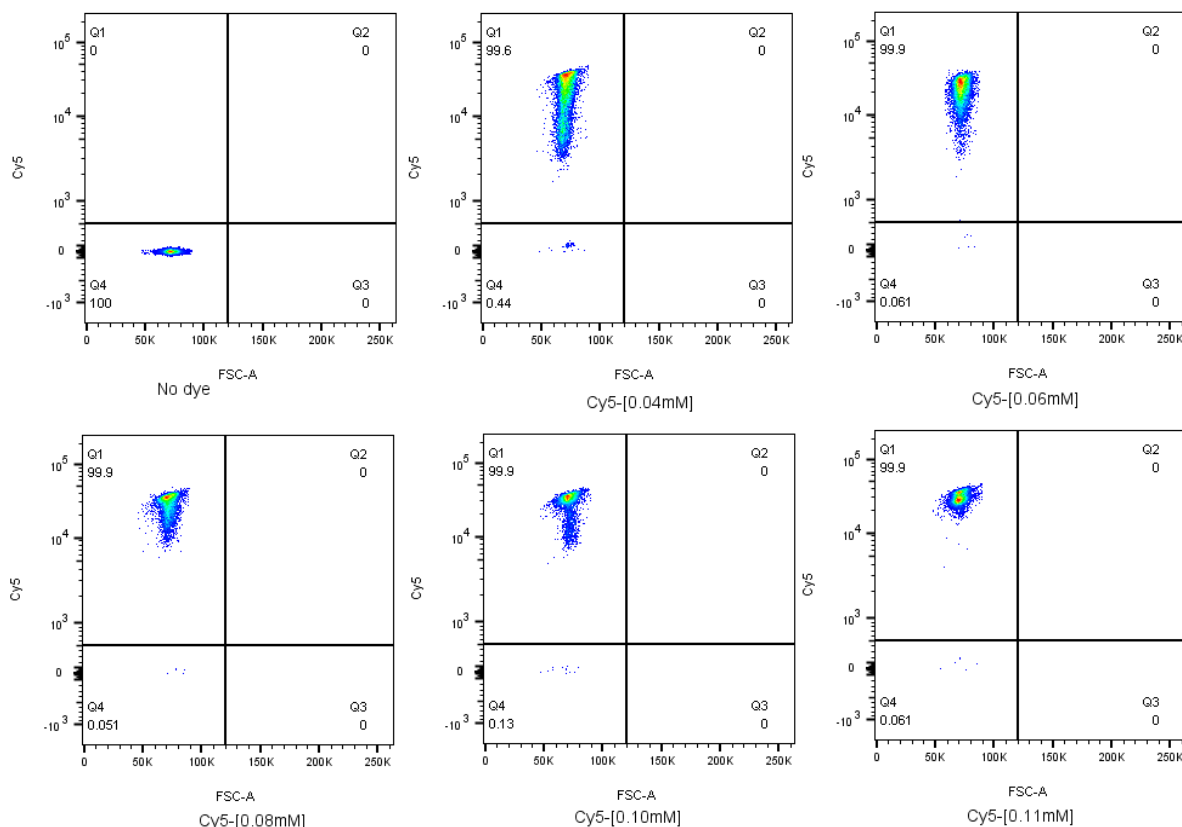

### 3B. Optimization of mBBr concentration

Resin displaying control compound **2** (0.5 mg, 0.11  $\mu\text{mol}$ s, 10  $\mu\text{m}$  TentaGel M  $\text{NH}_2$  resin) was transferred to separate wells in a filter plate. The thiol-protecting STmp group was removed (Section **2B**) and the resin was washed and transitioned to PBST (pH = 7.6). A solution of mBBr (23.0 mM, in DMF) dye was added

to each well for final concentrations of 1.0 – 7.0 mM. The plate was then incubated at 37°C for one hour. It was washed with DMF, DCM, MeOH, and DMF-PBST (50%) buffer, re-suspended in PBST and filtered into BD FACS tubes (~20,000 beads) for FACS analysis (BV510).

**Figure S6: Monobromobimane (mBBR) dye titration with compound 2.**

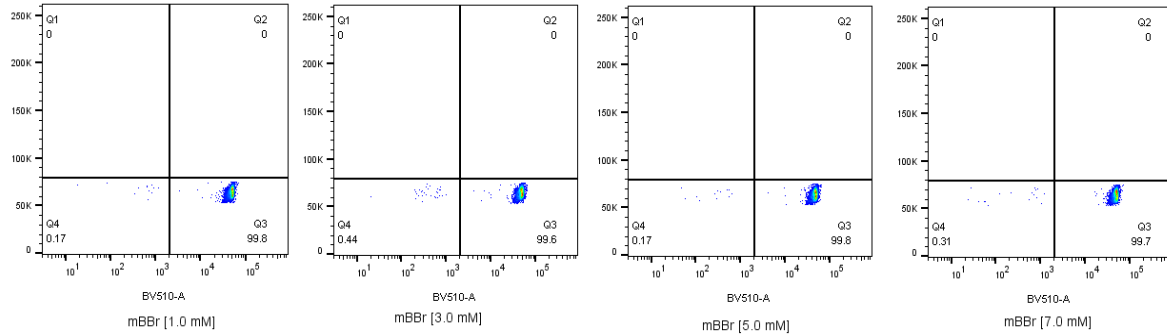

**Figure S7: Summary for staining compound 2 & 3 with Cy5, mBBR and FITC dyes**

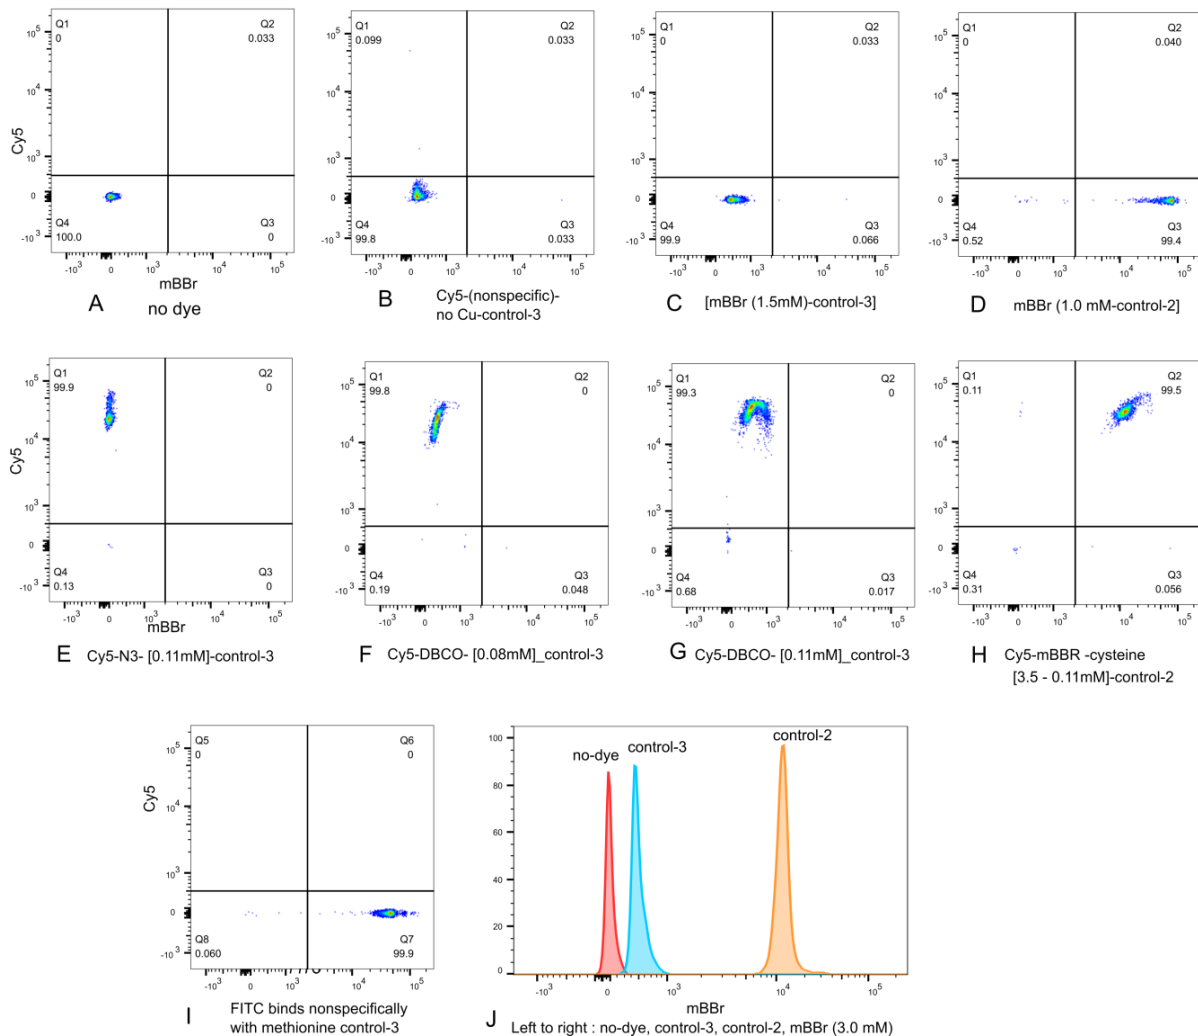

After staining with mBBr, control compound **2**, which represents a linear model, fluoresces brightly in the green channel while compound **3** (cyclic model) shows almost no fluorescence (Figure S7, Panel C vs D) indicating high specificity of mBBr with free thiols but not with thioethers. In contrast, compound **2** & **3** both fluoresce brightly after staining with Fluorescein-5-Maleimide (FITC, panel I) which indicates FITC binds to the beads nonspecifically and therefore cannot be used in this assay. The sulfo-CY5 dyes tested did not show non-specific binding to the resin.

For two color staining, resin displaying compound **2** was first stained with Cy5 dye, followed by thiol deprotection and staining with mBBr. In the presence of Cy5, a higher amount of mBBr (3.5 mM, Panel H) was required to achieve similar fluorescence intensity without the Cy5 dye, although fluorescence compensation was not required. Under identical staining conditions as with mBBr, compound **2** fluoresces 100-fold more than compound **3** (Panel J).

**Note:** It was observed that, for fresh mBBr, a lower concentration (1.0- 3.0 mM) is optimal. However, over time mBBr loses efficiency and titration should be repeated to find the optimal dye concentration.

#### Section 4: Cyclization progress of DDA scaffold via LCMS/FACS

Scaffold **DDA** was synthesized on both 10 (linker-1) & 160 (linker-2)  $\mu\text{m}$  beads separately in spin columns (10  $\mu\text{m}$  filter) after adding Fmoc-Cys-(STmp)-OH, 2-(Chloromethyl)oxazole-4-carboxylic acid (3x) and 3-(Chloromethyl)-benzoic acid respectively following the general SPS protocol (Section 2A). 3-methoxypropyl amine was used in all **X1-3** position (Figure S8A & B). After the linear precursor was synthesized, it was transferred to two separate filter plates (0.5 mg /well) and thiol protection was removed. Beads were washed with DMF, DCM, DMF-PBS (50%), and finally suspended in PBST.

Figure S8A: FACS analysis with 10  $\mu\text{m}$  beads

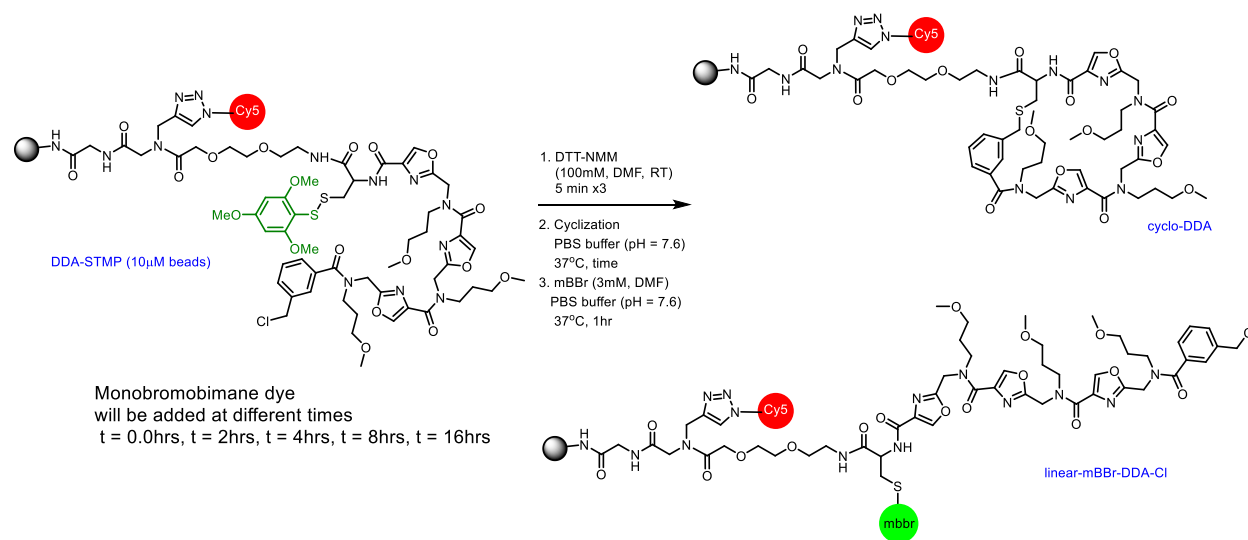

**Figure S8B: LCMS analysis with 160  $\mu\text{m}$  beads**

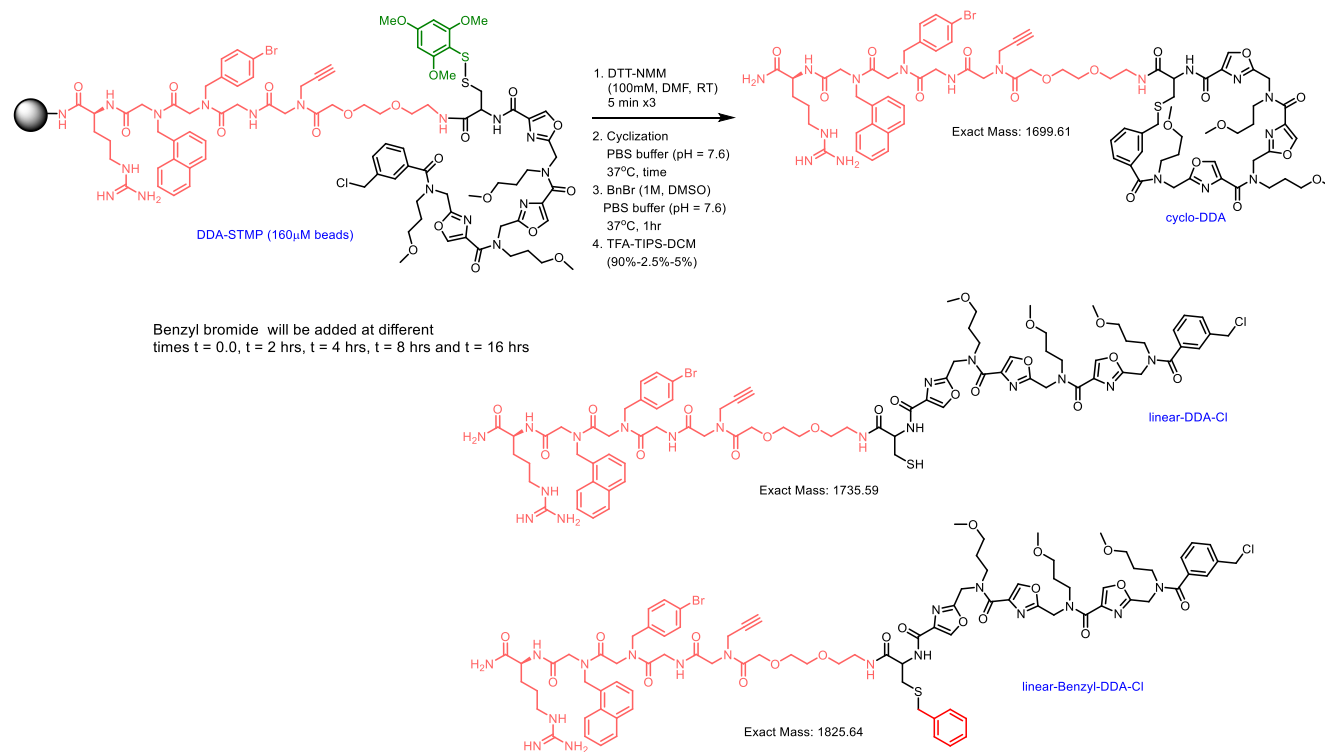

The ring closure process was monitored from point  $t = 0$ , onwards. After thiol exposure, mBBR (3.0 mM, 150  $\mu\text{L}$  for 0.5mg /0.1  $\mu\text{mol}$  of 10  $\mu\text{m}$  TentaGel resin) and benzyl bromide (1.0 M, 150  $\mu\text{L}$  for 0.5mg /0.2  $\mu\text{mol}$  of 160  $\mu\text{m}$  TentaGel resin) were added separately at  $t = 0, 2, 4, 6, 8$  & 16 hrs. and incubated at 37°C for one hour. After 16 hrs., the 160  $\mu\text{m}$  beads were TFA-cleaved (90% TFA, 2.5% TIPS, 2.5% thioanisole and 5% DCM, 2hrs, RT) and analyzed by LCMS, while 10  $\mu\text{m}$  beads were passed through a 35 $\mu\text{m}$  cells strainer and analyzed by FACS to measure fluorescence. As expected, at  $t = 0$  hrs., mostly benzylated linear material (Figure **S8B**, Mw 1825) was obtained, while at  $t = 16$  hrs., cyclo-**DDA** was obtained in major quantity. As cyclization progresses over time, absorbance for linear material (RT = 9.5 min) tend to diminish as expected.



At t = 0, major ion corresponds to benzylated linear material.

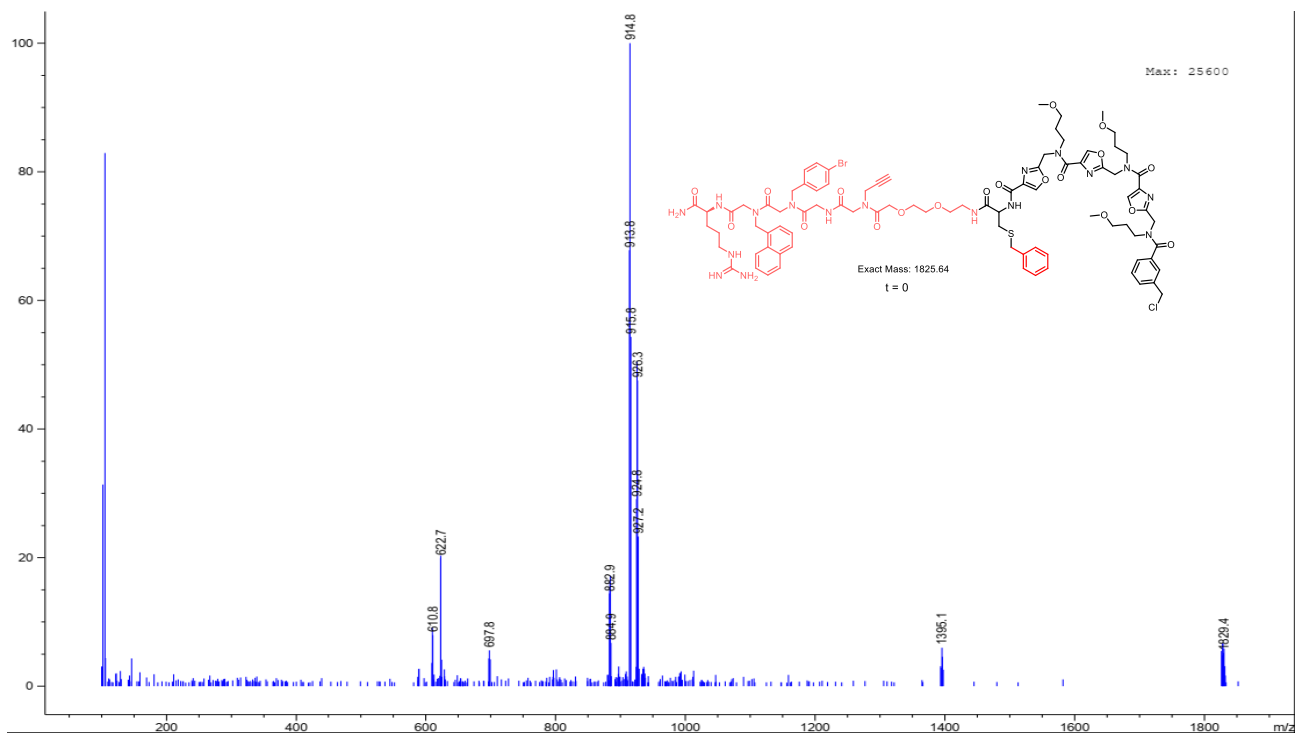

At t = 16 hrs., cyclo-DDA was obtained in major quantity.

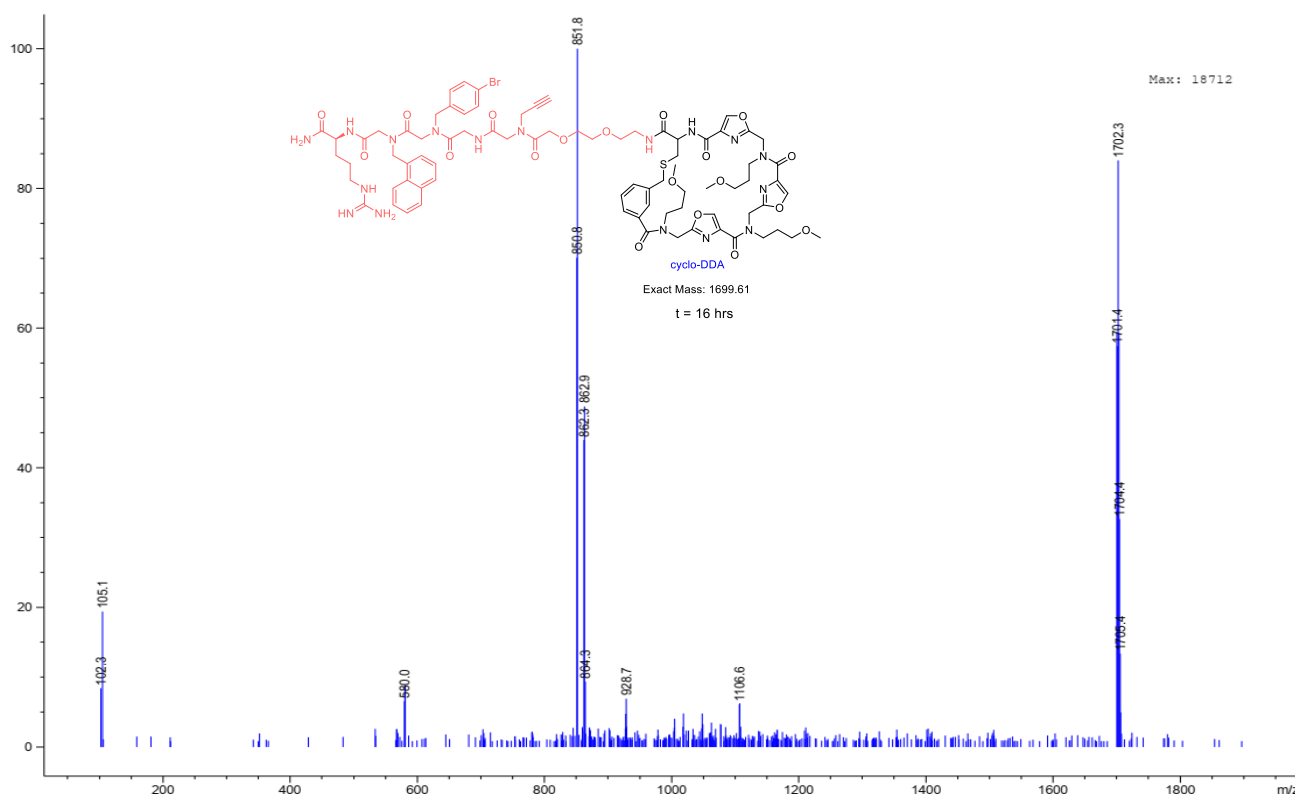

Cyclization progress of DDA from t = 2 – 16 hrs.

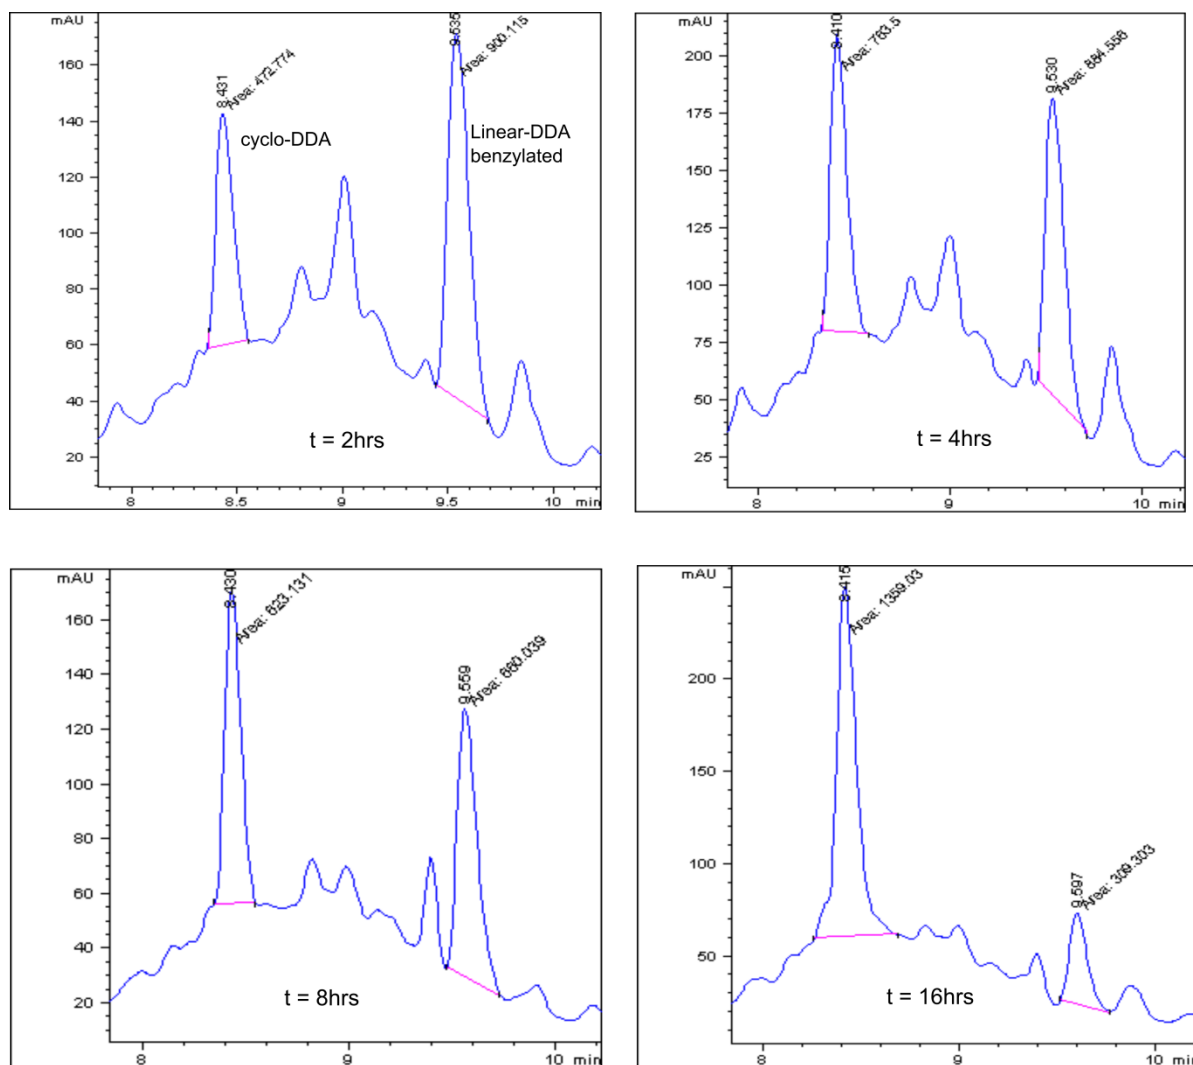

#### 4C: Investigate stability of the sulfhydryl group after 16hrs. of incubation

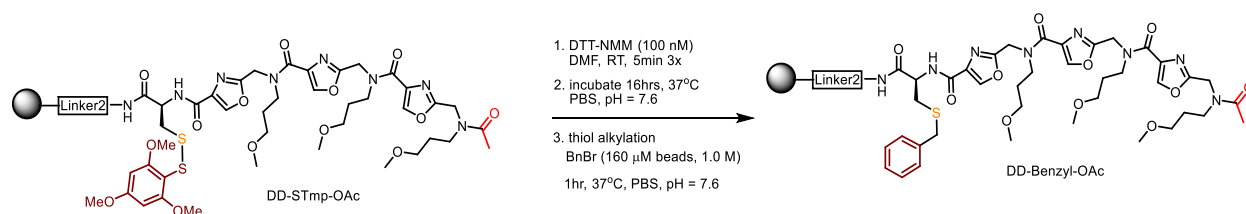

Due to concerns about general thiol oxidation occurring during 16 hours of cyclization, which would prevent mBBr addition and falsely indicate cyclization, an experiment was designed to test the stability of the sulfhydryl group. An acetylated version of the scaffold DD-STmp was synthesized on 160  $\mu$ m beads (linker

2) after adding Fmoc-Cys-(STmp)-OH. 2-(Chloromethyl)oxazole-4-carboxylic acid (3x) was the backbone unit, while 3-methoxypropyl amine was used in the amine positions. After the final amine addition, the compound was acetylated to prevent cyclization. The beads were then transferred to a filter plate (0.5mg/well), thiol protection was removed, and the resin was incubated at 37°C in PBST for 16 hrs. After 3 washes with PBST, the resin was treated with DMSO solution of benzyl bromide (final conc 1.0M, PBST) at 37°C for one hour, cleaved with TFA, and analyzed by MALDI. The data indicate that the sulfhydryl group remains intact and is able to react with the benzyl bromide, as observed below.

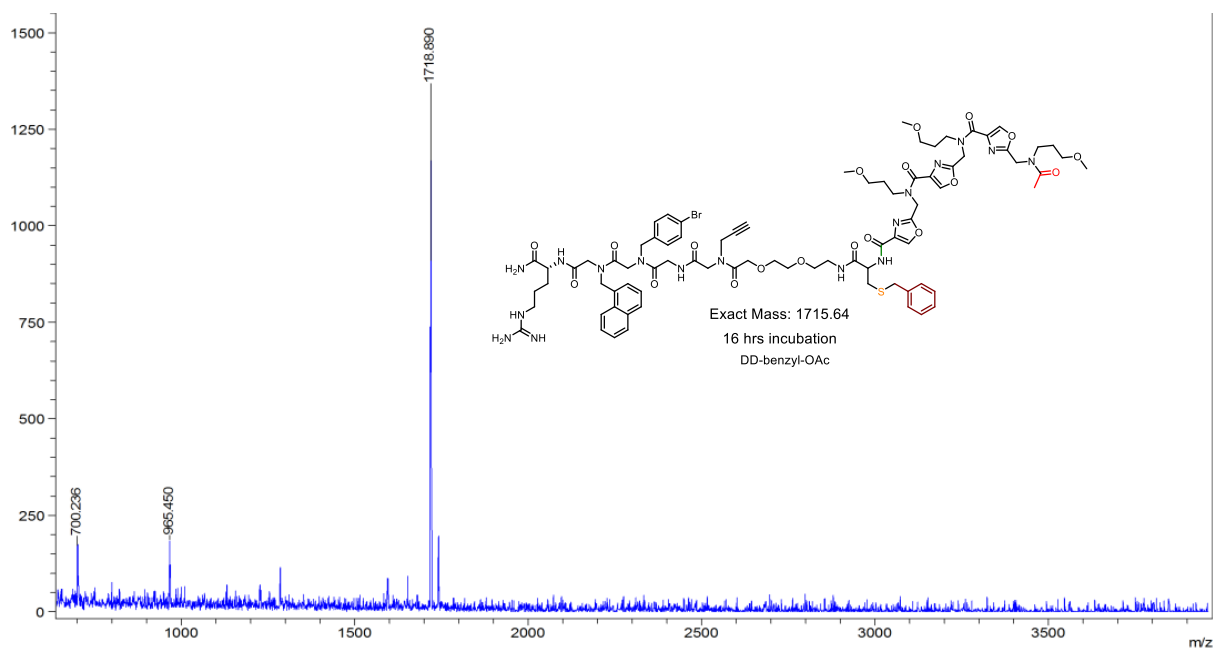

## Section 5: Cyclization efficiency of 64 PICCO scaffolds

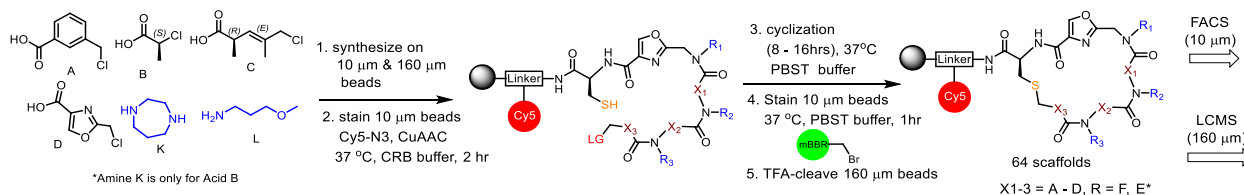

**Synthesis & characterization of 64 scaffolds:** 64 PICCO scaffolds (3.5-mer) were synthesized, in parallel, on 10 (linker-1) & 160 (linker-2)  $\mu\text{m}$  TentaGel resins in separate filter plates (MultiScreen Solvinert 0.45  $\mu\text{m}$  Hydrophobic PTFE). Linkers 1 & 2 were functionalized with Fmoc-Cys-(STmp)-OH, then acid D, and distributed into the filter plate (0.5 mg / well). Scaffold synthesis was completed by iterative couplings of the various acids (A-D, preactivated for 5 minutes with oxyma/DEC/collidine, 1 hr., 37°C) and 3-methoxypropyl amine (1.0 M, 3 hrs., 37°C). Cy5-azide was then clicked onto the 10  $\mu\text{m}$  resin only, followed by copper salt removal with BTP-BB, overnight. Thiol protection was then removed on both 10  $\mu\text{m}$  and 160

$\mu\text{m}$  resins with 100 mM DTT and 100 mM NMM, in DMF solution (3 x 5 min) at RT. The beads were then washed with DMF, DCM, and DMF-PBS, then suspended in PBST (pH = 7.6) buffer and incubated for 8 hrs. at 37°C, for cyclization. With synthesis complete, the 10  $\mu\text{m}$  beads were then washed with and transitioned to PBST, labeled with mBBR (3.0 mM, 37°C, 1 hr), washed with DMF, DCM, and DMF-PBS buffer, then resuspended in PBST and filtered (35  $\mu\text{m}$ ) into 64 FACS tubes for FACS analysis. The 160  $\mu\text{m}$  beads, meanwhile, were washed, suspended in DMF for one hour, and cleaved (90% TFA, 2.5% TIPS, 2.5% thioanisole and 5% DCM) for mass analysis.

**Table T4: Ring closure summary (FACS & LCMS) of 64 Scaffolds**

|   | 1   | 2   | 3   | 4   | 7   | 8   | 9   | 10  |
|---|-----|-----|-----|-----|-----|-----|-----|-----|
| K | AAA | ABA | ACA | ADA | AAB | ABB | ACB | ADB |
| L | BAA | BBA | BCA | BDA | BAB | BBB | BCB | BDB |
| M | CAA | CBA | CCA | CDA | CAB | CBB | CCB | CDB |
| N | DAA | DBA | DCA | DDA | DAB | DBB | DCB | DDB |
| O | AAD | ABD | ACD | ADD | AAC | ABC | ACC | ADC |
| P | BAD | BBD | BCD | BDD | BAC | BBC | BCC | BDC |
| Q | CAD | CBD | CCD | CDD | CAC | CBC | CCC | CDC |
| R | DAD | DBD | DCD | DDD | DAC | DBC | DCC | DDC |

**Note1:** “3.5-mer” means the scaffold has four acids and three amines, but the first acid is always acid D. “2.5-mer means” scaffold has three acids and two amines.

**Note2:** Although 160  $\mu\text{m}$  beads had 8 hrs. incubation time, cyclization may continue during and after TFA cleavage reaction. However, cyclization was frozen for the selected two-color population on 10  $\mu\text{m}$  bead after mBBR addition, but continued during TFA cleavage. This indicates that few scaffolds have more conformational constraint than others and need more time to cyclize.

**Note3:** Some scaffolds cyclized as it is (3.5-mer to 3.5-mer) and some has incomplete acid addition residues, which in most cases also cyclized (2.5-mer).

#### 5A: Ring closure analysis - summary of 64 scaffolds:

Each scaffold is analyzed by how much linear starting material (3.5-mer) is left after cyclization for 8 hrs. If a scaffold had 90% cyclization, it was considered complete. If it had 40% or more linear material left, it was considered incomplete. Due to incomplete synthesis reactions, some “2.5-mer” scaffolds were generated (ABA, ABB, BBA). Regardless, these compounds mostly cyclized as well. Ring closure is primarily reviewed for 3.5-mer compounds and examined that any 2.5-mer linear fragments contributed as false positive. In the LCMS analysis, combined area of all the cyclic compounds are compared against combined area of all the linear compounds.

**Table T5: LCMS analysis of ring closure of 64 scaffolds**

| Entry | Position | Scaffold | cyclization status |            | linear SM | nature         |                      | comment         |
|-------|----------|----------|--------------------|------------|-----------|----------------|----------------------|-----------------|
|       |          |          | FACS               | mass-spec  | left(%)   | cyclic: linear | of scaffold          |                 |
| 1     | K1       | AAA      | incomplete         | complete   | 7.5       | 93.0:7.0       |                      |                 |
| 2     | K2       | ABA      | complete           | complete   |           |                |                      |                 |
| 3     | K3       | ACA      | incomplete         | complete   |           |                |                      |                 |
| 4     | K4       | ADA      | complete           | complete   | 3.8       | 96.2:3.7       |                      |                 |
| 5     | K7       | AAB      | complete           | incomplete | 70.7      | 58.5: 41.4     | difficult to cyclize |                 |
| 6     | K8       | ABB      | complete           | incomplete | 17.2      | 85.4: 14.7     |                      |                 |
| 7     | K9       | ACB      | incomplete         | incomplete | 28.8      | 69.6:20.1      |                      |                 |
| 8     | K10      | ADB      | incomplete         | incomplete | 20.9      | 82.6: 17.3     |                      |                 |
|       |          |          |                    |            |           |                |                      |                 |
| 9     | L1       | BAA      | incomplete         | complete   |           |                |                      |                 |
| 10    | L2       | BBA      | complete           | complete   |           |                |                      |                 |
| 11    | L3       | BCA      | complete           | complete   |           |                |                      |                 |
| 12    | L4       | BDA      | complete           | complete   |           |                |                      |                 |
| 13    | L7       | BAB      | complete           | complete   | 9.7       | 91.0: 8.9      |                      |                 |
| 14    | L8       | BBB      | complete           | complete   |           |                |                      |                 |
| 15    | L9       | BCB      | complete           | complete   | 4.7       | 95.5:4.5       |                      | Linear-2.5 mer  |
| 16    | L10      | BDB      | complete           | incomplete | 30.8      | 76.4: 23.6     |                      |                 |
|       |          |          |                    |            |           |                |                      |                 |
| 17    | M1       | CAA      | complete           | complete   |           |                |                      |                 |
| 18    | M2       | CBA      | complete           | complete   |           |                |                      |                 |
| 19    | M3       | CCA      | complete           | complete   |           |                |                      |                 |
| 20    | M4       | CDA      | complete           | complete   |           |                |                      |                 |
| 21    | M7       | CAB      | complete           | incomplete | 45        | 69.0: 31.0     | difficult to cyclize |                 |
| 22    | M8       | CBB      | complete           | incomplete | 33.4      | 74.7: 25.2     |                      | linear- 3.0 mer |
| 23    | M9       | CCB      | incomplete         | incomplete | 66.7      | 60.0: 40.2     | difficult to cyclize |                 |
| 24    | M10      | CDB      | complete           | incomplete | 27.2      | 78.5: 21.4     |                      |                 |
|       |          |          |                    |            |           |                |                      |                 |
| 25    | N1       | DAA      | complete           | complete   |           |                |                      |                 |
| 26    | N2       | DBA      | complete           | complete   |           |                |                      |                 |
| 27    | N3       | DCA      | complete           | complete   |           |                |                      |                 |
| 28    | N4       | DDA      | complete           | complete   |           |                |                      |                 |
| 29    | N7       | DAB      | complete           | incomplete | 27.7      | 78.4: 21.6     |                      |                 |
| 30    | N8       | DBB      | complete           | incomplete | 34        | 74.6: 25.4     |                      |                 |
| 31    | N9       | DCB      | incomplete         | incomplete | 13.4      | 88.1: 11.8     |                      |                 |
| 32    | N10      | DDB      | complete           | complete   |           |                |                      |                 |
|       |          |          |                    |            |           |                |                      |                 |
| 33    | O1       | AAD      | incomplete         | complete   |           |                |                      |                 |

|    |     |     |            |          |   |           |  |  |
|----|-----|-----|------------|----------|---|-----------|--|--|
| 34 | O2  | ABD | complete   | complete |   |           |  |  |
| 35 | O3  | ACD | incomplete | complete |   |           |  |  |
| 36 | O4  | ADD | complete   | complete |   |           |  |  |
| 37 | O7  | AAC | complete   | complete | 2 | 98.1: 2.0 |  |  |
| 38 | O8  | ABC | complete   | complete |   |           |  |  |
| 39 | O9  | ACC | complete   | complete |   |           |  |  |
| 40 | O10 | ADC | incomplete | complete | 5 | 95.2: 4.8 |  |  |
|    |     |     |            |          |   |           |  |  |
| 41 | P1  | BAD | complete   | complete |   |           |  |  |
| 42 | P2  | BBD | complete   | complete |   |           |  |  |
| 43 | P3  | BCD | complete   | complete |   |           |  |  |
| 44 | P4  | BDD | complete   | complete |   |           |  |  |
| 45 | P7  | BAC | complete   | complete |   |           |  |  |
| 46 | P8  | BBC | complete   | complete |   |           |  |  |
| 47 | P9  | BCC | complete   | complete |   |           |  |  |
| 48 | P10 | BDC | incomplete | complete |   |           |  |  |
|    |     |     |            |          |   |           |  |  |
| 49 | Q1  | CAD | complete   | complete |   |           |  |  |
| 50 | Q2  | CBD | complete   | complete |   |           |  |  |
| 51 | Q3  | CCD | complete   | complete |   |           |  |  |
| 52 | Q4  | CDD | complete   | complete |   |           |  |  |
| 53 | Q7  | CAC | incomplete | complete |   |           |  |  |
| 54 | Q8  | CBC | complete   | complete |   |           |  |  |
| 55 | Q9  | CCC | incomplete | complete |   |           |  |  |
| 56 | Q10 | CDC | incomplete | complete |   |           |  |  |
|    |     |     |            |          |   |           |  |  |
| 57 | R1  | DAD | complete   | complete |   |           |  |  |
| 58 | R2  | DBD | complete   | complete |   |           |  |  |
| 59 | R3  | DCD | complete   | complete |   |           |  |  |
| 60 | R4  | DDD | complete   | complete |   |           |  |  |
| 61 | R7  | DAC | complete   | complete |   |           |  |  |
| 62 | R8  | DBC | complete   | complete |   |           |  |  |
| 63 | R9  | DCC | complete   | complete |   |           |  |  |
| 64 | R10 | DDC | complete   | complete |   |           |  |  |

**For fluorescence and LCMS data, please see section 9.**

## Section 6: Monitor on-resin cyclization progress in presence of DNA

To test for inhibition of macrocyclization by the encoding DNAs, cyclization progress was measured on resins that displayed full-length barcodes. Compounds **DDD**, **DDA**, **DDE** and **EBB** were synthesized on 10 & 160  $\mu\text{m}$  beads ( $\sim 5.0$  mg). Headpiece DNA (0.008 equiv.) & 1,3-azidopropane (1.5 equiv., added two hours after azido-HDNA addition) were clicked together via a CuAAC reaction, and a full length, test-DNA tag was ligated onto the 10  $\mu\text{m}$  beads. After linear precursor synthesis was complete, Cy5-DBCO was attached (final conc. 0.11 mM, 150  $\mu\text{L}$  CRB buffer, for 0.5 mg, 10  $\mu\text{m}$  beads, ON, 37°C) via SPAAC reaction in a filter plate. The thiol-protecting STMP group was then removed and the compounds were cyclized for 16 hrs. at 37°C. The 10  $\mu\text{m}$  beads were then treated with mBBR (final conc. 9.0 mM, 150  $\mu\text{L}$  PBST, 2 hrs., 37°C) while the 160  $\mu\text{m}$  beads were treated with benzyl bromide (1.0 M, 150  $\mu\text{L}$  PBST, 2 hrs., 37°C) to freeze cyclization during or after TFA cleavage. DNA tags from the 10  $\mu\text{m}$  beads were then PCR-amplified and Sanger sequenced. Ring closure status was then analyzed by FACS and MALDI.

**Figure S10: Cyclization and staining in the presence of a DNA tag**

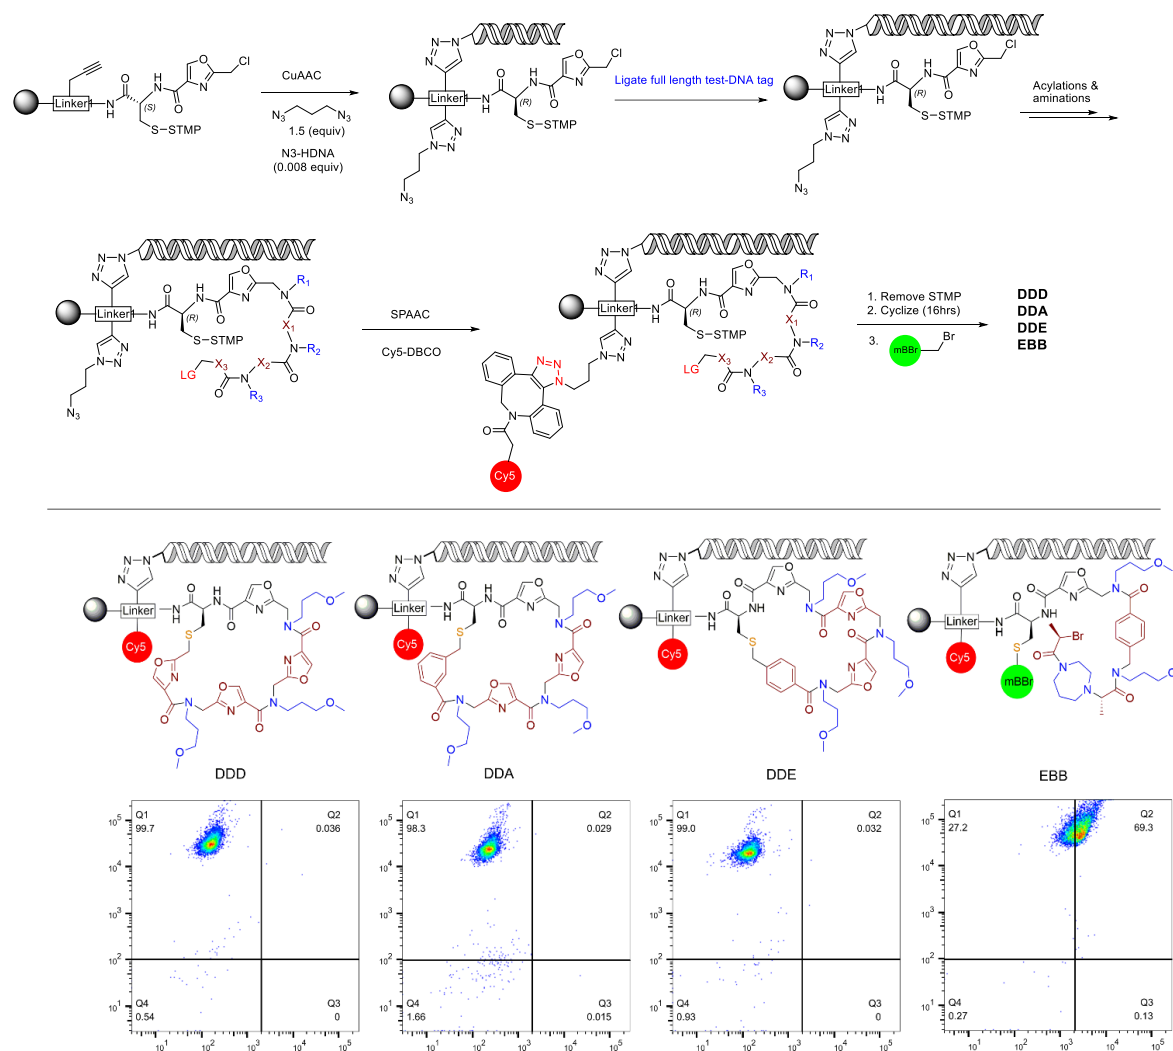

**Figure S11:** DNA tag amplification of compounds DDD, DDA, DDE and EBB from 10 µm beads (1500 beads) in two replicates followed by controls (+ve, -ve) and Sanger sequencing results.

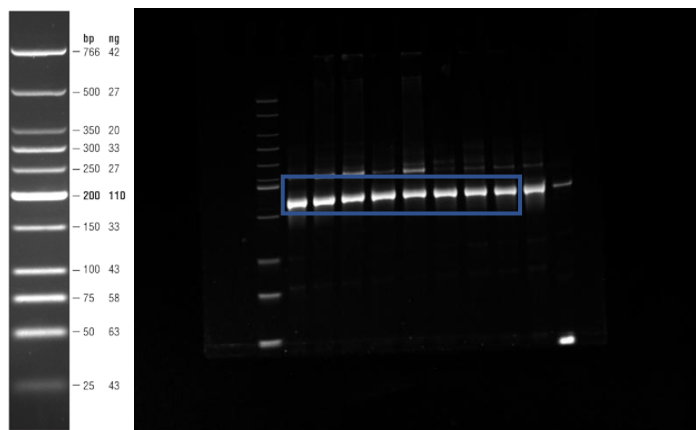

Test-DNA tags of these beads were amplified (Table T7, 1<sup>st</sup> PCR), purified (5.0 µL) by native PAGE gel extraction (6%, 1 x TBE, 4 W, 60 min), with 1X SYBR Gold staining. Gel slices containing 167bp DNA products were excised and suspended in DI water (50.0 µL) in a clean tube overnight. The samples were then centrifuged (5 min, 10,000 RCF), and the supernatants were transferred to clean tubes, diluted 1:10000 in BTPWB, and used as template for Sanger-primer-addition PCRs. The samples were again gel purified by native PAGE gel extraction (233bp DNA), suspended in DI water, centrifuged, and sent for Sanger sequencing (GENEWIZ).

All four samples had same test-DNA tag. They are shown below.

Expected DNA sequence :

1107[+],2209[+],1306[+],2406[+],1506[+],2604[+],1707[+],2802[+],1901[+],2A01[+]

Found sequence as expected. All 4 samples had same test DNA tag below.

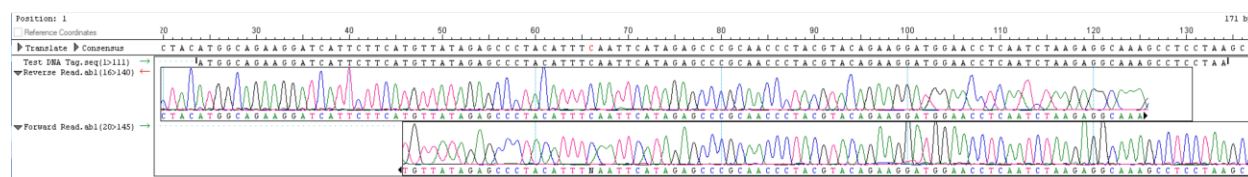



### 6A: Mass analysis of compounds DDD, DDA, DDE and EBB

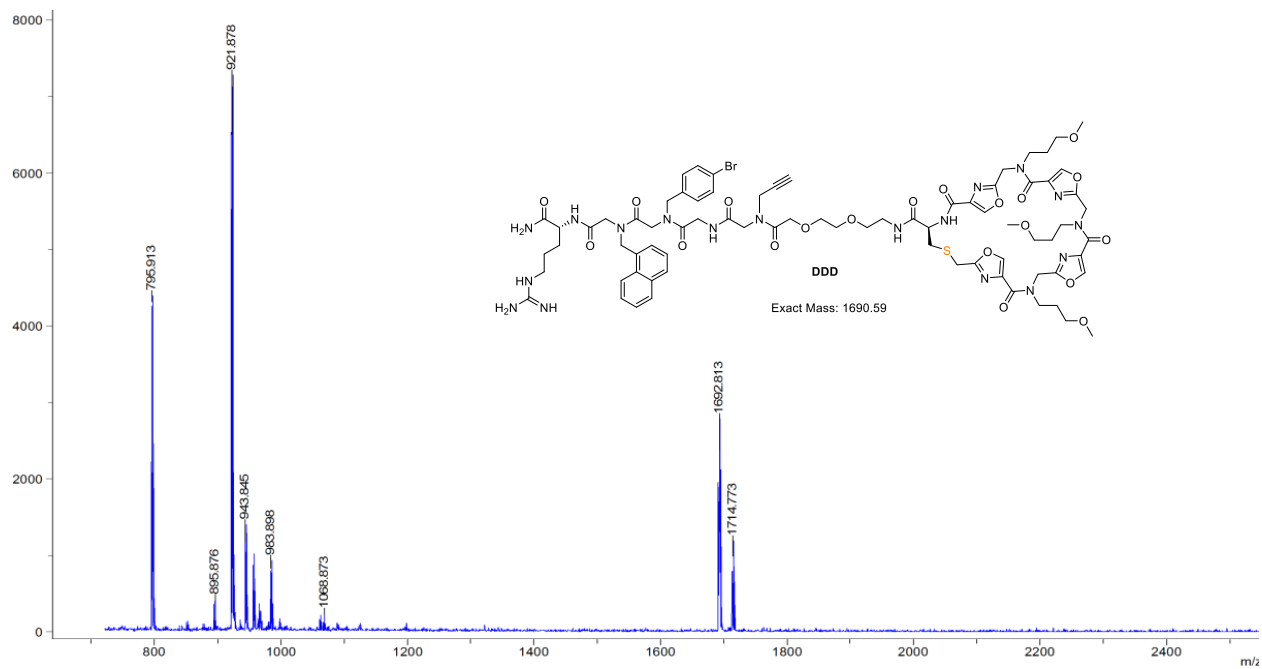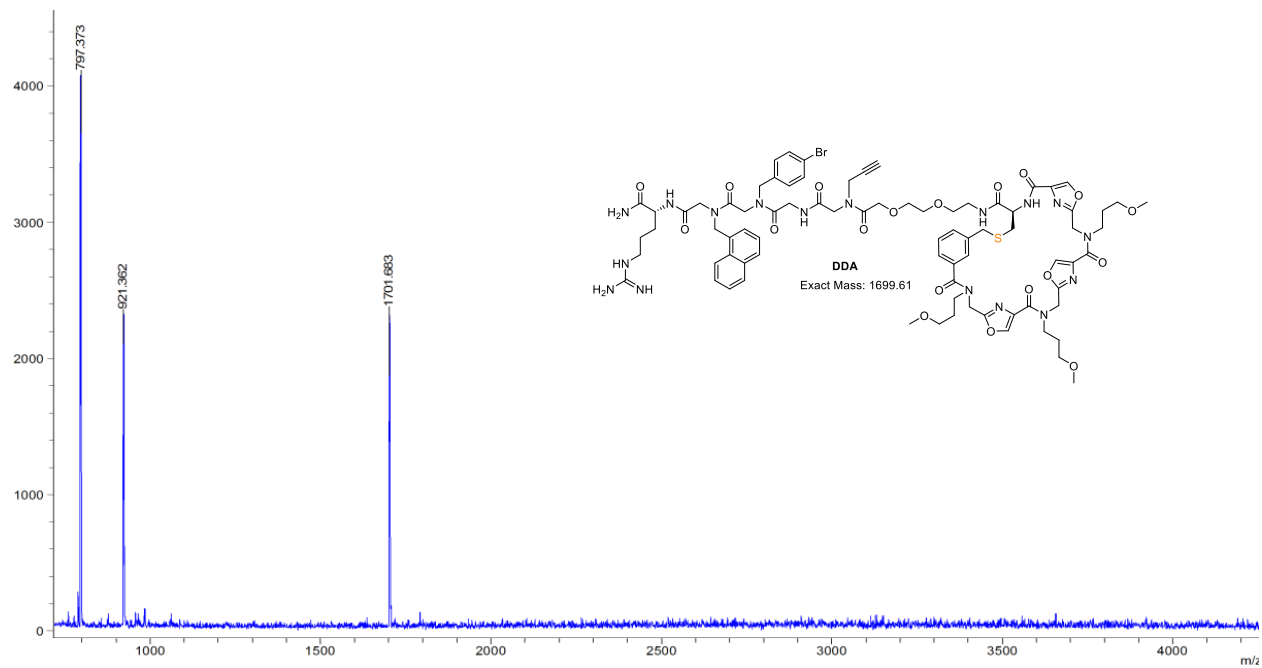

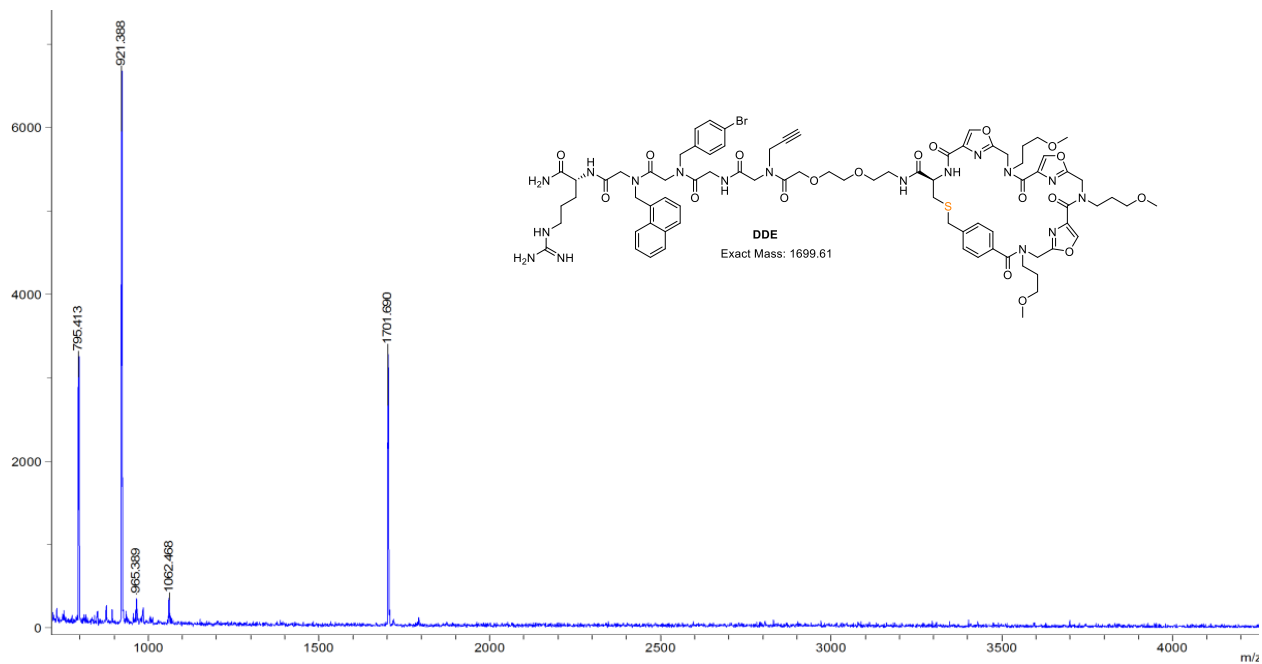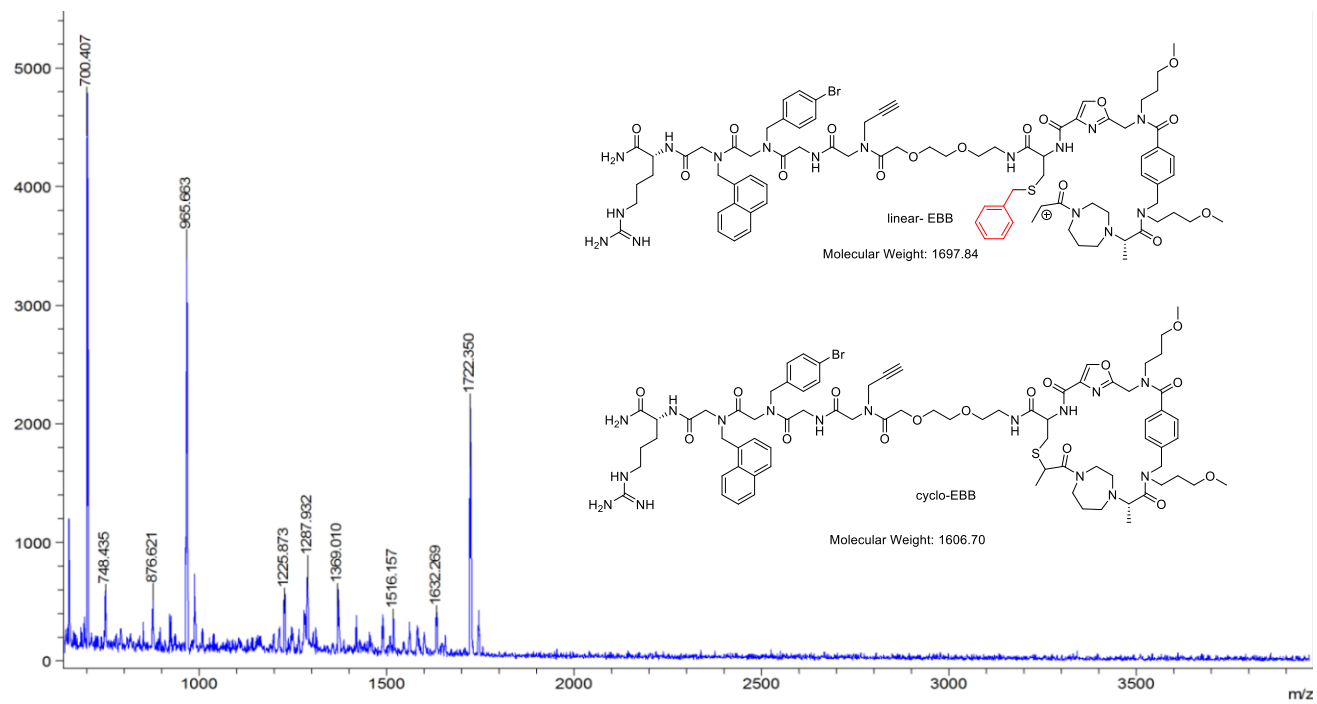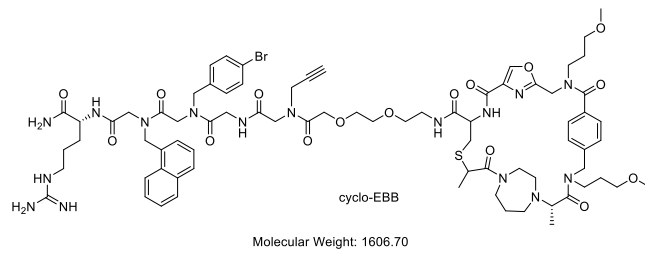

## Section 7: Synthesis & quality control of OBOC thioether macrocyclic DEL for ring closure.

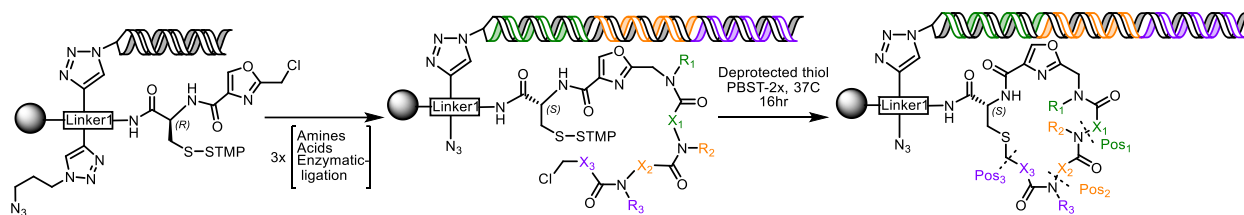

### Position 1

| 1st amine-acid |      |      |      |      |      |      |      |      |      |      |  |      |      |
|----------------|------|------|------|------|------|------|------|------|------|------|--|------|------|
|                | 2401 | 2402 | 2403 | 2404 | 2405 | 2406 | 2407 | 2408 | 2409 | 2410 |  | 1309 | 1310 |
|                |      |      |      |      |      |      |      |      |      |      |  |      |      |
| 1301           |      |      |      |      |      |      |      |      |      |      |  | 2401 |      |
| 1302           |      |      |      |      |      |      |      |      |      |      |  | 2402 |      |
| 1303           |      |      |      |      |      |      |      |      |      |      |  | 2403 |      |
| 1304           |      |      |      |      |      |      |      |      |      |      |  | 2404 |      |

### Position 2

| 2nd amine-acid |      |      |      |      |      |      |      |      |      |      |  |      |      |
|----------------|------|------|------|------|------|------|------|------|------|------|--|------|------|
|                | 2601 | 2602 | 2603 | 2604 | 2605 | 2606 | 2607 | 2608 | 2609 | 2610 |  | 1509 | 1510 |
|                |      |      |      |      |      |      |      |      |      |      |  |      |      |
| 1501           |      |      |      |      |      |      |      |      |      |      |  | 2601 |      |
| 1502           |      |      |      |      |      |      |      |      |      |      |  | 2602 |      |
| 1503           |      |      |      |      |      |      |      |      |      |      |  | 2603 |      |
| 1504           |      |      |      |      |      |      |      |      |      |      |  | 2604 |      |

### Position 3

| 3rd amine-acid |      |      |      |      |      |      |      |      |      |      |  |      |      |
|----------------|------|------|------|------|------|------|------|------|------|------|--|------|------|
|                | 2801 | 2802 | 2803 | 2804 | 2805 | 2806 | 2807 | 2808 | 2809 | 2810 |  | 1709 | 1710 |
|                |      |      |      |      |      |      |      |      |      |      |  |      |      |
| 1701           |      |      |      |      |      |      |      |      |      |      |  | 2801 |      |
| 1702           |      |      |      |      |      |      |      |      |      |      |  | 2802 |      |
| 1703           |      |      |      |      |      |      |      |      |      |      |  | 2803 |      |
| 1704           |      |      |      |      |      |      |      |      |      |      |  | 2804 |      |

**Synthesis & analysis:** Linker-1 was synthesized on 25.0 mg of 10  $\mu$ m TentaGel amine beads, Fmoc-Cys(STmp)-OH and acid **D** were then added, in succession. Azido headpiece-DNA and 1, 3-diazidopropane

were attached via CuAAC reaction following general method **2C**. The beads were then distributed into a filter plate (0.5 mg/ well, 48 wells, Millipore MultiScreen Solvinert 0.45  $\mu$ m Hydrophobic PTFE). Subsequently, FWD primer along with 11xx-22xx primers were ligated, beads were pooled and redistributed. Amines (1.0 M, 150.0  $\mu$ L, 3 hrs., 37°C) were reacted first, followed by acid additions for each position **X1-3** (Acid/DIC/Oxyrna/Collidine: 80/126/80/80mM, pre-activated, 150.0  $\mu$ L, 3hrs., 37°C) following the general scheme **7A**. Beads were then washed (150.0  $\mu$ L, DMF, DCM, DMF, BTP-WB) and suspended in BTP-WB overnight before encoding.

**X1-3** positions were encoded with primers 13xx-24xx, 15xx-26xx and 17xx-28xx, respectively. In general, an encoding oligonucleotide ligation mixture containing T4 DNA ligase (15000 U) in BTP-LB (1.35X) was prepared and aliquoted into all plate wells (110  $\mu$ L). Stocks of  $\approx$ 13XX[ $\pm$ ] (Table **T5**) and  $\approx$ 24XX[ $\pm$ ] were annealed and then added to the appropriate wells (final conc for each codes  $\sim$ 10mM, total vol 150uL) the plate was sealed with adhesive foil, and incubated with agitation (4h, RT, 800 rpm).

After each ligation, beads were transitioned to and equilibrated in DMF overnight before the chemistry steps. The library- id (1901-2A07) and reverse primer were then ligated to complete the DNA barcodes. The beads were then washed with and equilibrated with BTP-WB buffer, overnight. An aliquot of the library ( $\sim$ 5.0 mg) was transferred to a fritted spin-column (Bio-Rad, large filter, 10- $\mu$ m pore size) and re-suspended in CRB, DMSO solution of Cy5-DBCO (final conc 0.11 mM, 150uL) was added and incubated at 37°C for overnight (2hr also works). The beads were then washed with BTPWB, DMF, and DCM before re-suspending in DMF for overnight. The thiol-protecting STmp group was then removed (100.0 mM DTT-NMM in DMF, 500  $\mu$ L, 3x, RT). The beads were then suspended in PBST (1.00 ml) and incubated at 37°C to monitor cyclization. After 8, 12 & 16 hrs., aliquots of beads were transferred to a filter pate, stained with mBBri (9.0 mM, DMF, 37°C, 2hrs) , and analyzed by flow cytometry. Beads that have higher fluorescence intensities than control-**3** (due to incomplete cyclization) were separated and collected.

Sorted beads were transferred from the FACS collection tubes to clean centrifuge tubes (0.2 mL) and concentrated (to  $\sim$ 5.0  $\mu$ L). Encoding DNA tags were amplified (Table **T7**, 1<sup>st</sup> PCR) and purified (5.0  $\mu$ L) by native PAGE gel extraction (6%, 1 x TBE, 4 W, 60 min). Gel slices containing 167bp DNA products were excised and suspended in DI water (50.0  $\mu$ L) in a clean tube overnight. The samples were then centrifuged (5 min, 10,000 RCF), transferred to a clean tube, diluted to (1:10000 in BTPWB), and used as template for Illumina primer addition PCRs. Illumina index primers, along with the P5-univ-FWD primer, SuperFi buffer, SuperFI DNAP, and dNTP mix were premixed, 1.0  $\mu$ L of the template from the 1<sup>st</sup> PCR was added, and the mixture was thermally cycled (Table **T7**). The samples were again gel purified (289bp DNA), eluted with DI water, and deep sequenced.

**Table T6. Oligonucleotide sequence lookup table.**

| <b>Overhangs</b> |             | <b>Coding Sequences</b> |          |              |          |
|------------------|-------------|-------------------------|----------|--------------|----------|
| Overhang #       | Sequence    | Identifier #            | Sequence | Identifier # | Sequence |
| ≈X1XX[+]         | /5Phos/ATGG | ≈1X01[+]                | AAGAGAGG | ≈2X01[+]     | AGTTTCAG |
| ≈X1XX[-]         | /5Phos/TGA  | ≈1X01[-]                | CCTCTCTT | ≈2X01[-]     | CTGAAACT |
| ≈X2XX[+]         | /5Phos/TCA  | ≈1X02[+]                | ACGGAGCA | ≈2X02[+]     | AACCTCAA |
| ≈X2XX[-]         | /5Phos/AAC  | ≈1X02[-]                | TGCTCCGT | ≈2X02[-]     | TTGAGGTT |
| ≈X3XX[+]         | /5Phos/GTT  | ≈1X03[+]                | ACAAAGAG | ≈2X03[+]     | AATCCCAT |
| ≈X3XX[-]         | /5Phos/TAG  | ≈1X03[-]                | CTCTTTGT | ≈2X03[-]     | ATGGGATT |
| ≈X4XX[+]         | /5Phos/CTA  | ≈1X04[+]                | AAGGAGGT | ≈2X04[+]     | AACCCTAC |
| ≈X4XX[-]         | /5Phos/GAA  | ≈1X04[-]                | ACCTCCTT | ≈2X04[-]     | GTAGGGTT |
| ≈X5XX[+]         | /5Phos/TTC  | ≈1X05[+]                | AGAAAGCA | ≈2X05[+]     | ATCCTCTC |
| ≈X5XX[-]         | /5Phos/GCG  | ≈1X05[-]                | TGCTTTCT | ≈2X05[-]     | GAGAGGAT |
| ≈X6XX[+]         | /5Phos/CGC  | ≈1X06[+]                | ATAAAGGT | ≈2X06[+]     | ATTCTCCG |
| ≈X6XX[-]         | /5Phos/AAC  | ≈1X06[-]                | ACCTTTAT | ≈2X06[-]     | CGGAGAAT |
| ≈X7XX[+]         | /5Phos/GTT  | ≈1X07[+]                | ATAGAAGG | ≈2X07[+]     | CGCCTTCA |
| ≈X7XX[-]         | /5Phos/TAG  | ≈1X07[-]                | CCTTCTAT | ≈2X07[-]     | TGAAGGCG |
| ≈X8XX[+]         | /5Phos/CTA  | ≈1X08[+]                | ATGGGAGT | ≈2X08[+]     | CGTTCCTG |
| ≈X8XX[-]         | /5Phos/AGGC | ≈1X08[-]                | ACTCCCAT | ≈2X08[-]     | CAGGAACG |
|                  |             | ≈1X09[+]                | GCAAAGGA | ≈2X09[+]     | CTCTCCAC |
|                  |             | ≈1X09[-]                | TCCTTTGC | ≈2X09[-]     | GTGGAGAG |
|                  |             | ≈1X10[+]                | TTGAGGAT | ≈2X10[+]     | TCCTCTTA |
|                  |             | ≈1X10[-]                | ATCCTCAA | ≈2X10[-]     | TAAGAGGA |

### Primers

| PCR Primer # | Sequence                                 |
|--------------|------------------------------------------|
| ≈0001[+]     | /5Phos/GCCGCCAGTCCTGCTCGCTTCGCTAC        |
| ≈0001[-]     | /5Phos/CCATGTAGCGAAGCGAGCAGGACTGGGCGGCGG |
| ≈0901[+]     | /5Phos/GCCTGTTTGCCCGCCAGTTGTTGTGCCAC     |
| ≈0901[-]     | /5AmMC6/GTGGCACAACAAC TGCGGGCAAC         |

**Table T7: PCR amplification of encoding DNA tags from beads.**

| 1st PCR: Amplification of encoding DNA tags from beads |      |             |           |        |                  |
|--------------------------------------------------------|------|-------------|-----------|--------|------------------|
| rxn volume:                                            | 50   | total rxns: | 6         |        |                  |
| reagent                                                | vol  | stock       | MM volume | Cycle: |                  |
| initial vol                                            | 10   |             | 60        |        |                  |
| 5X SuperFi Buffer                                      | 10.0 | 5X          | 60.0      | 1      | 98°C, 30 sec     |
| 0.2 mM dNTP Mix                                        | 1.0  | 10 mM       | 6.0       | 2      | 98°C, 10 sec.    |
| 0.3 µM ABM99-2A-07*                                    | 1.5  | 10 uM       | 9.0       | 3      | 46°C, 10 sec.    |
| 0.3 µM ABM063                                          | 1.5  | 10 uM       | 9.0       | 4      | 72°C, 15 s       |
| SuperFi DNAP                                           | 0.5  | 2U/ul       | 3.0       | 5      | Goto 2, 25 times |
| ddH2O                                                  | 25.5 | ddH2O       | 153.0     | 6      | 4" hold          |
| total                                                  | 50.0 | total       | 300.0     |        |                  |
| *library specific rev primer                           |      |             |           |        |                  |

**Table T8: NGS sample preparation- addition of Illumina index primer**

| 2nd PCR- add illumina rev-index and fwd primers |      |             |           |          |                  |
|-------------------------------------------------|------|-------------|-----------|----------|------------------|
| rxn volume:                                     | 50   | total rxns: | 9         |          |                  |
| reagent                                         | vol  | stock       | MM volume | Cycle 2: |                  |
| 5X SuperFi Buffer                               | 10.0 | 5X          | 90.0      | 1        | 98°C, 2 min      |
| 0.2 mM dNTP Mix                                 | 1.0  | 10 mM       | 9.0       | 2        | 98°C, 10 sec.    |
| 0.3 µM P5 Univ Fwd2                             | 1.5  | 10 uM       | 13.5      | 3        | 36°C, 10 sec.    |
| 0.3 µM Index Rev (1-4)*                         | 1.5  | 10 uM       |           | 4        | 72°C, 15 s       |
| SuperFi DNAP                                    | 0.5  | 2U/ul       | 4.5       | 5        | Goto 2, 25 times |
| DNA Template (1k & 10k )fold diluted            | 1.0  |             |           | 6        | 4" hold          |
| ddH2O                                           | 34.5 | ddH2O       | 310.5     |          |                  |
| total                                           | 50.0 | total       | 427.5     |          |                  |
| *Illumina index                                 |      |             |           |          |                  |

1st PCR: 25 Cycles

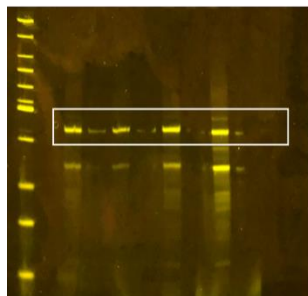

2nd PCR: Illumina primer addition, 10Kx dilution

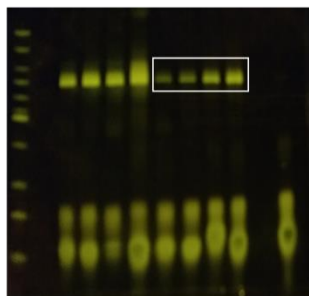

**Figure S12:** Fluorescence readout of DNA-linked control-3. Methionine-DNA-CY5 beads were treated with mBBR and analyzed by FACS. This is a negative control for analyzing OBOC macrocyclic DEL through a flow cytometer.

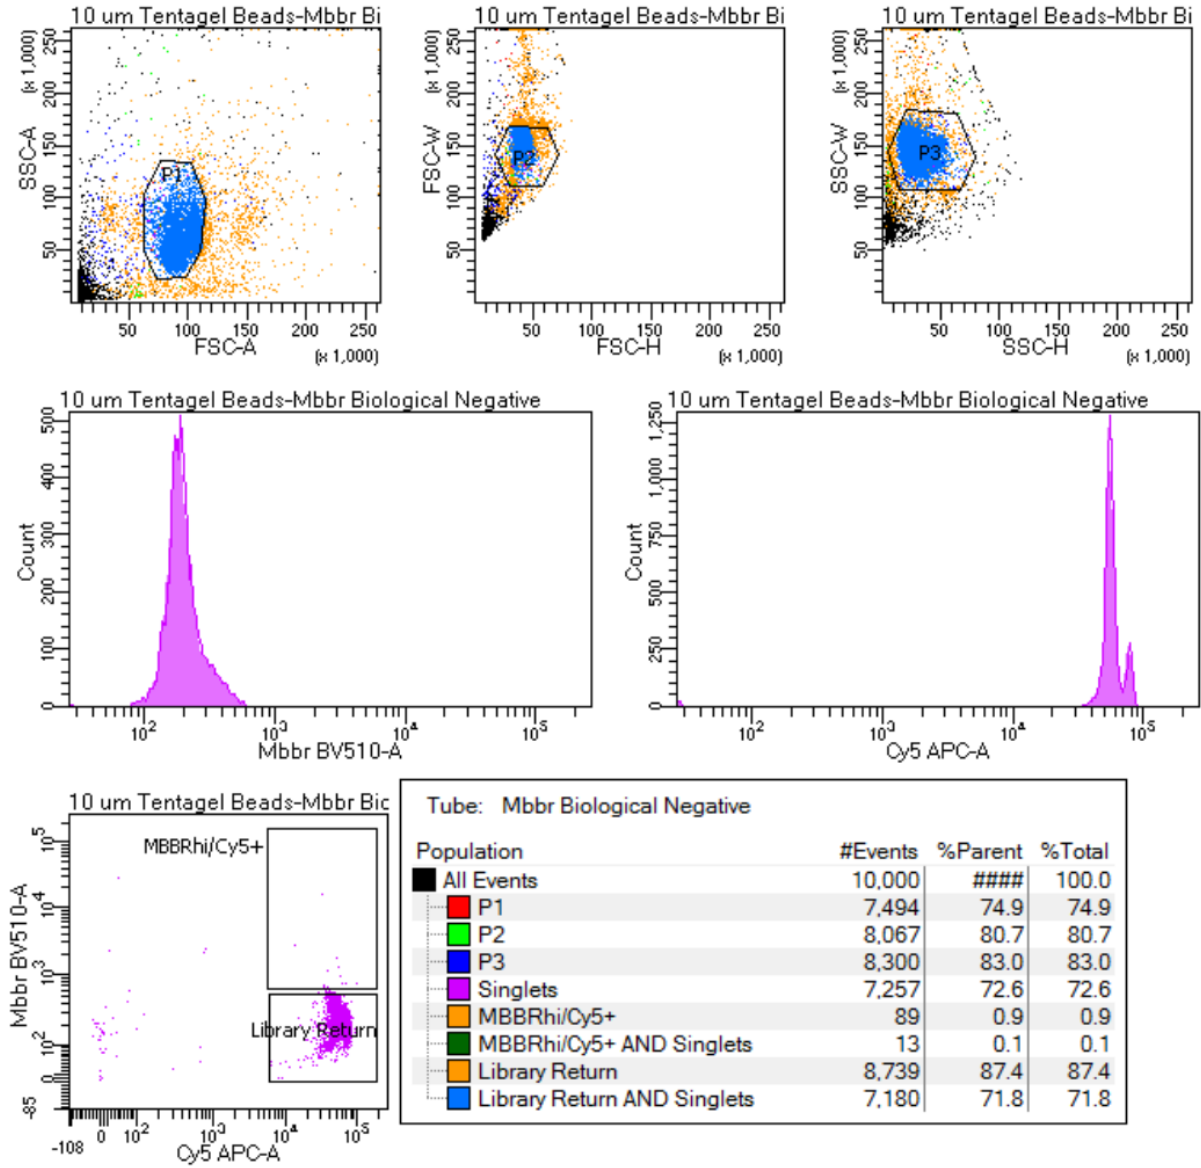

**Figure S13:** Fluorescence readout of beads from the macrocyclic DEL. After cyclization, beads were stained with Cy5-DBCO and MBBR (9.0 mM) and analyzed by FACS.

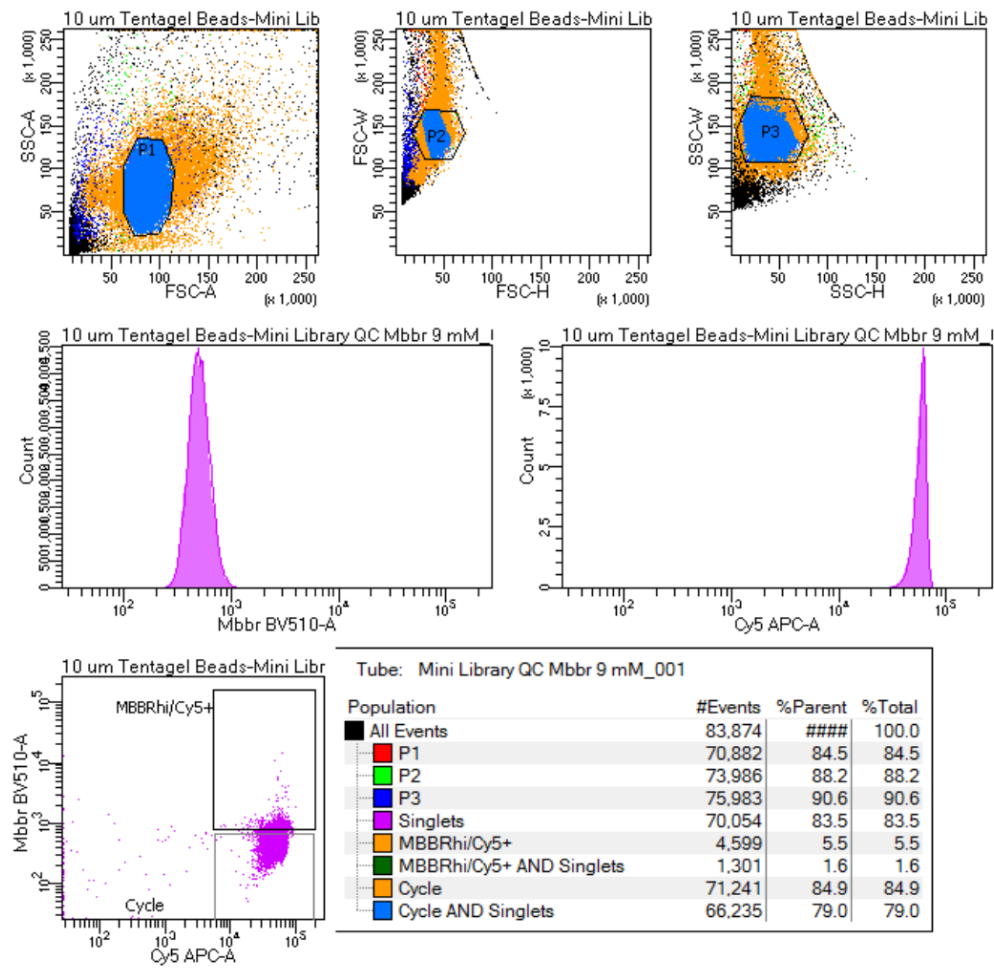

**Sorting result:** Beads that appeared in the cyclic region (MBBR/Cy5+) were collected and their encoding tags were deep sequenced.

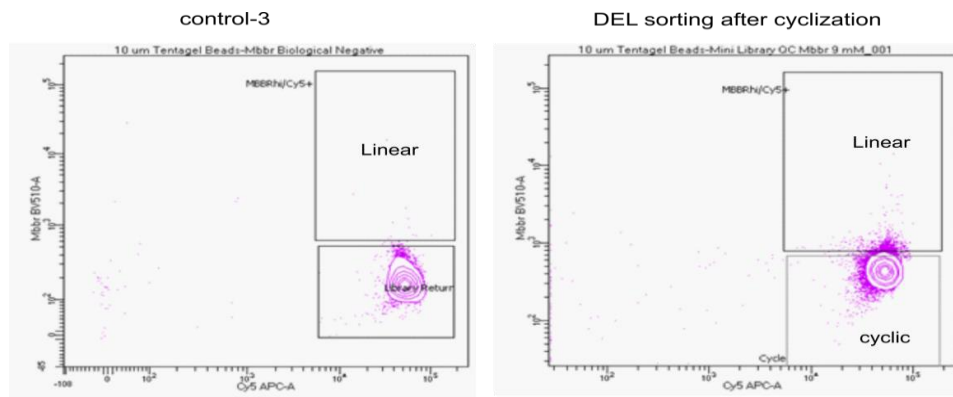

For sequencing analysis of naïve and FACS-sorted beads, please see **Sections 10 & 11**, respectively.



**Figure S14:** (A) After deep sequencing, difficult to cyclize scaffolds were arranged by count (up to 5 copies, 74 scaffolds). Each line indicates a combination of three acids at position X1-3 for a scaffold along with its molecular ID (left) and the number of times it was present in the collected pool (right). (B) Acids A – G and amines were used in position X1-X3 to construct DEL scaffolds. 4% of DEL members were capped with acid H & I to keep them as linear controls for FACS analysis.

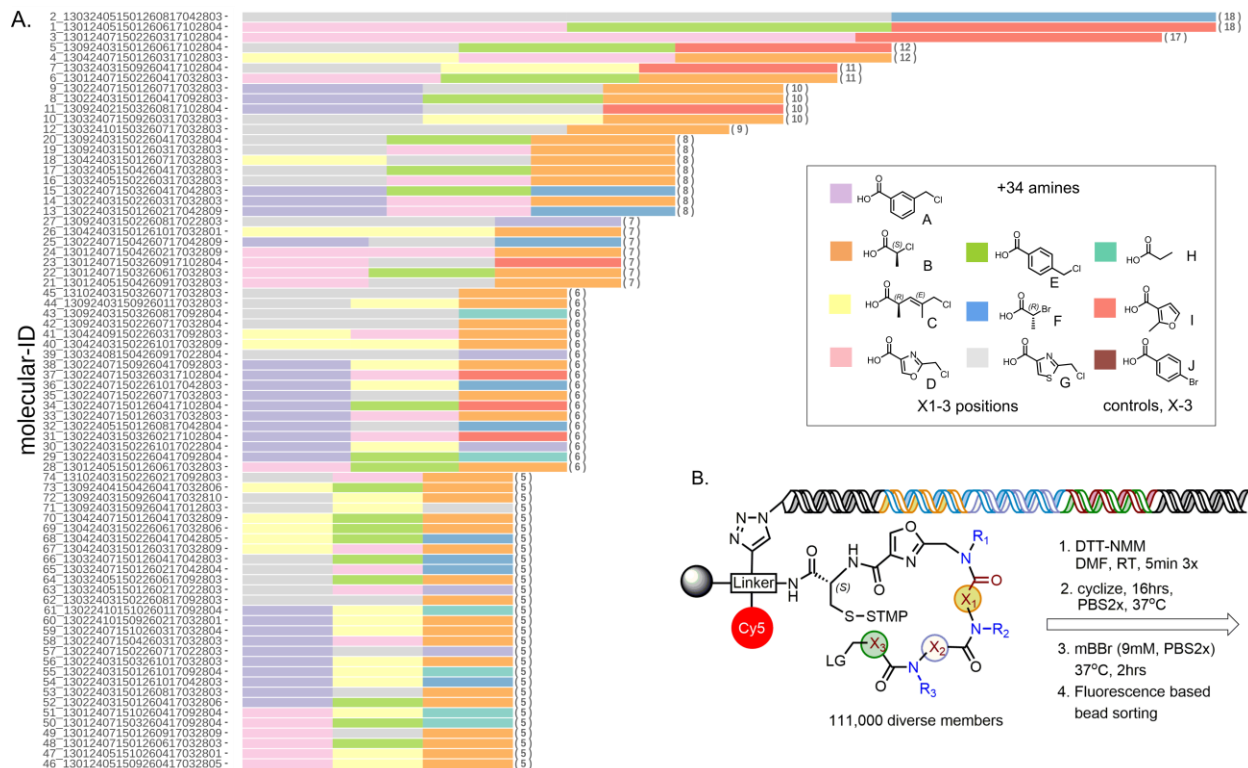

## Section 8: FACS & LCMS analysis of 64-scaffolds

### Fluorescence data analysis of 64 PICCO scaffolds after cyclization

Fluorescence readouts were recorded for each of the 64 scaffolds. Status of ring closures were determined by FACS and cross-referenced with mass spectra to see if there is any linear starting material remaining. The goal was to ultimately gauge the state of cyclization from FACS data by locating the majority of the bead population, without cleaving compounds from beads.

Each FACS plot is divided into 4 quadrants; Q1-Q4. After cyclization and two dye additions, if the majority of the bead population for a particular scaffold stays in Q1 (Cy5 +, MBBR -), cyclization will be considered as complete. If the scaffold does not cyclize efficiently, it will have unreacted thiol groups and will be present in Q2 (Cy5 +, MBBR +), as it will pick up both dyes. Negative control beads that were not treated with any dye will stay in Q4 (Cy5 -, MBBR -). These populations are gated based on the fluorescence intensity of control compound 3.

## Section-9A: Fluorescence readout of 64 scaffolds after cyclization.

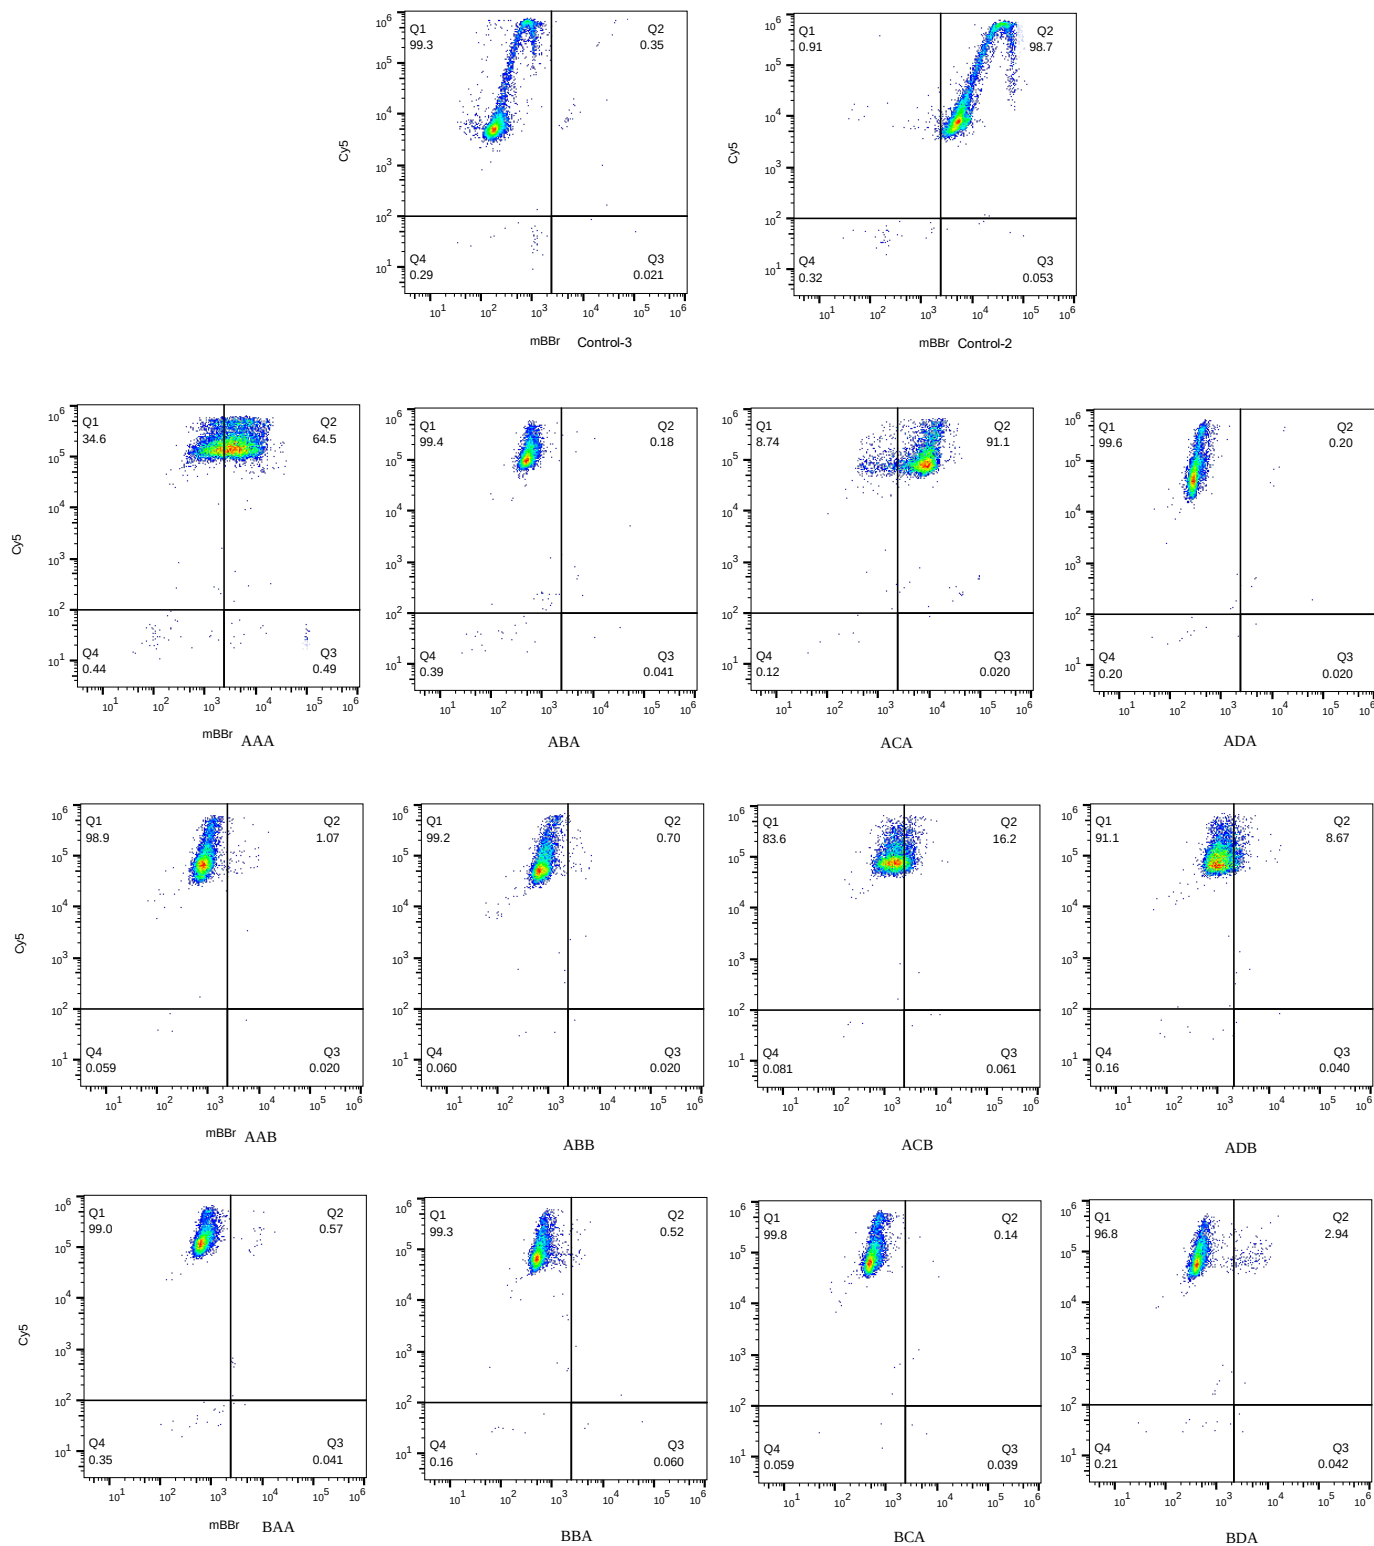

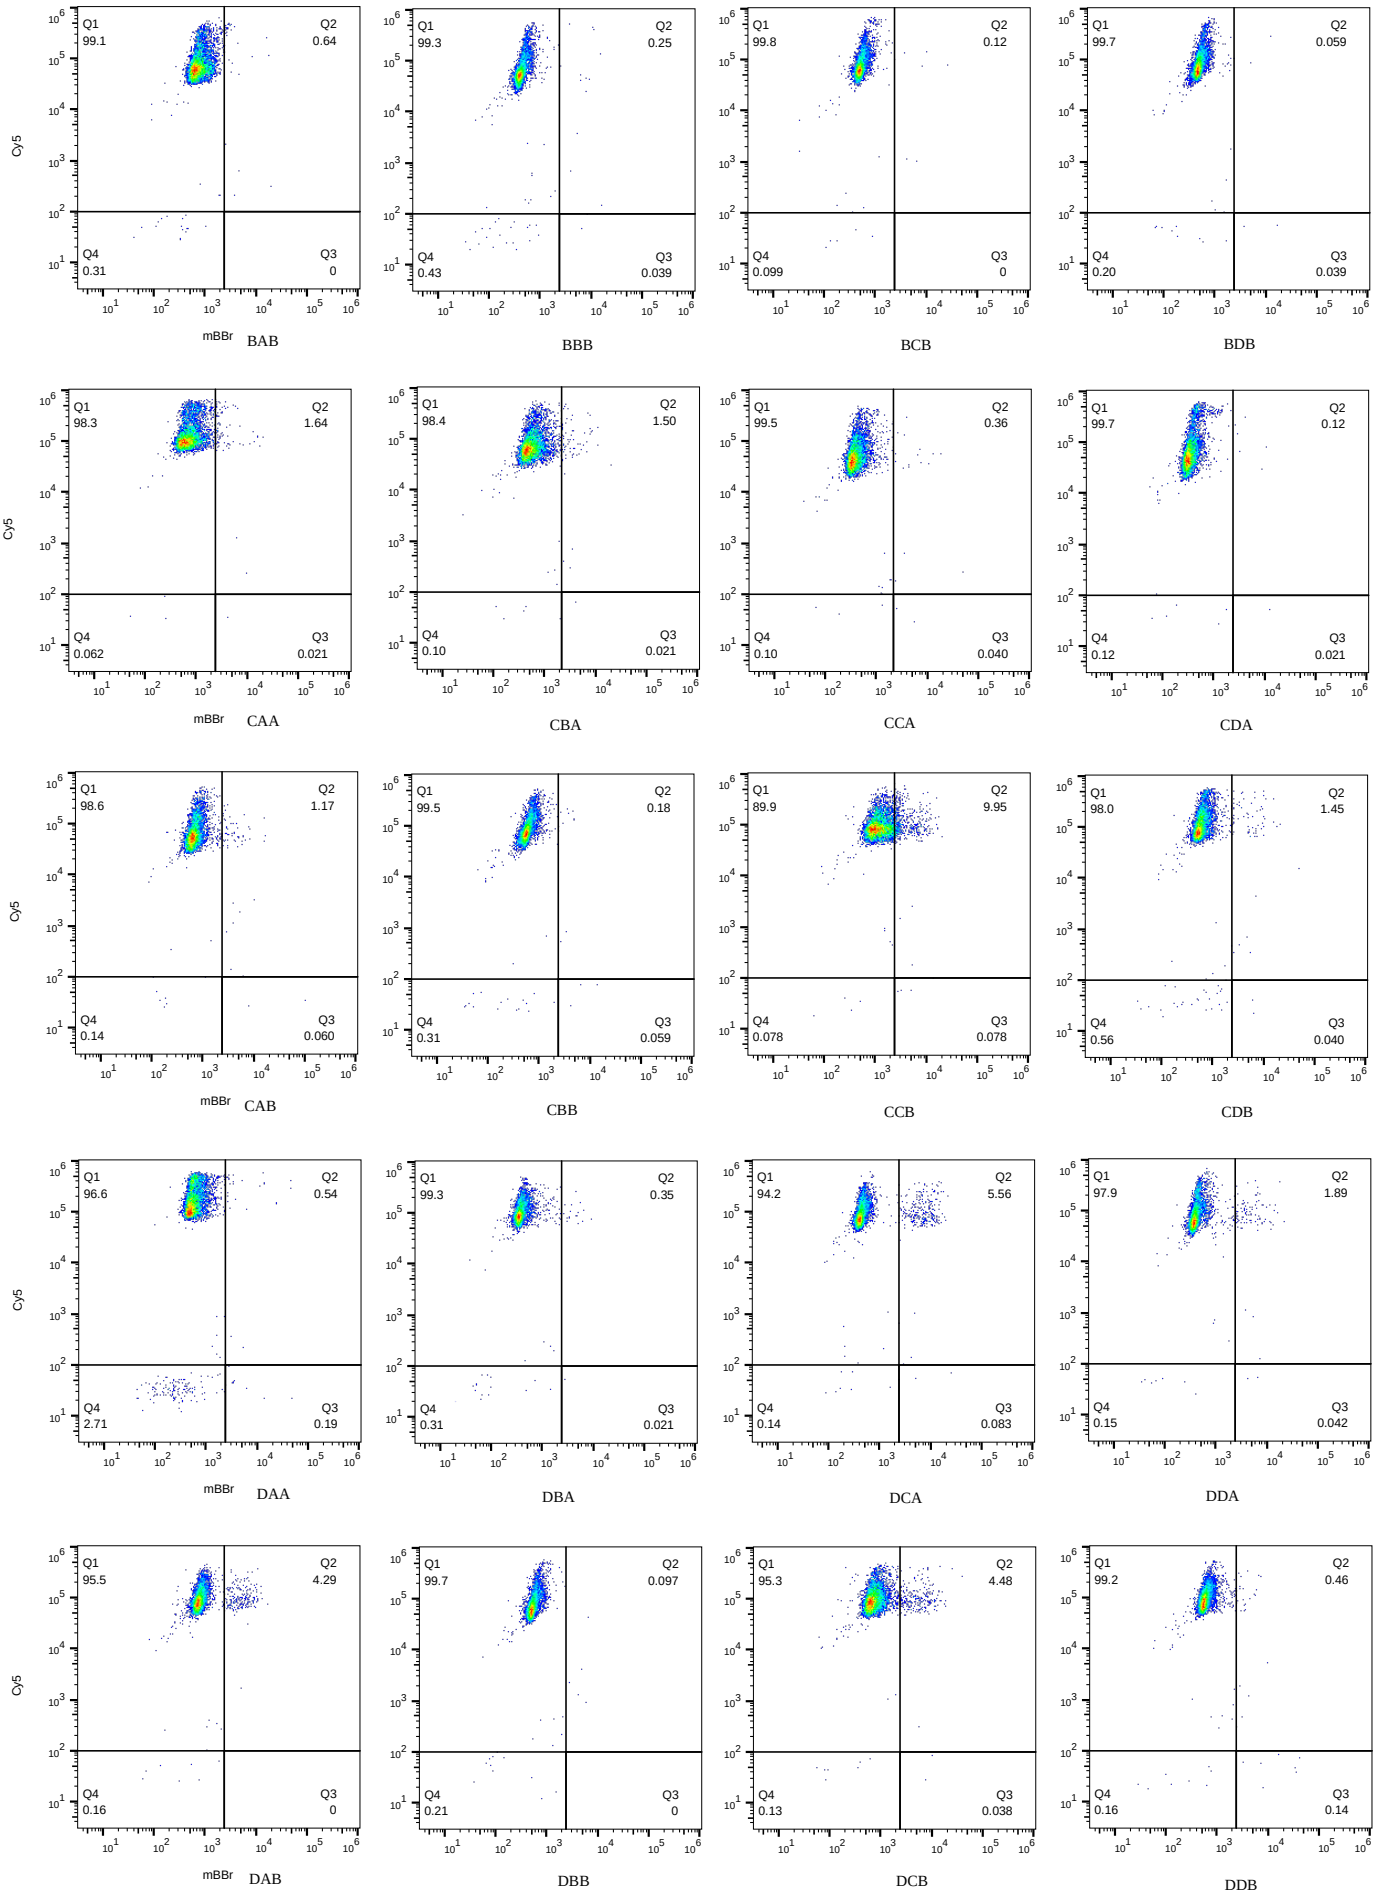

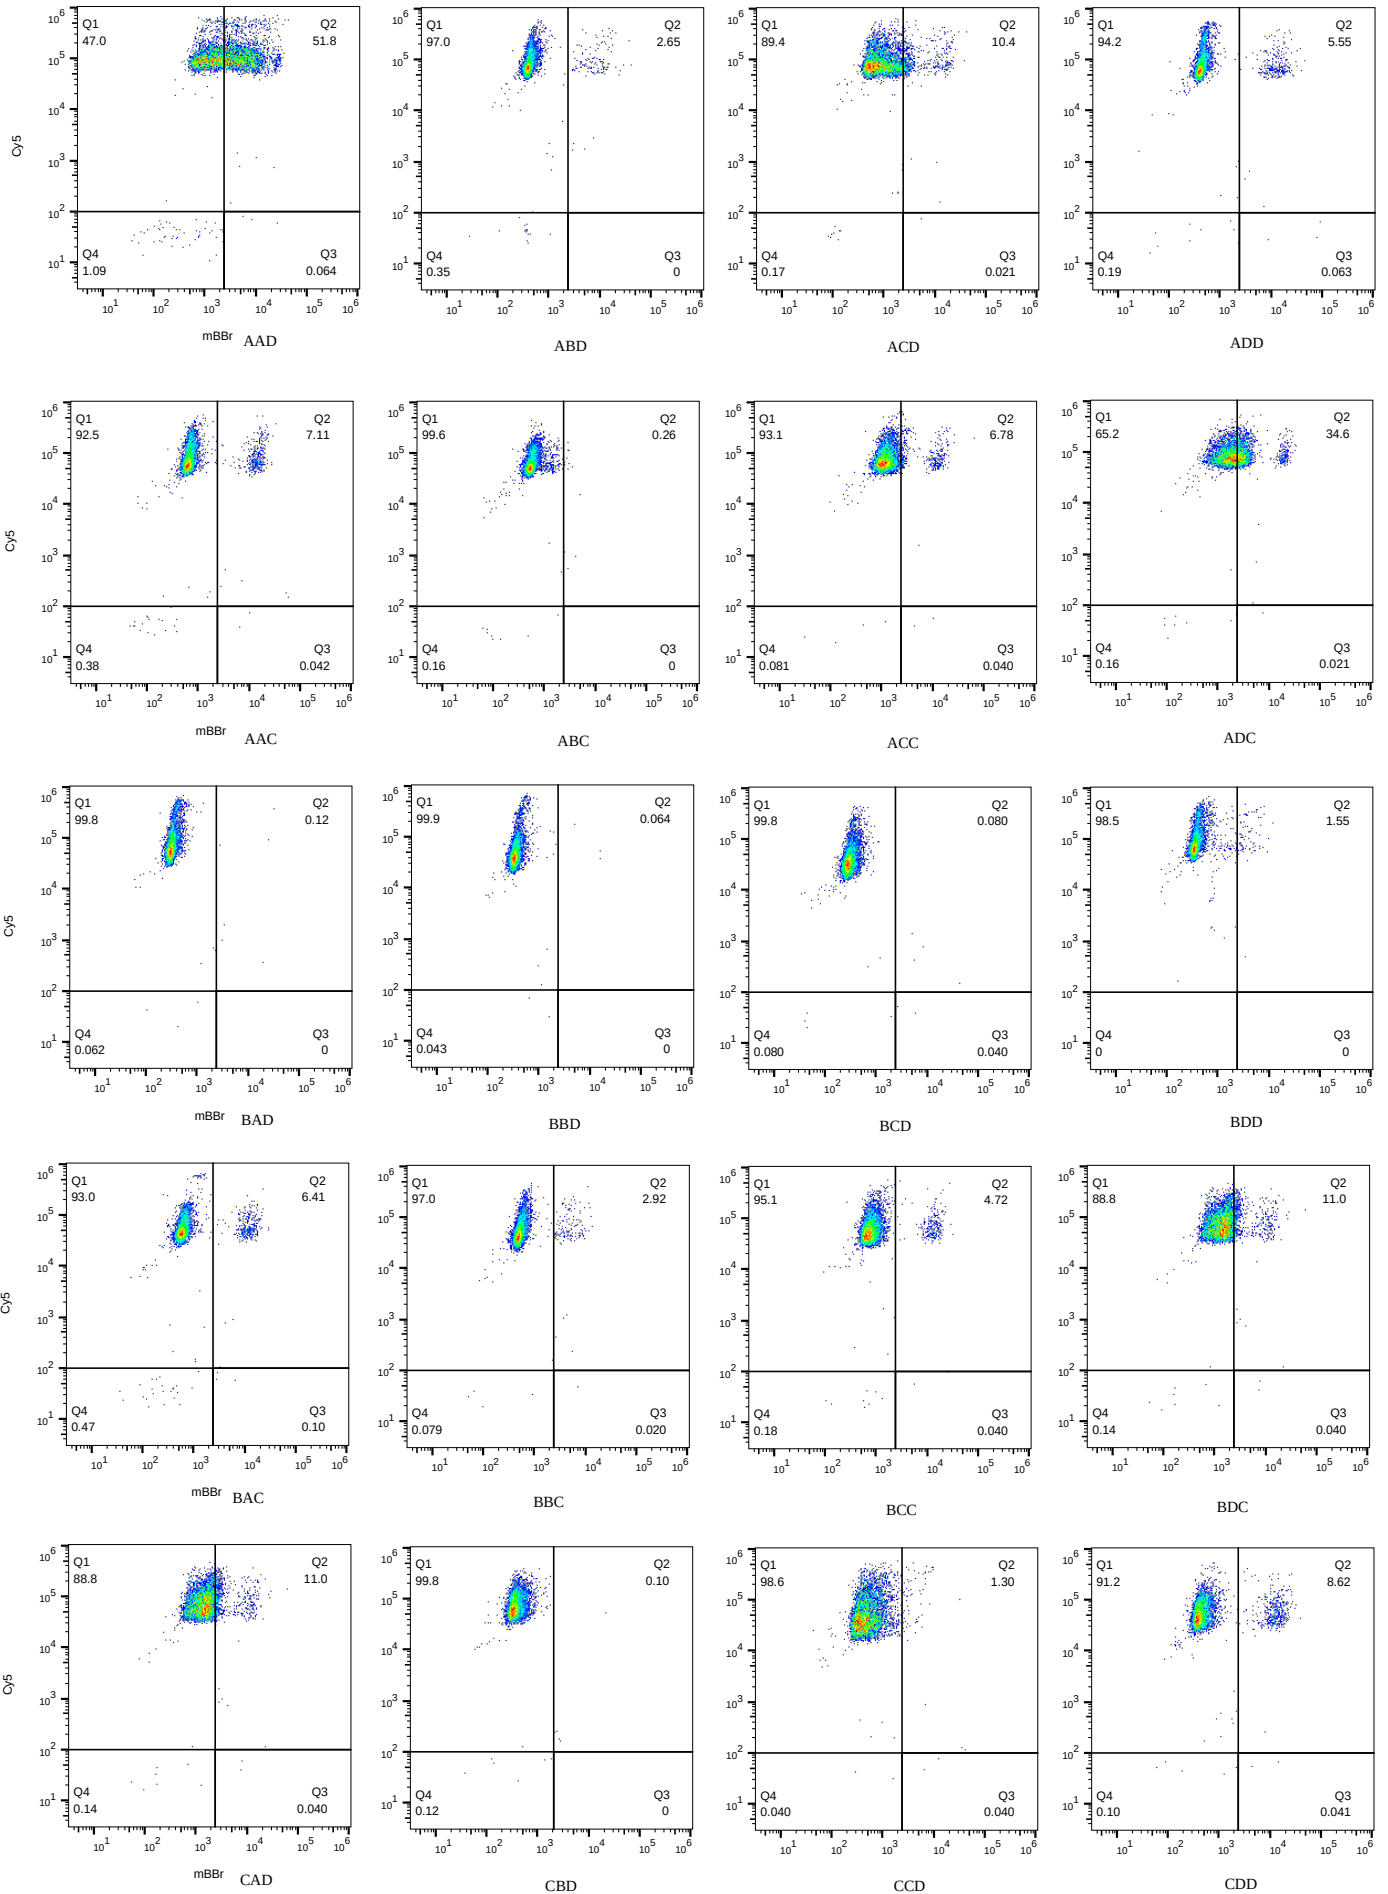

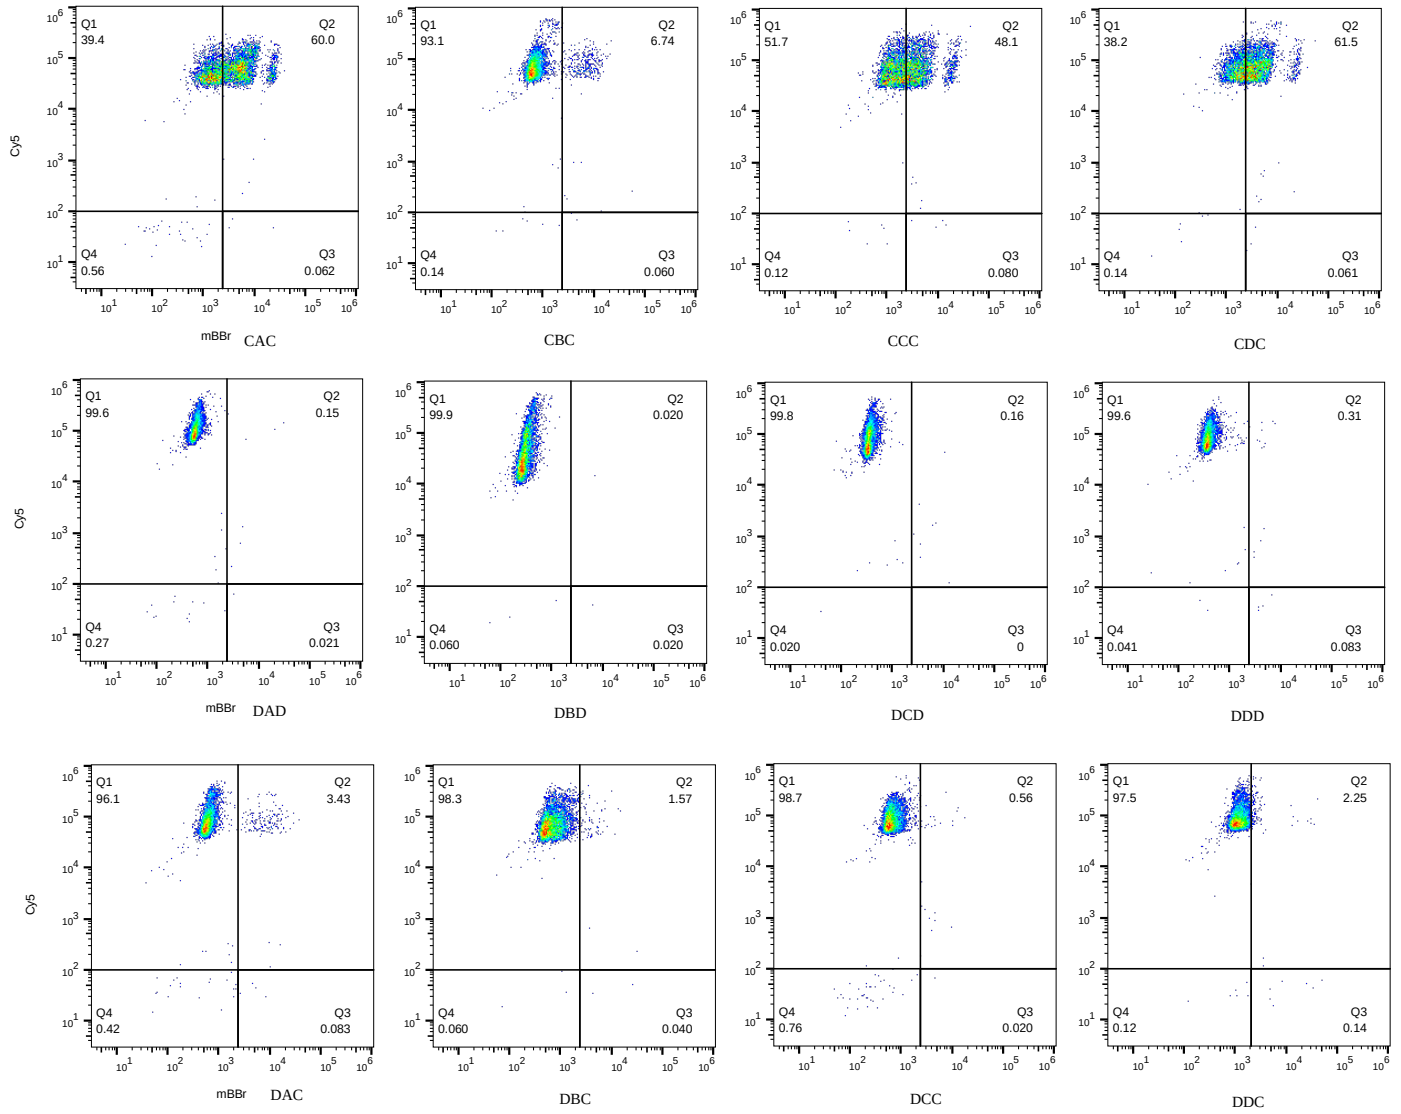

## Section-9B: Mass analysis of 64-scaffolds

**K1-[AAA]:** Incomplete cyclization was detected on 10  $\mu\text{m}$  but was >90% complete on 160  $\mu\text{m}$  beads.

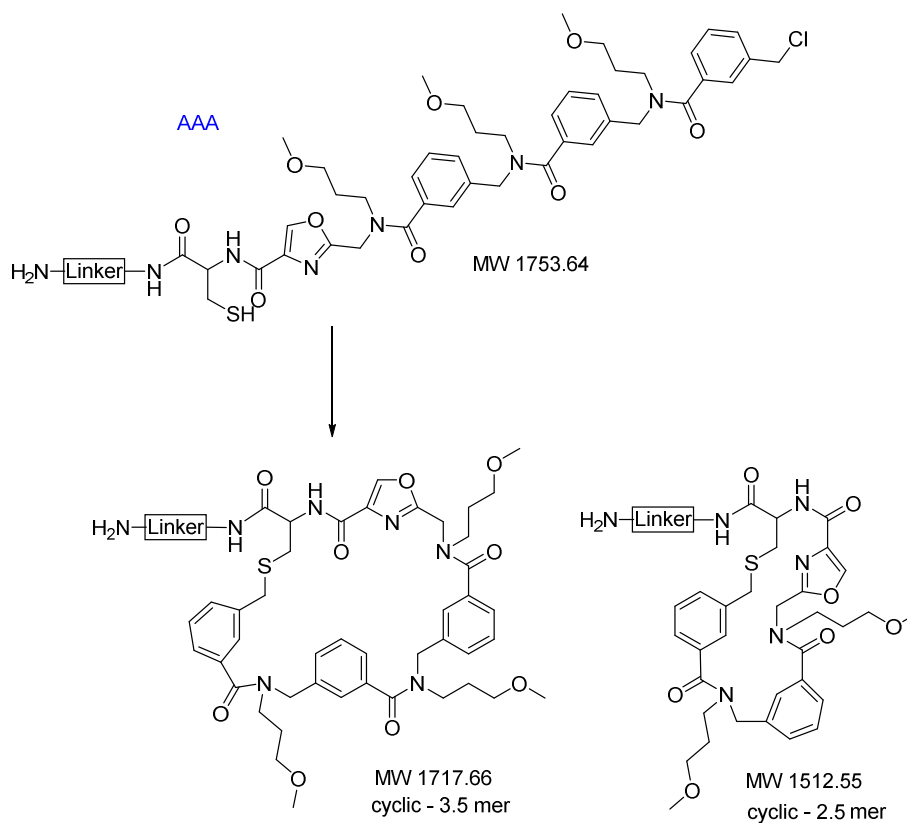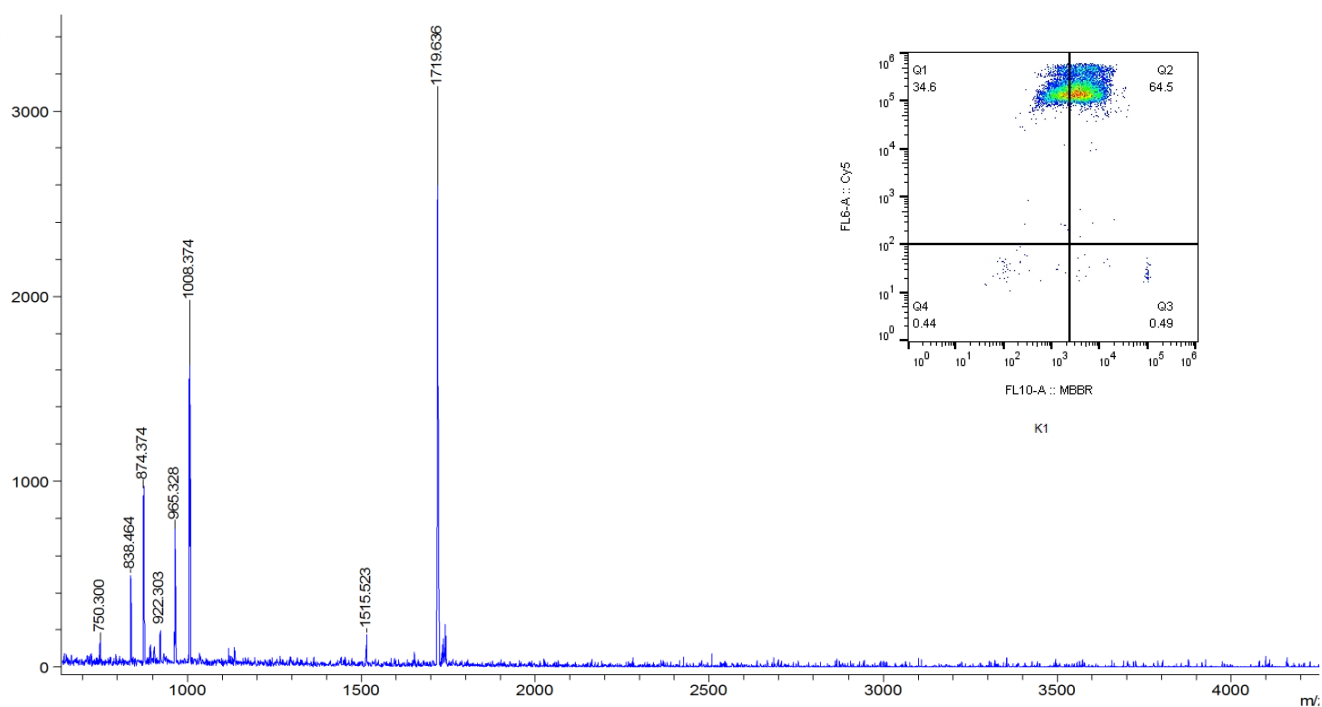

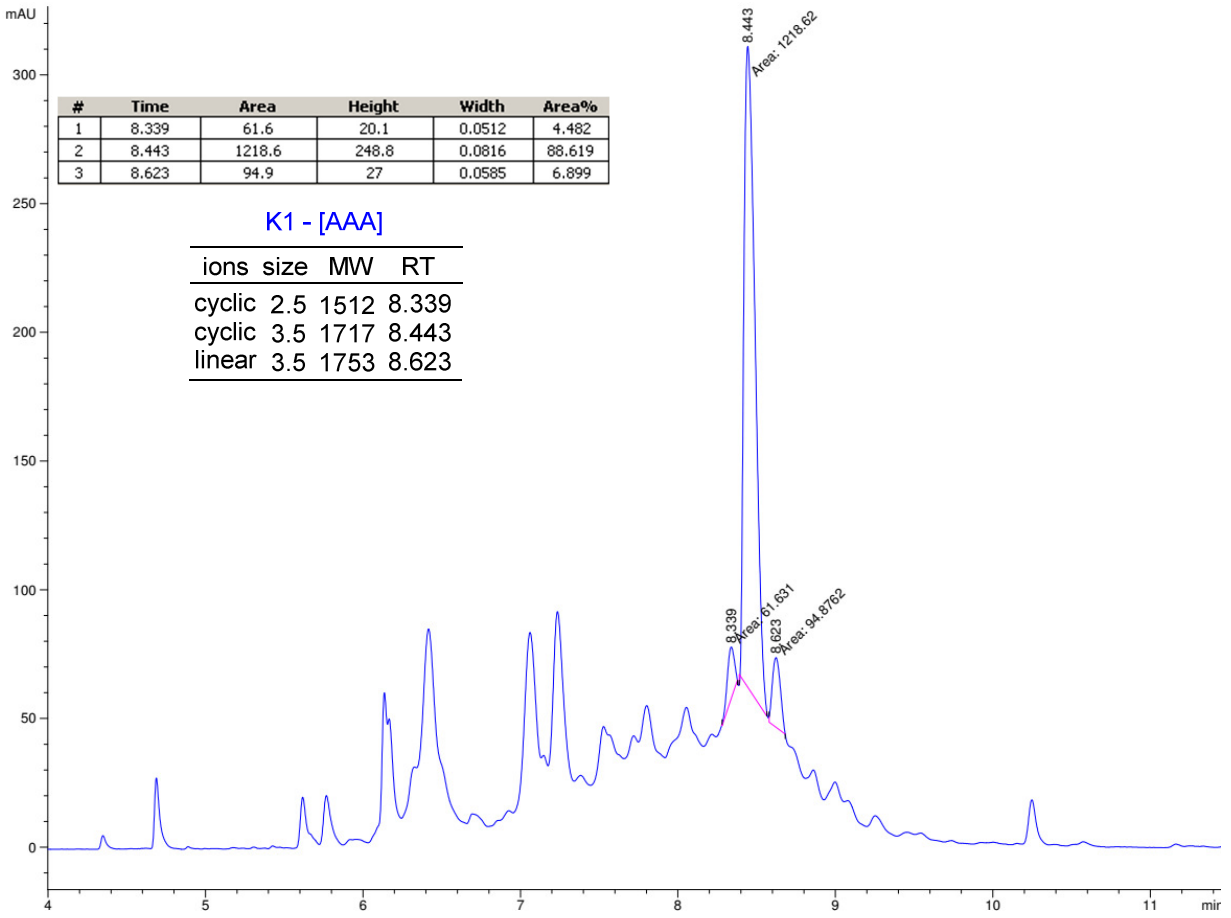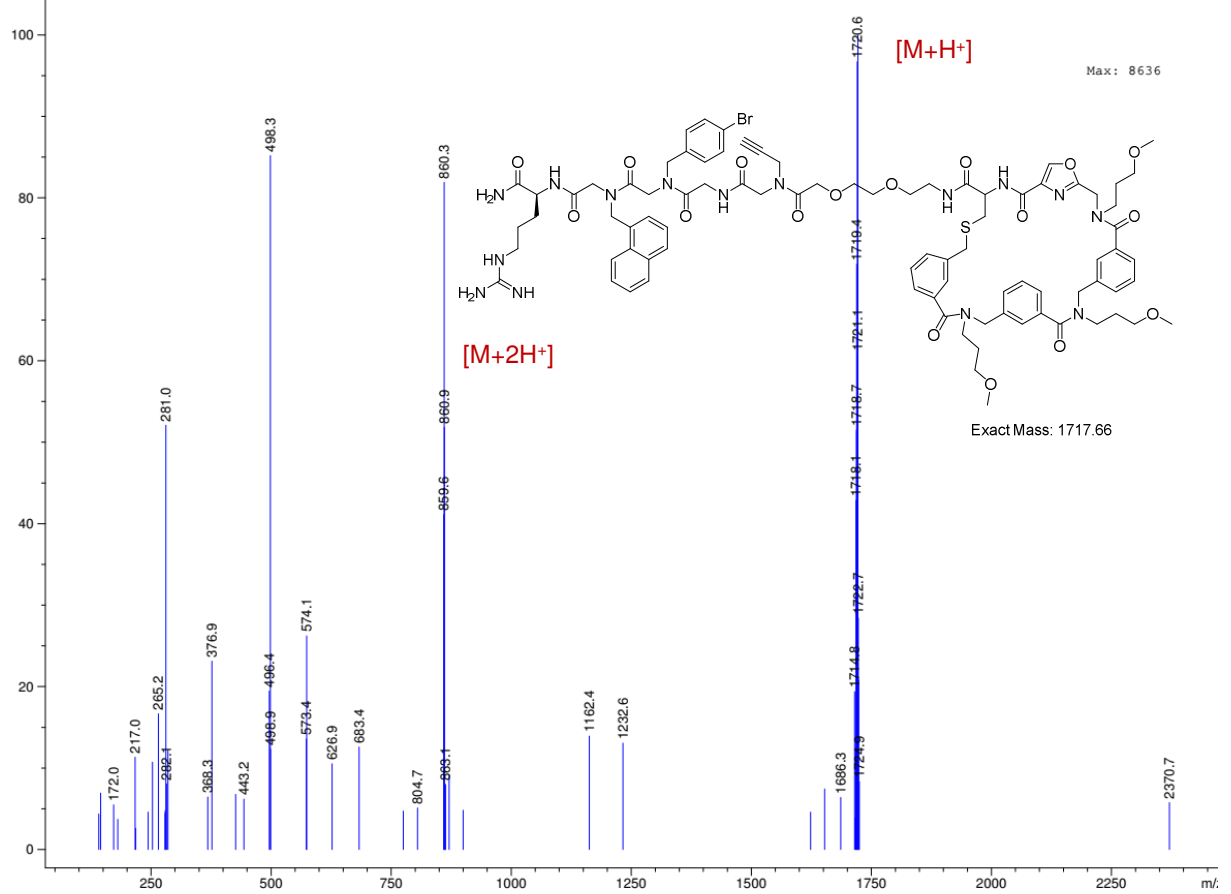

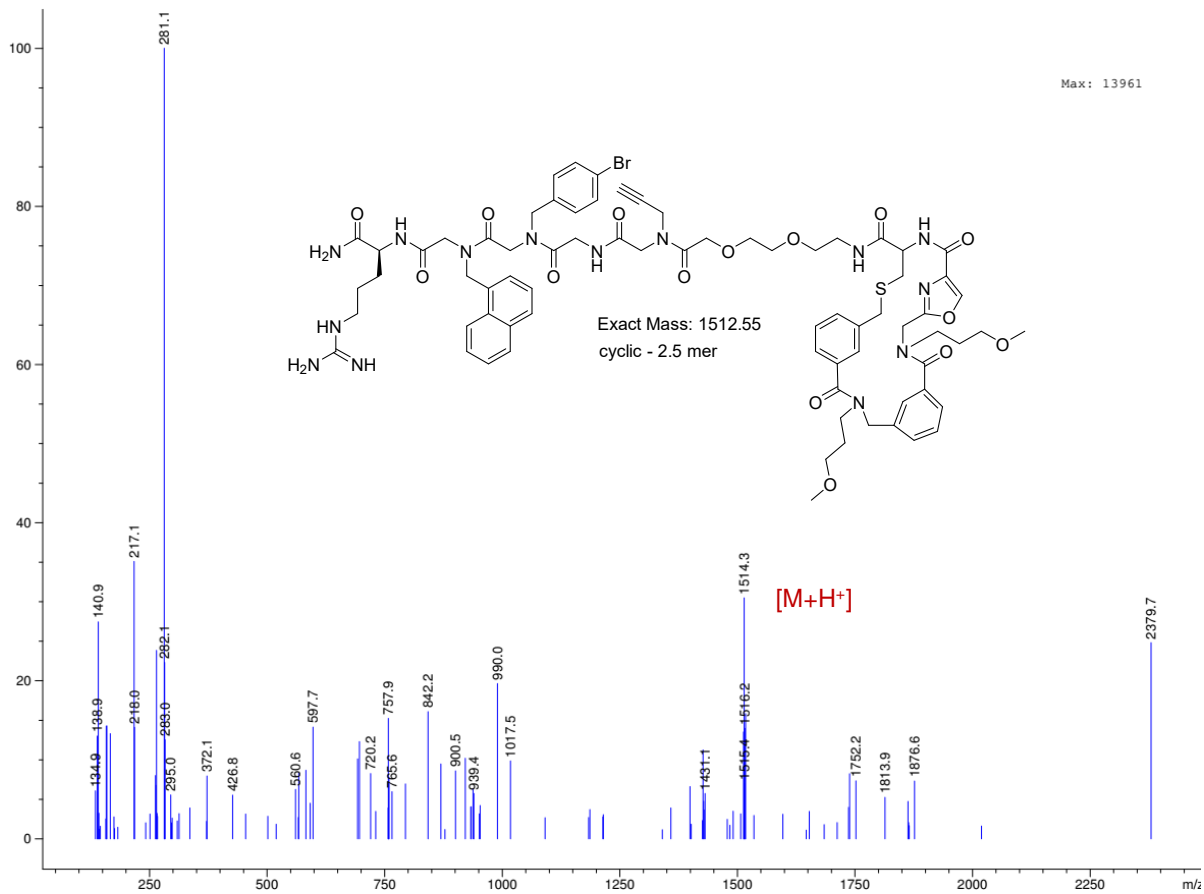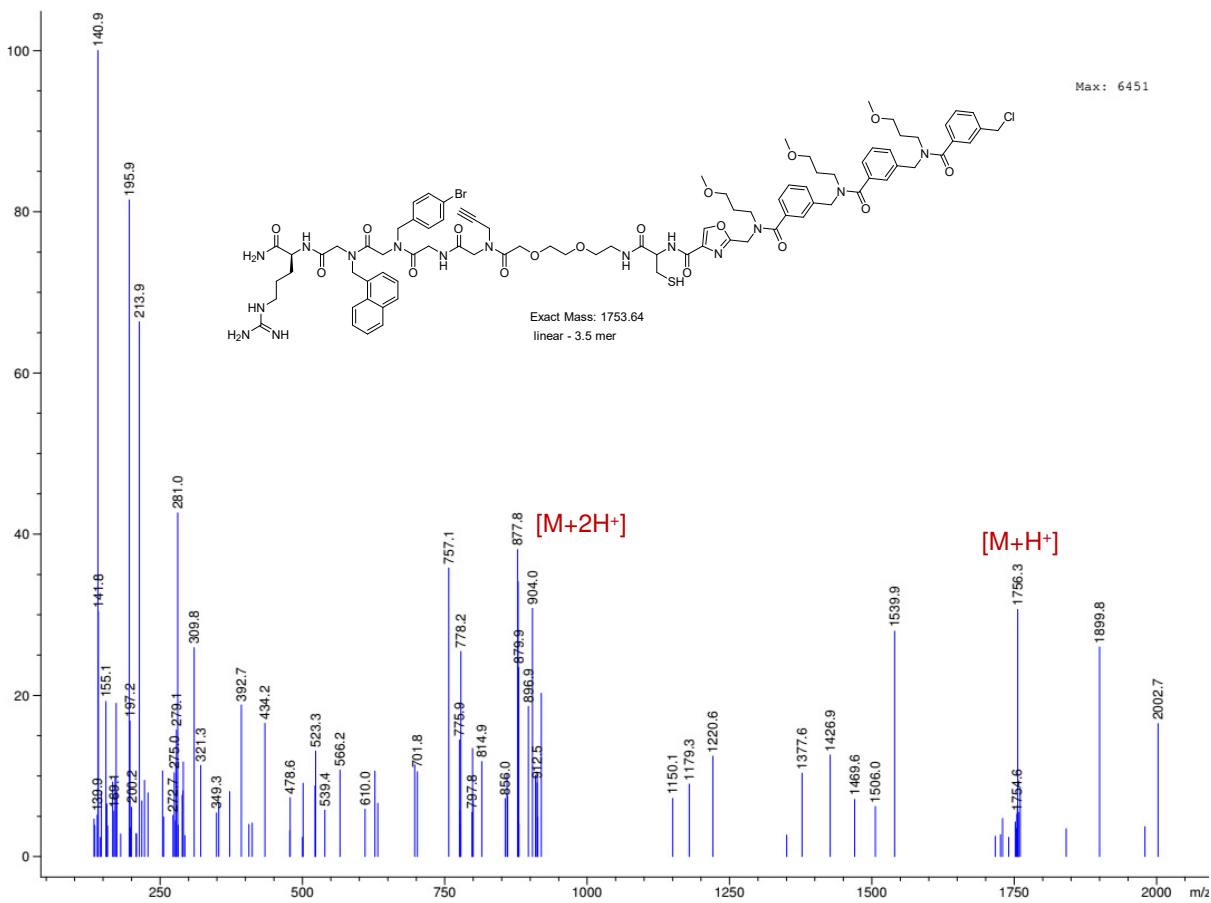



**K2-[ABA]:** Complete cyclization was observed on 10 μm & 160 μm beads.

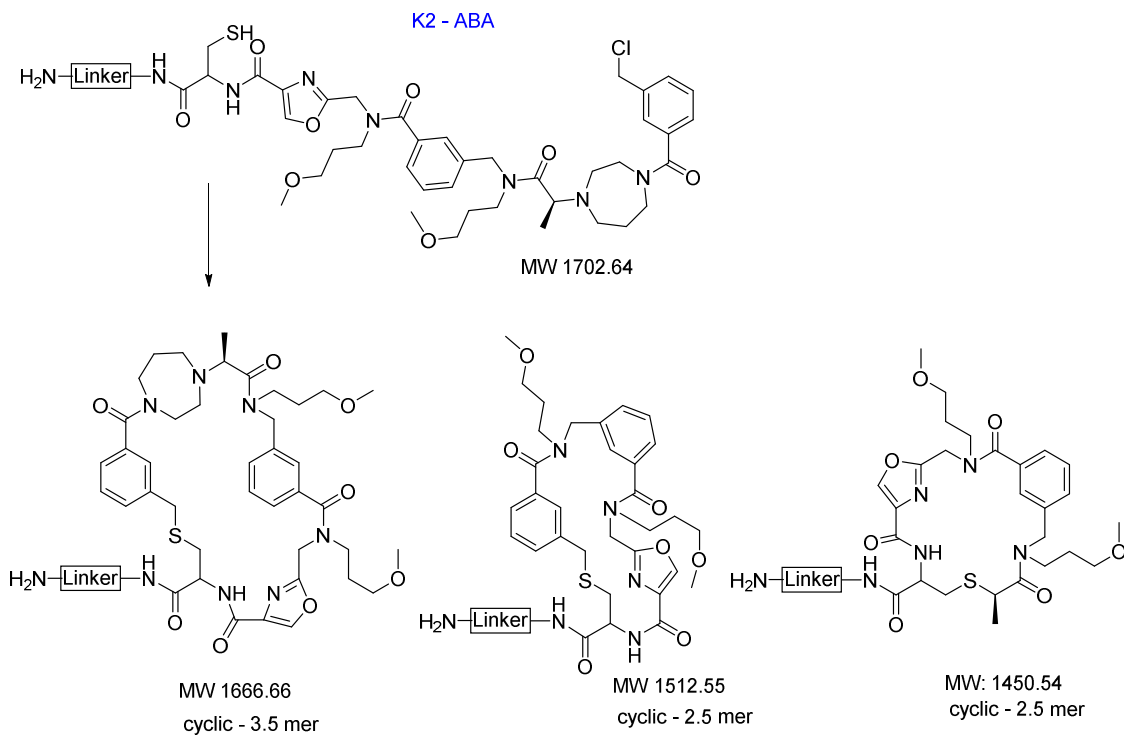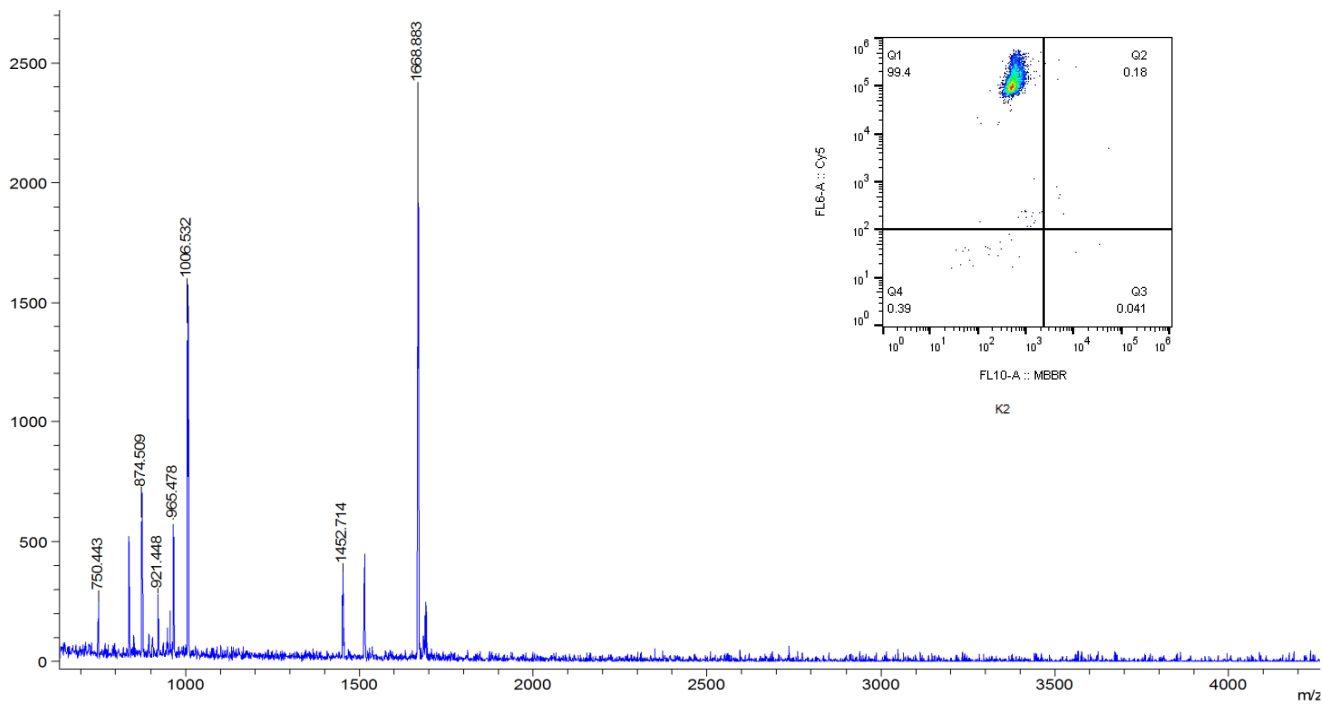

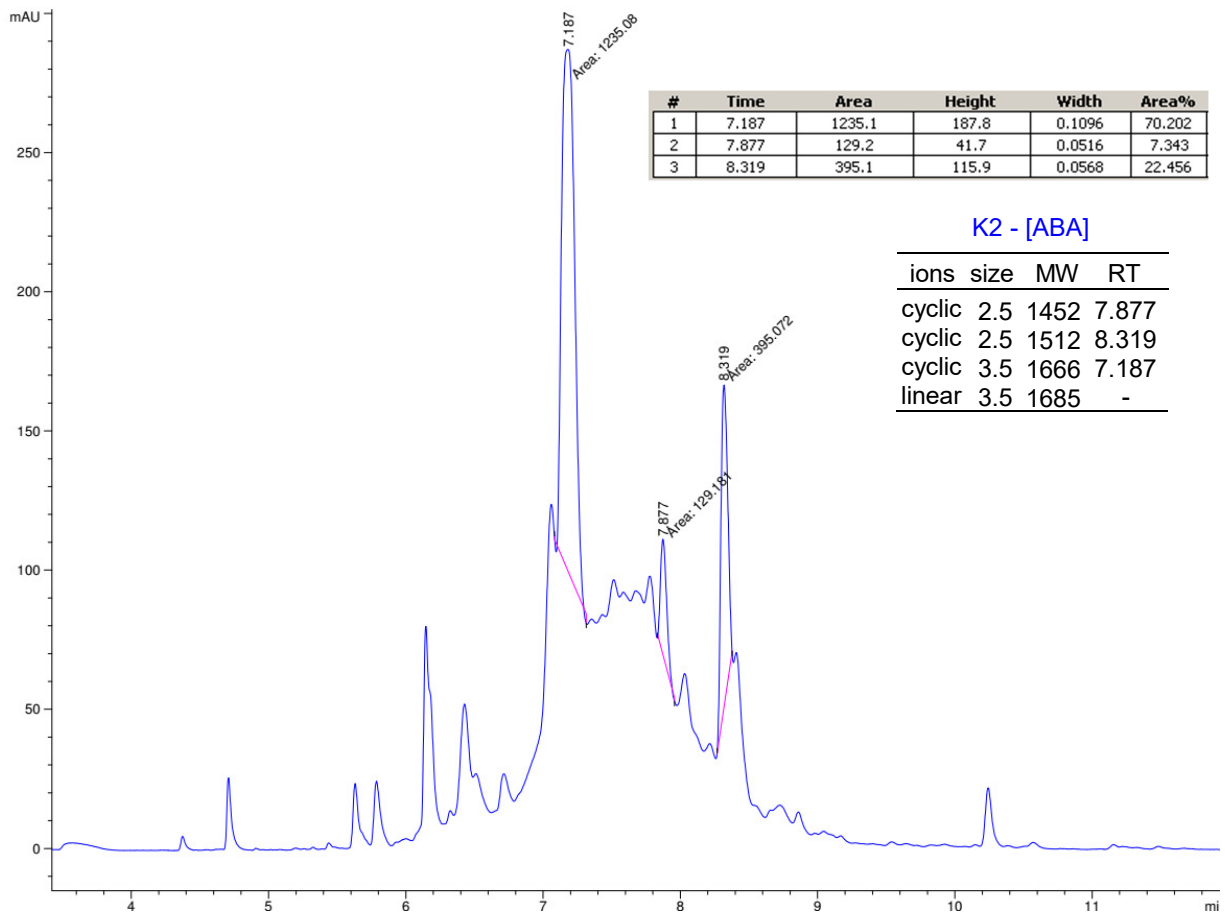

**K2 - [ABA]**

|        | ions | size | MW    | RT |
|--------|------|------|-------|----|
| cyclic | 2.5  | 1452 | 7.877 |    |
| cyclic | 2.5  | 1512 | 8.319 |    |
| cyclic | 3.5  | 1666 | 7.187 |    |
| linear | 3.5  | 1685 | -     |    |

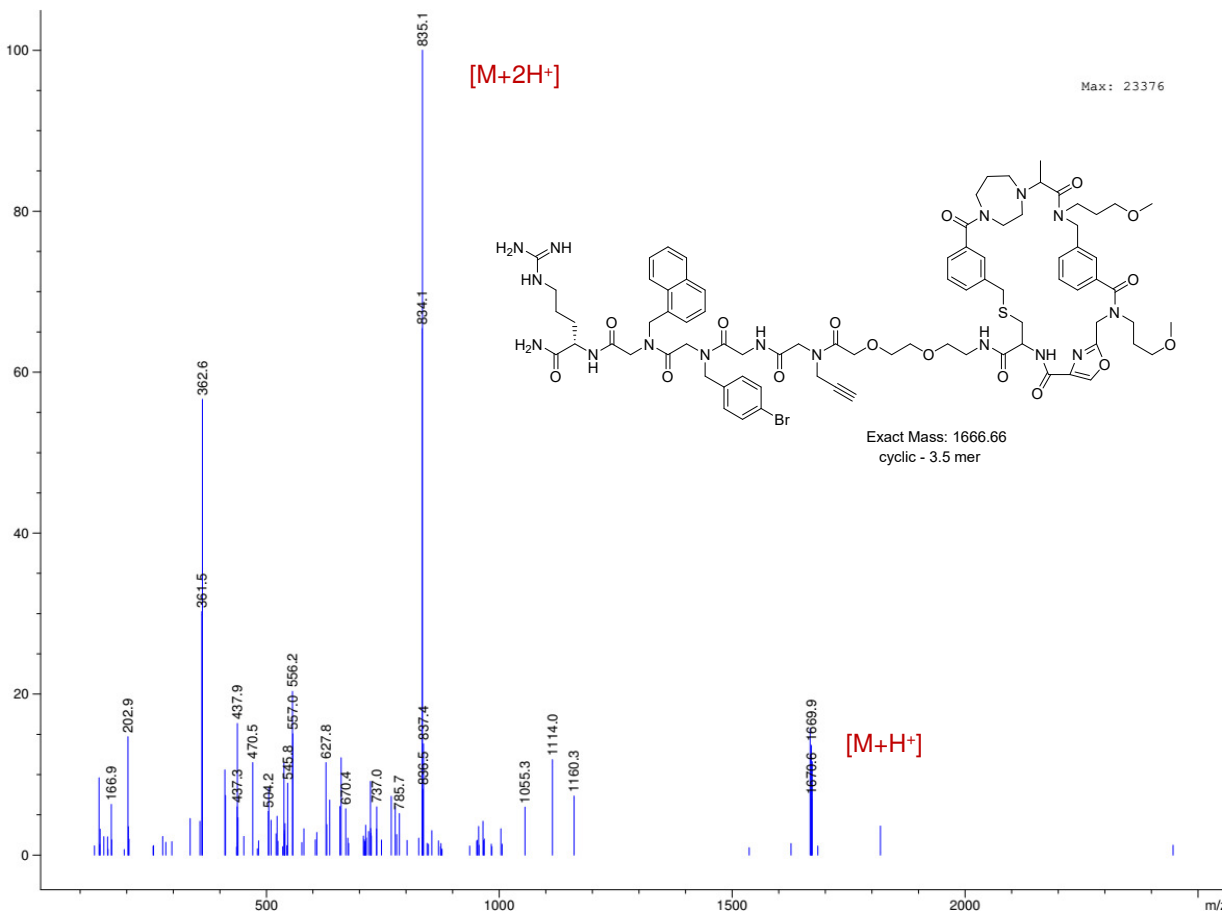

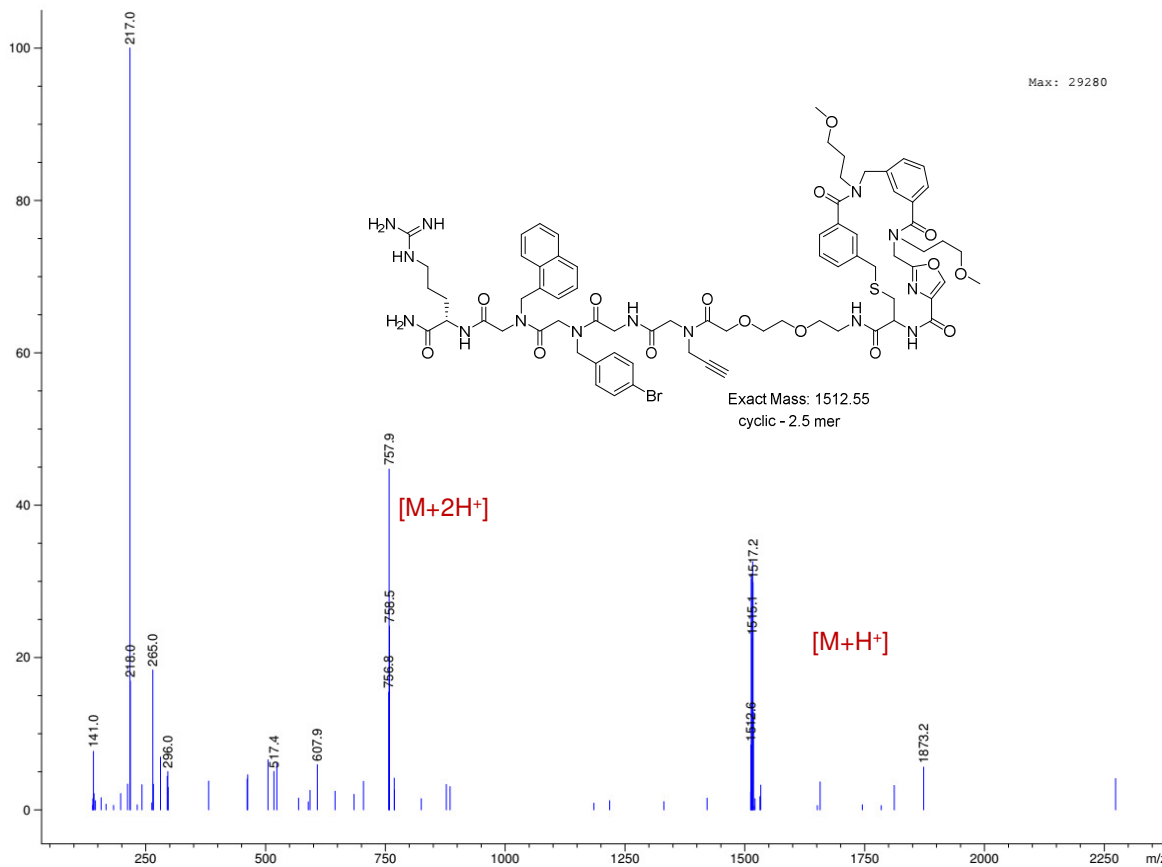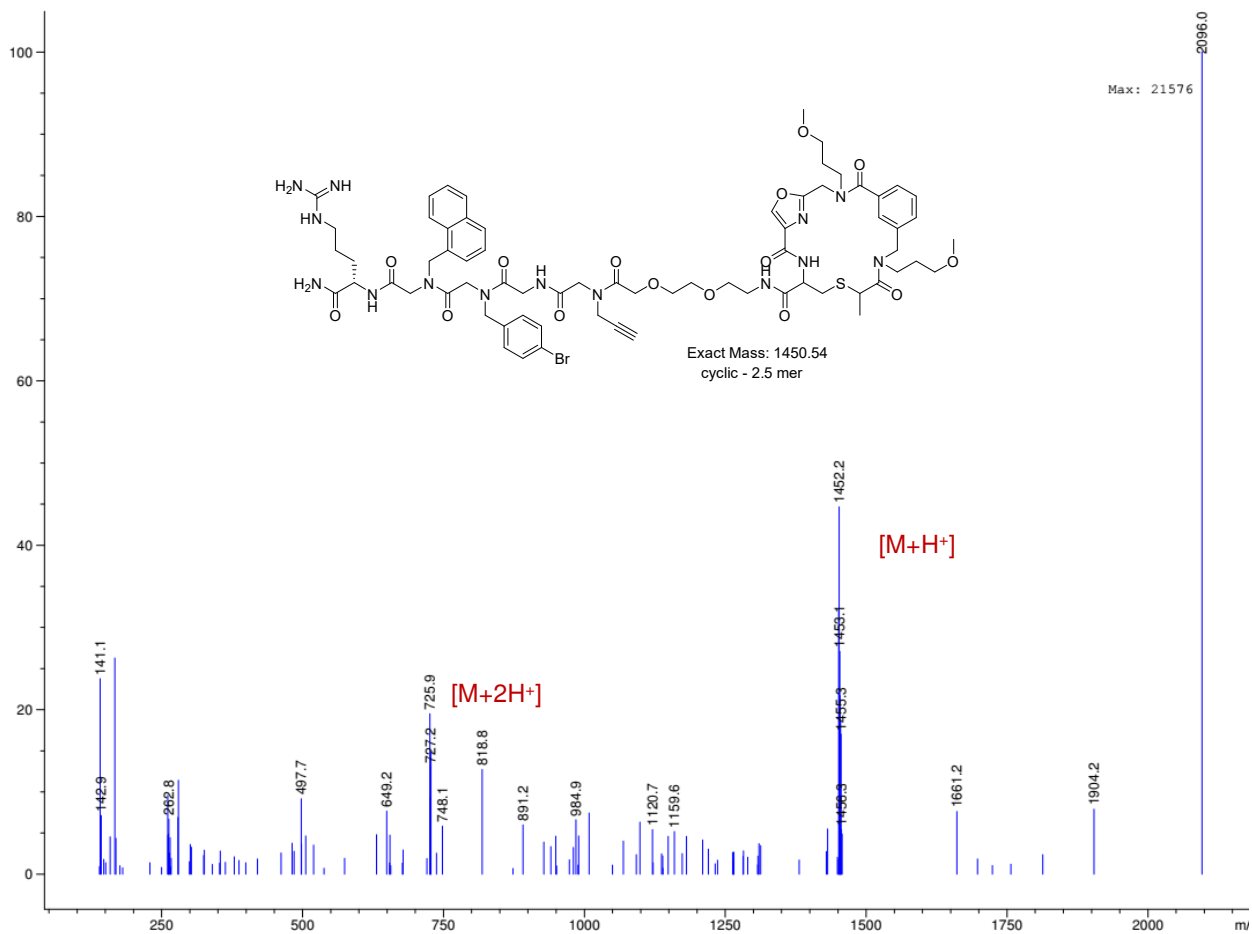

**K3-[ACA]:** Incomplete cyclization was observed on both 10  $\mu$ m and 160  $\mu$ m beads.

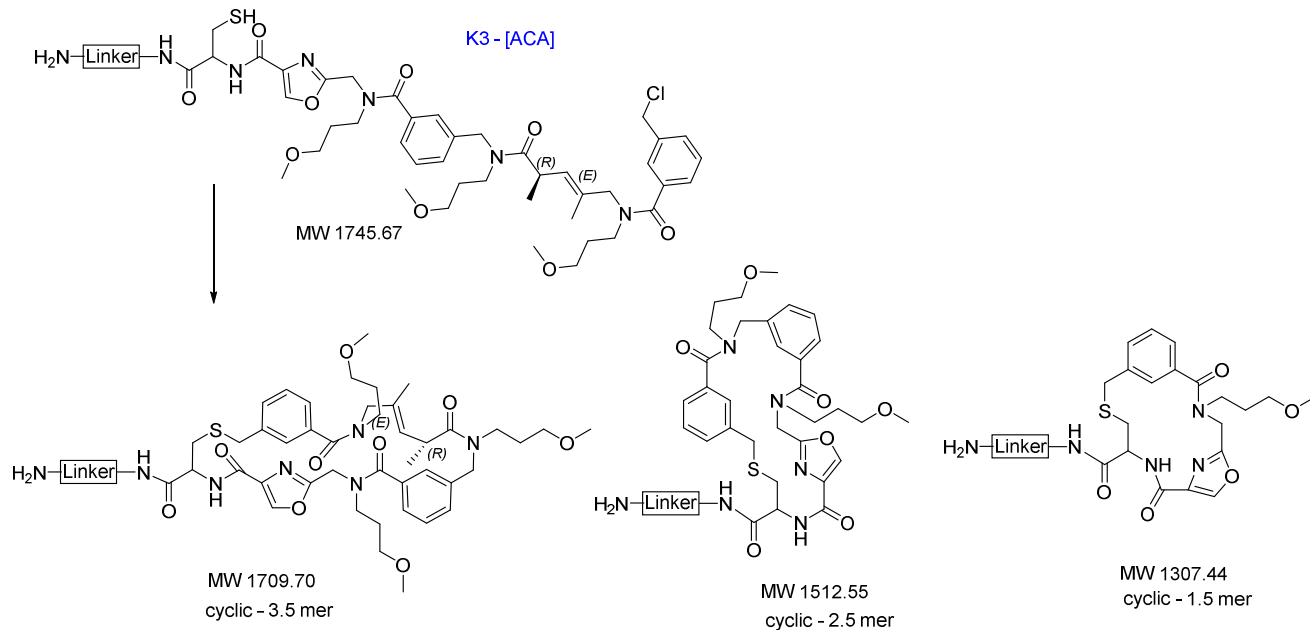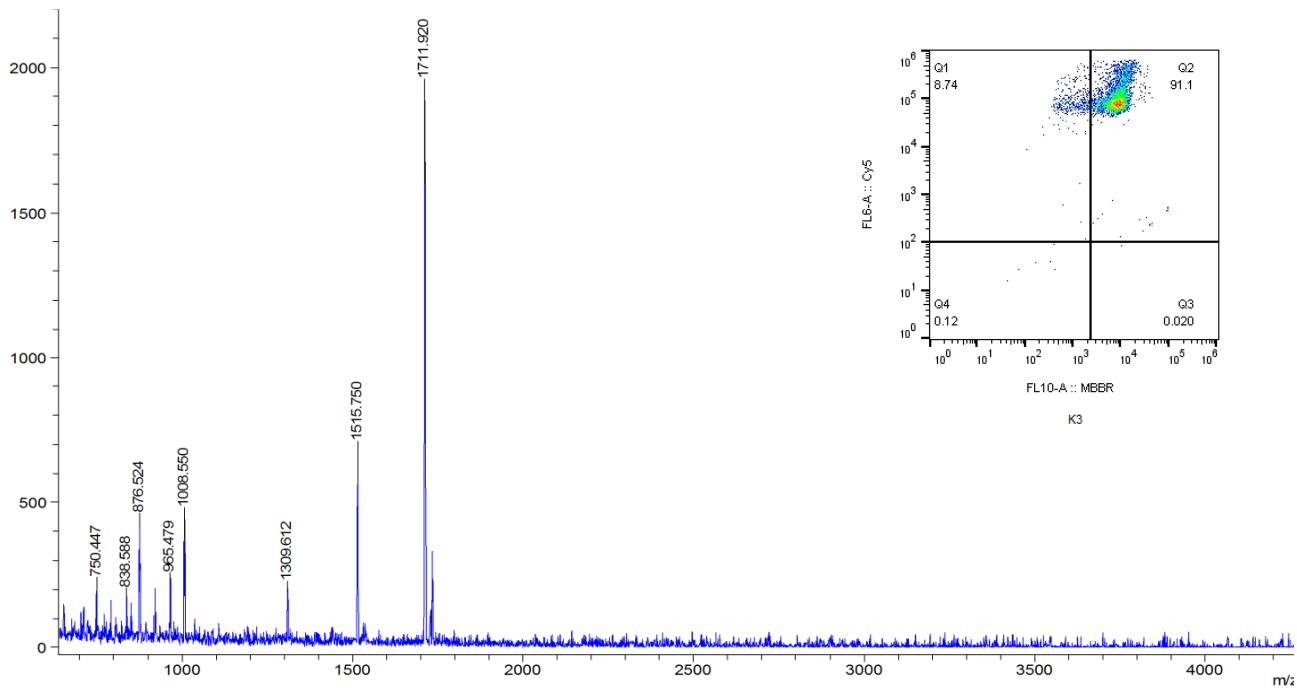

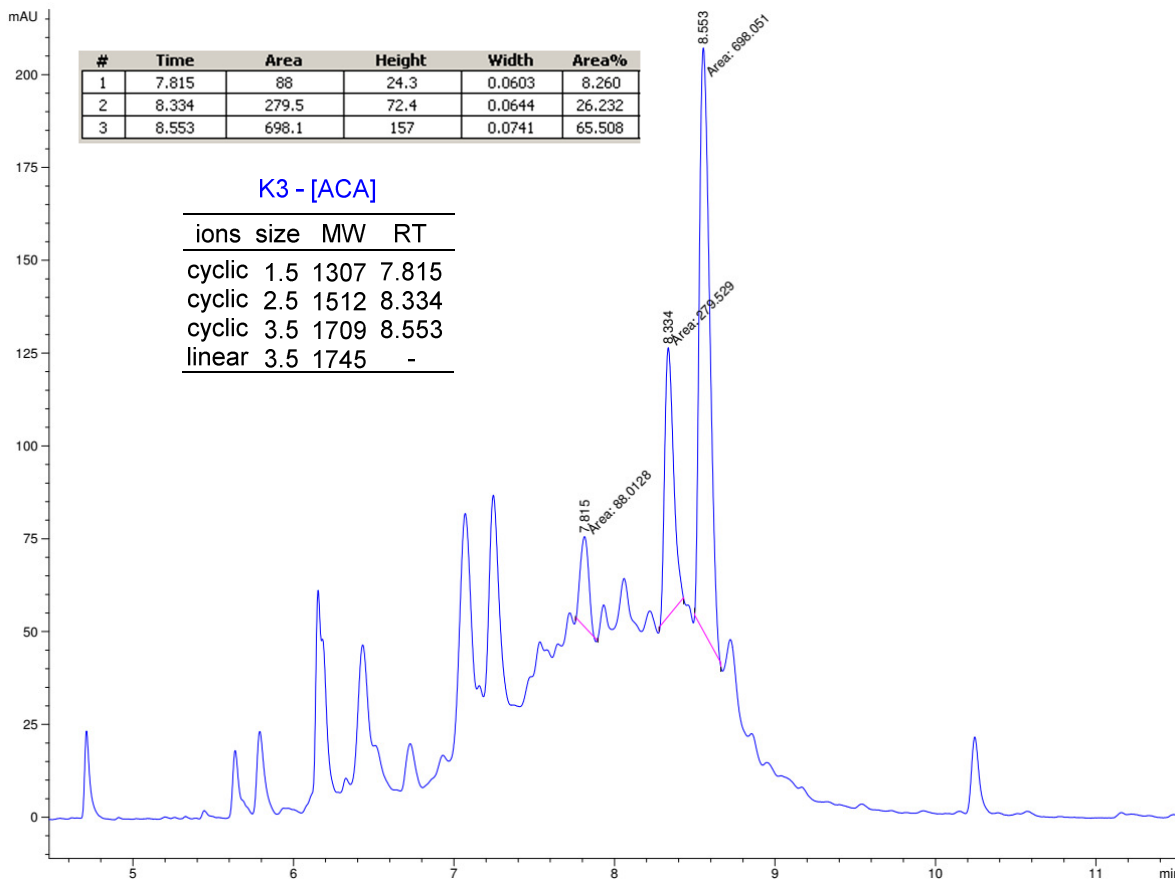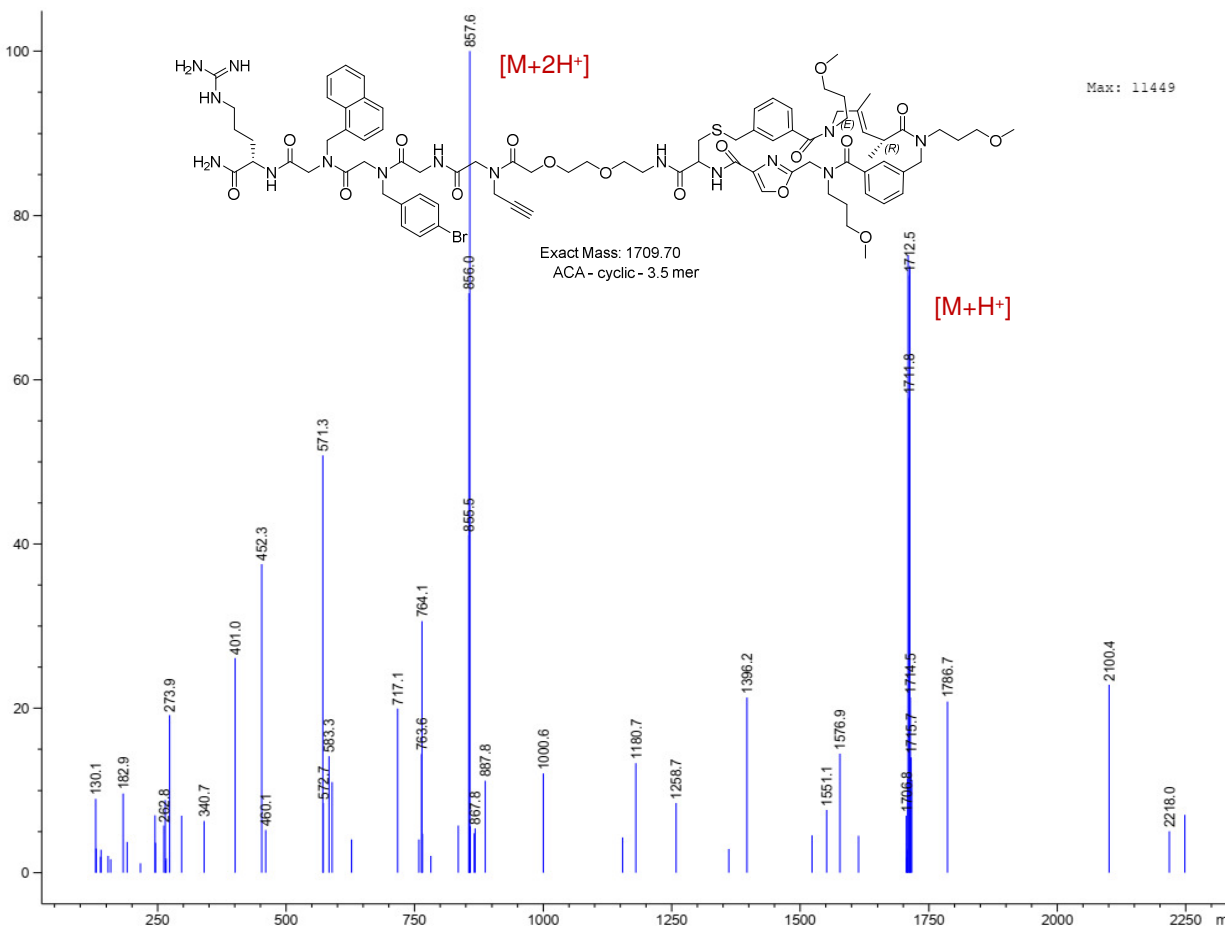

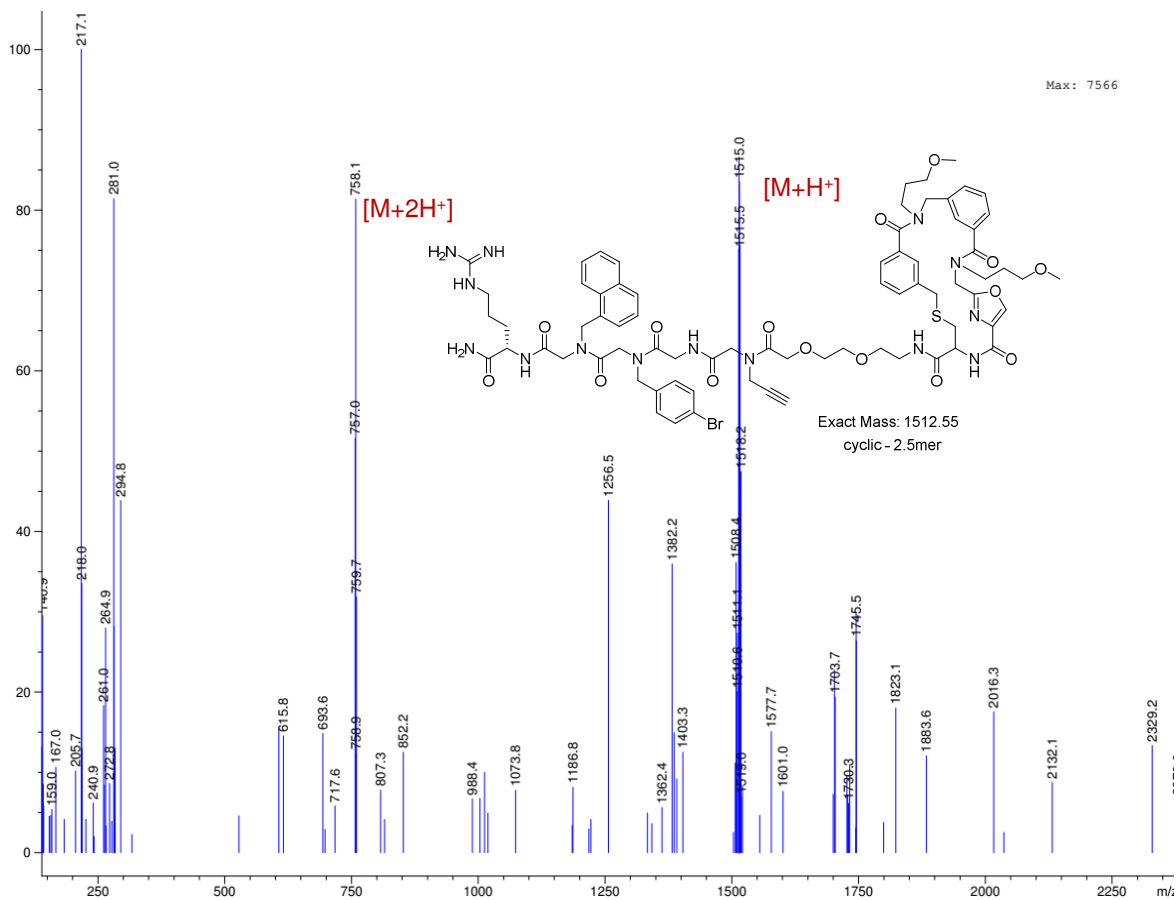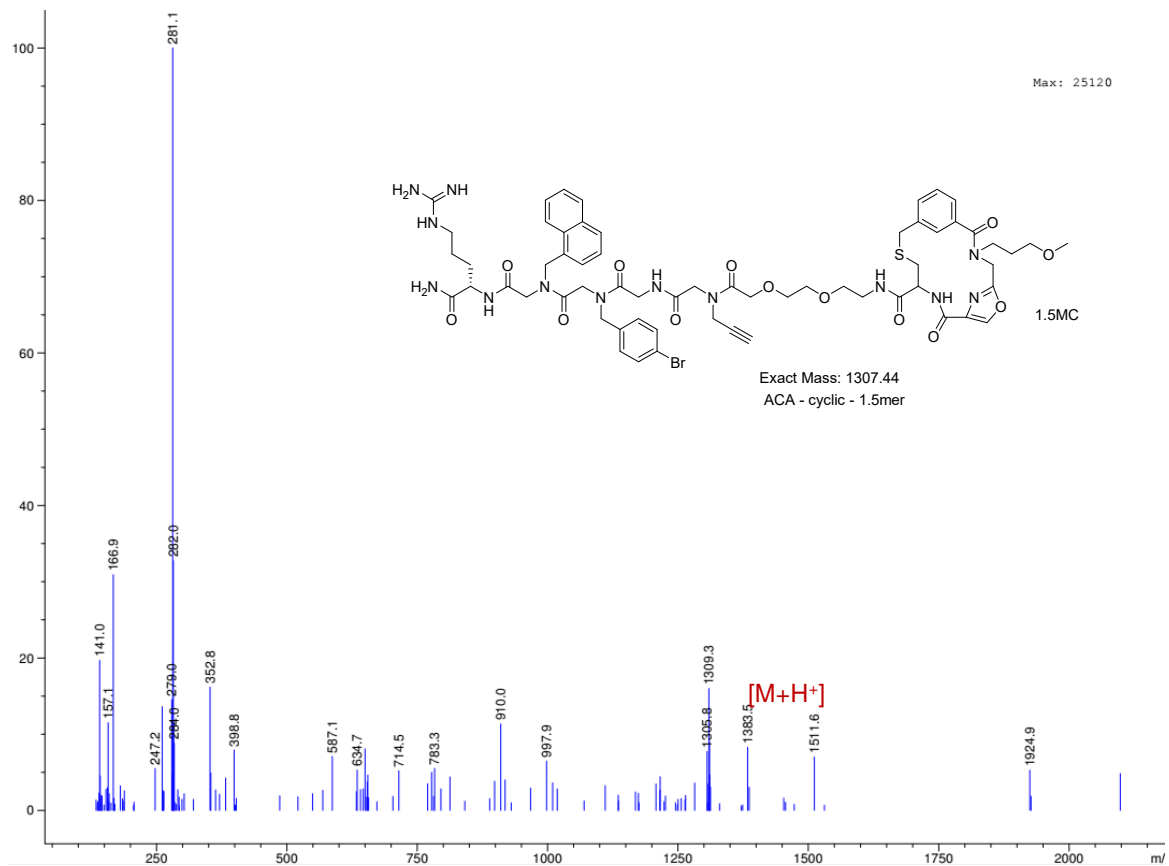

**K4-[ADA]:** Complete cyclization was observed 10  $\mu\text{m}$  & 160  $\mu\text{m}$  beads.

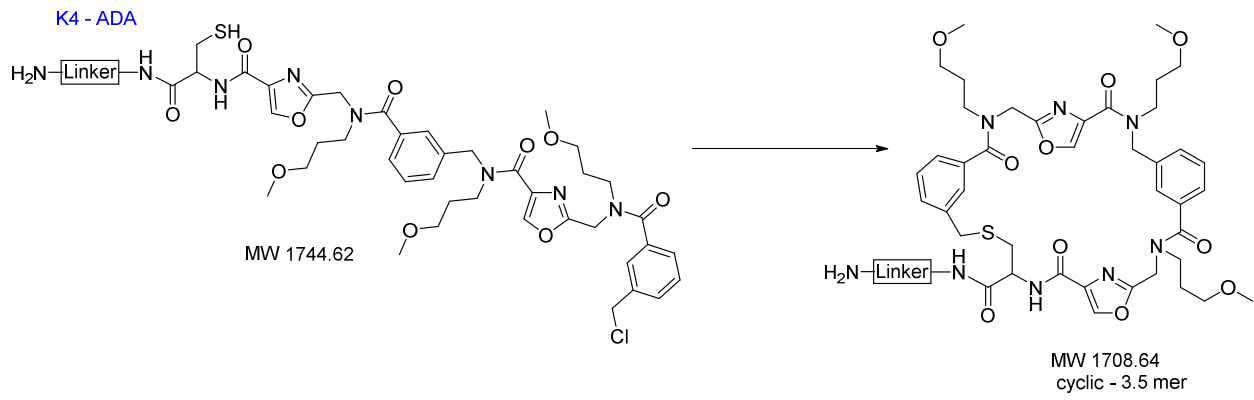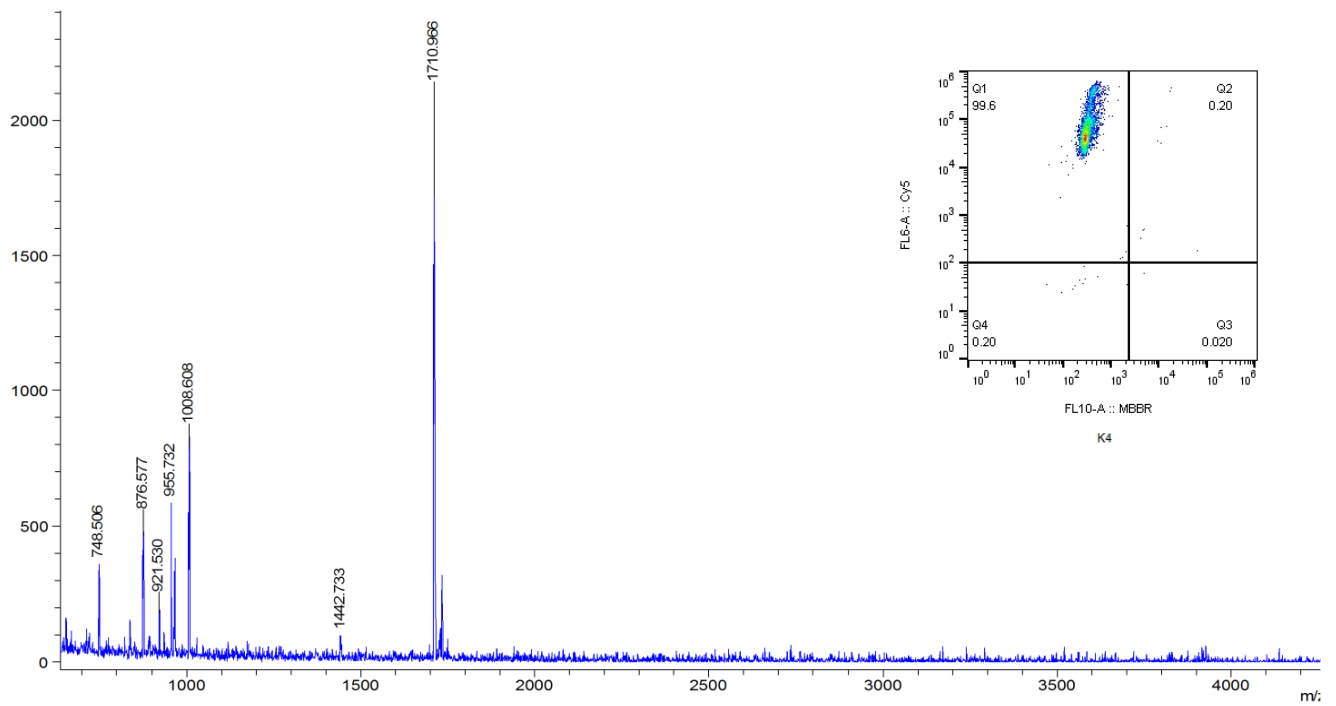

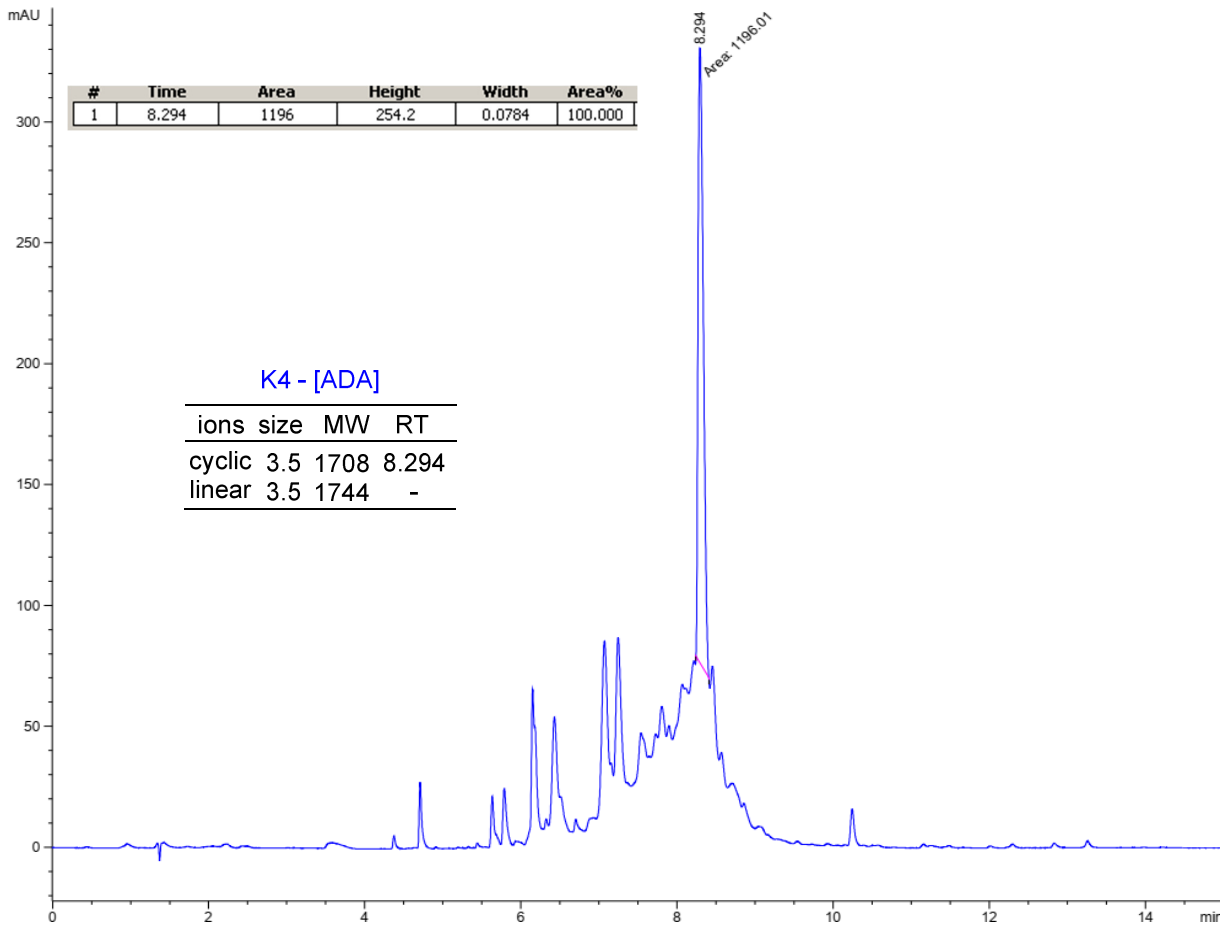

**K4 - [ADA]**

| ions size | MW       | RT    |
|-----------|----------|-------|
| cyclic    | 3.5 1708 | 8.294 |
| linear    | 3.5 1744 | -     |

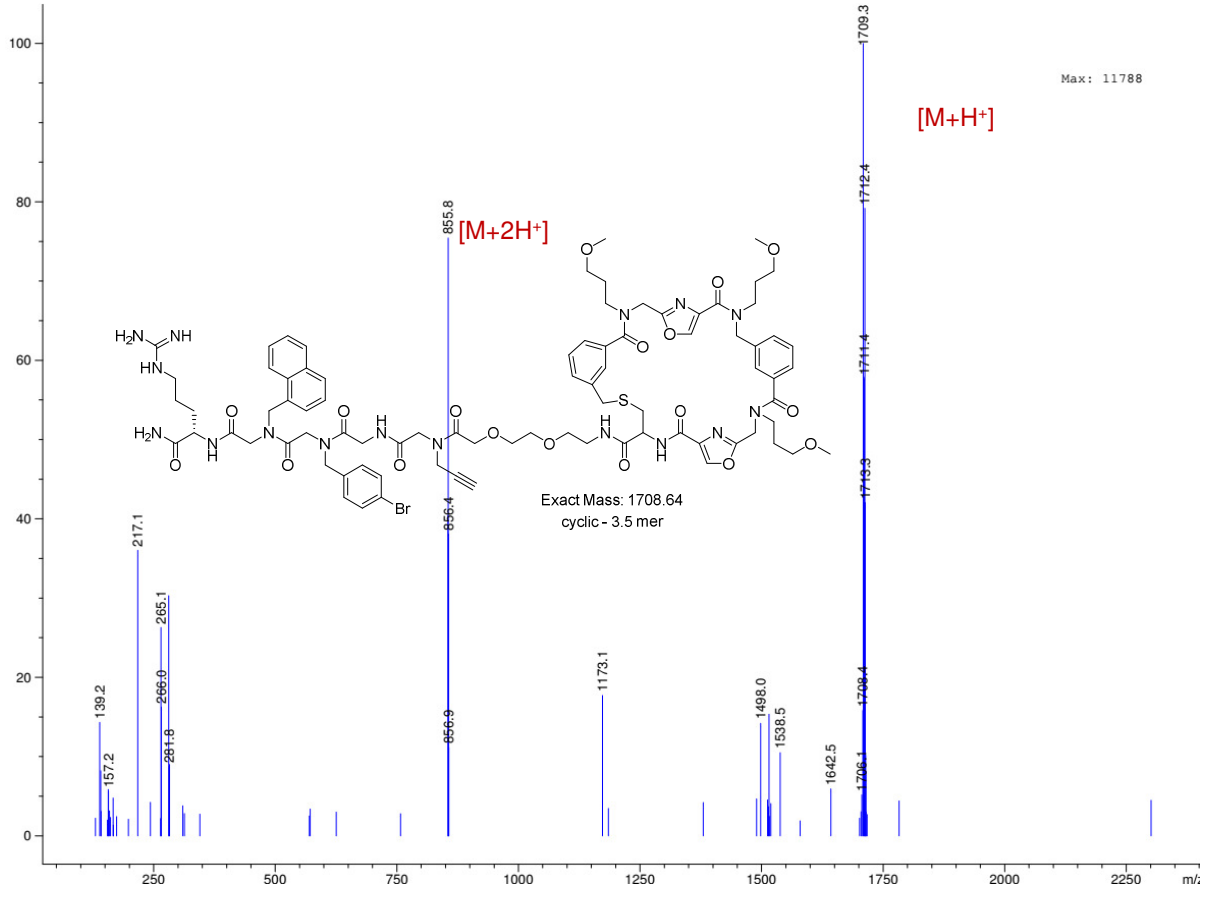



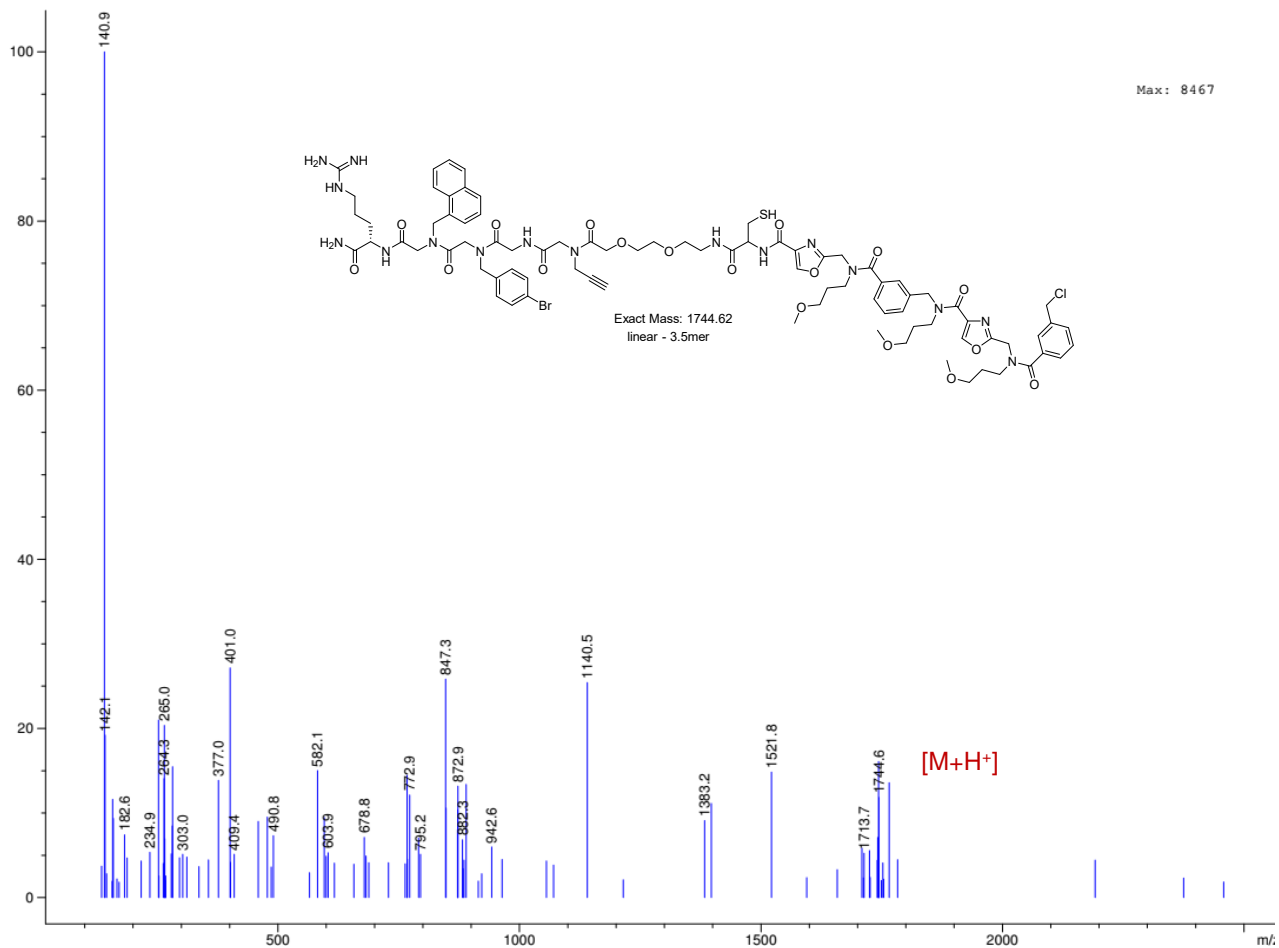

**K7-[AAB]:** Incomplete cyclization was observed on 10  $\mu\text{m}$  but was complete on 160  $\mu\text{m}$  beads.

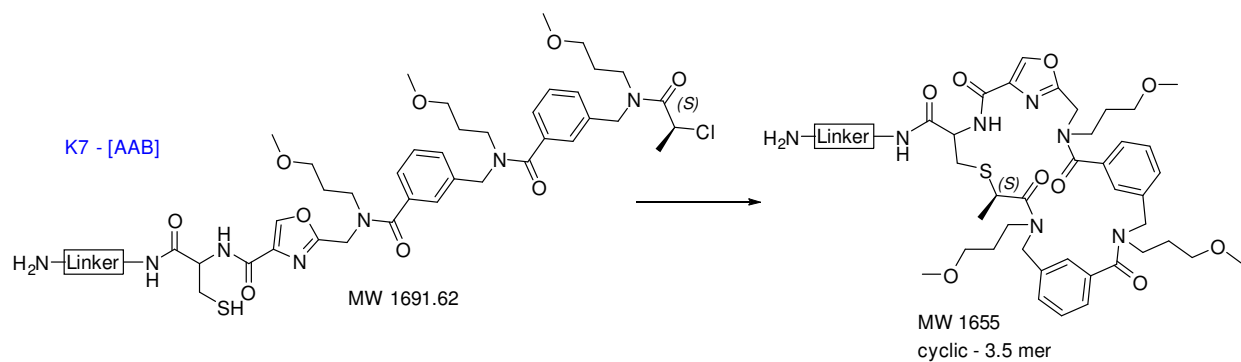

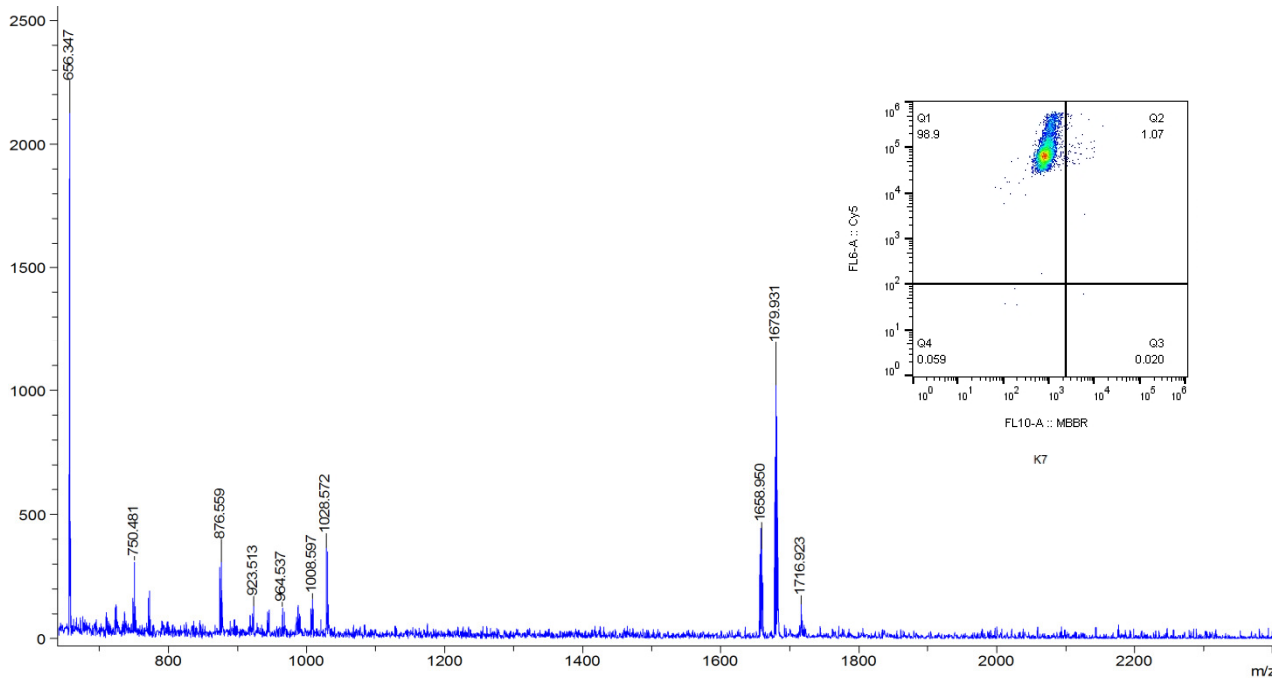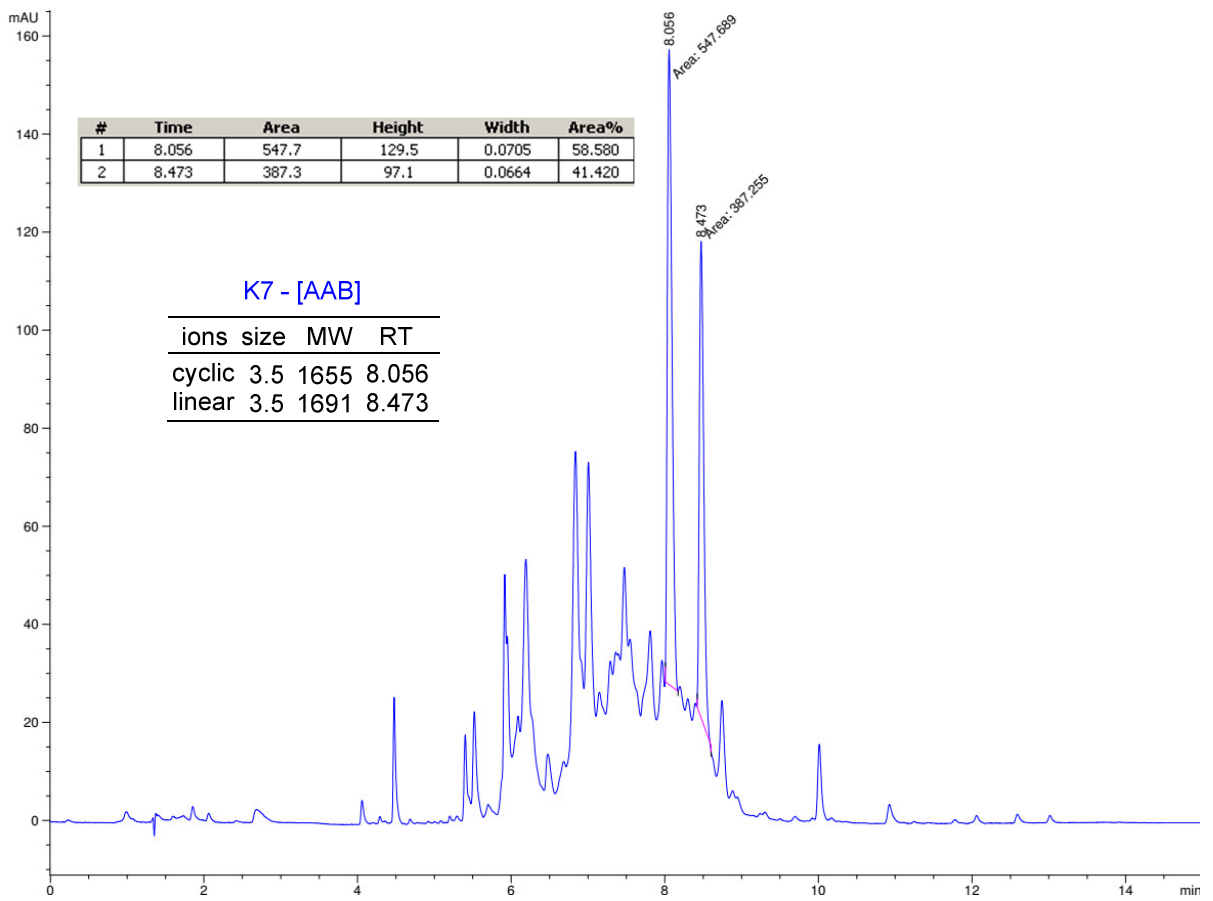



**K8-[ABB]:** Complete cyclization was detected on 10  $\mu\text{m}$  but was incomplete on 160  $\mu\text{m}$  beads.

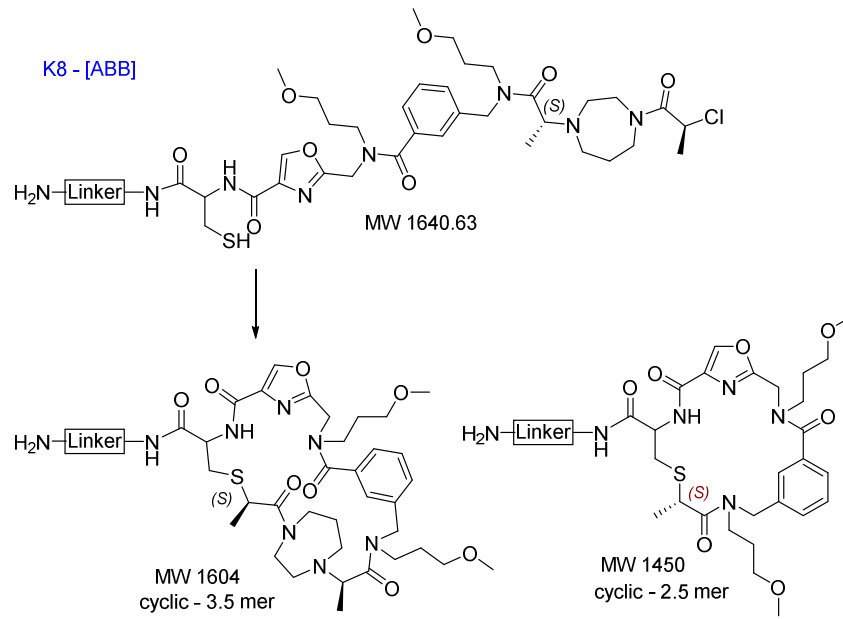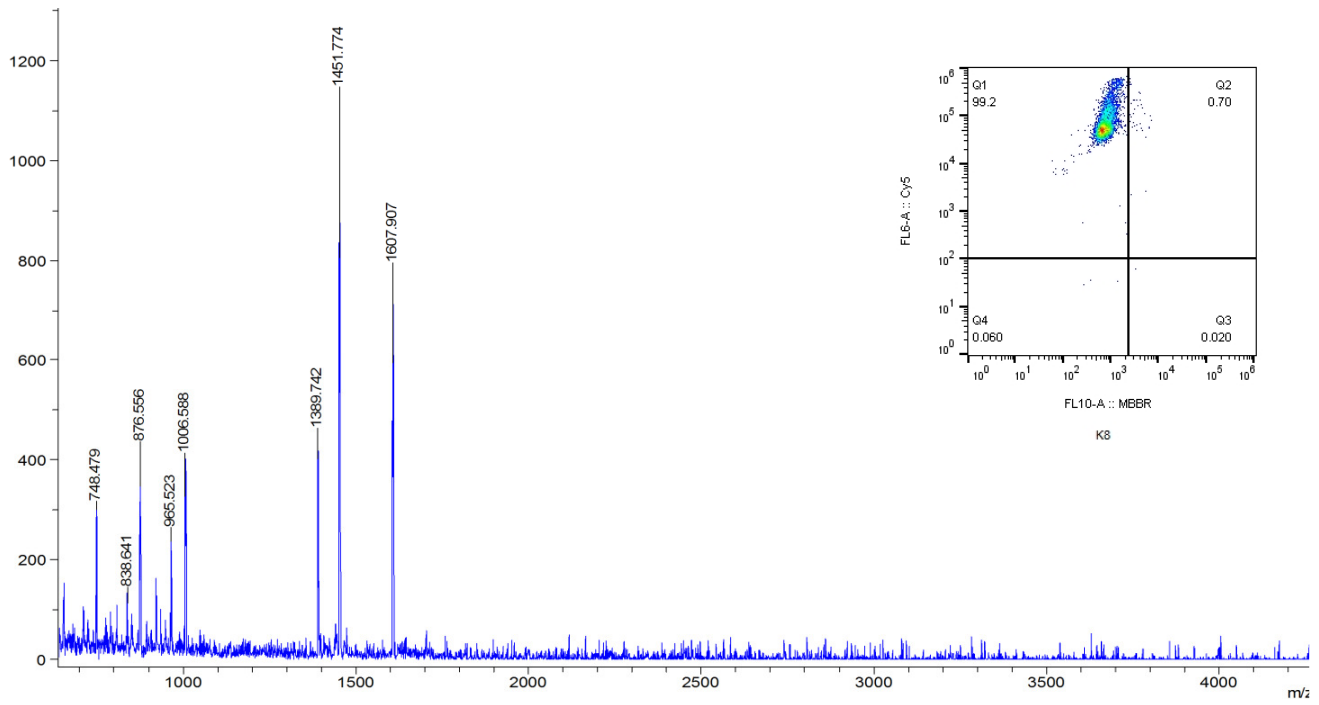

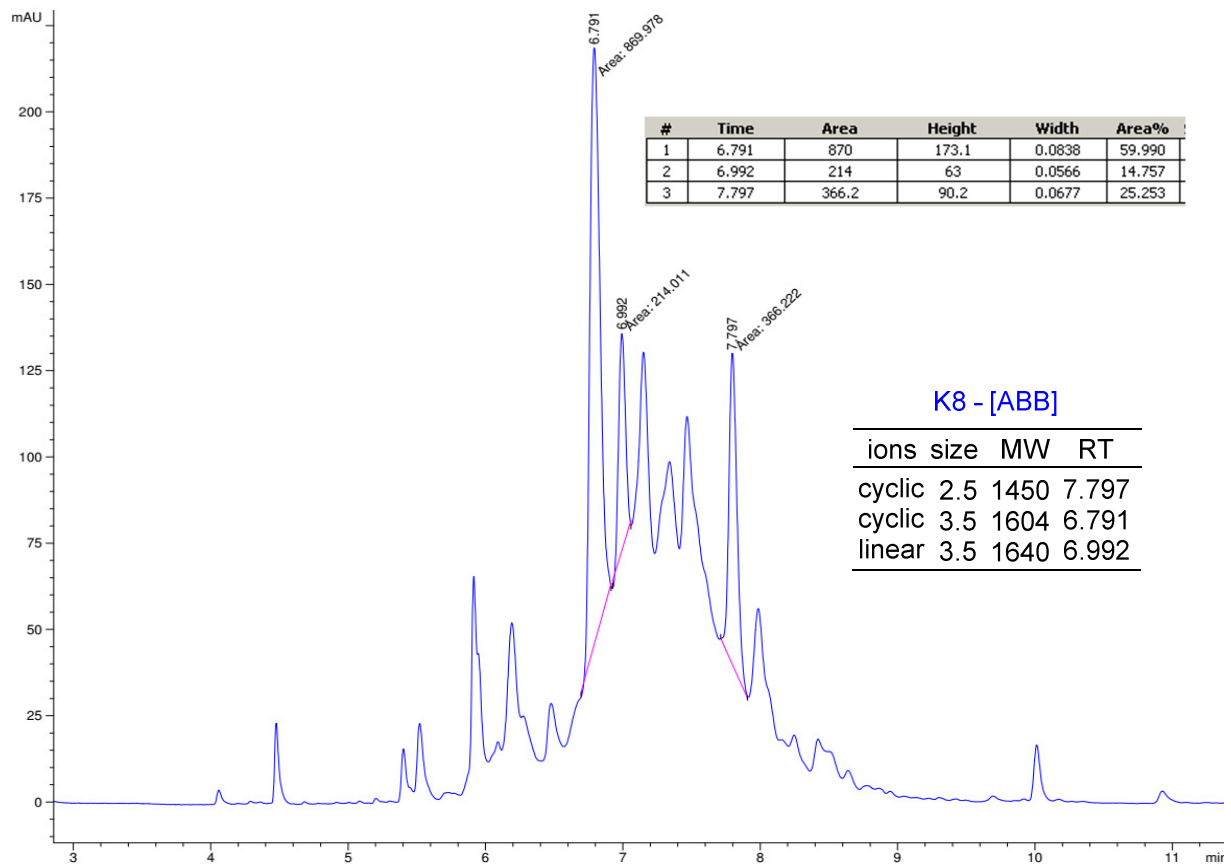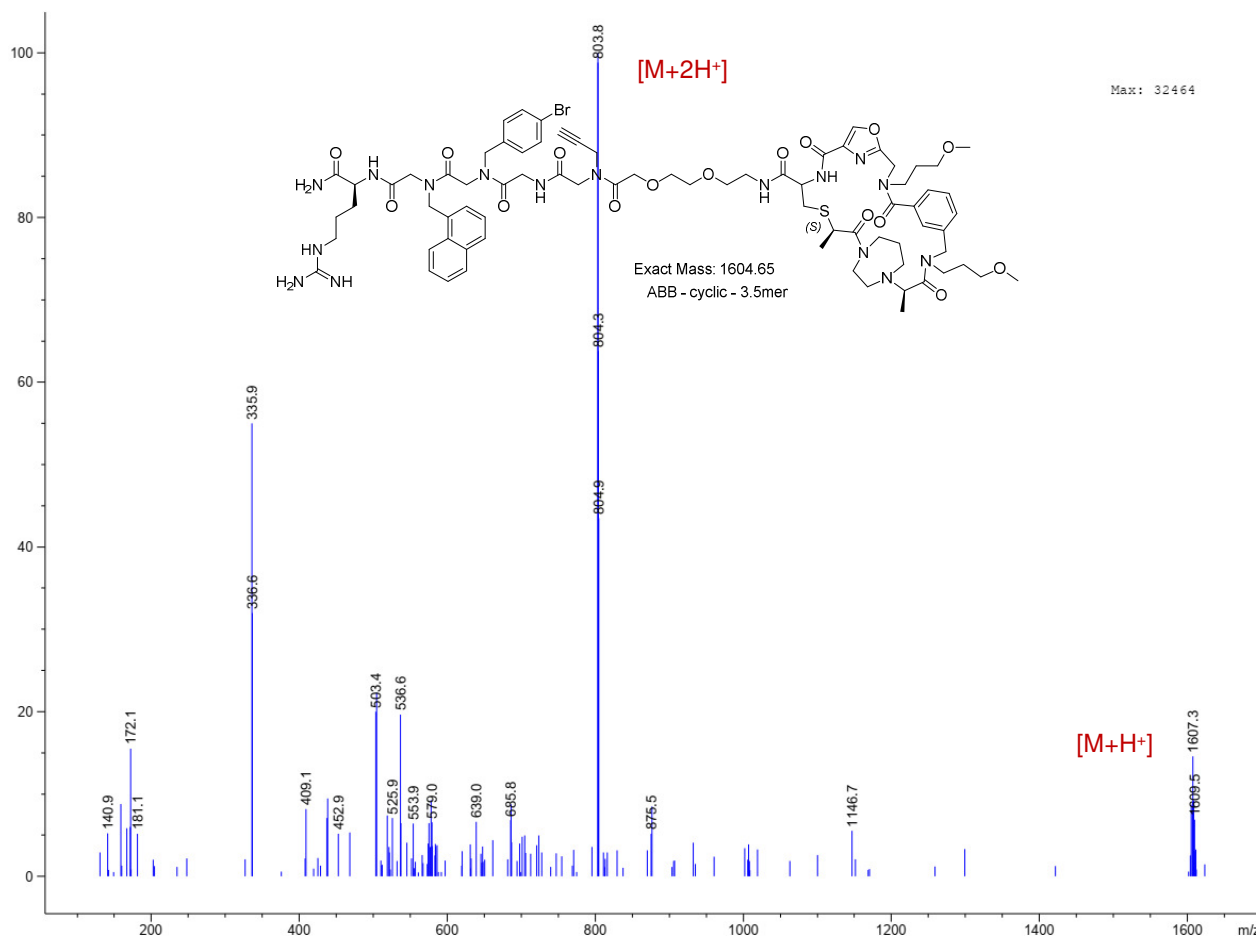

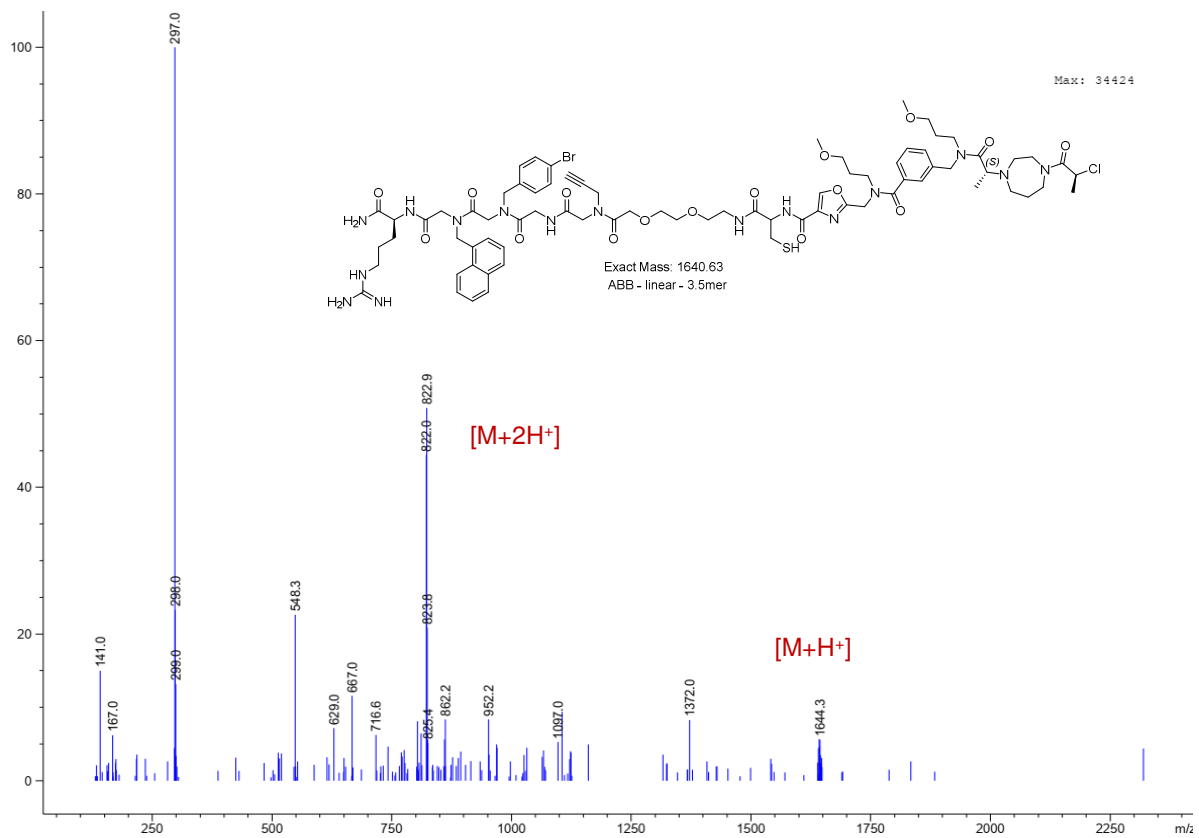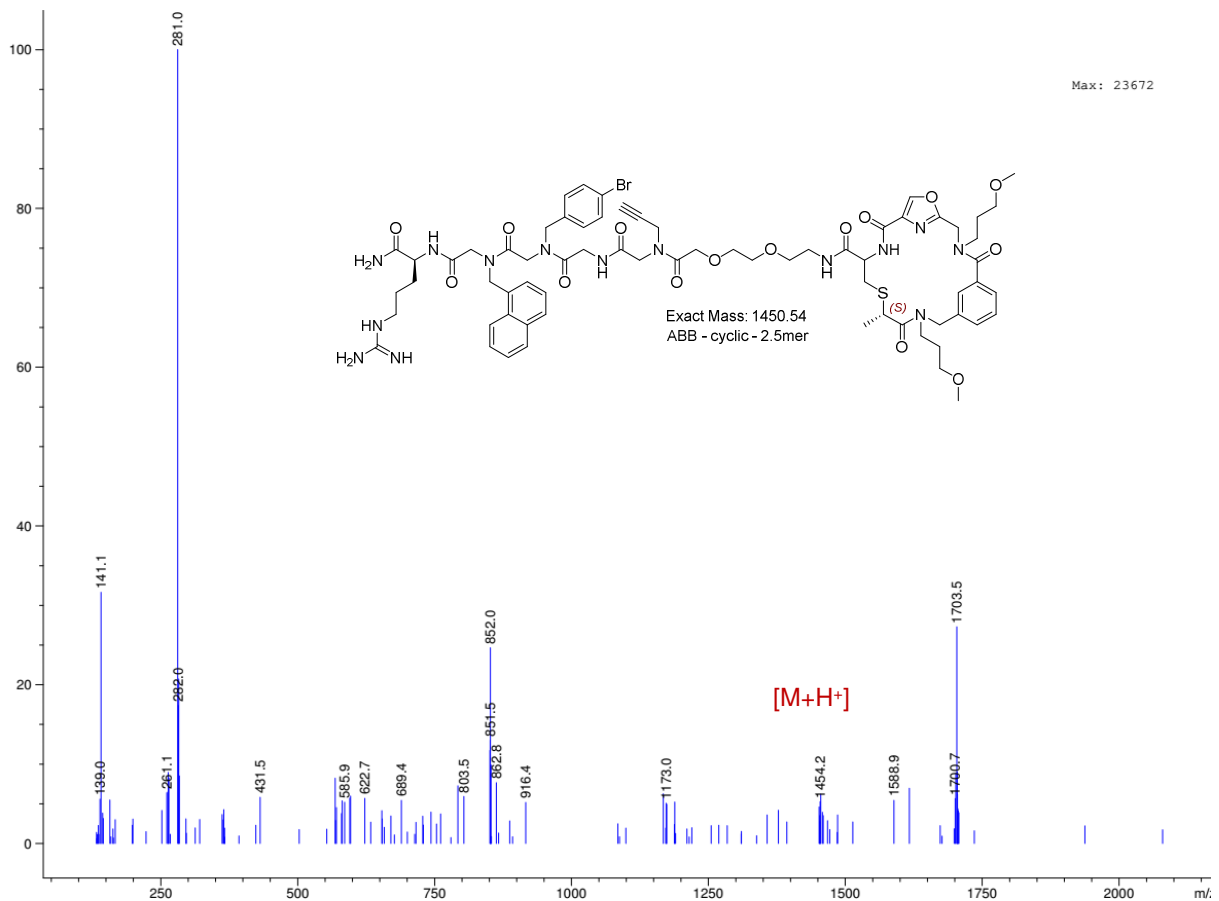

**K9-[ACB]:** Incomplete cyclization was observed on both 10  $\mu\text{m}$  & 160  $\mu\text{m}$ .

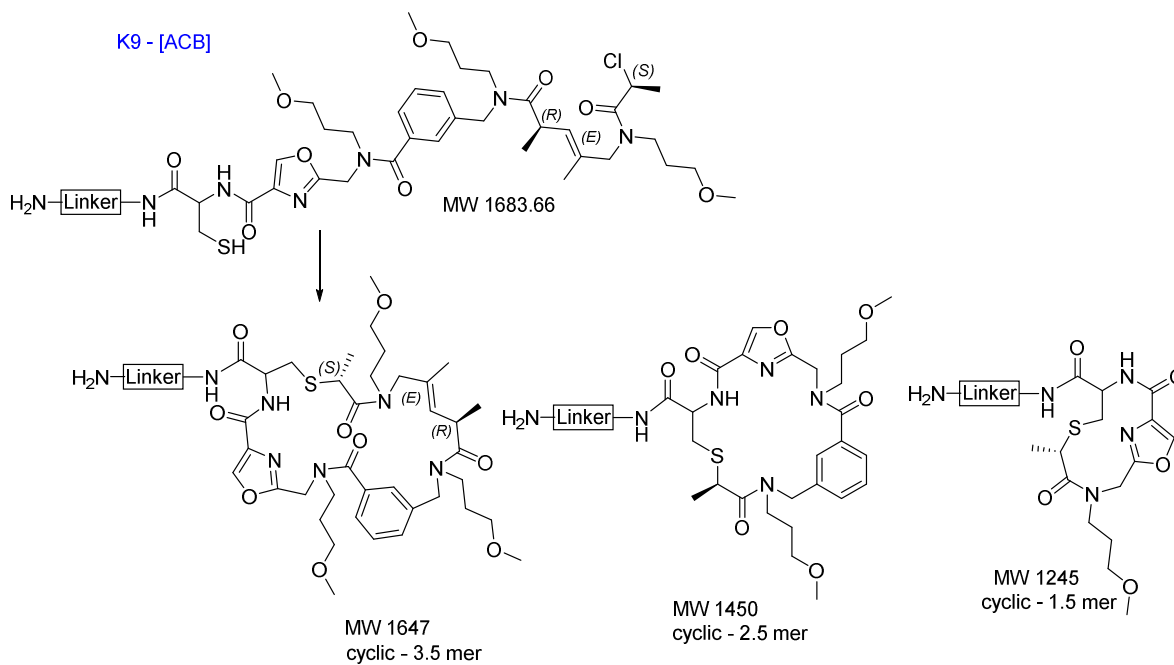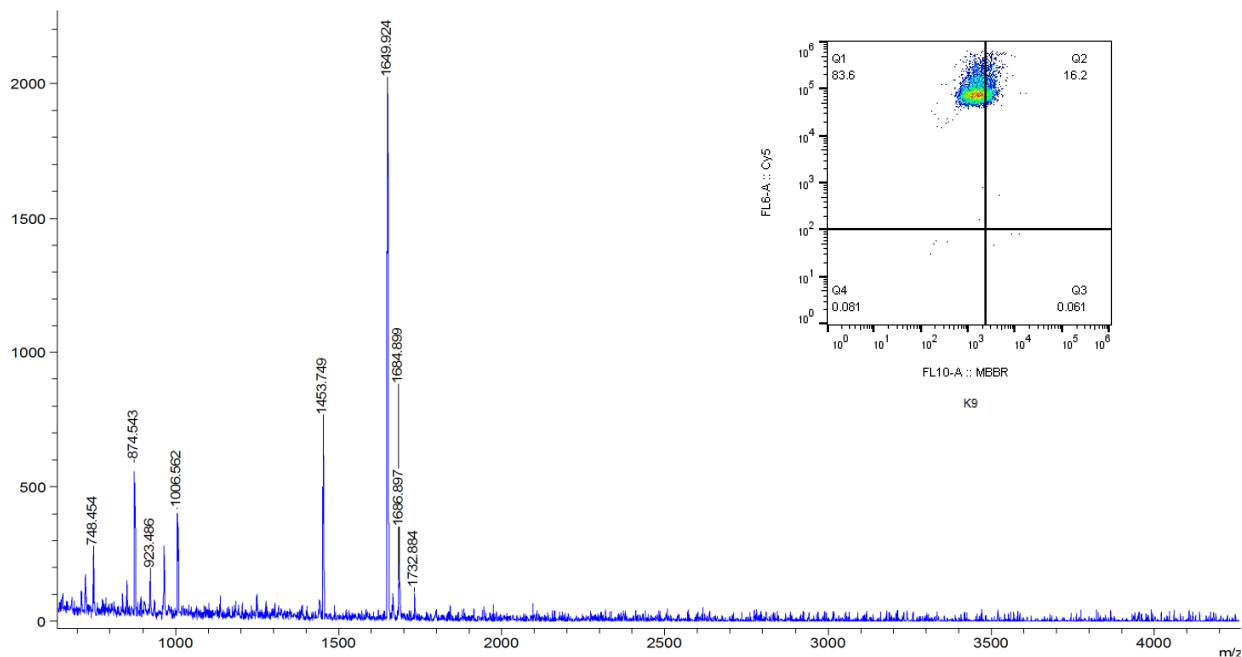

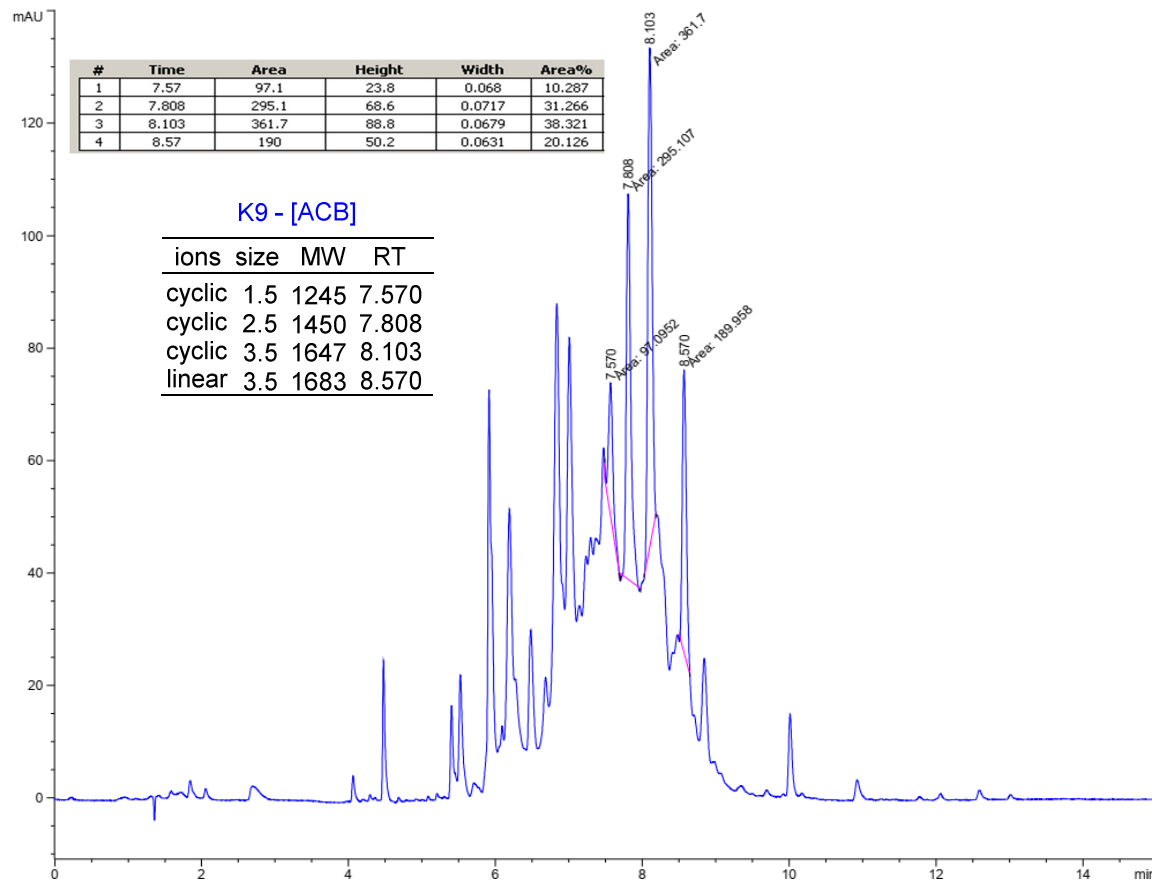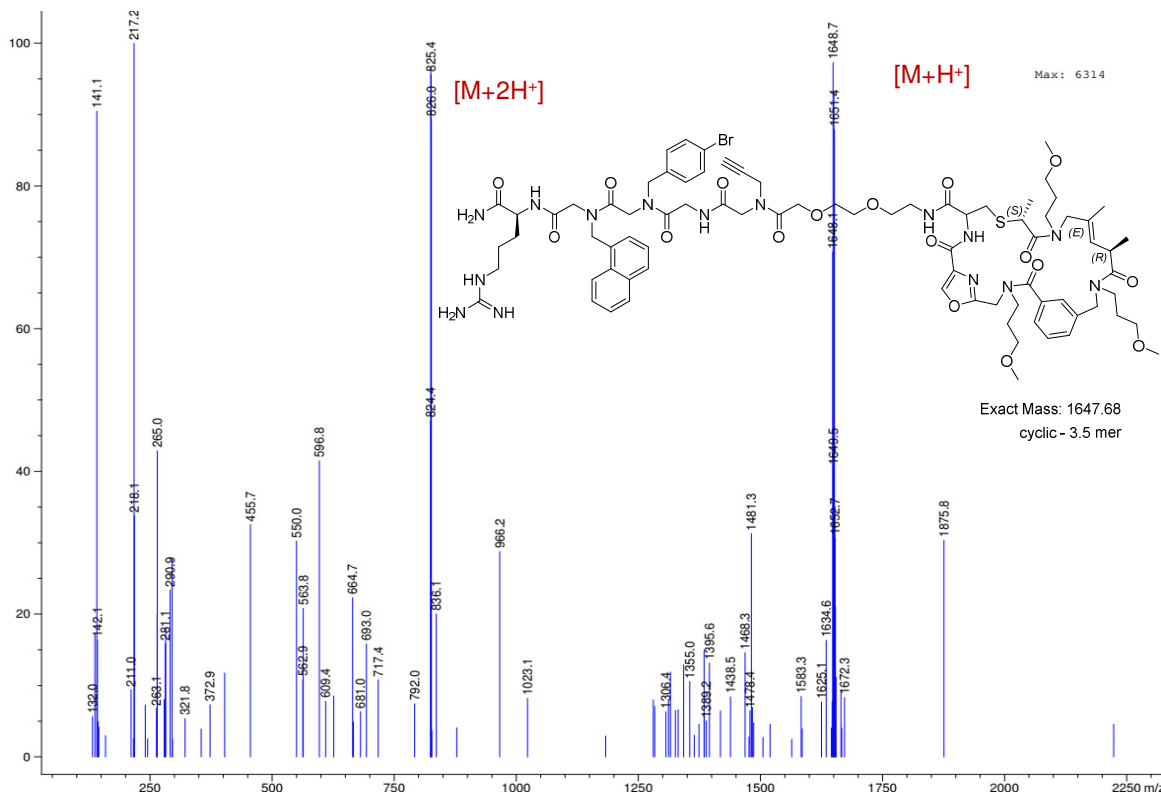



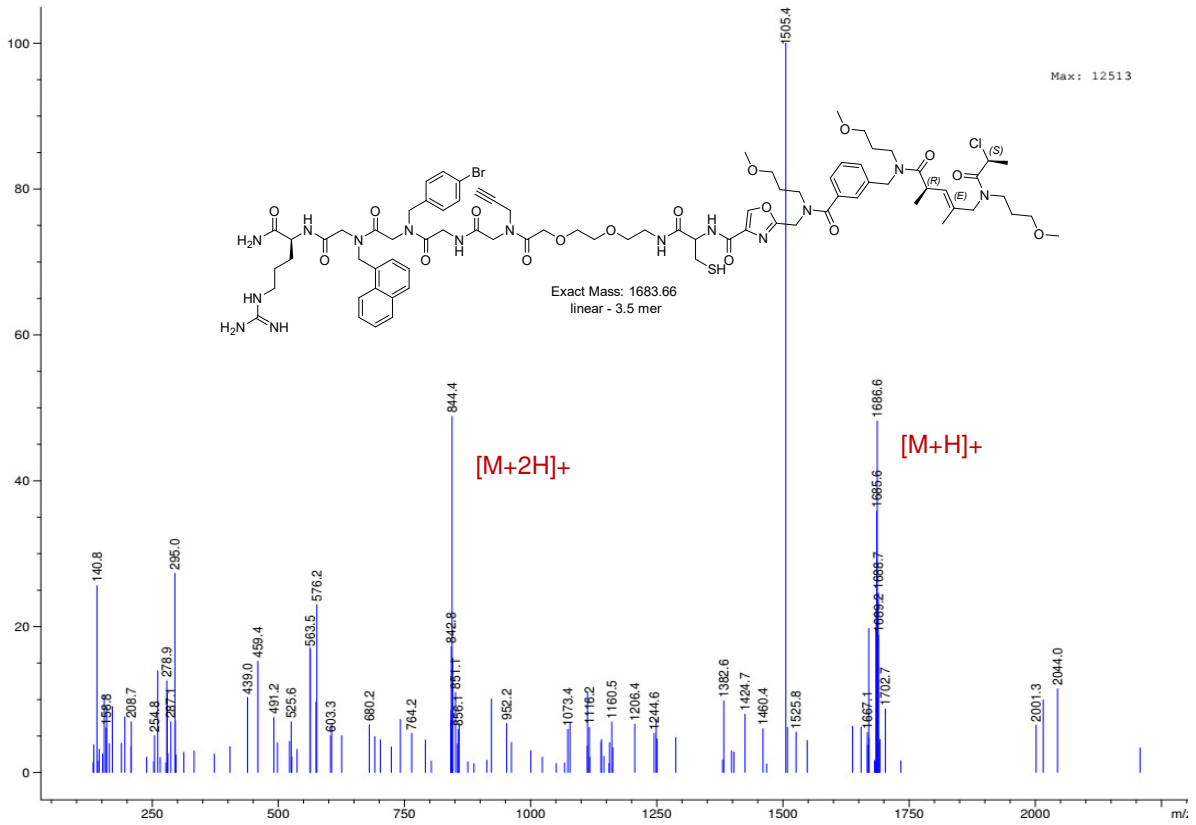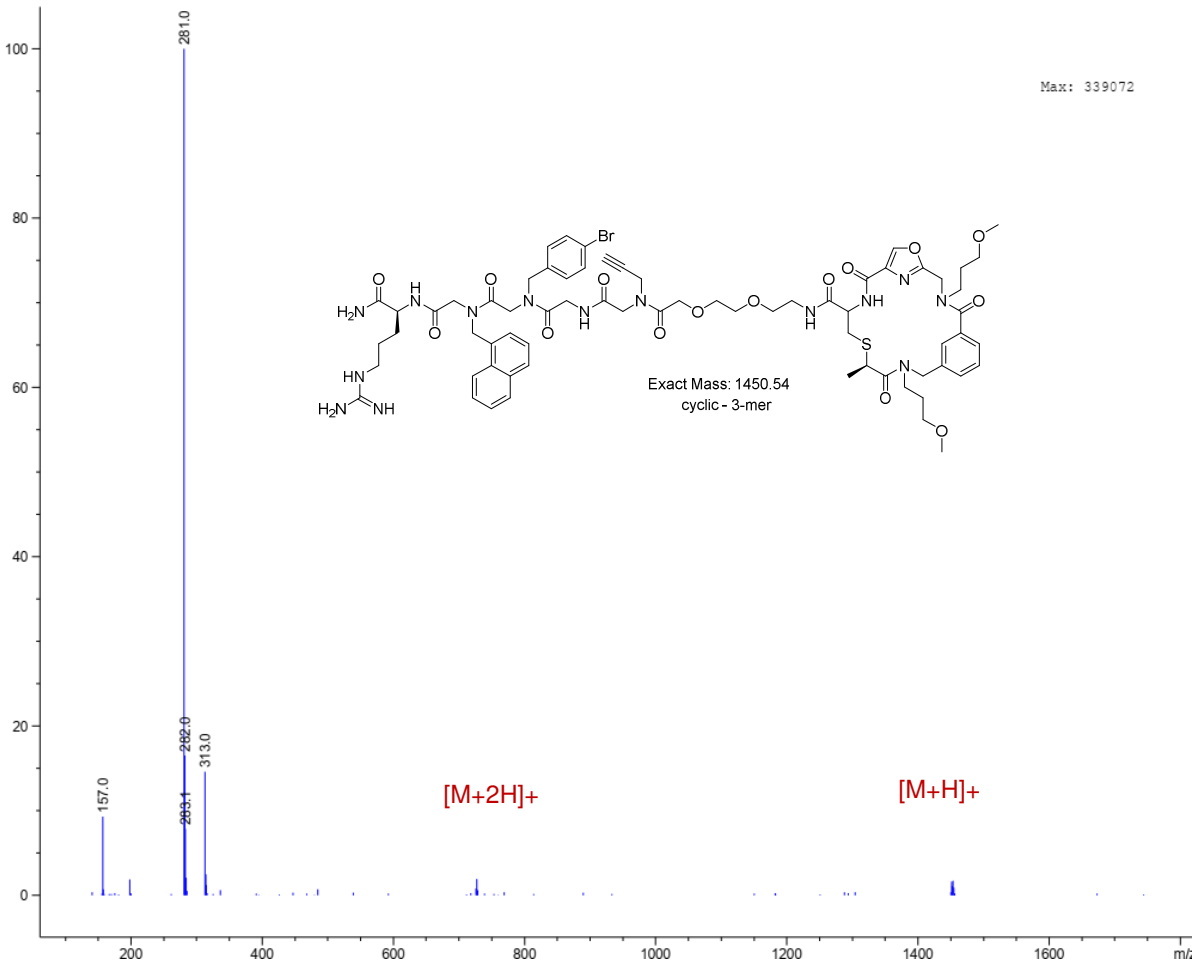

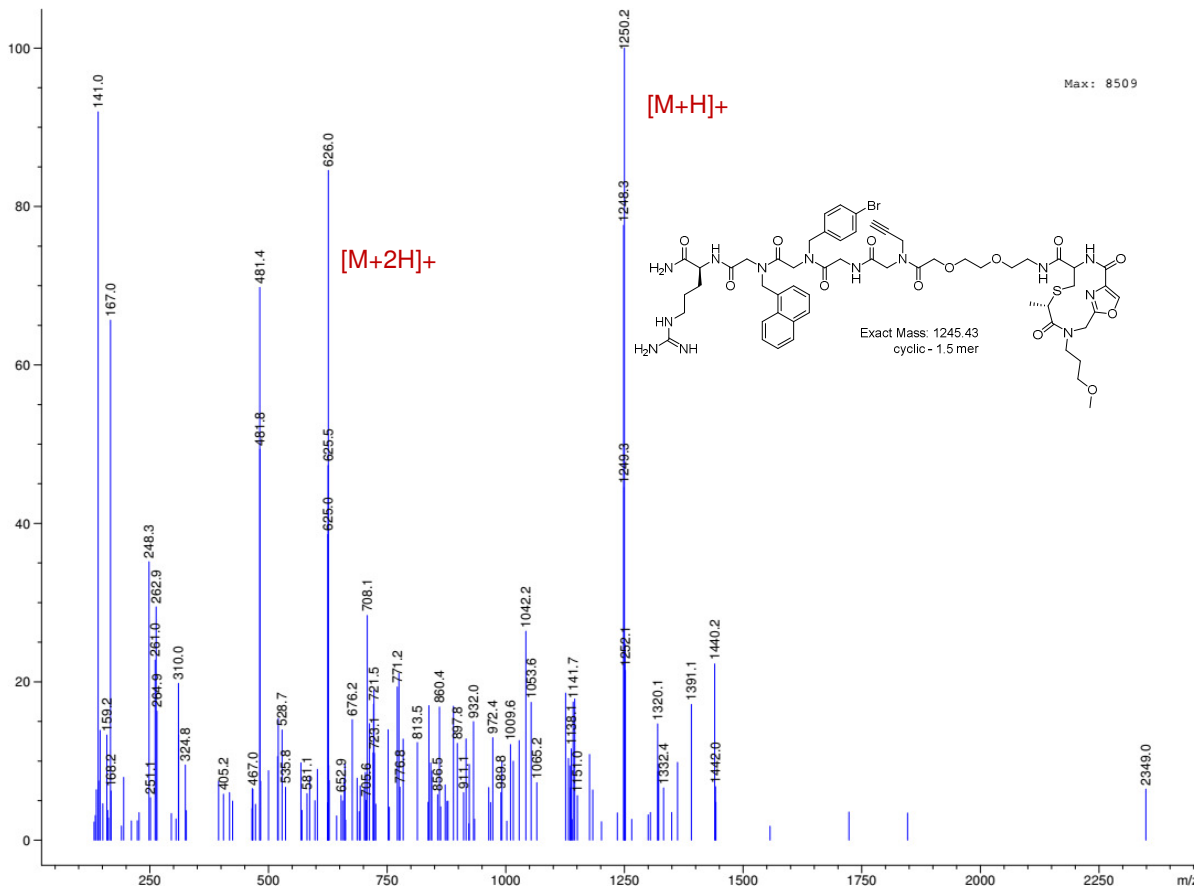

**K10-[ADB]:** Incomplete cyclization was observed on both 10  $\mu\text{m}$  & 160  $\mu\text{m}$  beads.

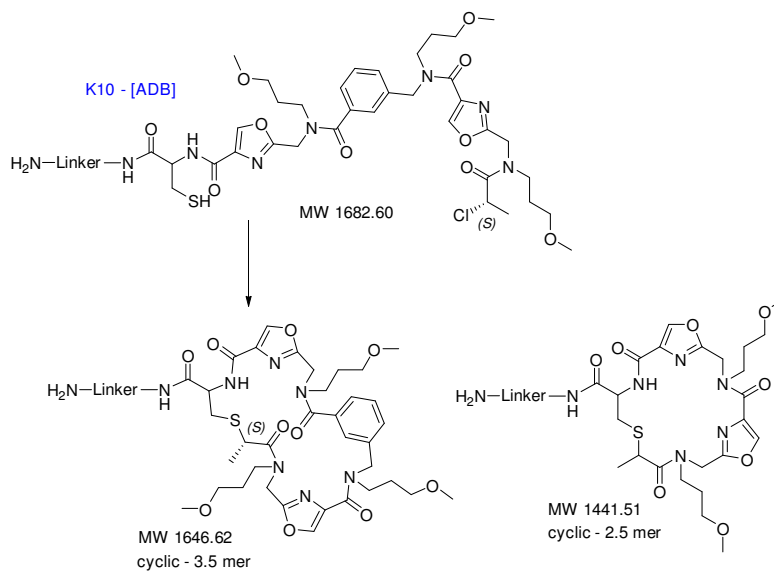

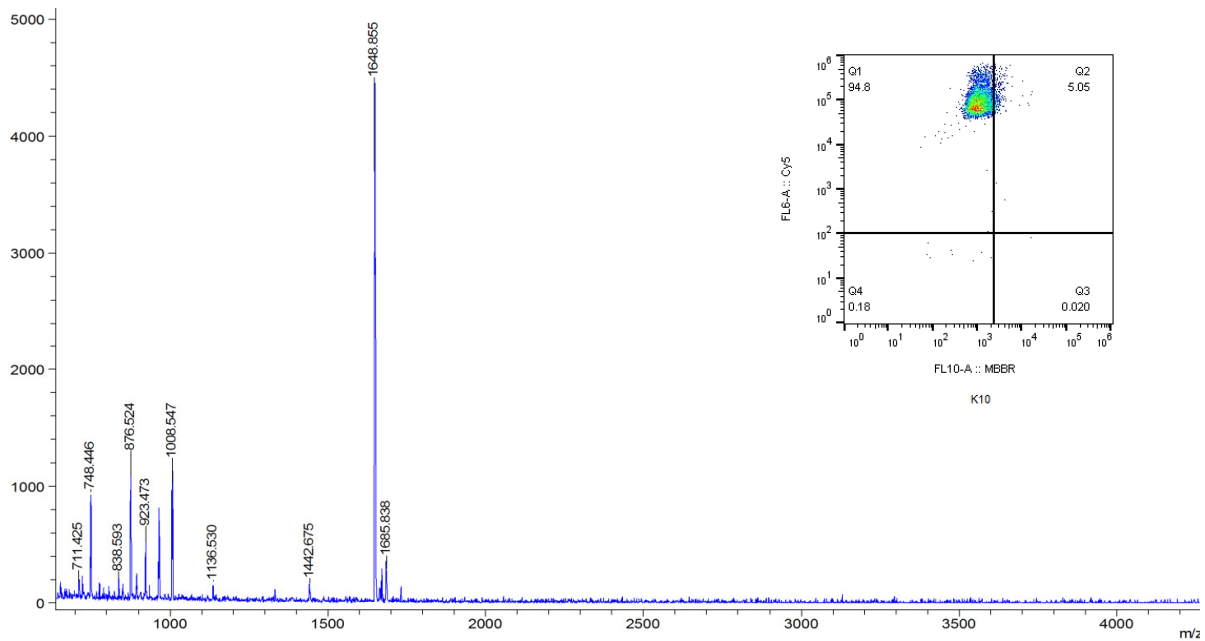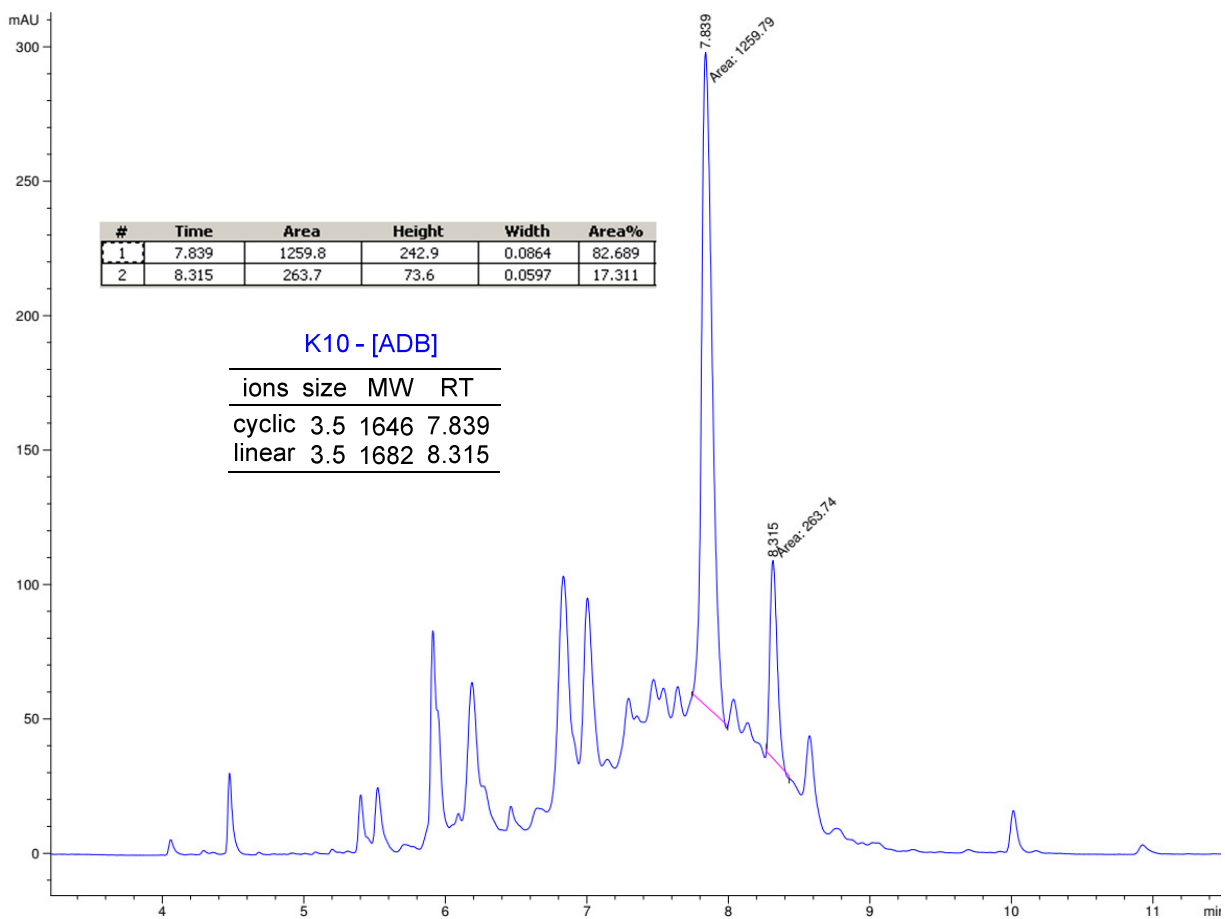

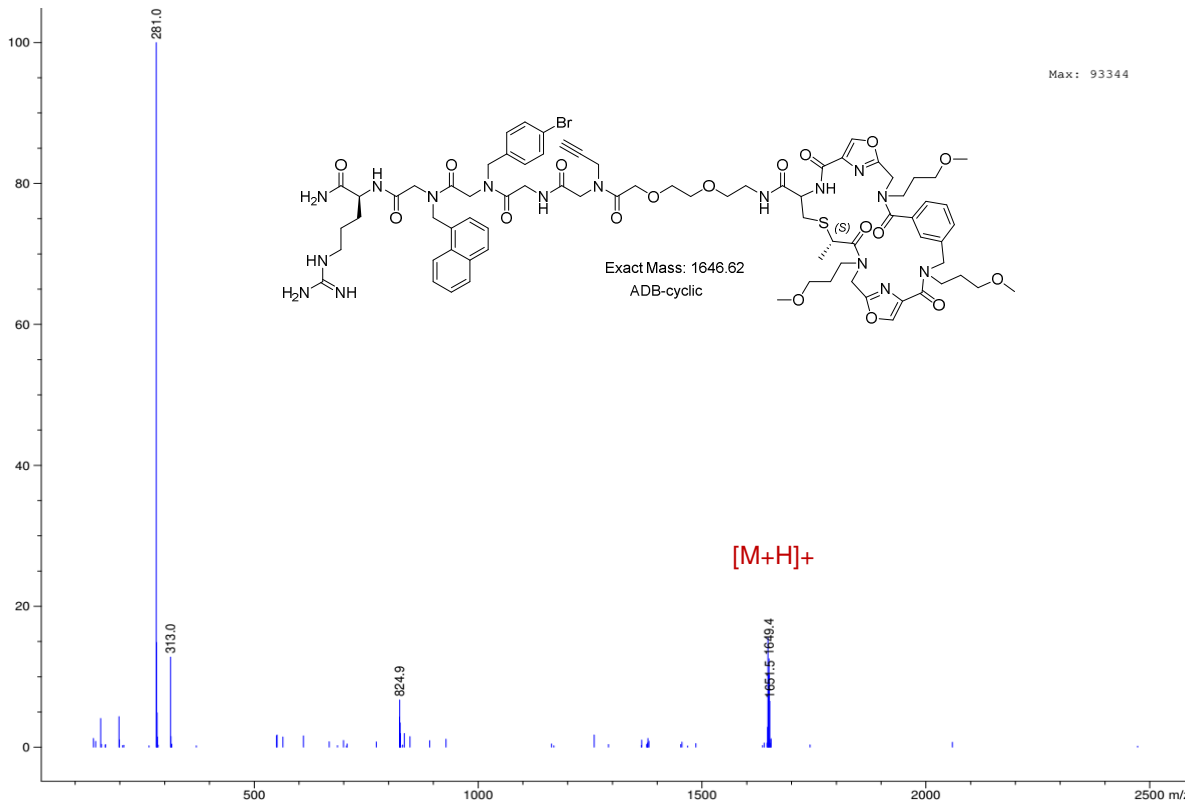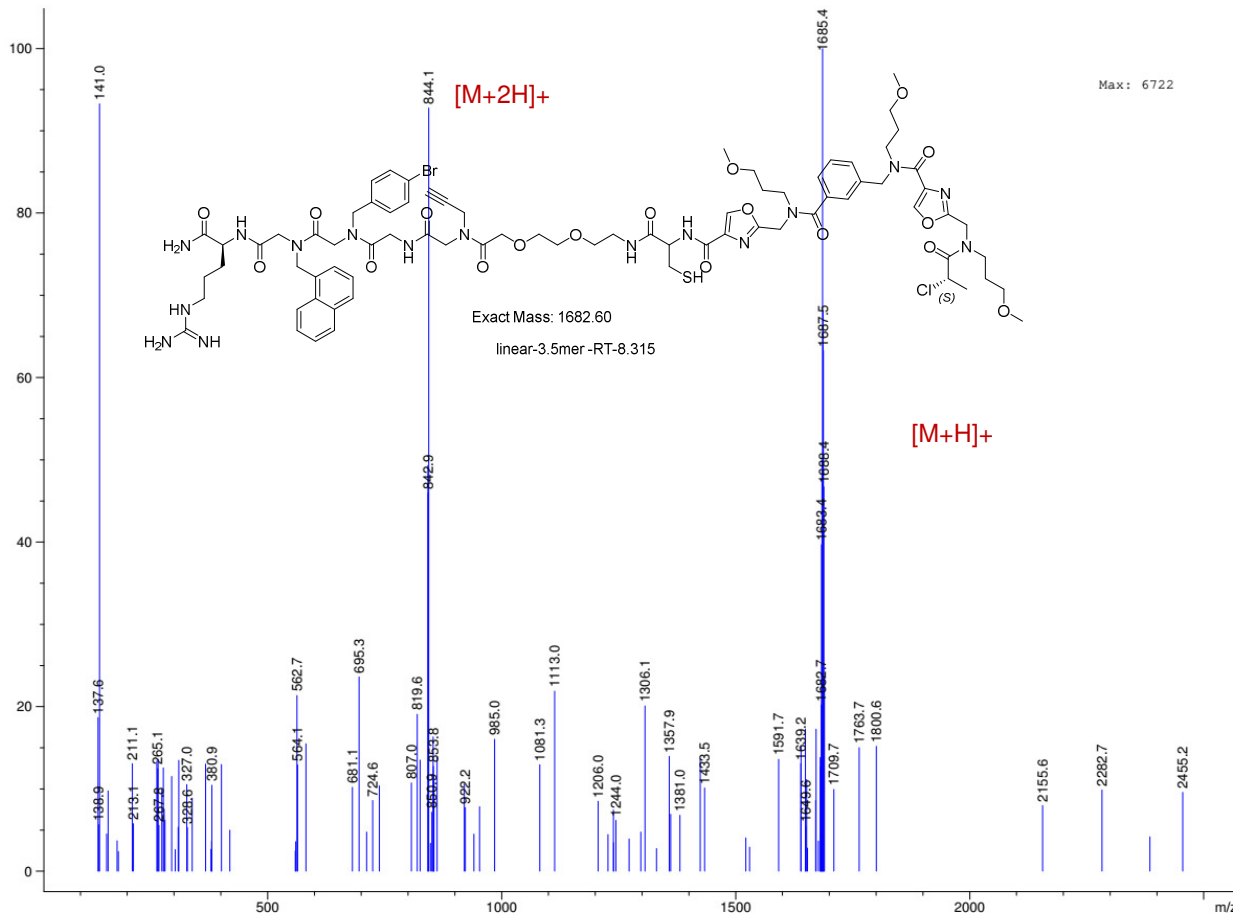

**L1-[BAA]:** Cyclization was incomplete on 10  $\mu$ m beads but was complete on 160  $\mu$ m beads.

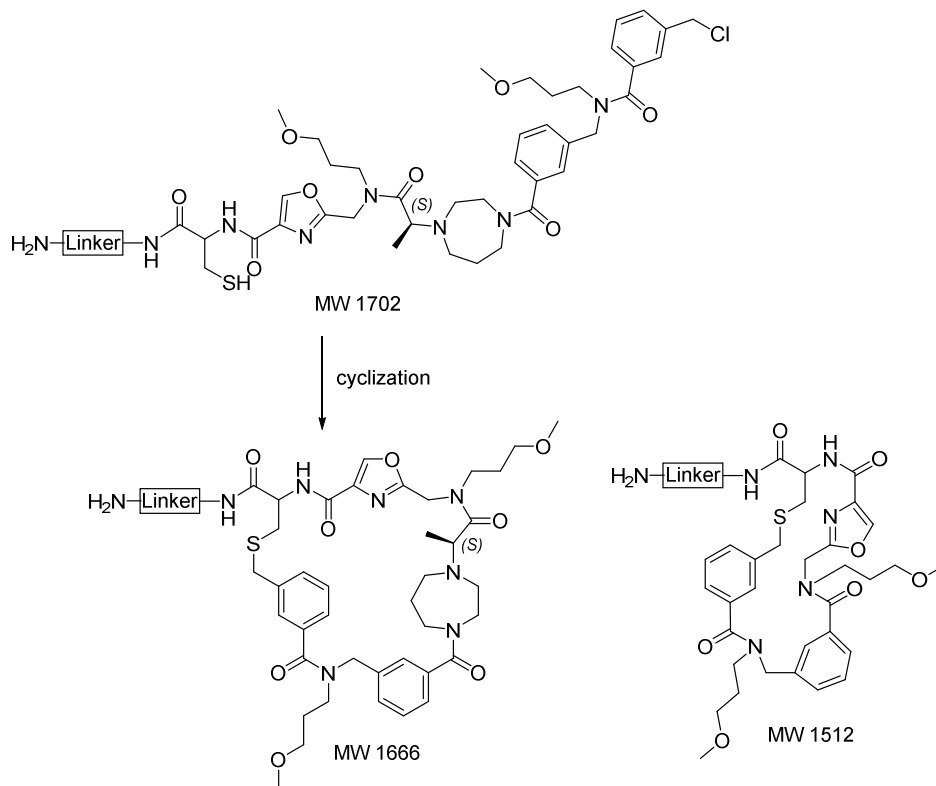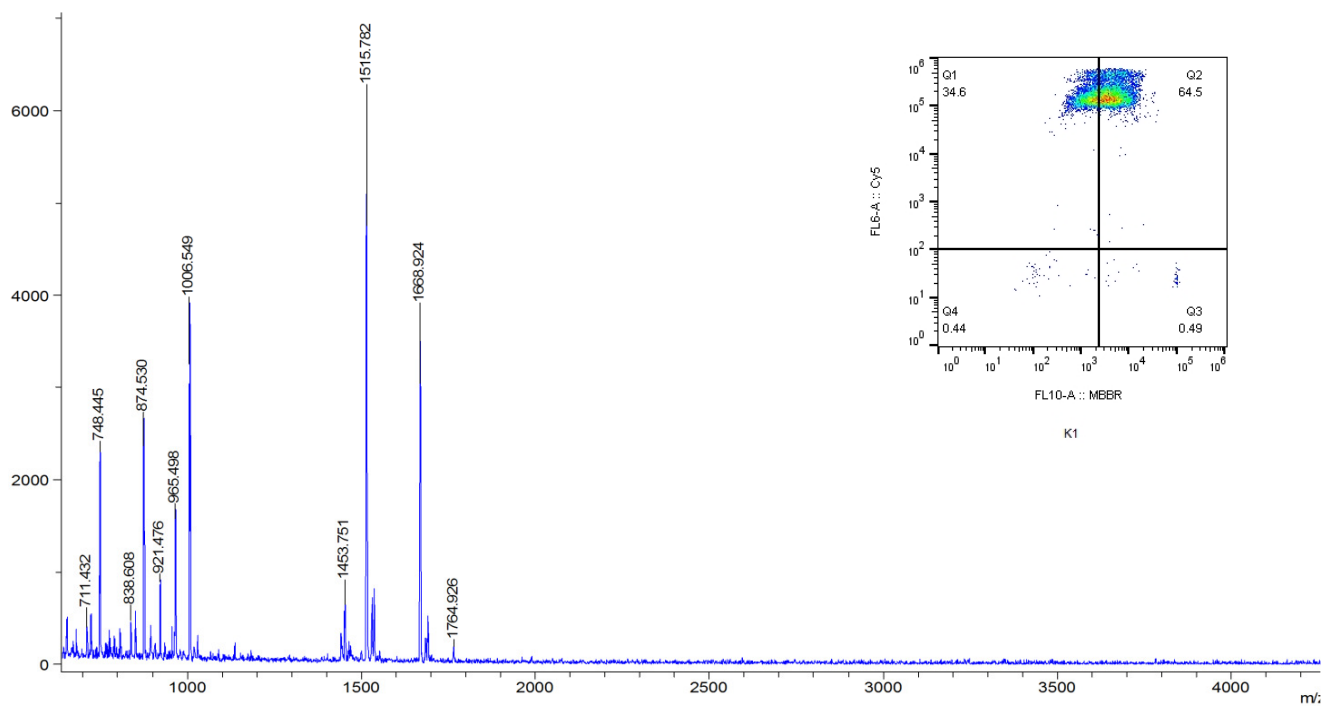

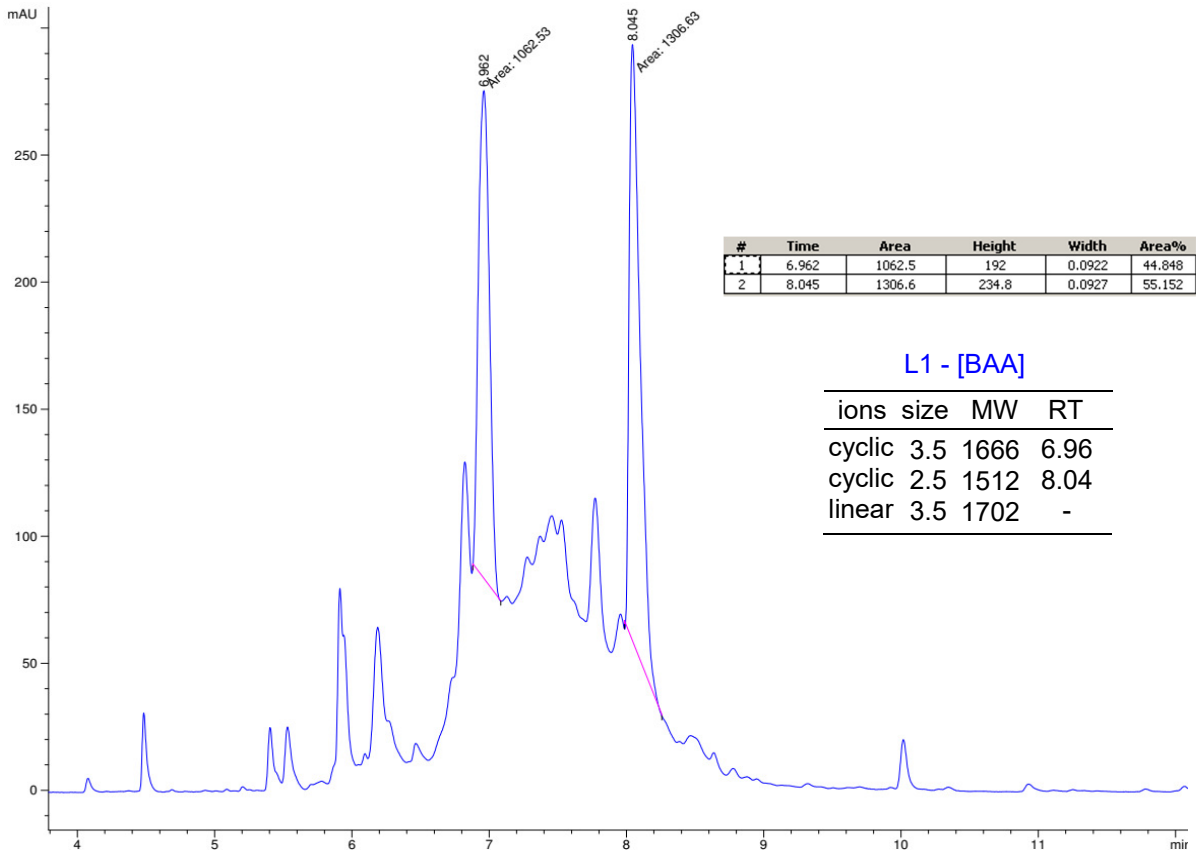

L1 - [BAA]

| ions size  | MW   | RT   |
|------------|------|------|
| cyclic 3.5 | 1666 | 6.96 |
| cyclic 2.5 | 1512 | 8.04 |
| linear 3.5 | 1702 | -    |

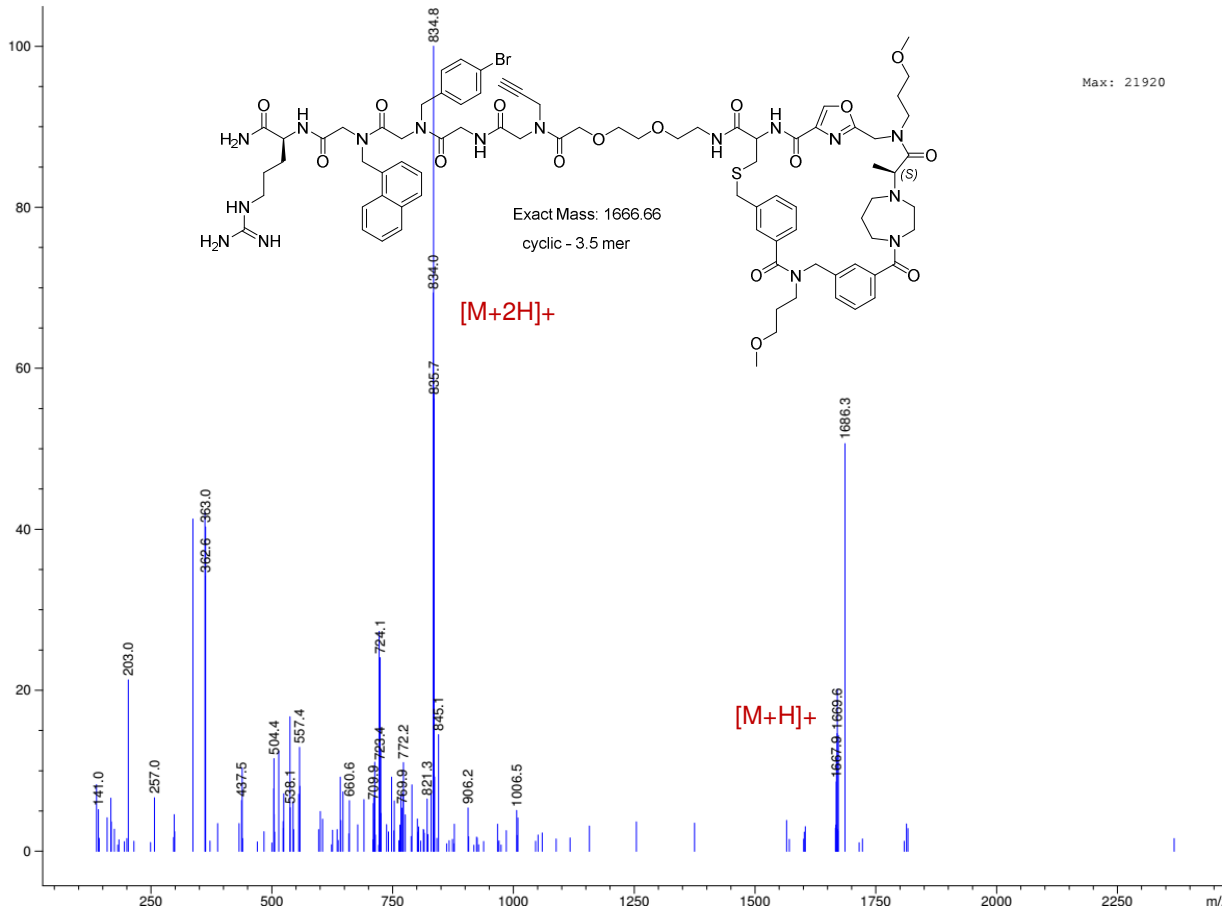



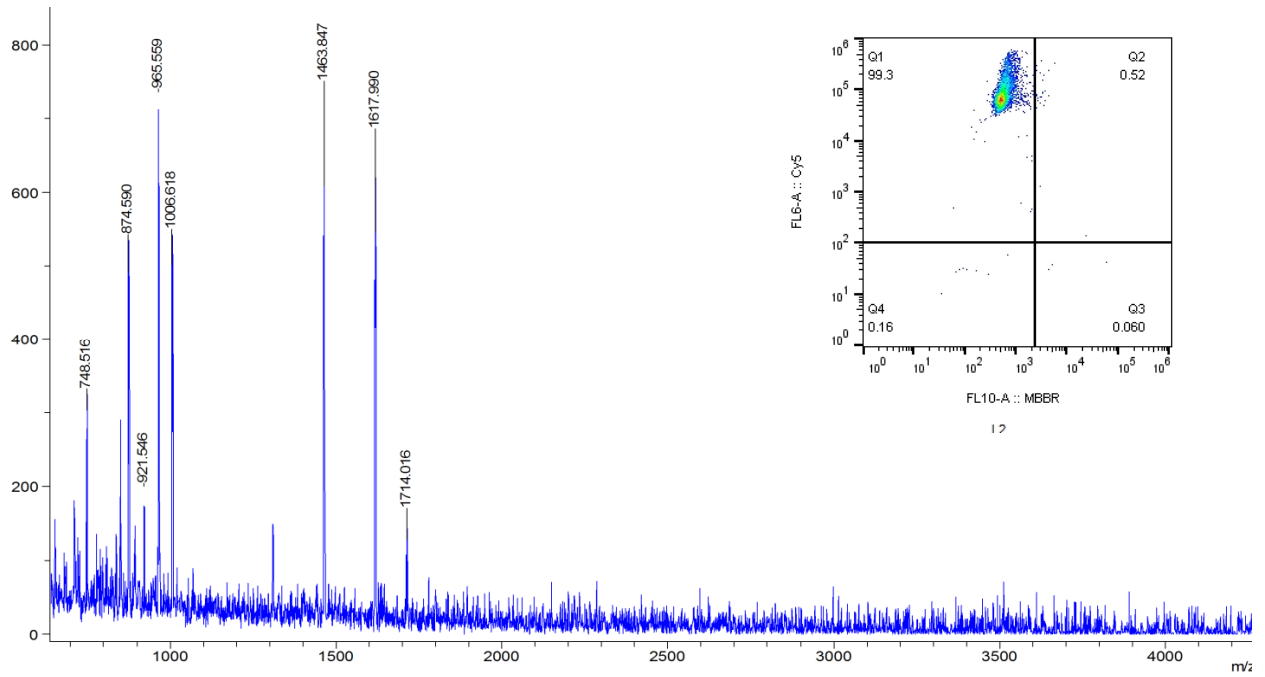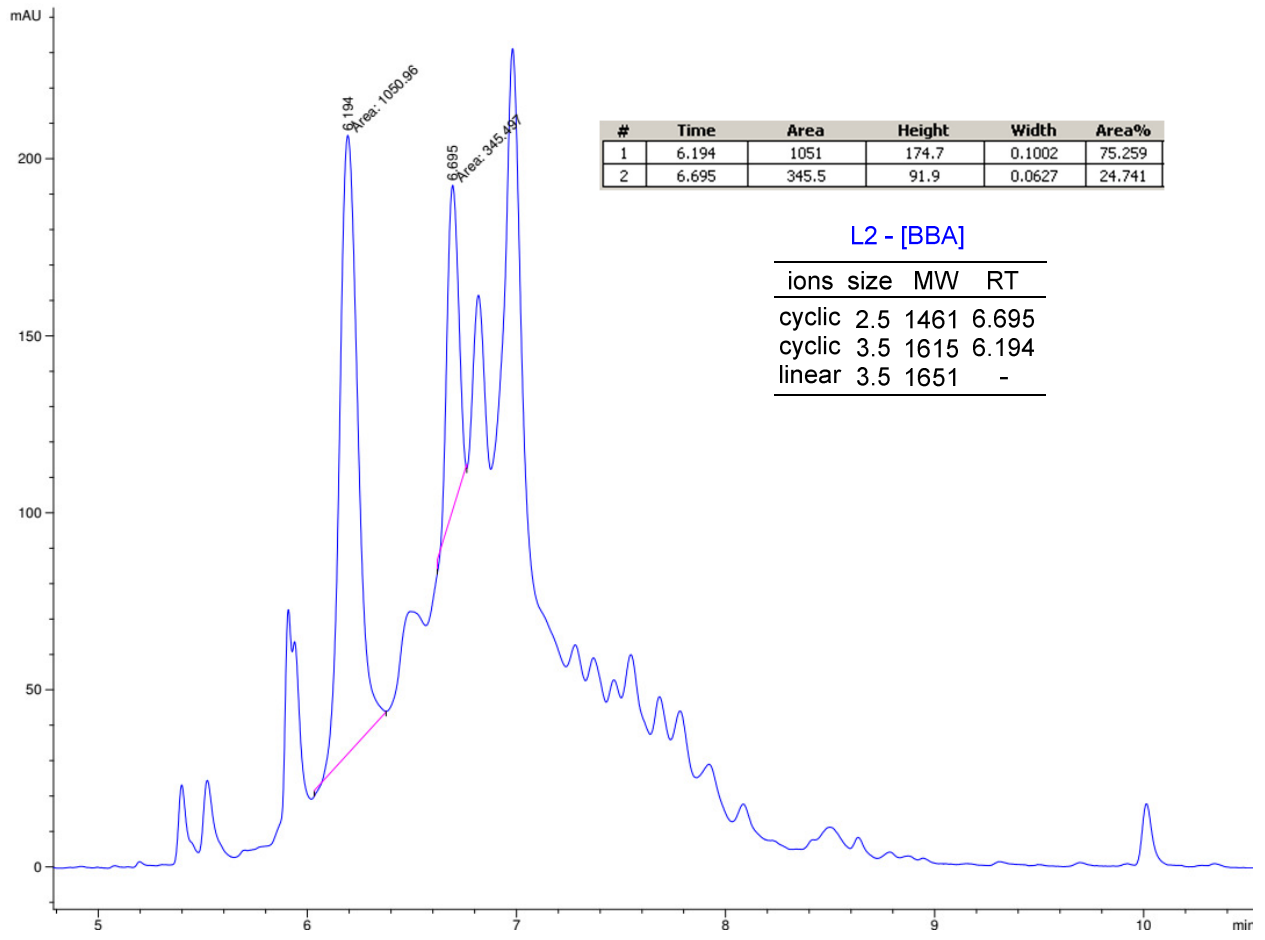



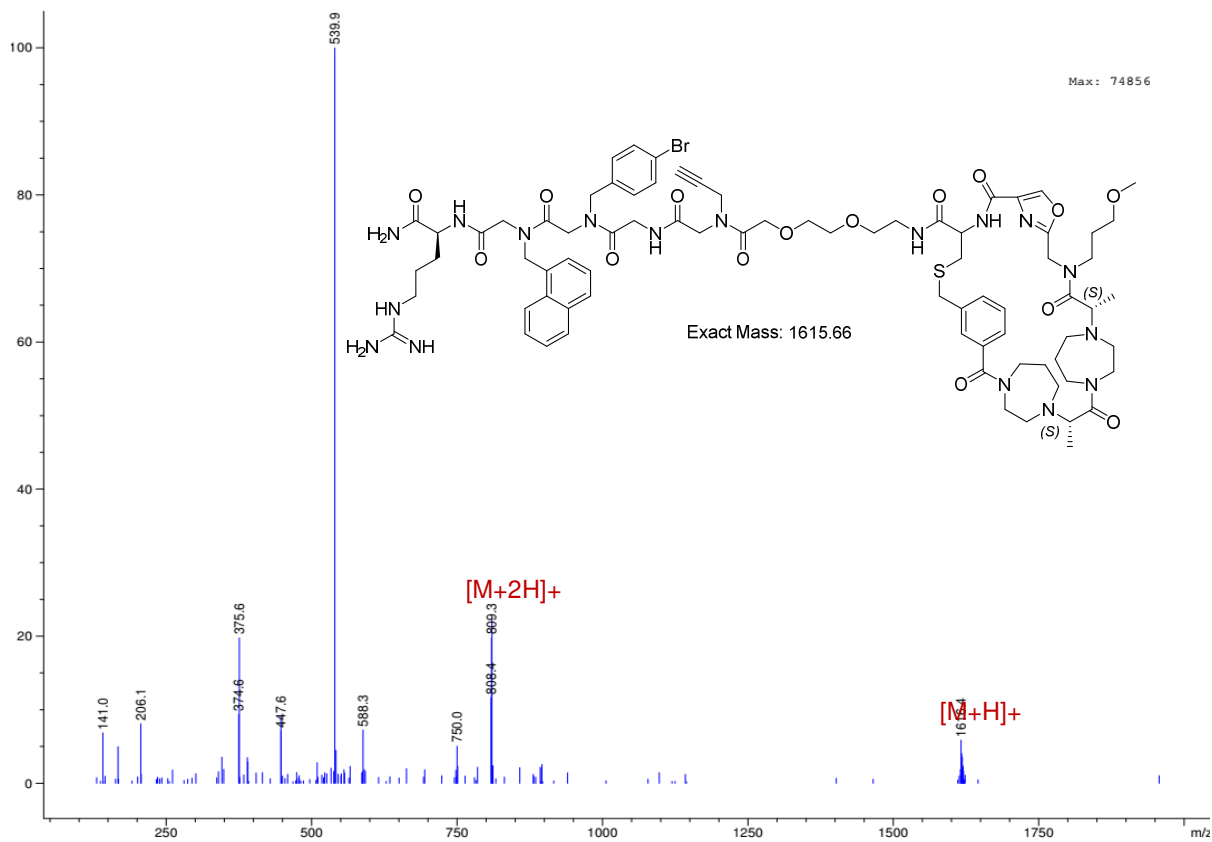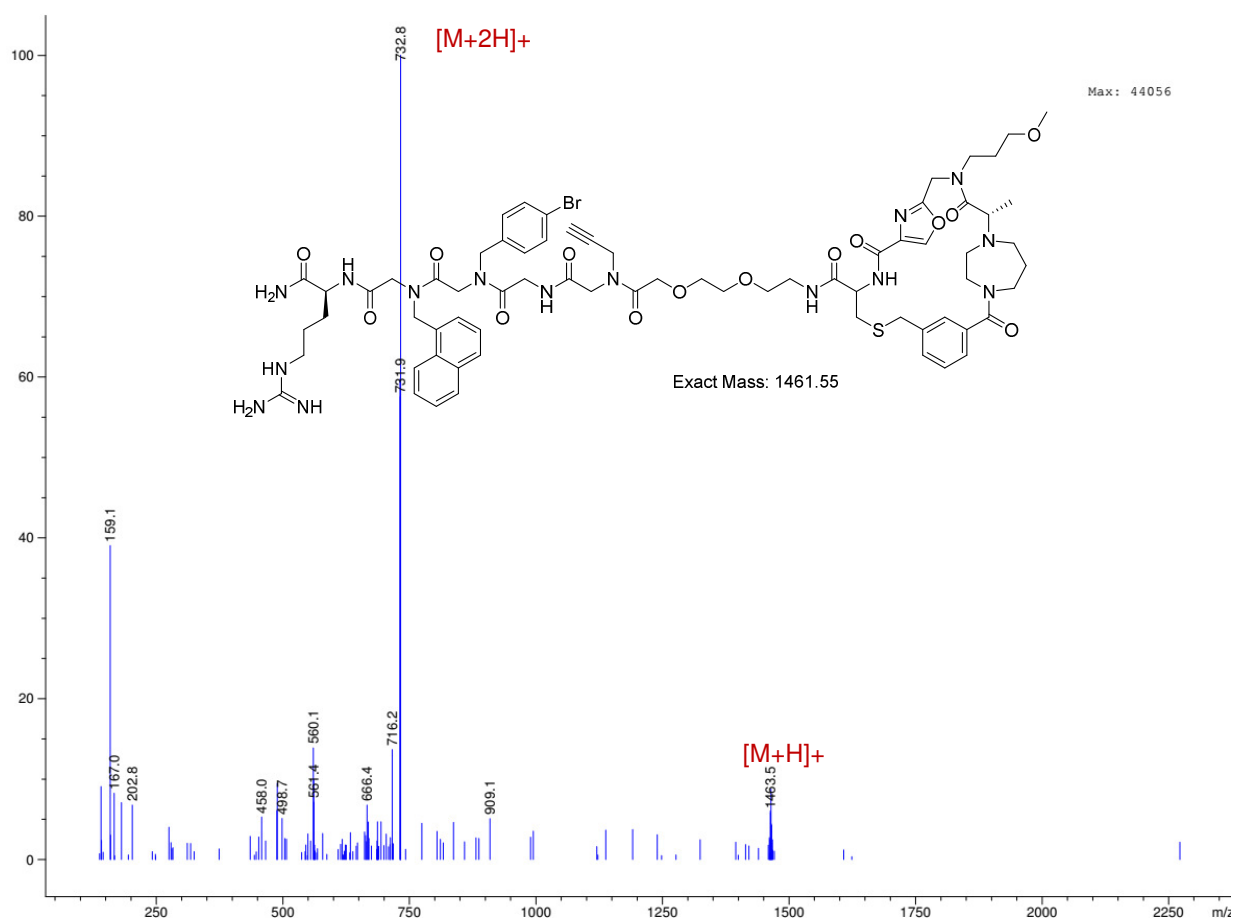

**L3-[BCA]:** Cyclization was complete on both 10  $\mu\text{m}$  & 160  $\mu\text{m}$  beads.

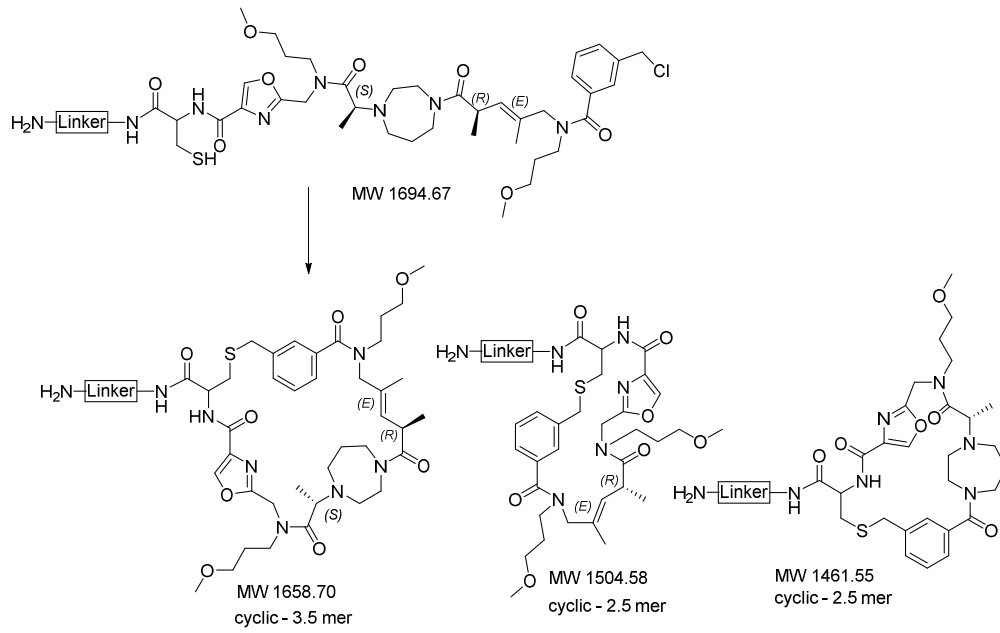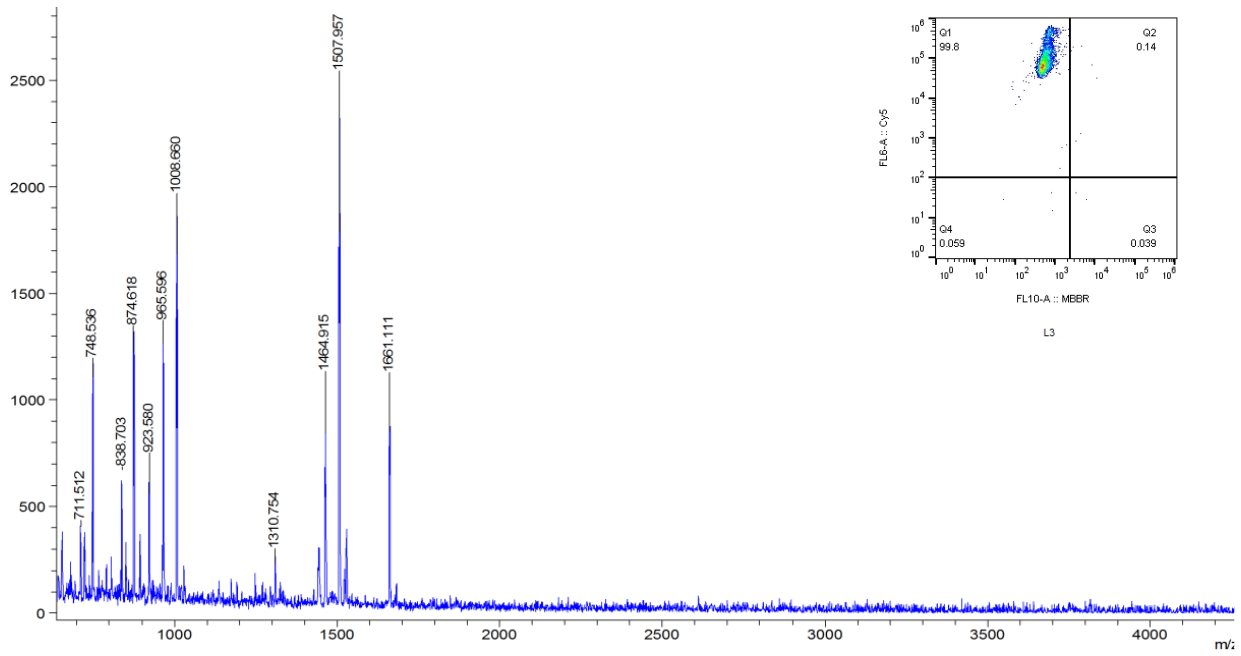

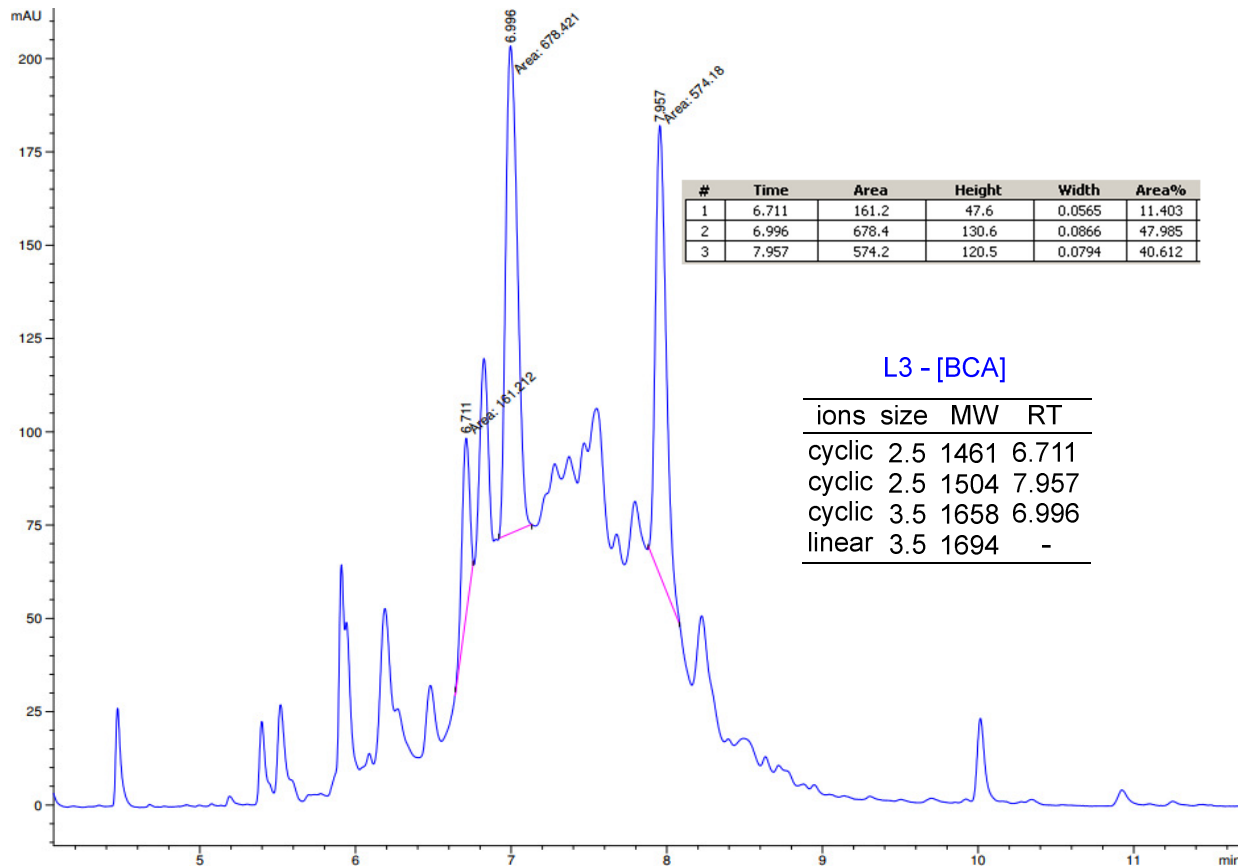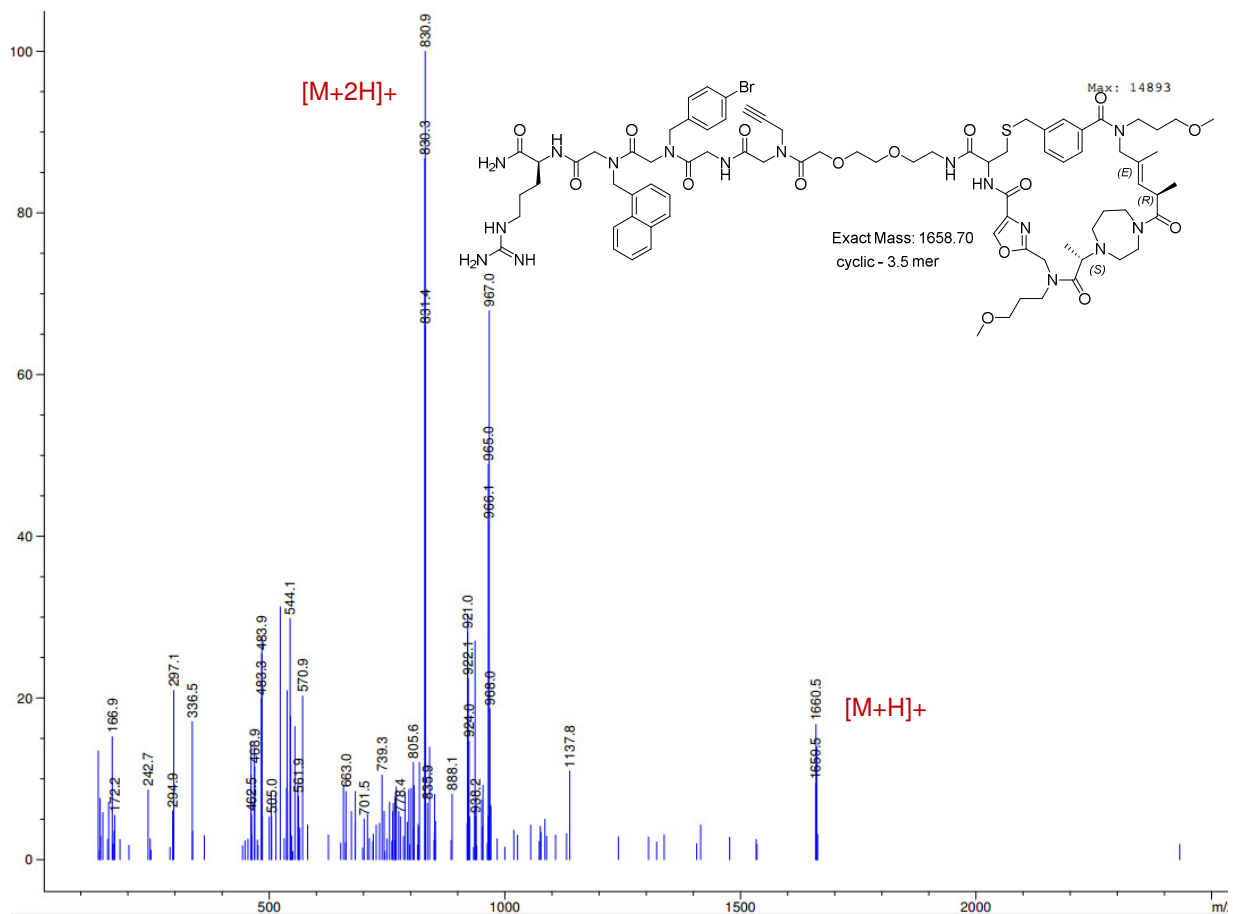

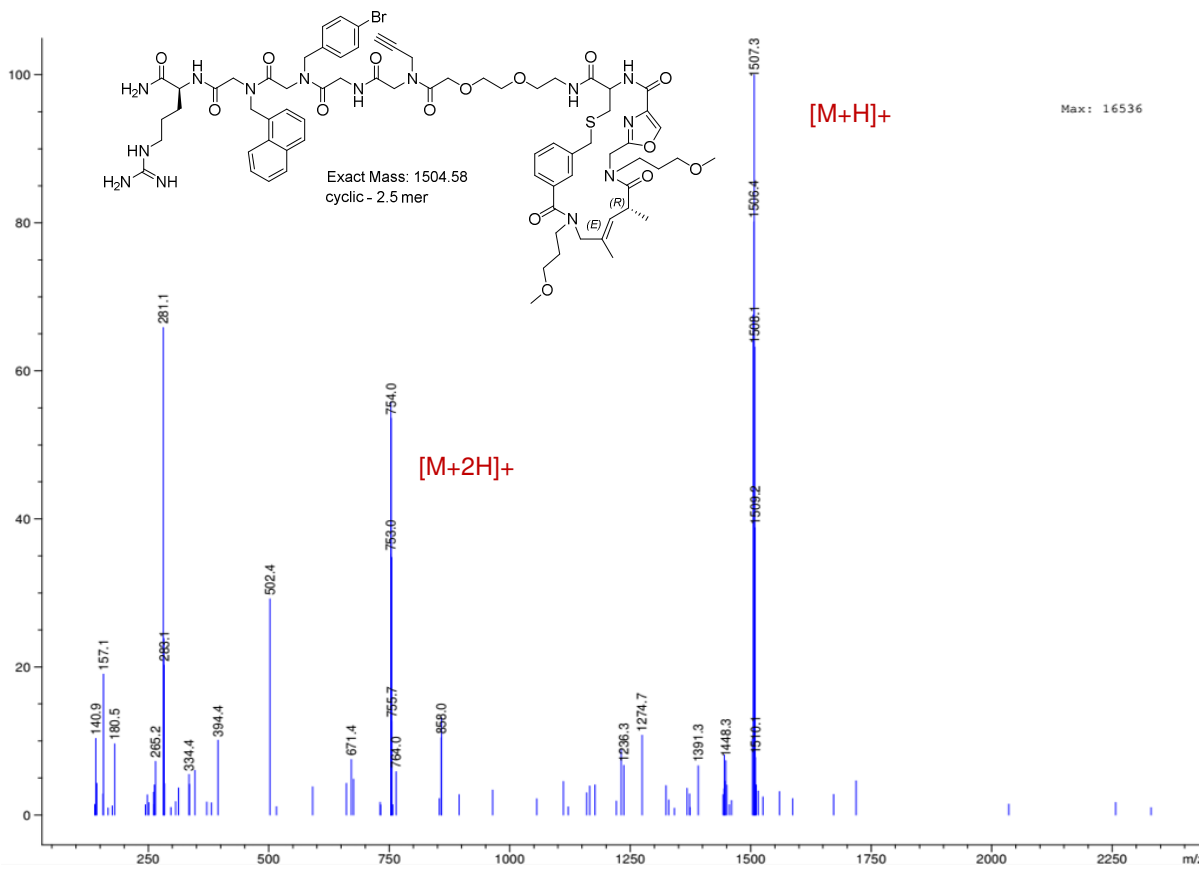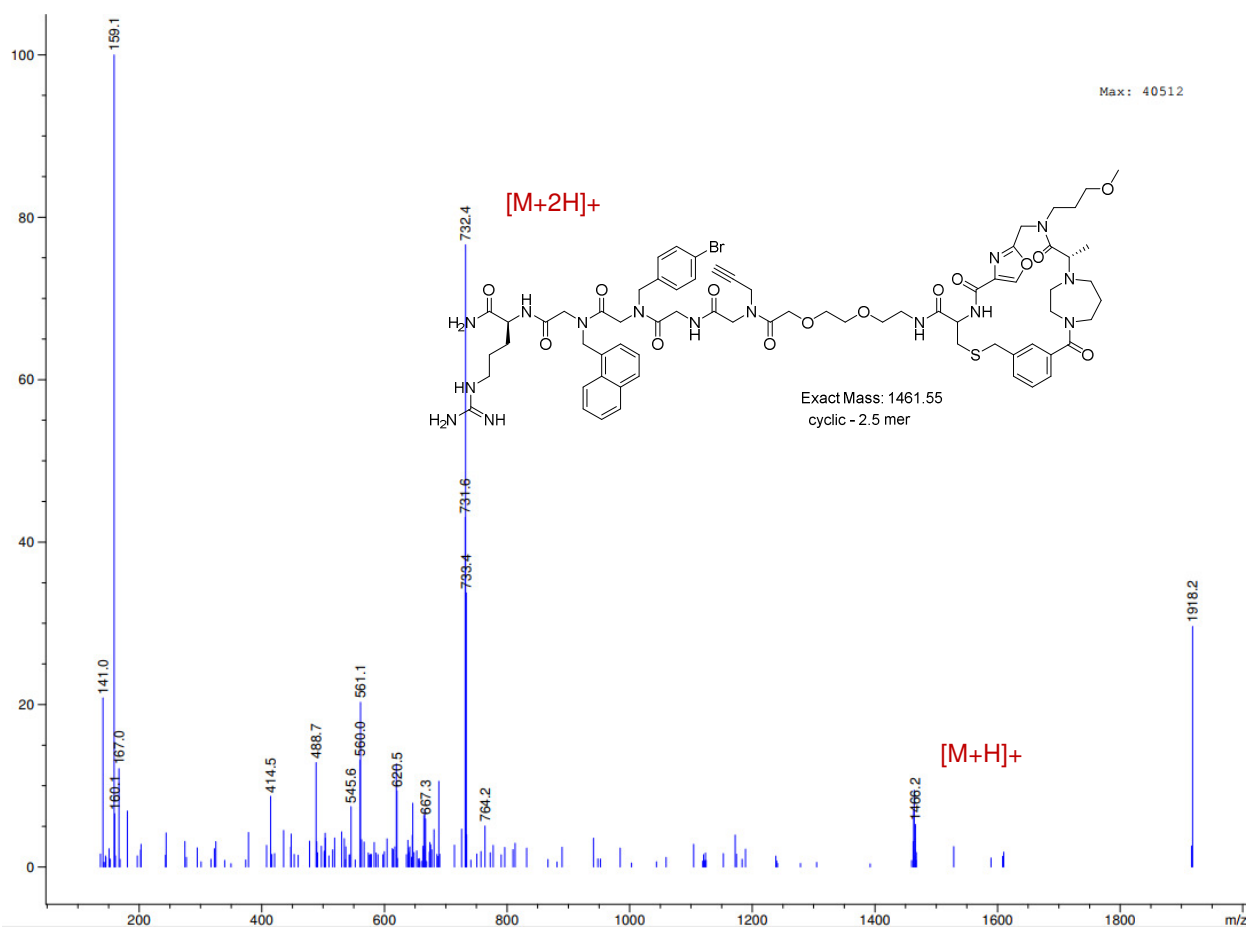

**L4-[BDA]:** Complete cyclization was observed on 10  $\mu\text{m}$  & 160  $\mu\text{m}$  beads.

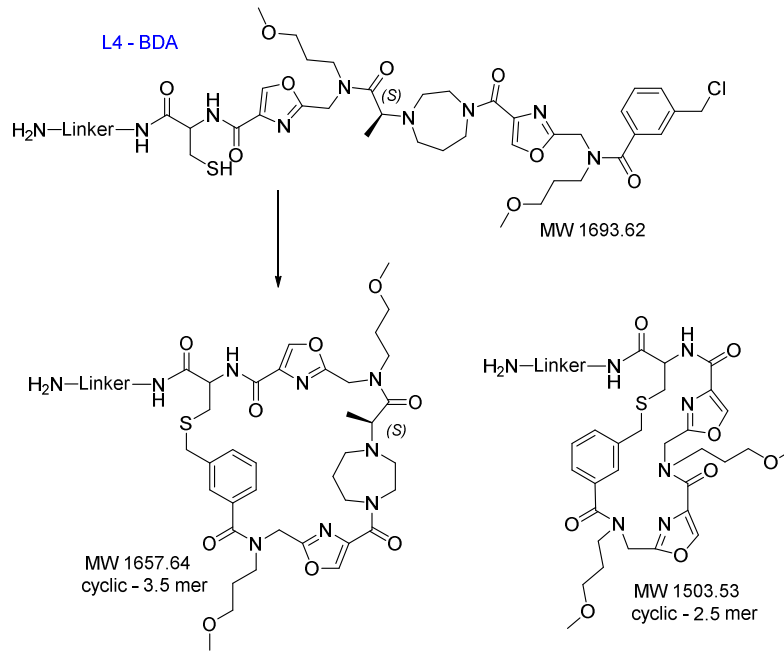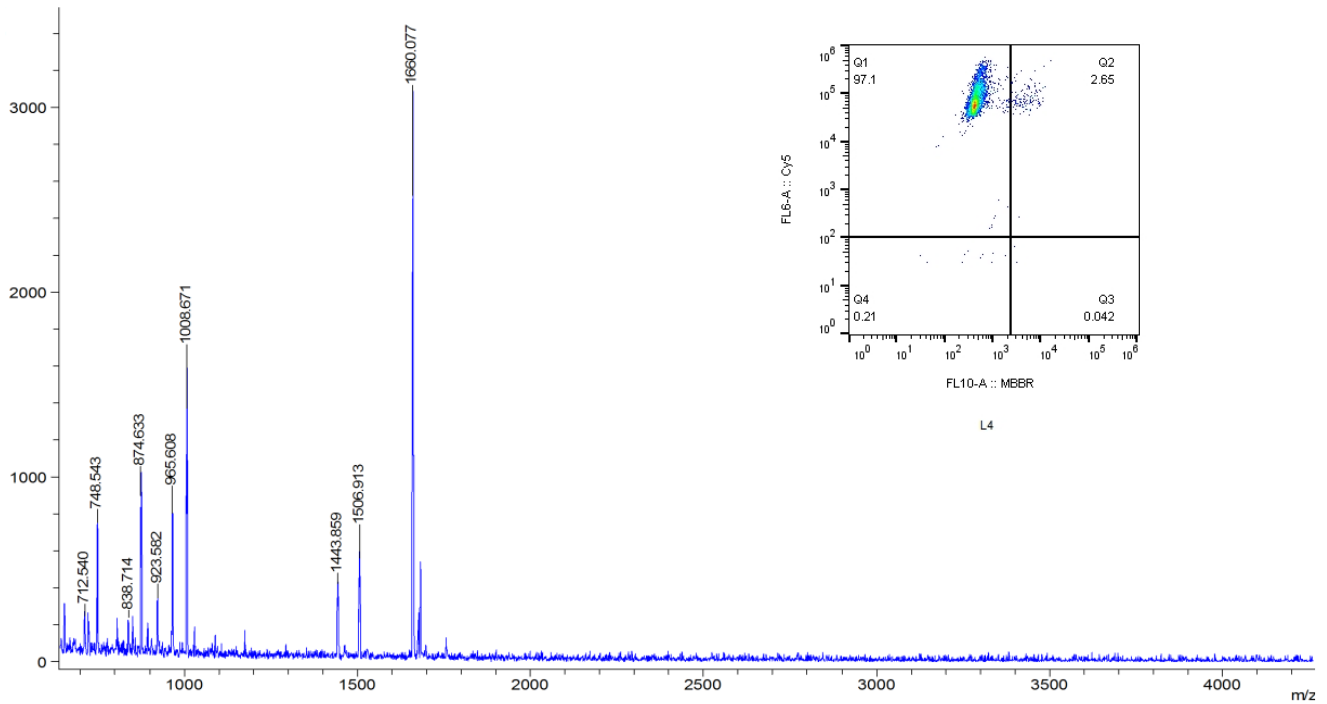

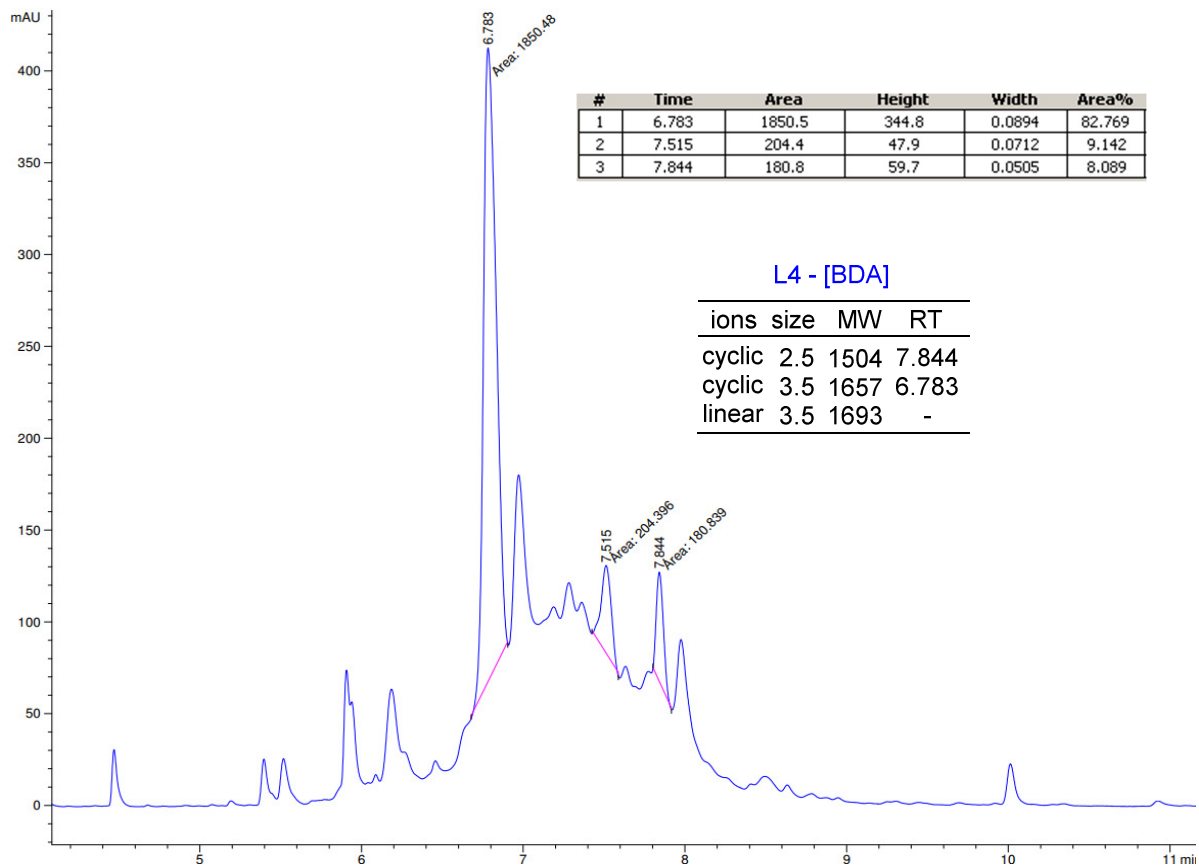

L4 - [BDA]

|        | ions size | MW   | RT    |
|--------|-----------|------|-------|
| cyclic | 2.5       | 1504 | 7.844 |
| cyclic | 3.5       | 1657 | 6.783 |
| linear | 3.5       | 1693 | -     |

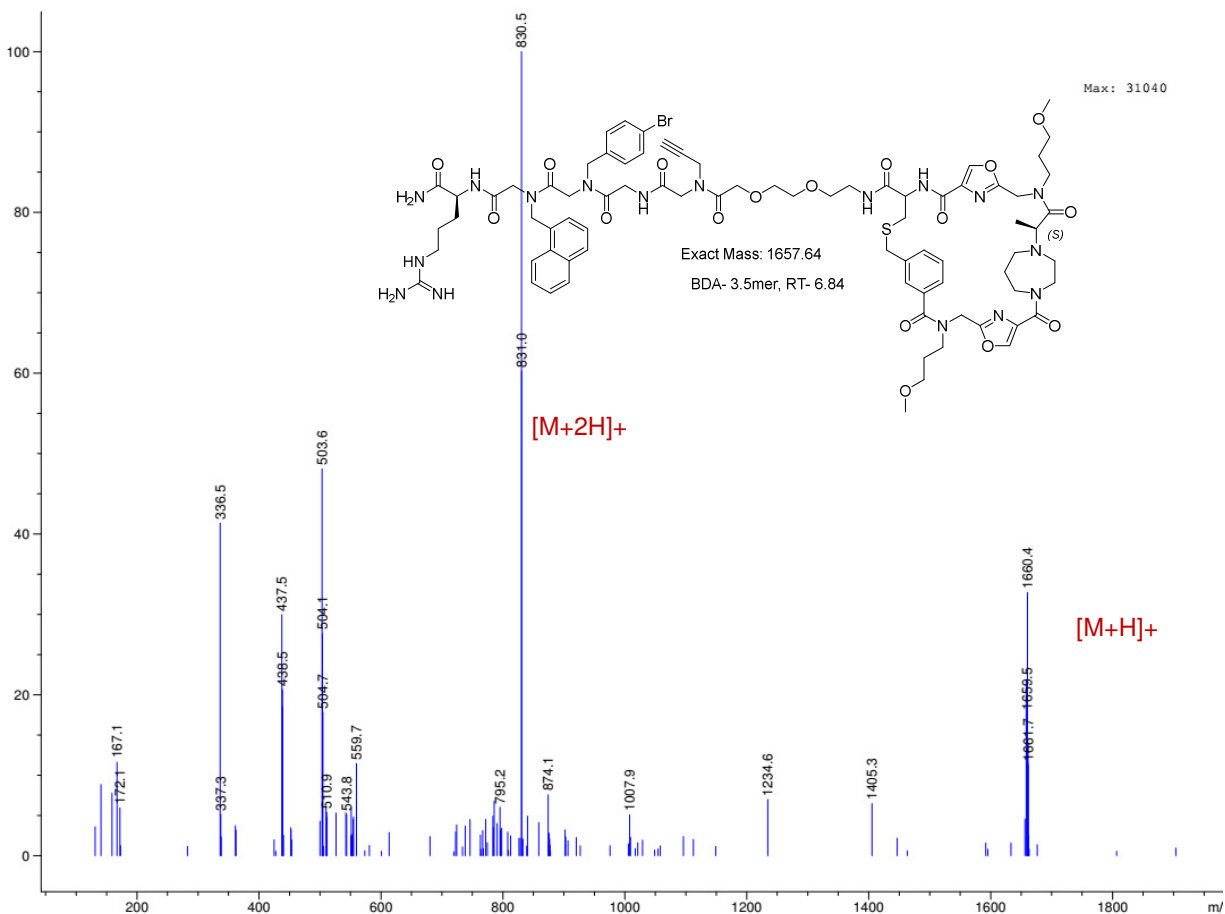

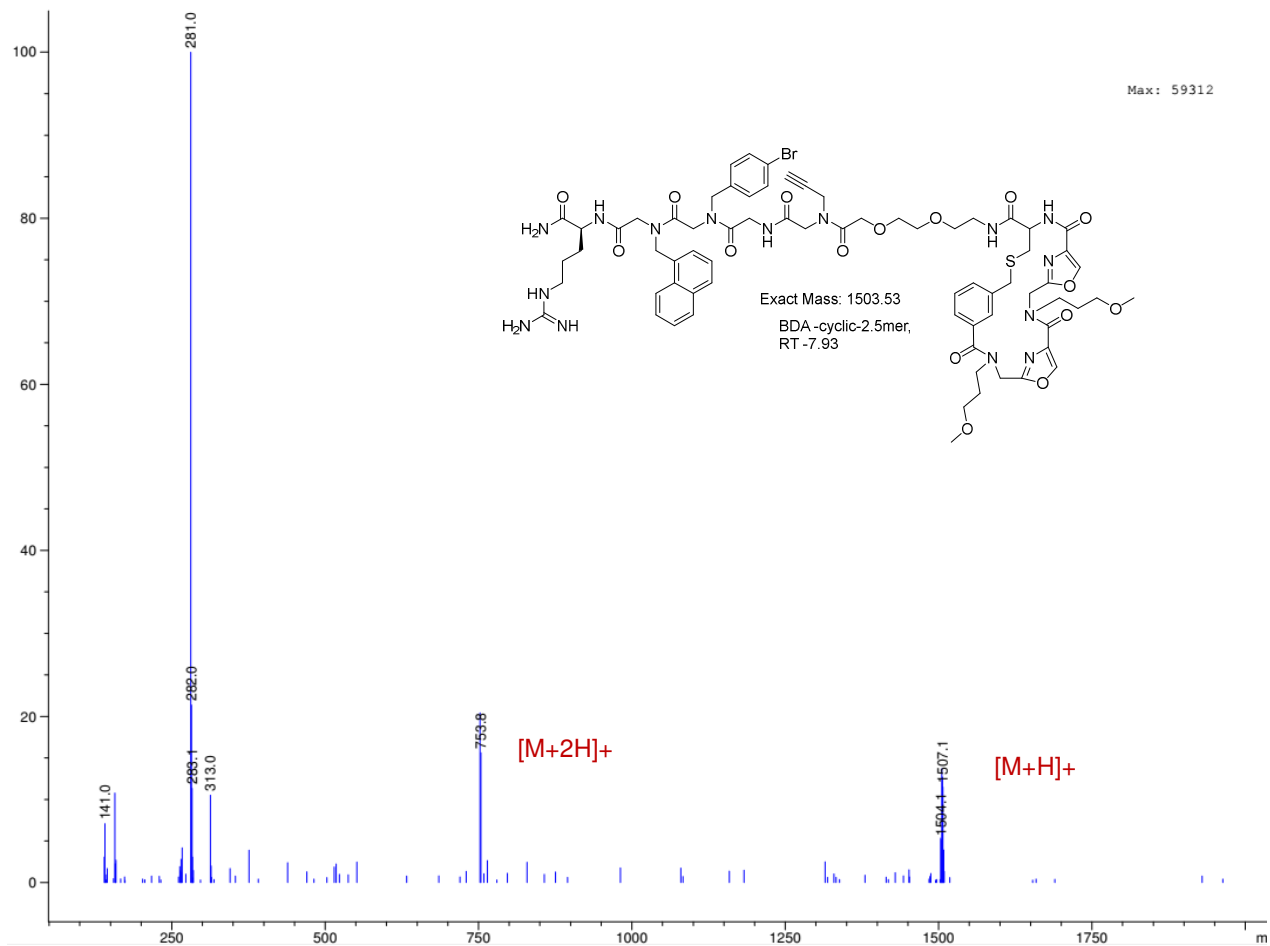

**L7-[BAB]:** Complete cyclization was observed on 10  $\mu\text{m}$  & 160  $\mu\text{m}$  beads have >90% cyclization complete.

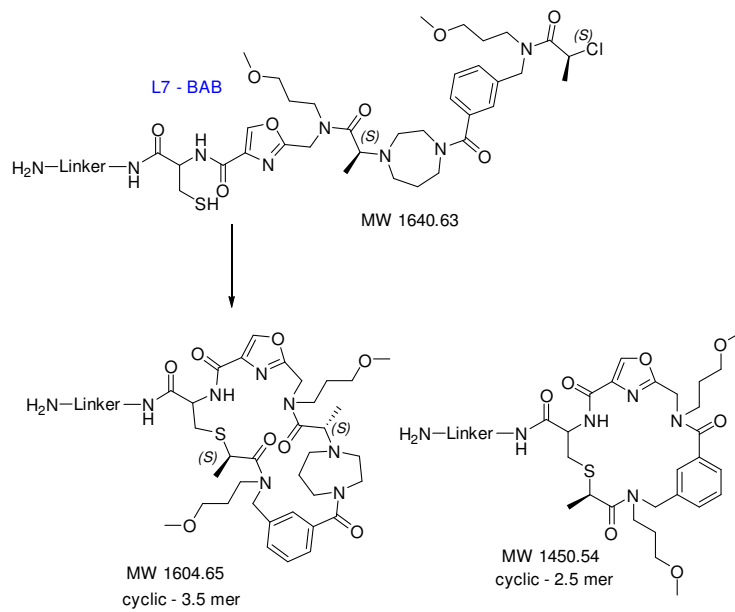

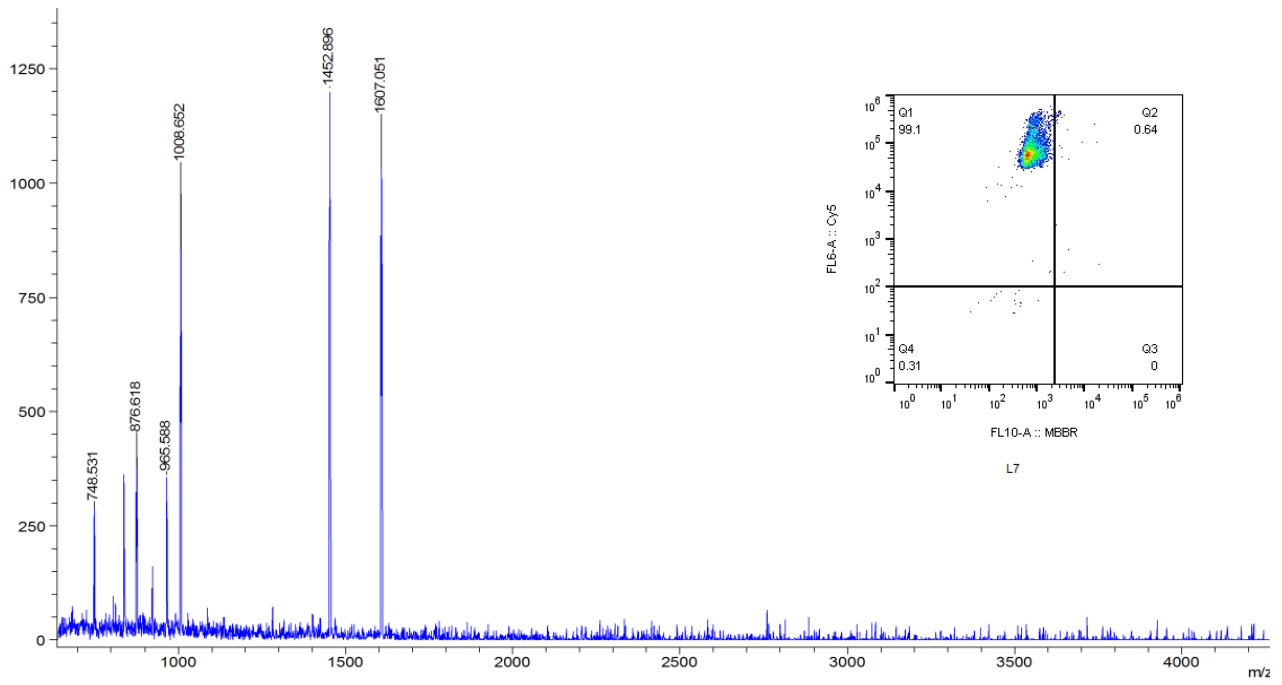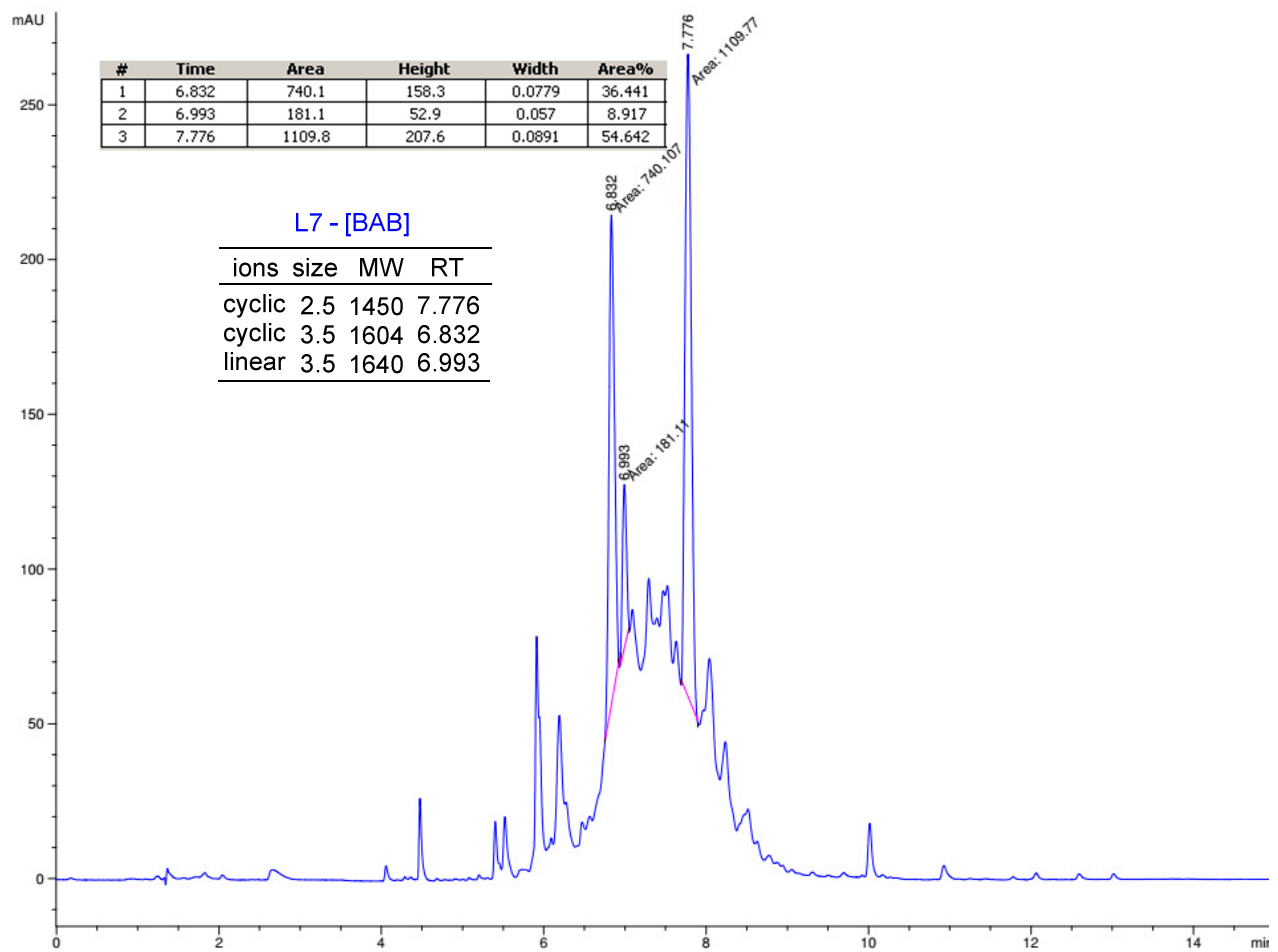



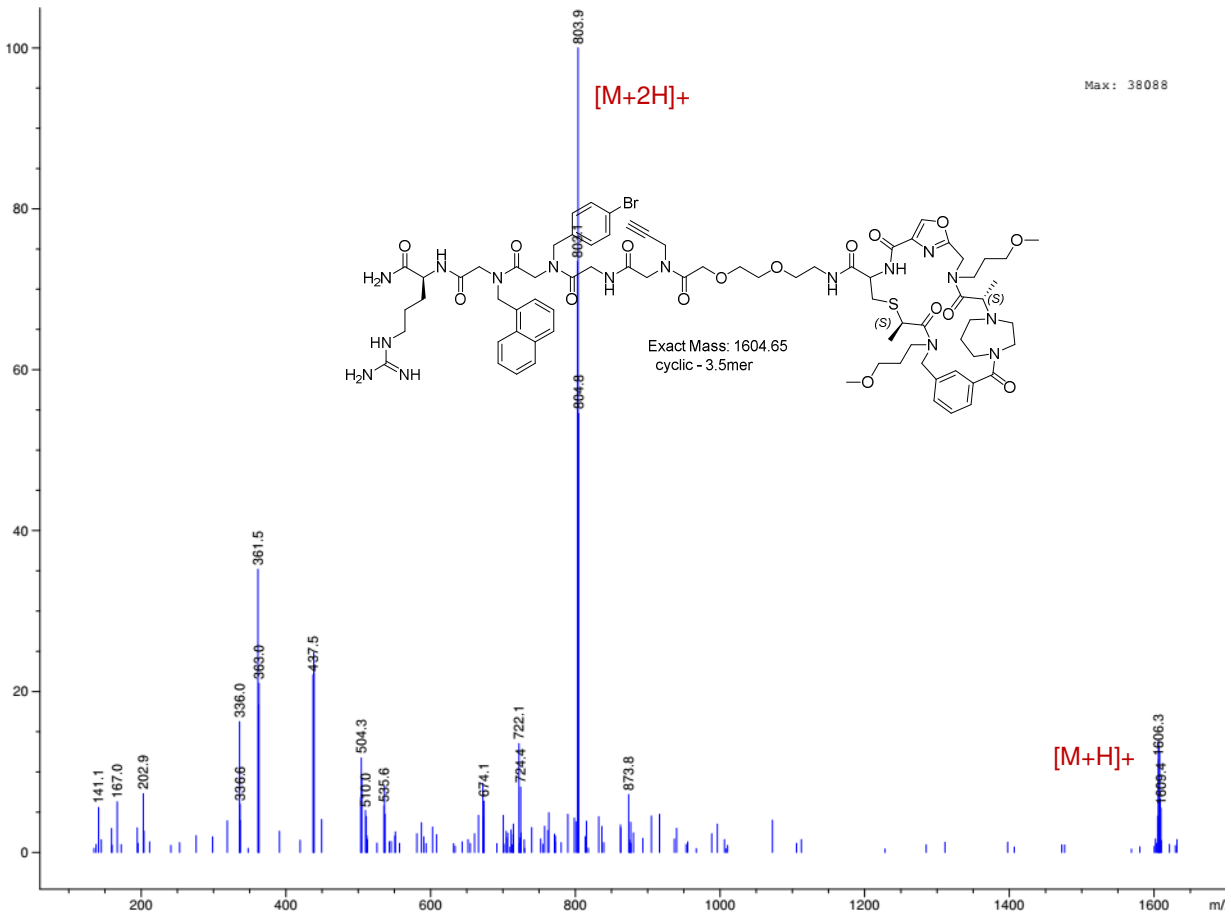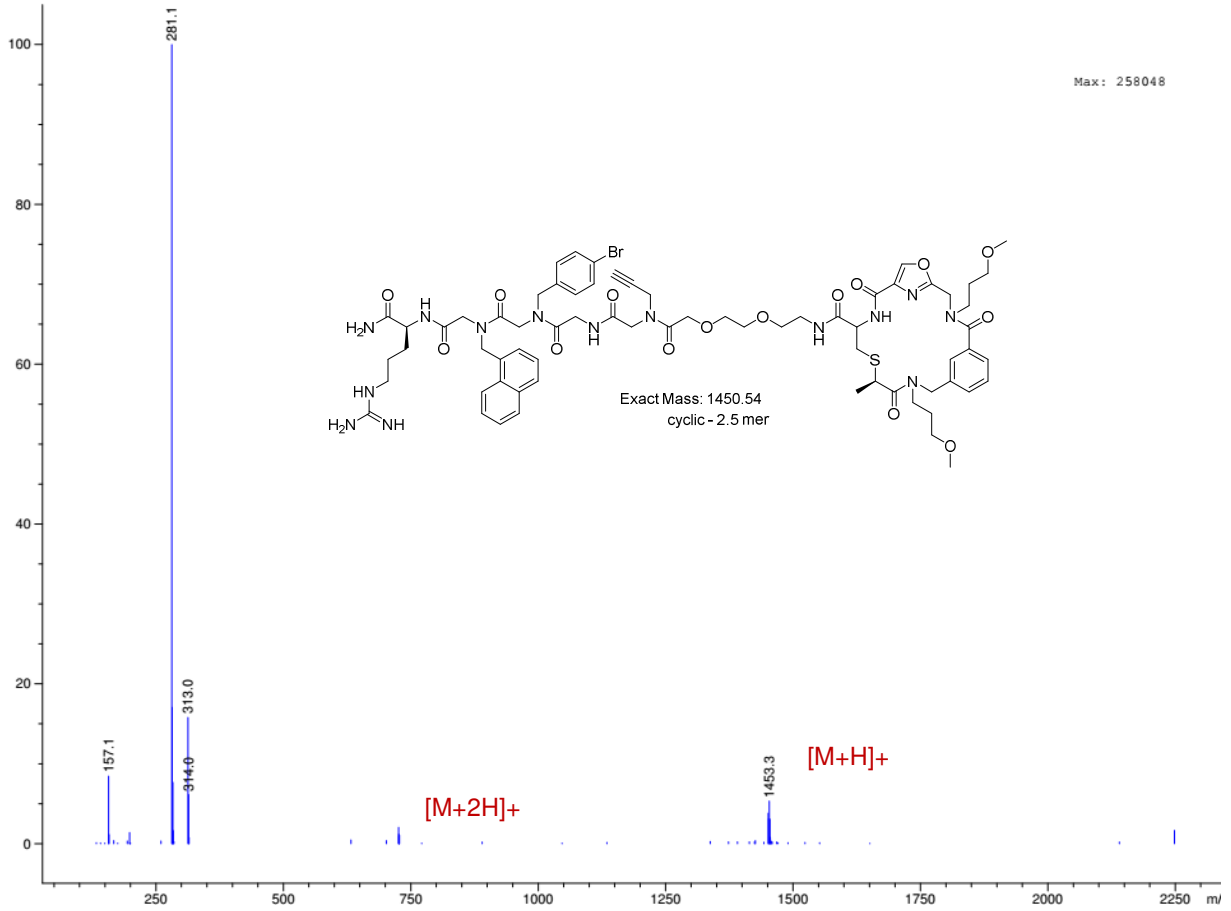

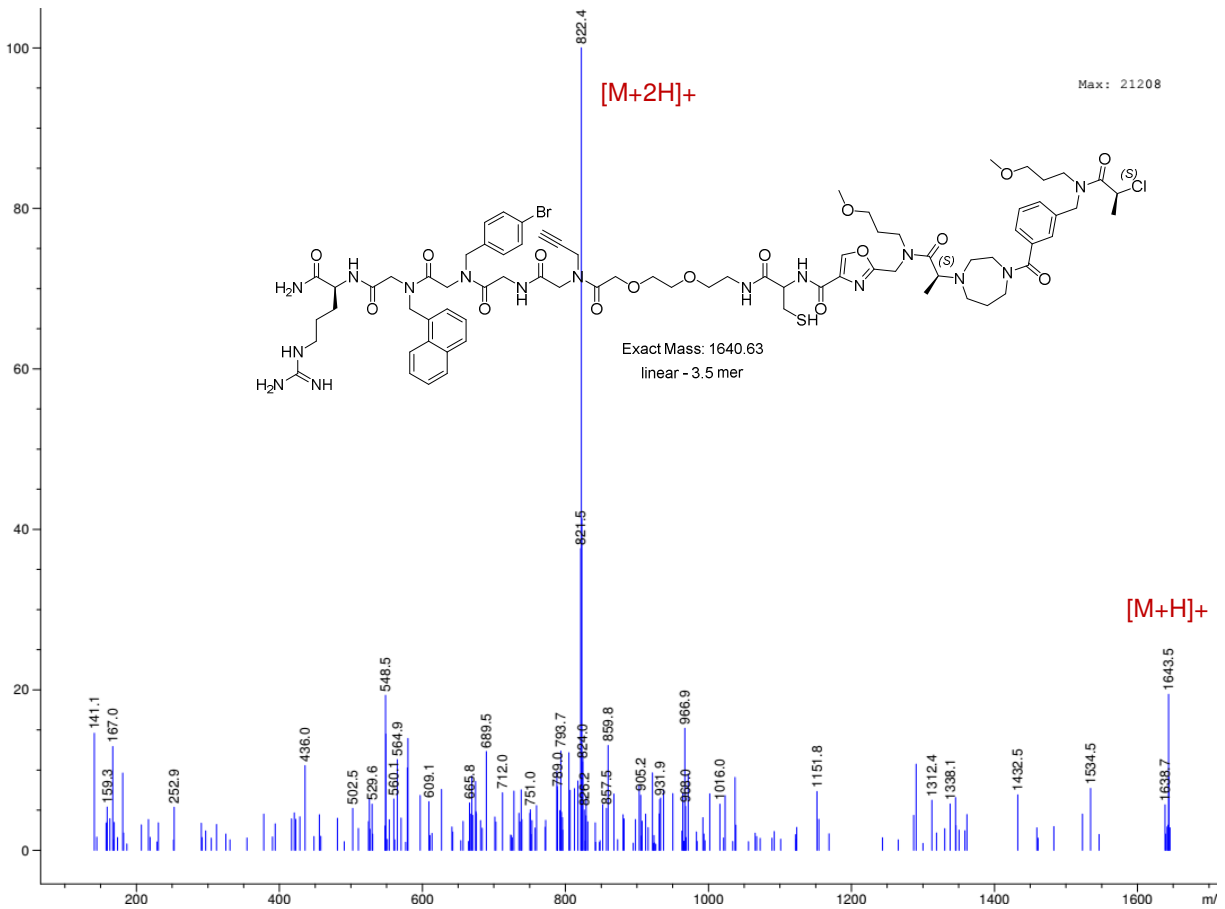

**L8-[BBB]:** Complete cyclization was observed on 10  $\mu\text{m}$  & 160  $\mu\text{m}$  beads.

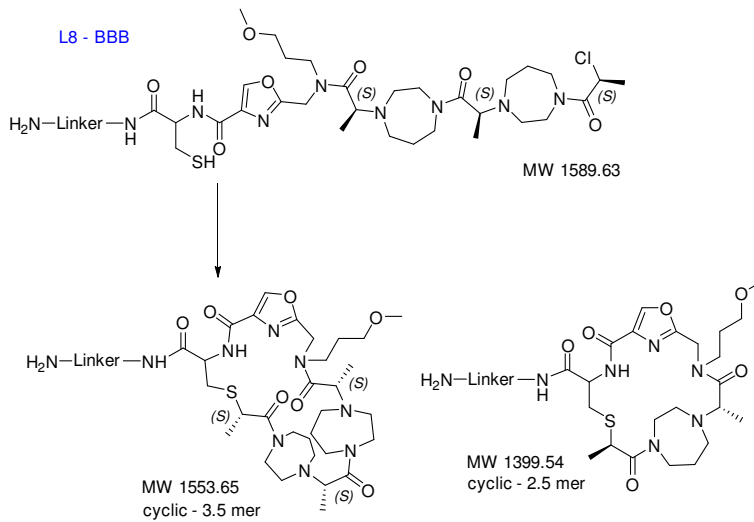

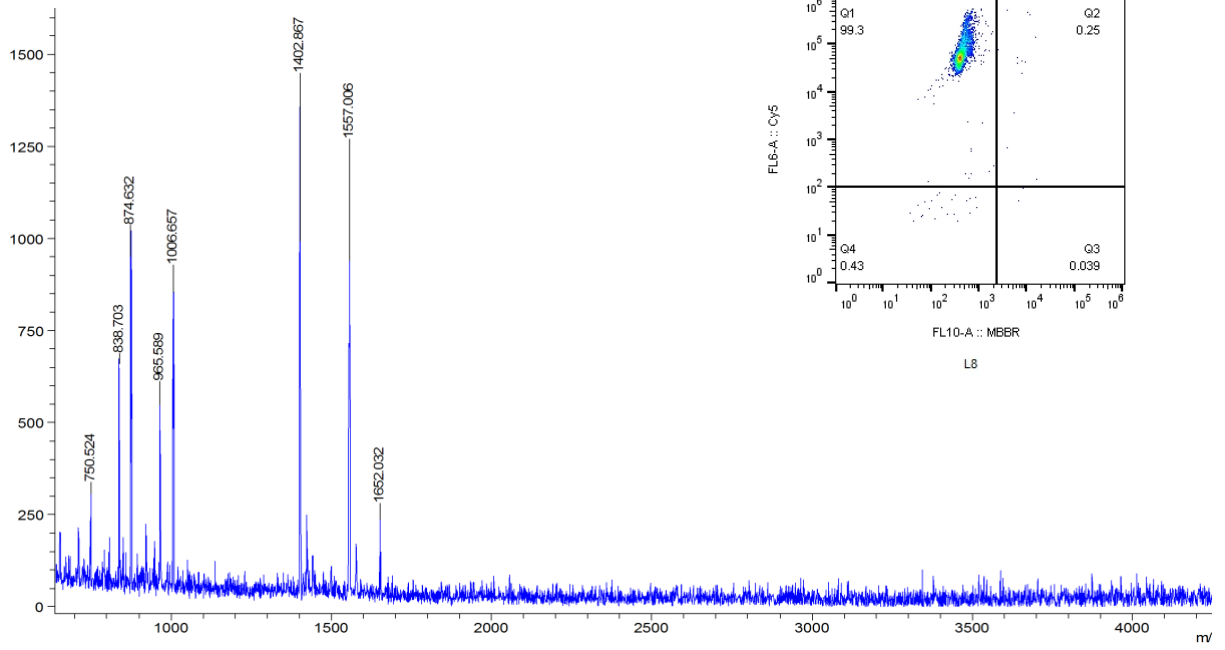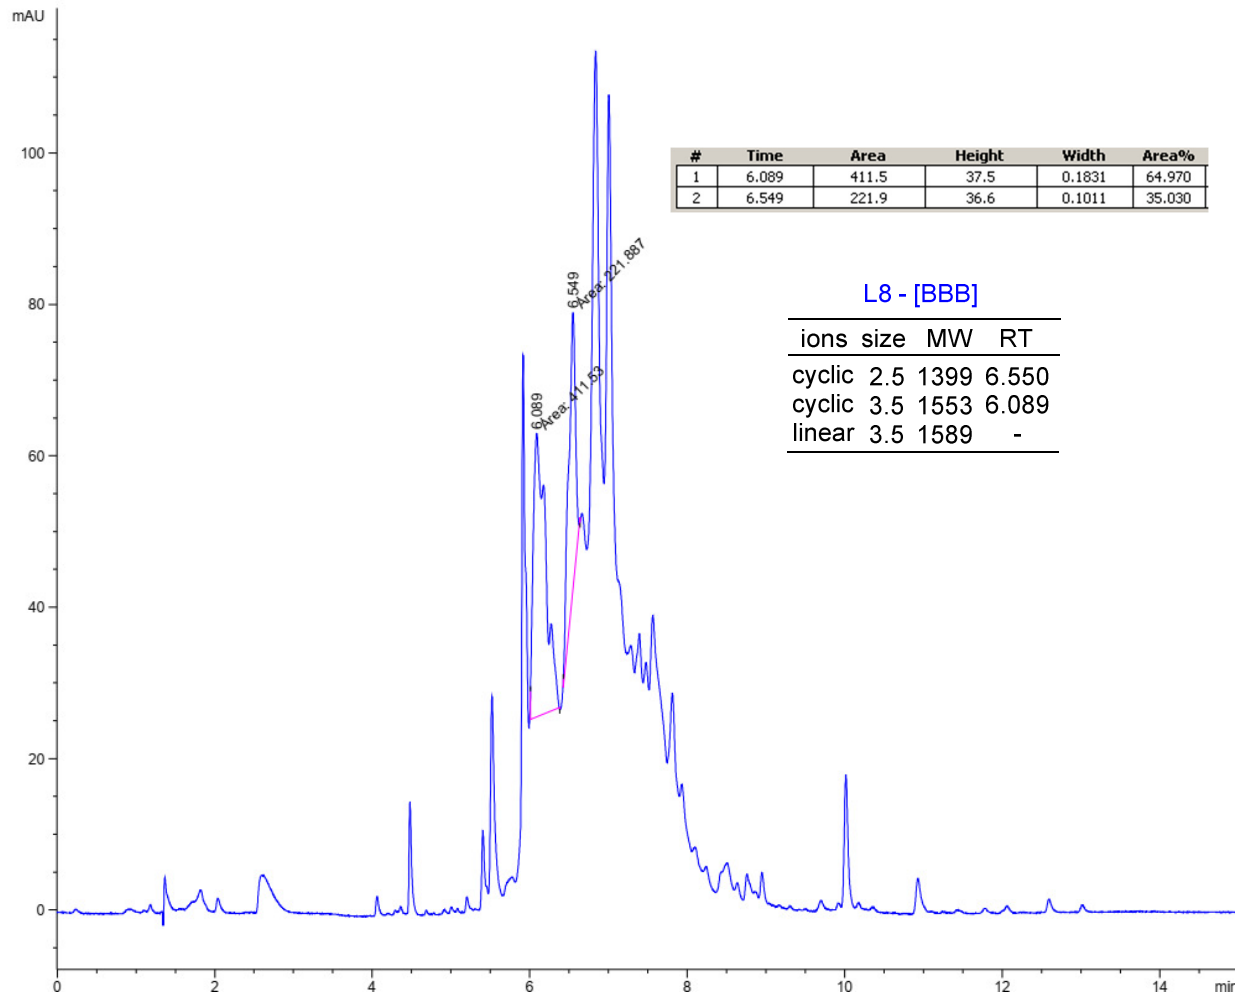

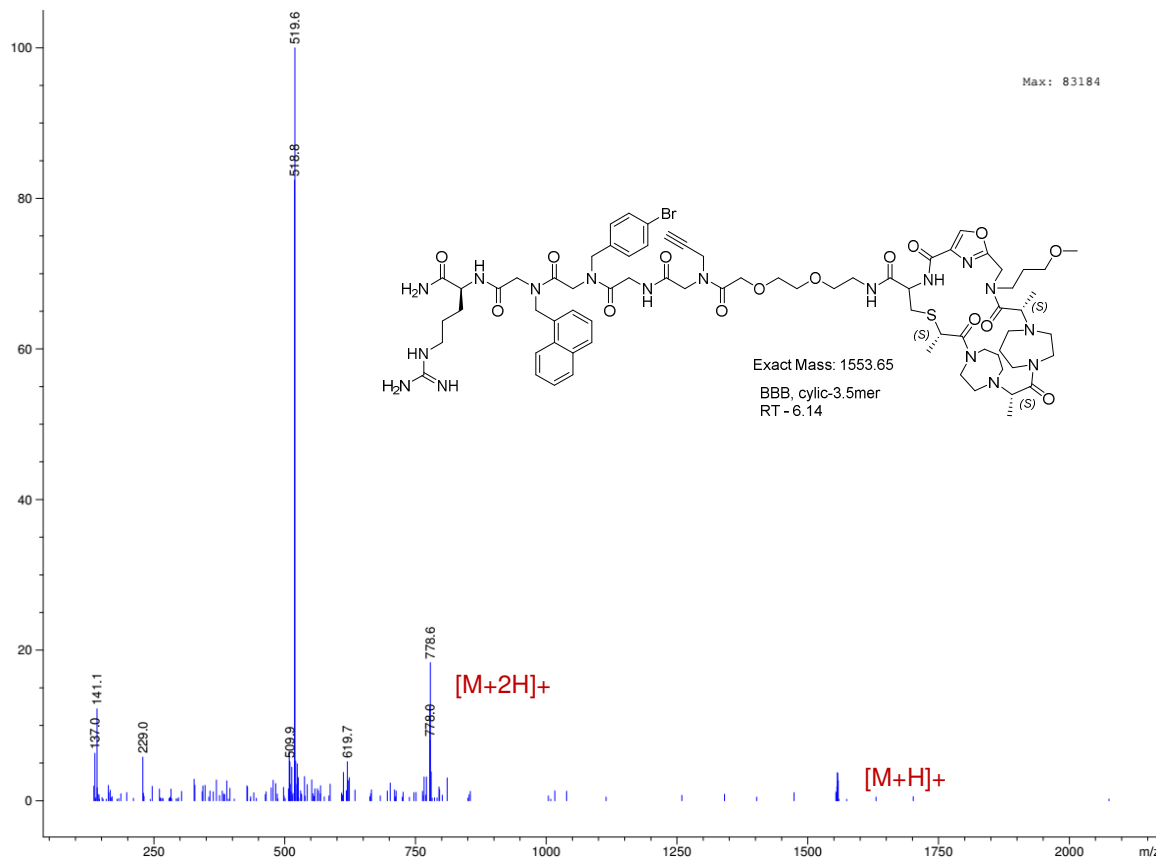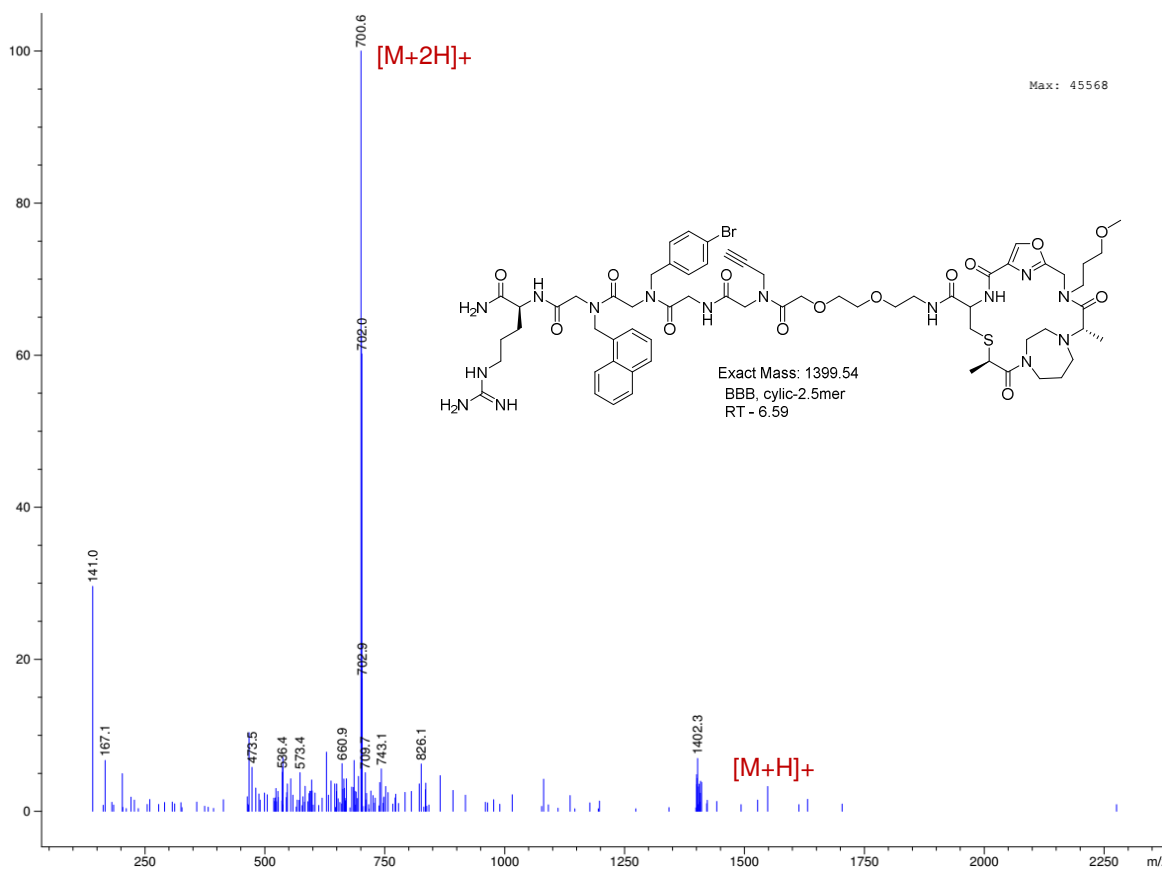

**L9-[BCB]:** Complete cyclization was observed on 10  $\mu\text{m}$  & 160  $\mu\text{m}$  beads. A linear (2.5mer) fragment could not cyclize (MW 1478, RT- 8.124). Other fragments (2.5mers) cyclized and identified.

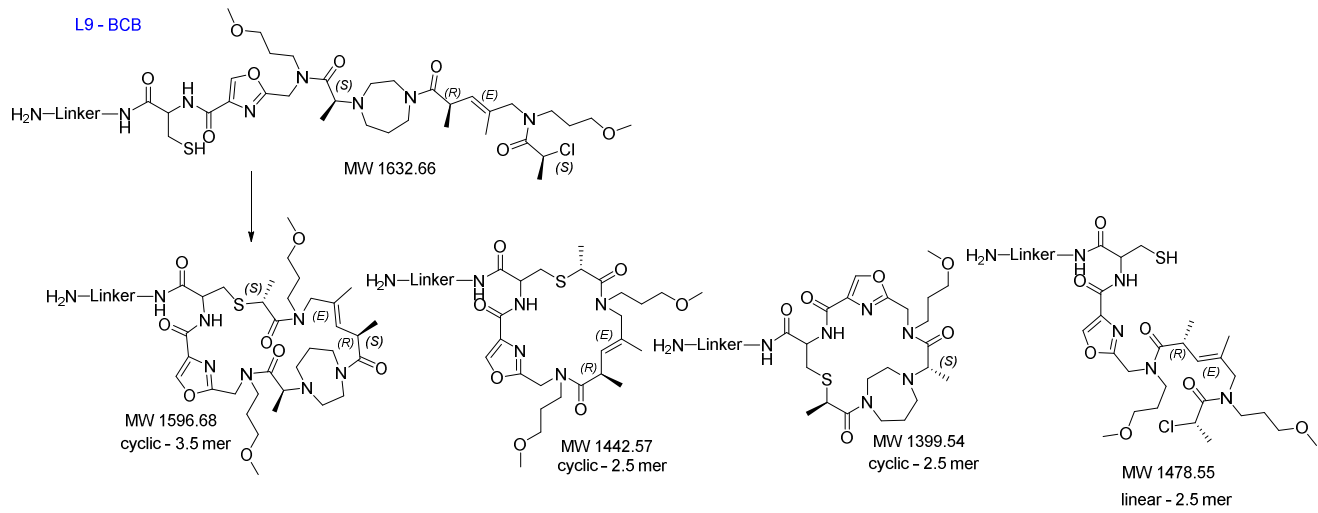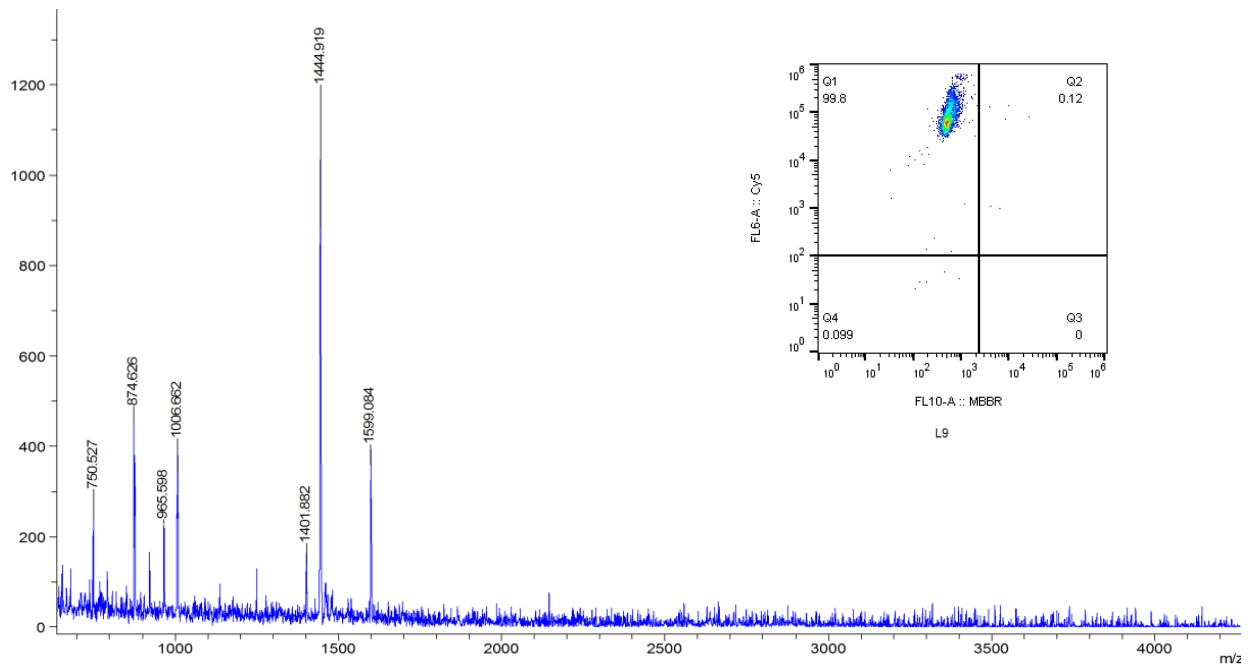

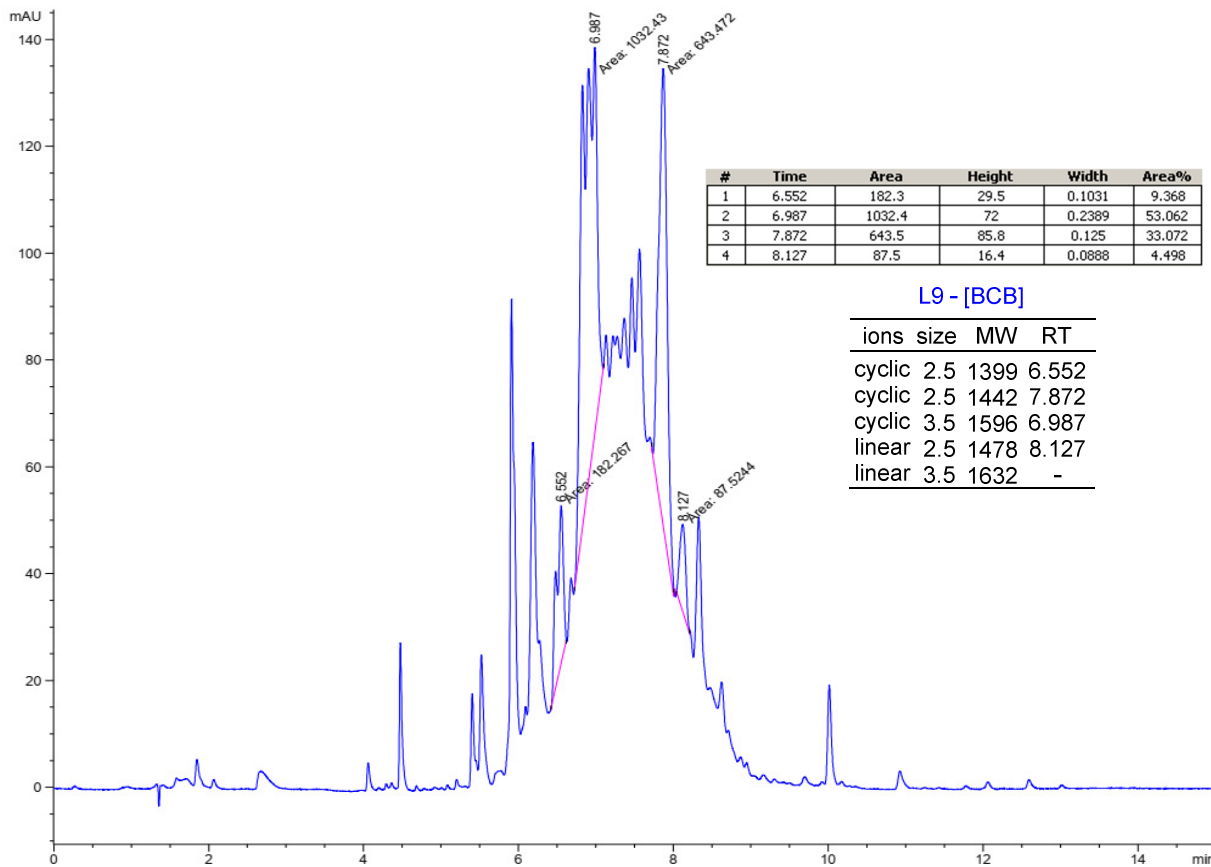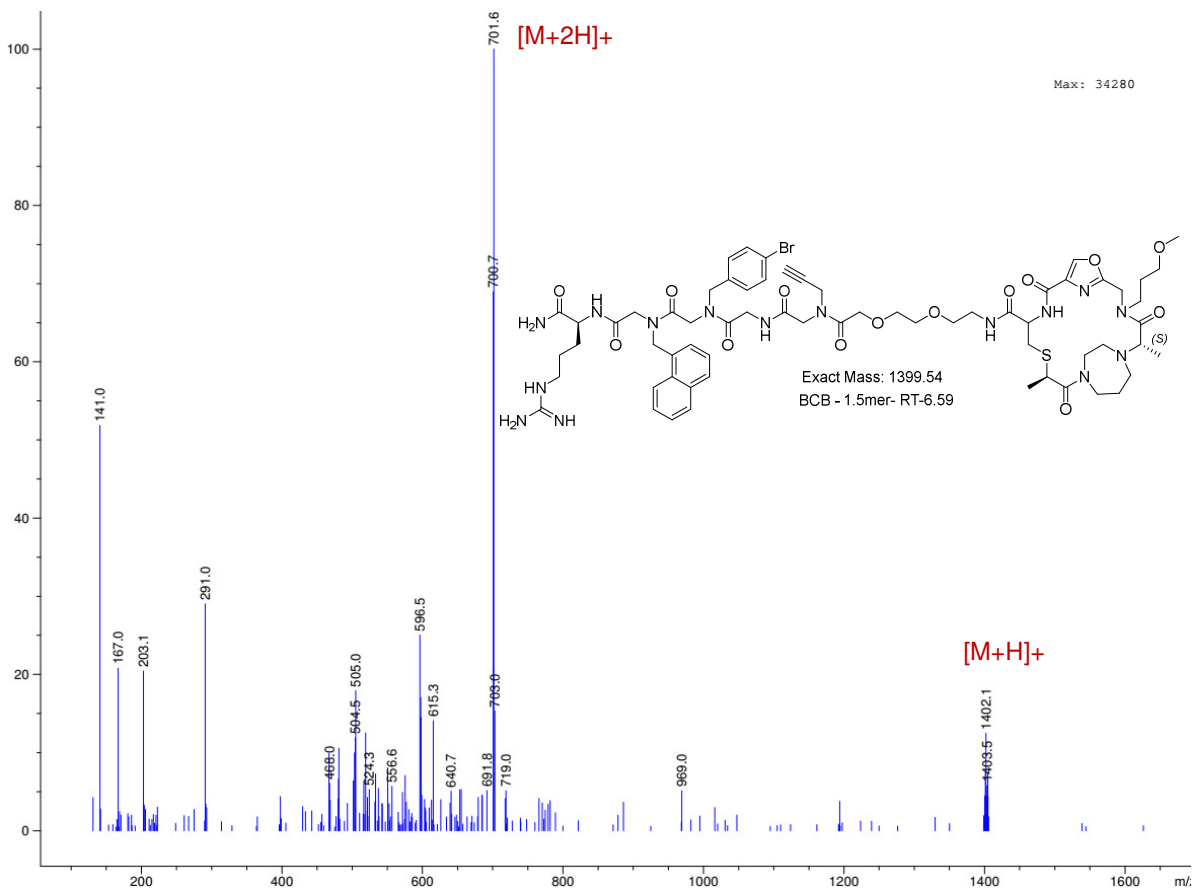

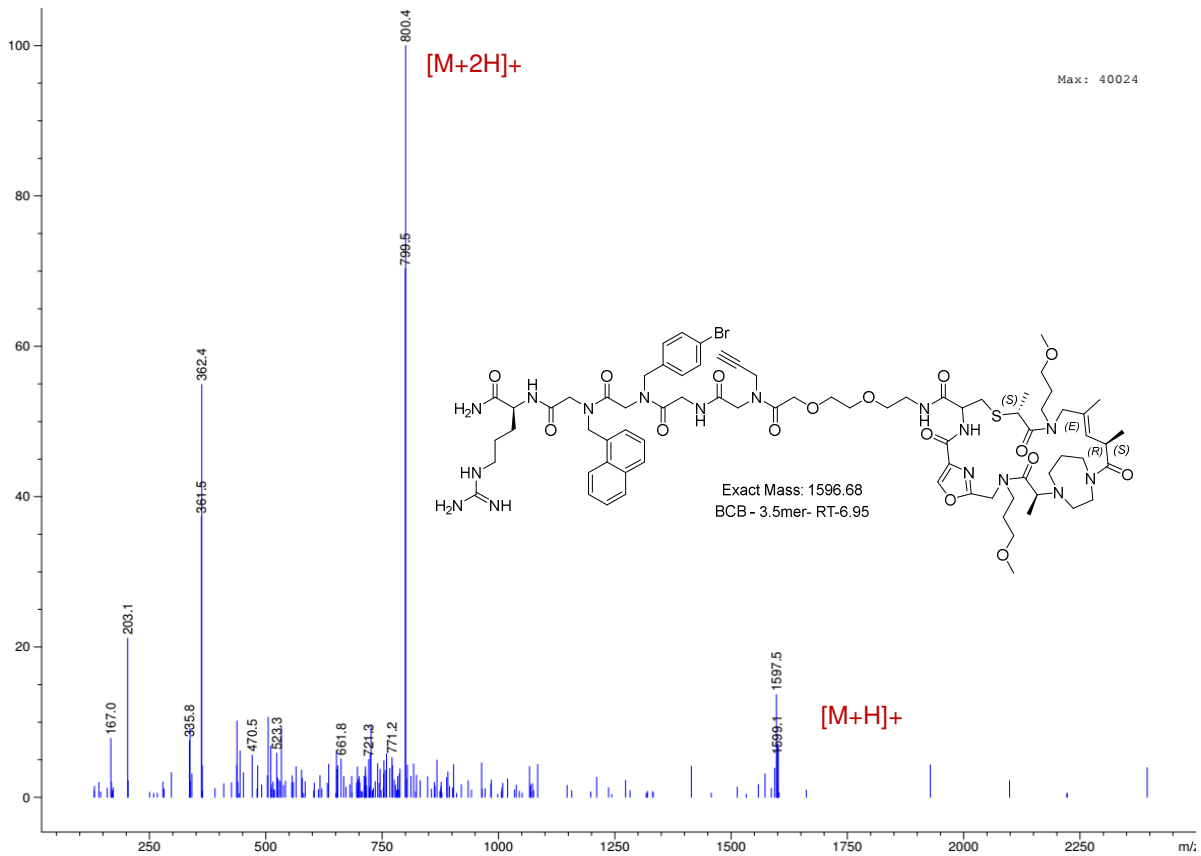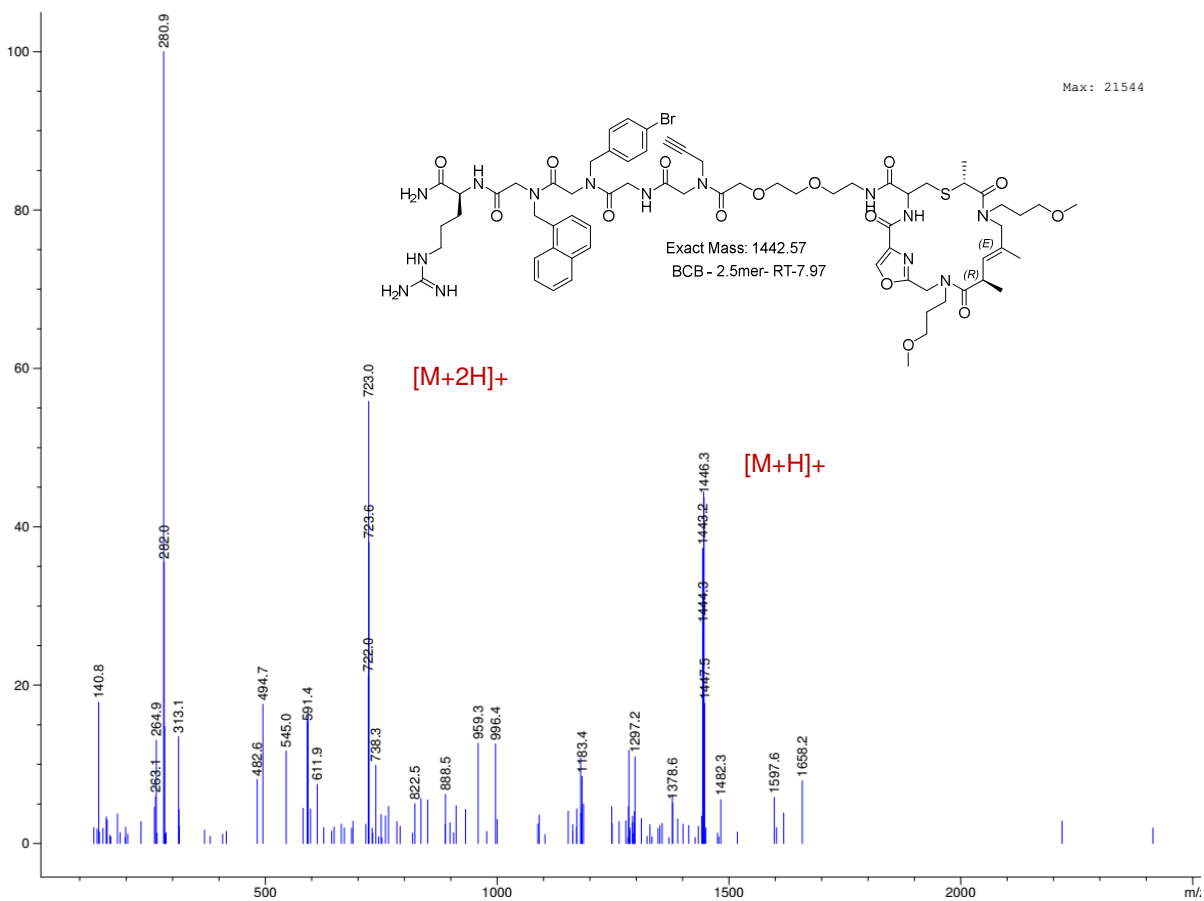

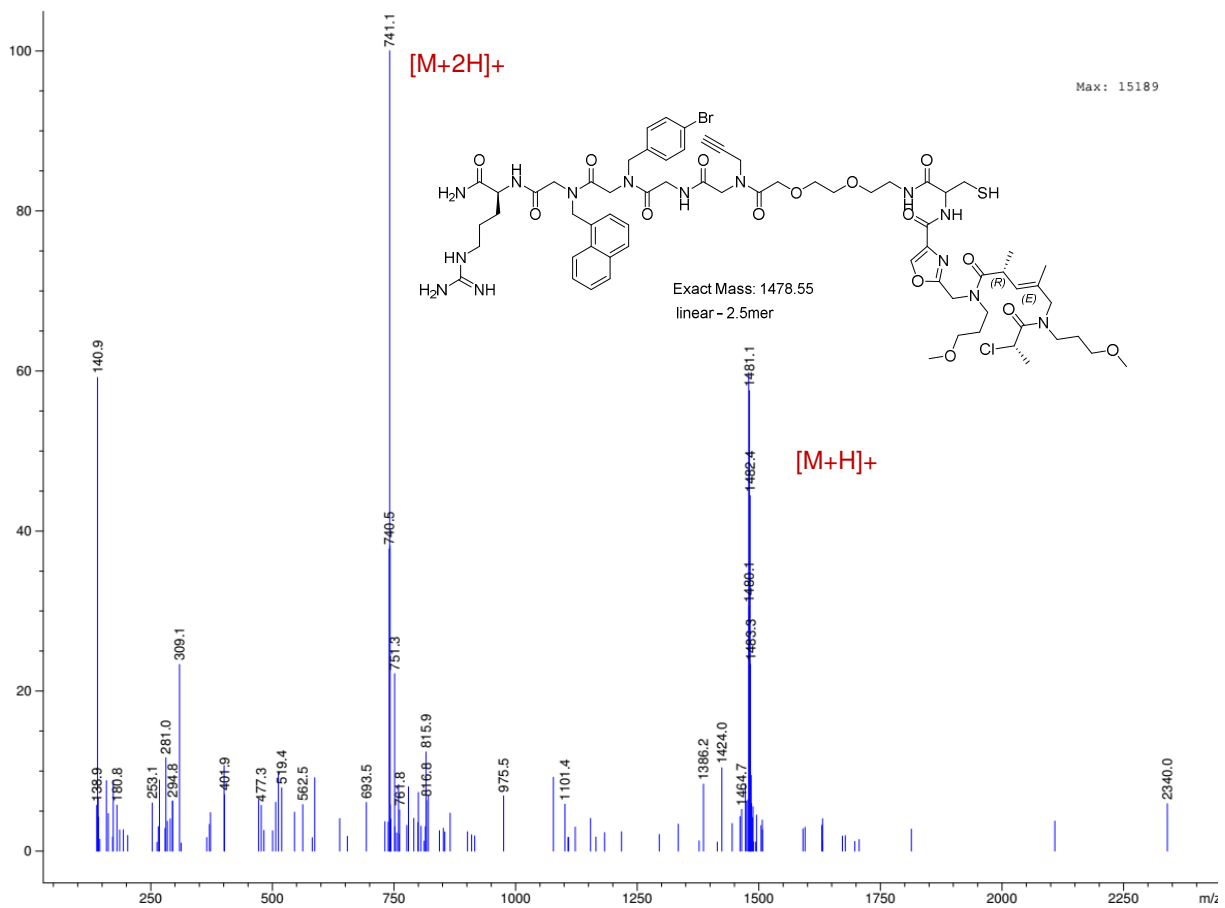

**L10-[BDB]:** Complete cyclization was detected on 10  $\mu\text{m}$  but was incomplete on 160  $\mu\text{m}$ .

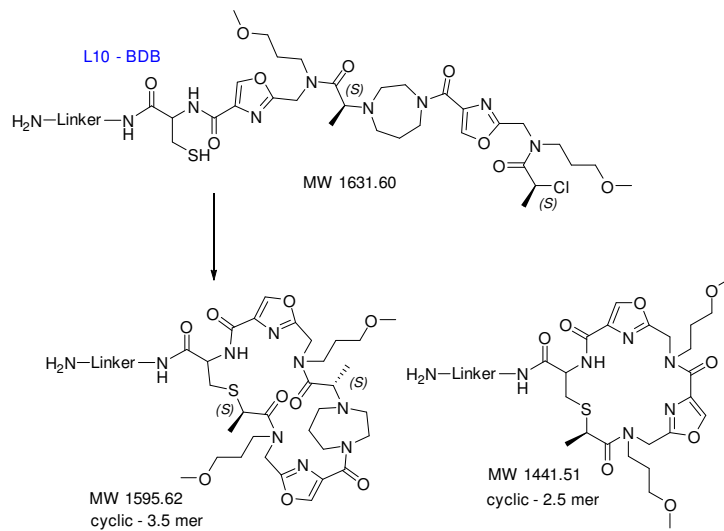



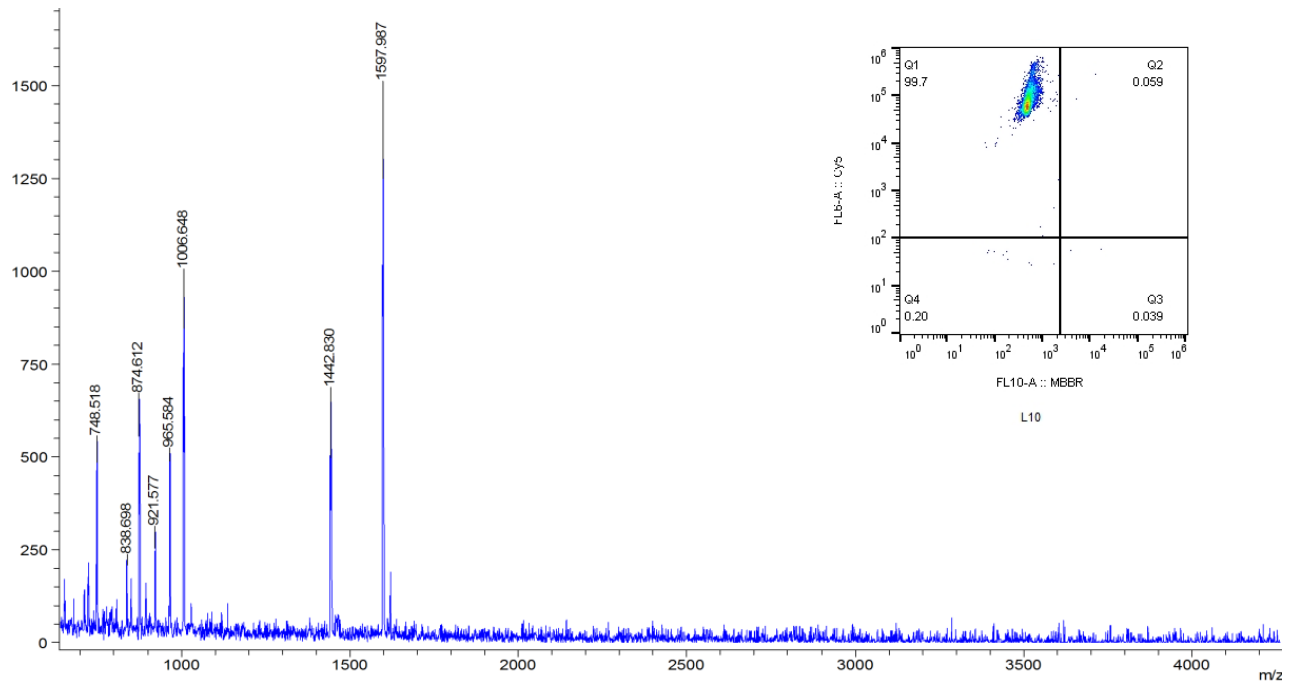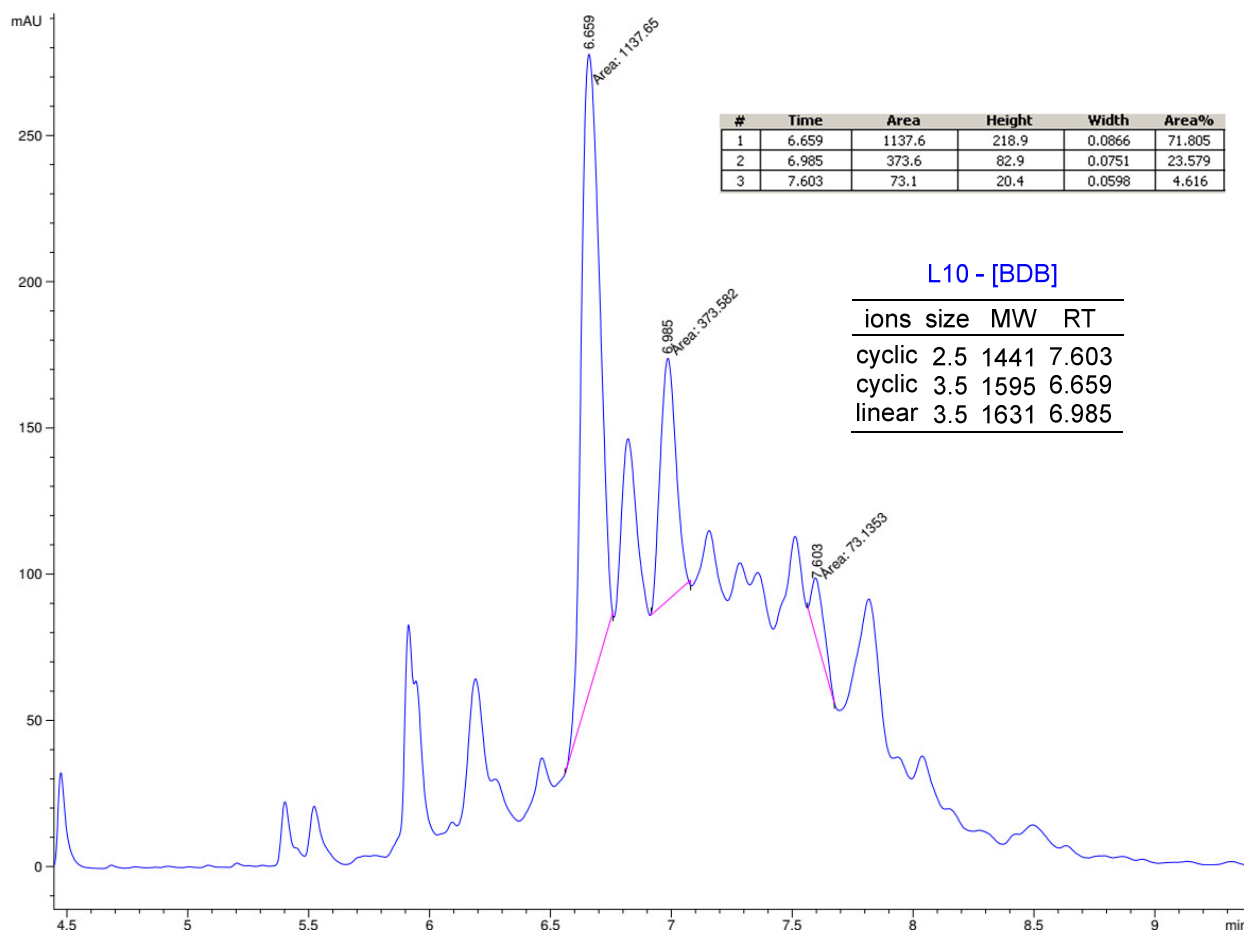

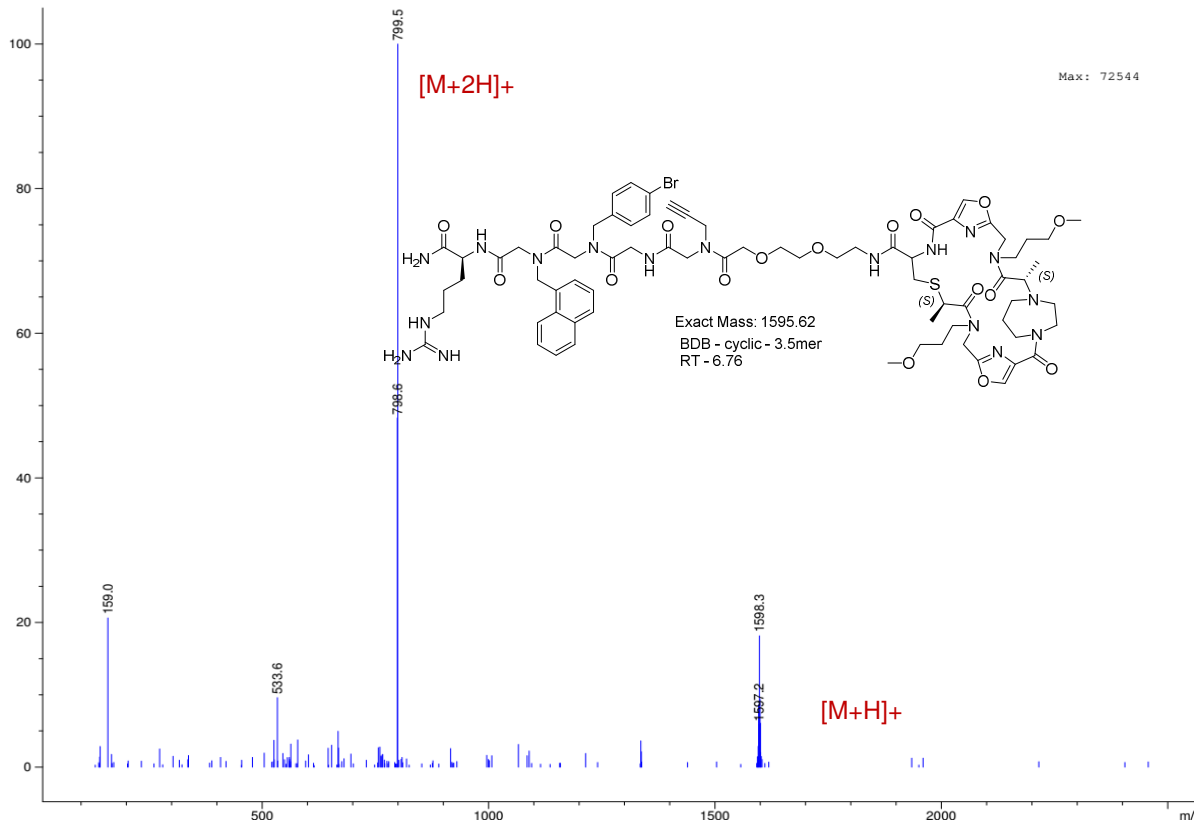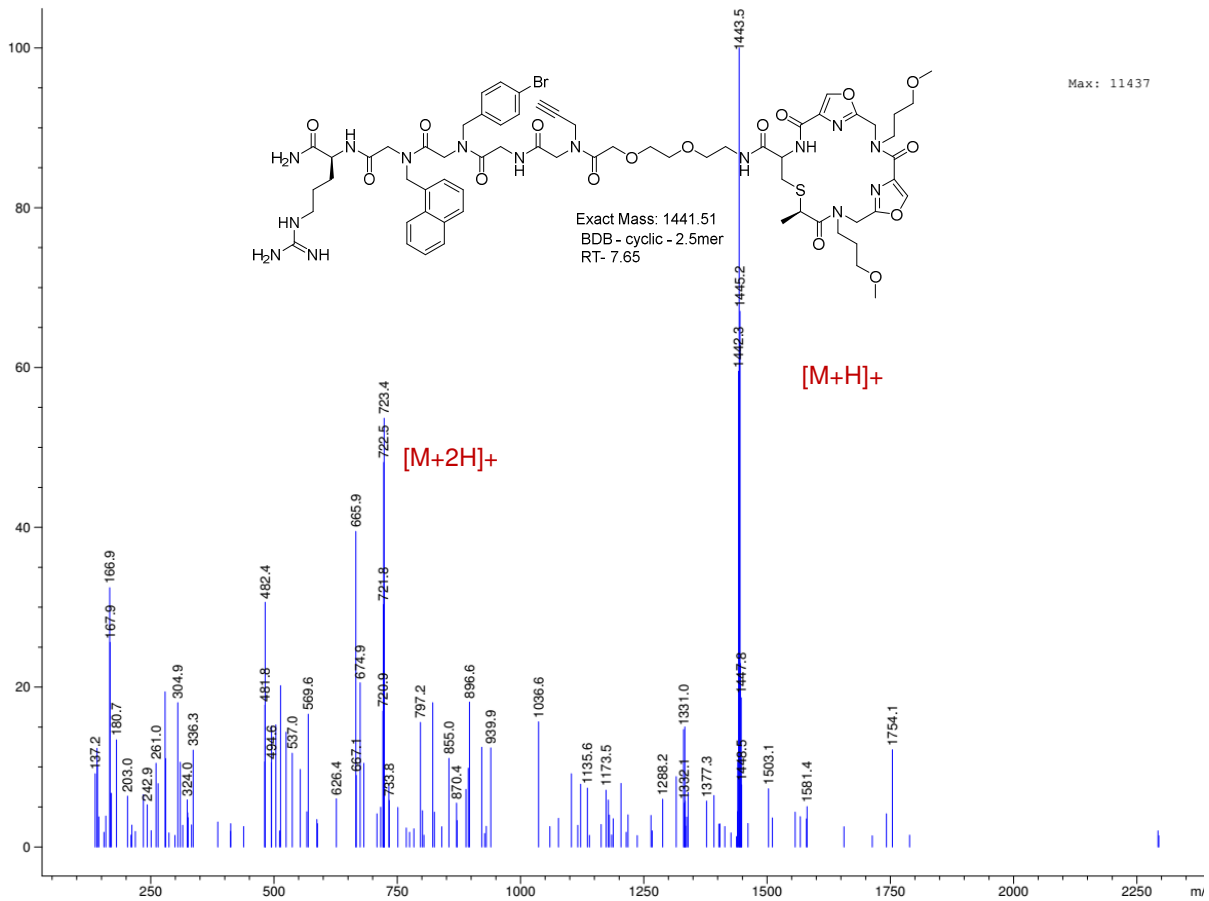

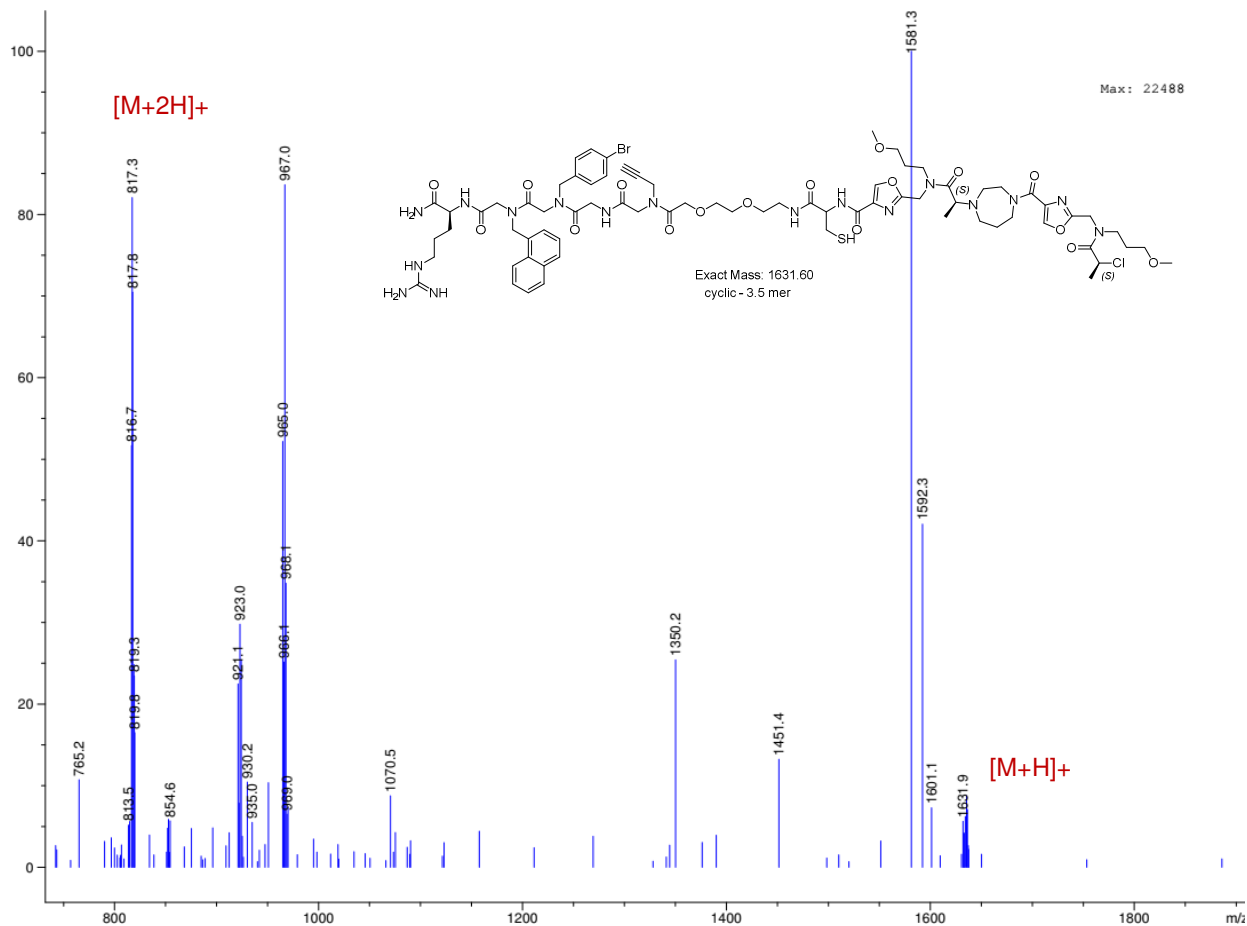

**M1-[CAA]:** Complete cyclization was observed on 10  $\mu\text{m}$  & 160  $\mu\text{m}$  beads.

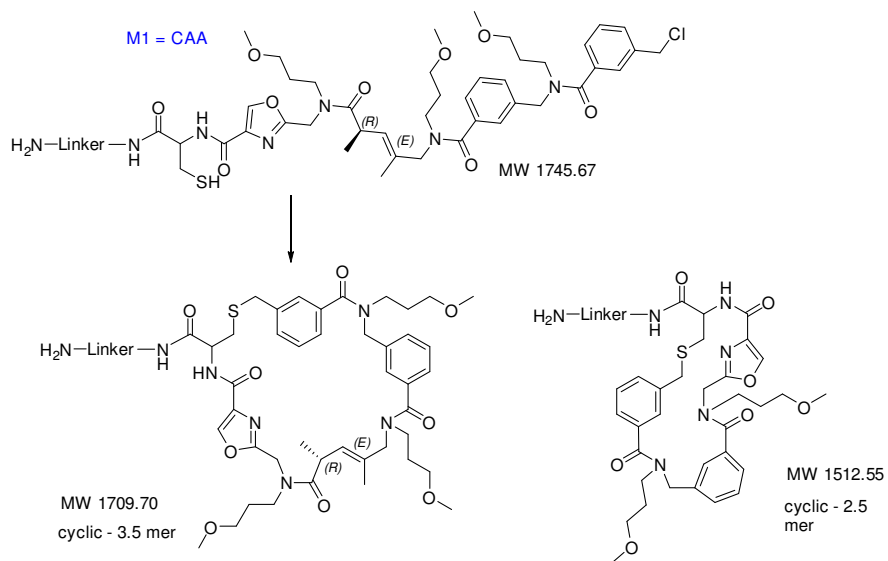

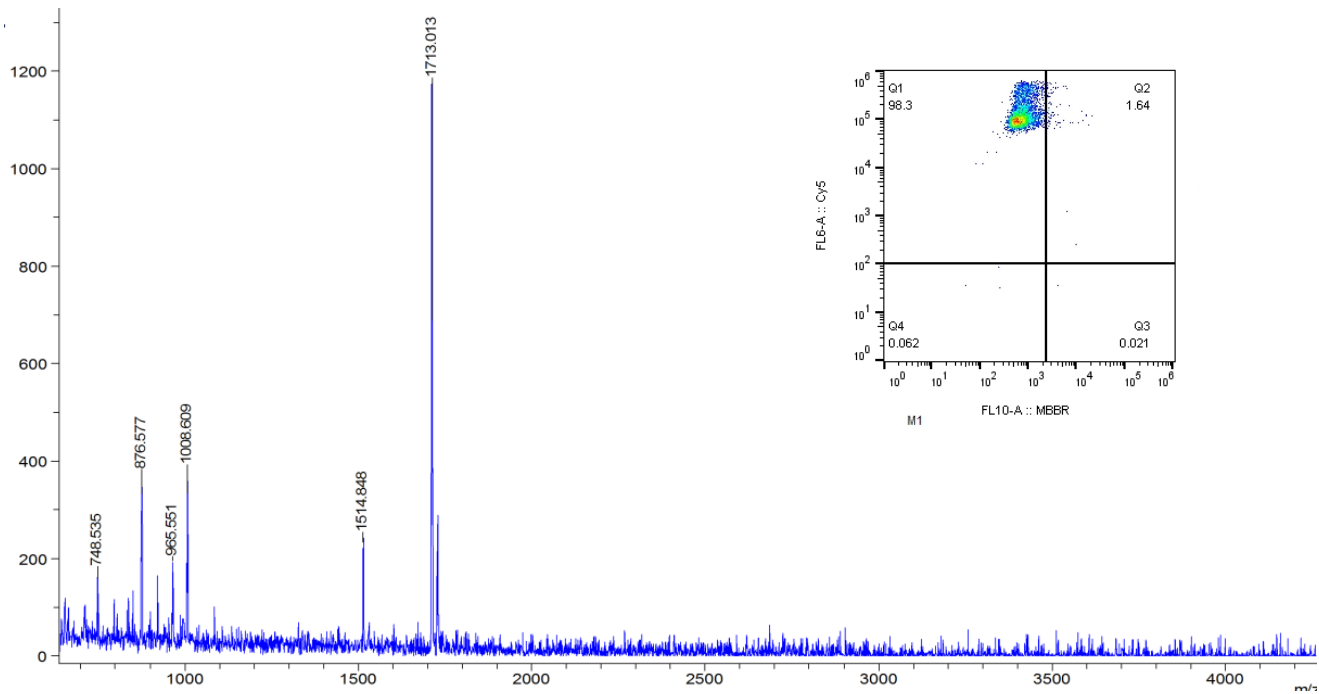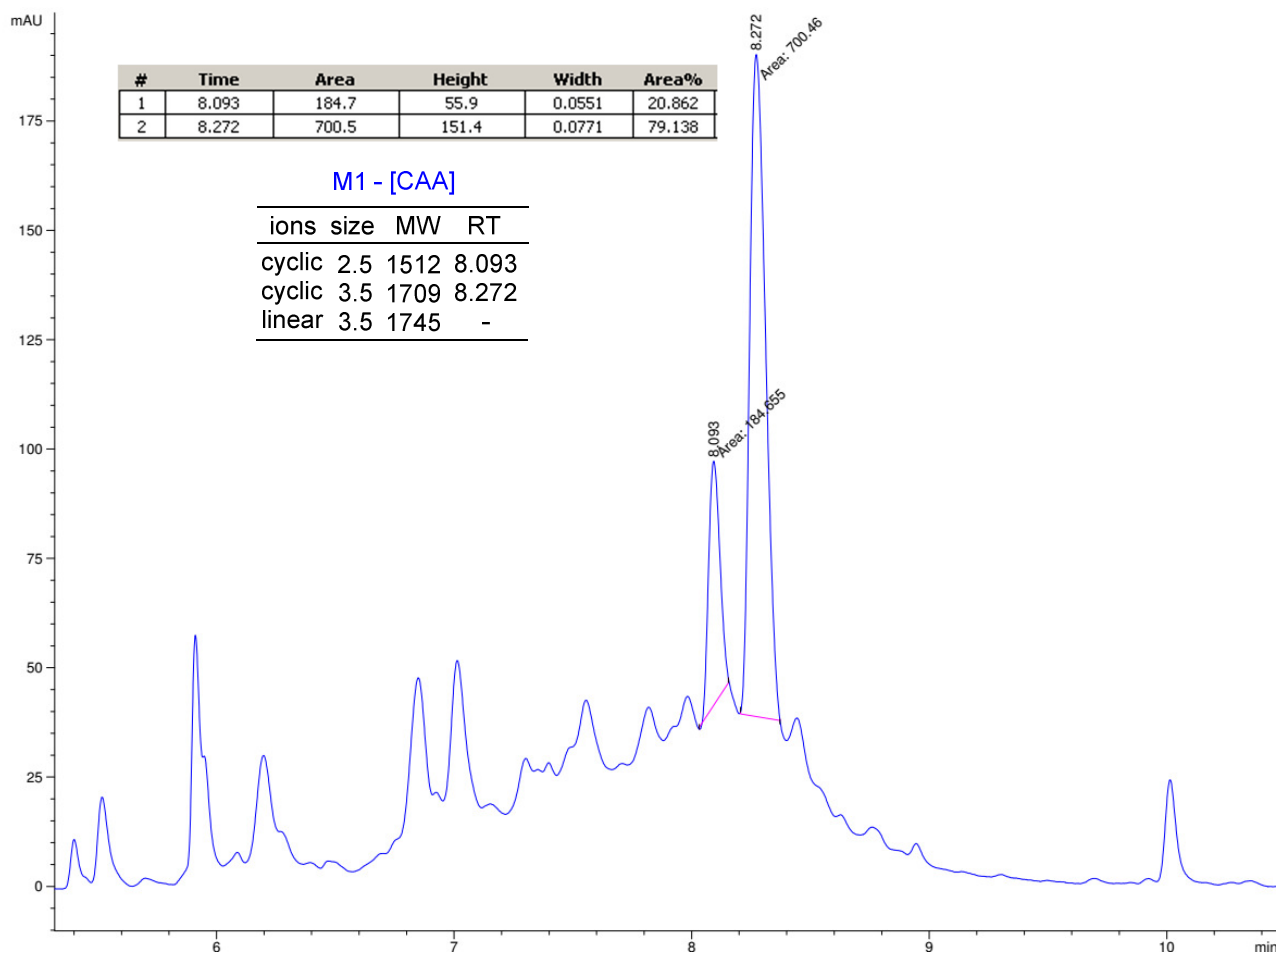

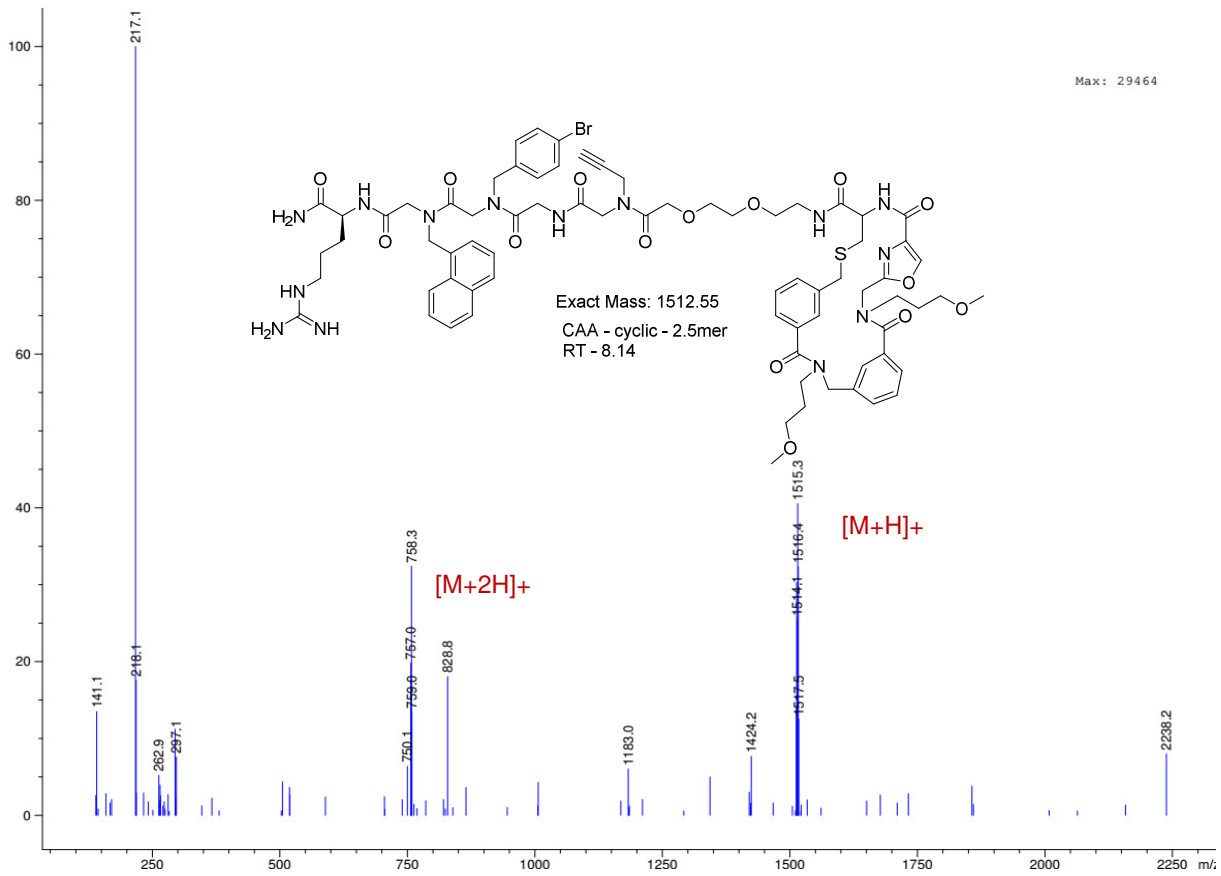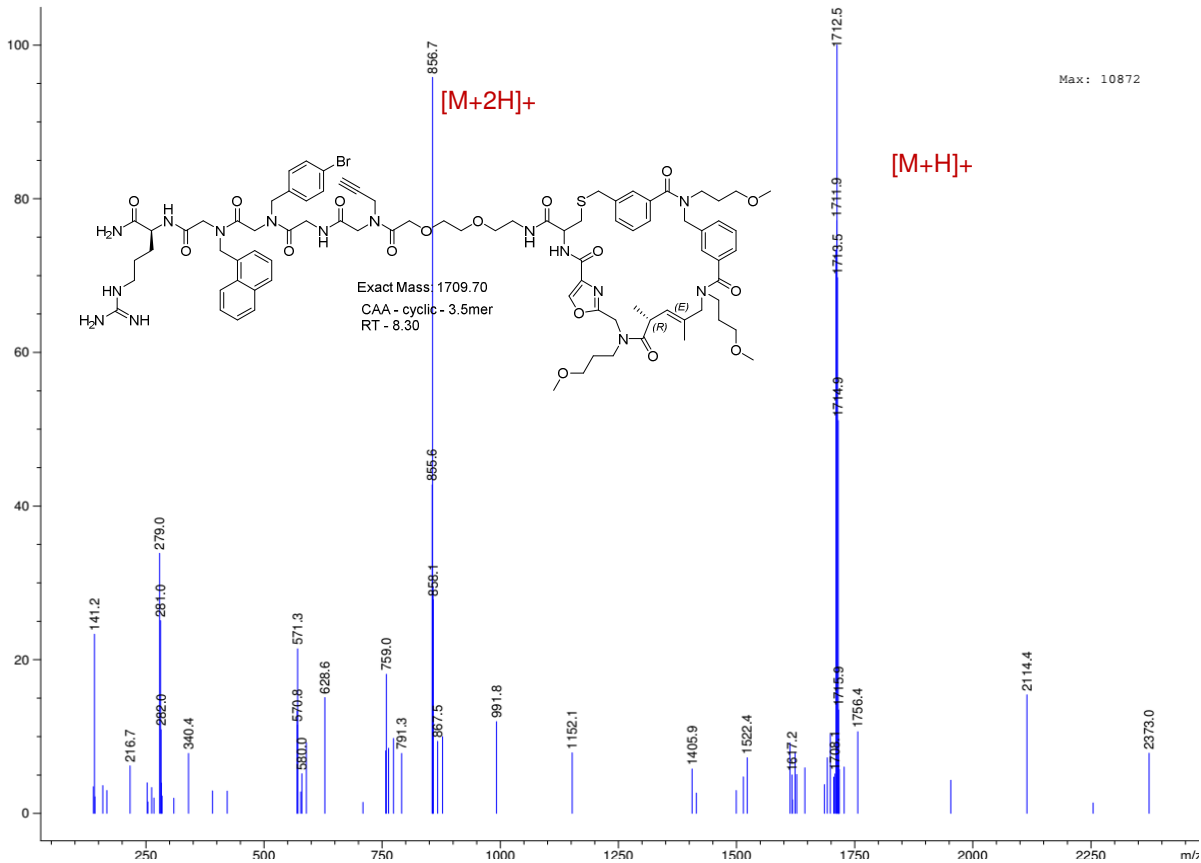

**M2-[CBA]:** Complete cyclization was observed on 10  $\mu\text{m}$  & 160  $\mu\text{m}$  beads.

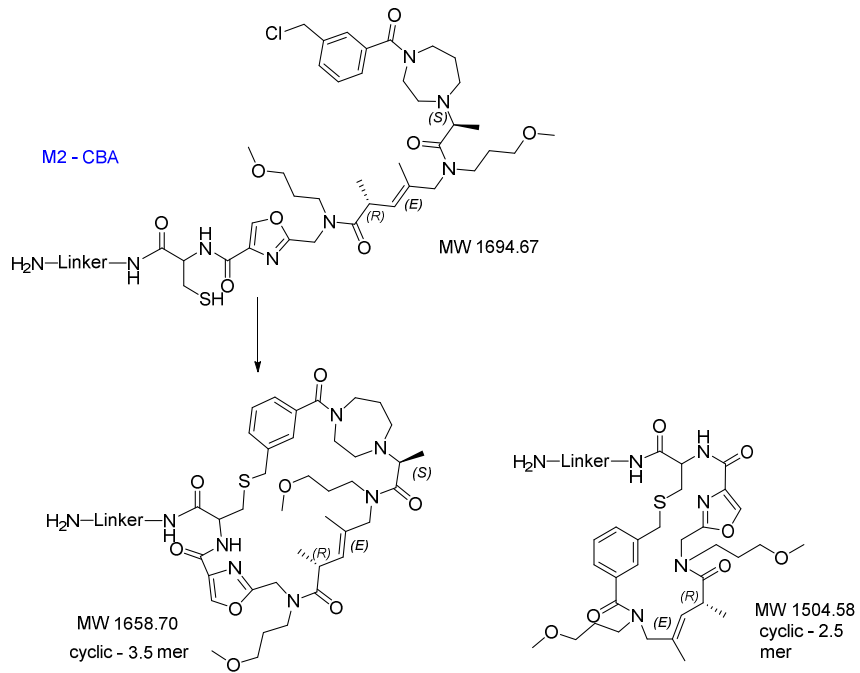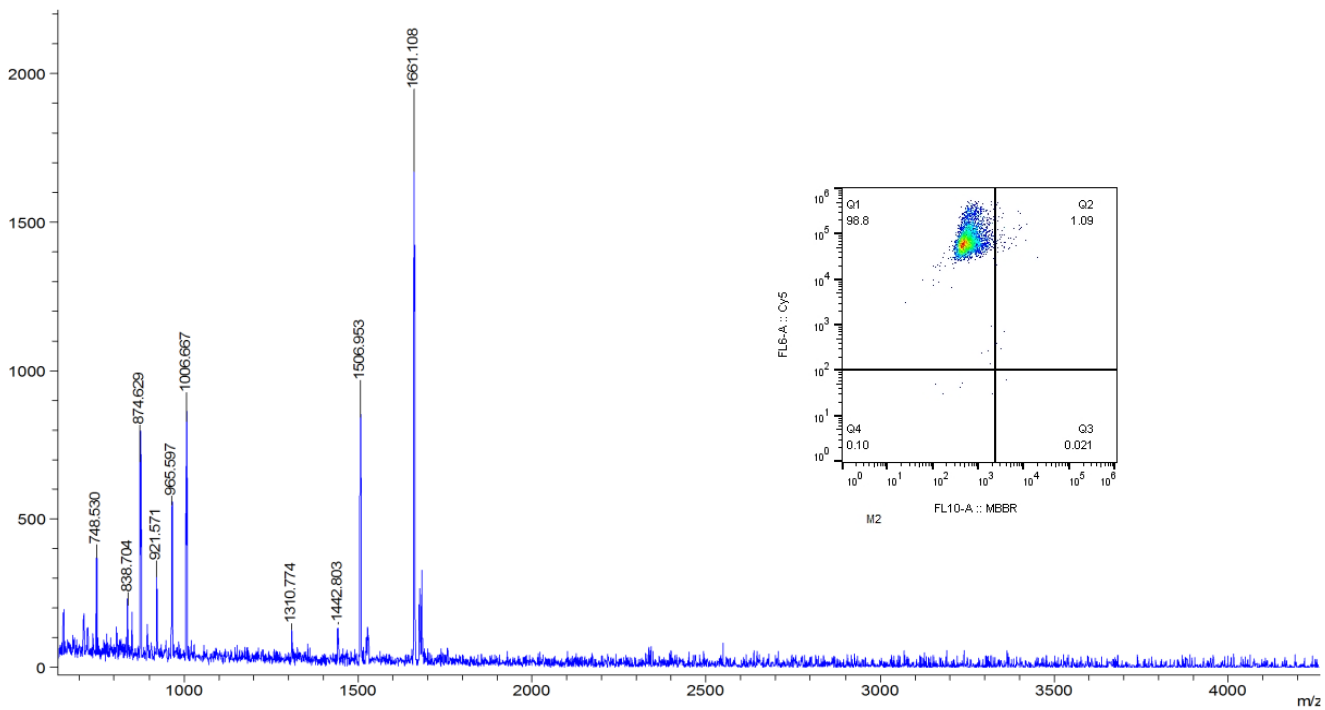

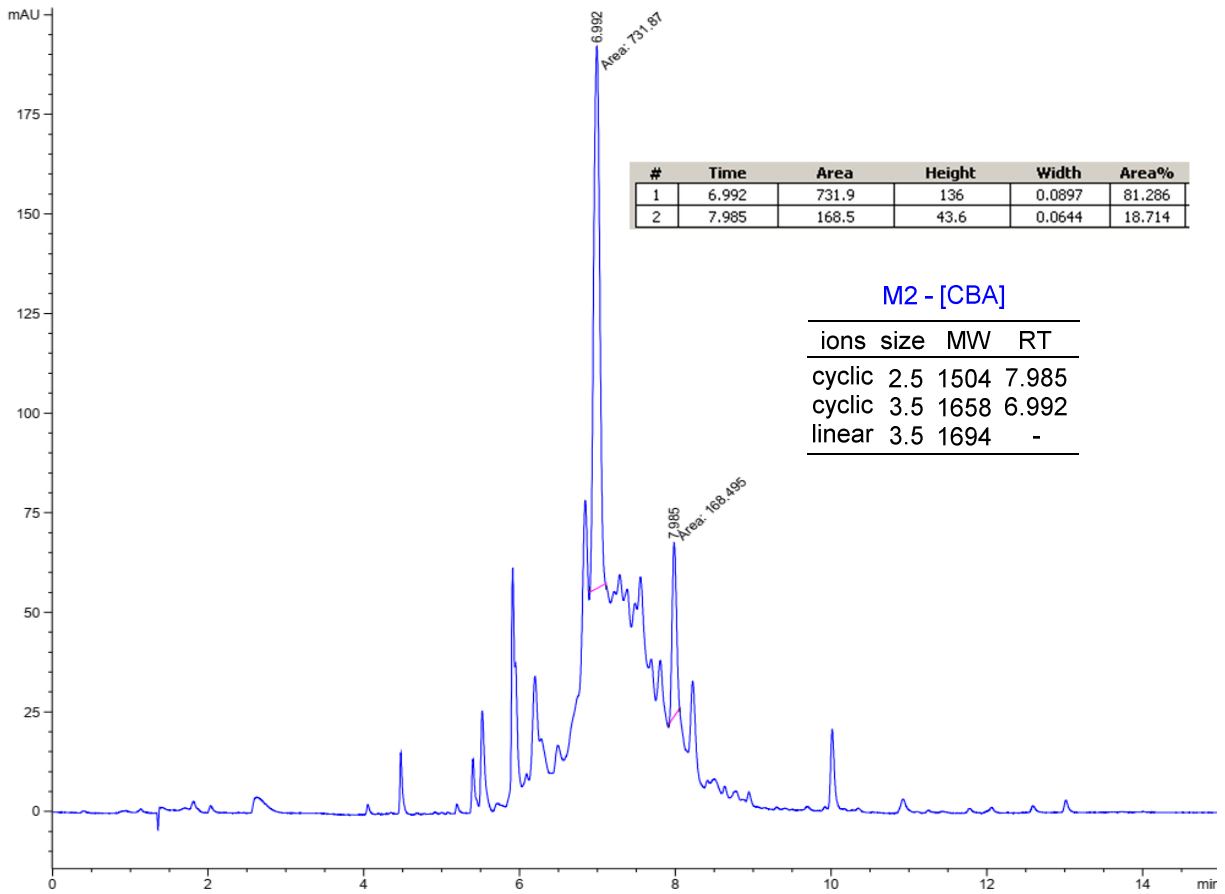

**M2 - [CBA]**

|        | ions size | MW   | RT    |
|--------|-----------|------|-------|
| cyclic | 2.5       | 1504 | 7.985 |
| cyclic | 3.5       | 1658 | 6.992 |
| linear | 3.5       | 1694 | -     |

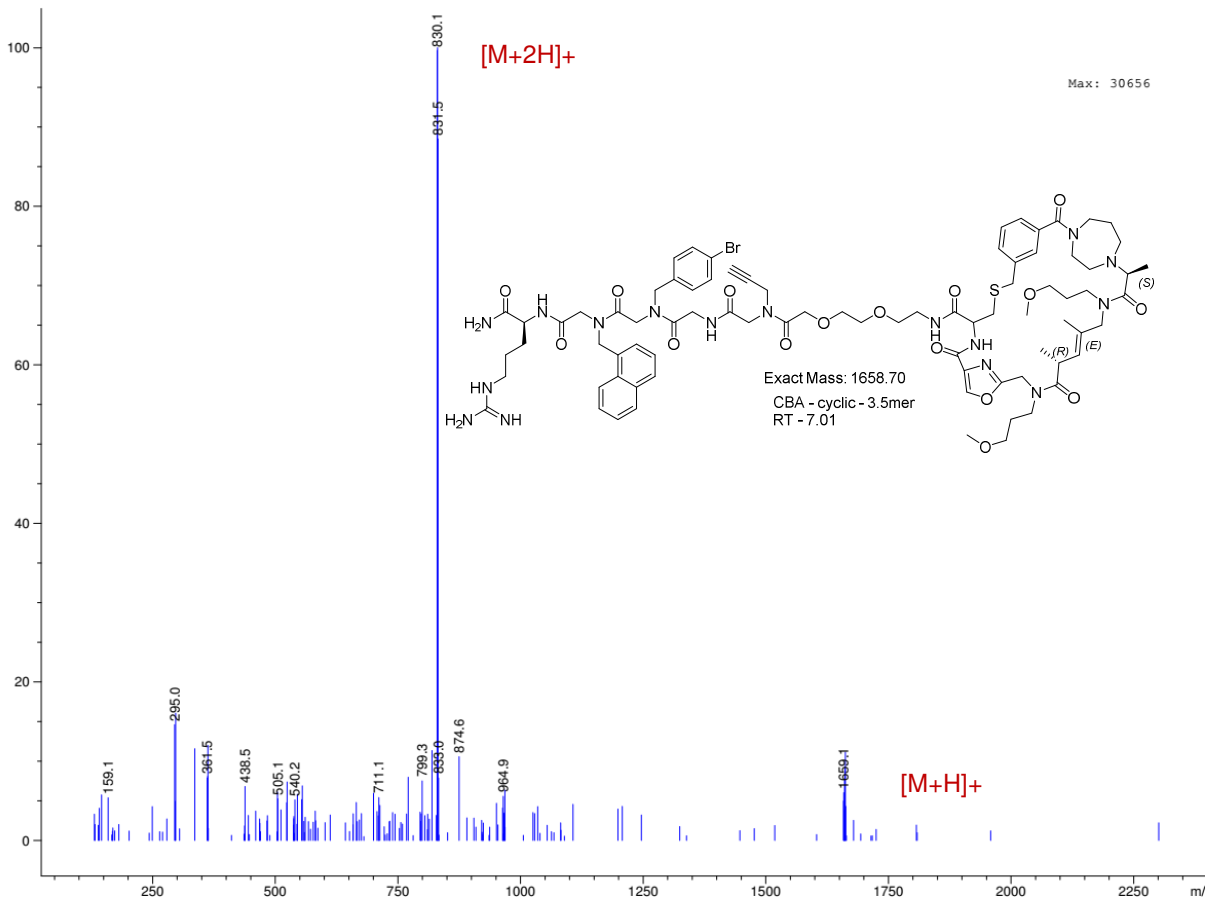





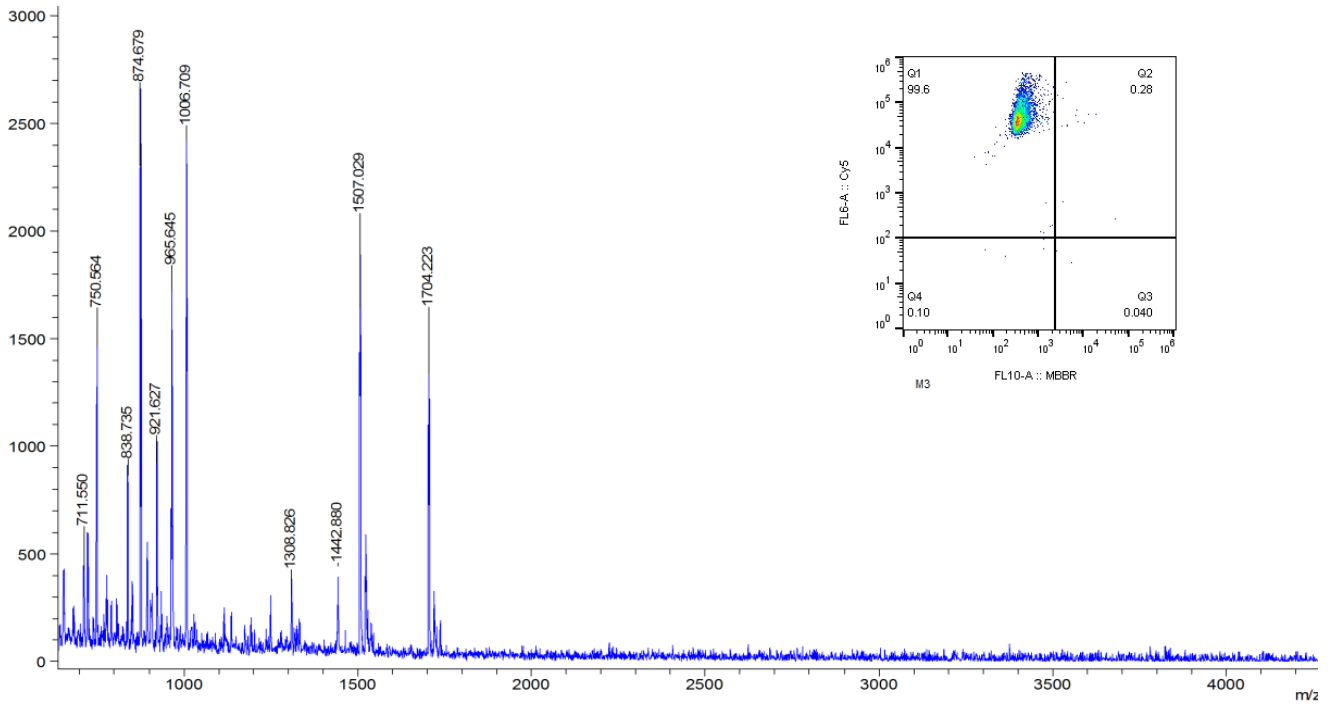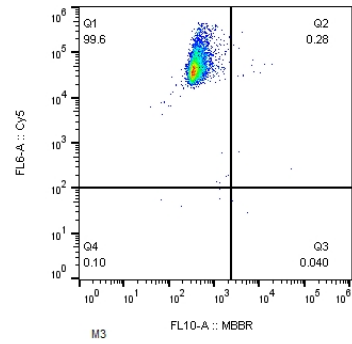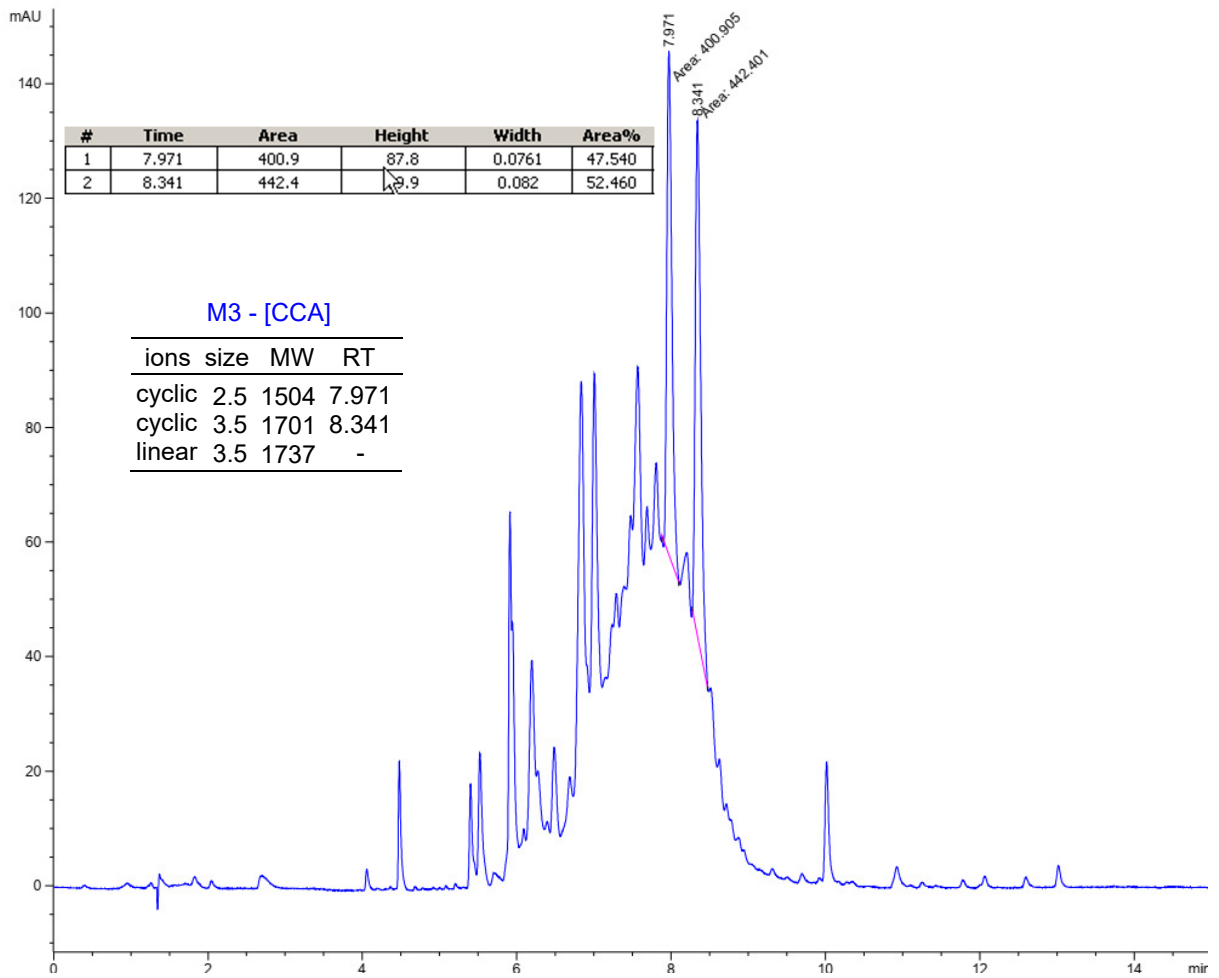

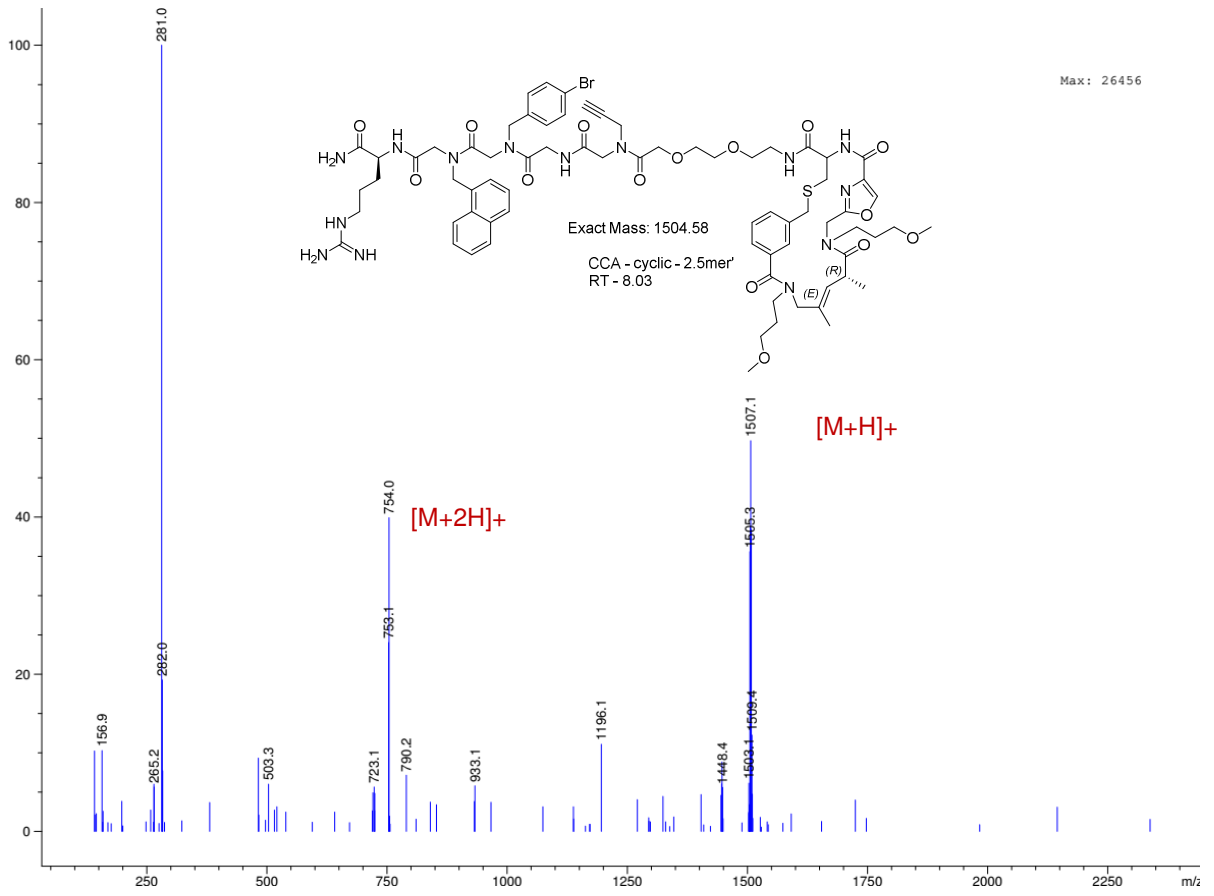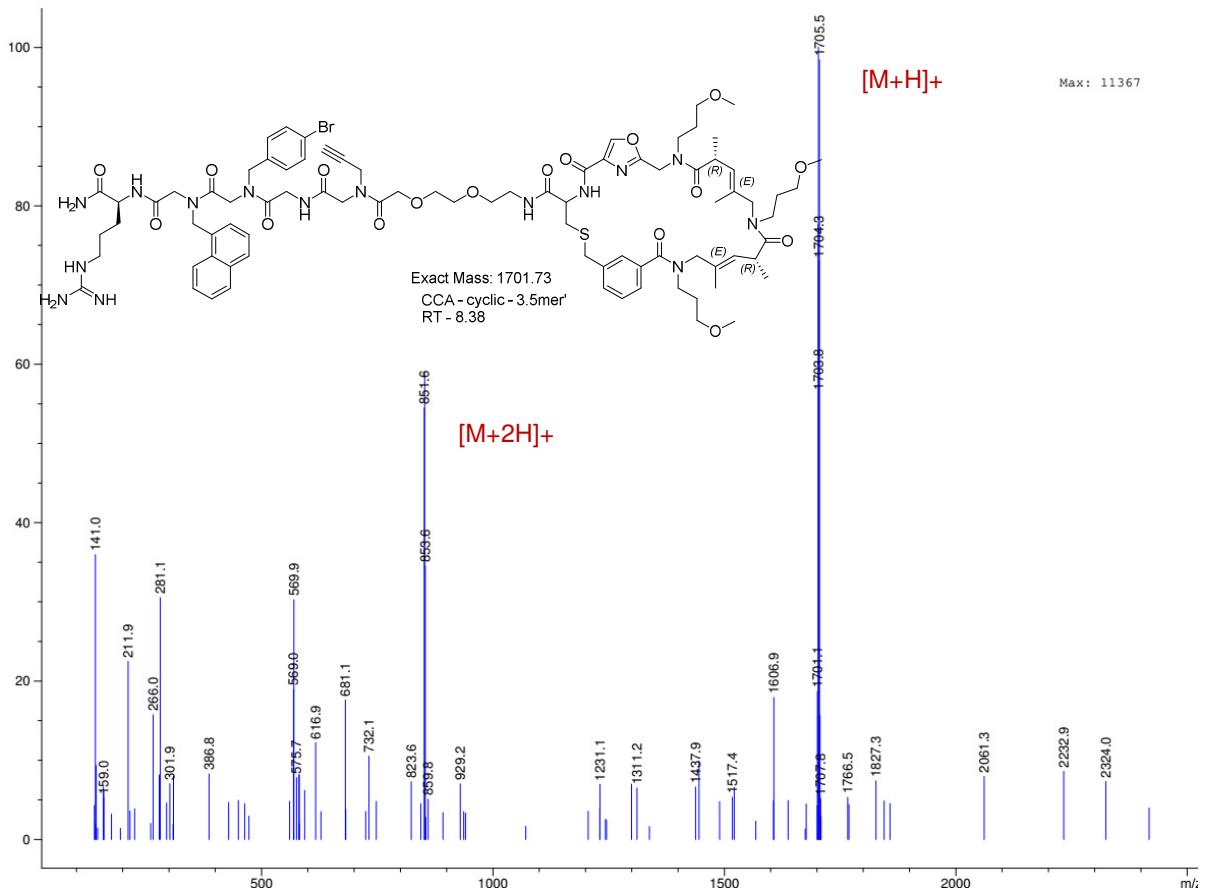

**M4-[CDA]:** Complete cyclization was observed on both 10  $\mu\text{m}$  & 160  $\mu\text{m}$  beads.

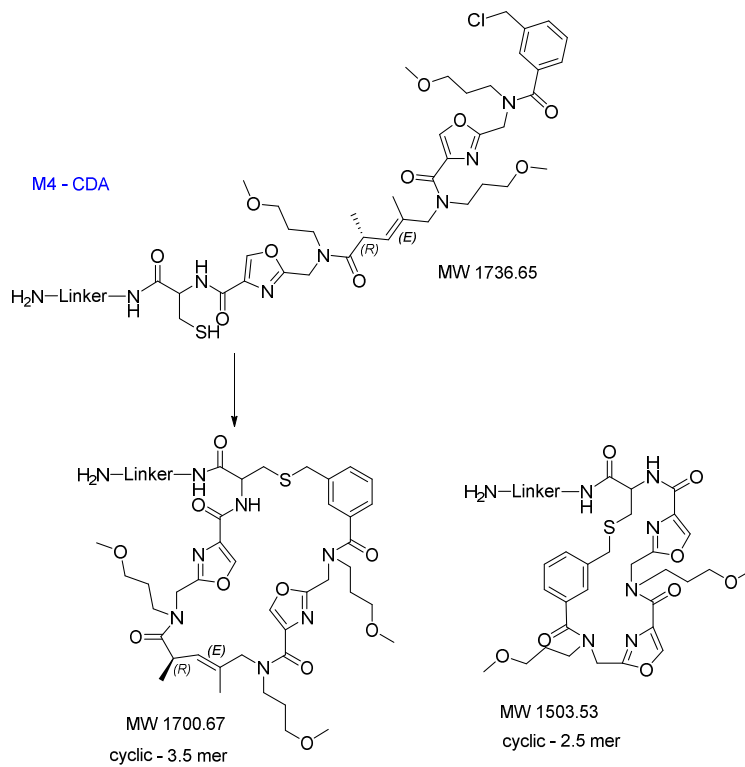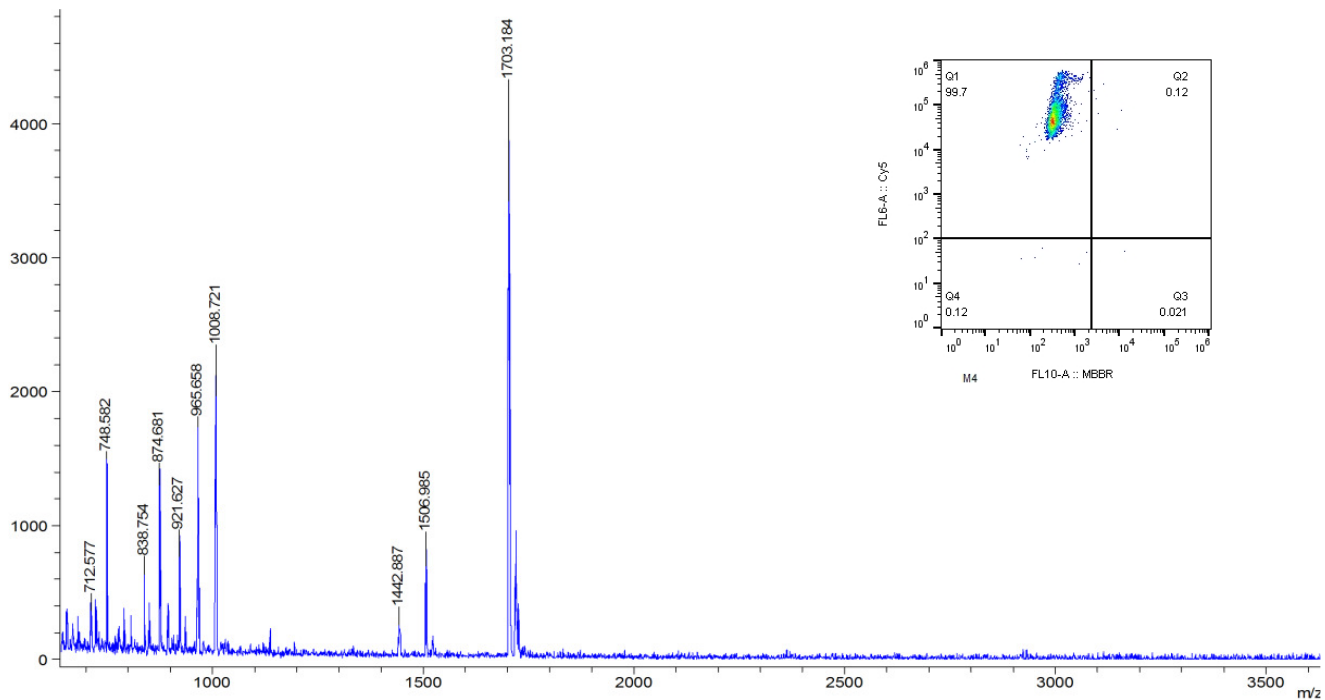

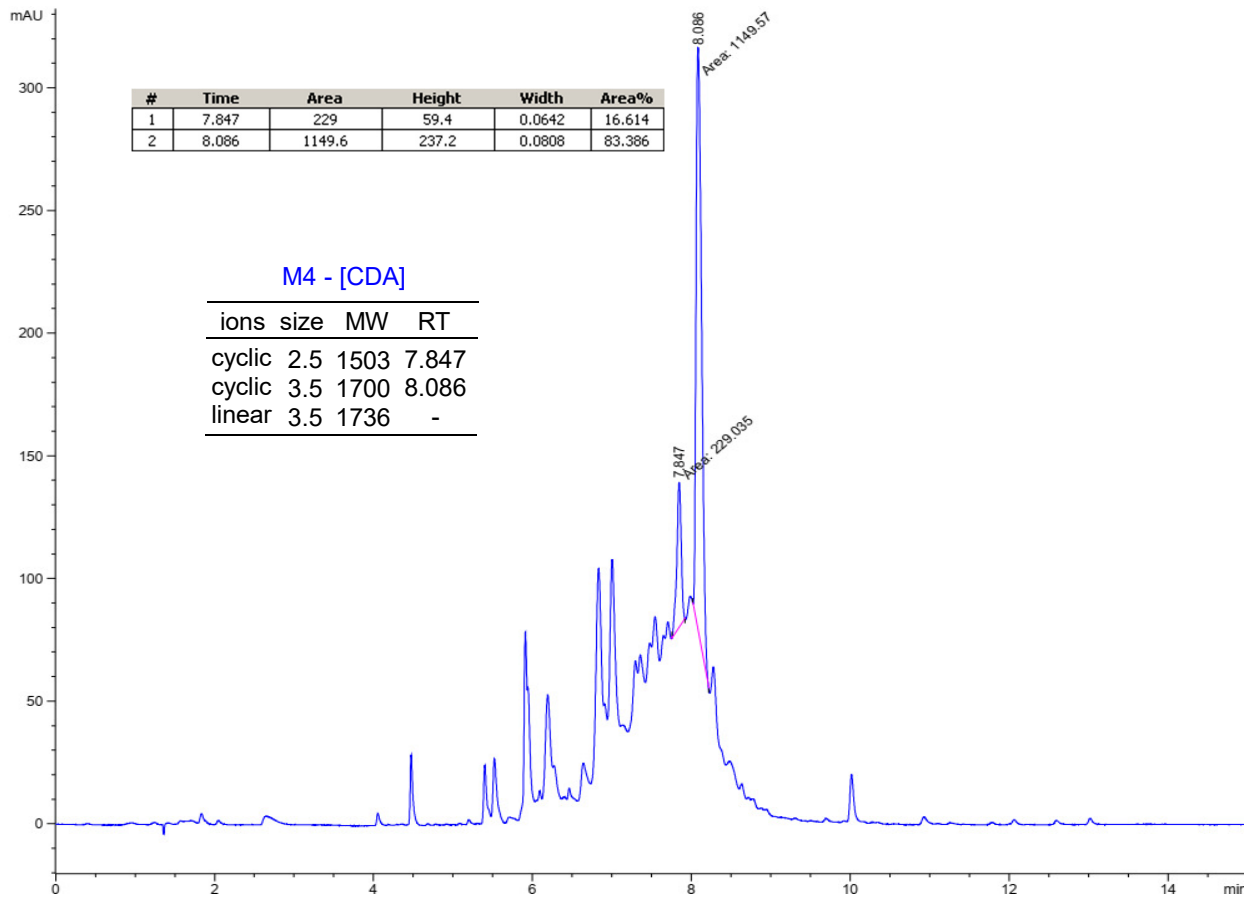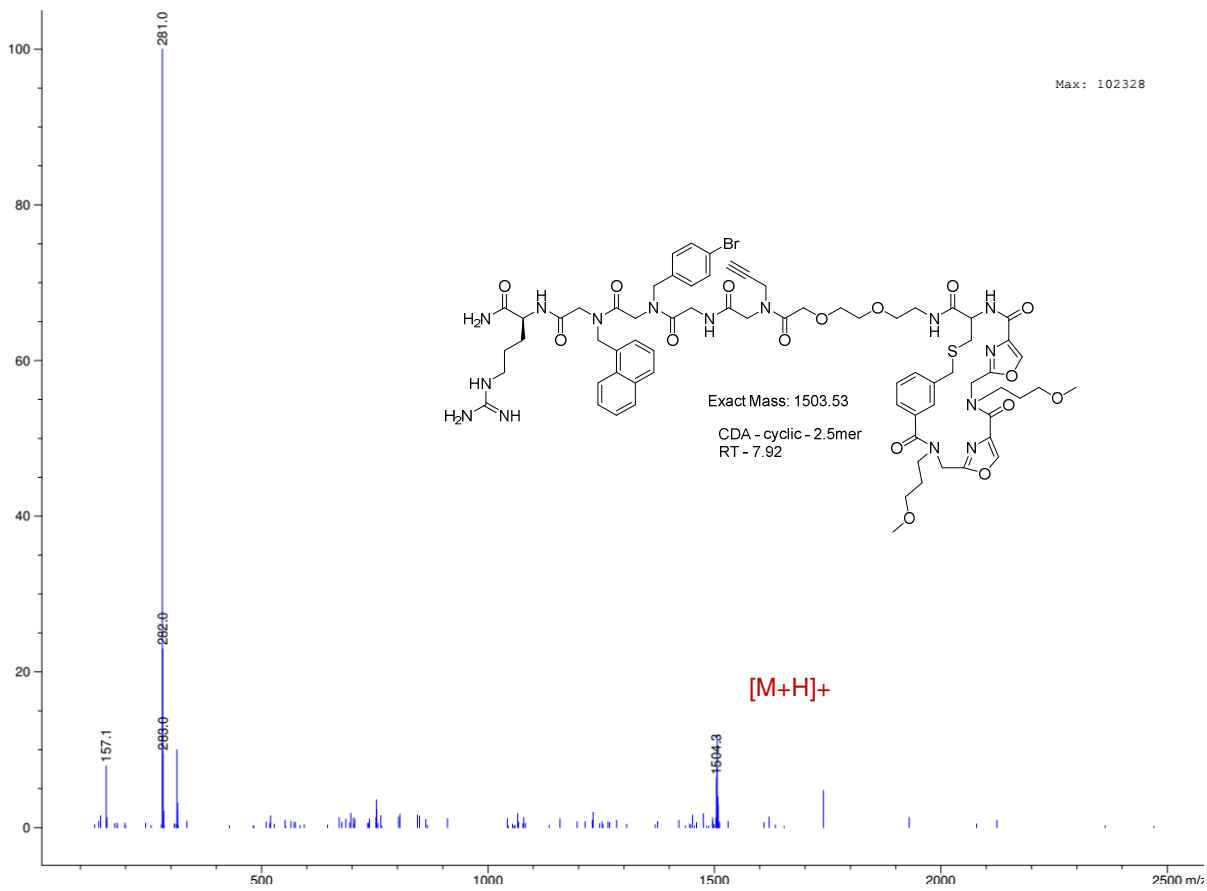

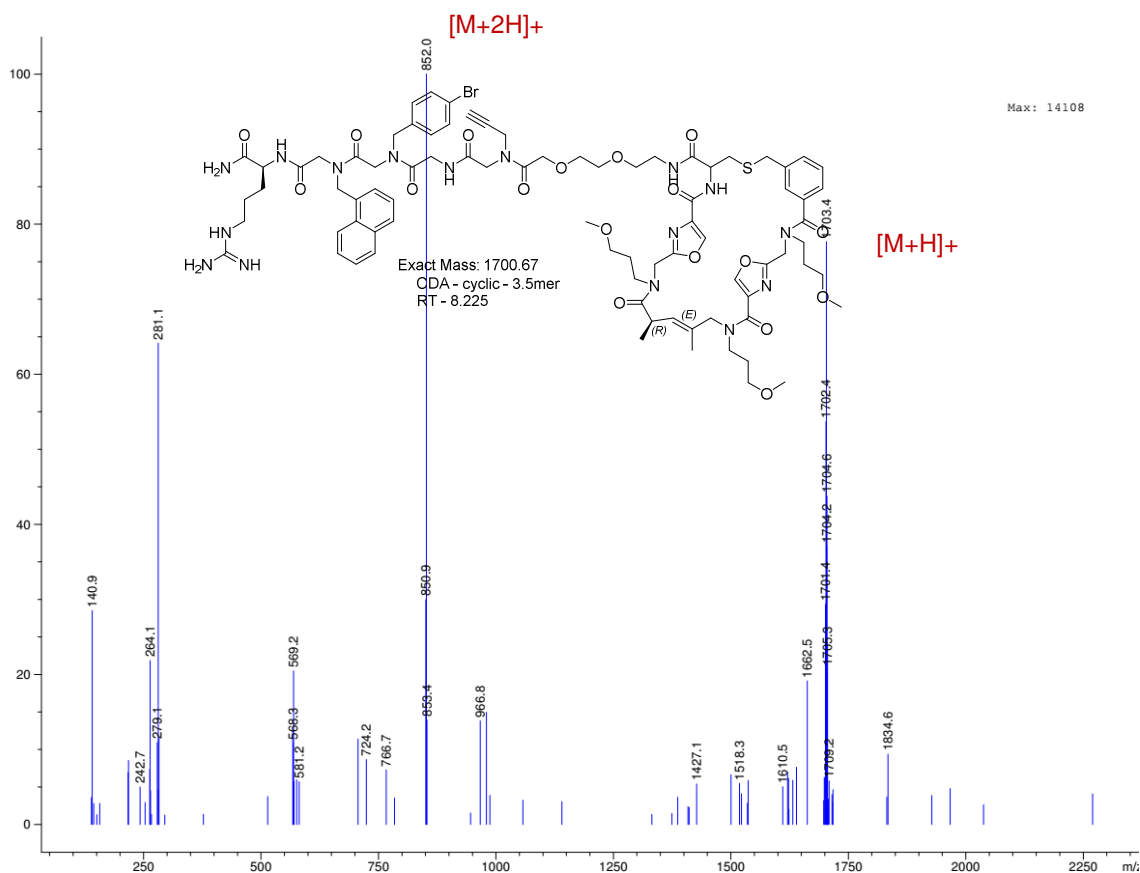

**M7-[CAB]:** Complete cyclization was detected on 10  $\mu\text{m}$  but was incomplete on 160  $\mu\text{m}$  beads.

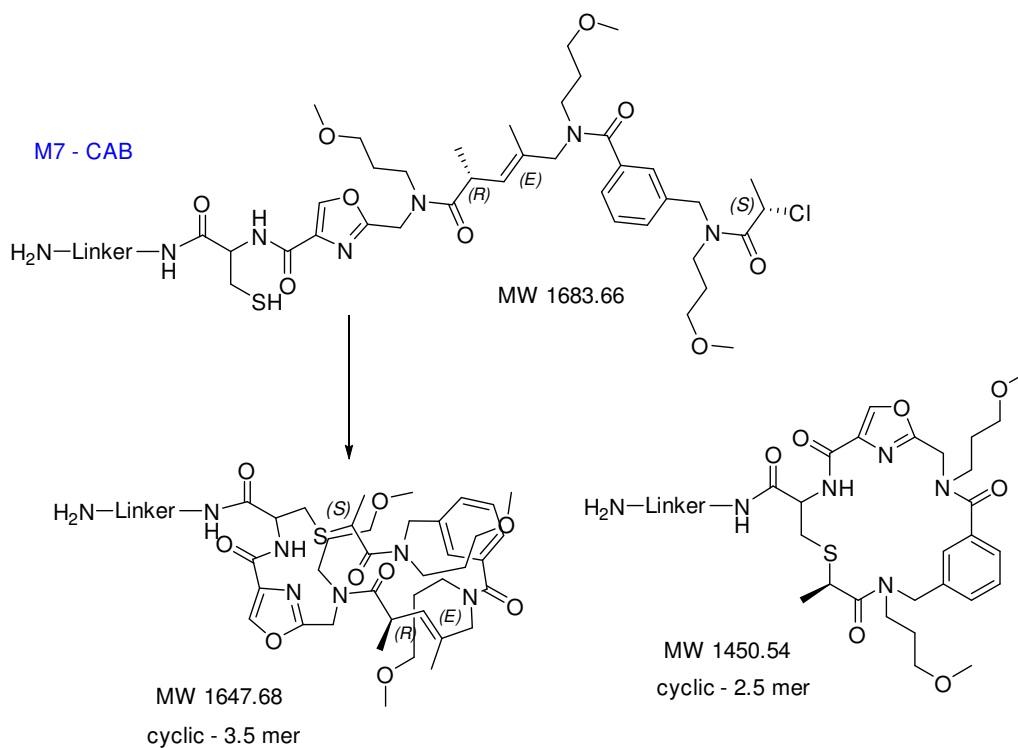

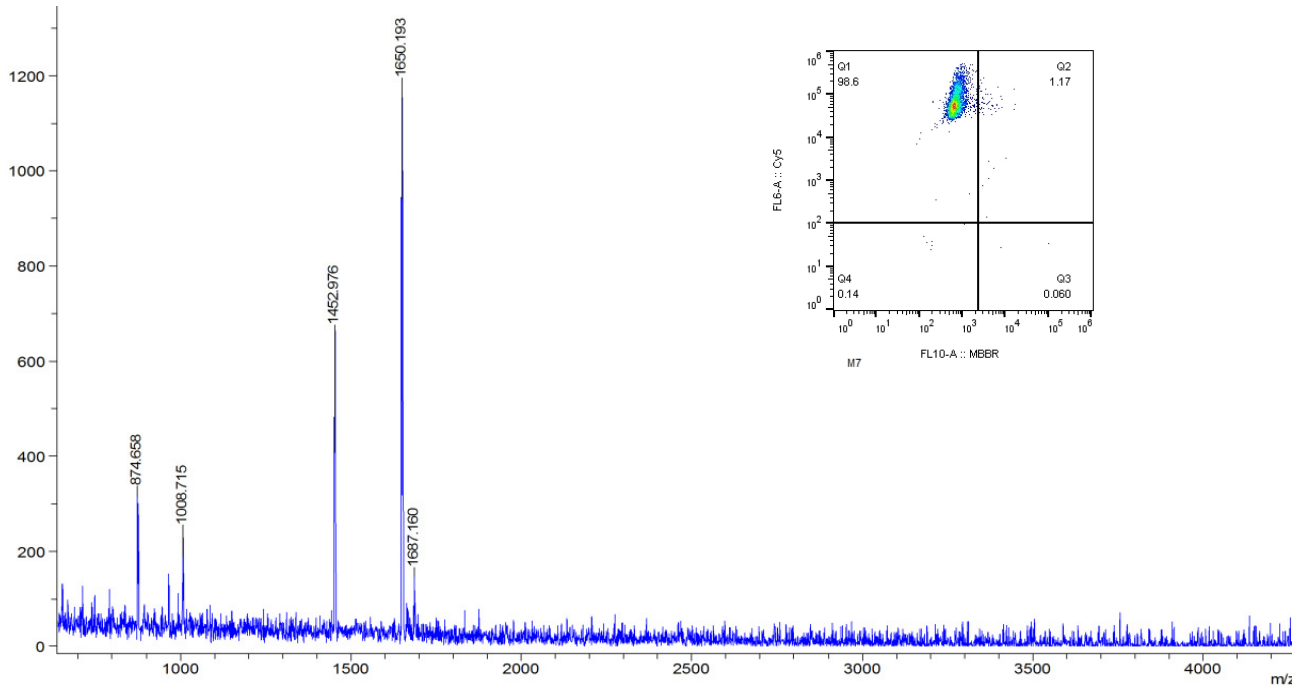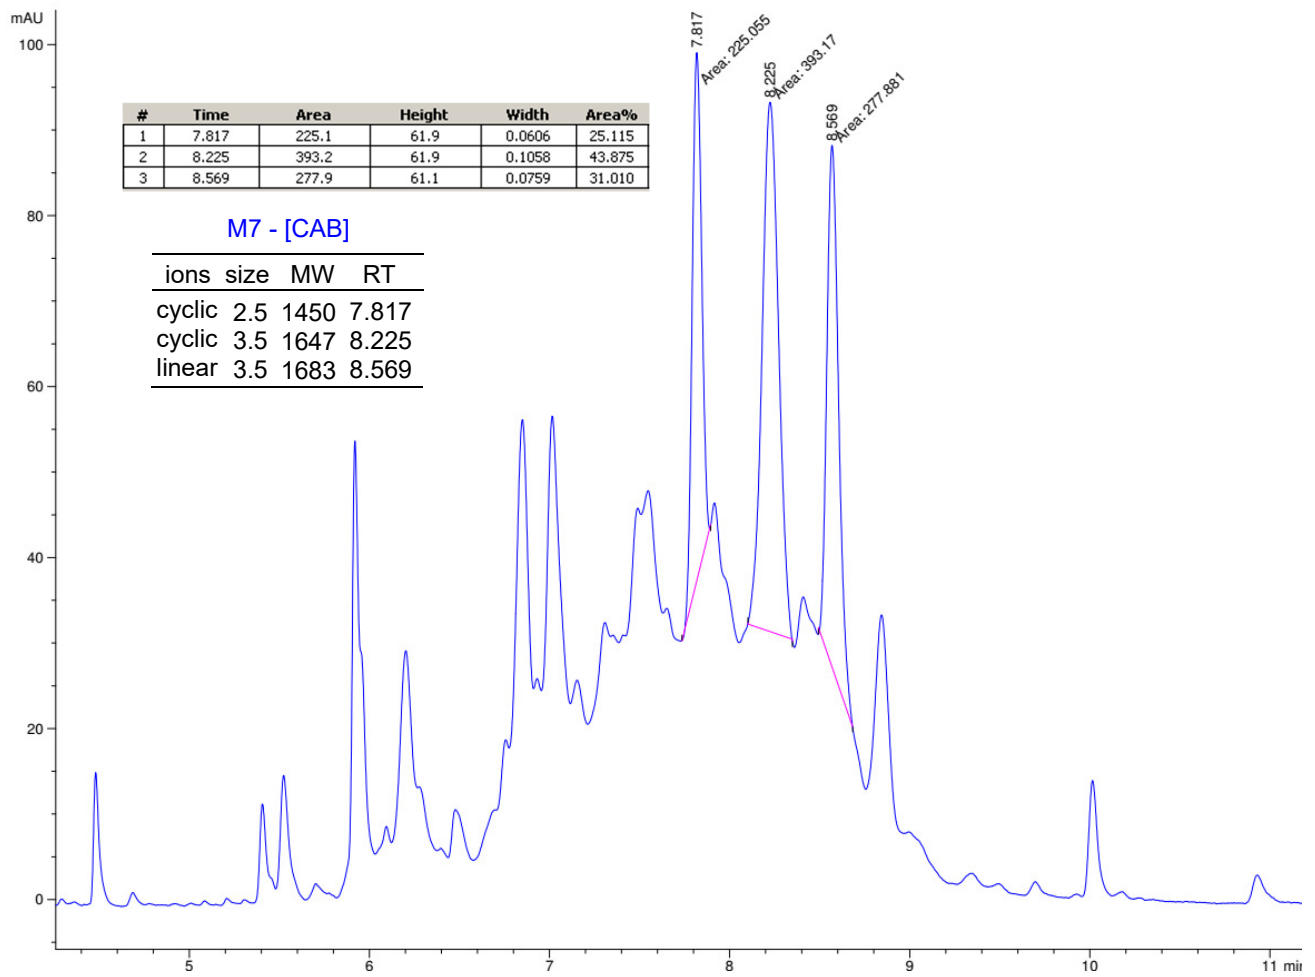

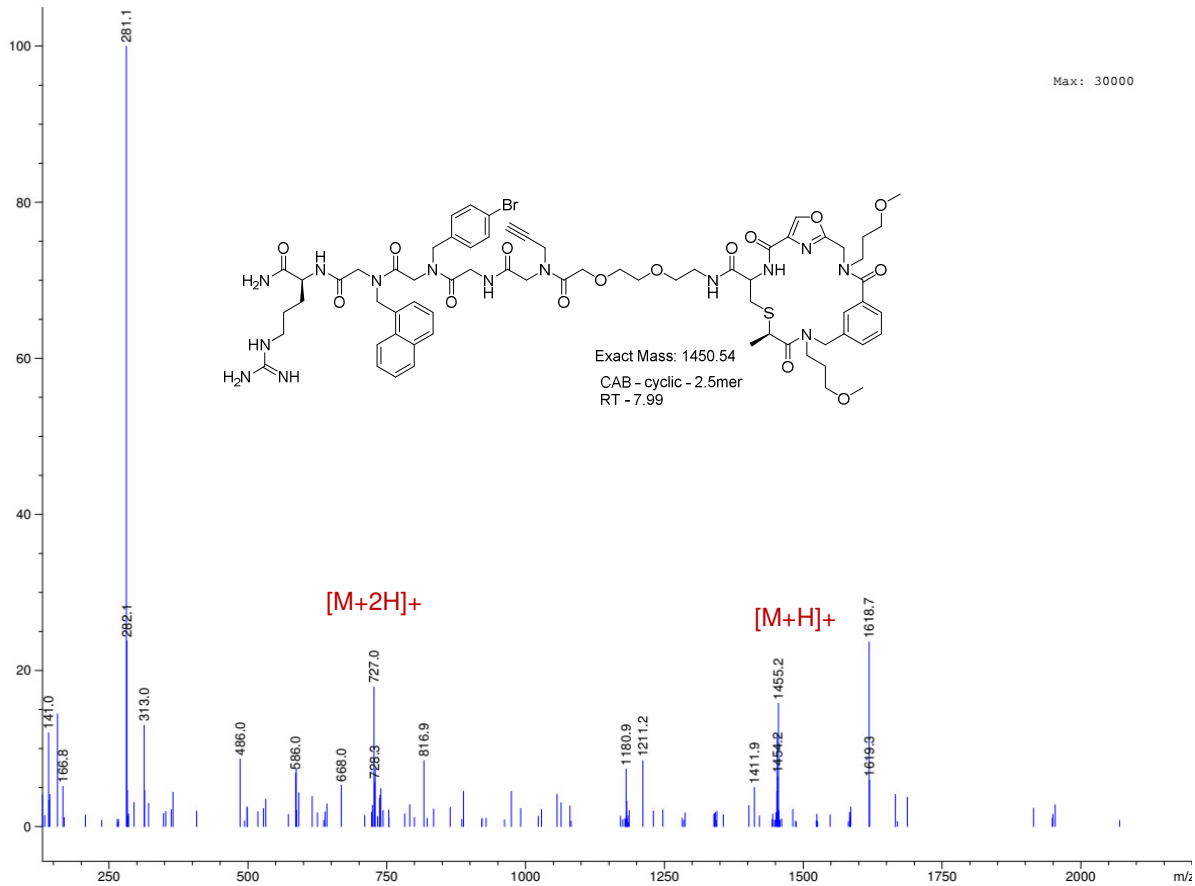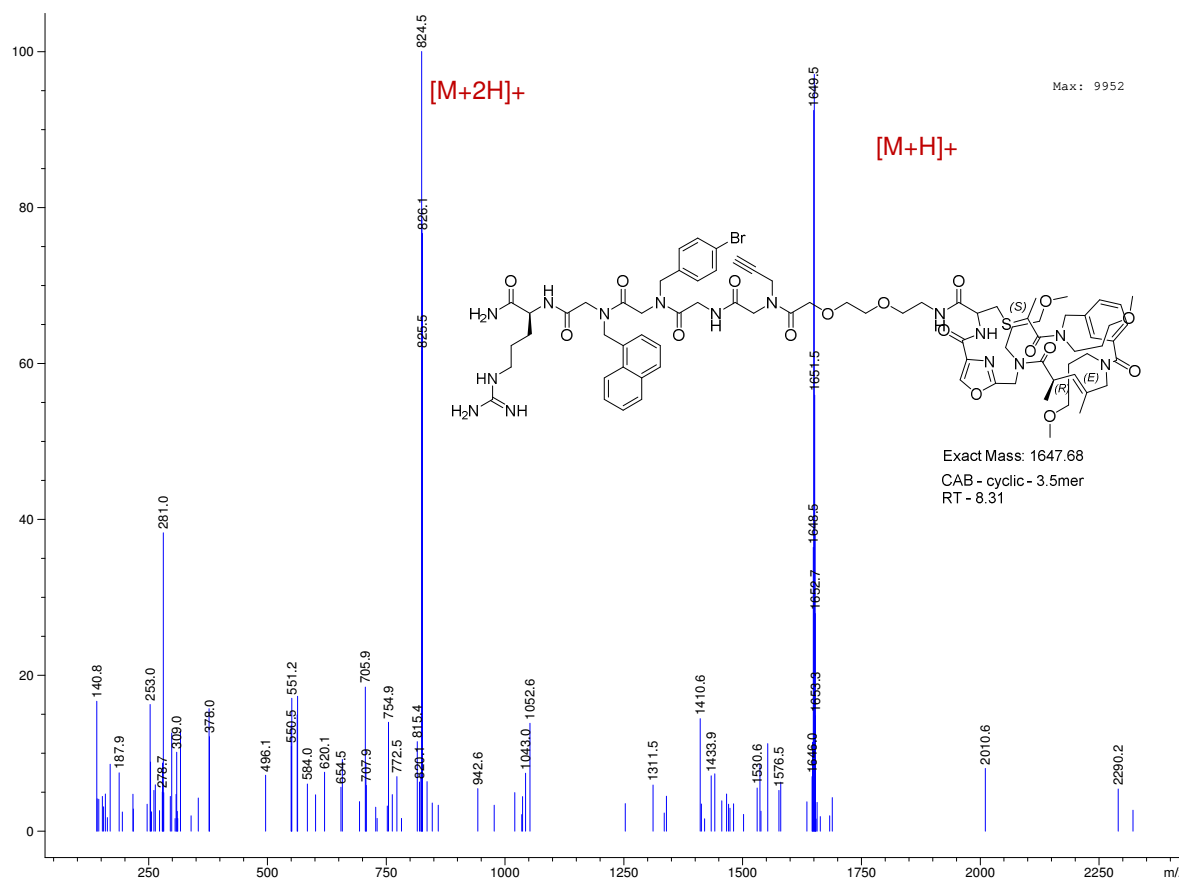

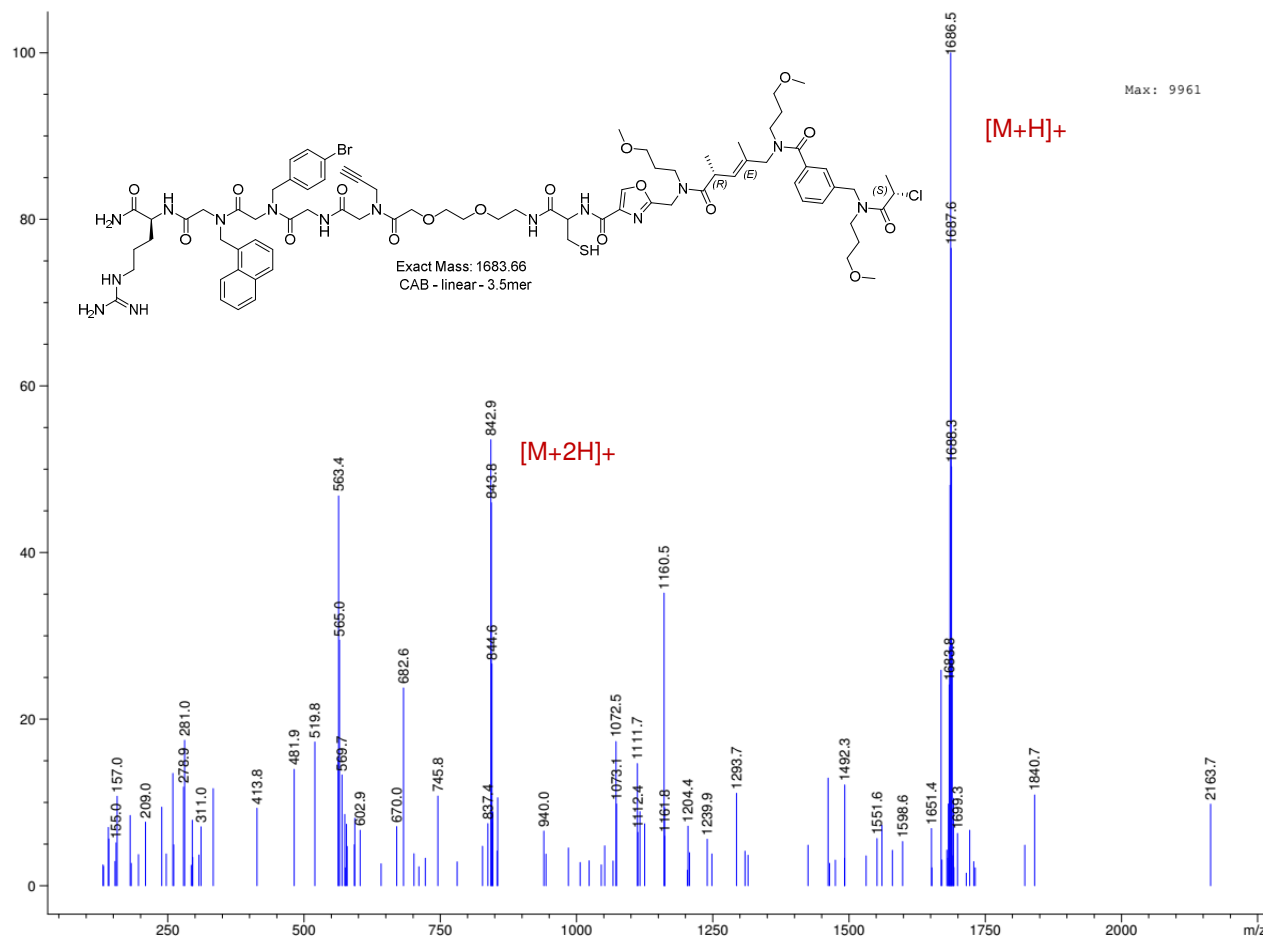

**M8-[CBB]:** Complete cyclization was observed on 10  $\mu\text{m}$  but 160  $\mu\text{m}$  had incomplete cyclization.

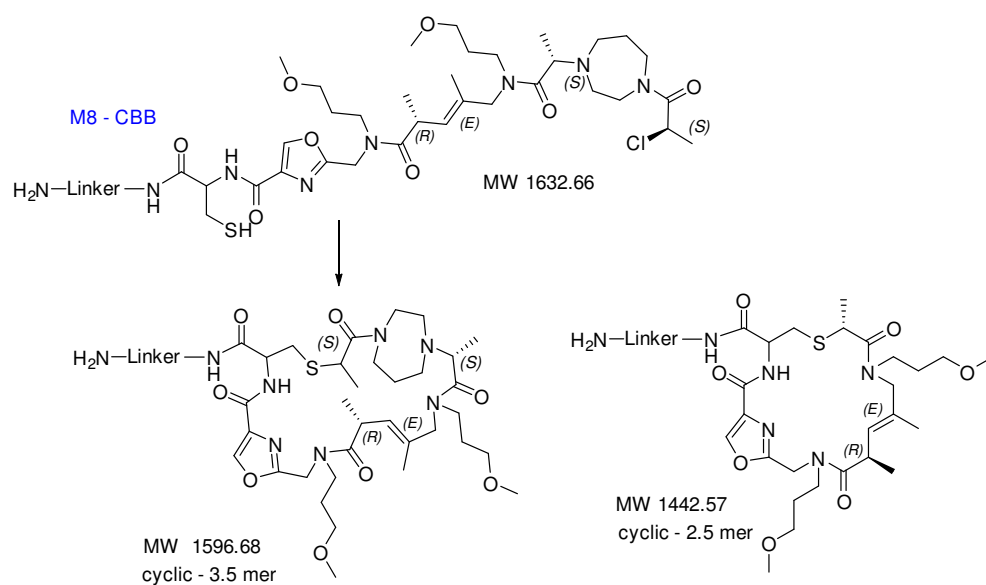



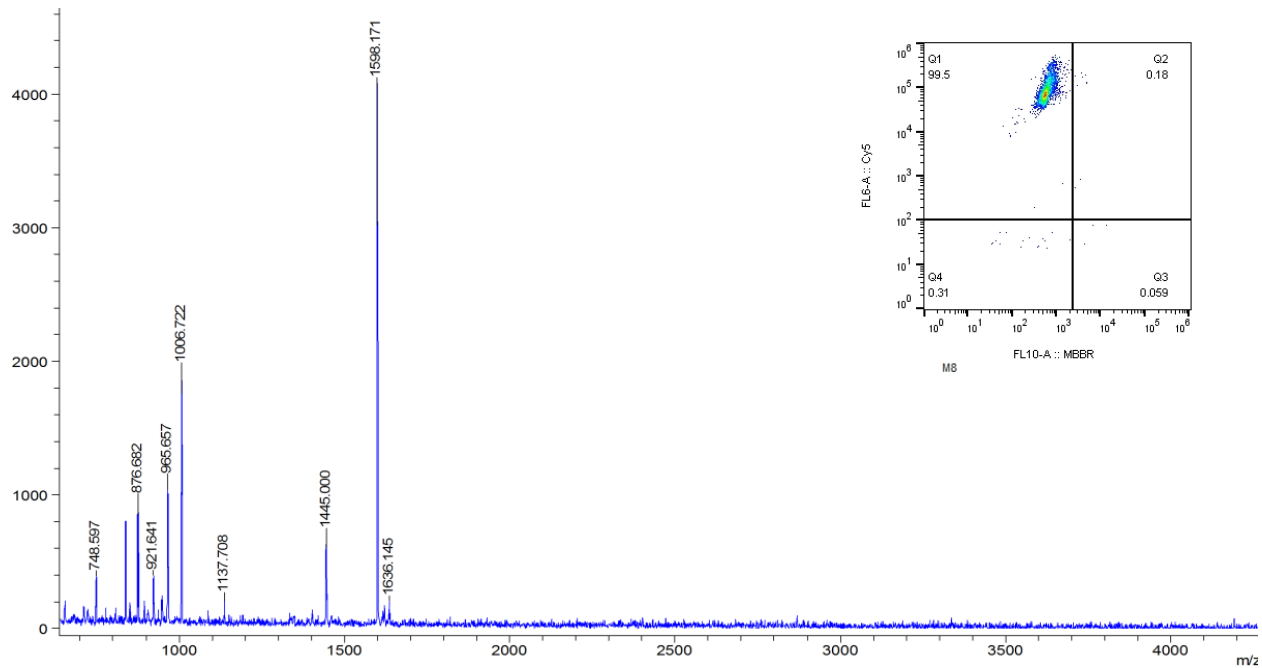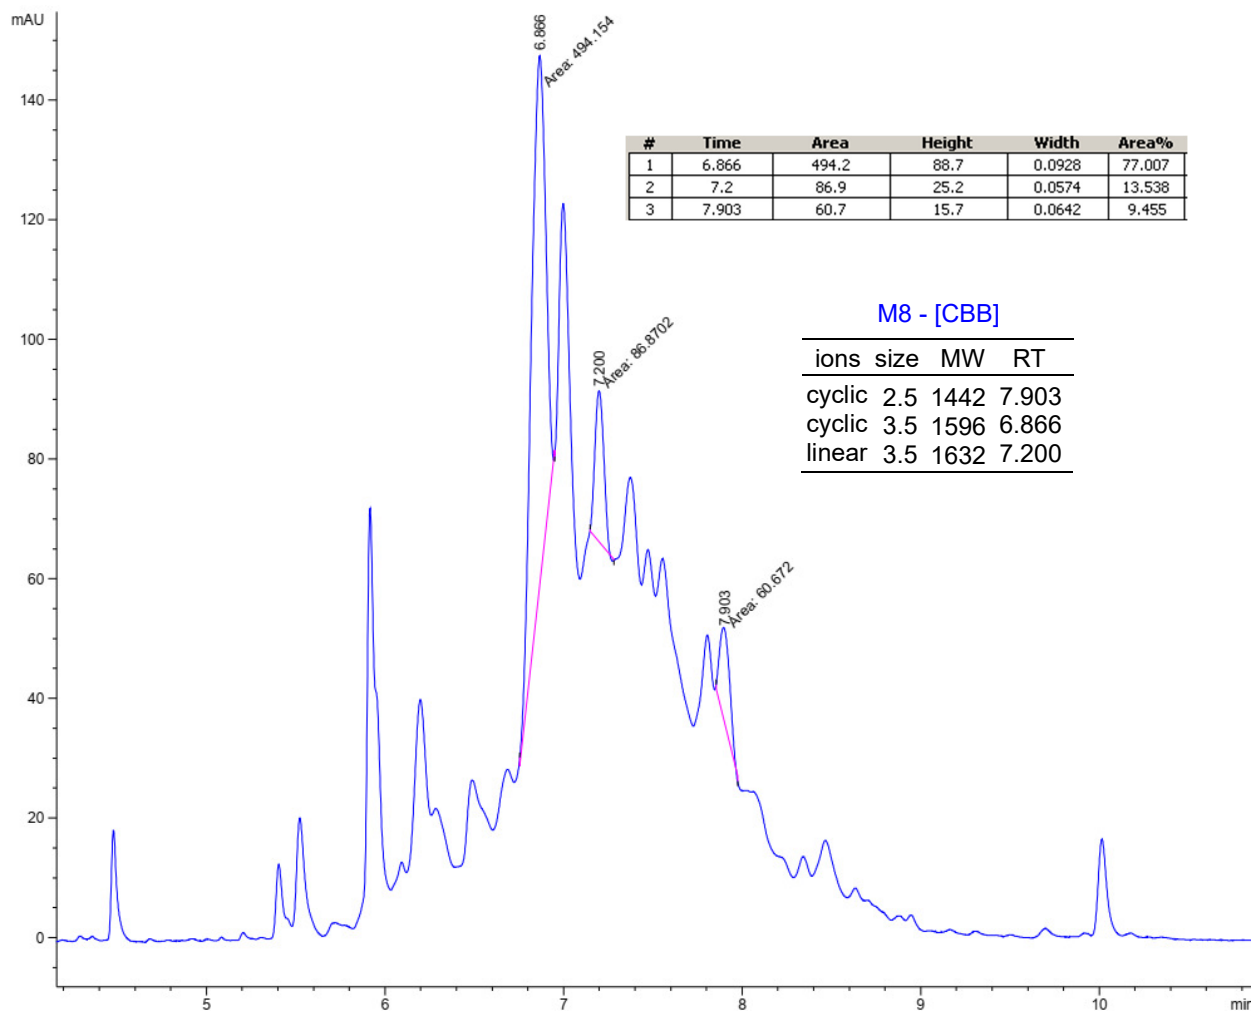

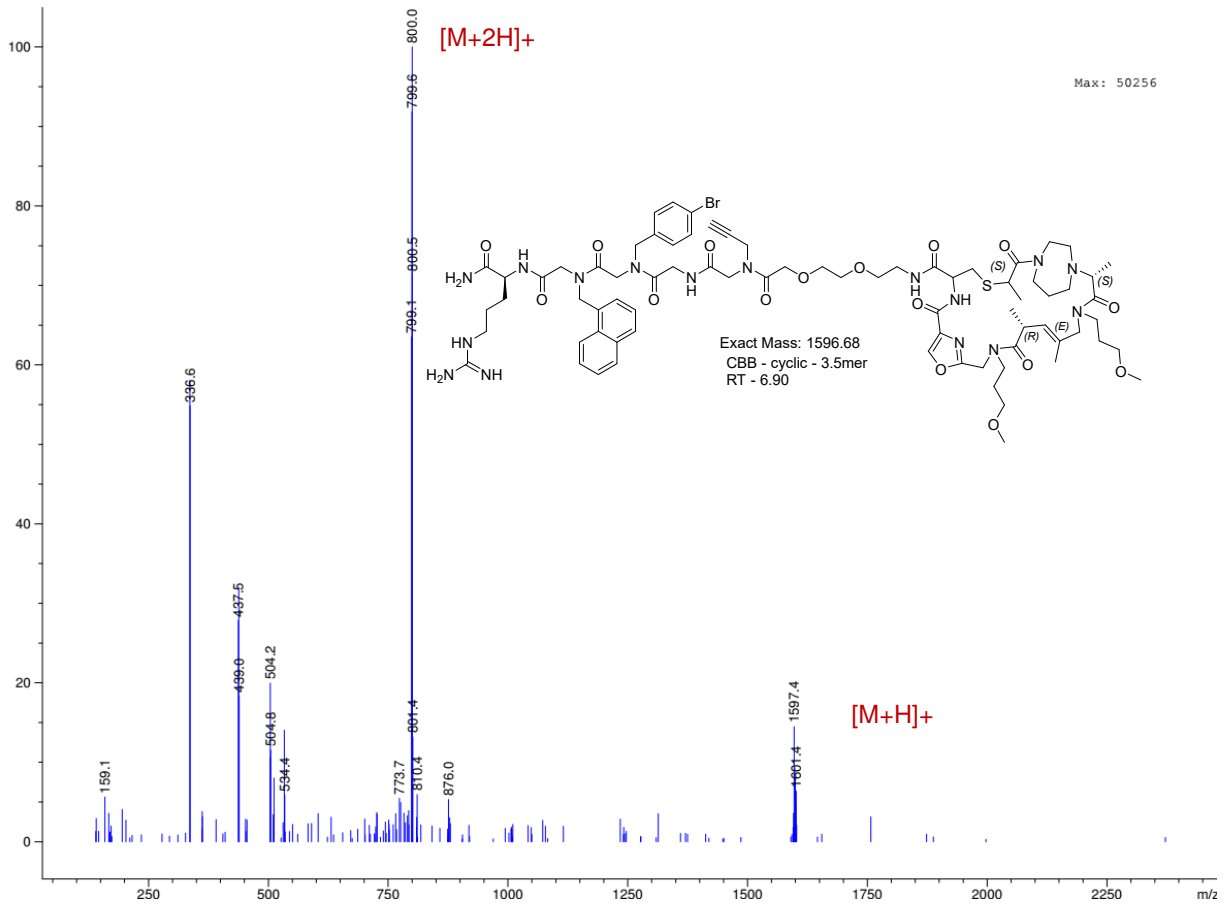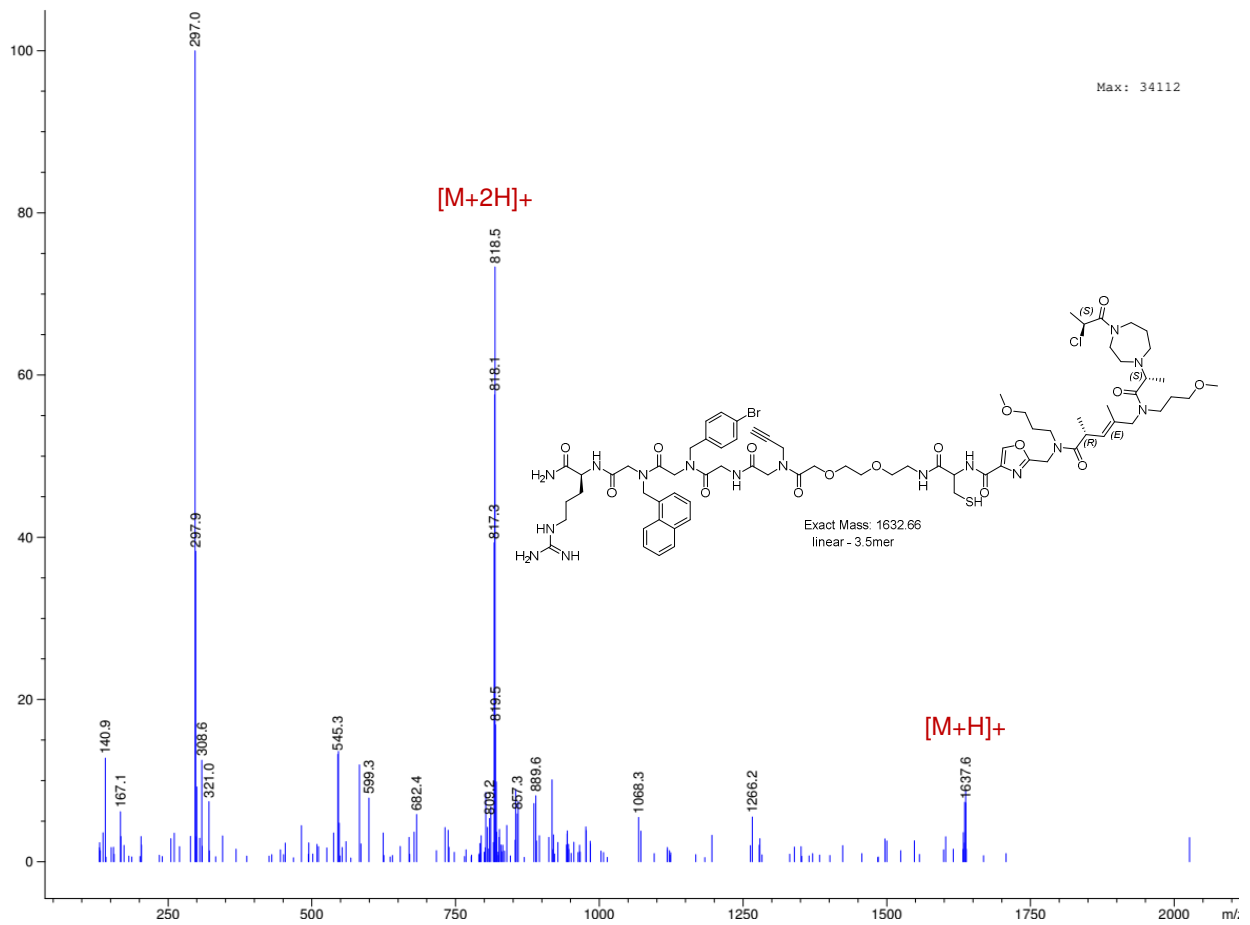

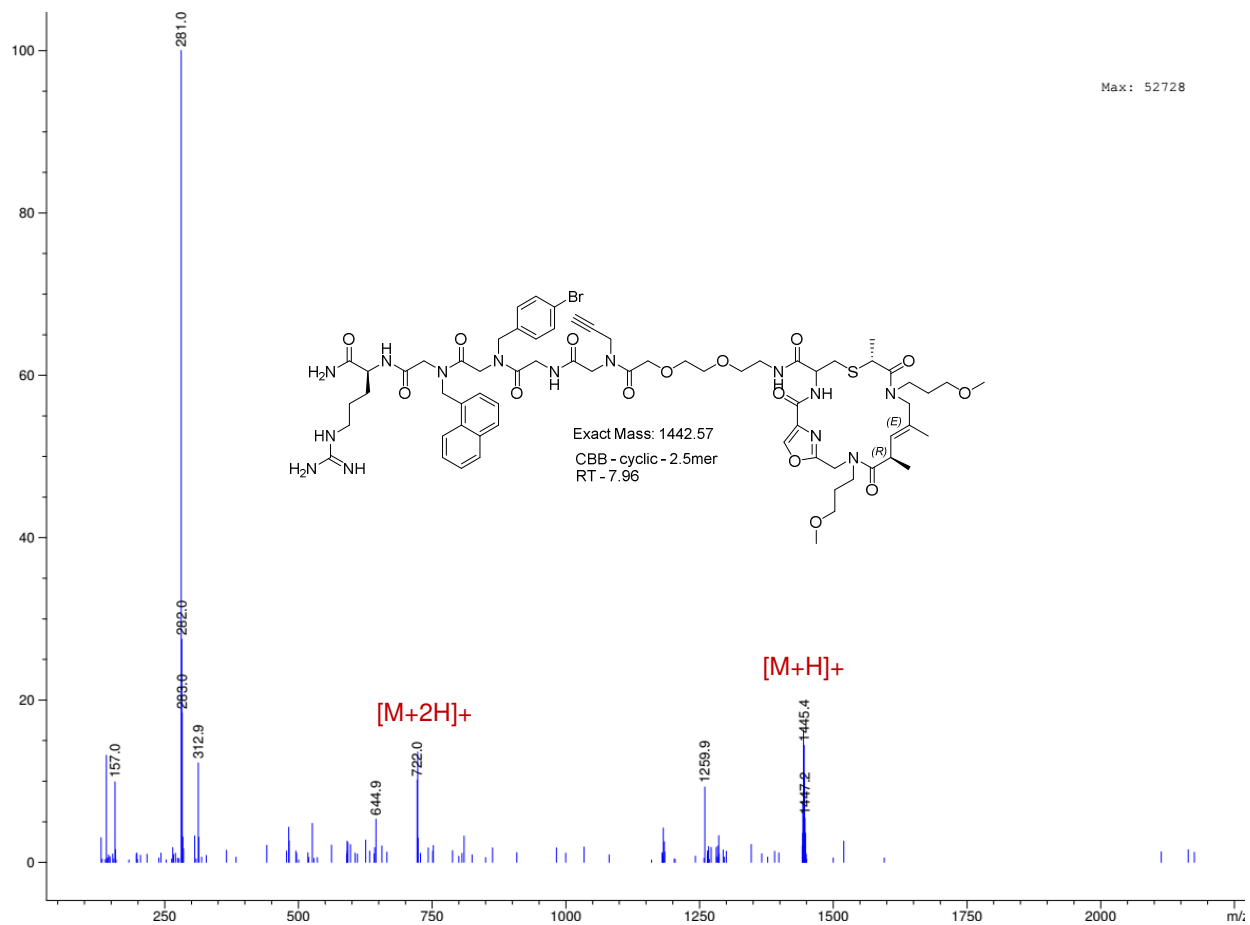

**M9-[CCB]:** Incomplete cyclization was observed on both 10  $\mu\text{m}$  and 160  $\mu\text{m}$  beads.

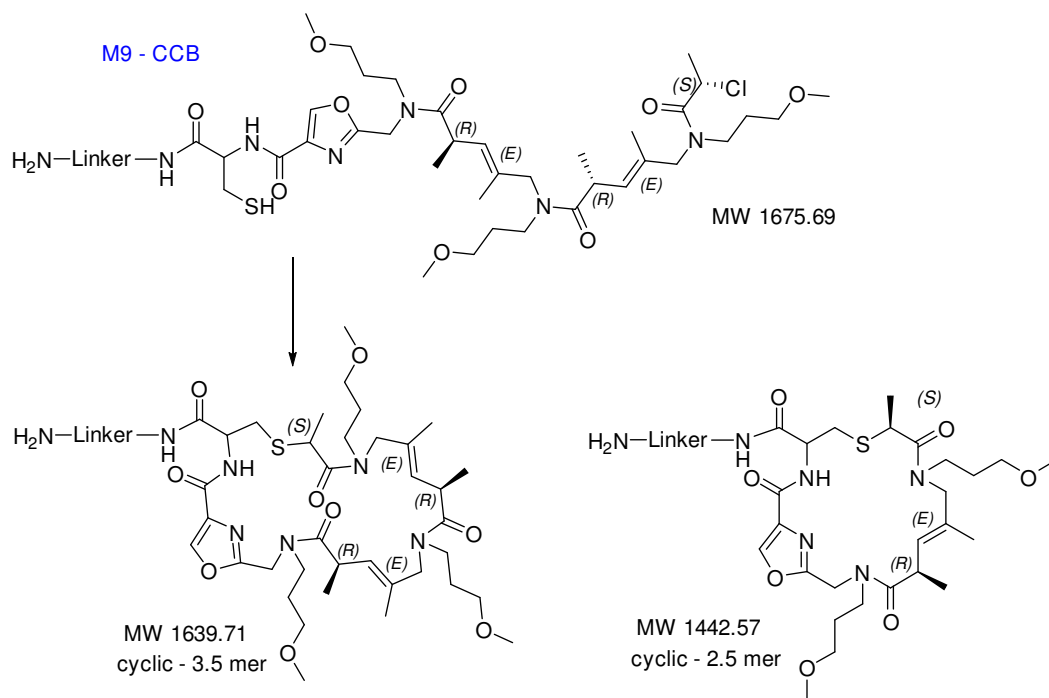

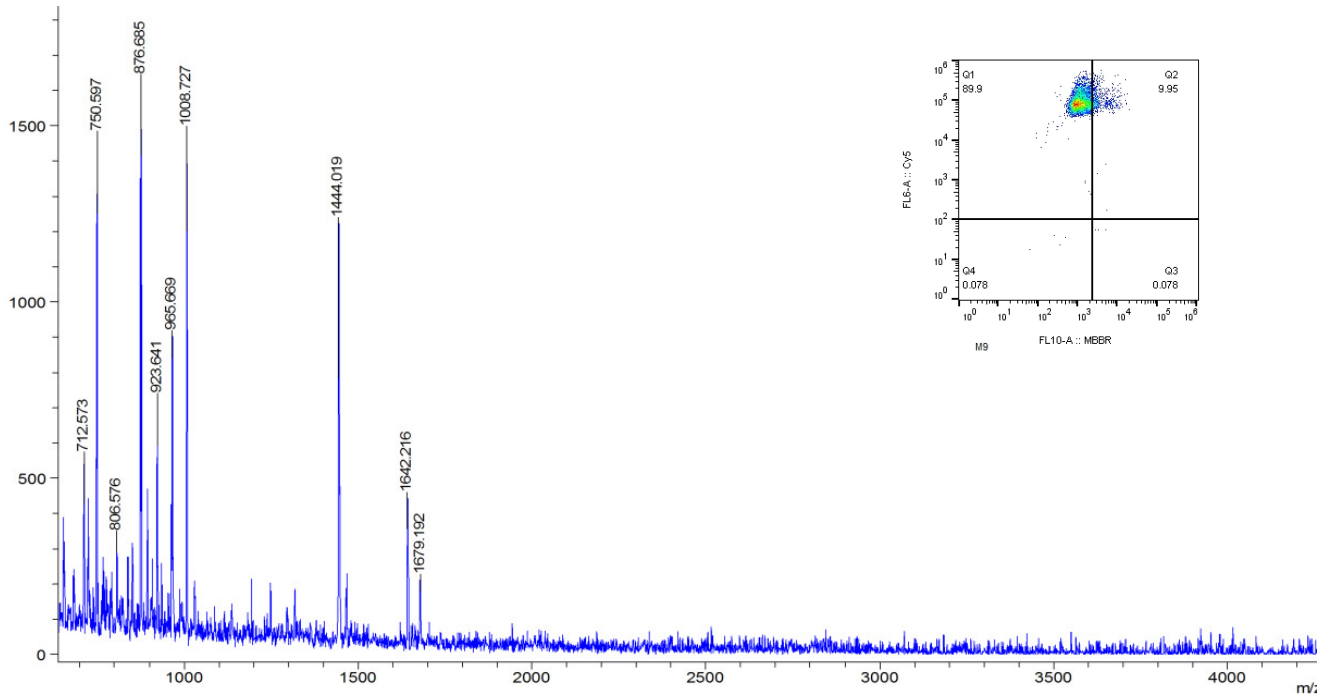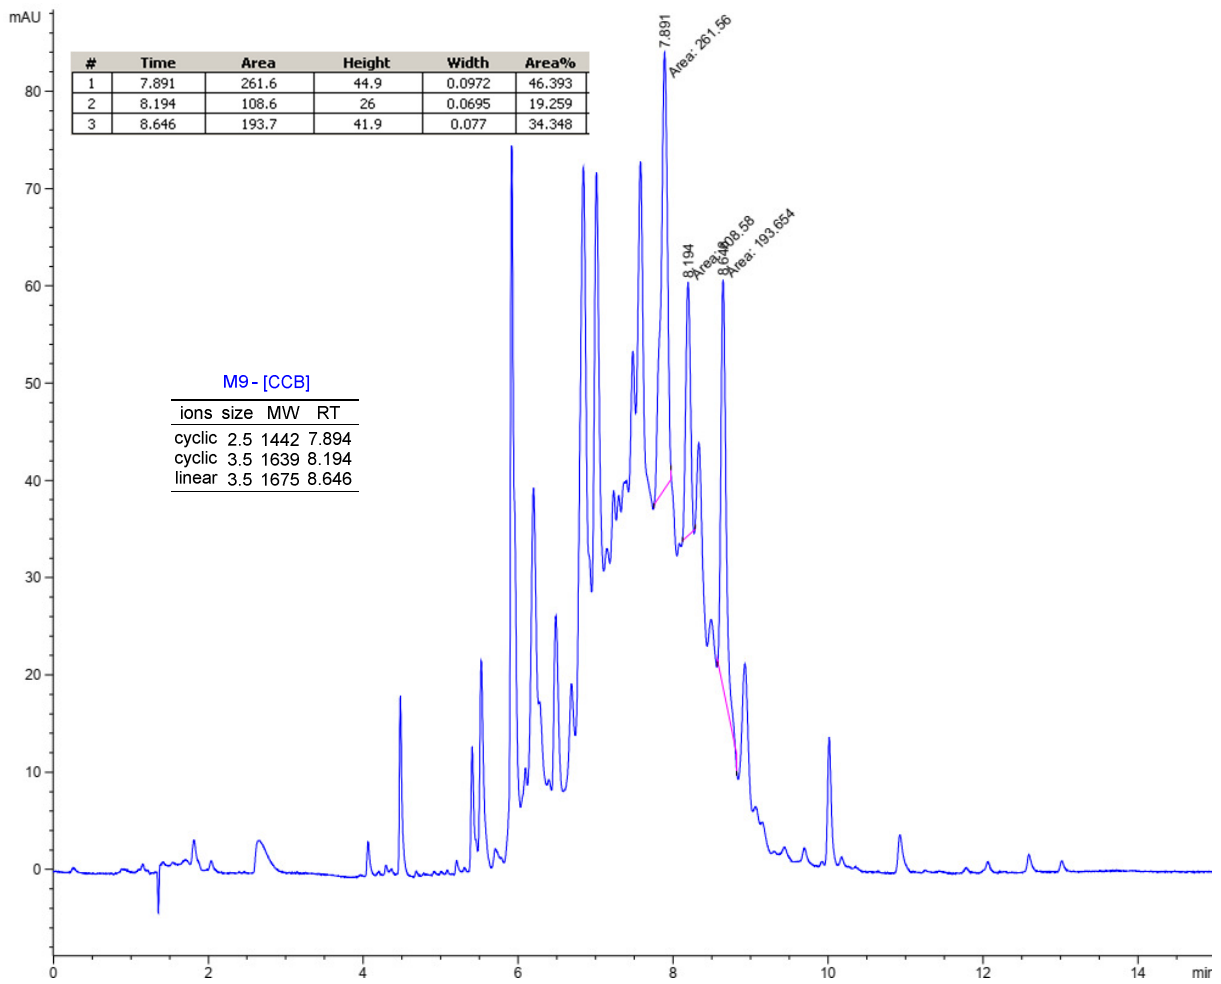

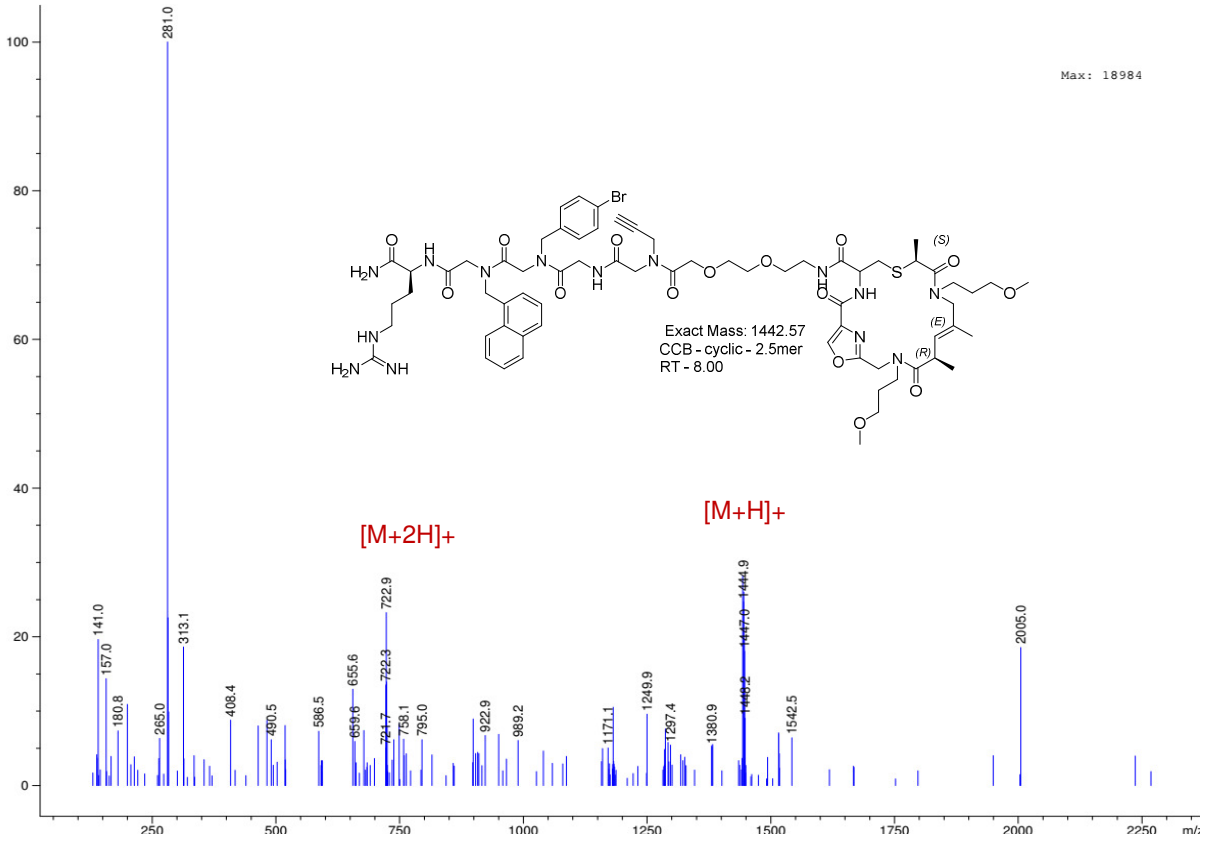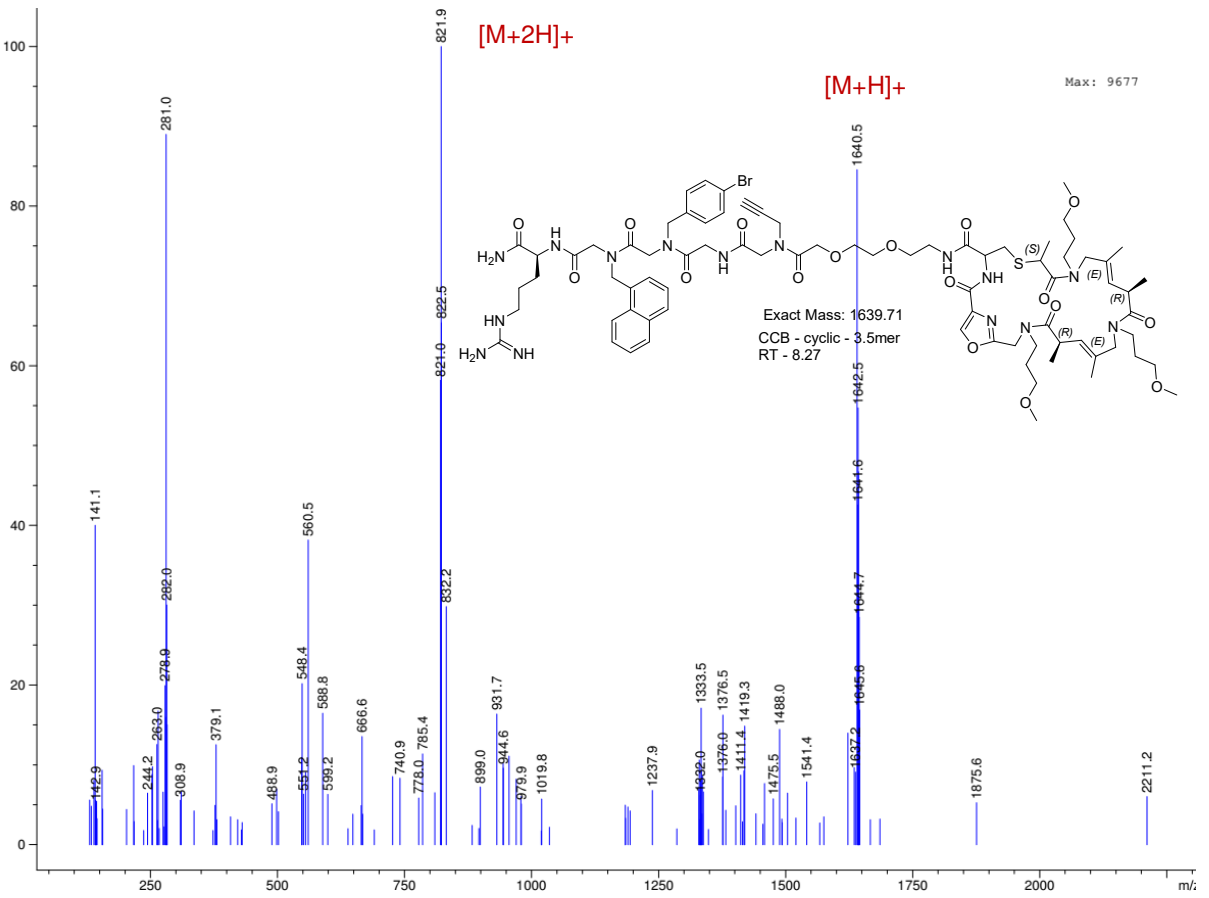

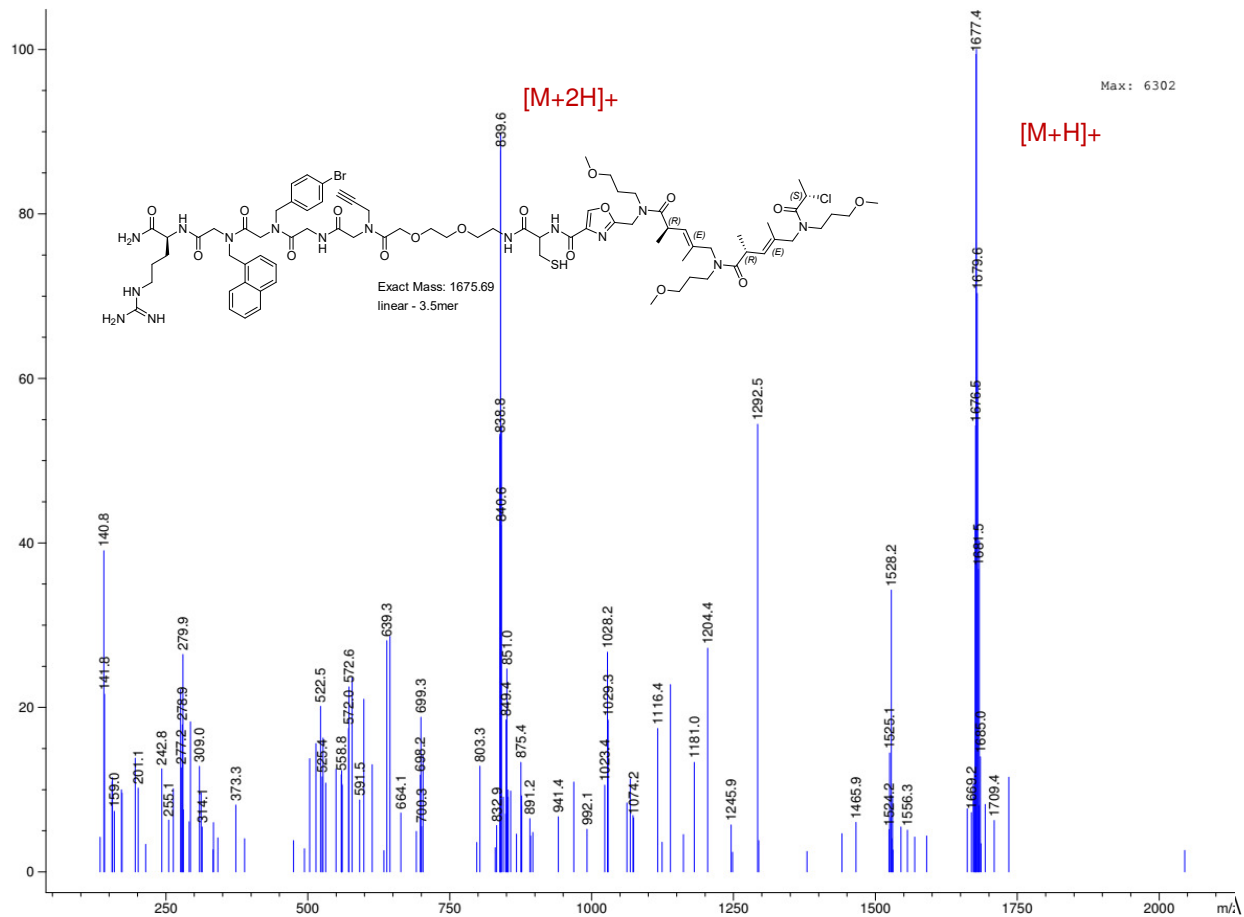

**M10-[CDB]:** Complete cyclization was observed on 10  $\mu\text{m}$  but 160  $\mu\text{m}$  beads had incomplete cyclization. Linear precursor was detected (MW 1674, RT- 8.40).

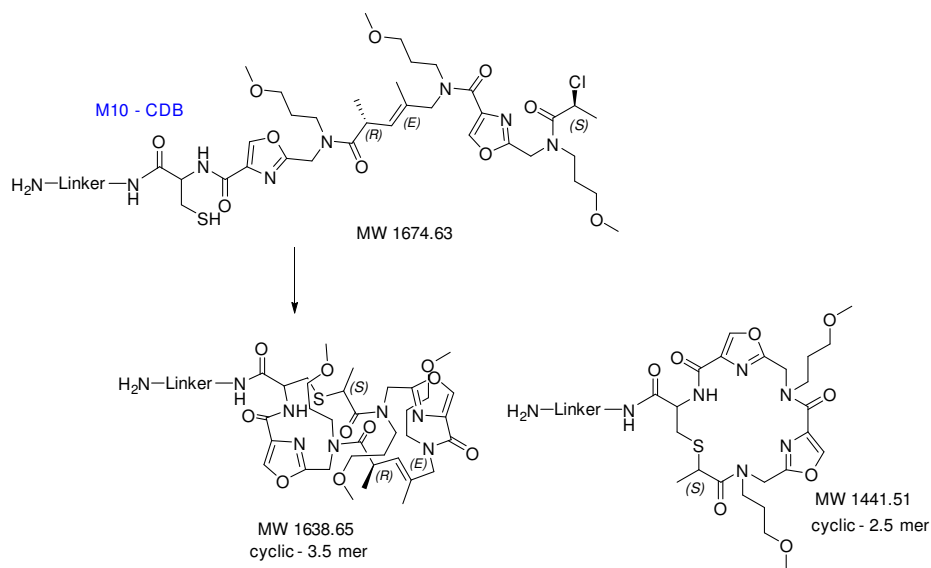

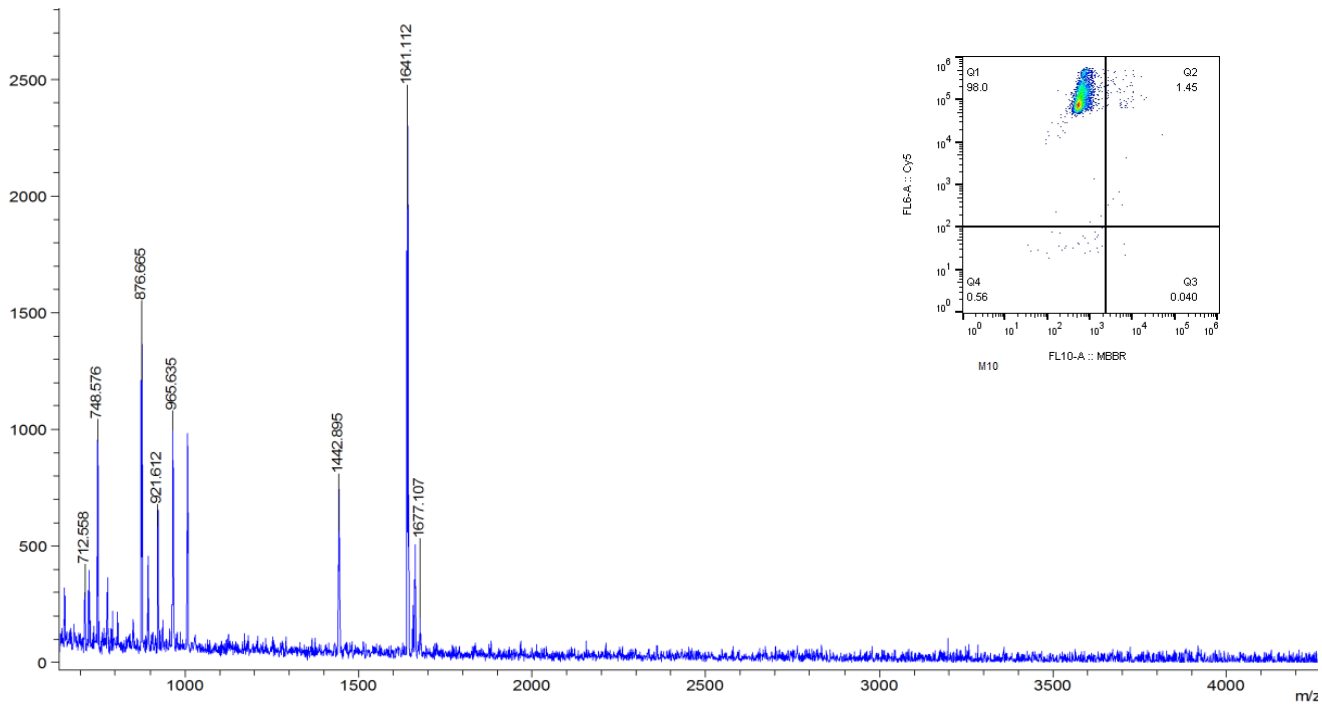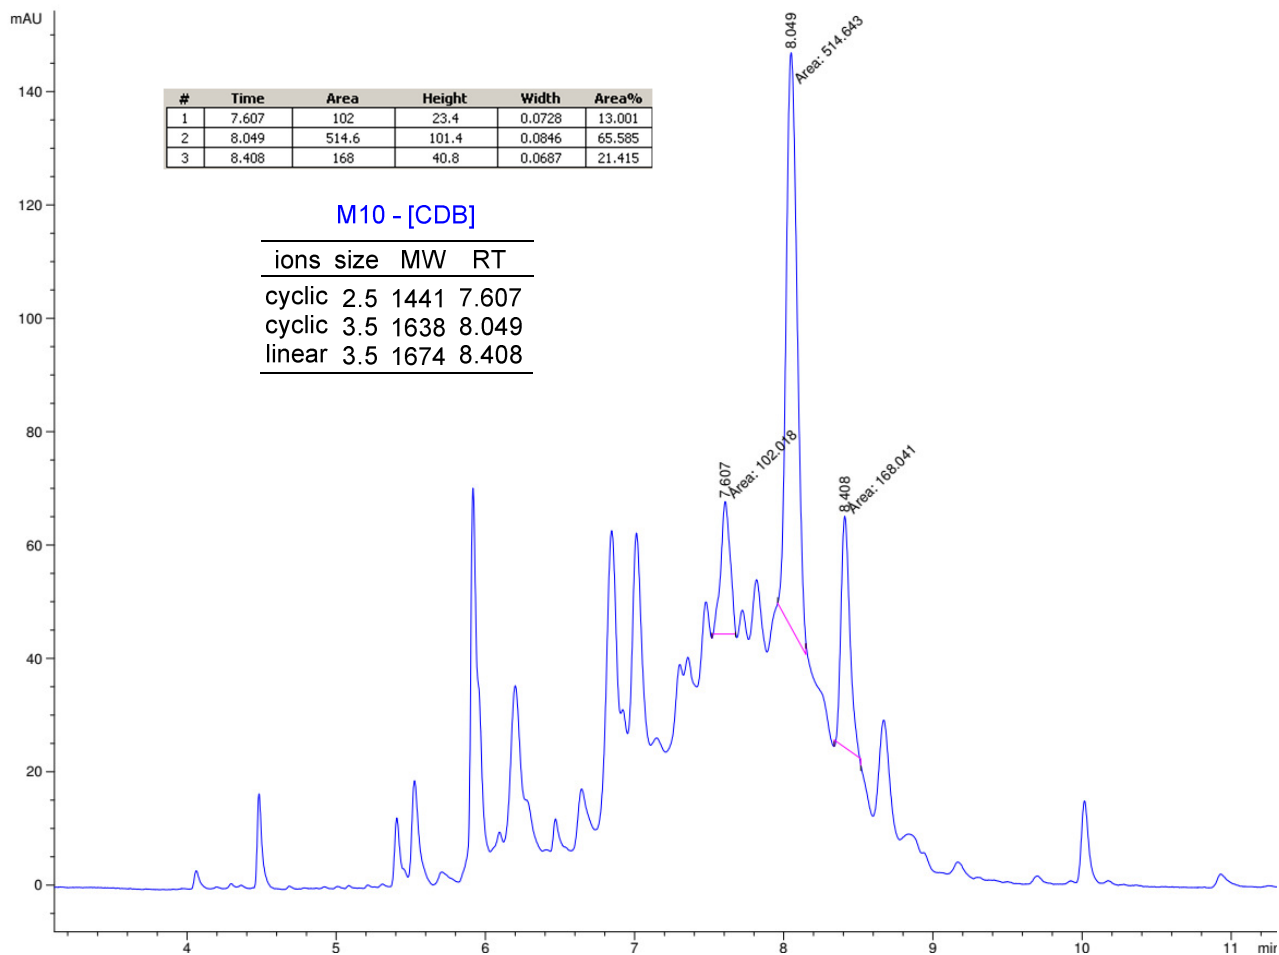

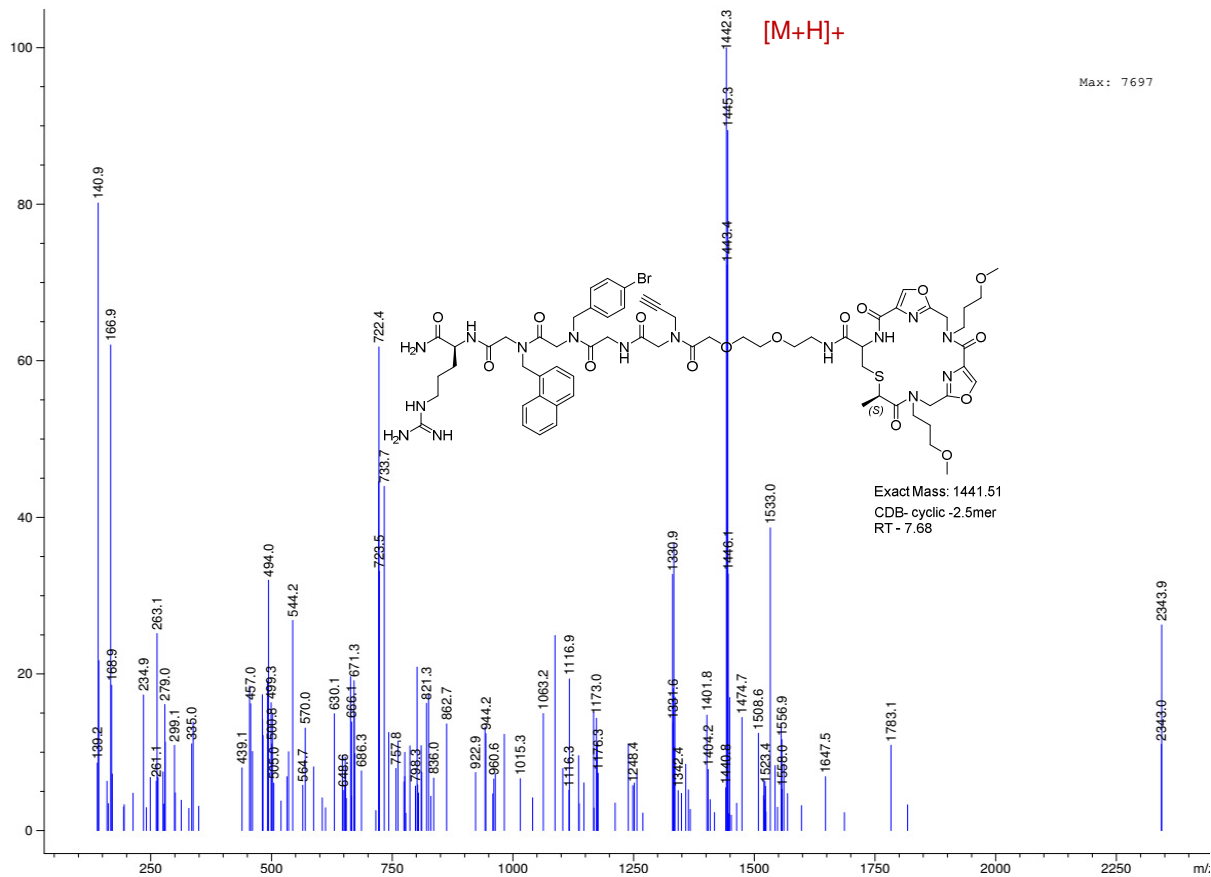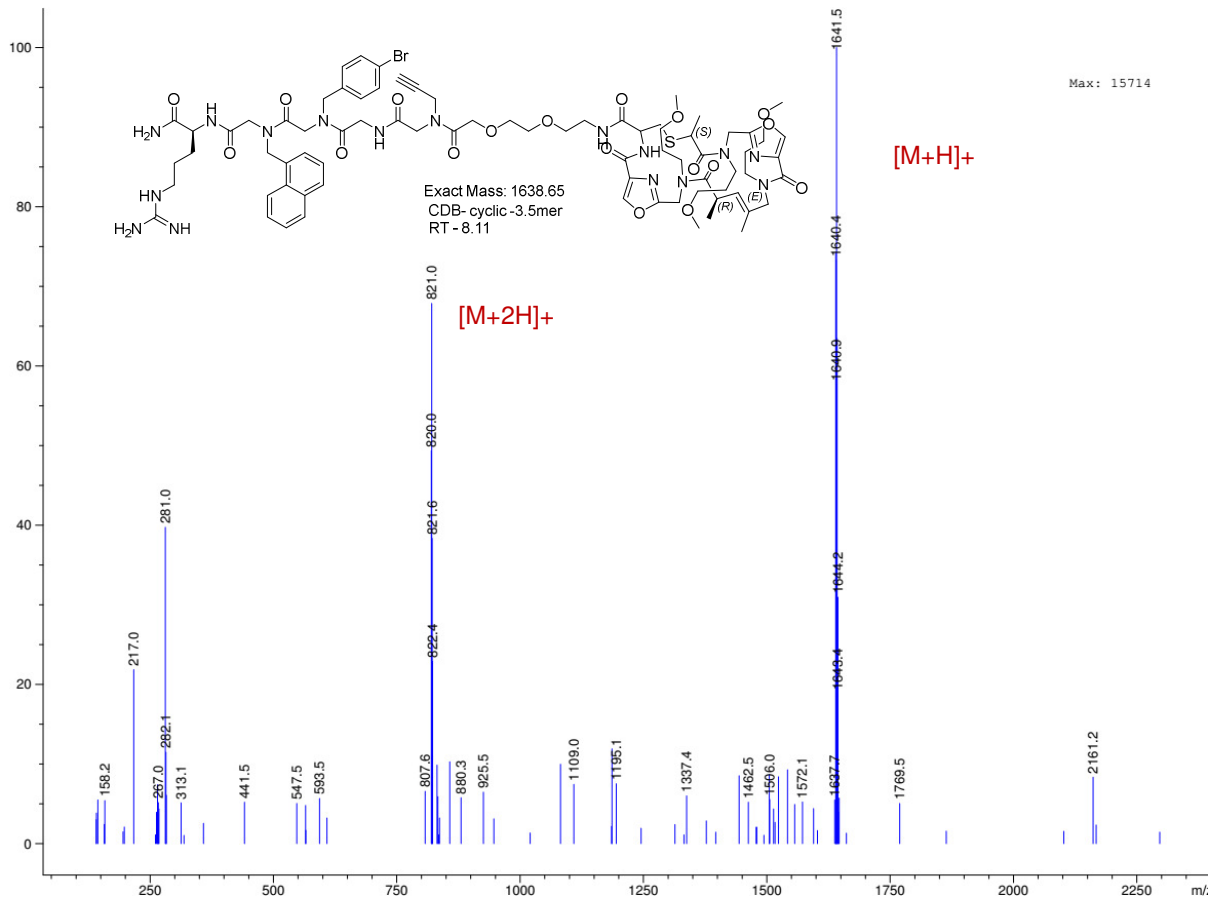



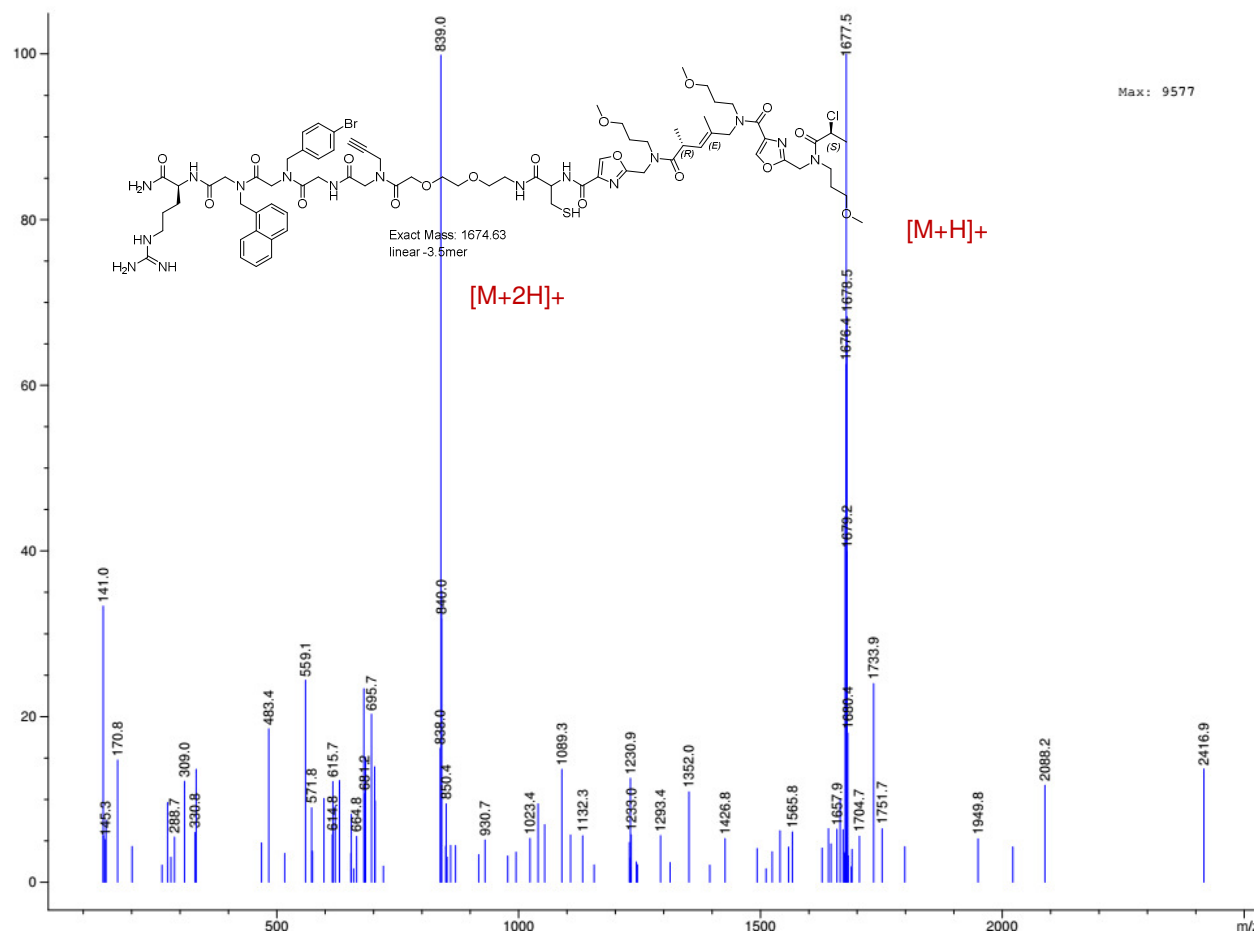

**N1-[DAA]:** Complete cyclization was observed on 10  $\mu\text{m}$  & 160  $\mu\text{m}$  beads.

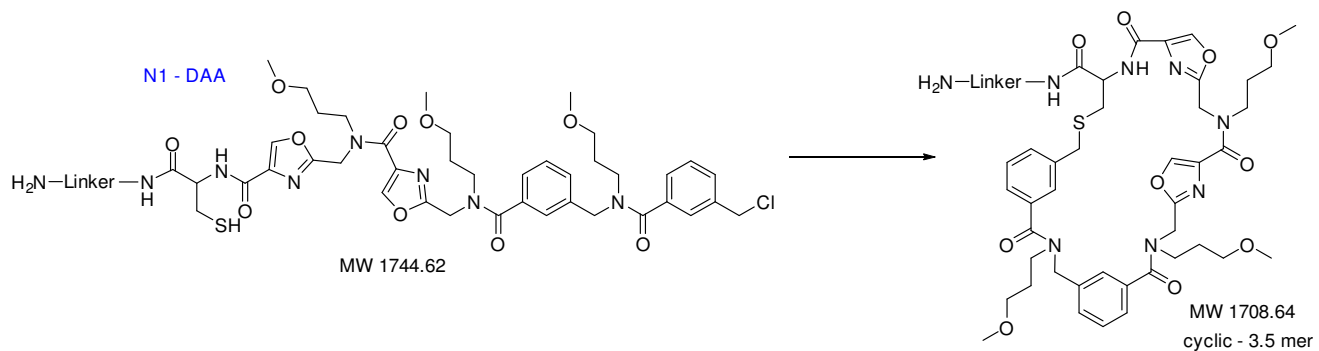

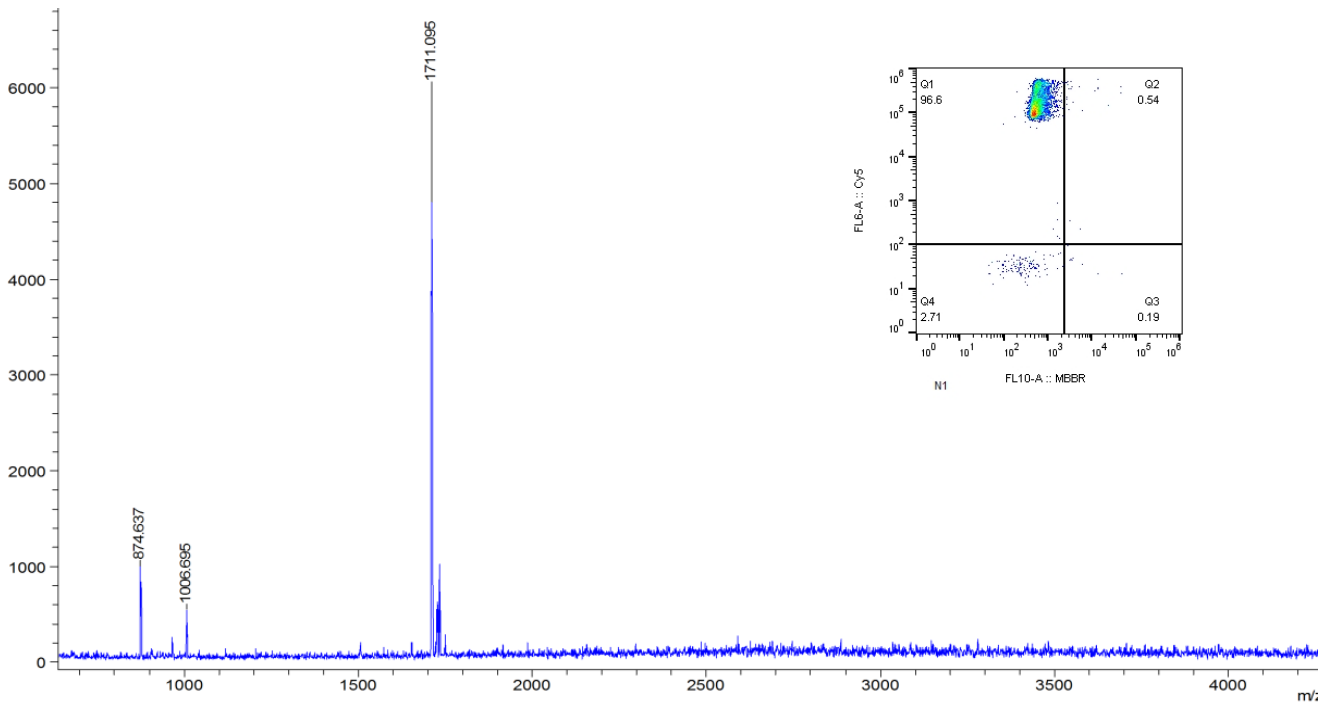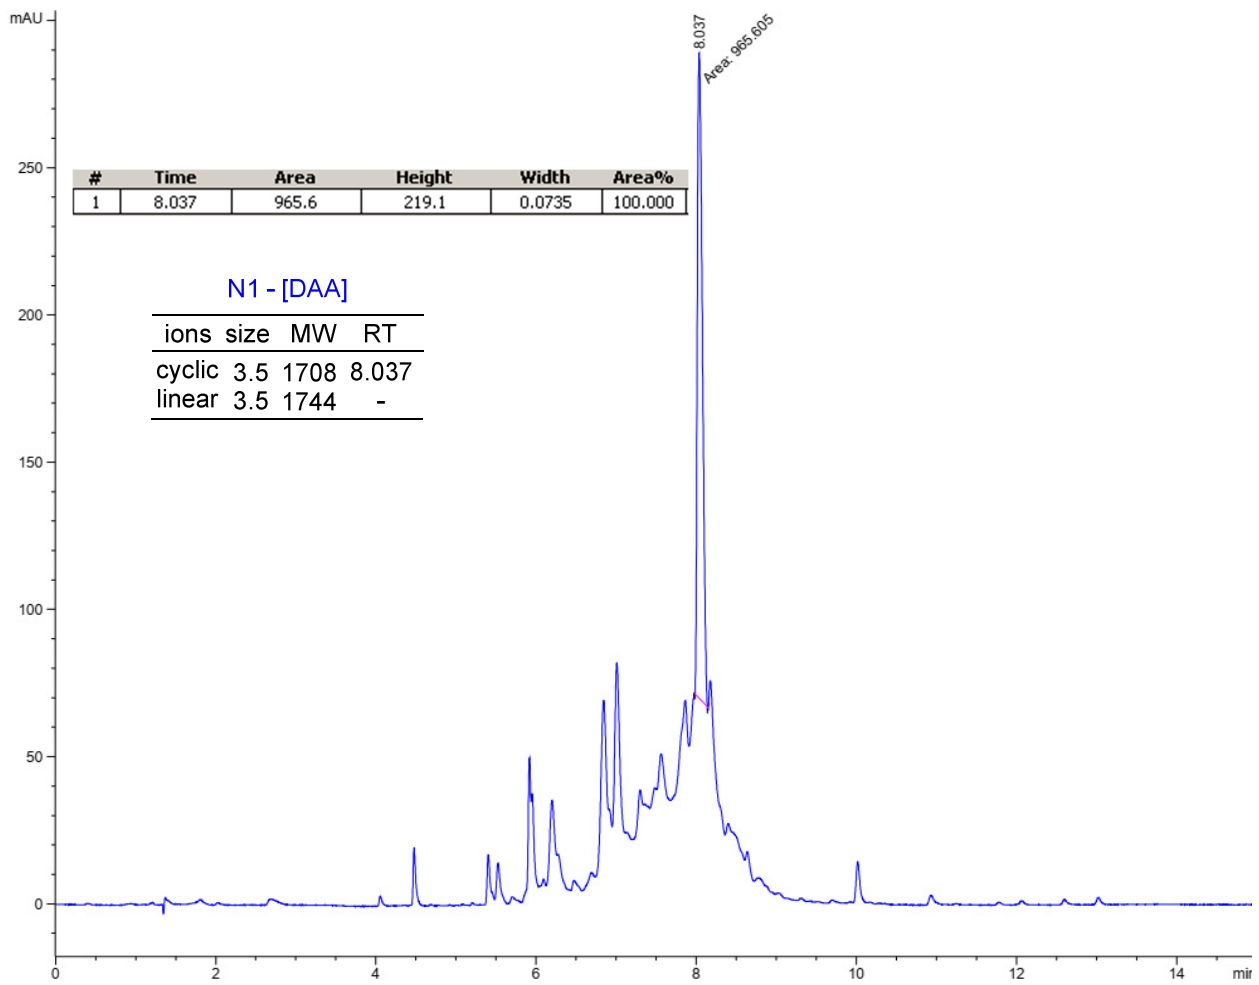

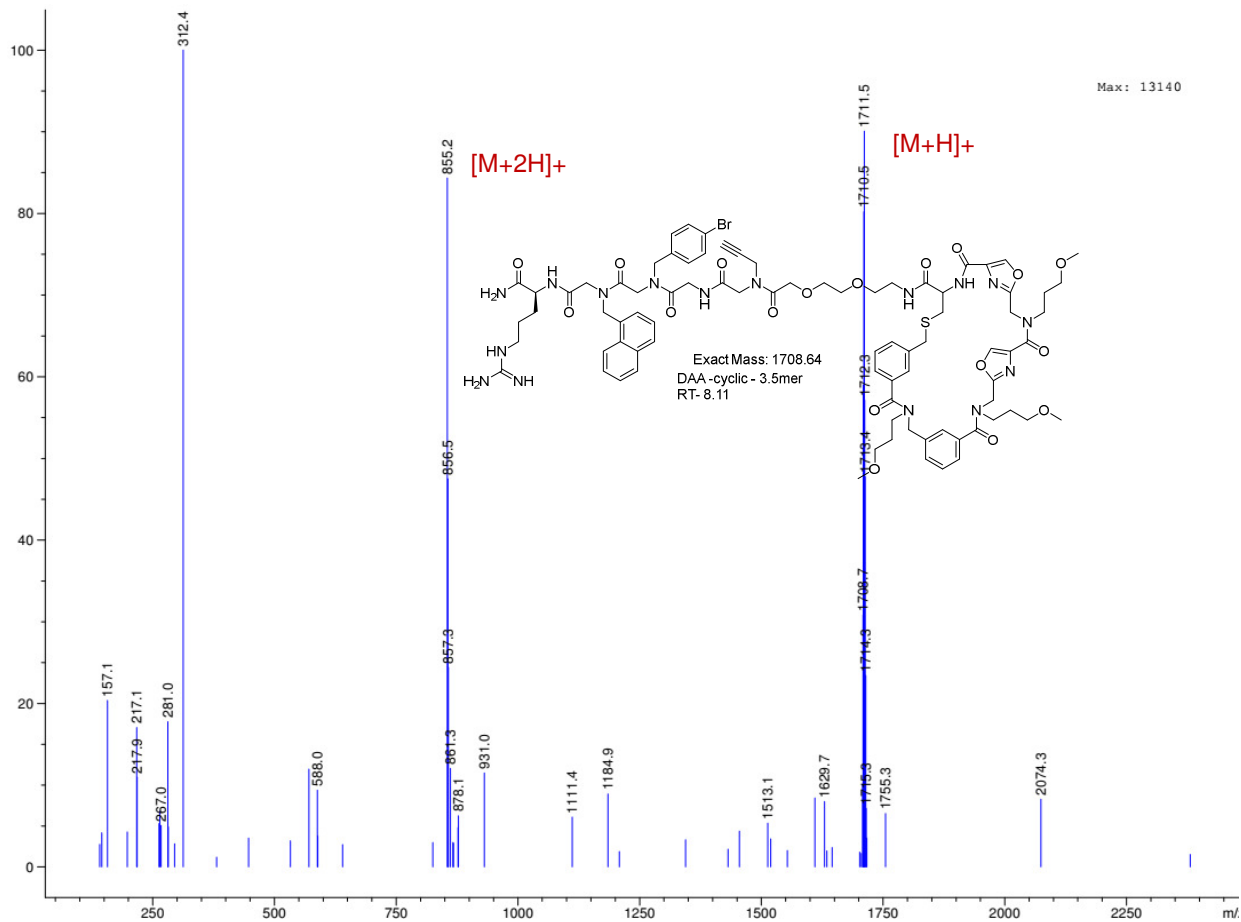

**N2-[DBA]:** Complete cyclization was observed on 10  $\mu\text{m}$  & 160  $\mu\text{m}$  beads.

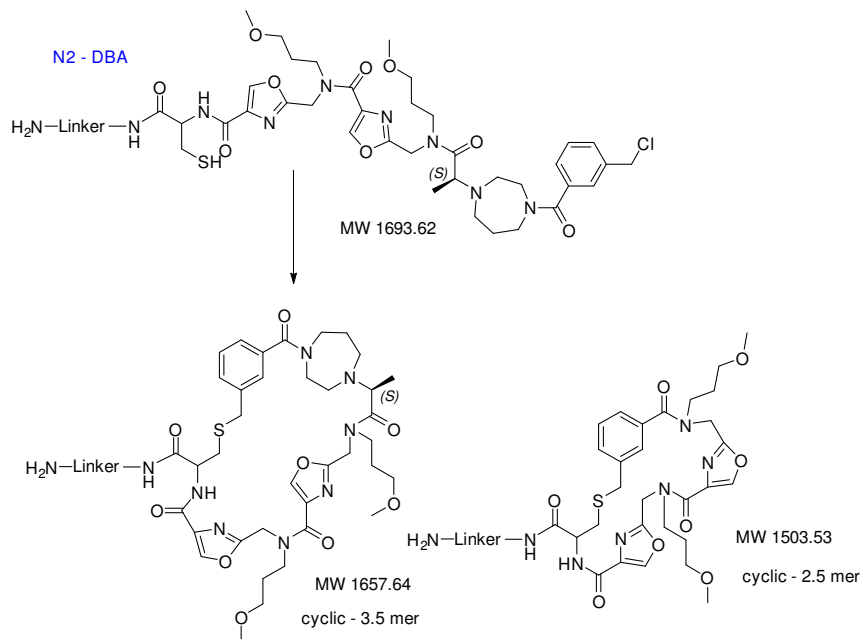

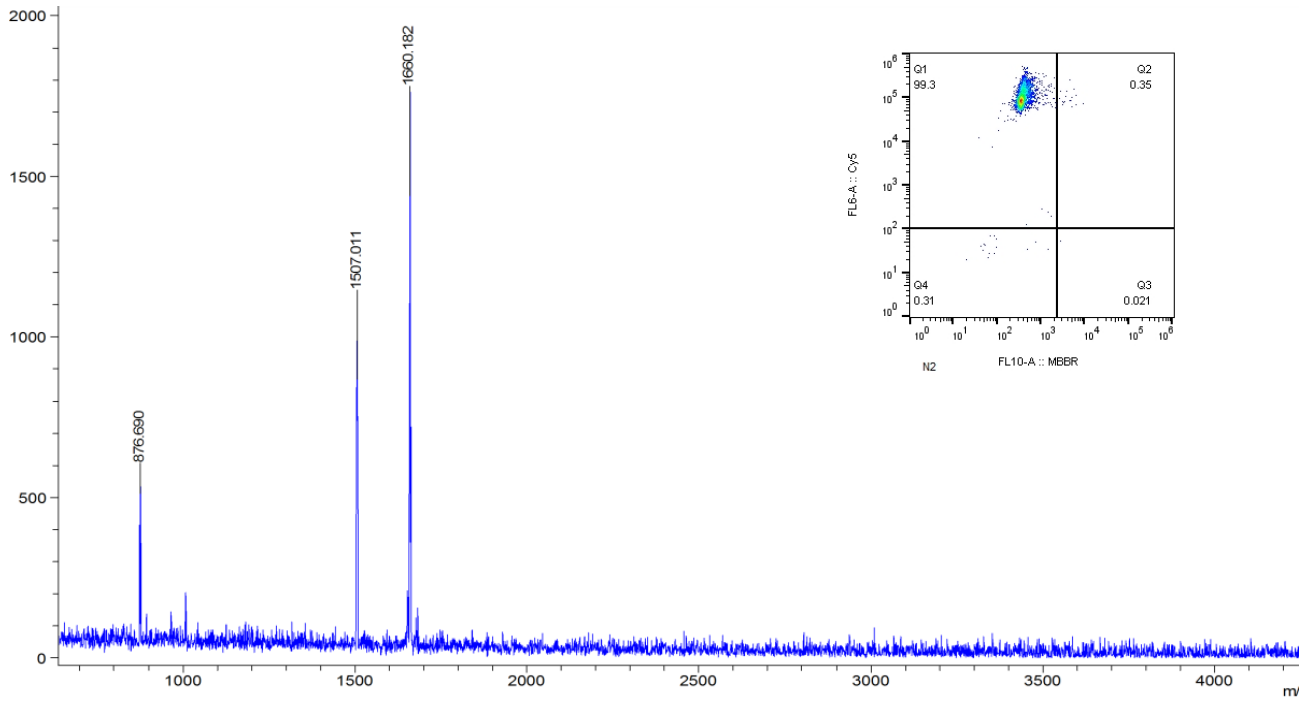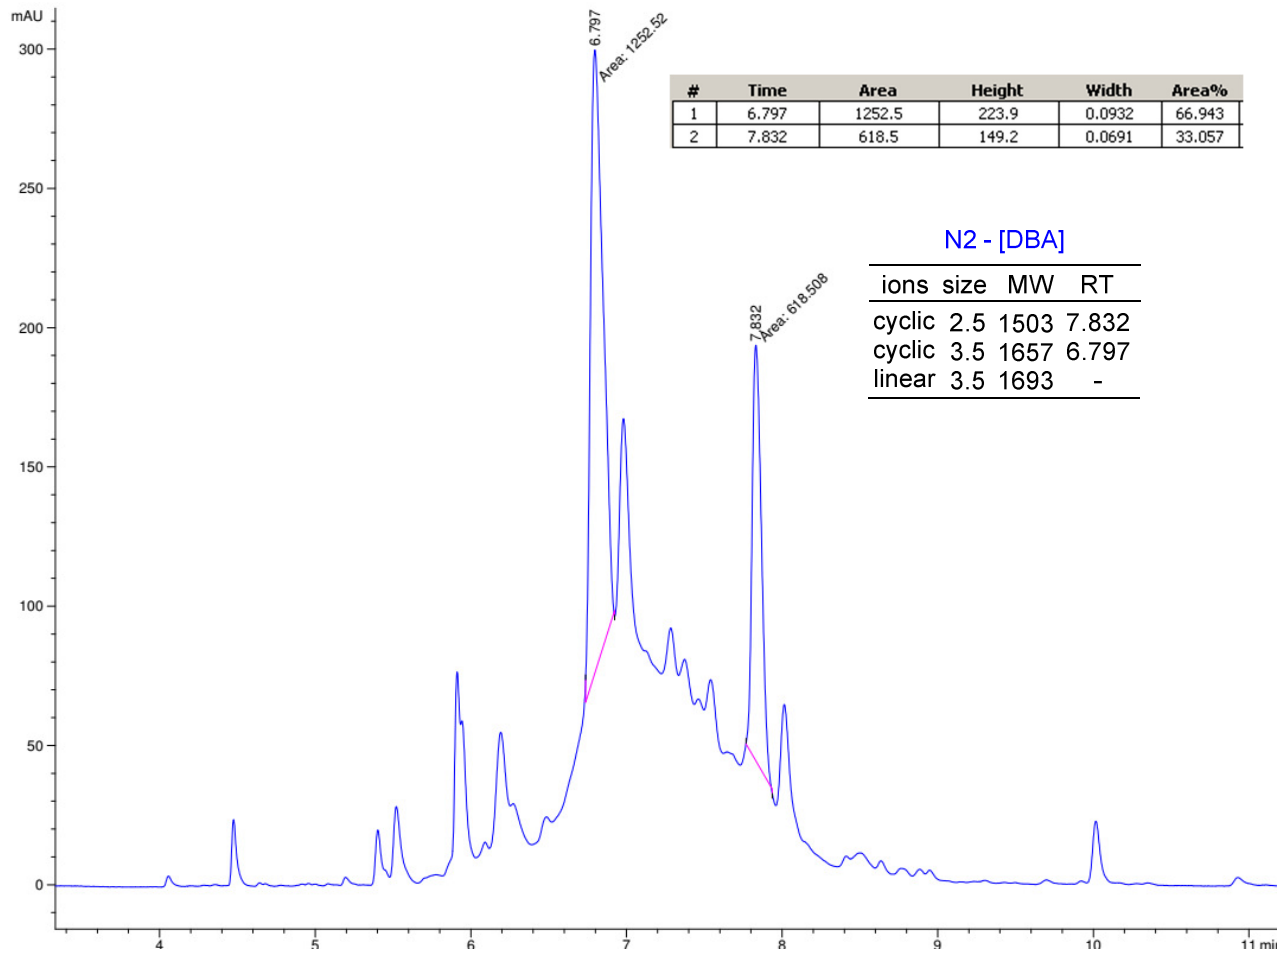

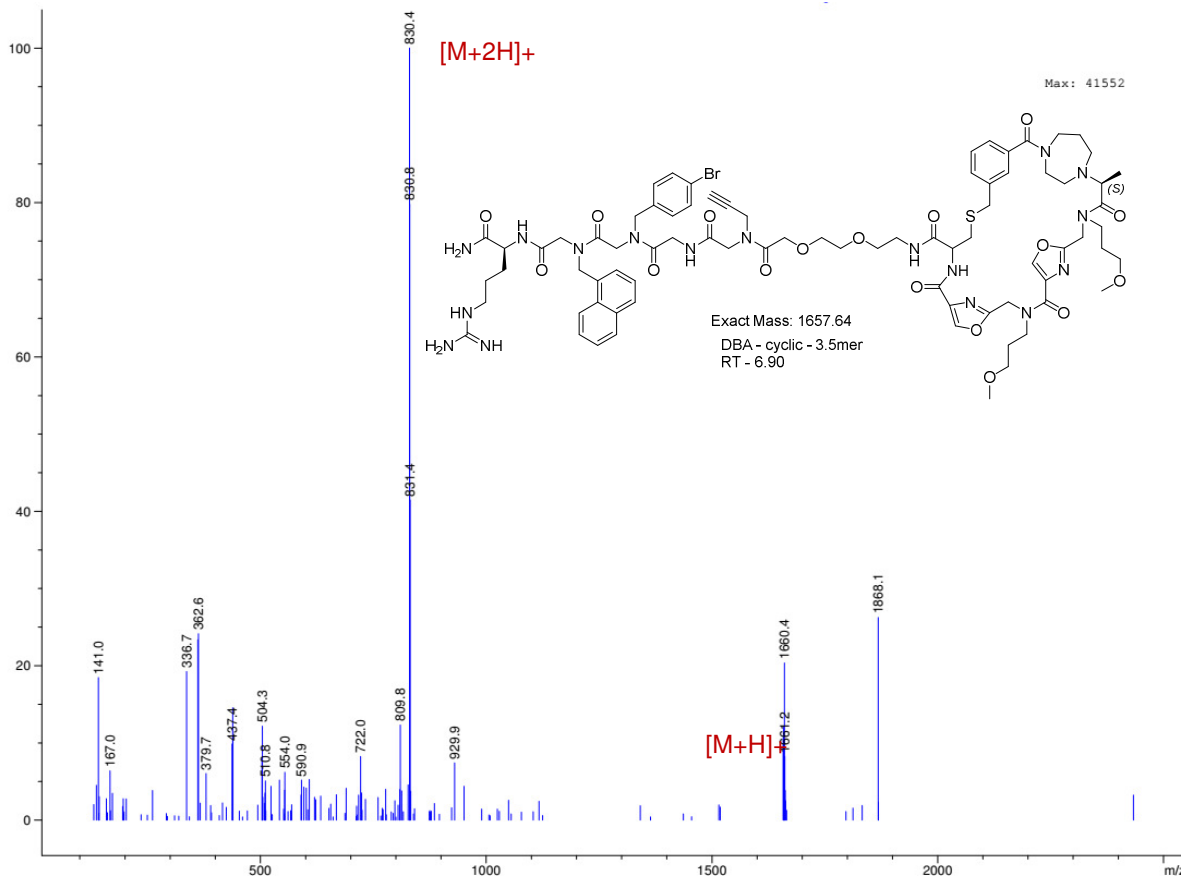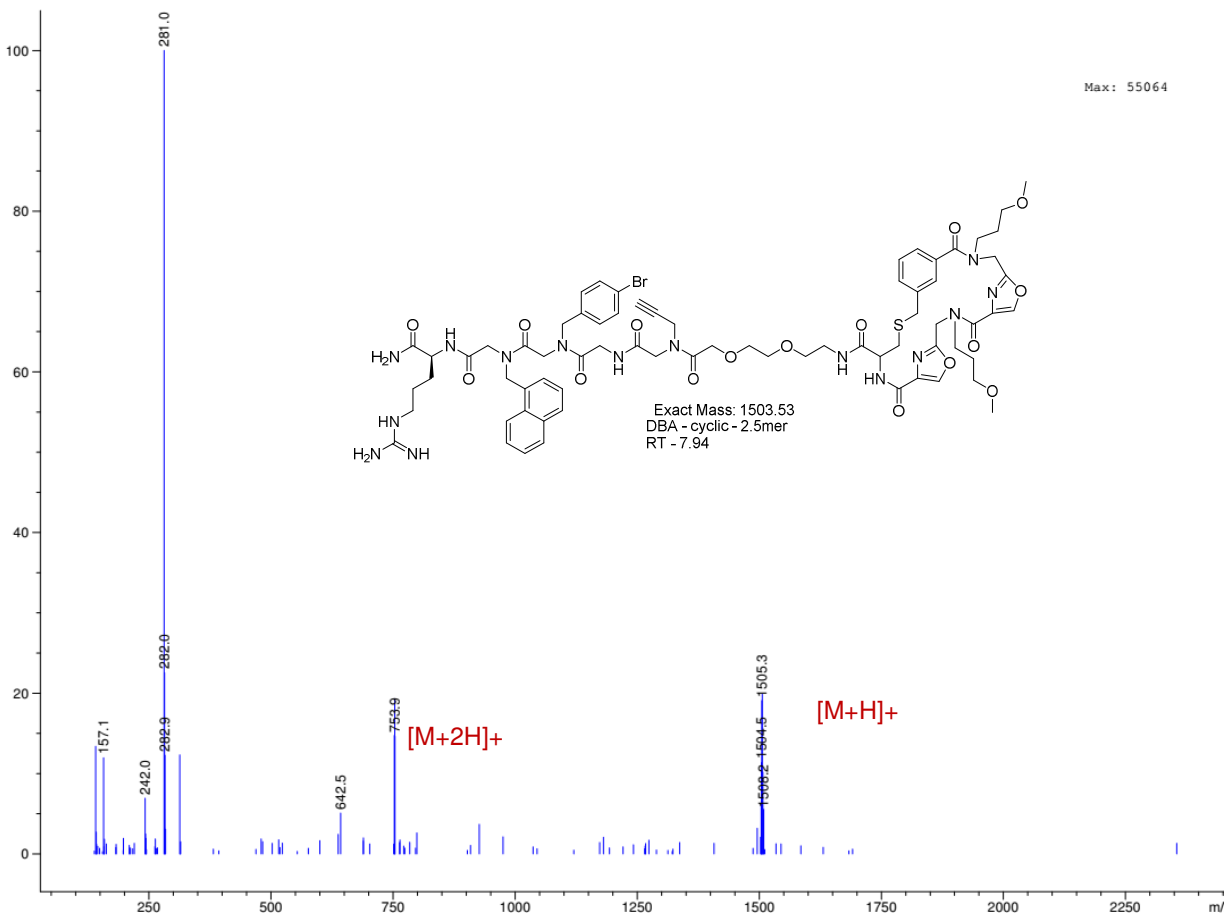

**N3-[DCA]:** Complete cyclization was observed on 10  $\mu\text{m}$  & 160  $\mu\text{m}$  beads.

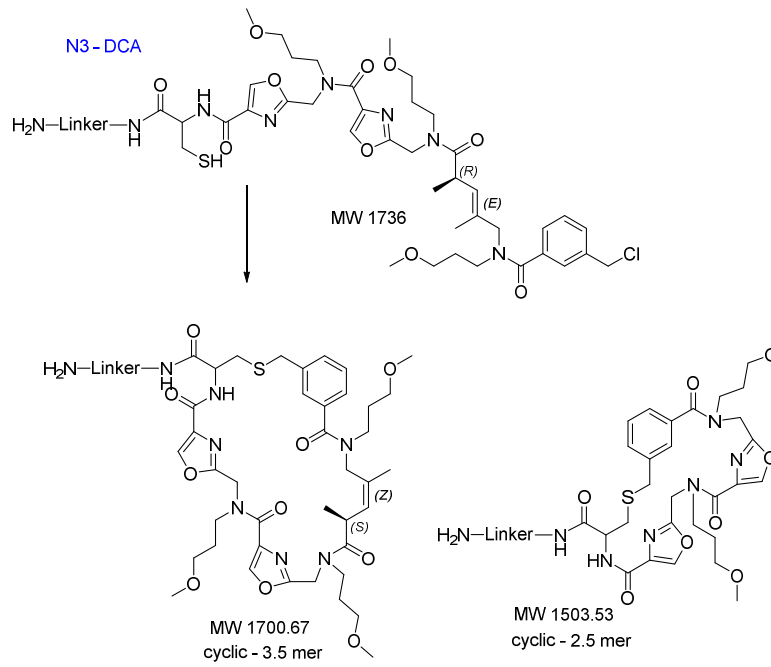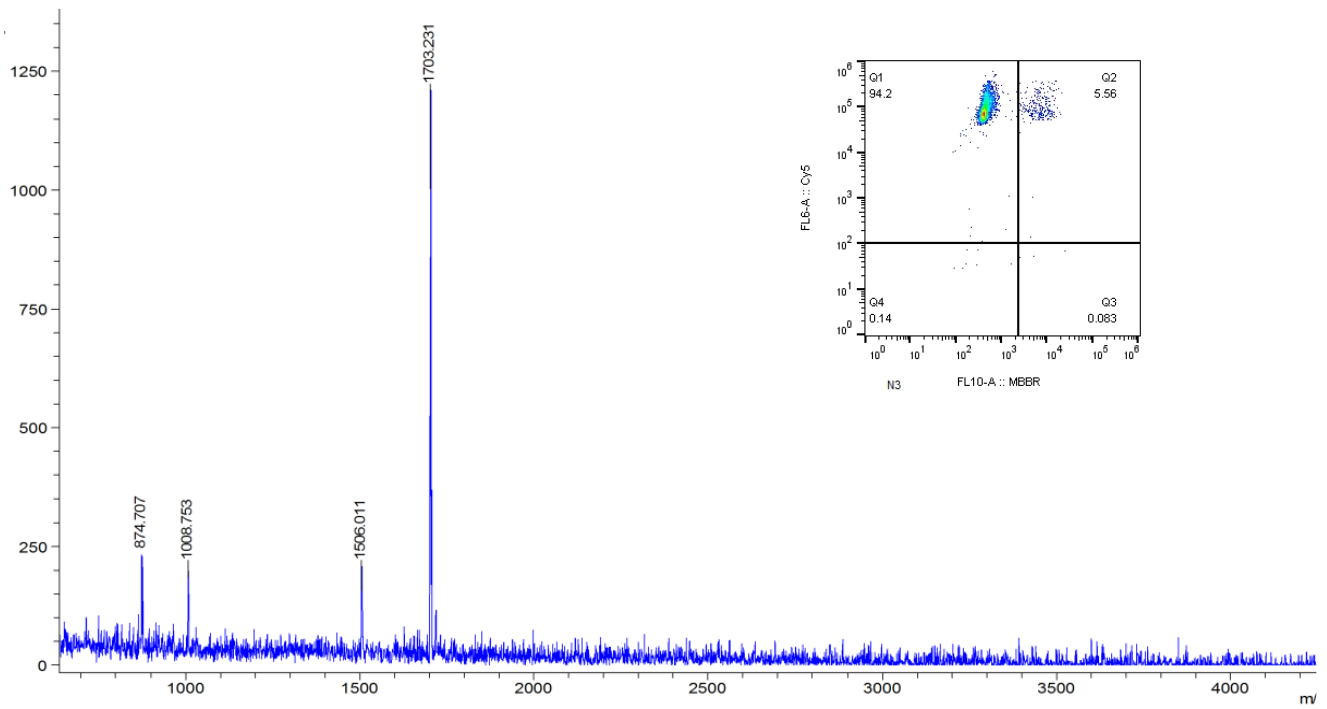

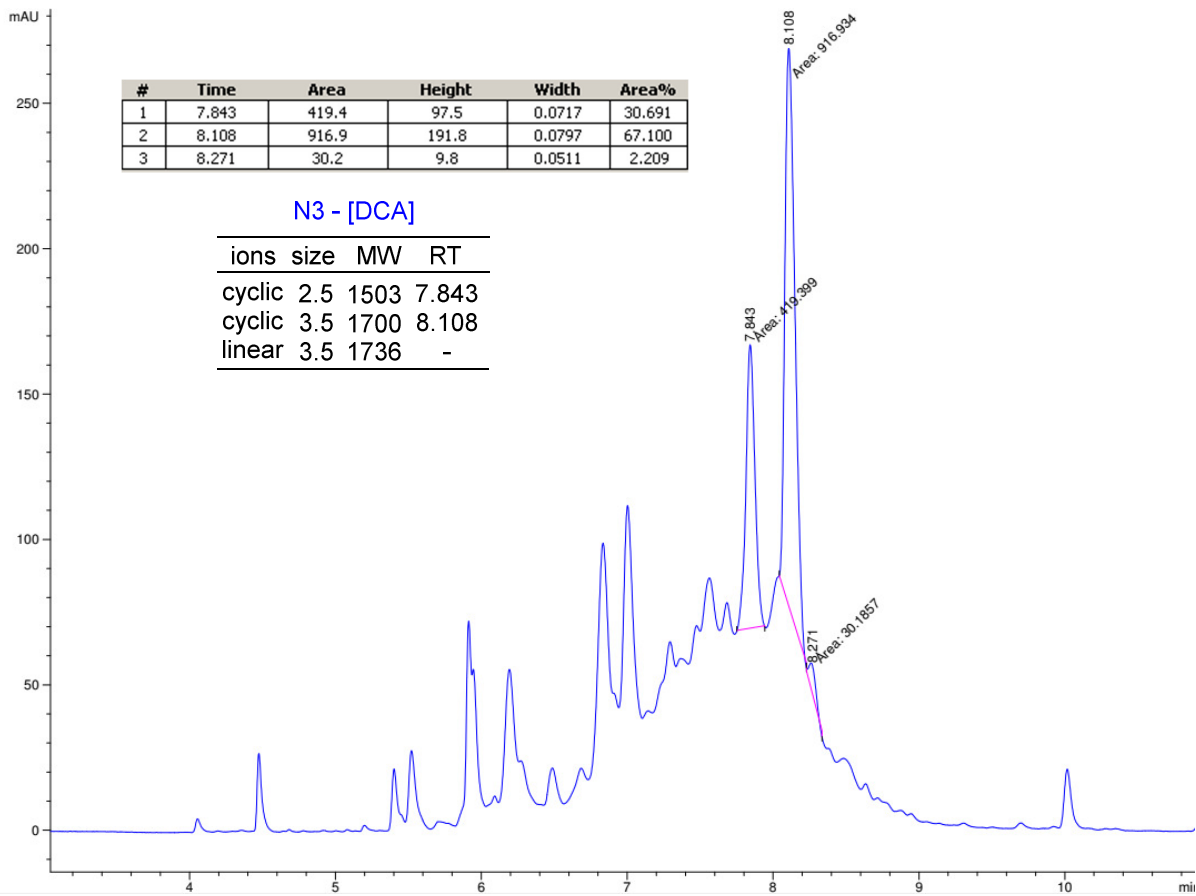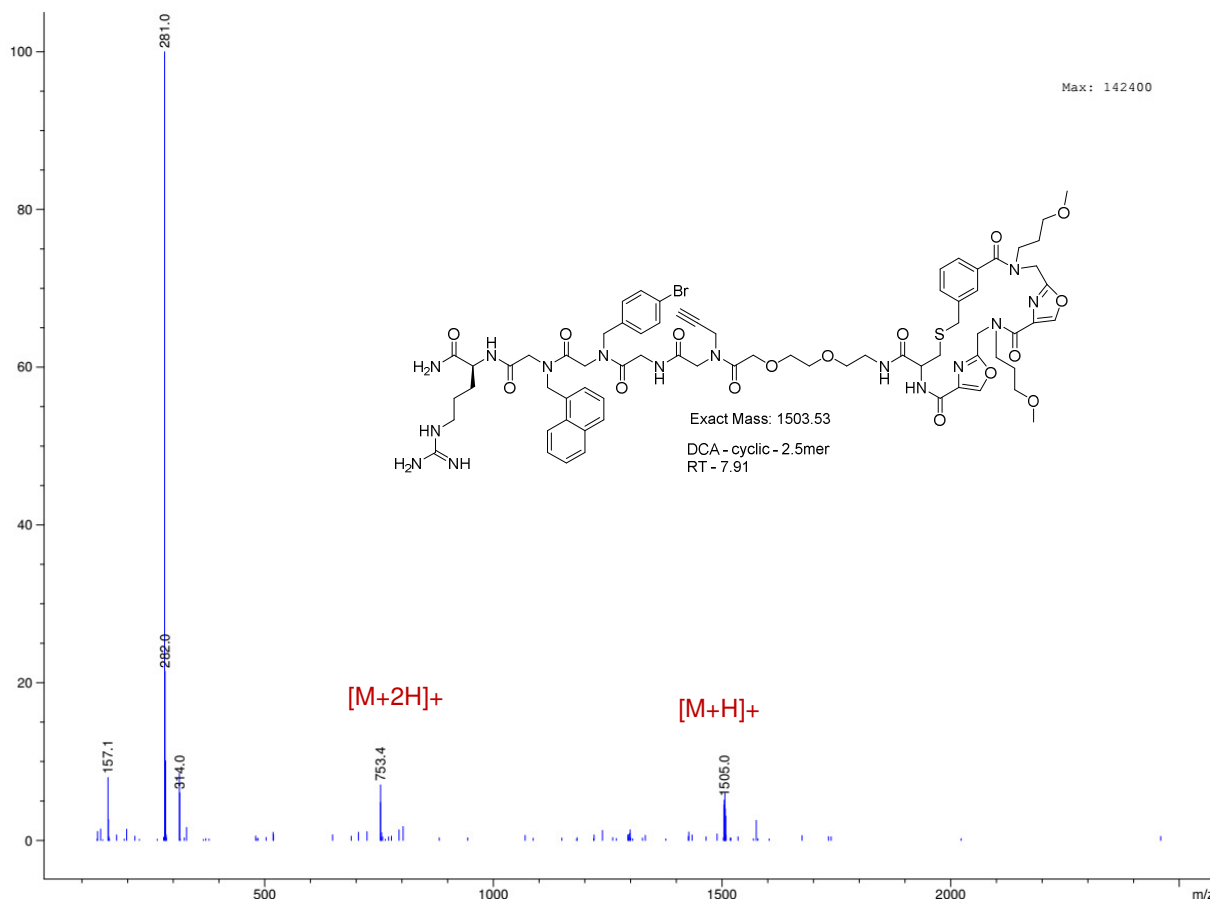

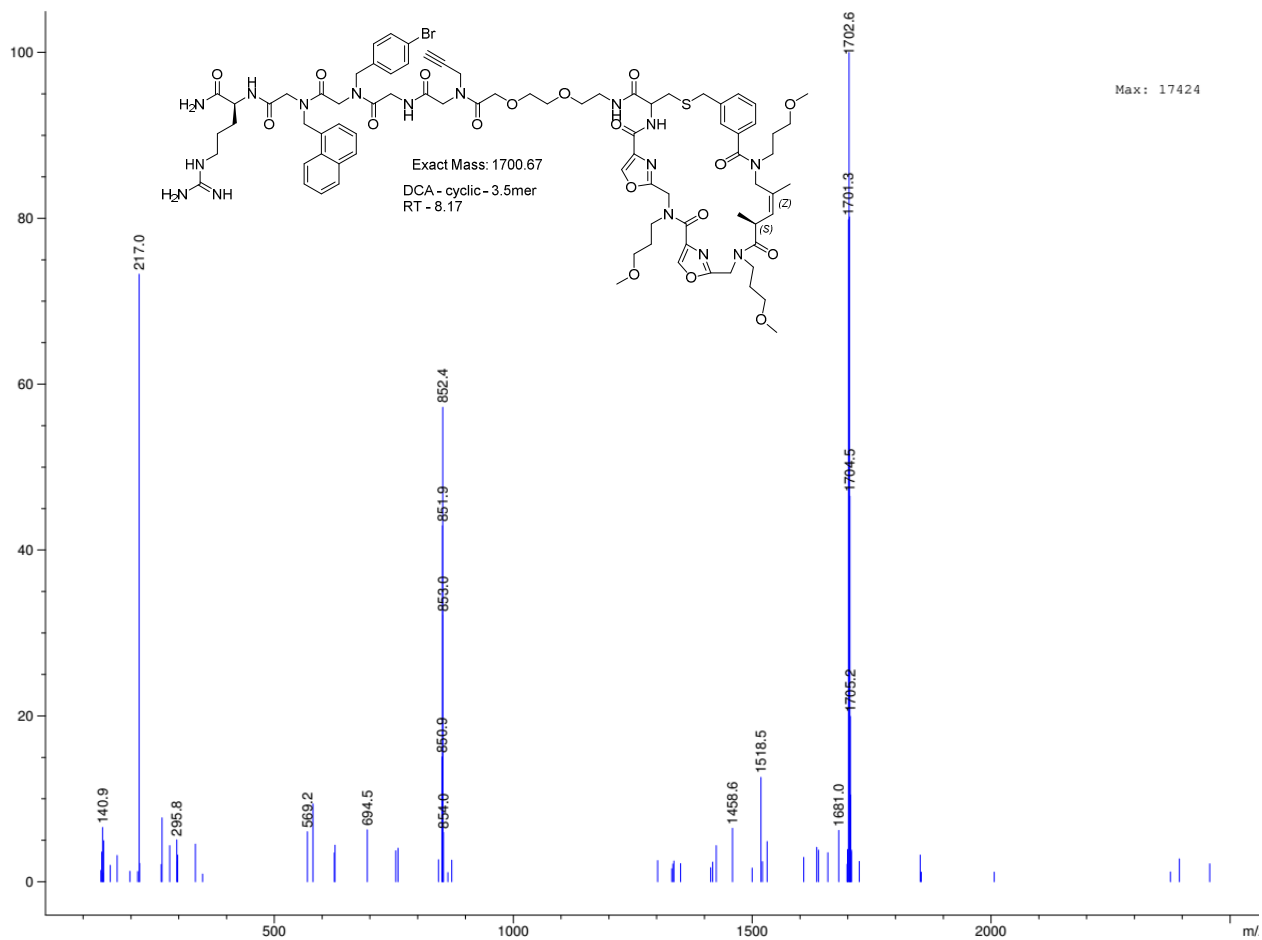

**N4-[DDA]:** Complete cyclization was observed on 10  $\mu\text{m}$  & 160  $\mu\text{m}$  beads.

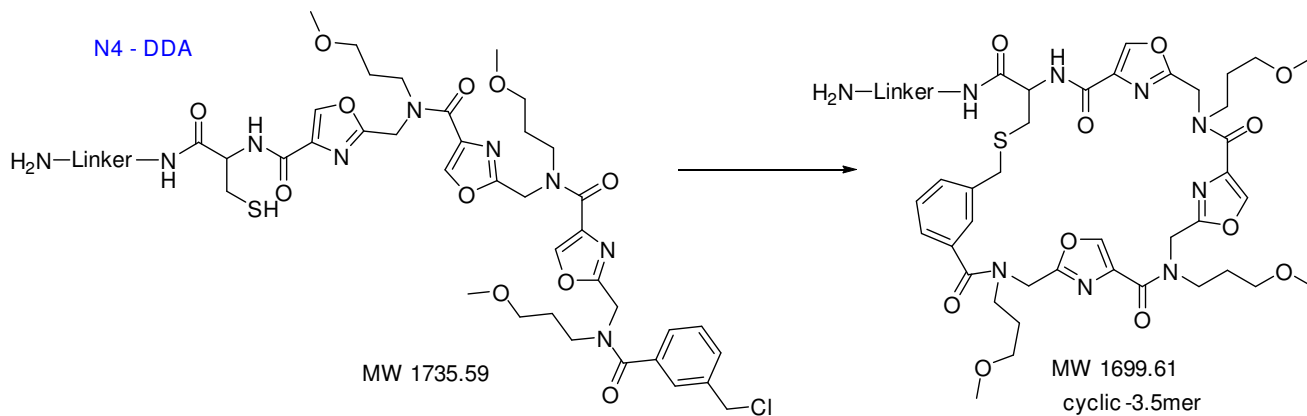



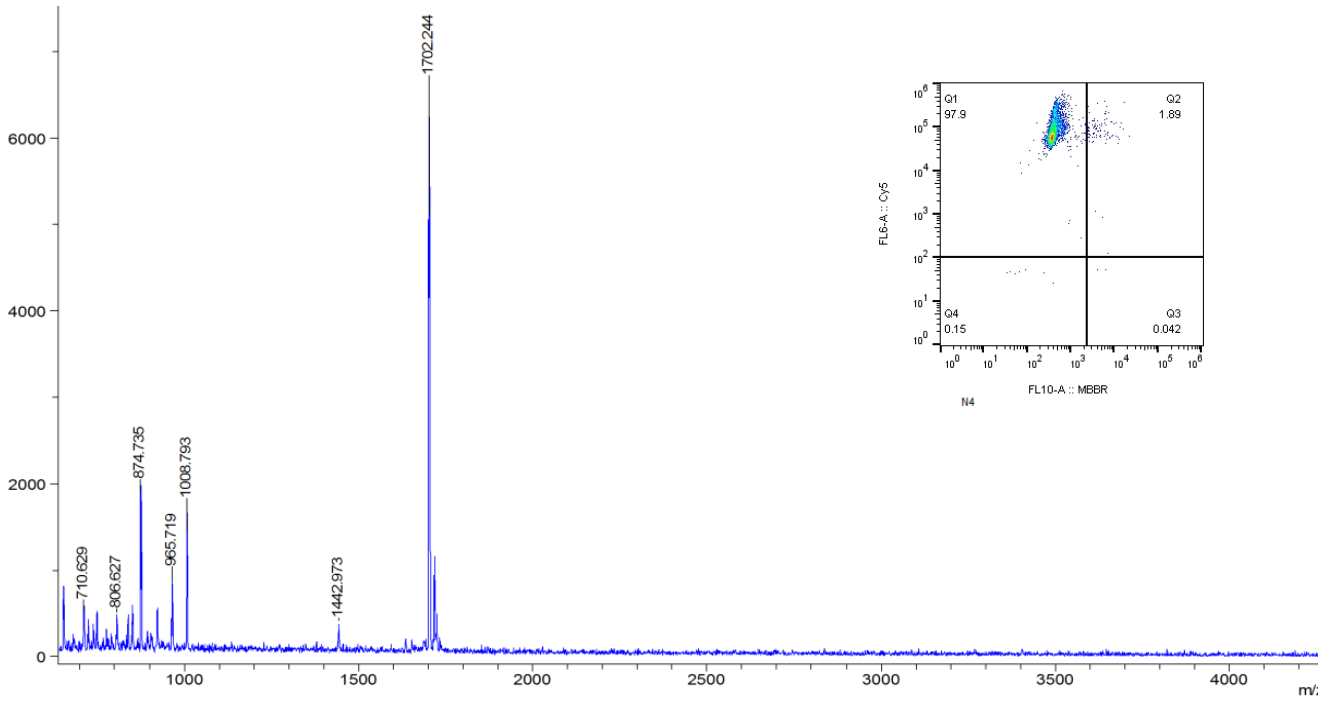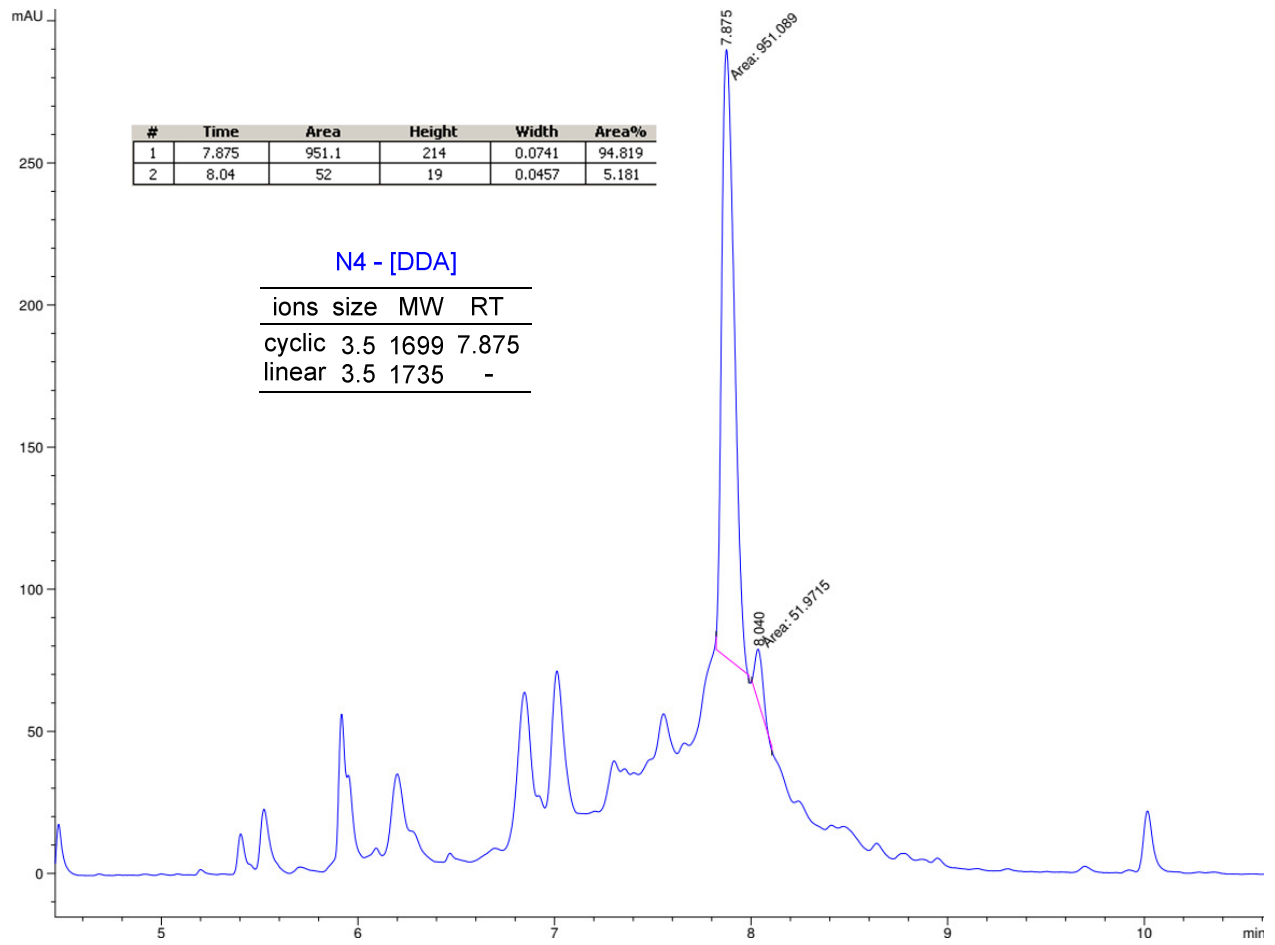

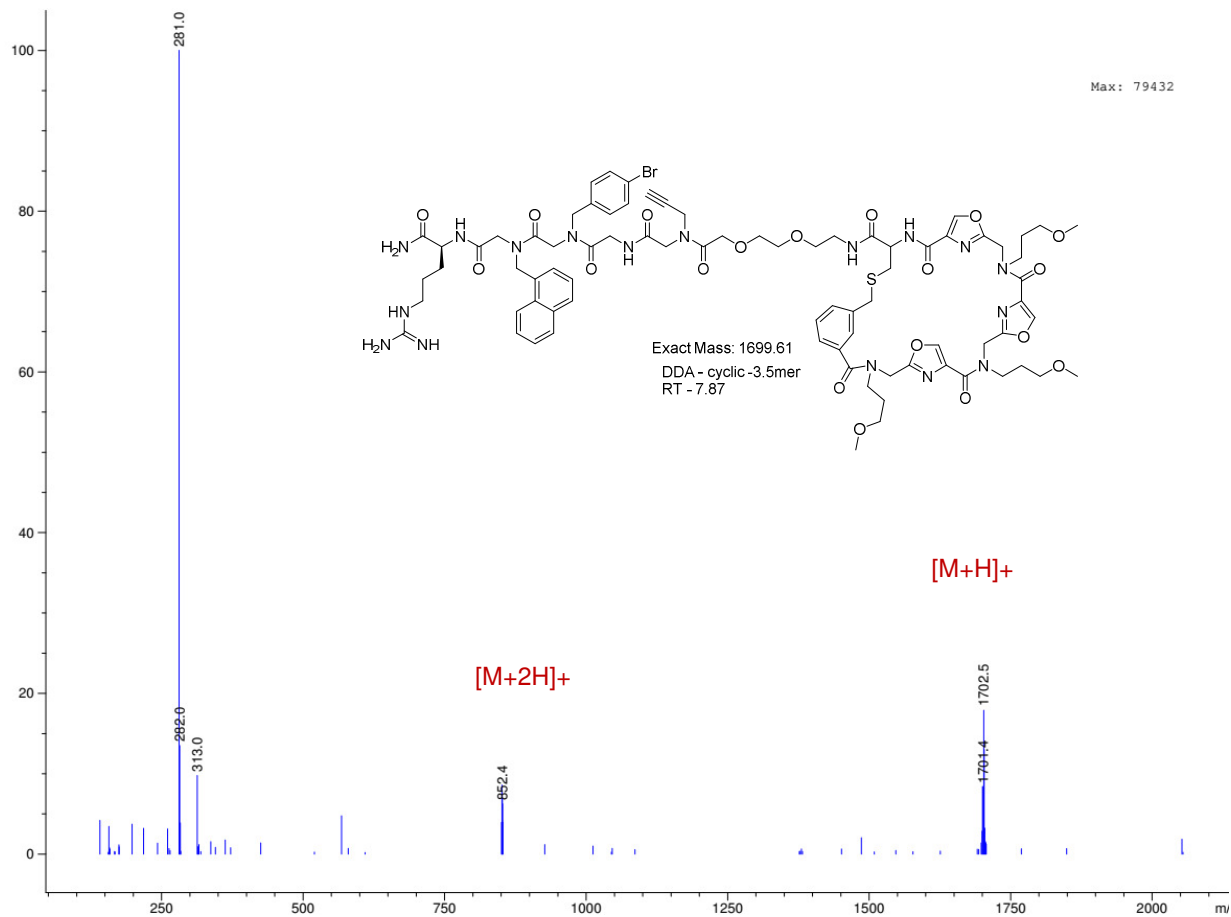

**N7-[DAB]:** Complete cyclization was detected on 10  $\mu\text{m}$  but was incomplete on 160  $\mu\text{m}$  beads.

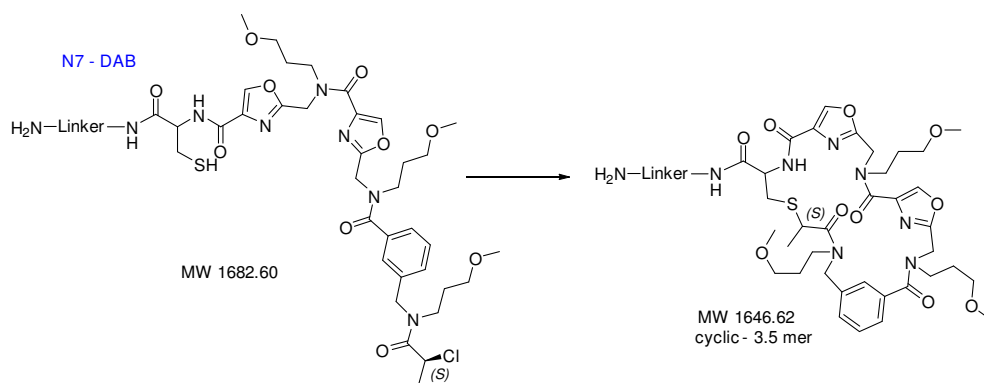

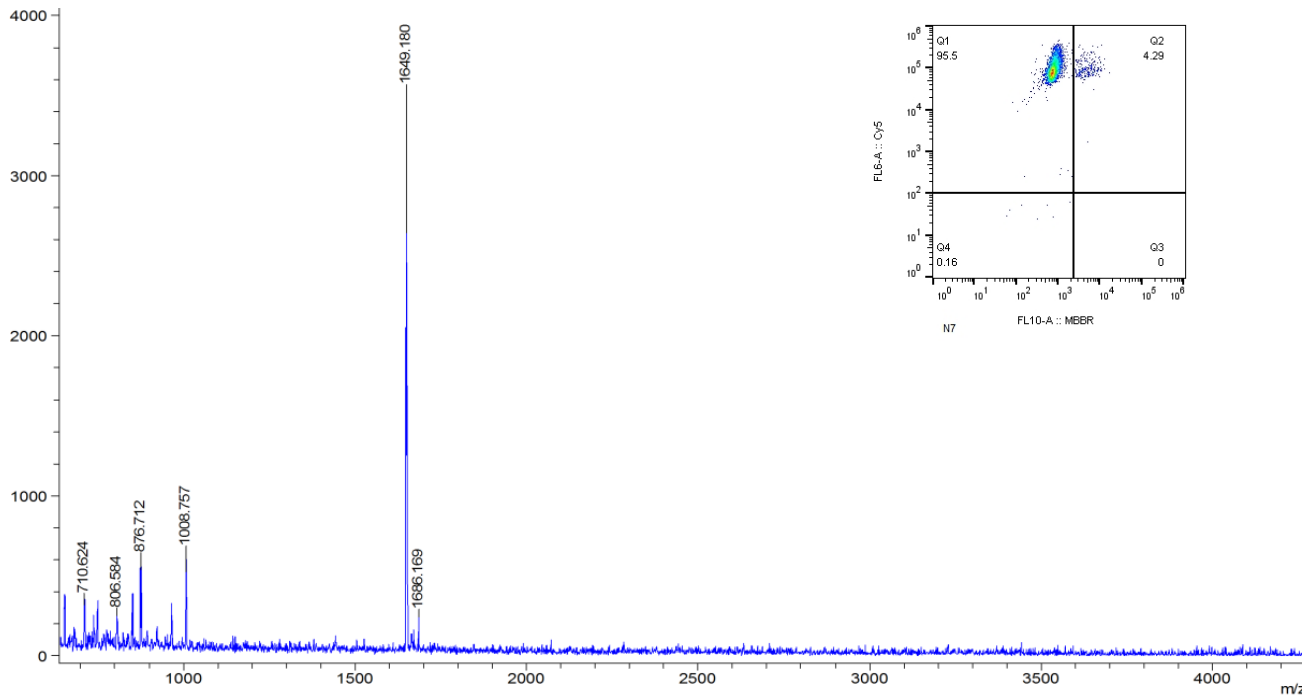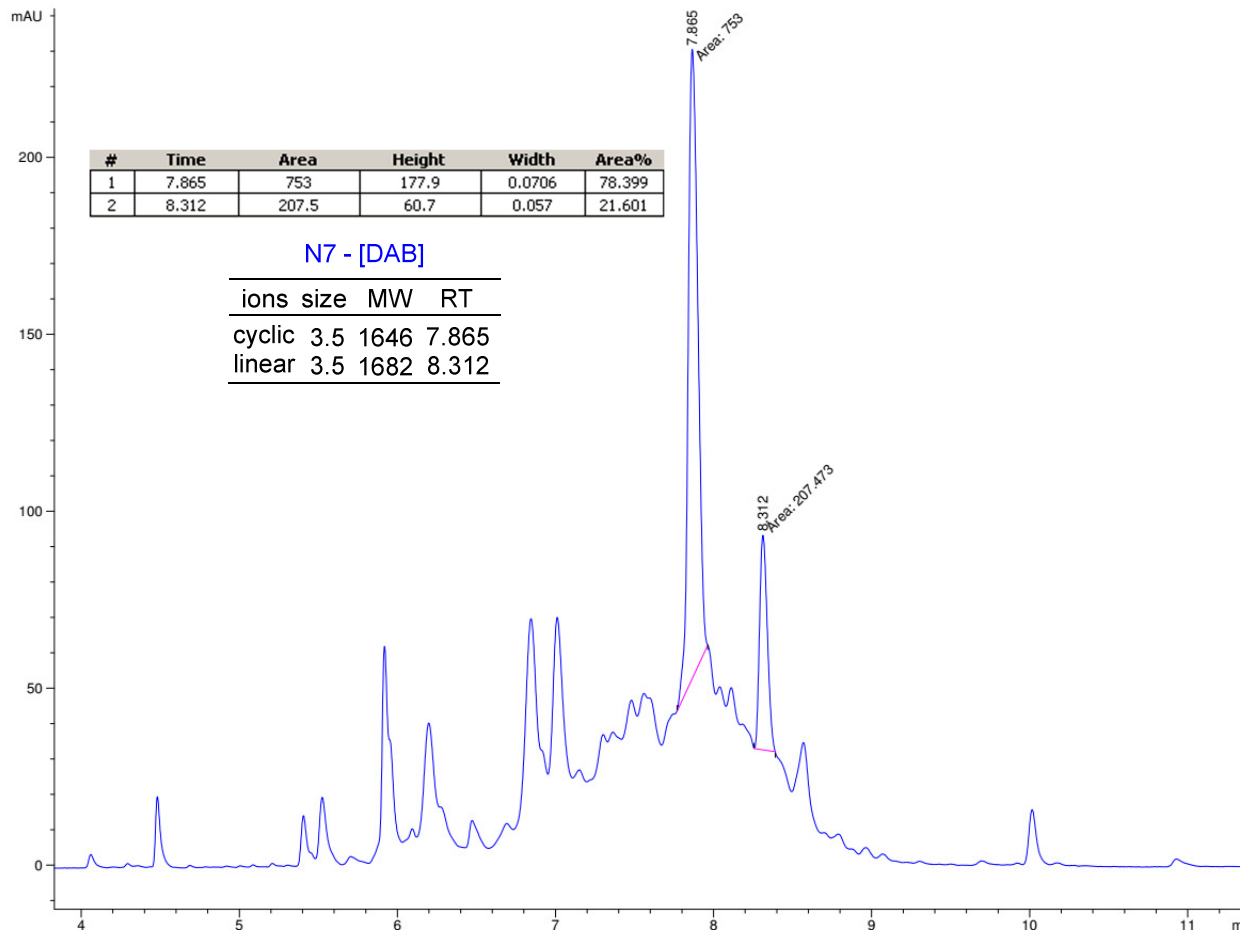

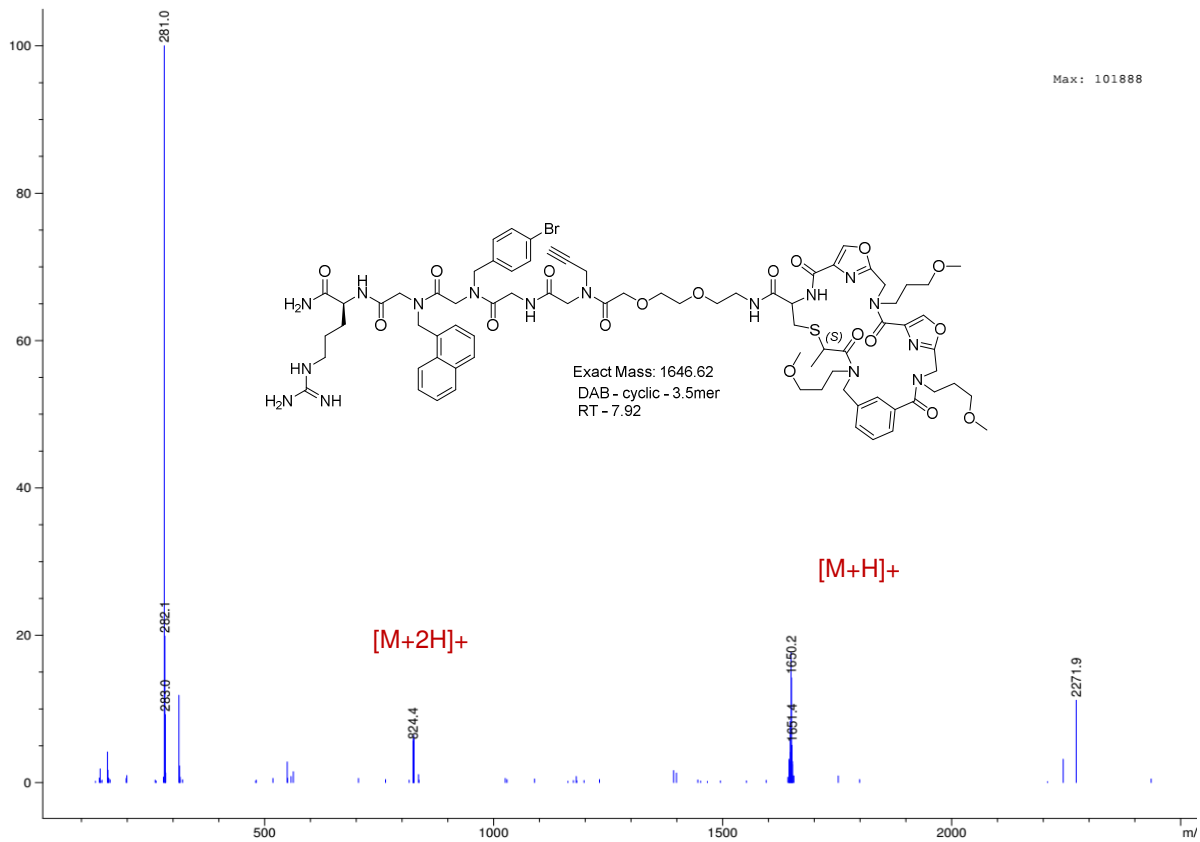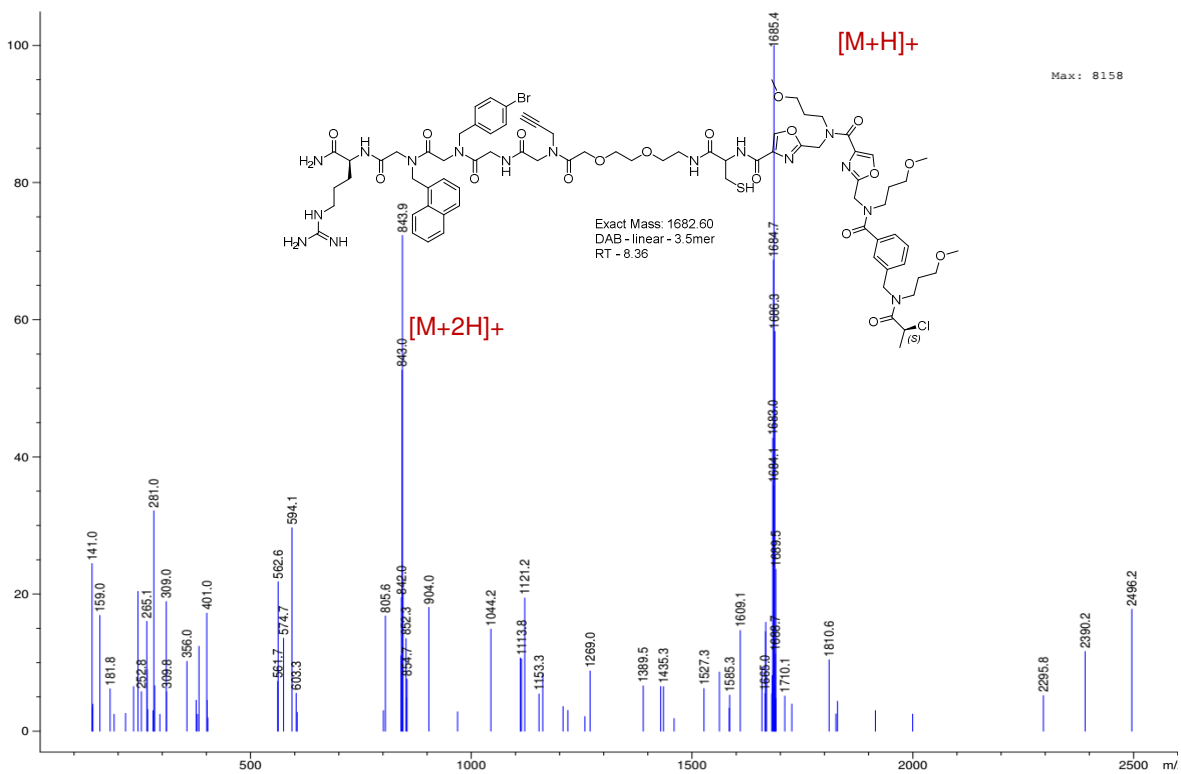

**N8-[DBB]:** Complete cyclization was detected on 10 μm but was incomplete on 160 μm beads.

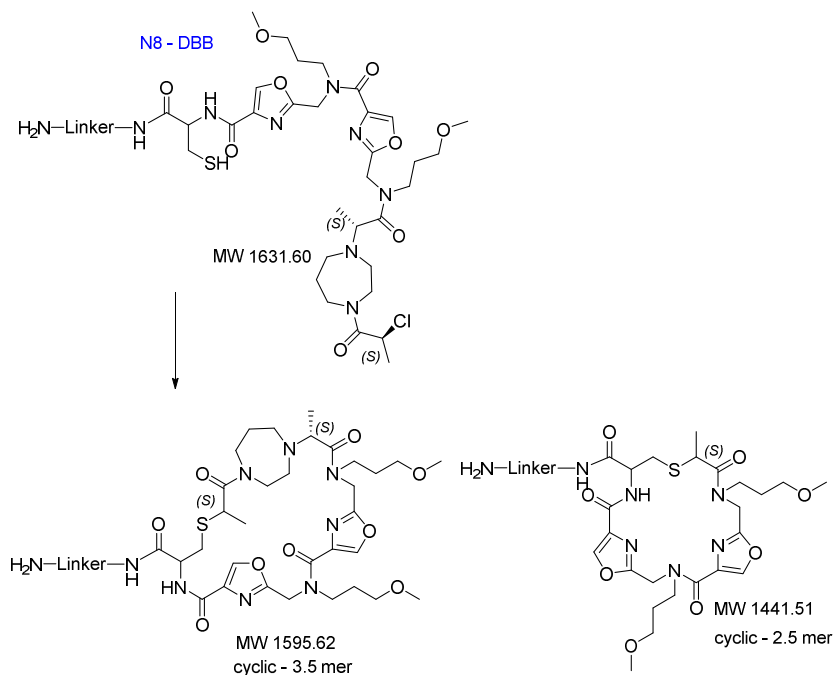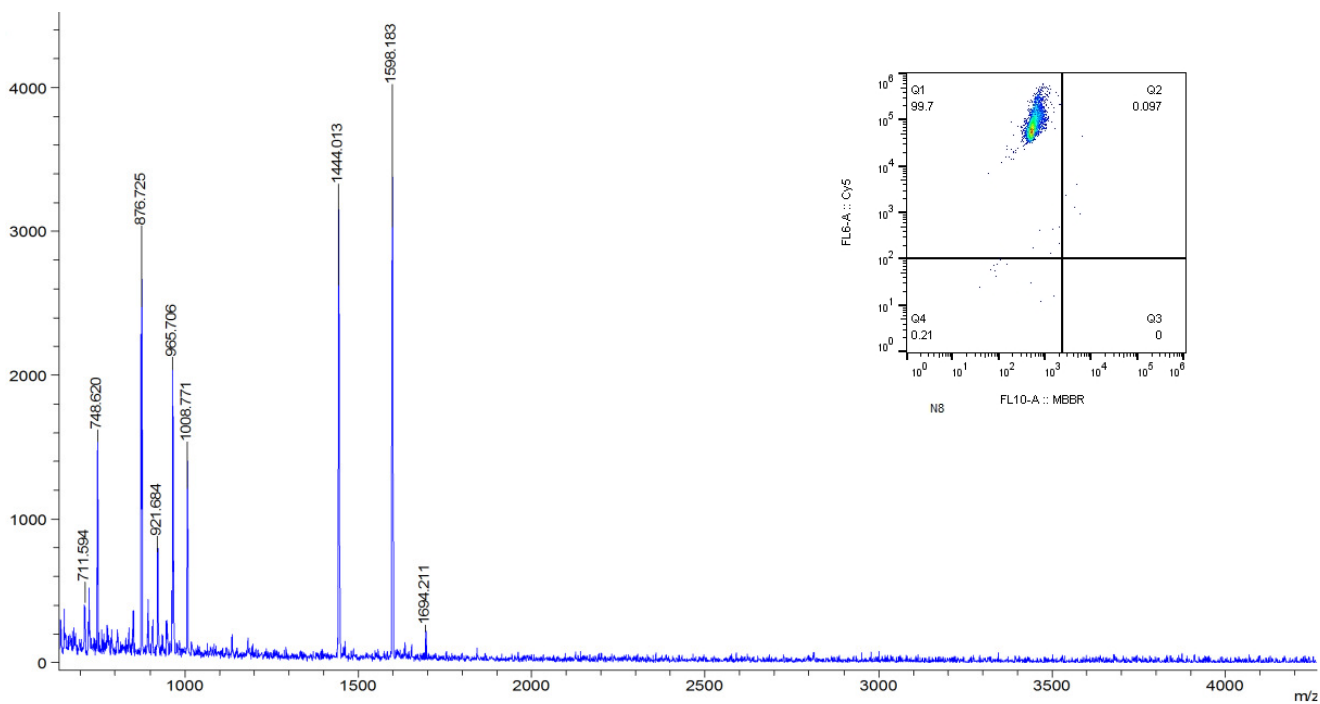

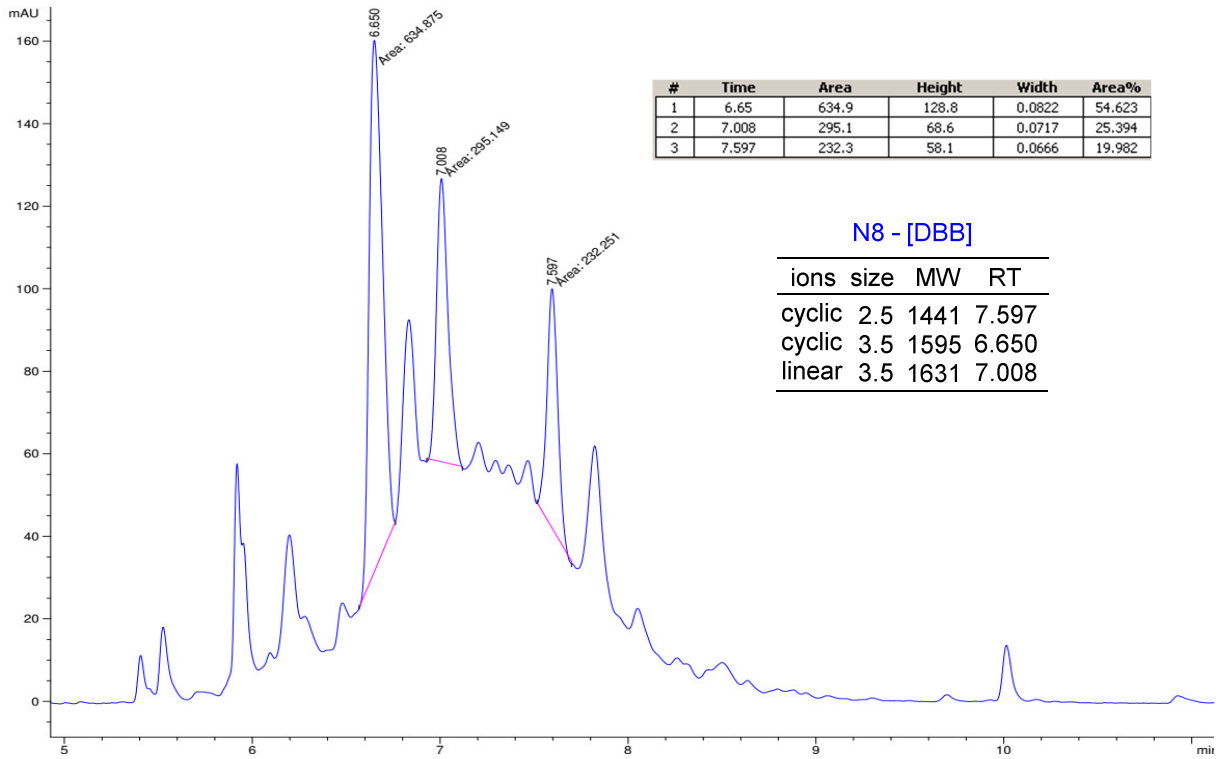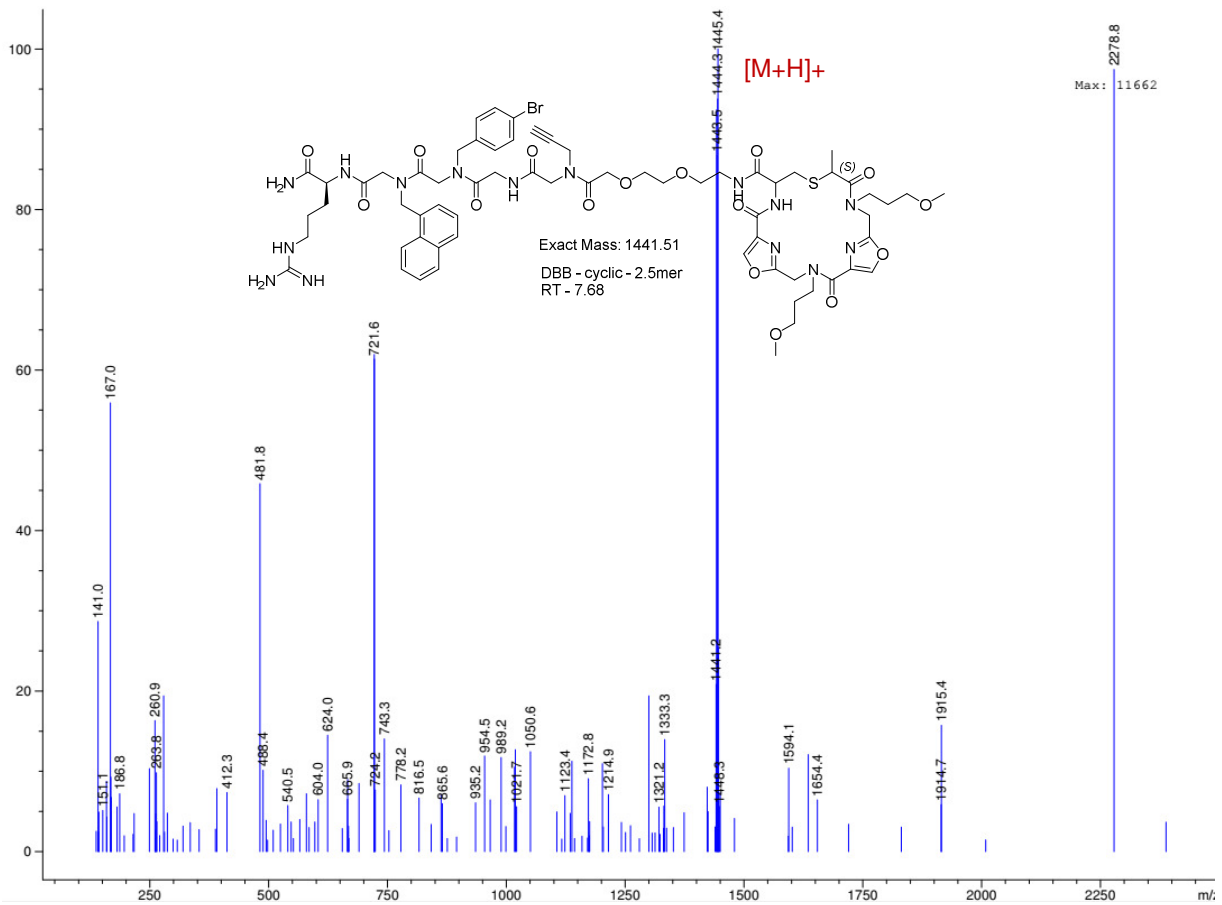

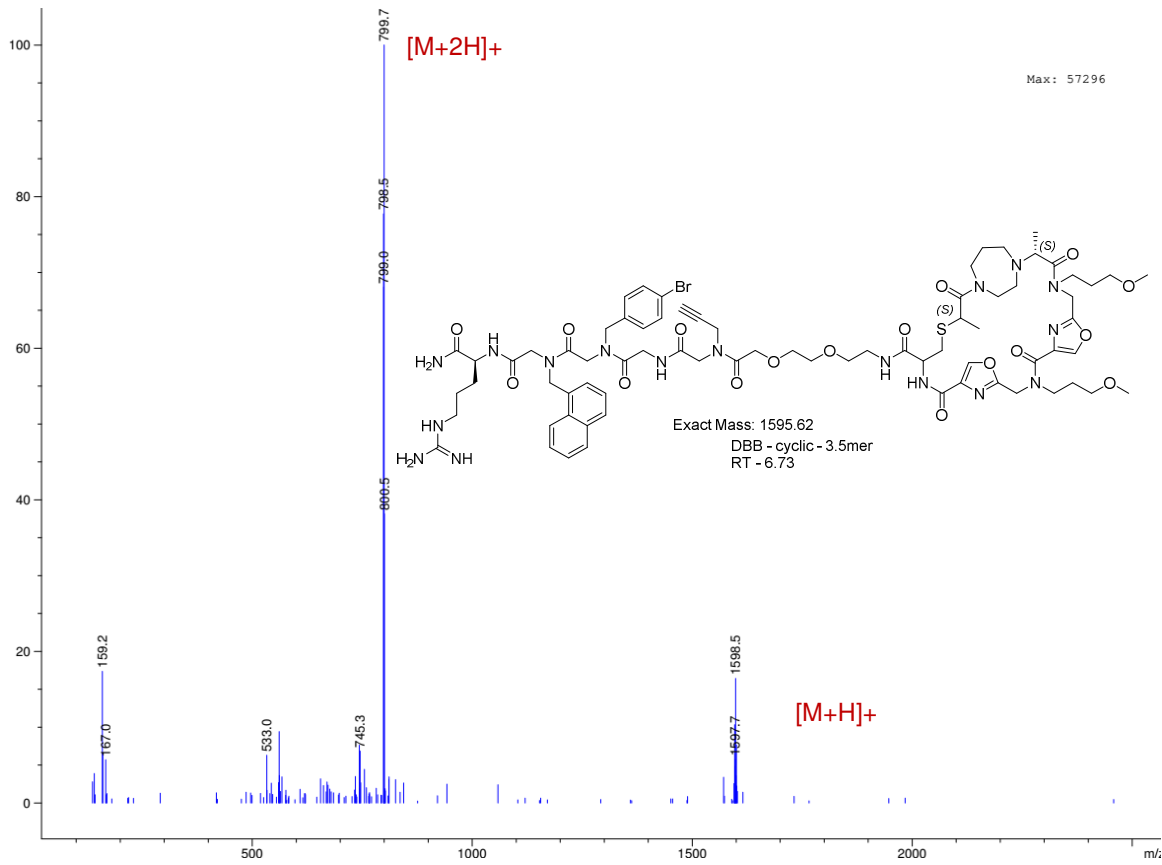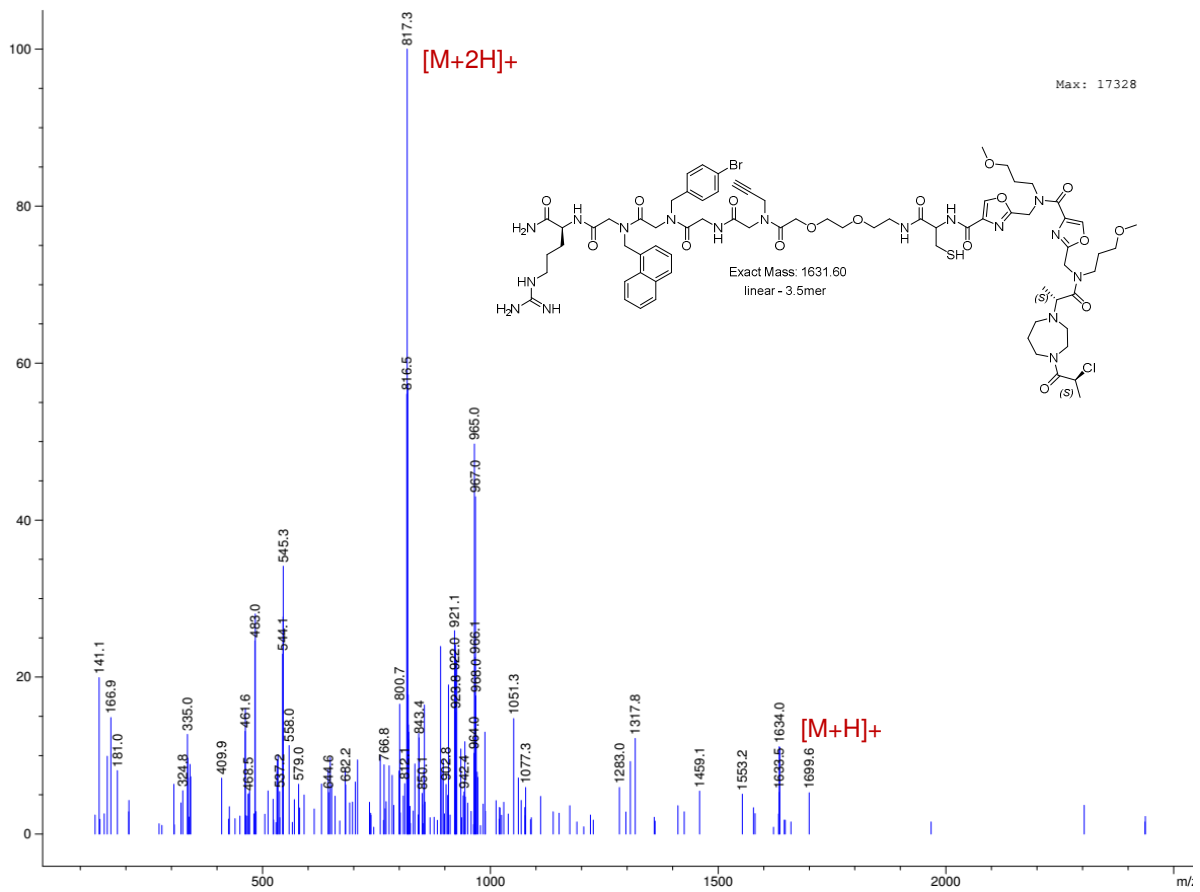

**N9-[DCB]:** Incomplete cyclization on both 10  $\mu\text{m}$  and 160  $\mu\text{m}$  beads, linear starting material was identified in small quantity (MW 1674, RT 8.376).

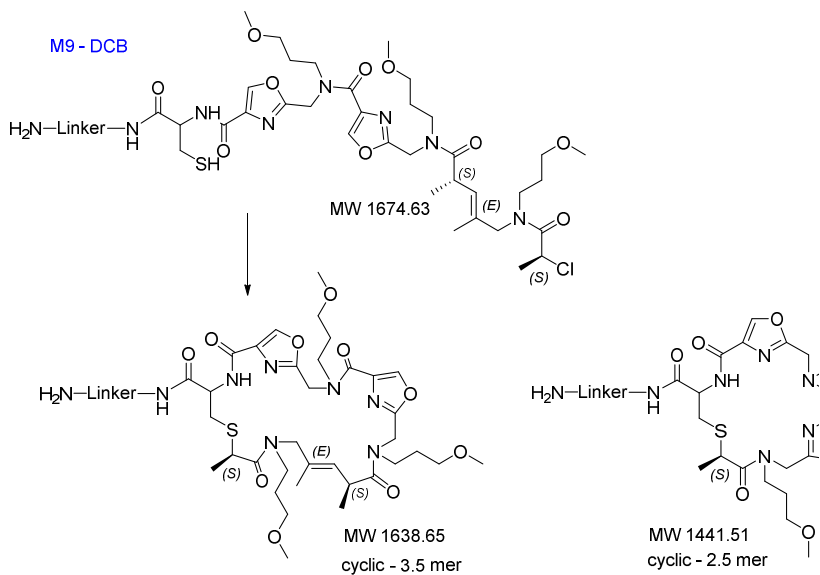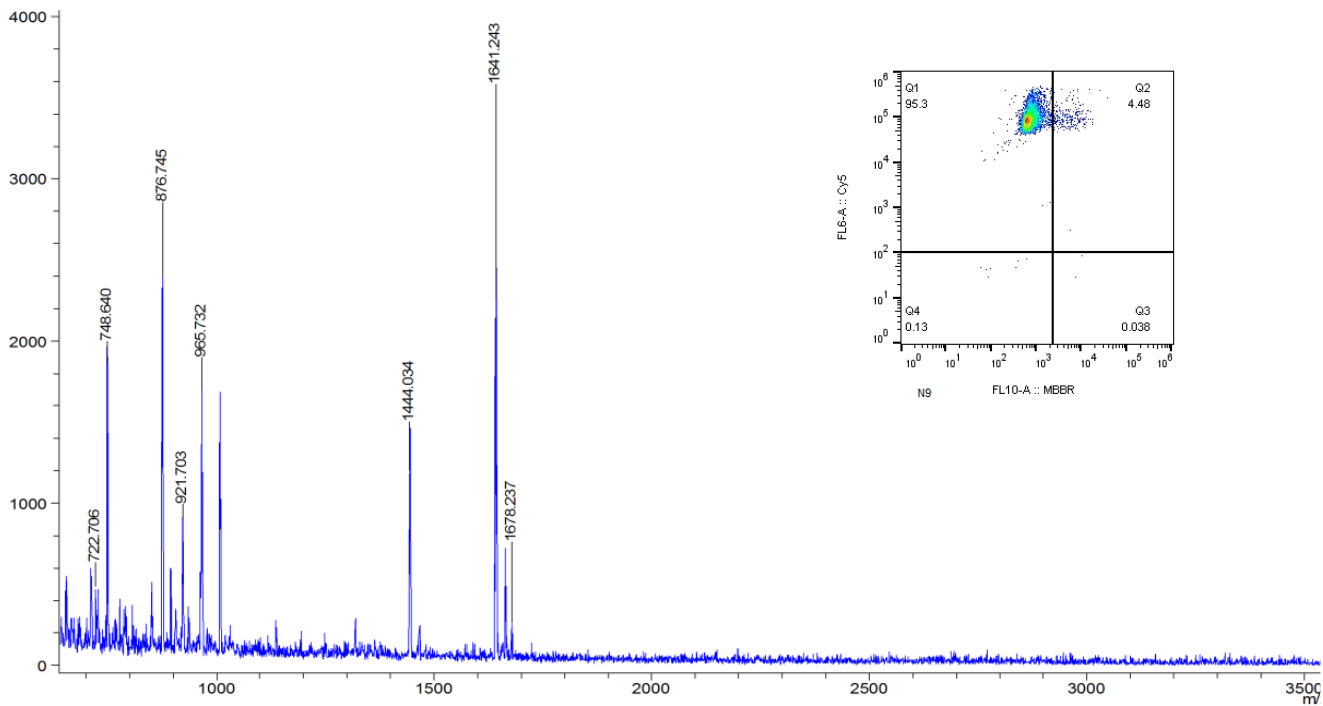



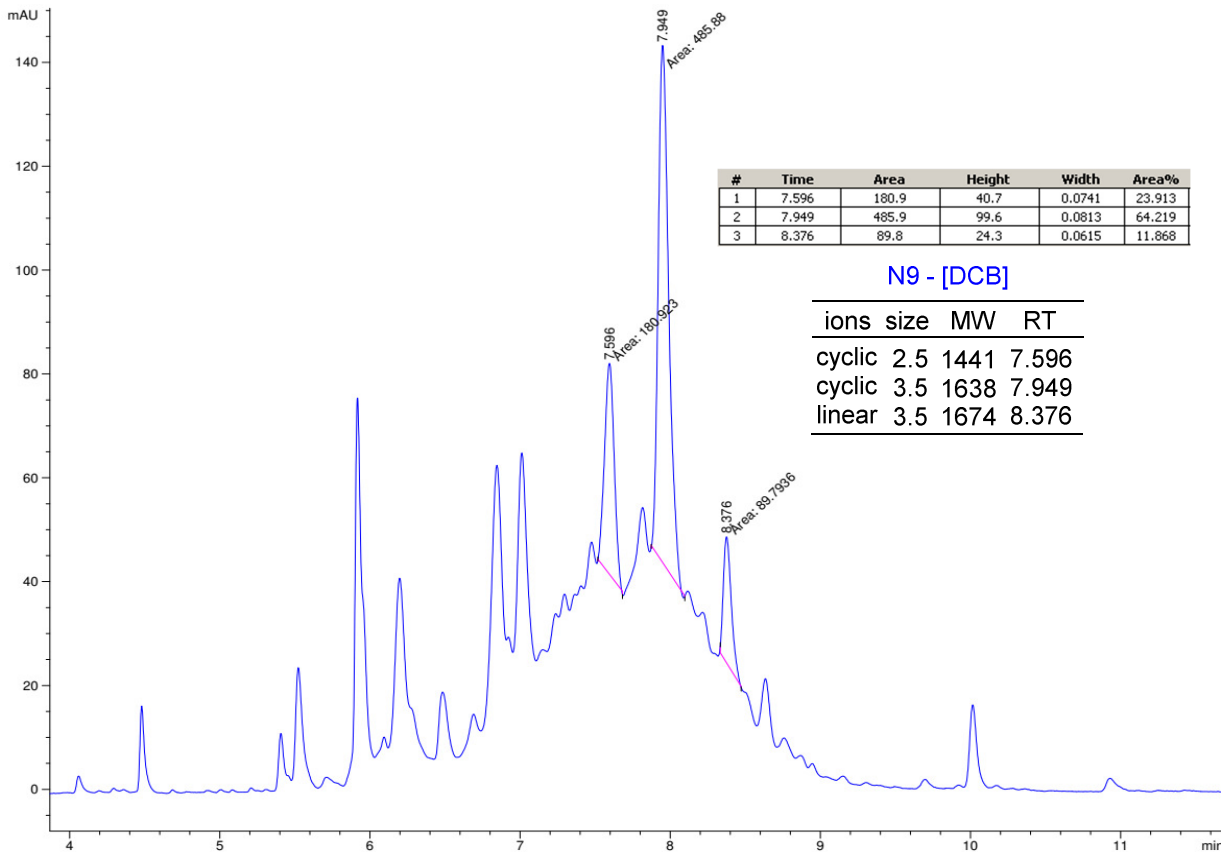

**N9 - [DCB]**

| ions size  | MW   | RT    |
|------------|------|-------|
| cyclic 2.5 | 1441 | 7.596 |
| cyclic 3.5 | 1638 | 7.949 |
| linear 3.5 | 1674 | 8.376 |

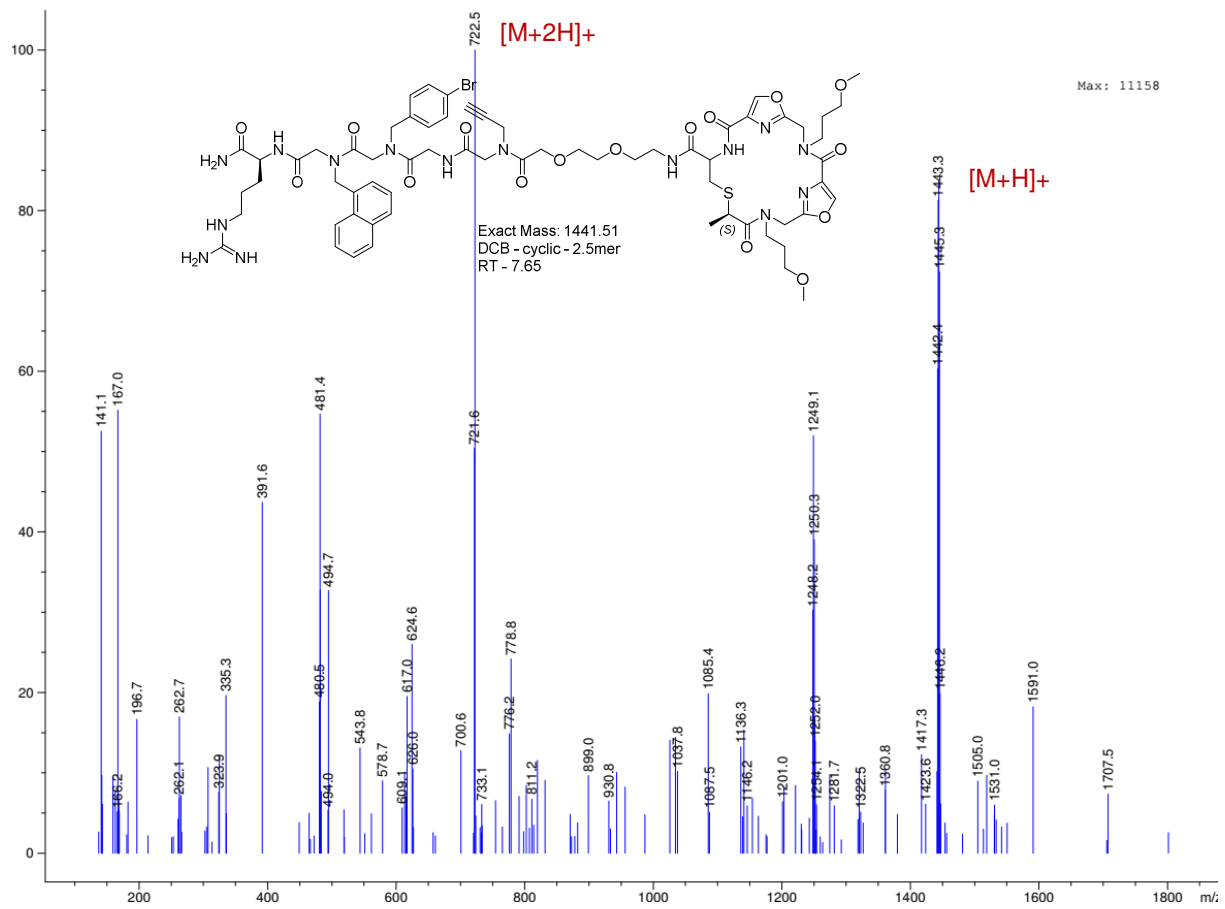



**N10-[DDB]:** Cyclization was complete on both 10  $\mu\text{m}$  & 160  $\mu\text{m}$  beads.

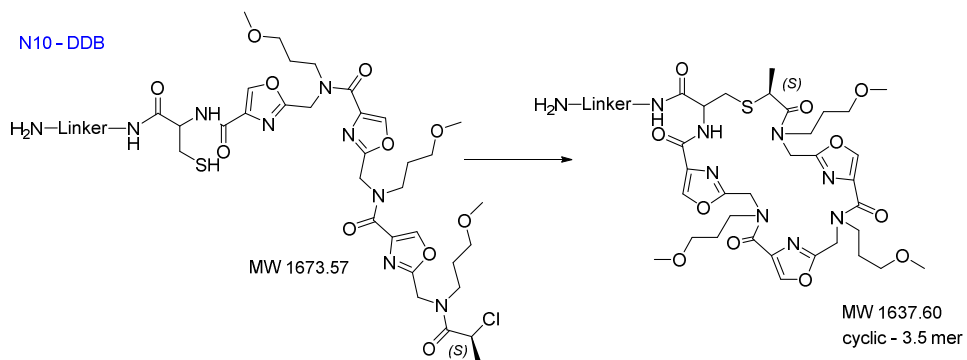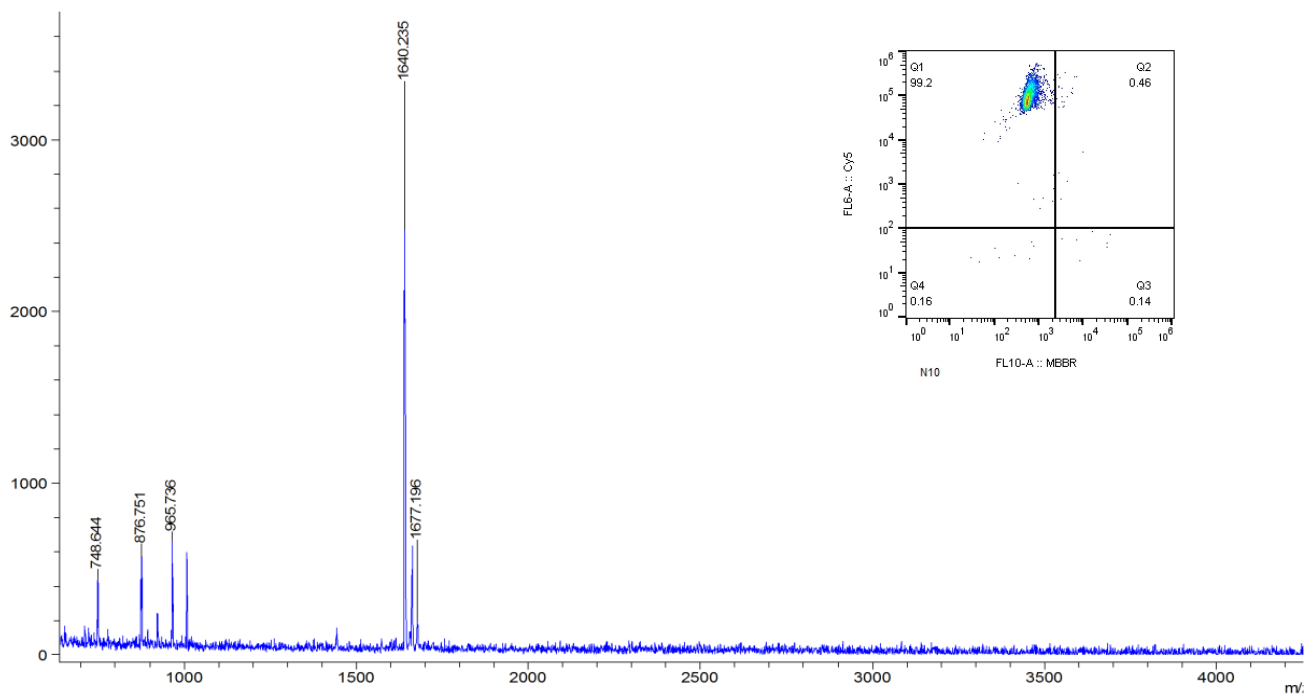

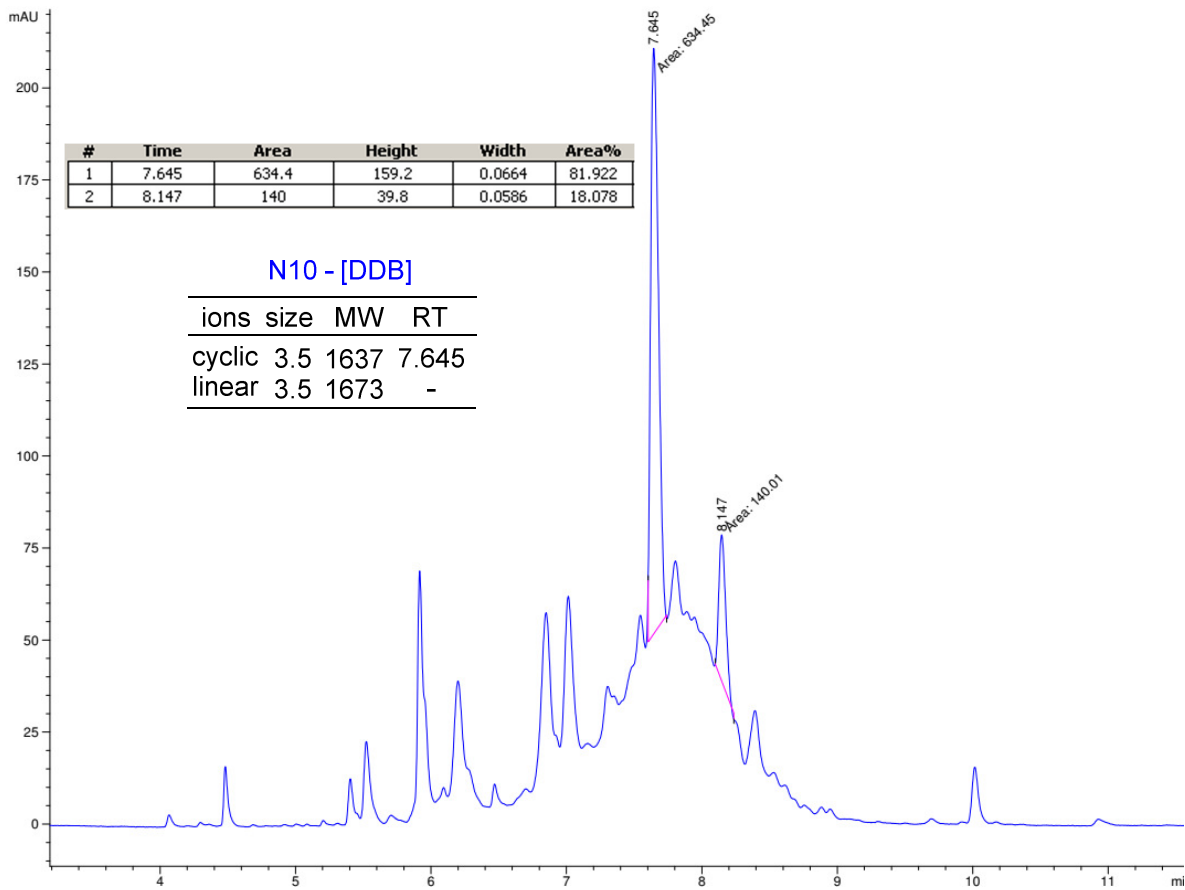

**N10 - [DDB]**

|        | ions size | MW   | RT    |
|--------|-----------|------|-------|
| cyclic | 3.5       | 1637 | 7.645 |
| linear | 3.5       | 1673 | -     |

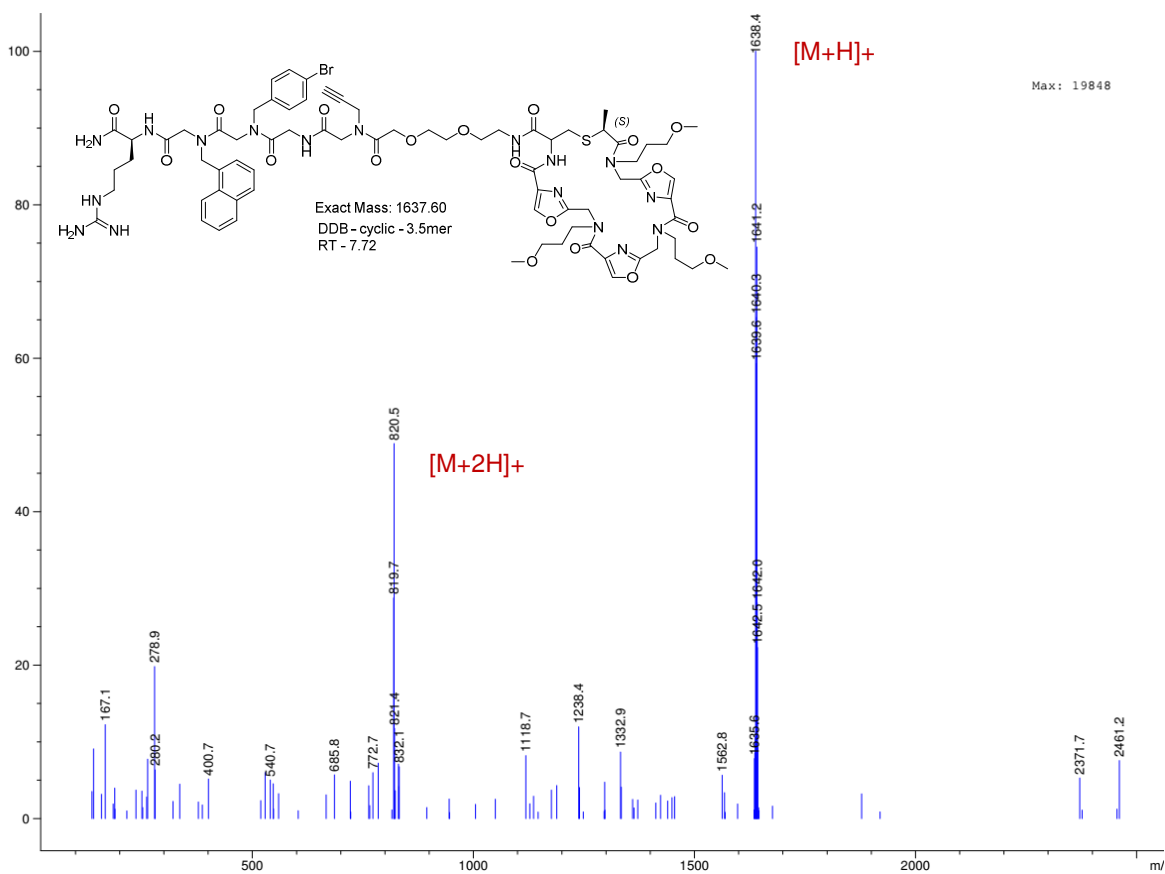

**O1-[AAD]:** Incomplete cyclization was detected on 10  $\mu\text{m}$  but was complete on 160  $\mu\text{m}$  beads.

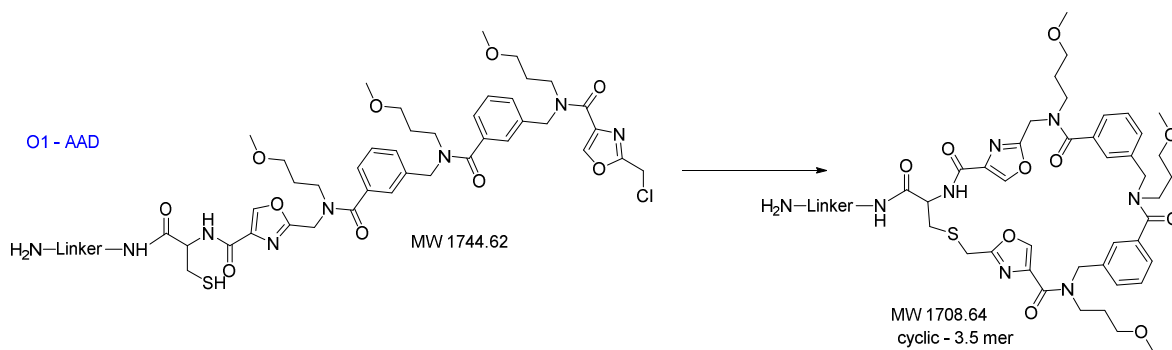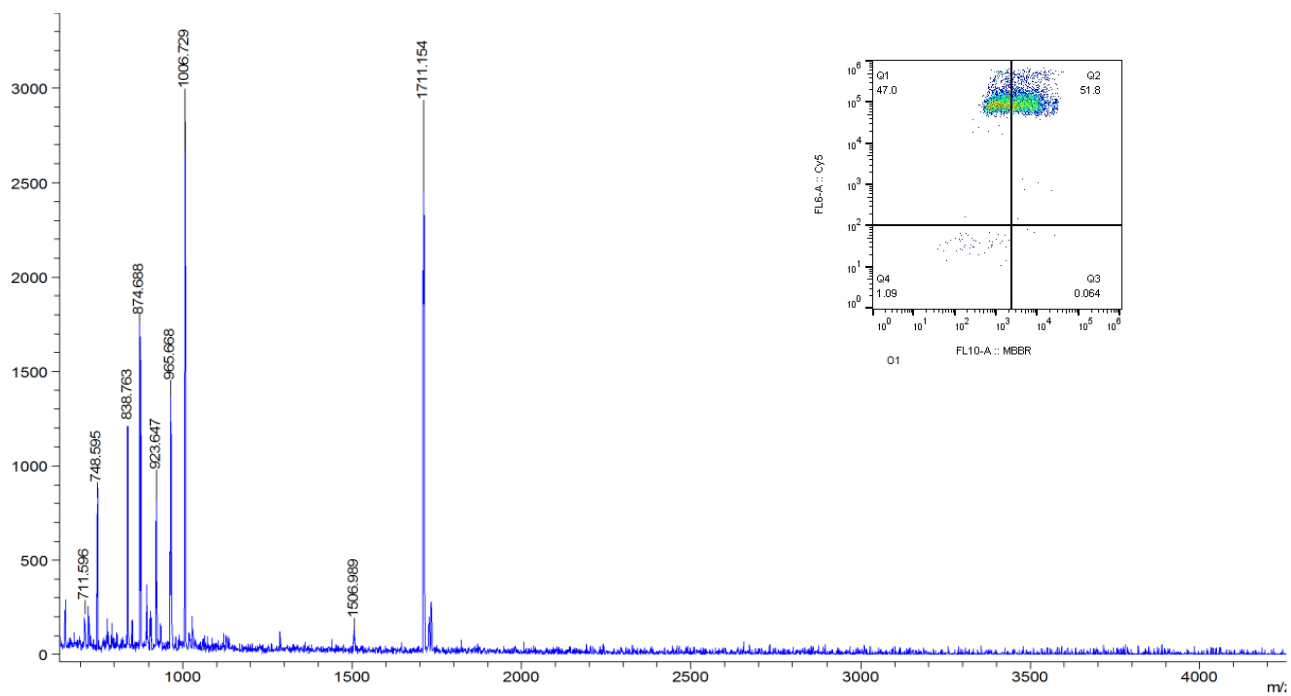

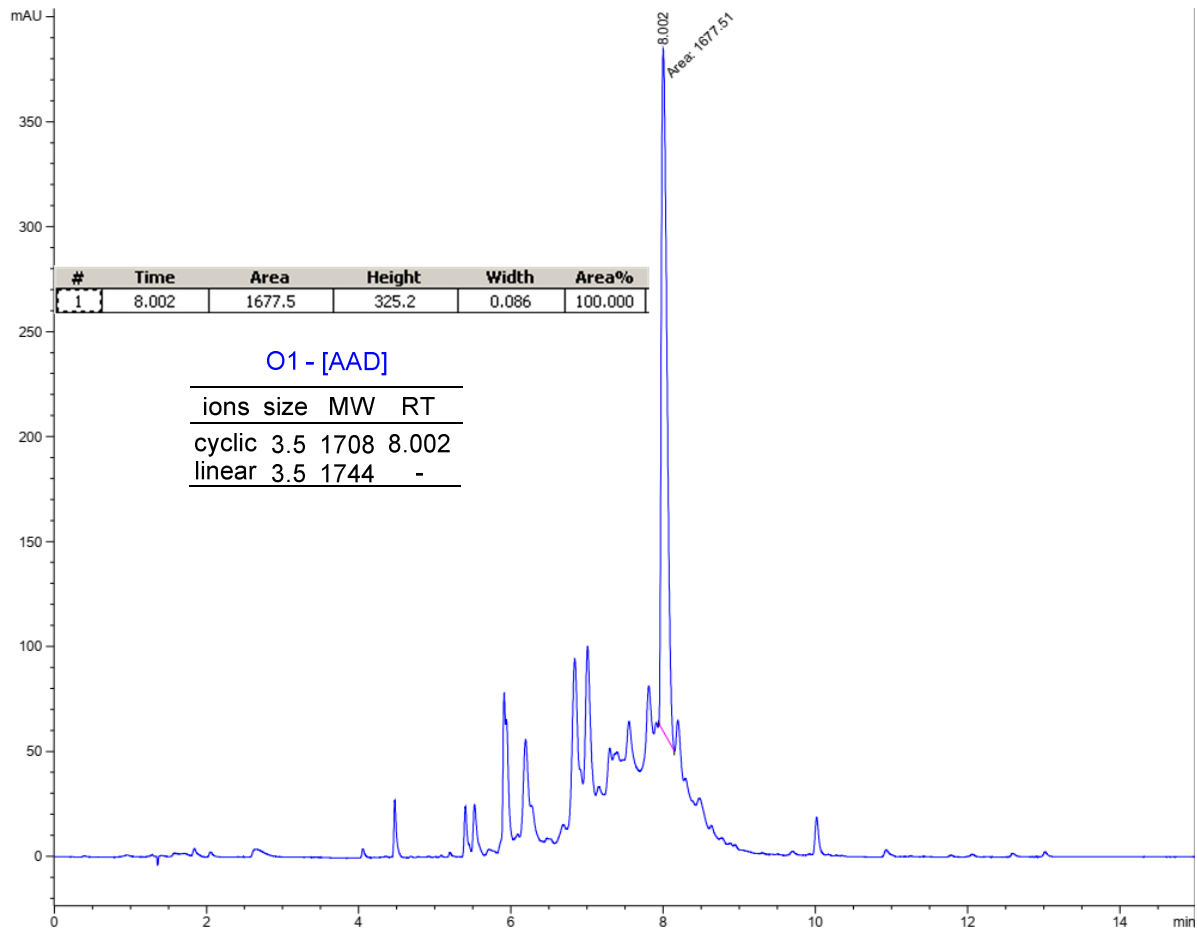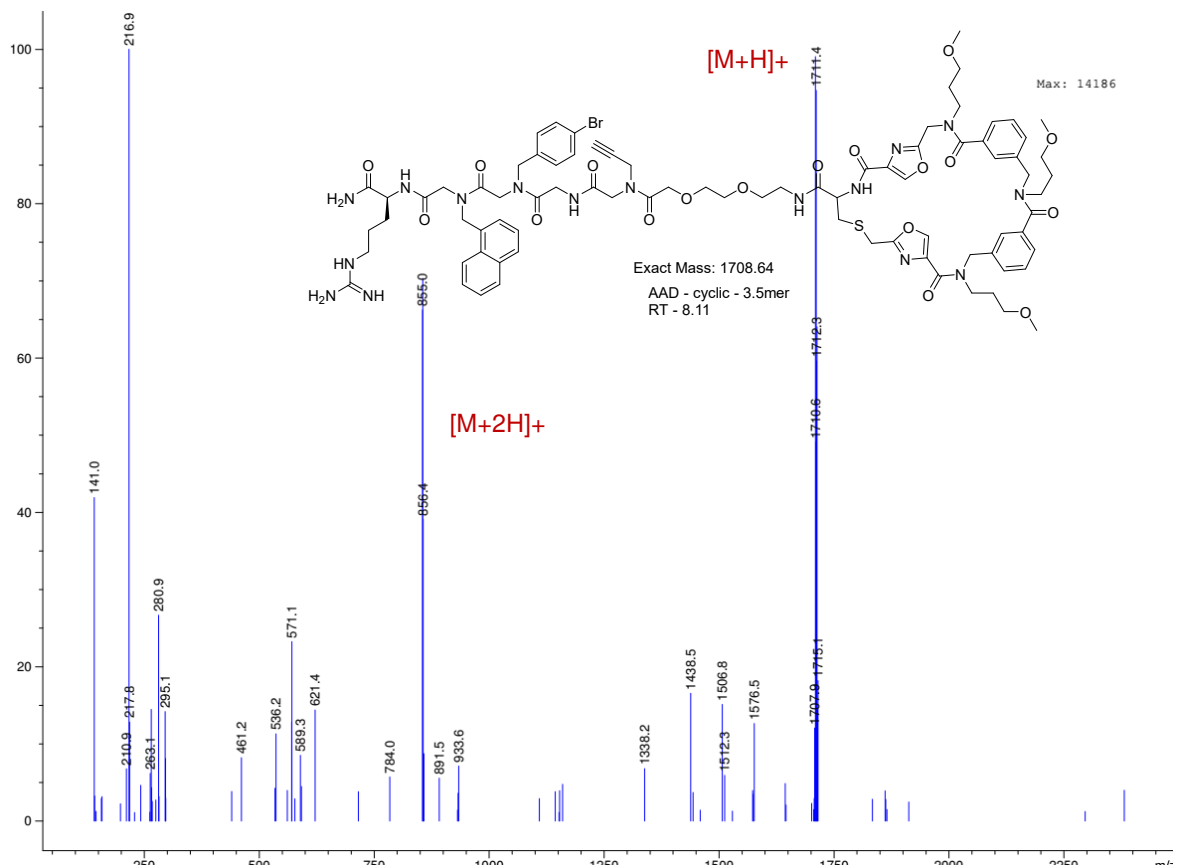

**O2-[ABD]:** Cyclization was complete on both 10  $\mu$ m & 160  $\mu$ m.

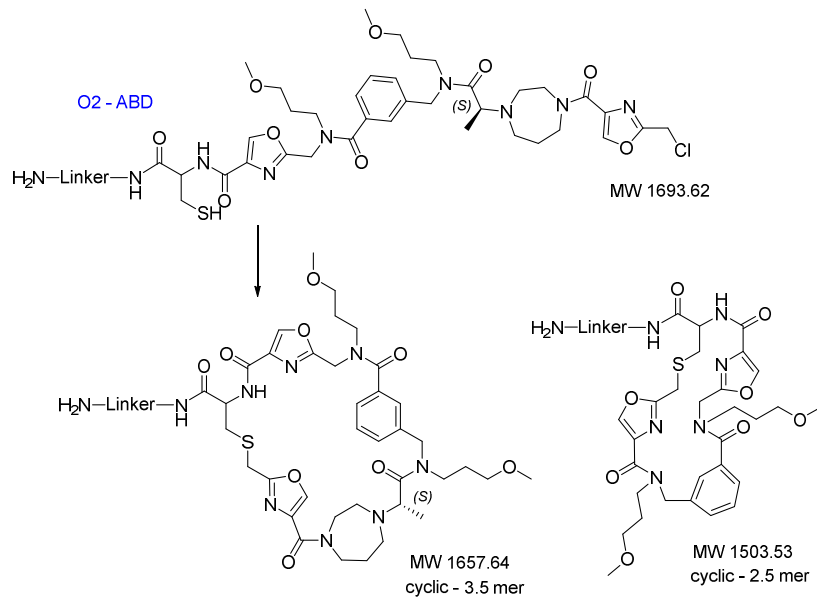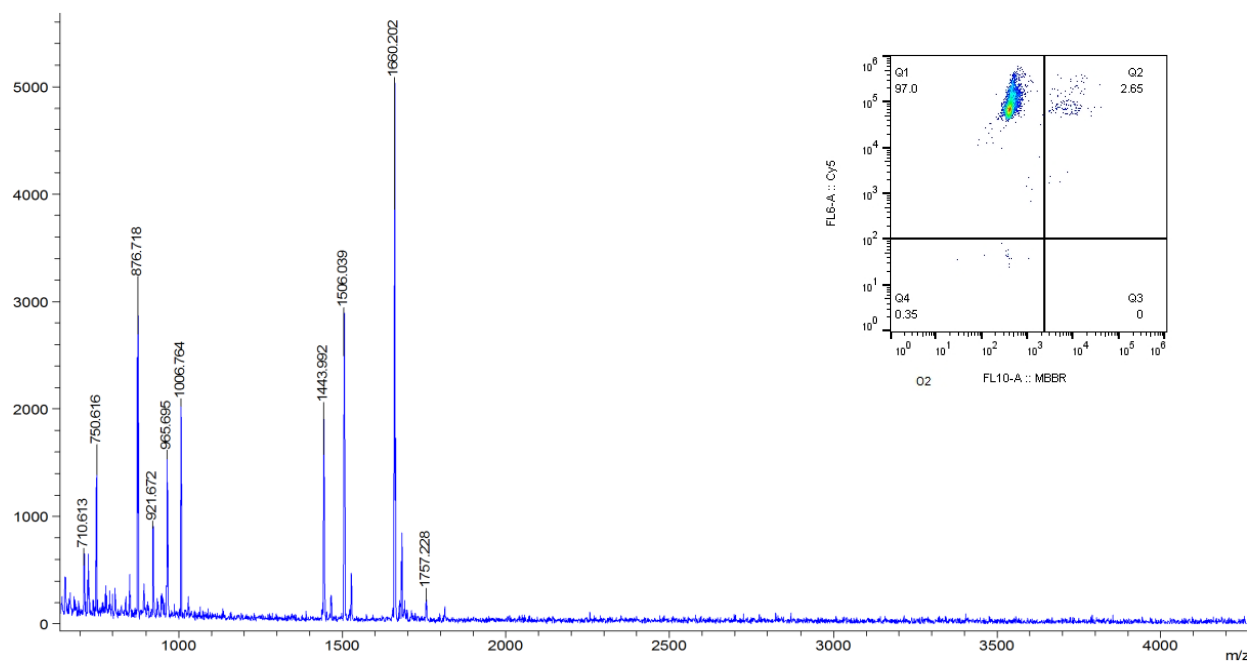

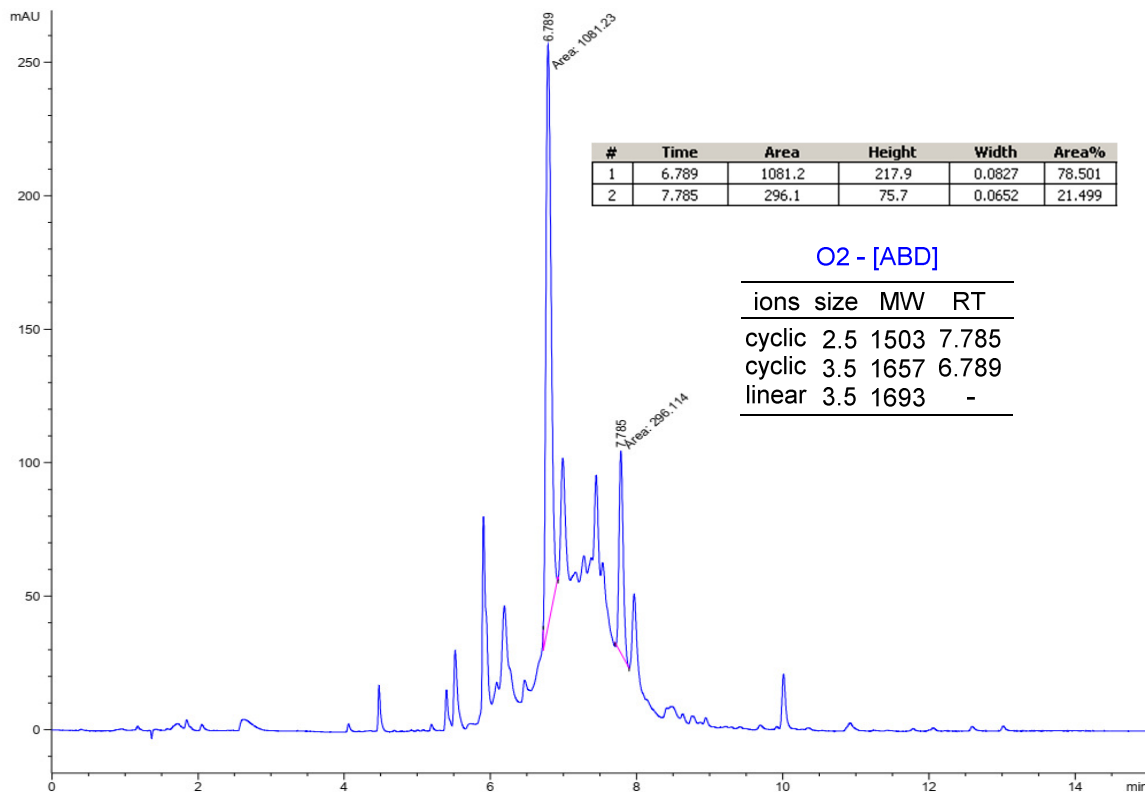

O2 - [ABD]

|        | ions size | MW   | RT    |
|--------|-----------|------|-------|
| cyclic | 2.5       | 1503 | 7.785 |
| cyclic | 3.5       | 1657 | 6.789 |
| linear | 3.5       | 1693 | -     |

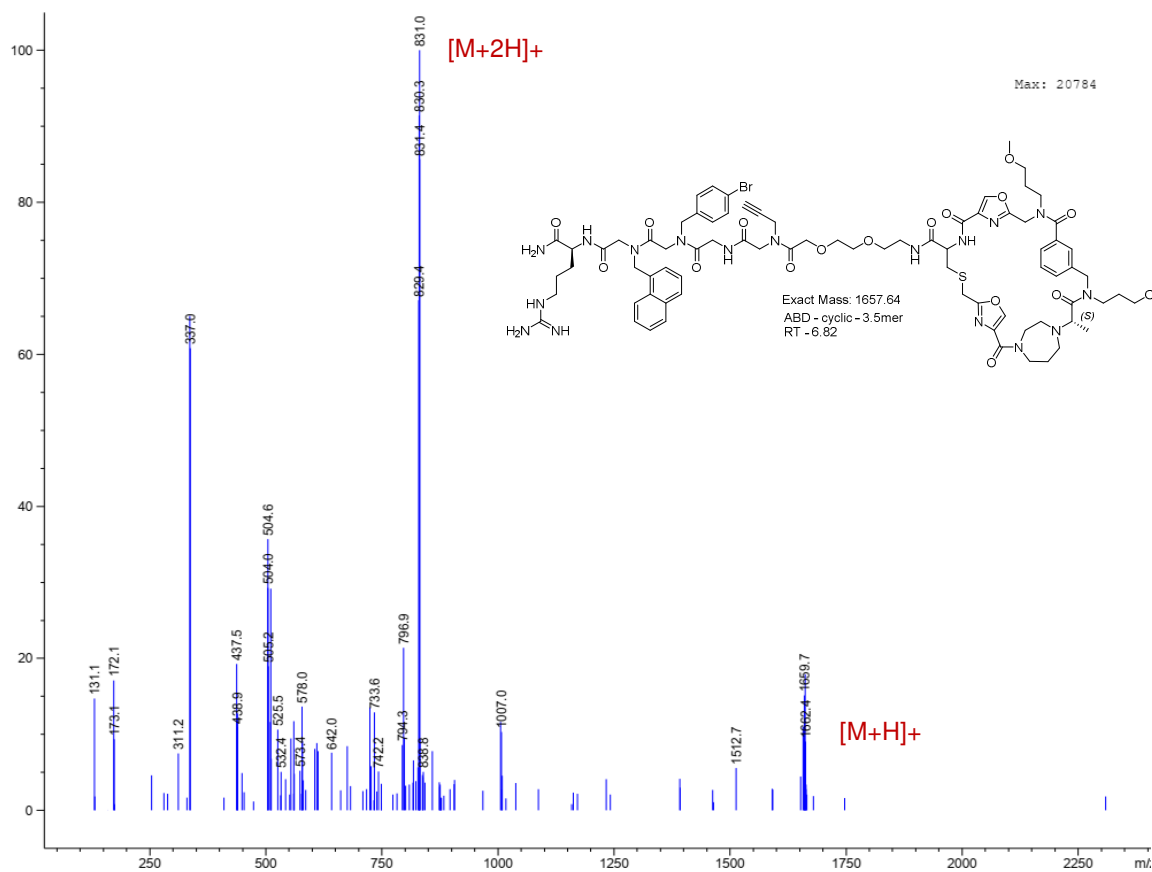



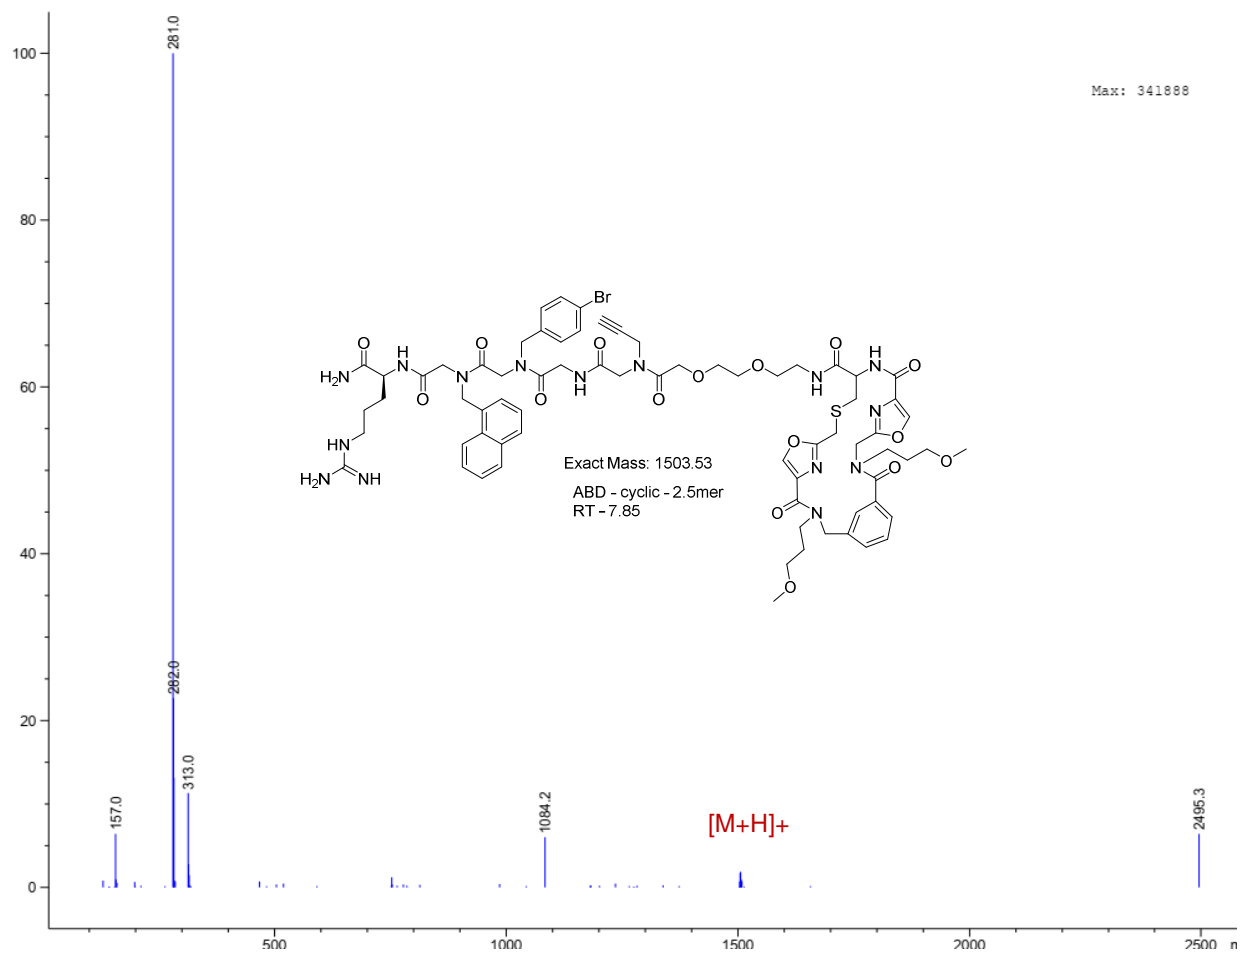

**O3-[ACD]:** Incomplete cyclization was detected on 10  $\mu\text{m}$  but was complete on 160  $\mu\text{m}$  beads.

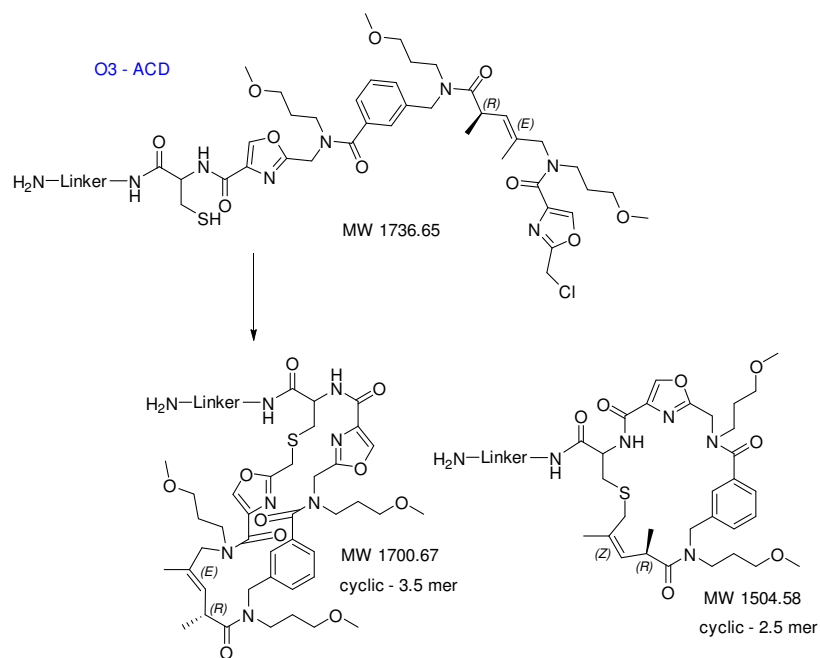

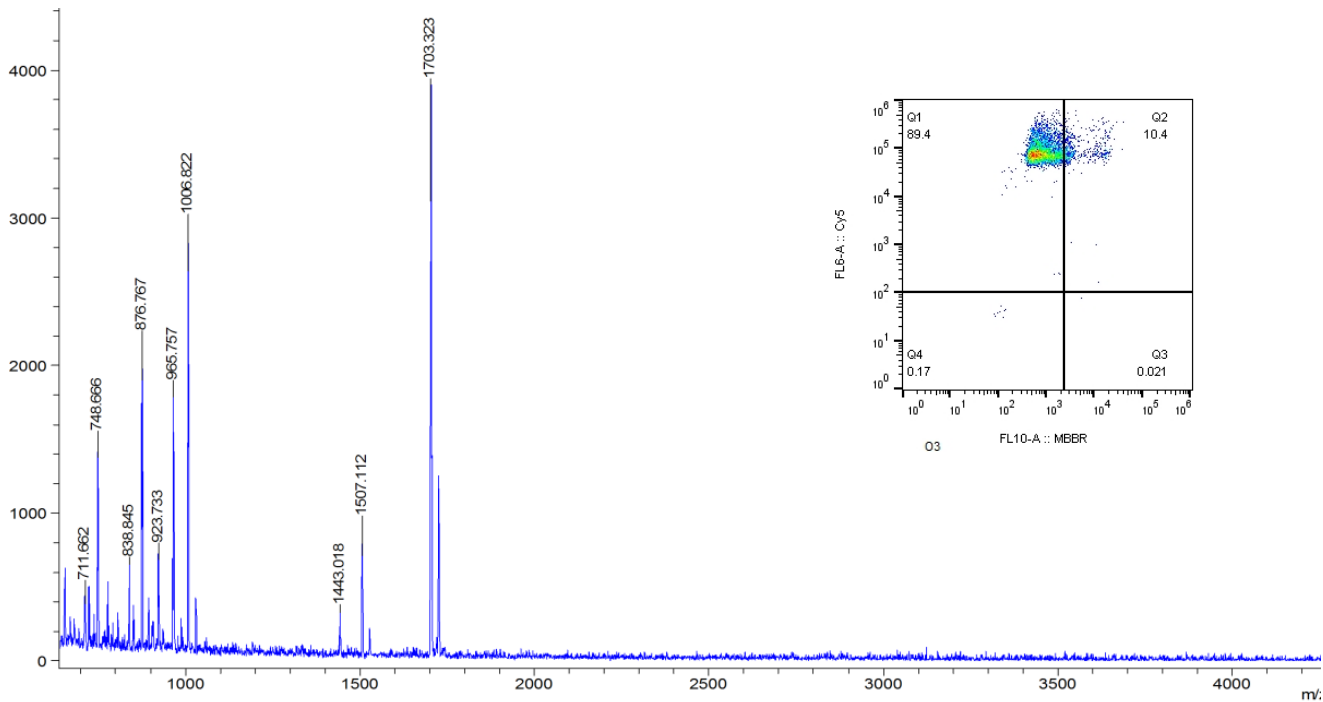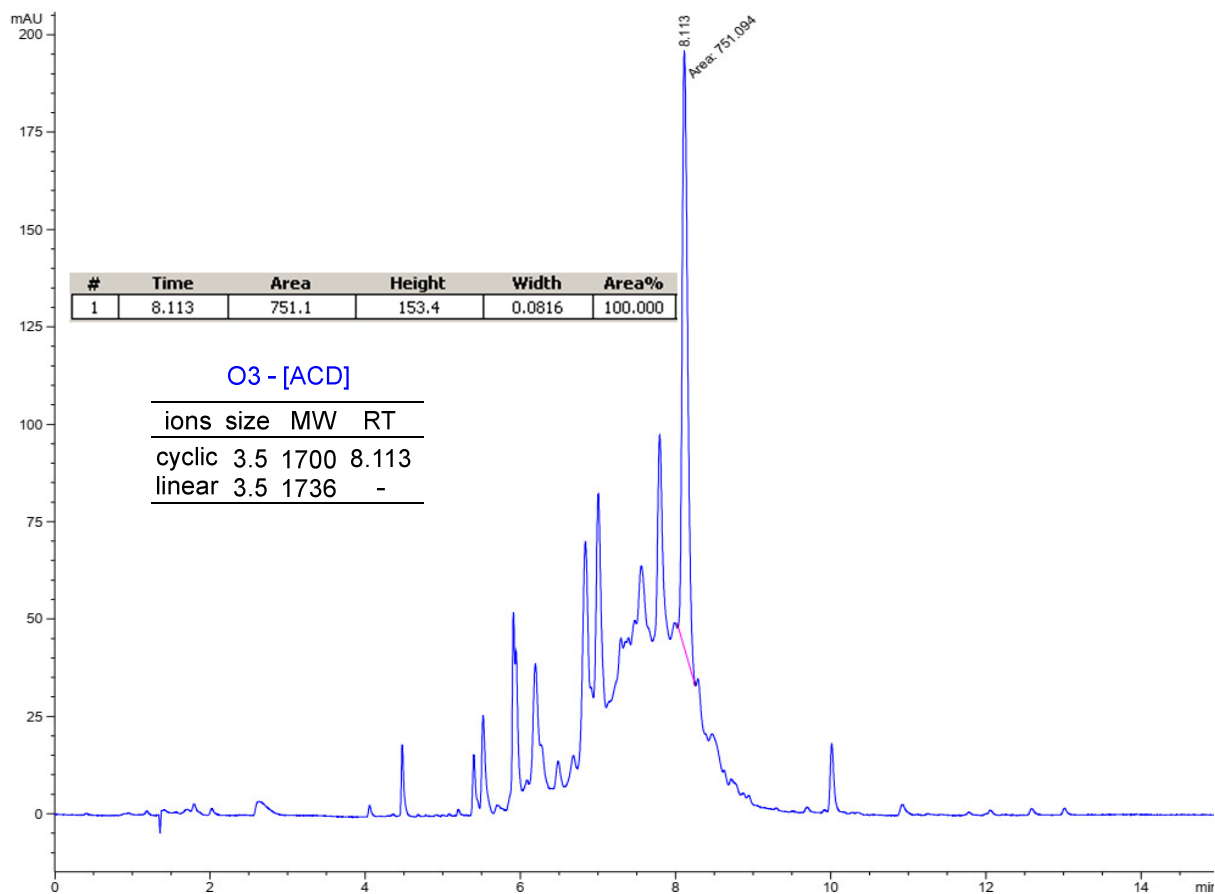

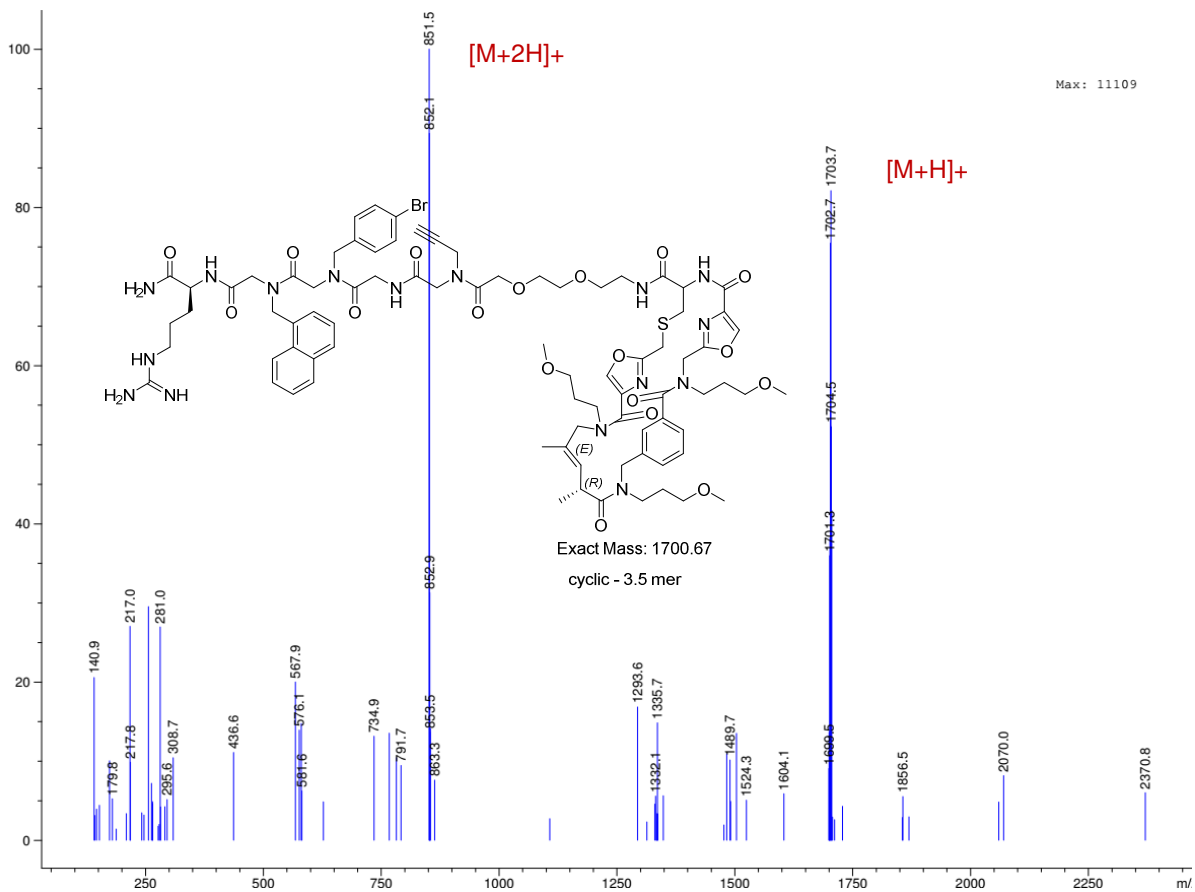

**O4-[ADD]:** Cyclization was complete on both 10  $\mu\text{m}$  & 160  $\mu\text{m}$  beads.

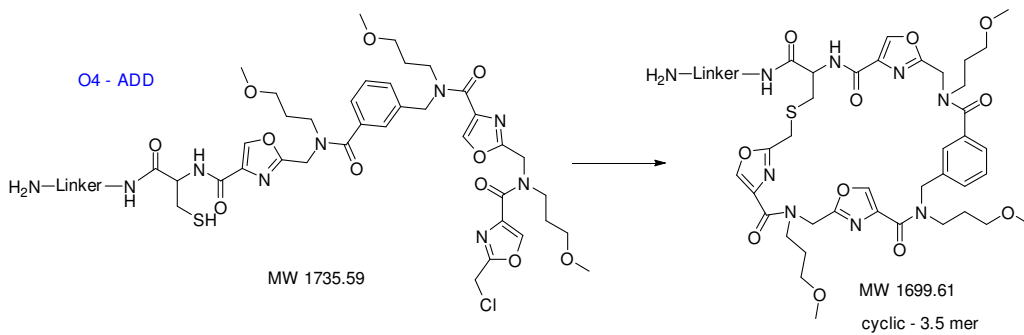

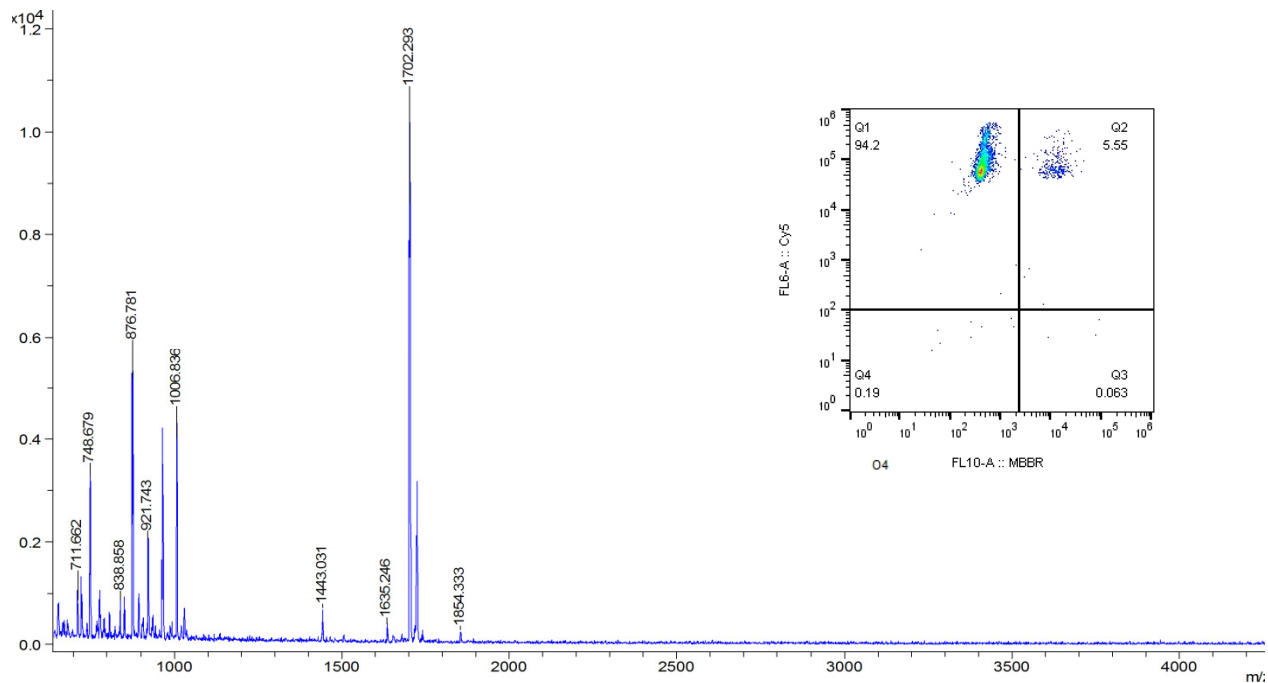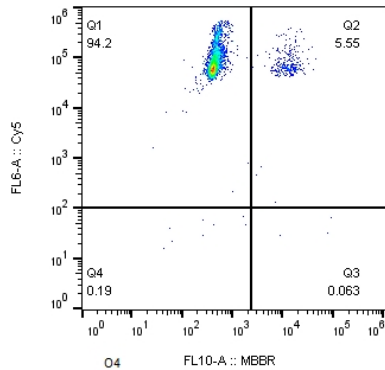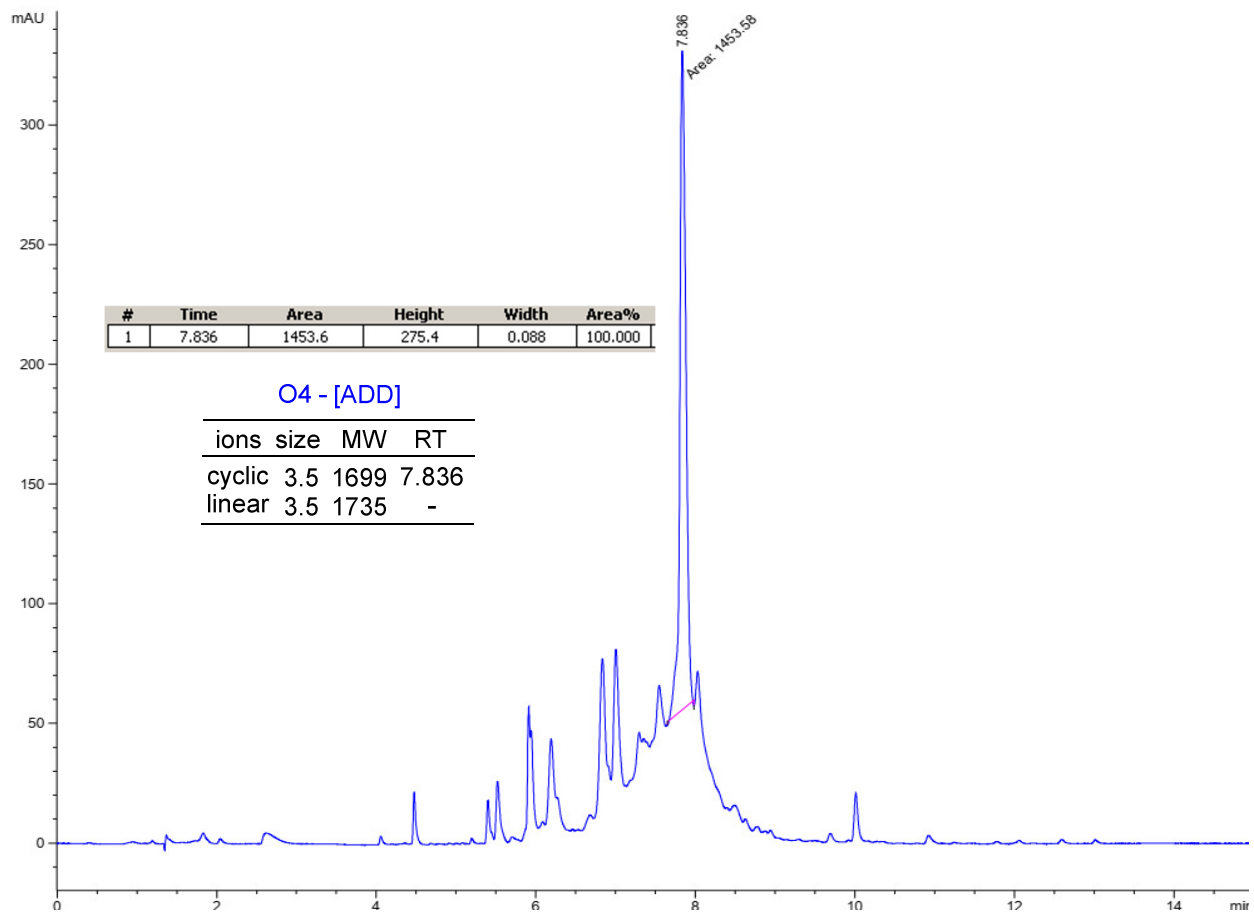

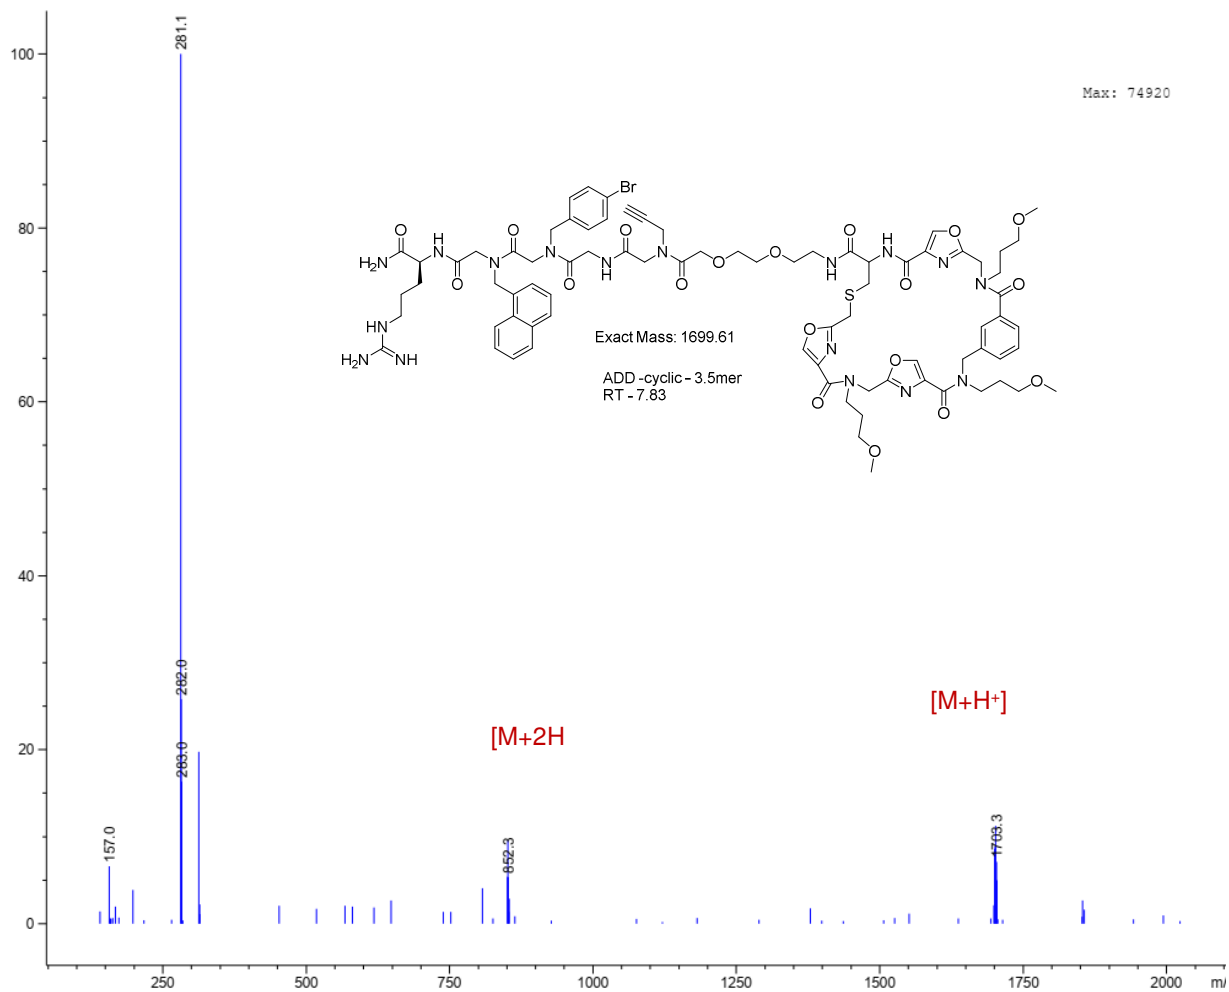

**O7-[AAC]:** Cyclization was complete on both 10  $\mu\text{m}$  & 160  $\mu\text{m}$  beads.

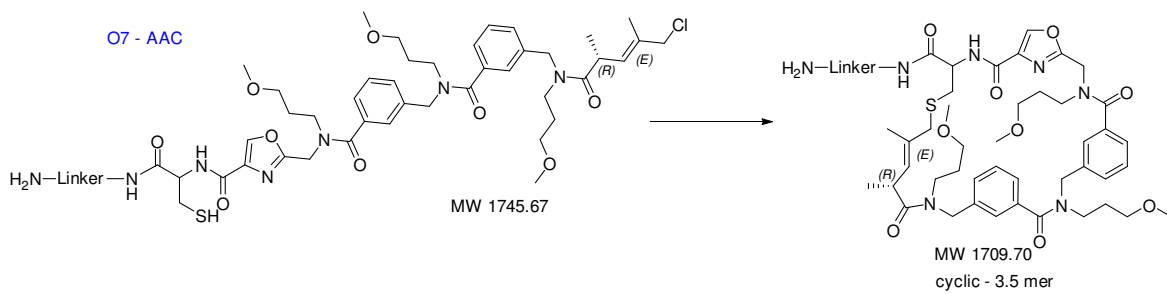

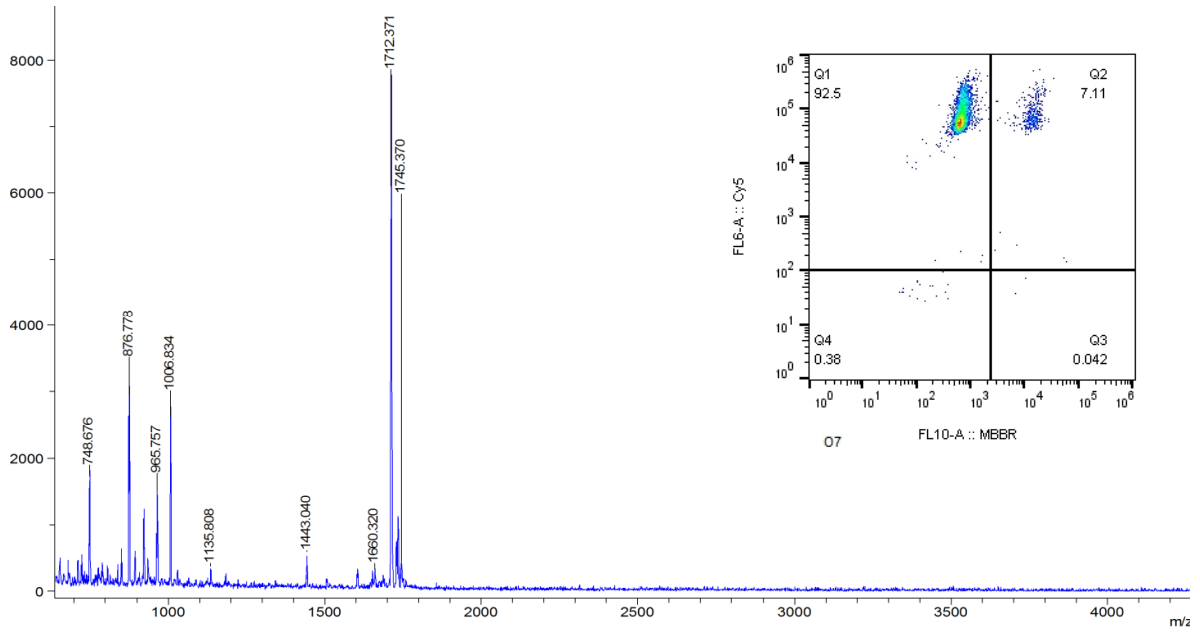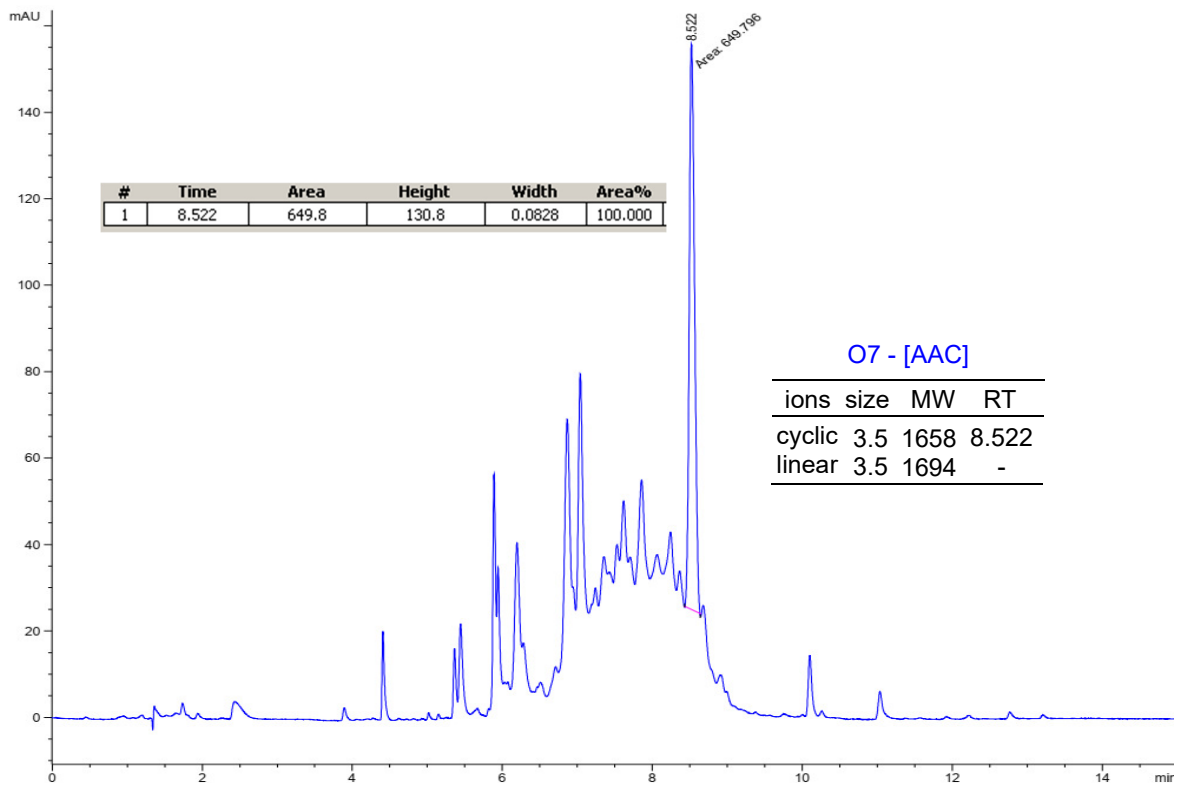

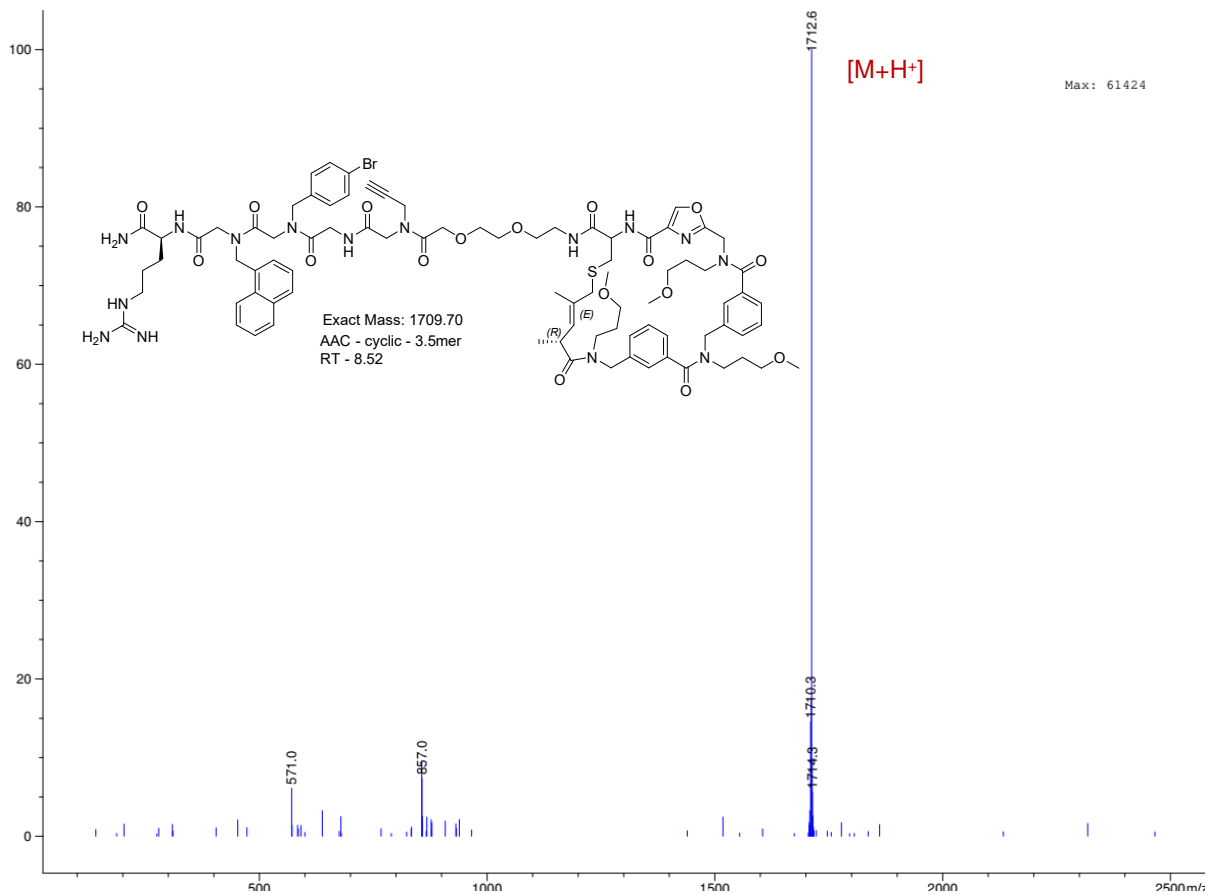

**O8-[ABC]:** Cyclization was complete on both 10  $\mu\text{m}$  & 160  $\mu\text{m}$  beads.

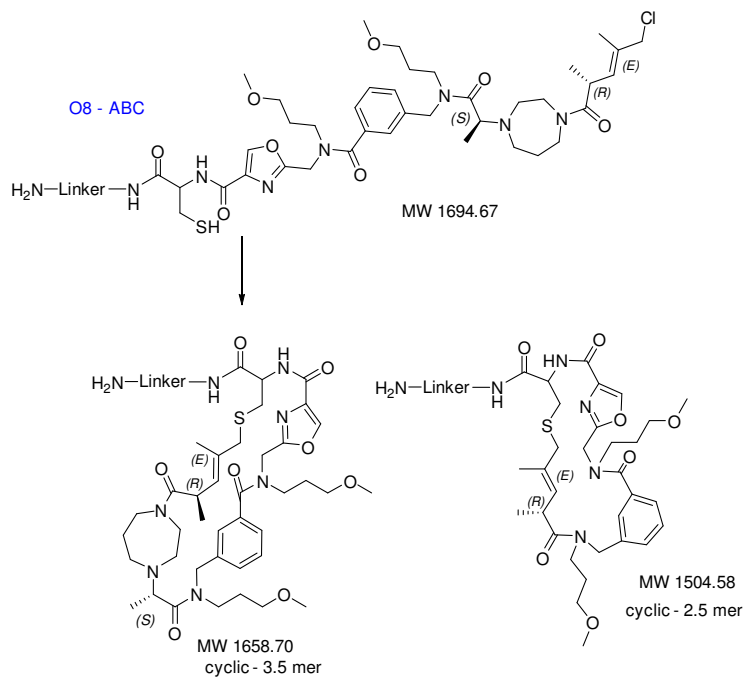

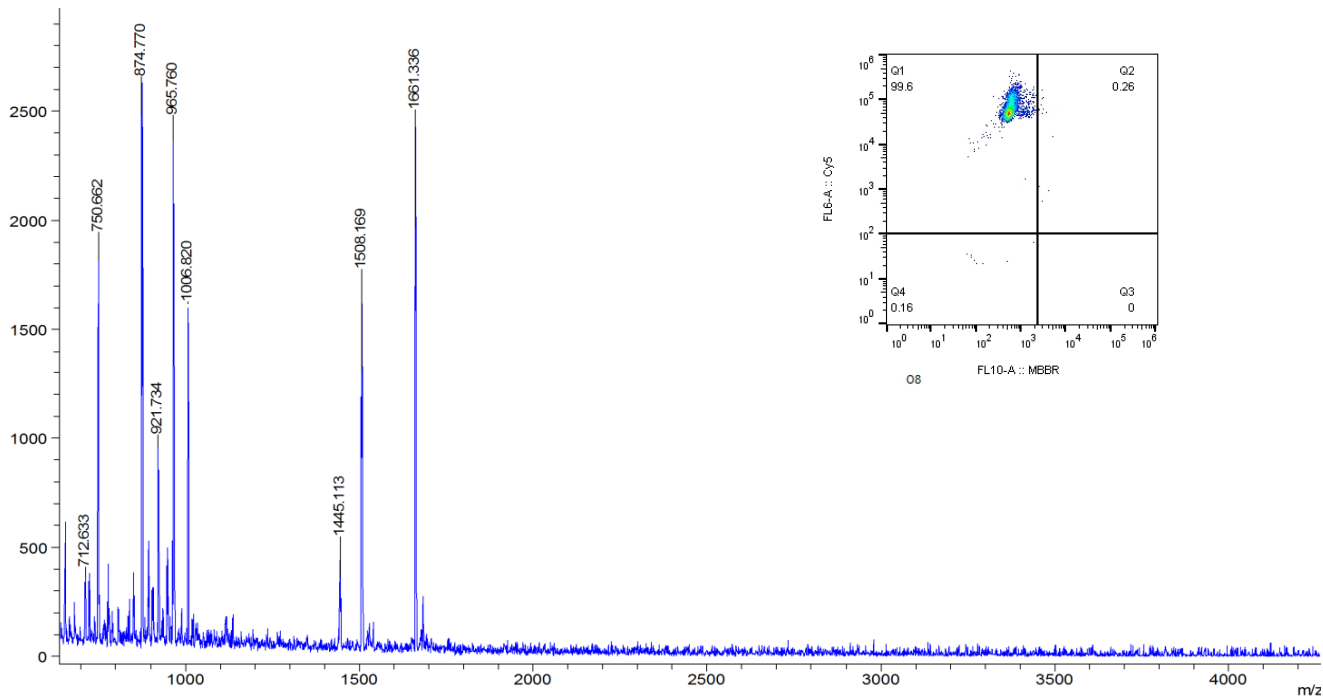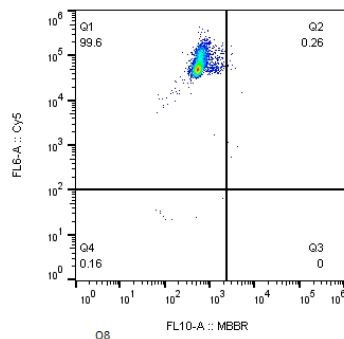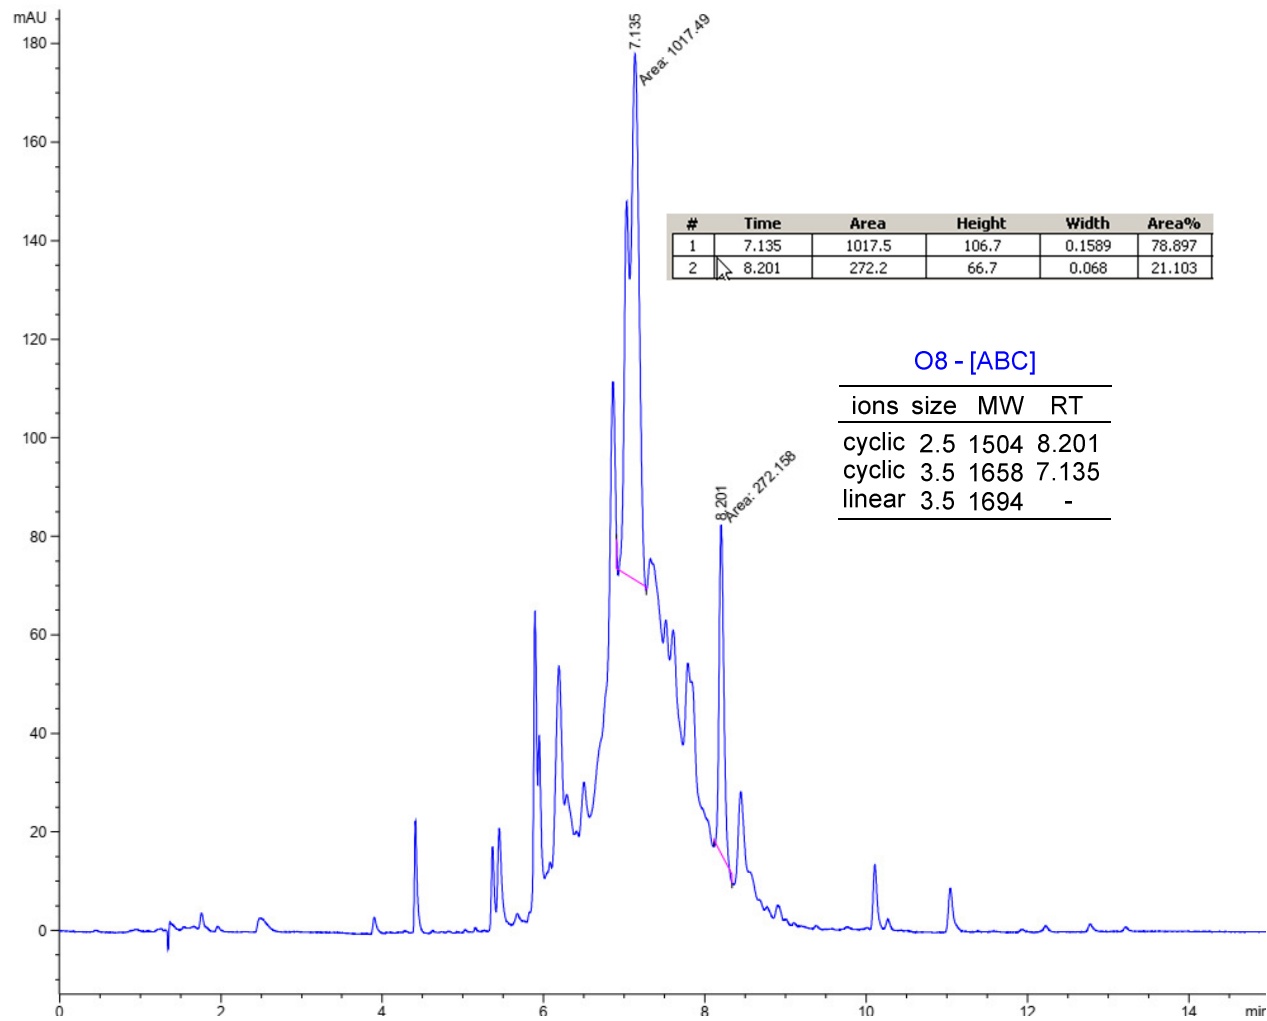



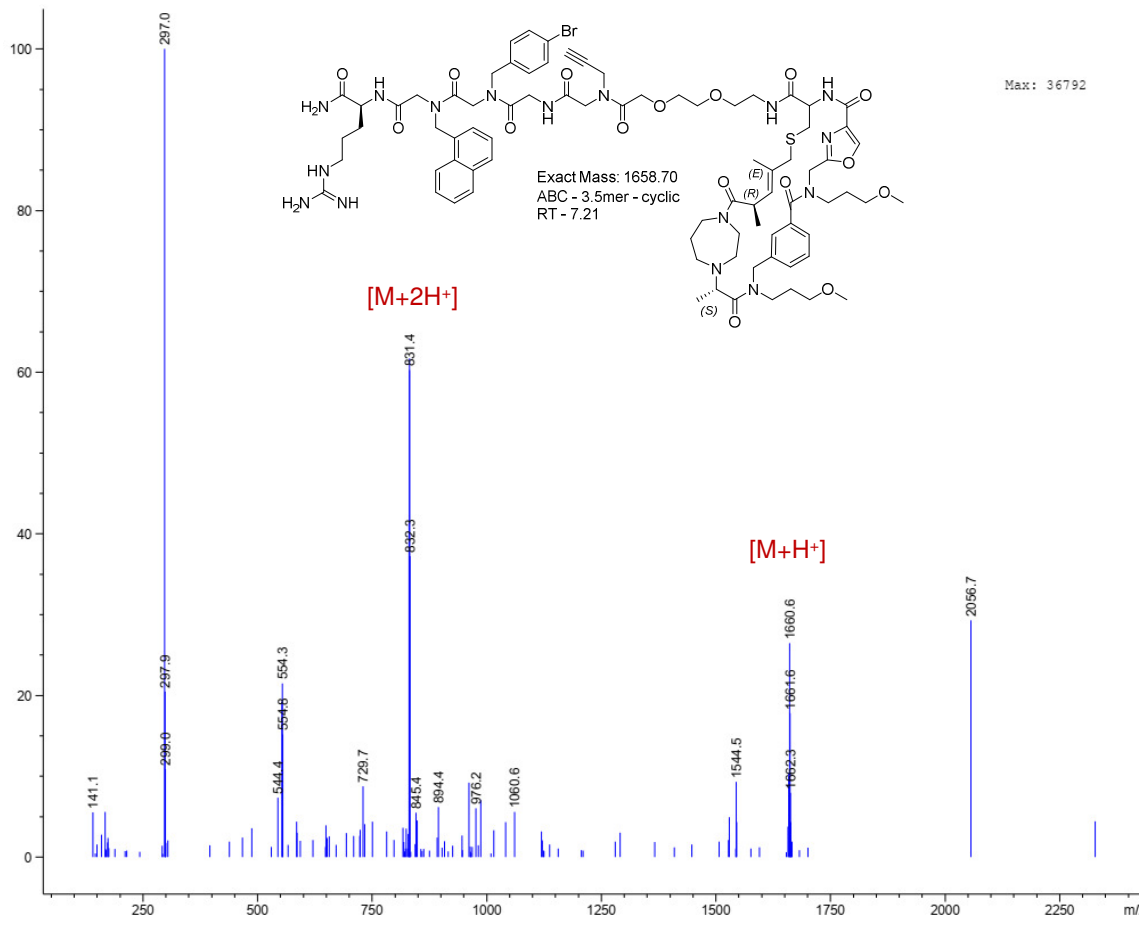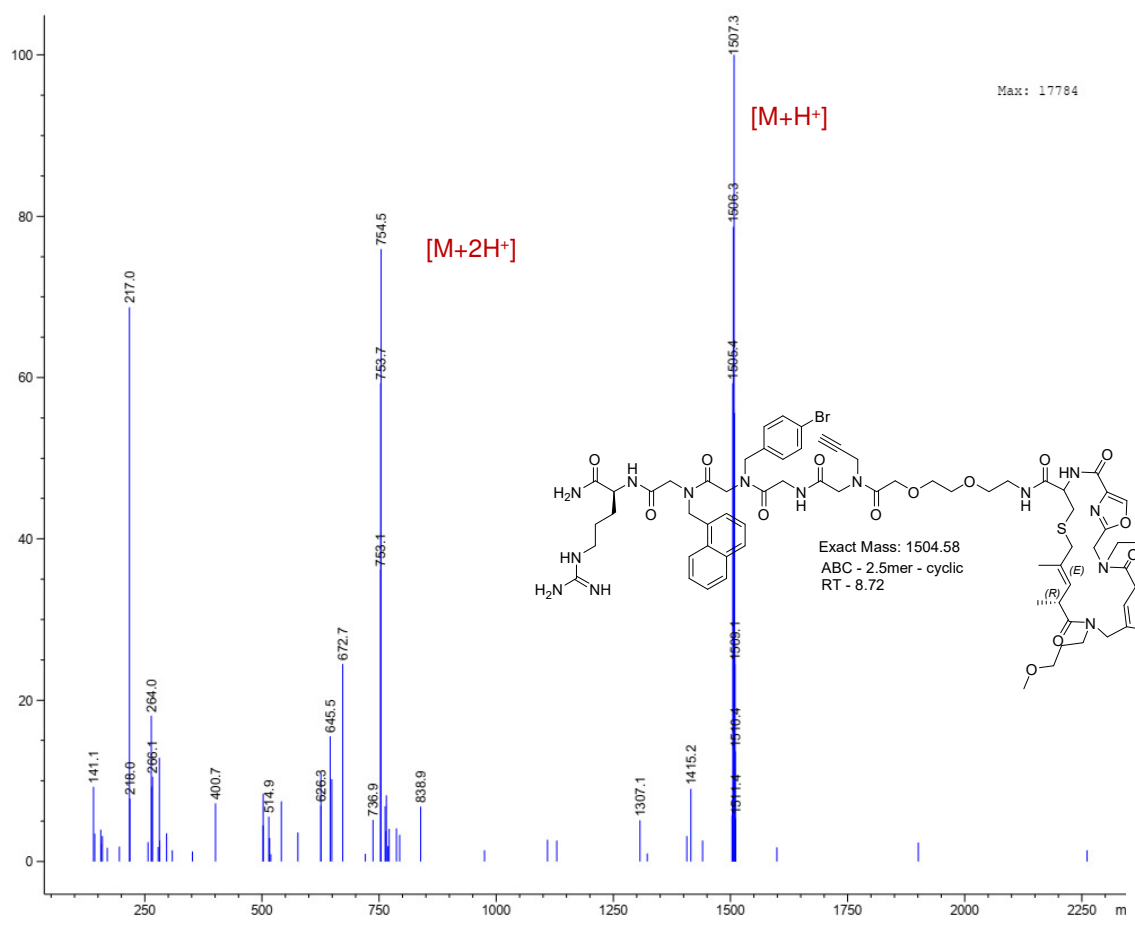

**O9-[ACC]:** Cyclization was complete on both 10  $\mu\text{m}$  & 160  $\mu\text{m}$  beads.

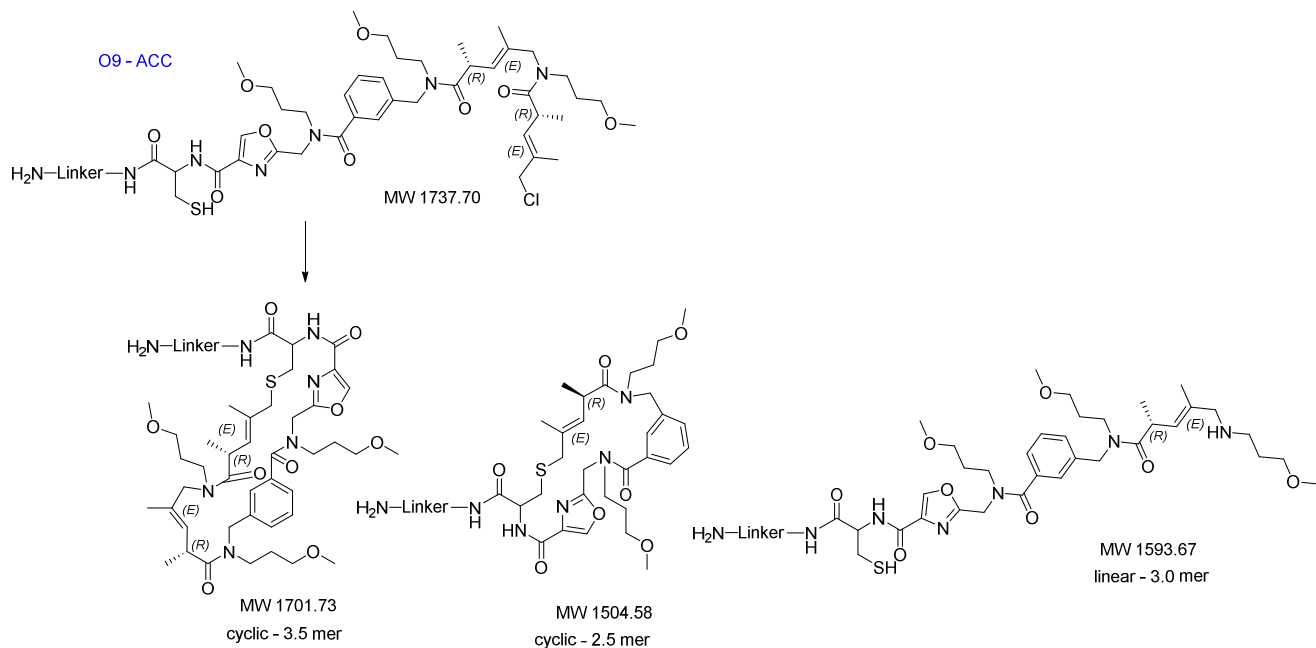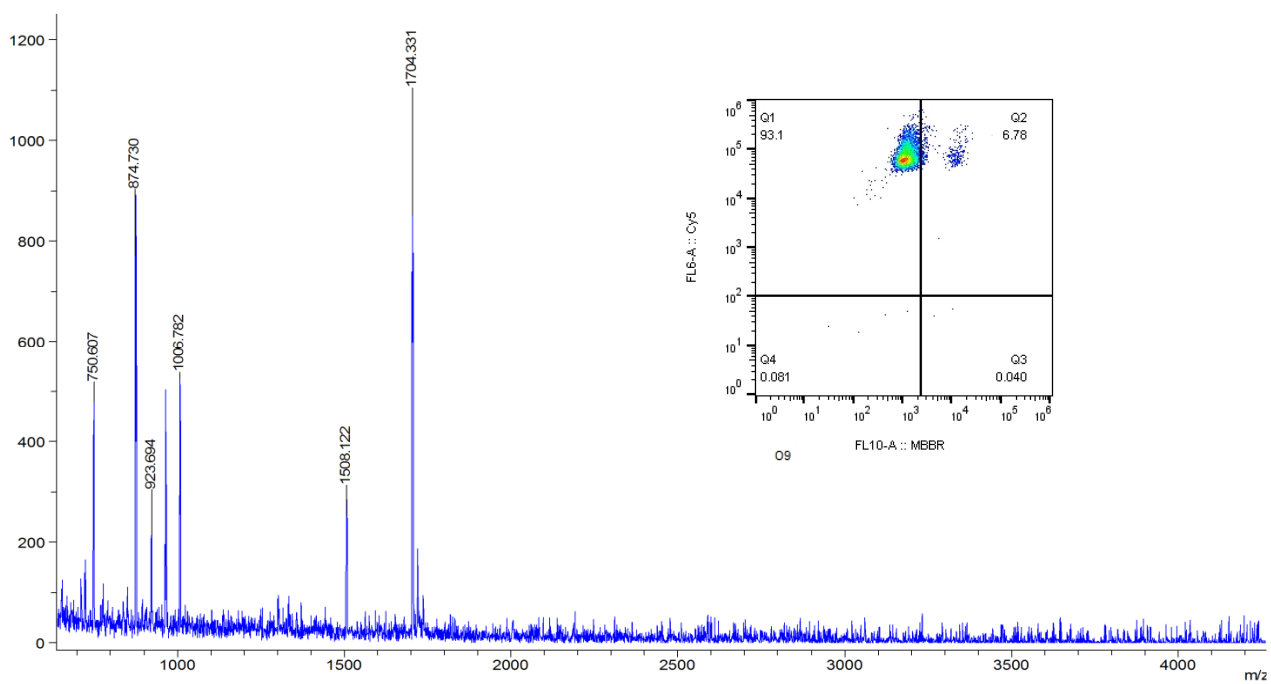

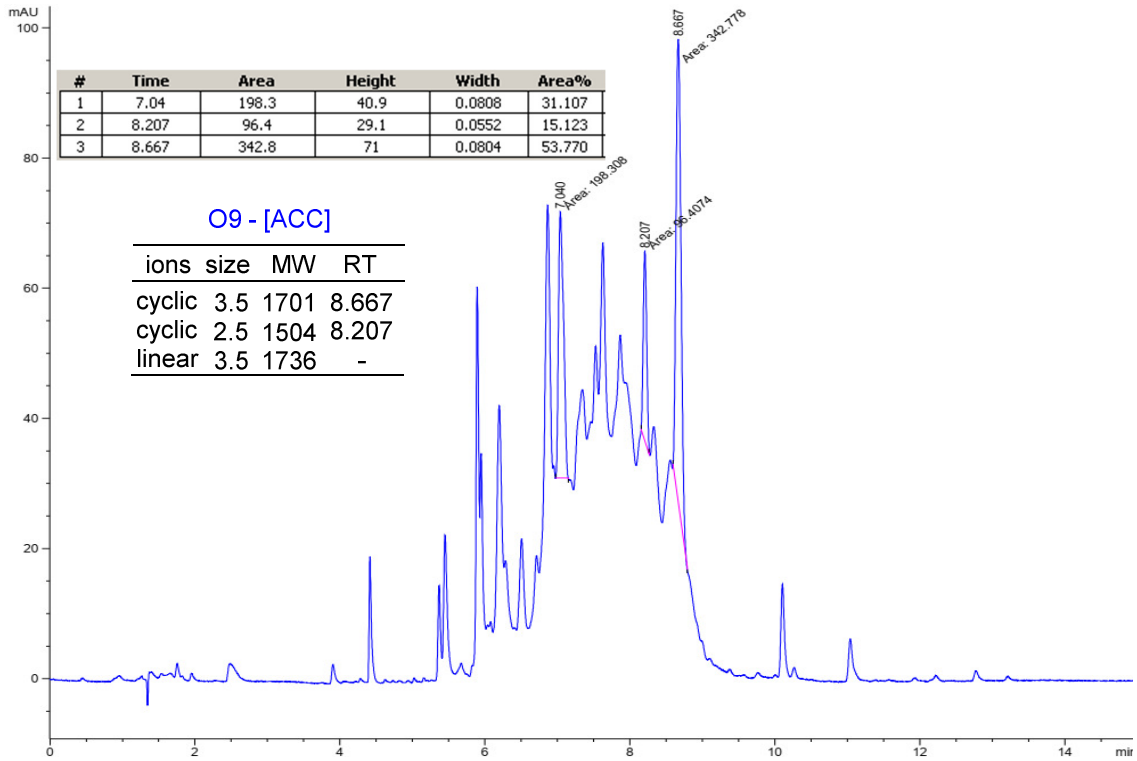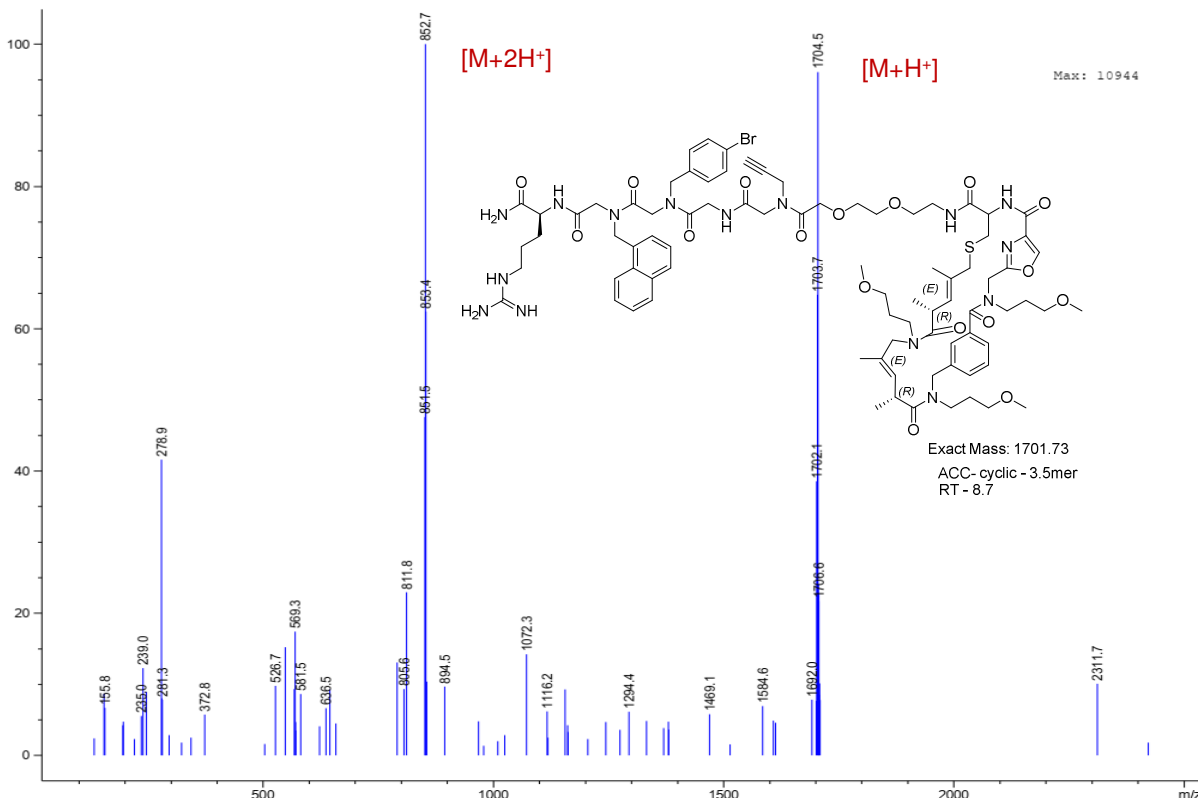

**O10-[ADC]:** Incomplete cyclization was detected on 10  $\mu\text{m}$  but was completed on 160  $\mu\text{m}$  beads.

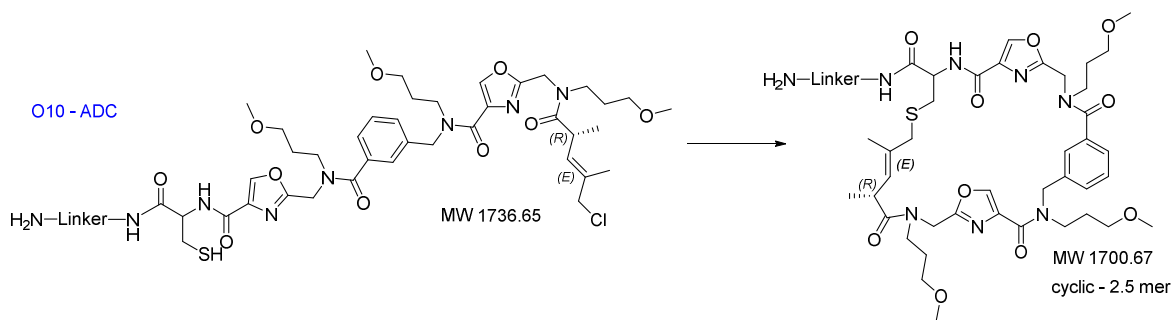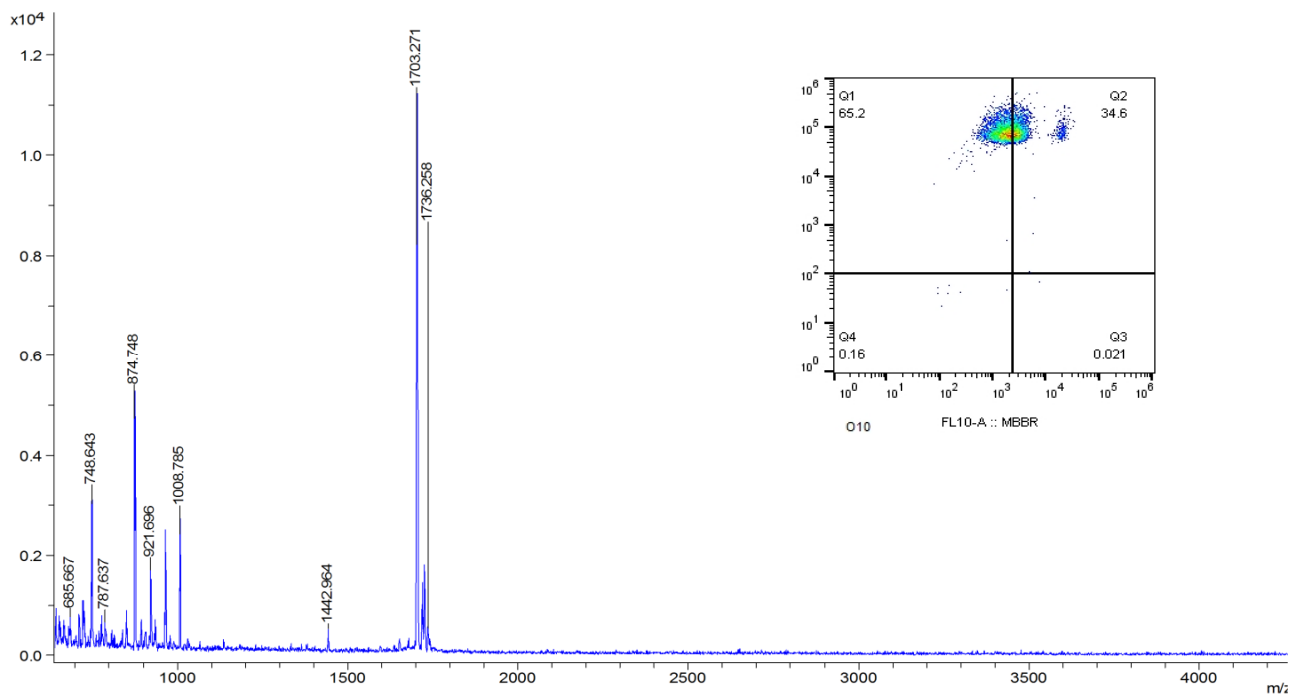

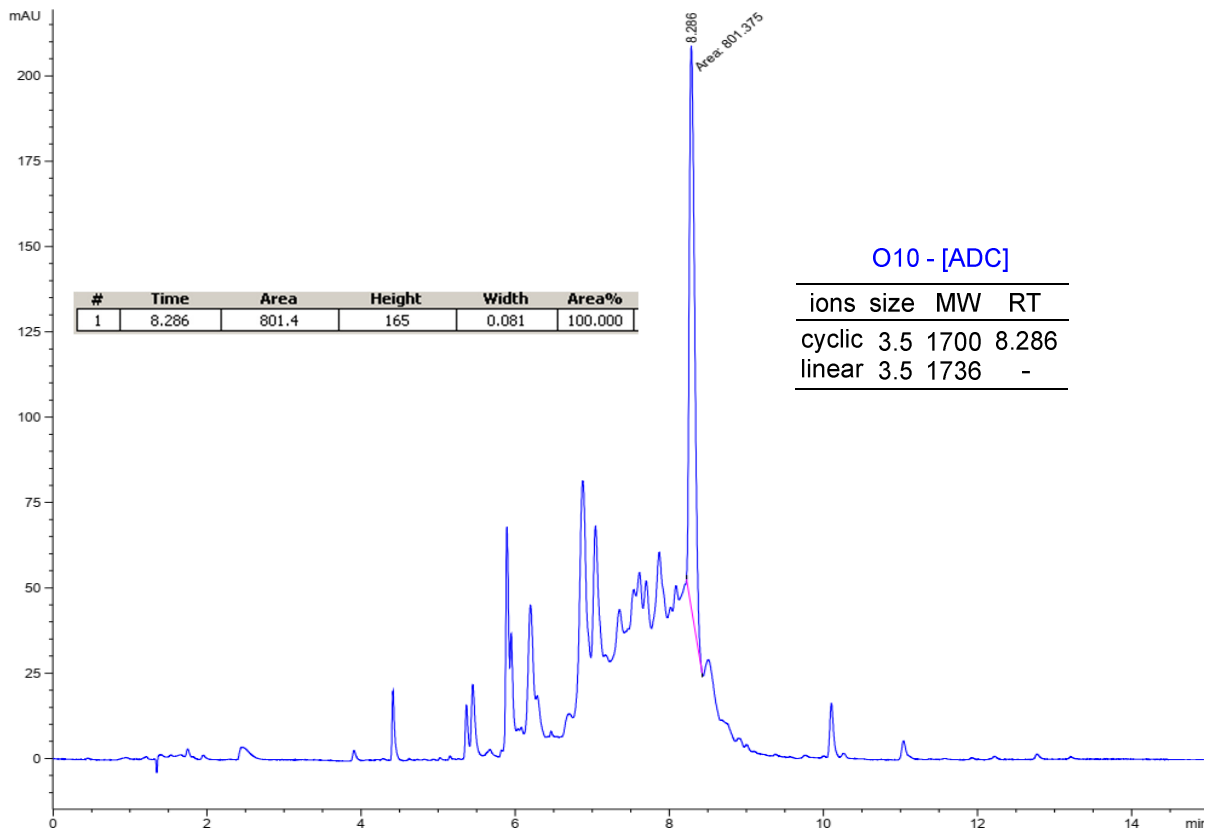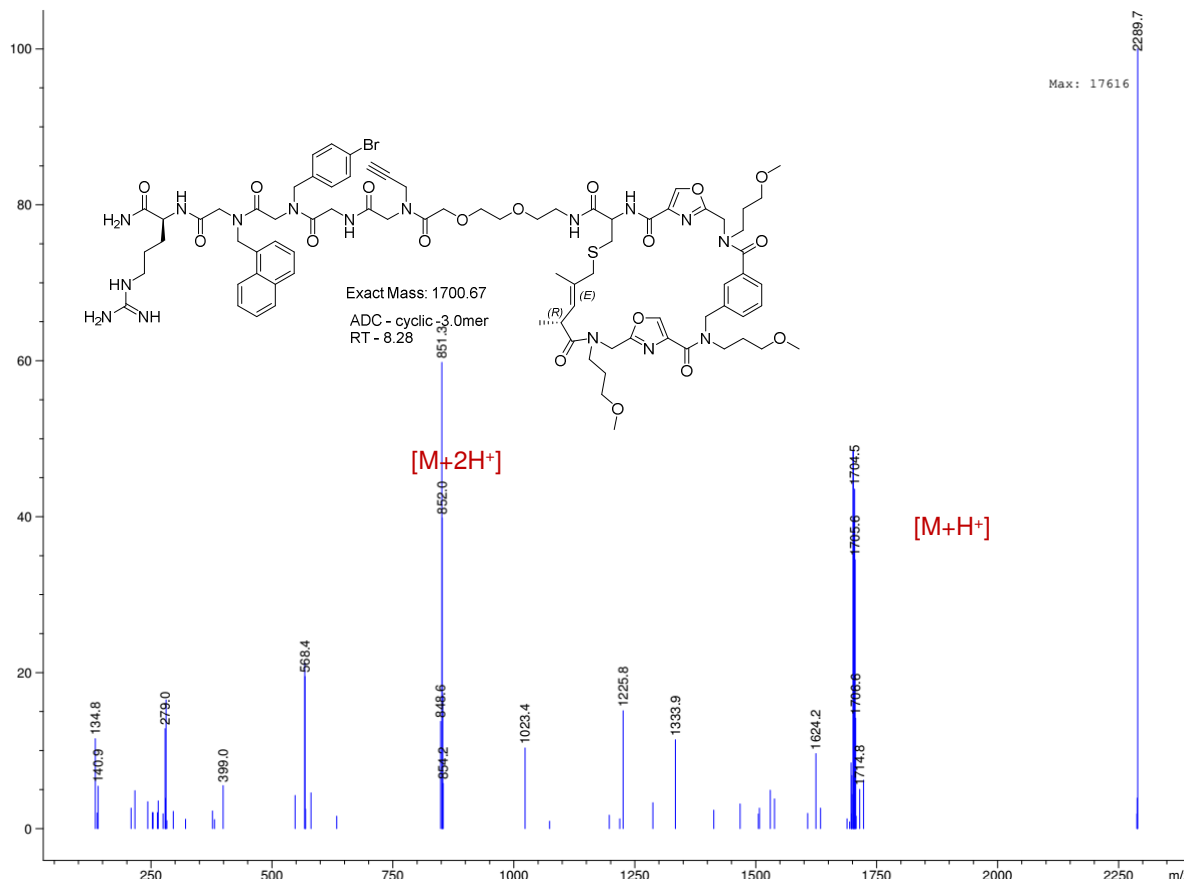

**P1-[BAD]:** Cyclization was complete on both 10  $\mu\text{m}$  & 160  $\mu\text{m}$  beads.

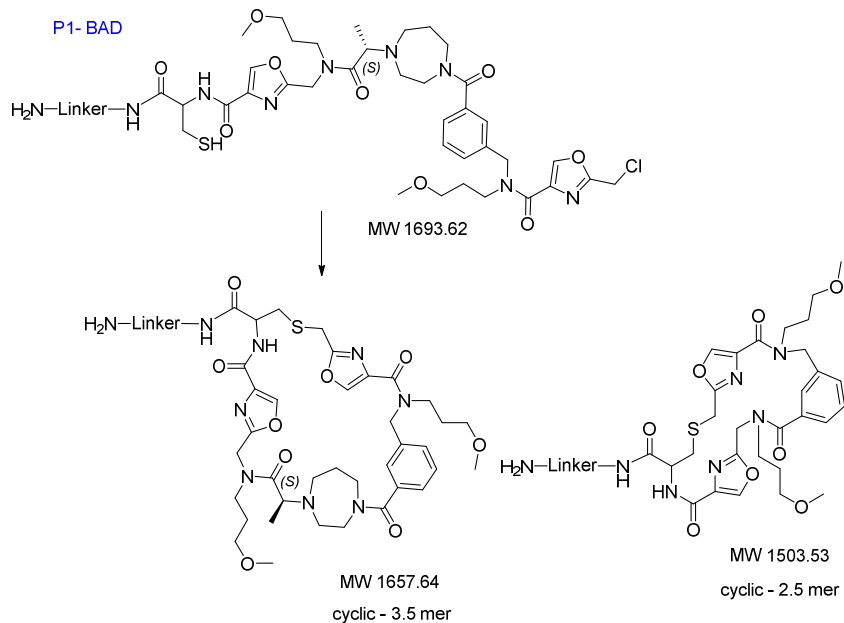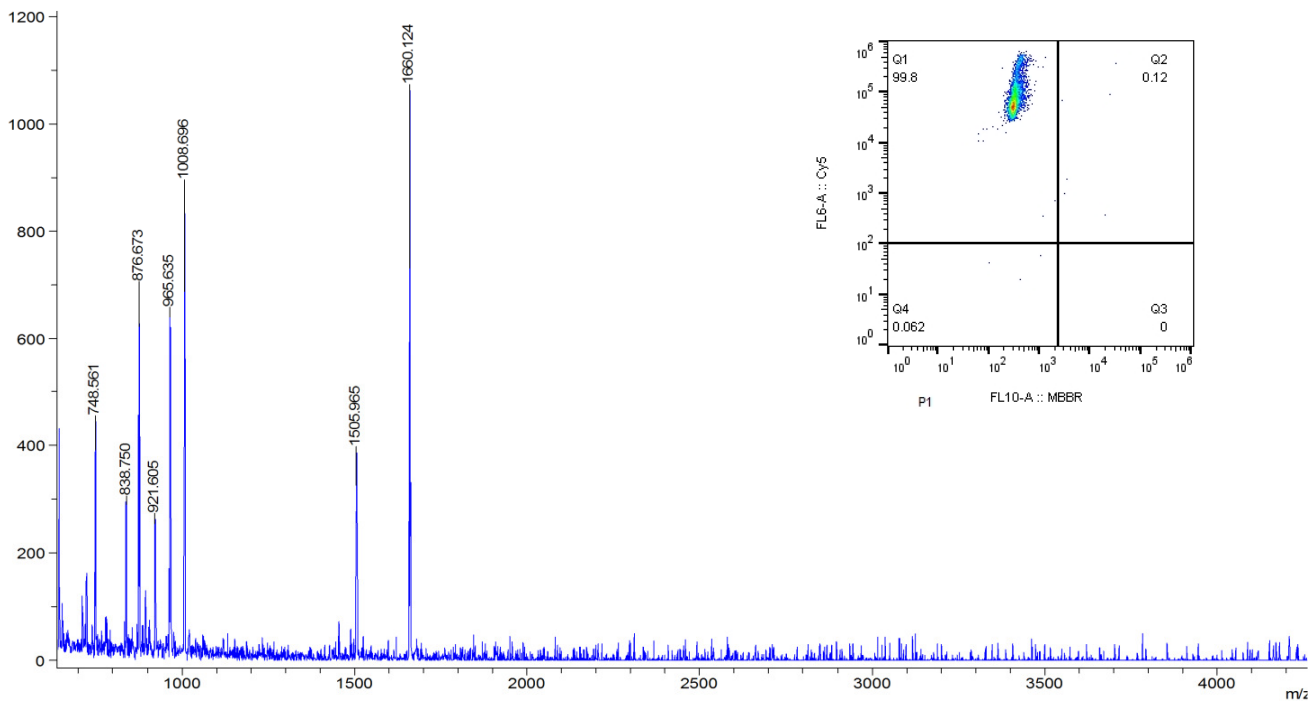

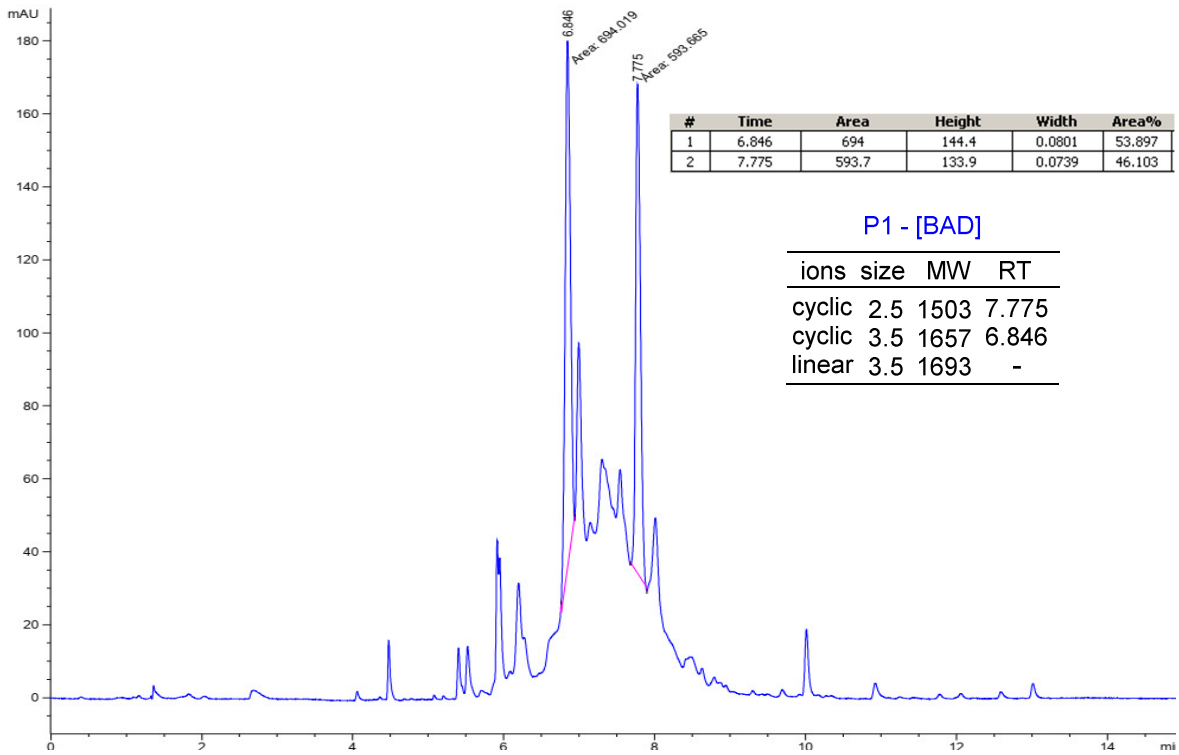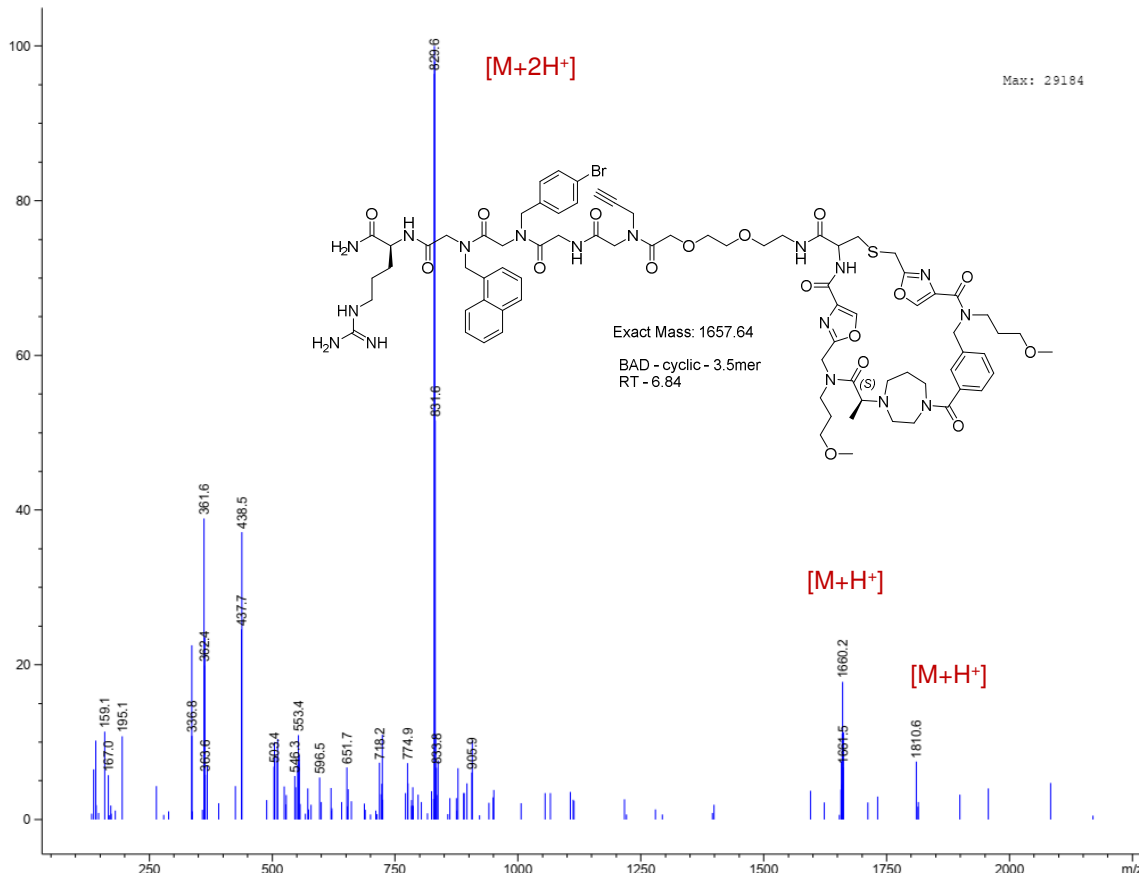

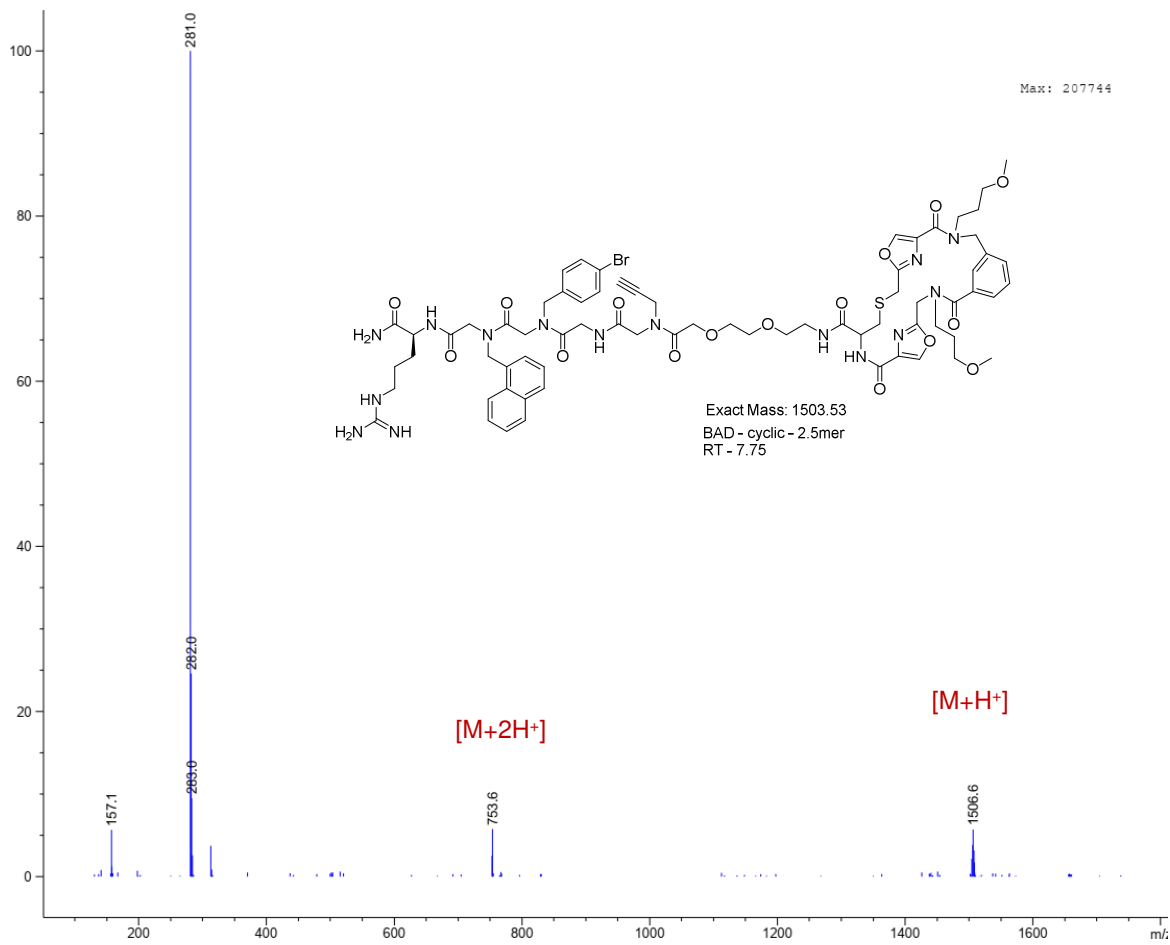

**P2-[BBD]:** Cyclization was complete on both 10  $\mu\text{m}$  & 160  $\mu\text{m}$  beads.

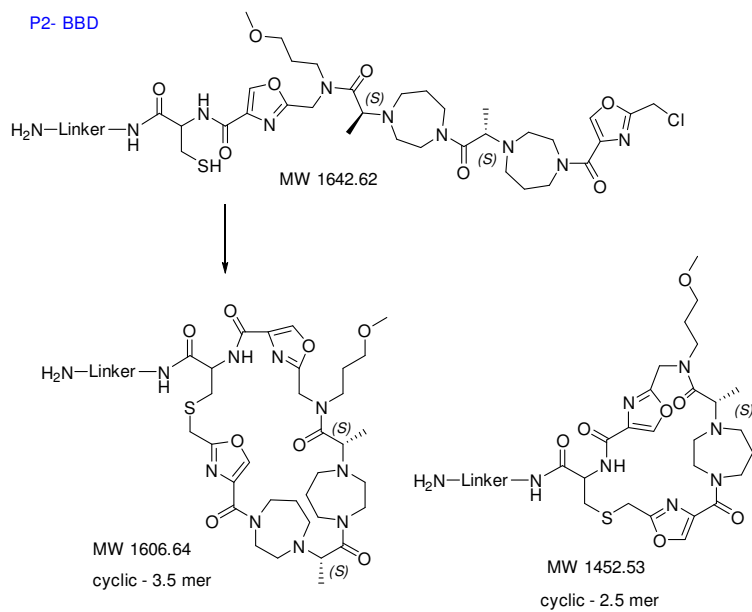



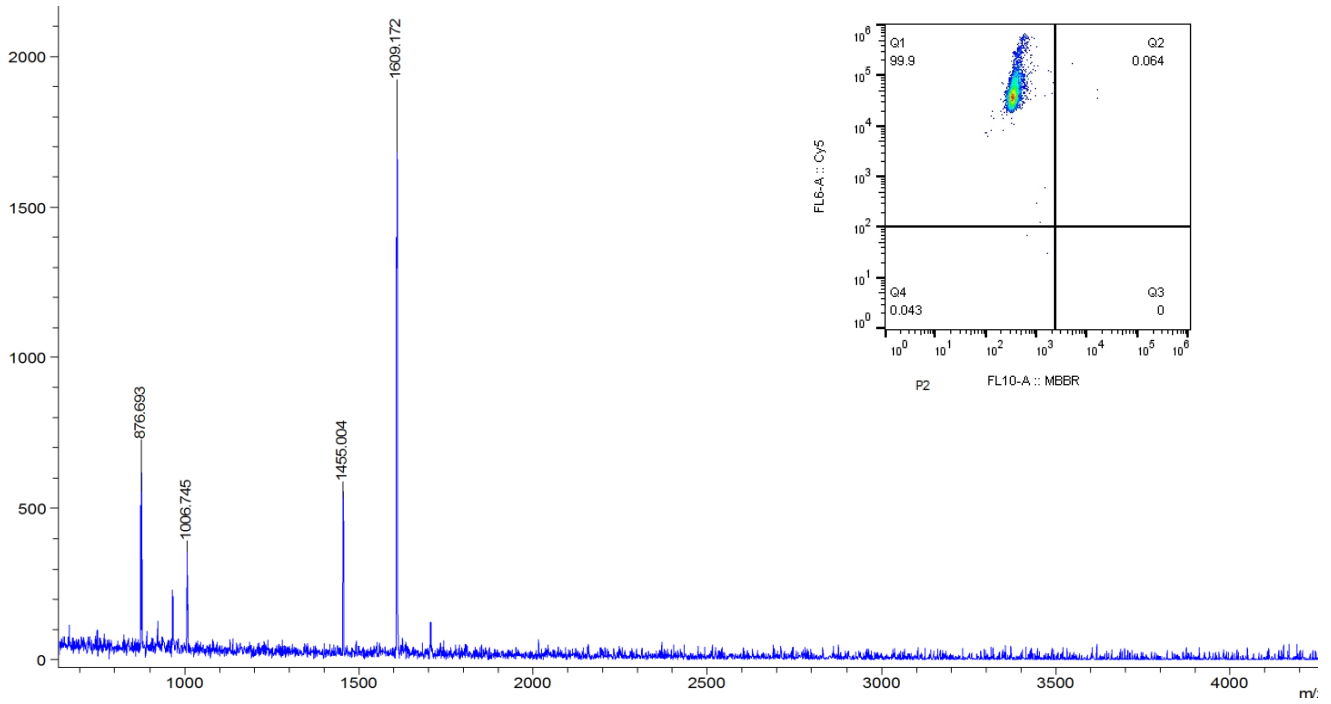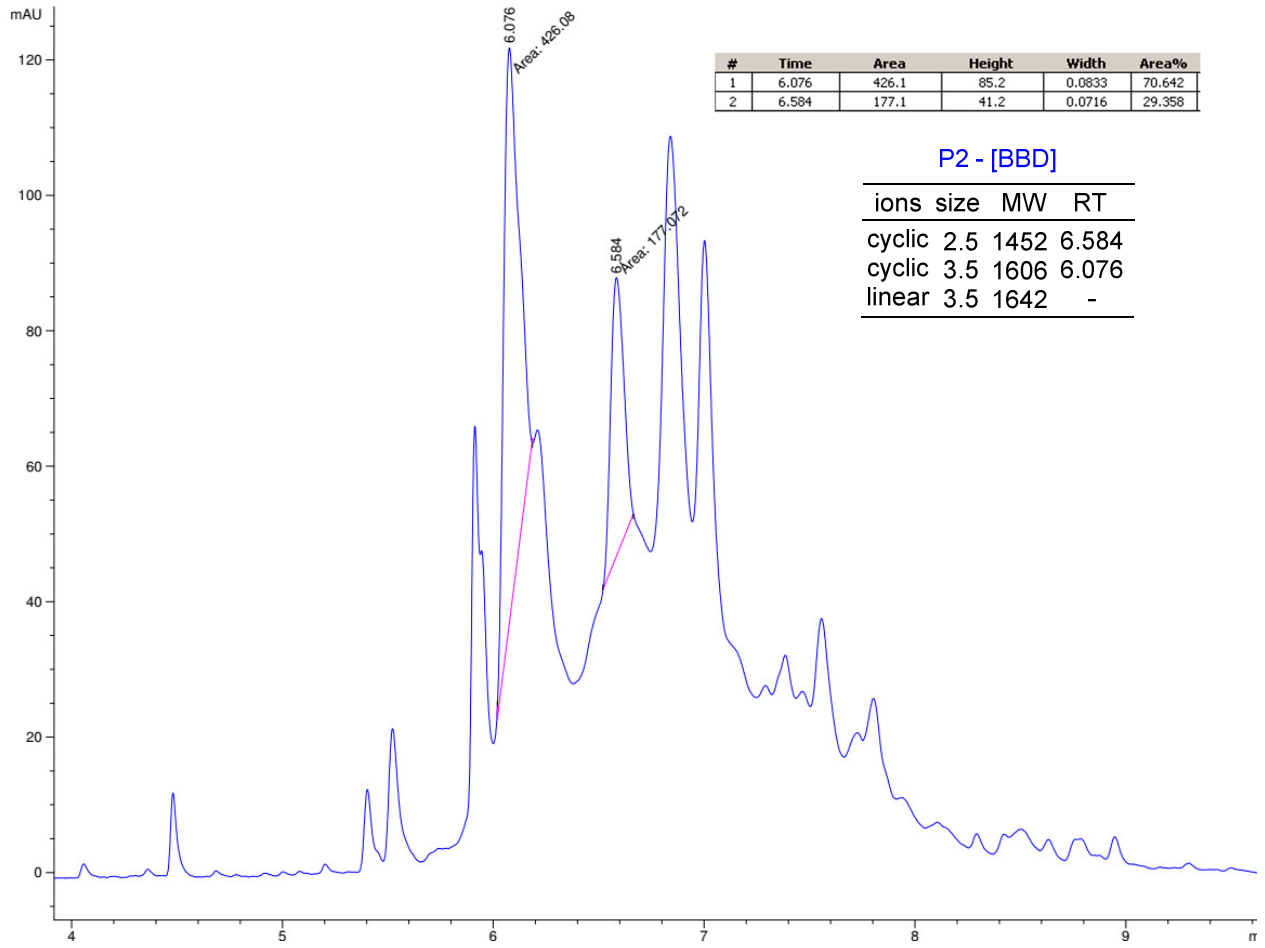

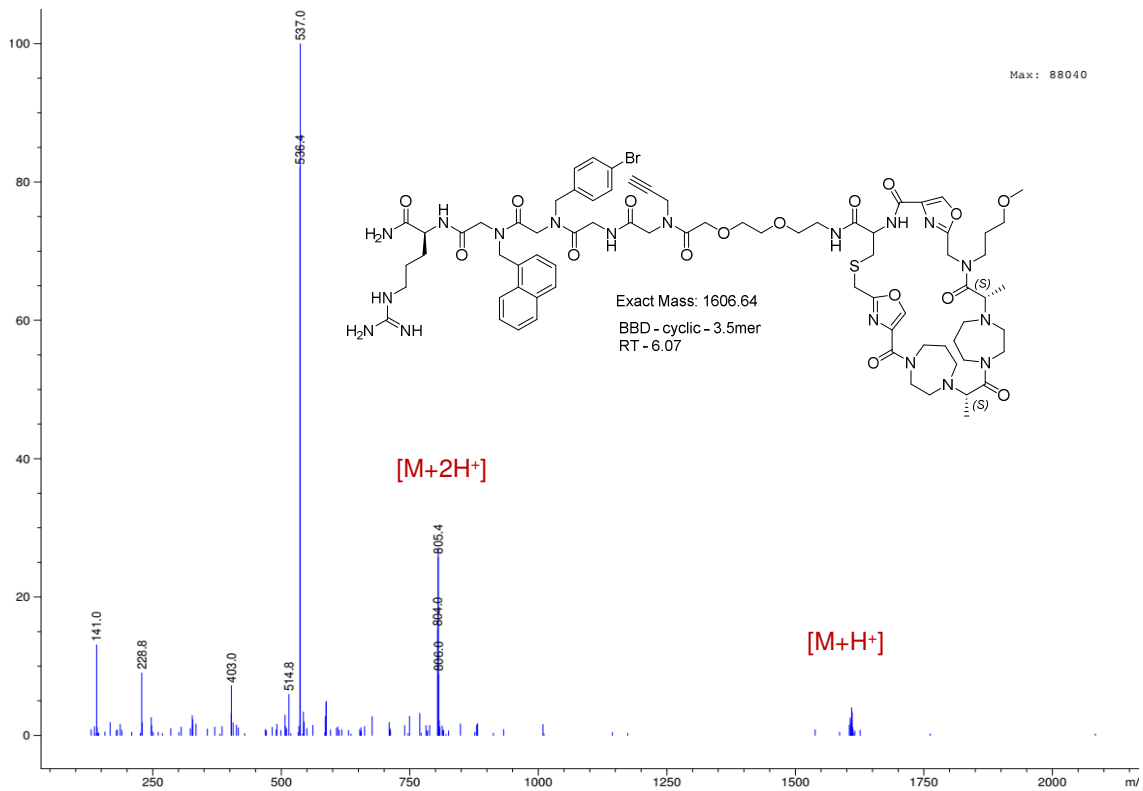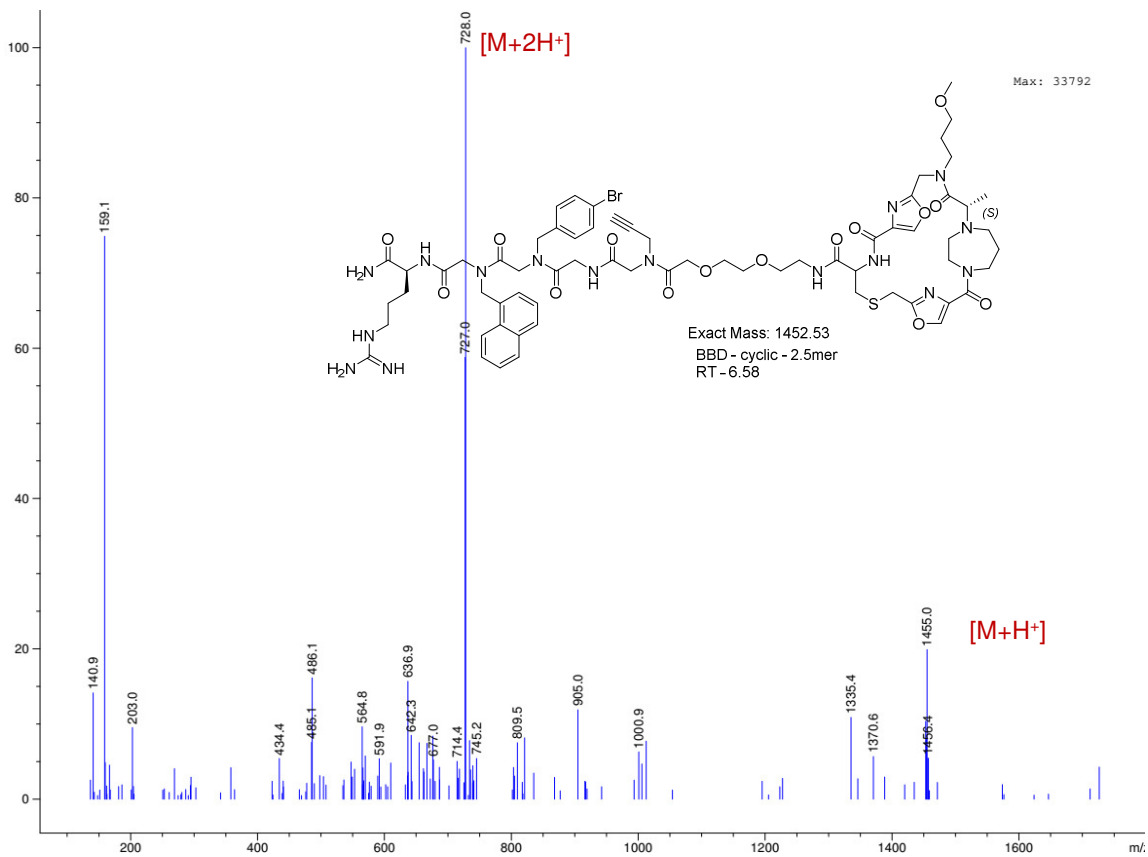

**P3-[BCD]:** Cyclization was complete on both 10  $\mu\text{m}$  & 160  $\mu\text{m}$  beads.

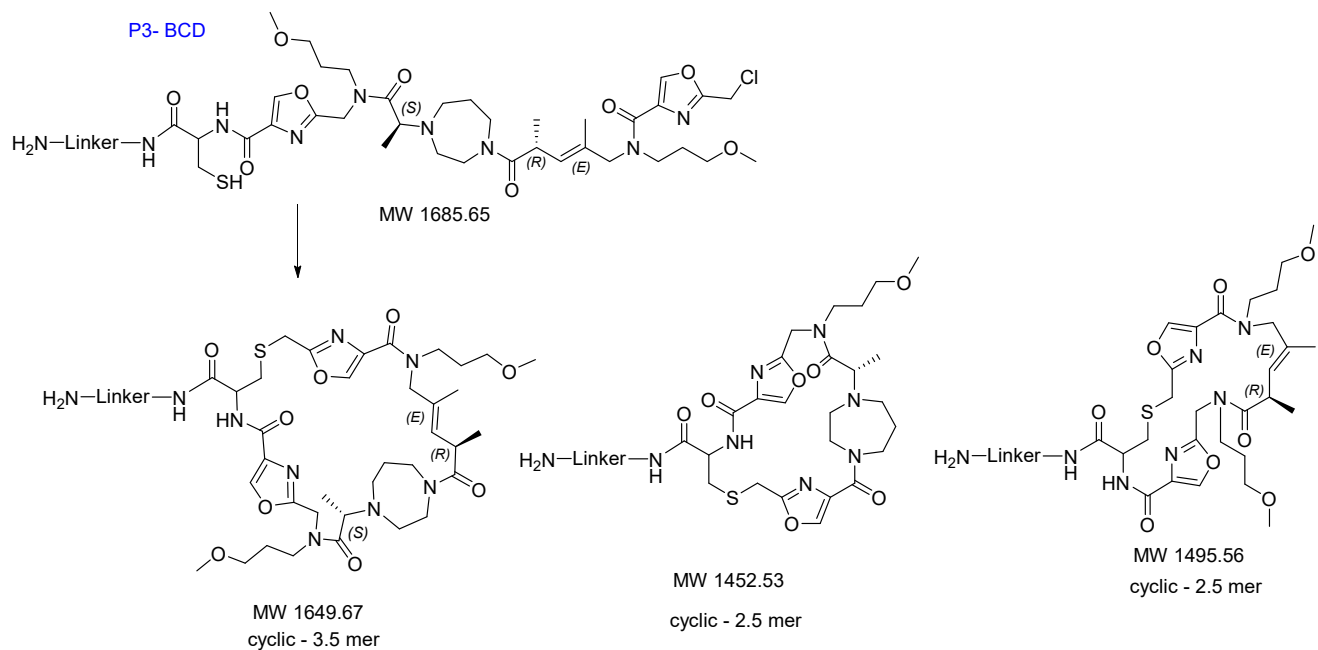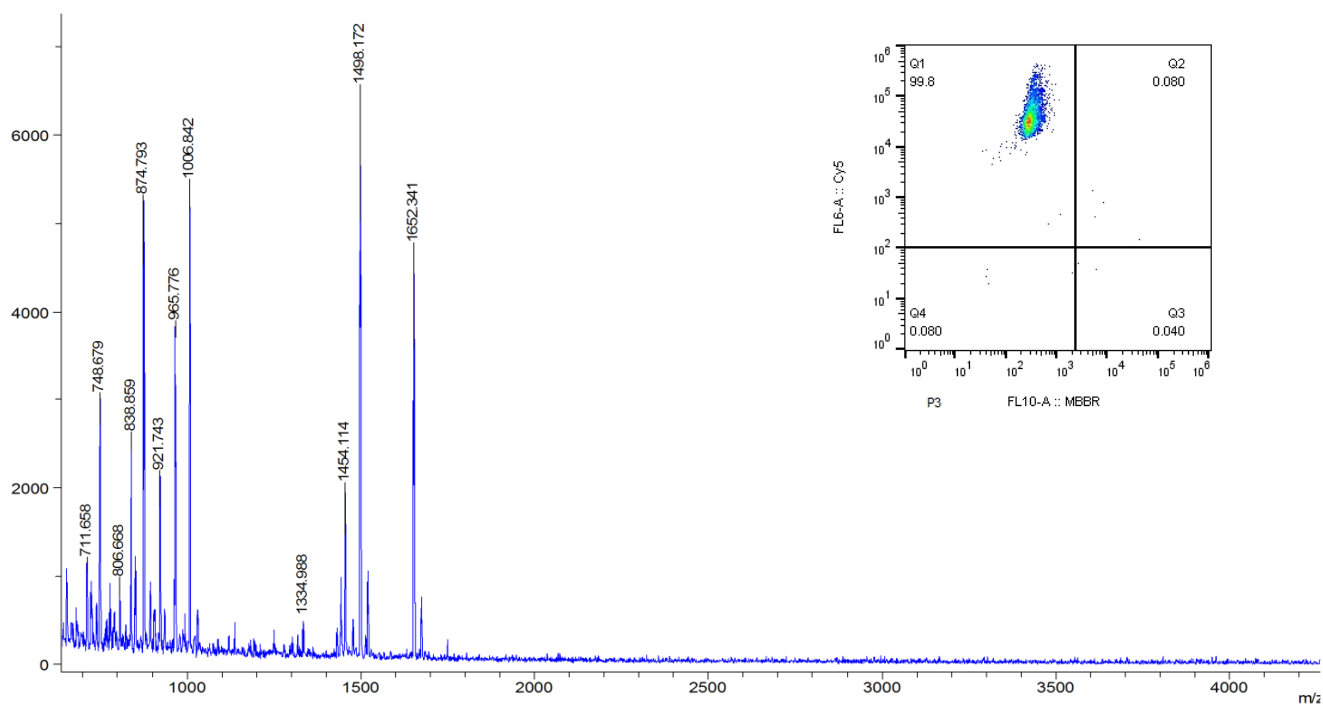

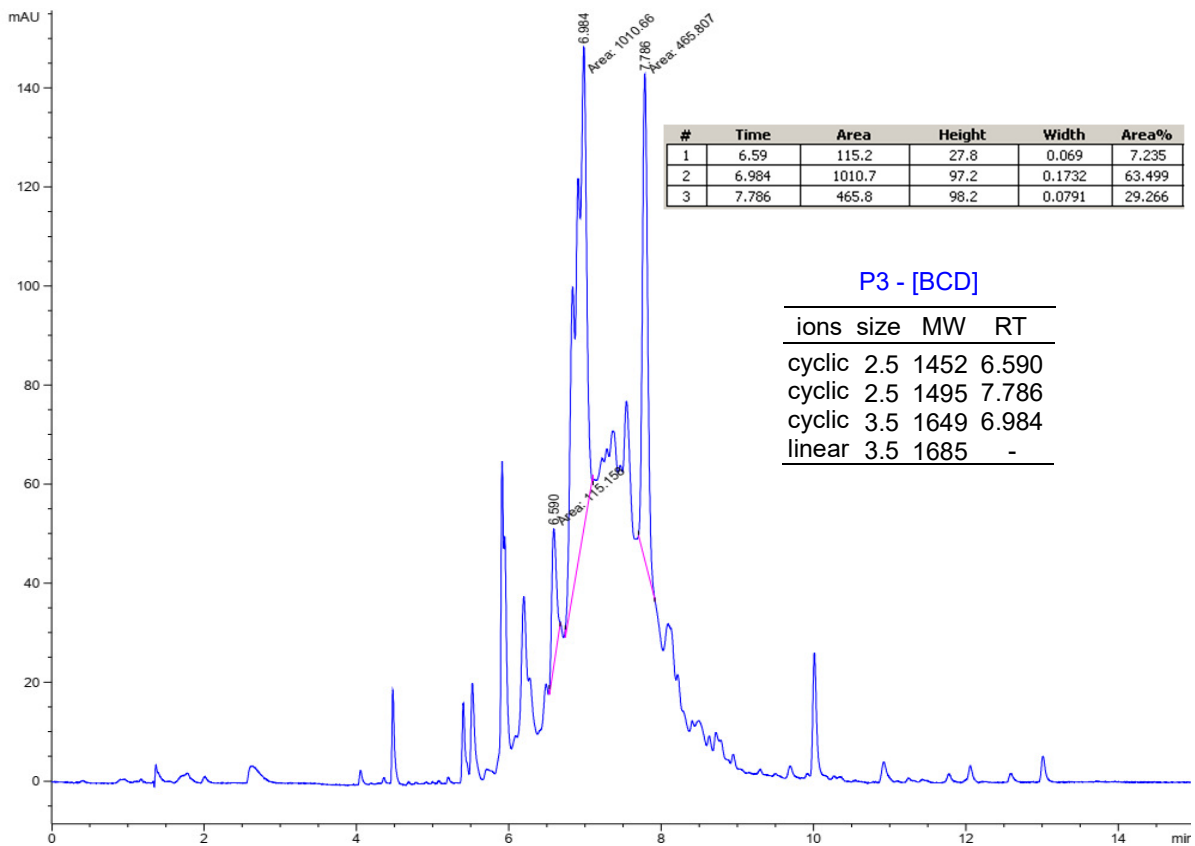

**P3 - [BCD]**

|        | ions size | MW   | RT    |
|--------|-----------|------|-------|
| cyclic | 2.5       | 1452 | 6.590 |
| cyclic | 2.5       | 1495 | 7.786 |
| cyclic | 3.5       | 1649 | 6.984 |
| linear | 3.5       | 1685 | -     |

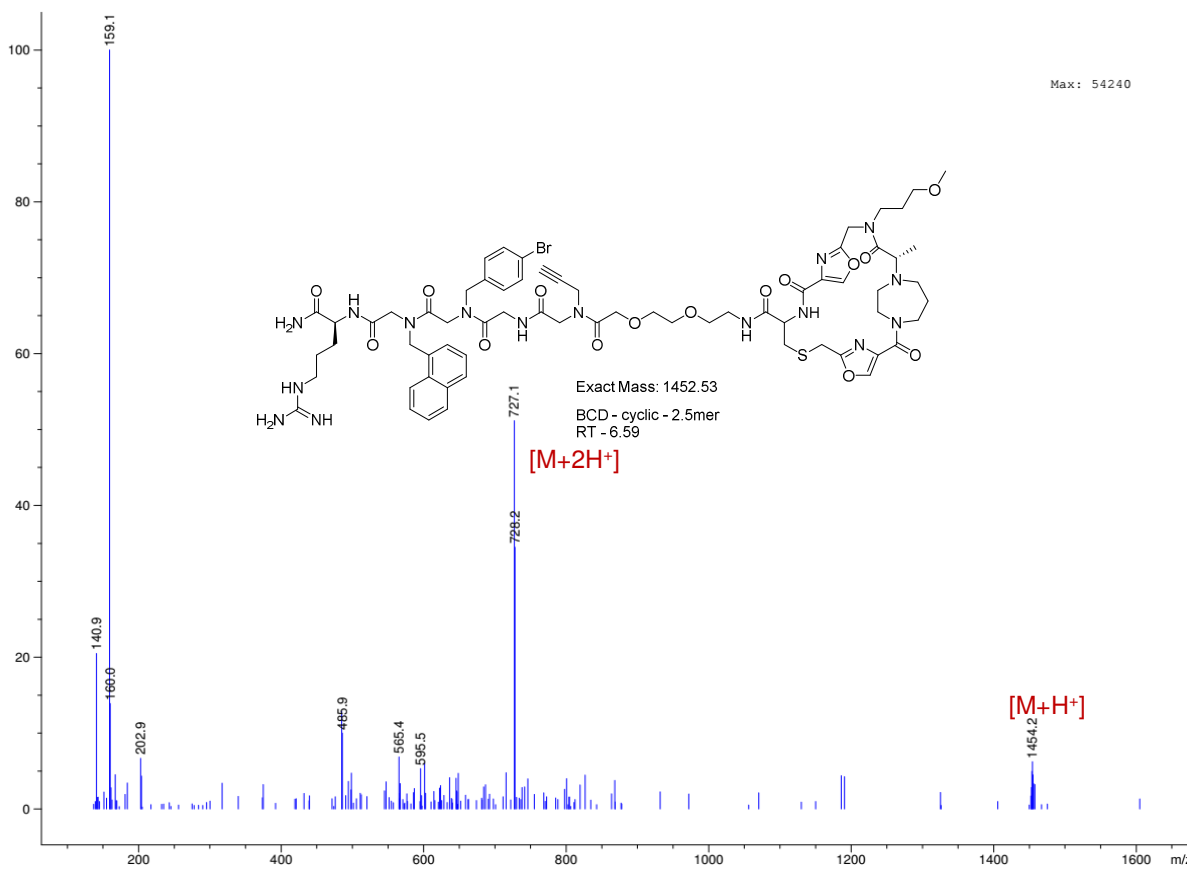

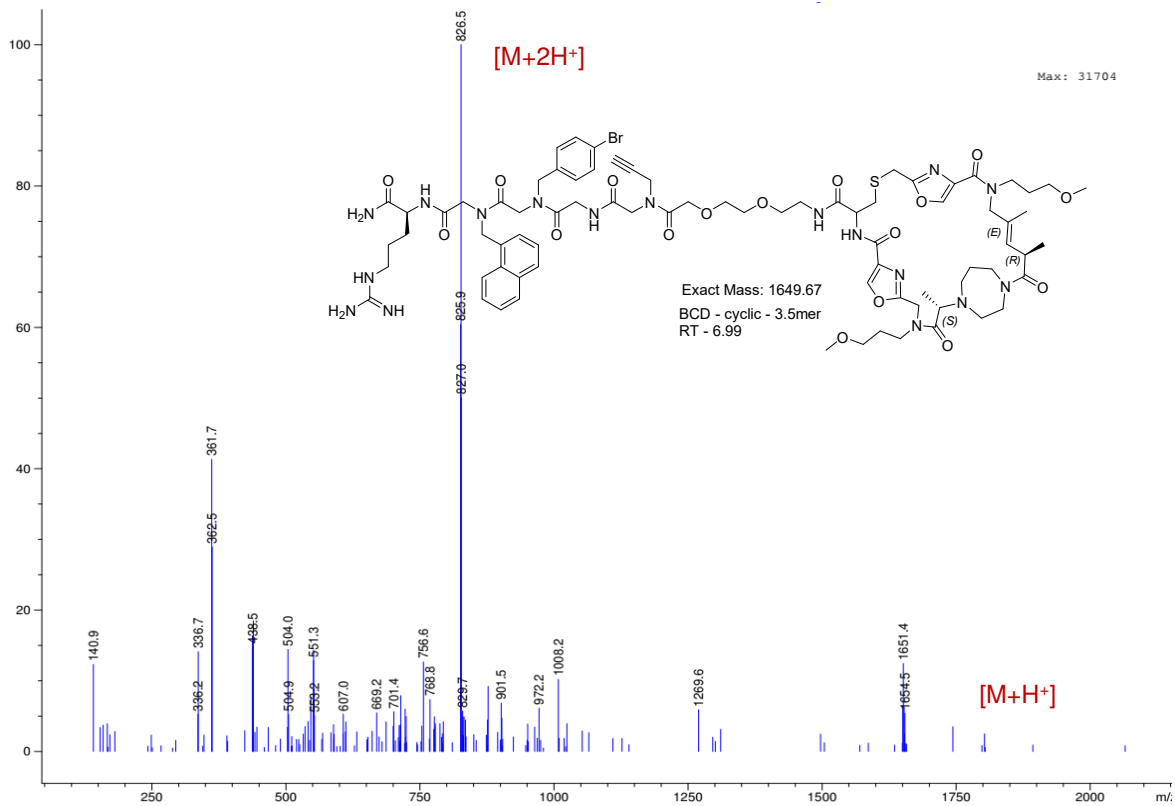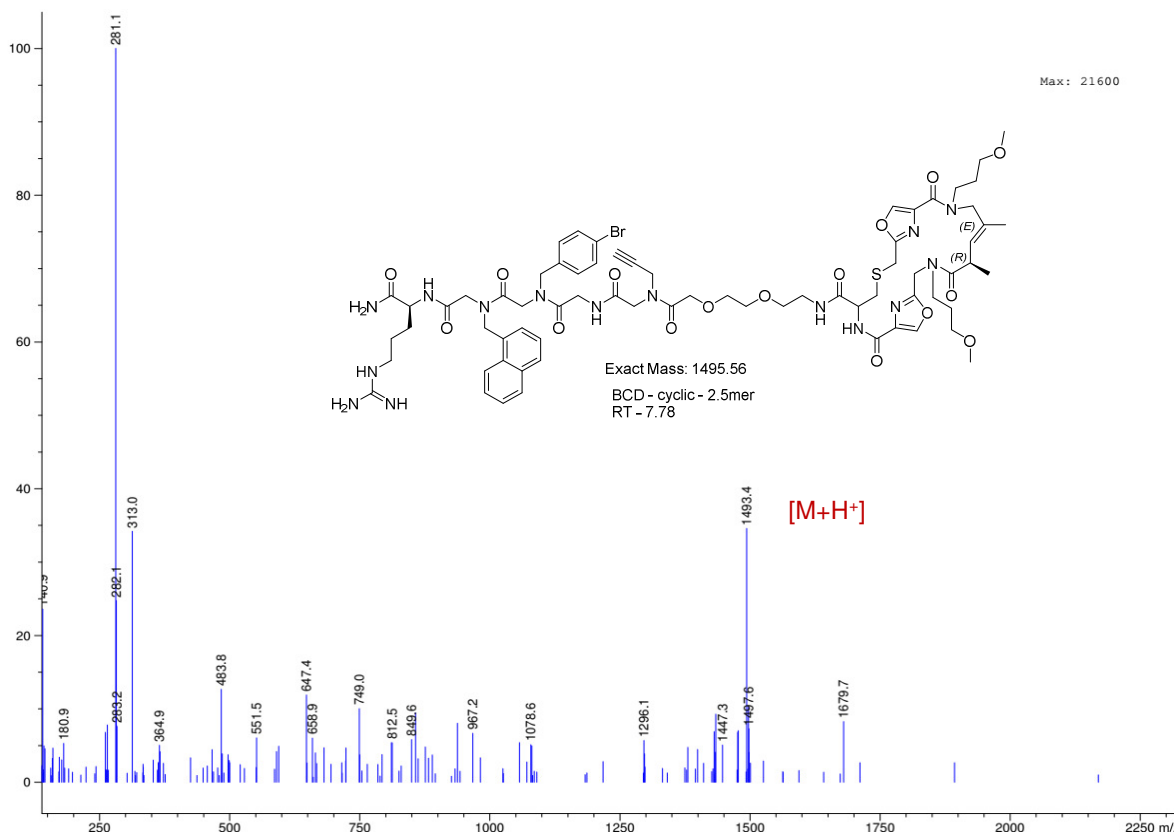





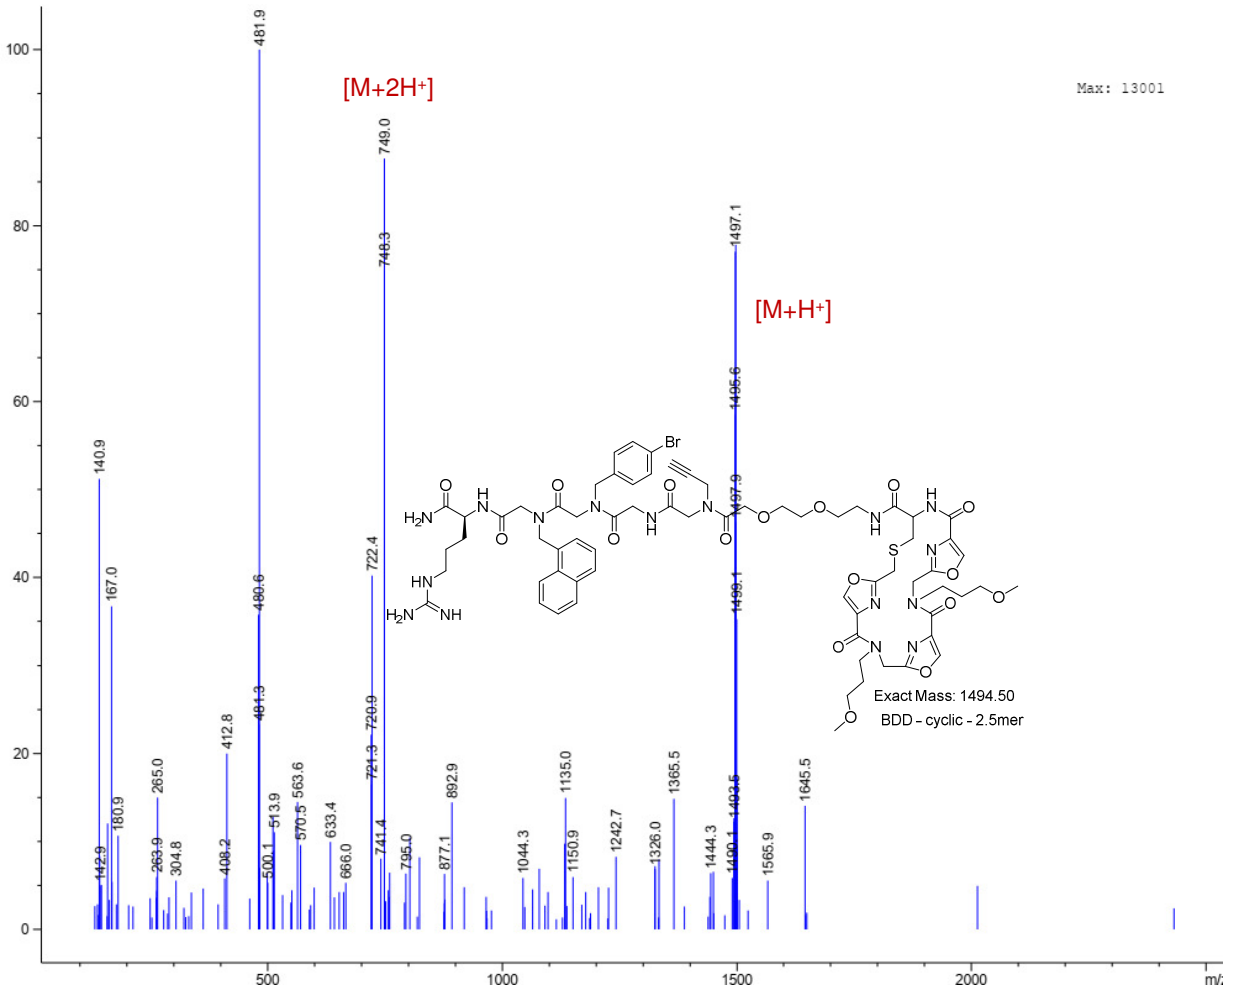

**P7-[BAC]:** Cyclization was complete on both 10  $\mu\text{m}$  & 160  $\mu\text{m}$  beads.

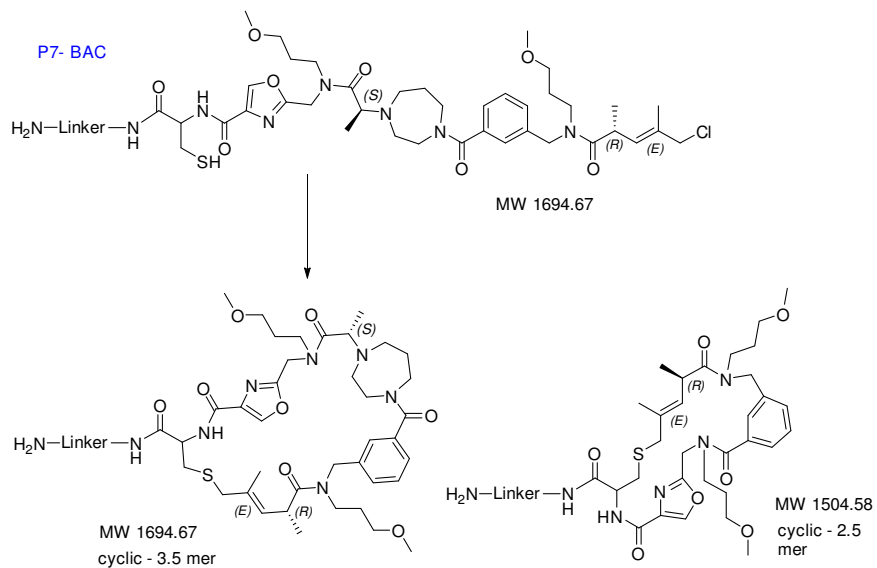



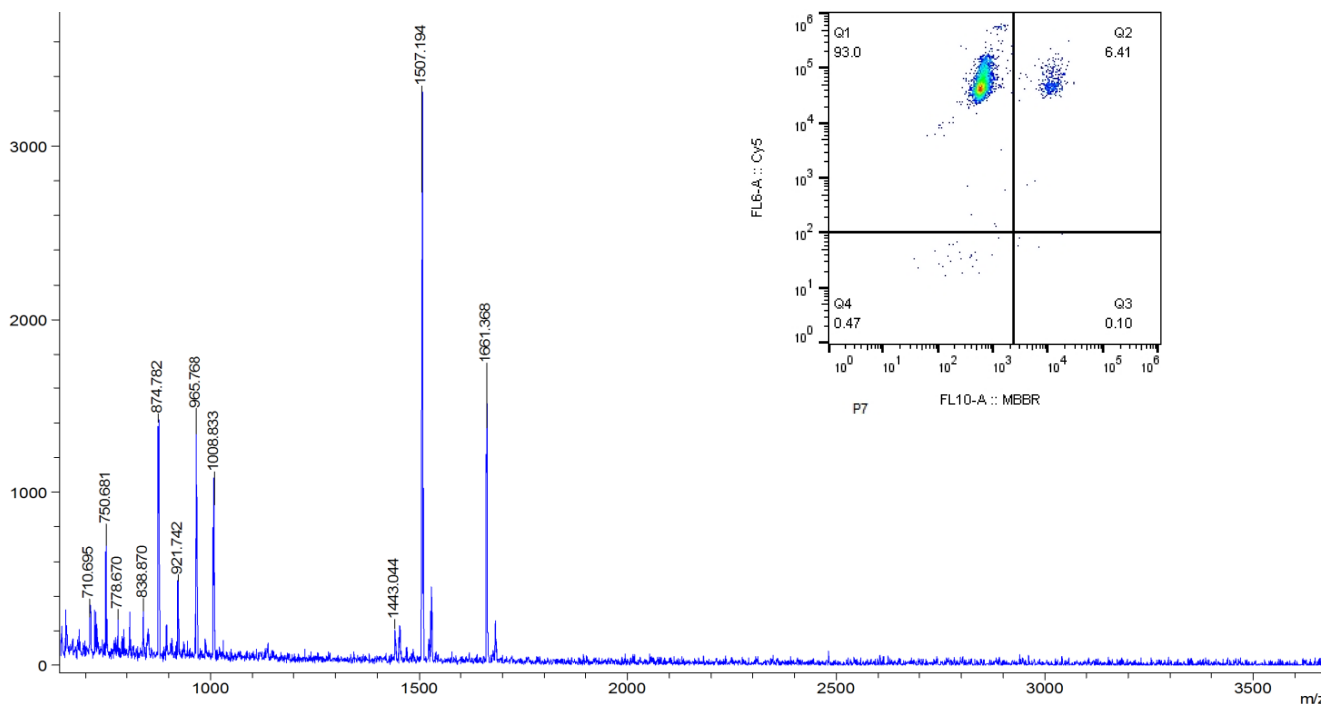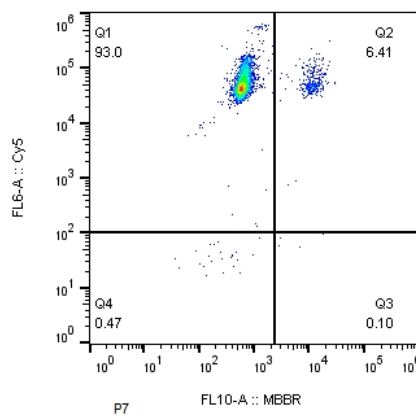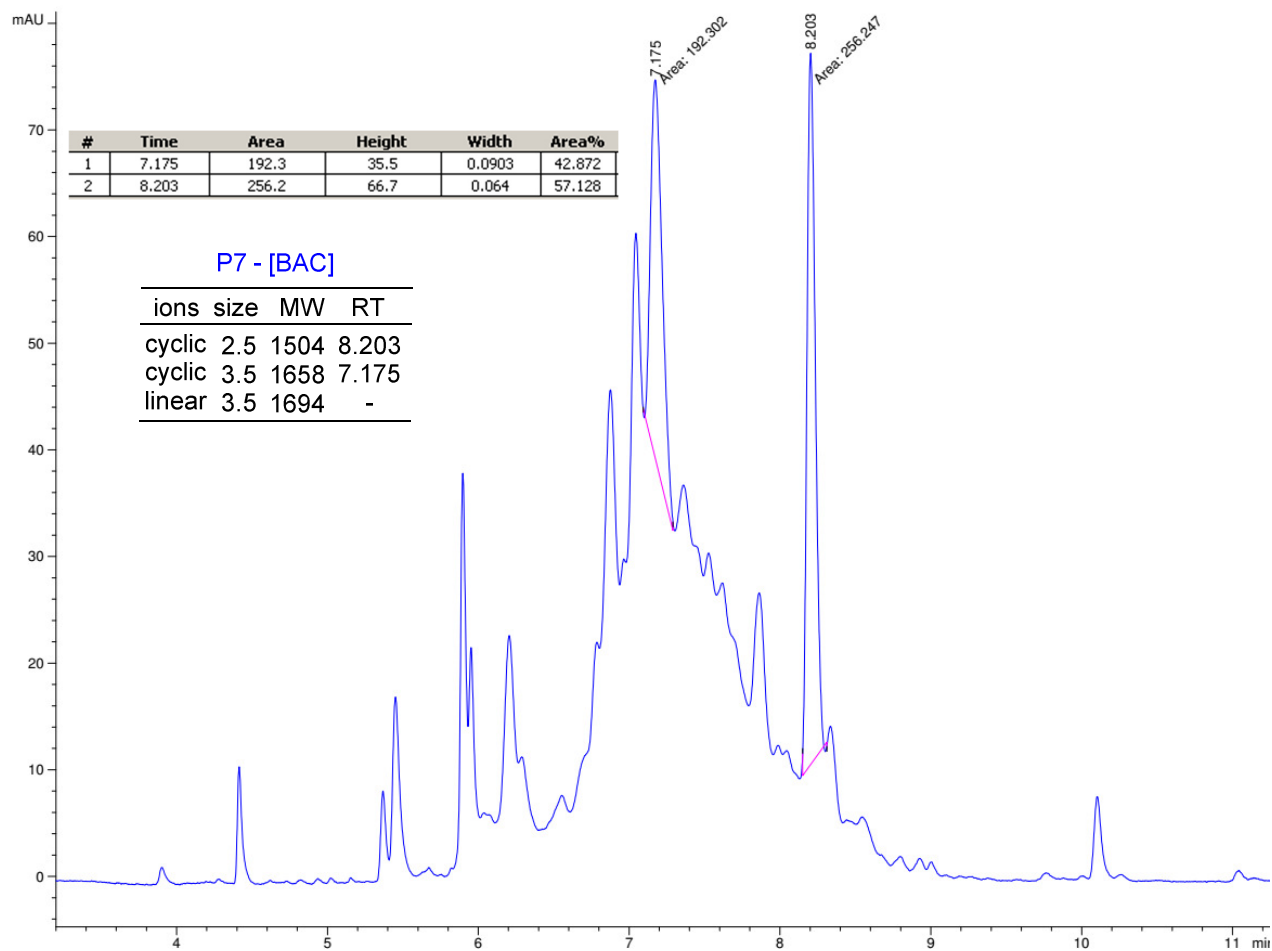

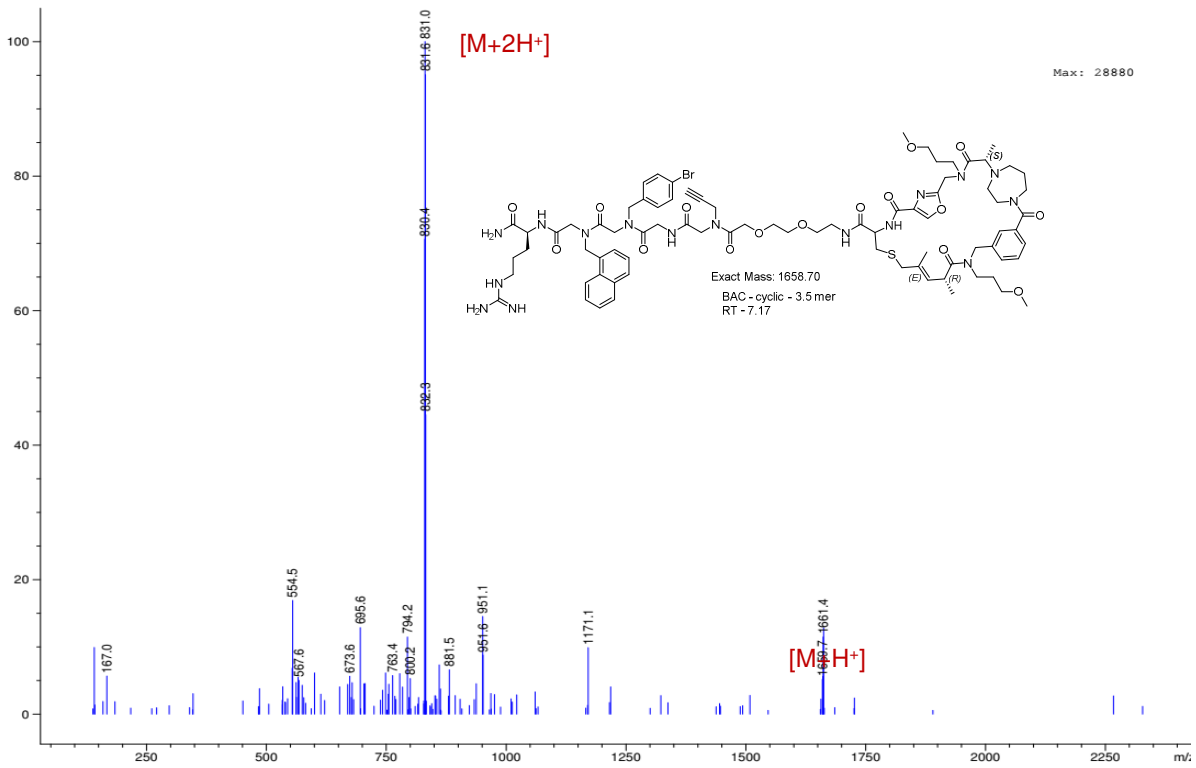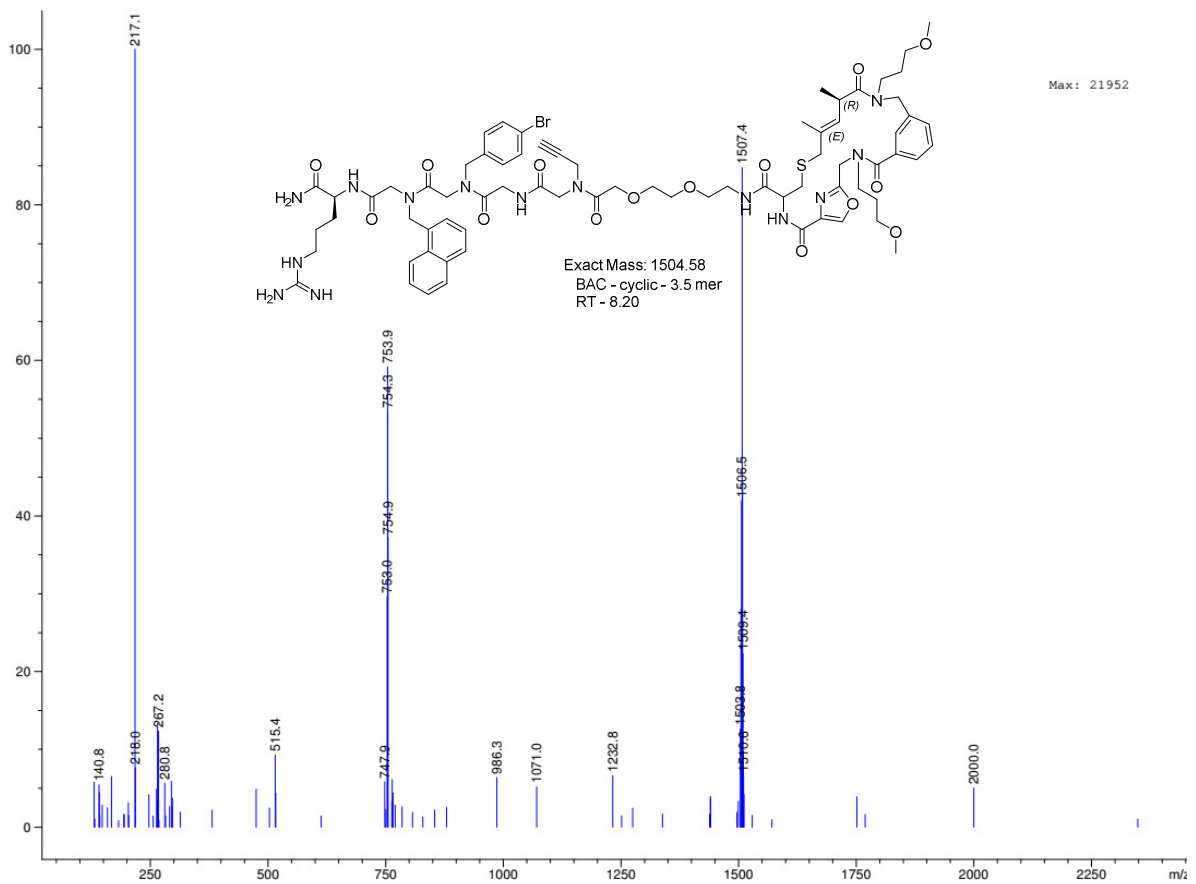

**P8-[BBC]:** Cyclization was complete on both 10  $\mu\text{m}$  & 160  $\mu\text{m}$ .

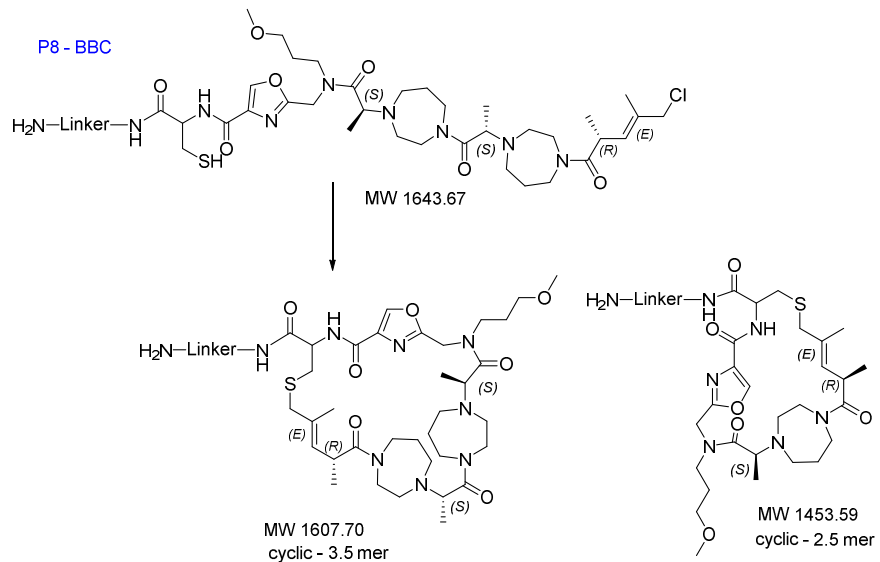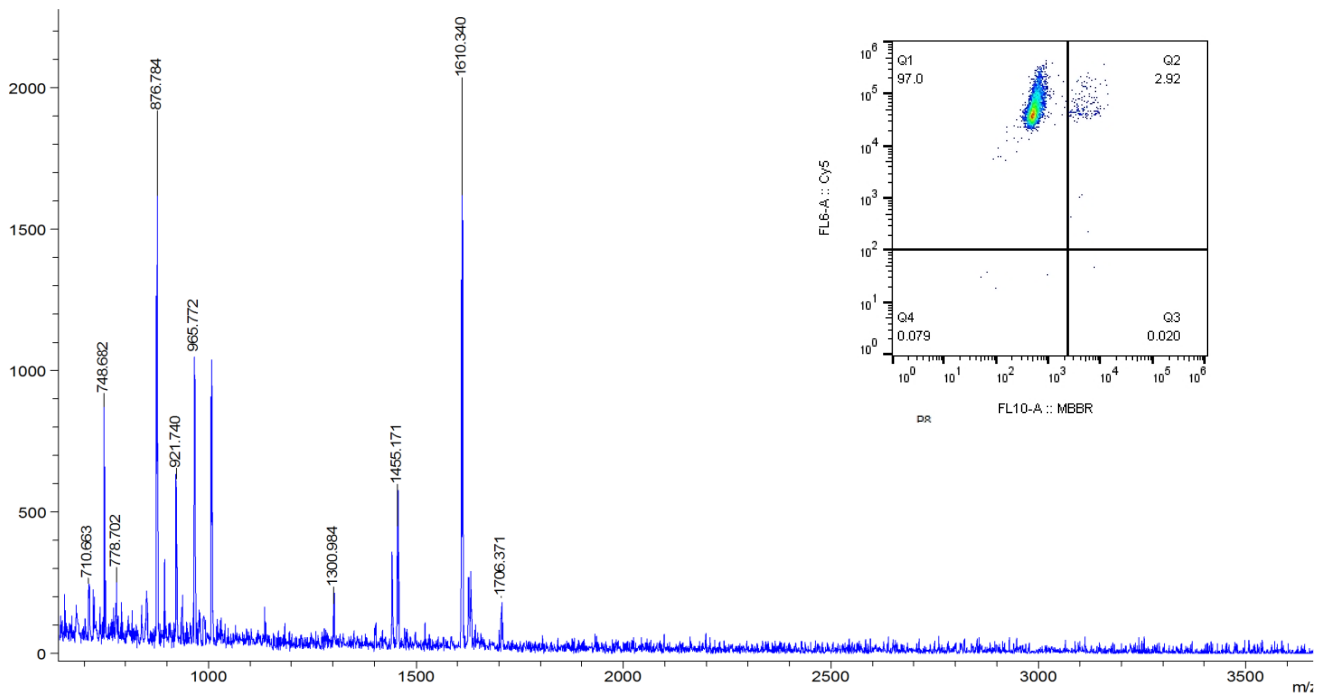

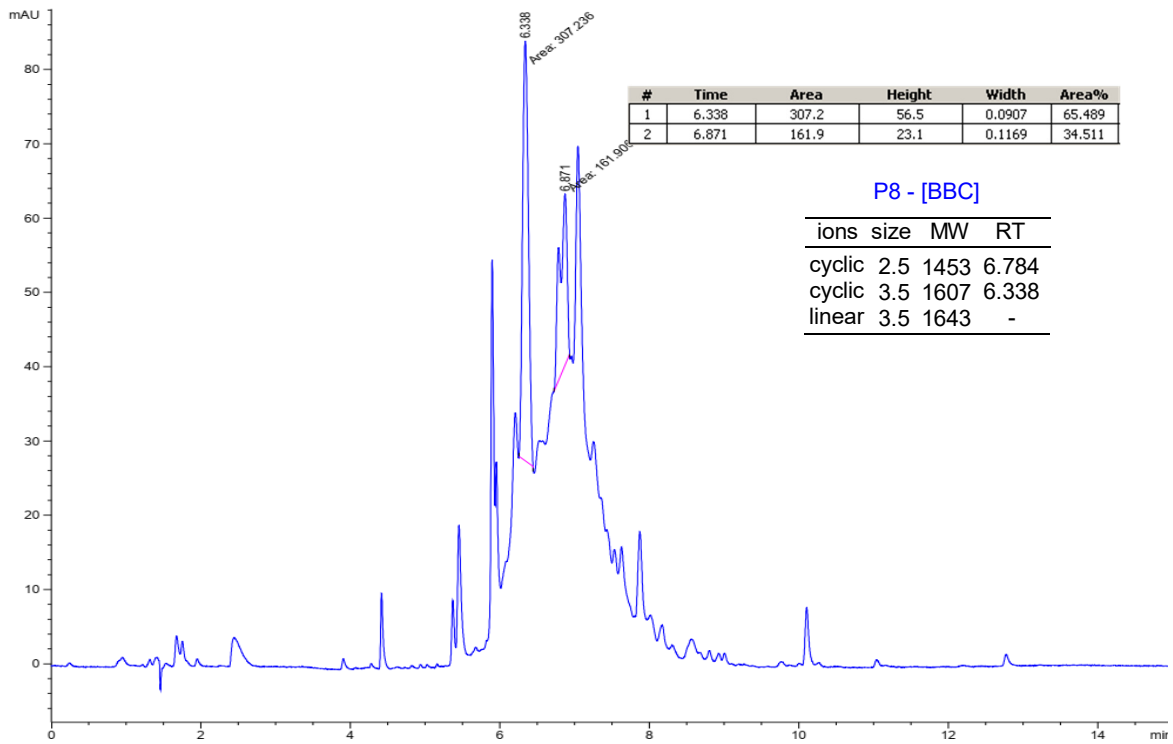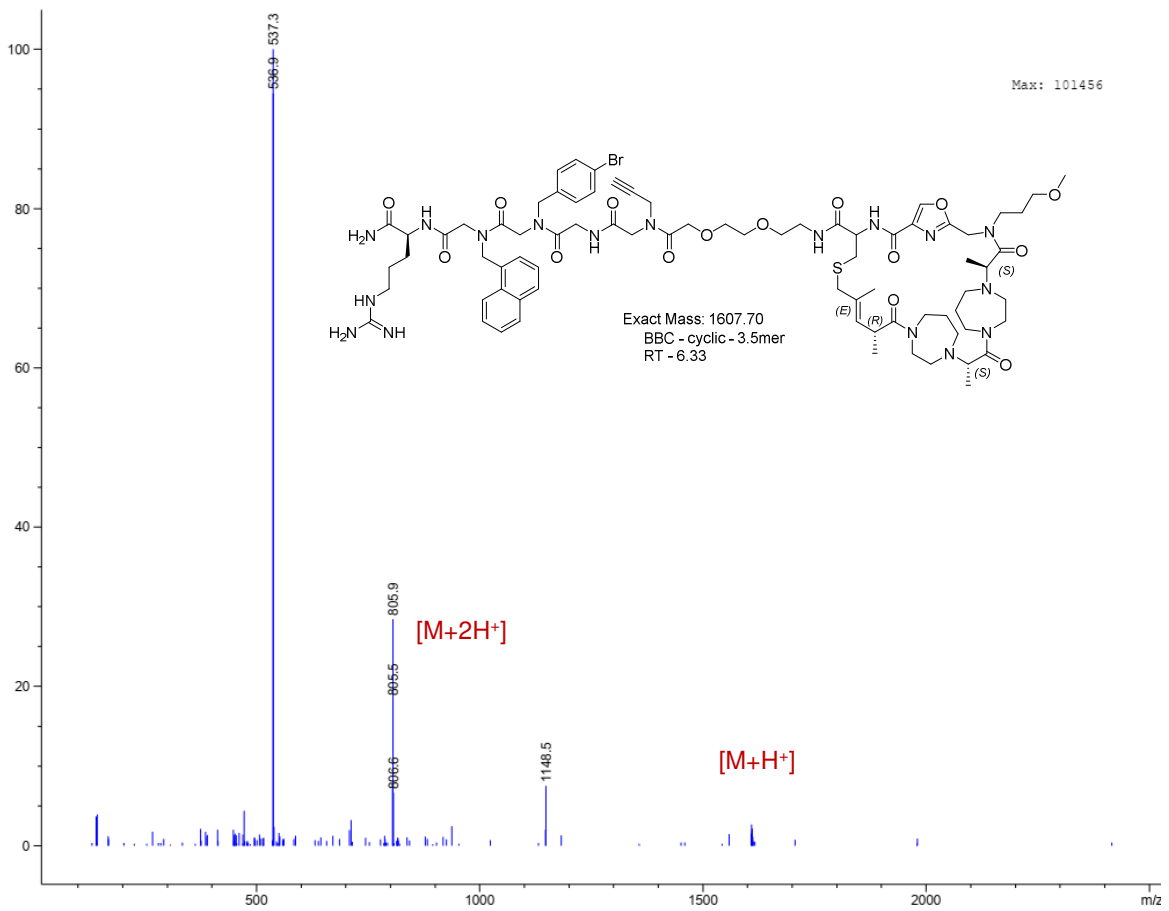

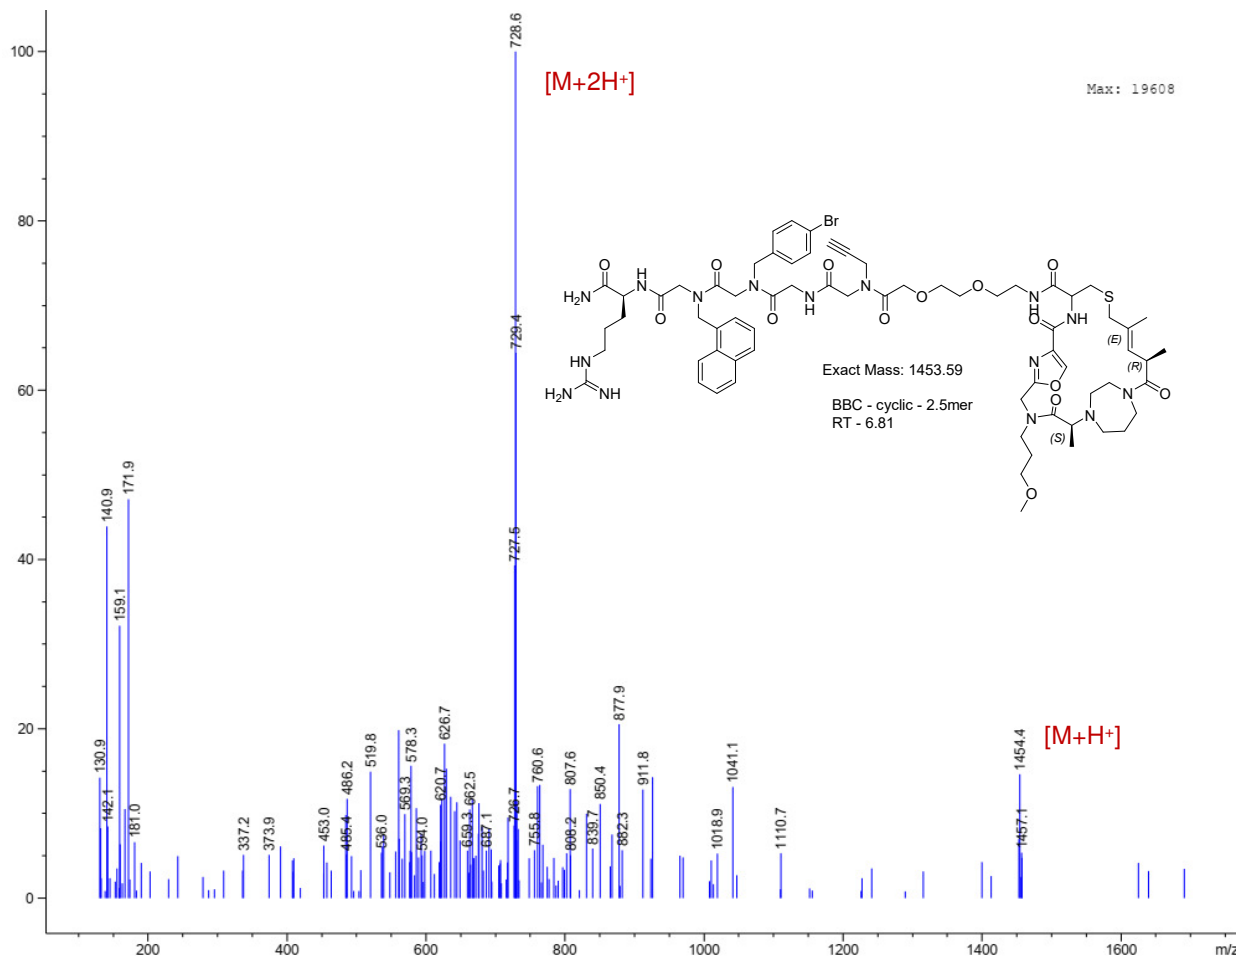

**P9-[BCC]:** Cyclization was complete on both 10  $\mu\text{m}$  & 160  $\mu\text{m}$  beads.

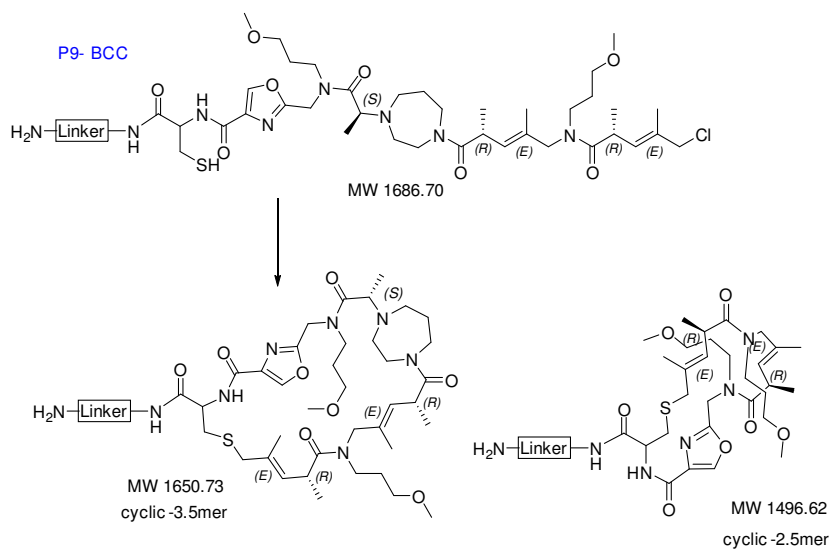

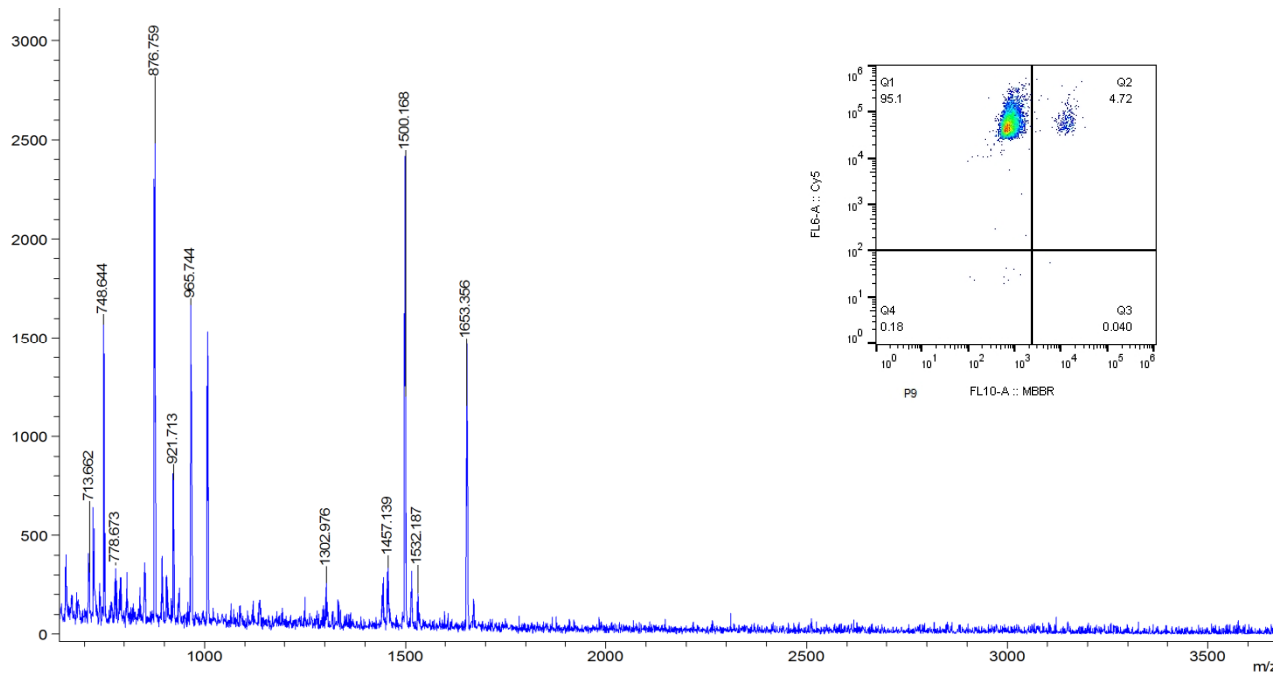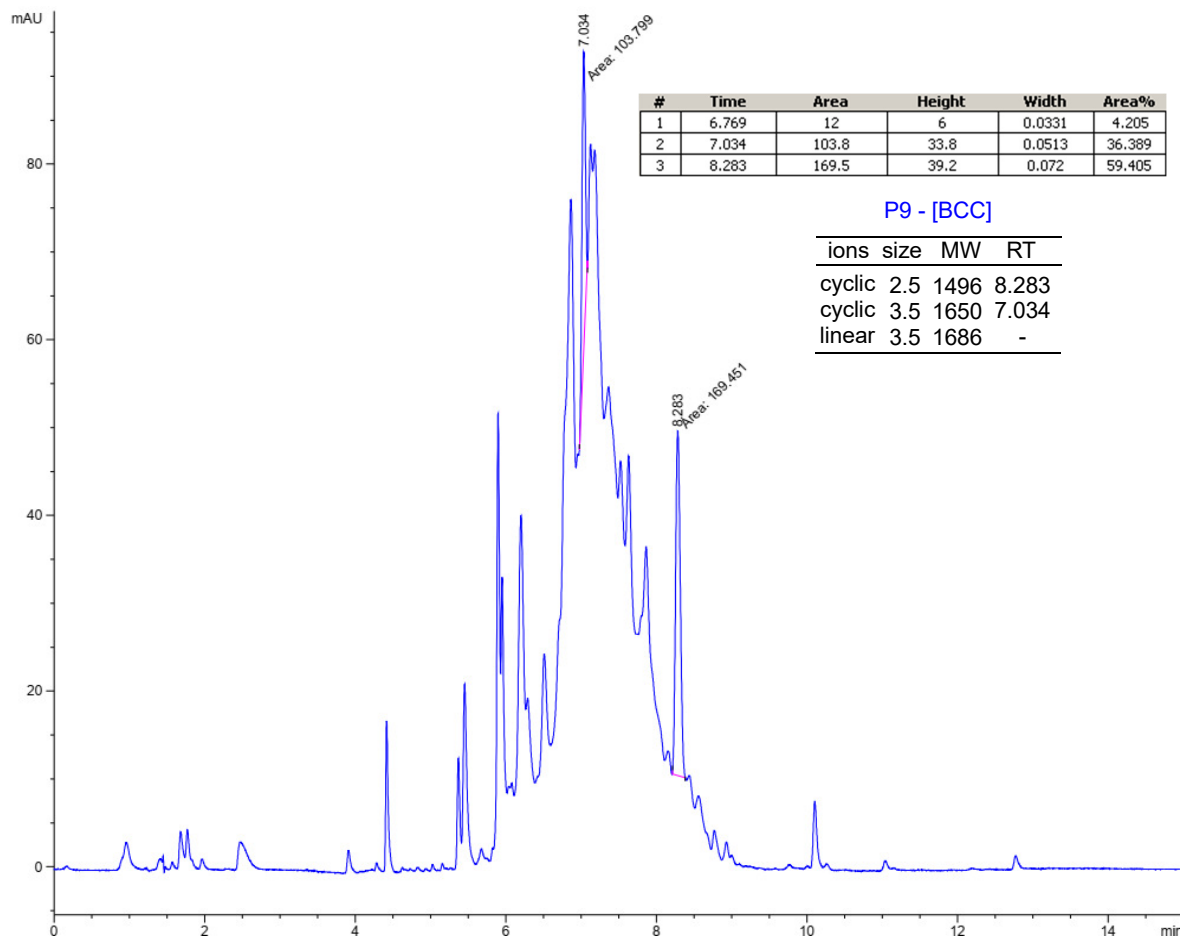

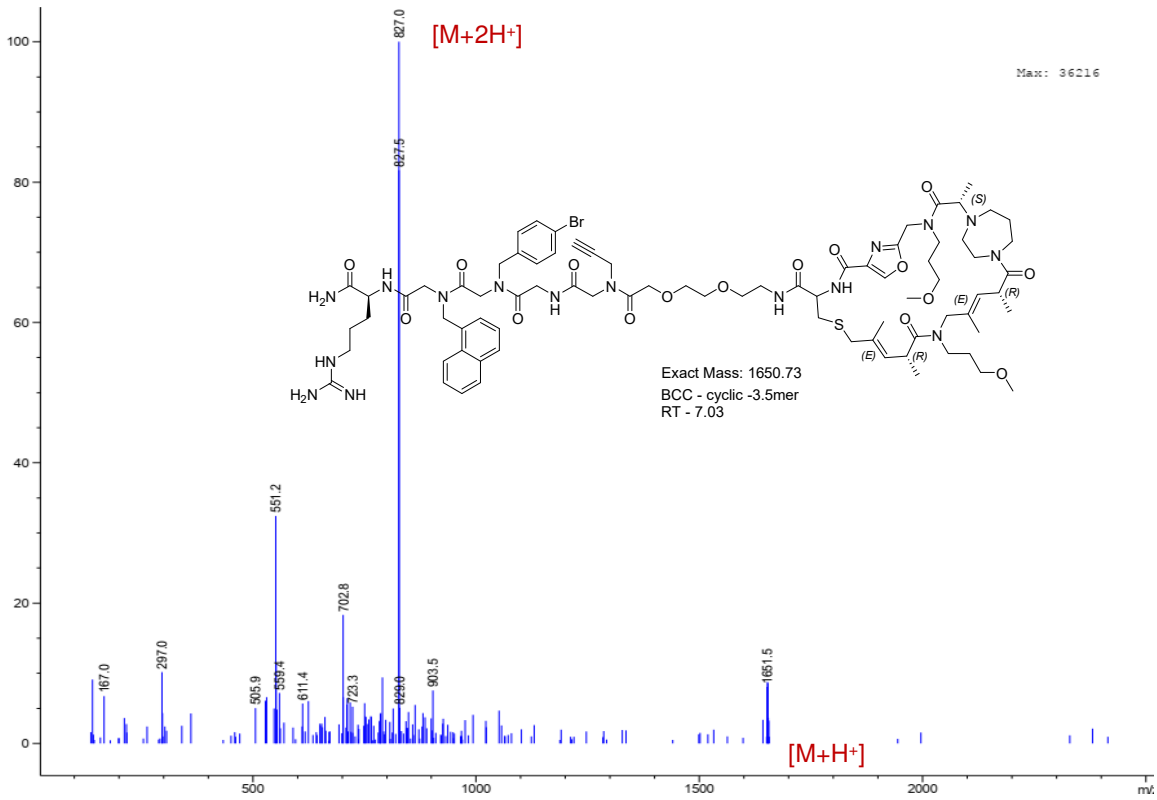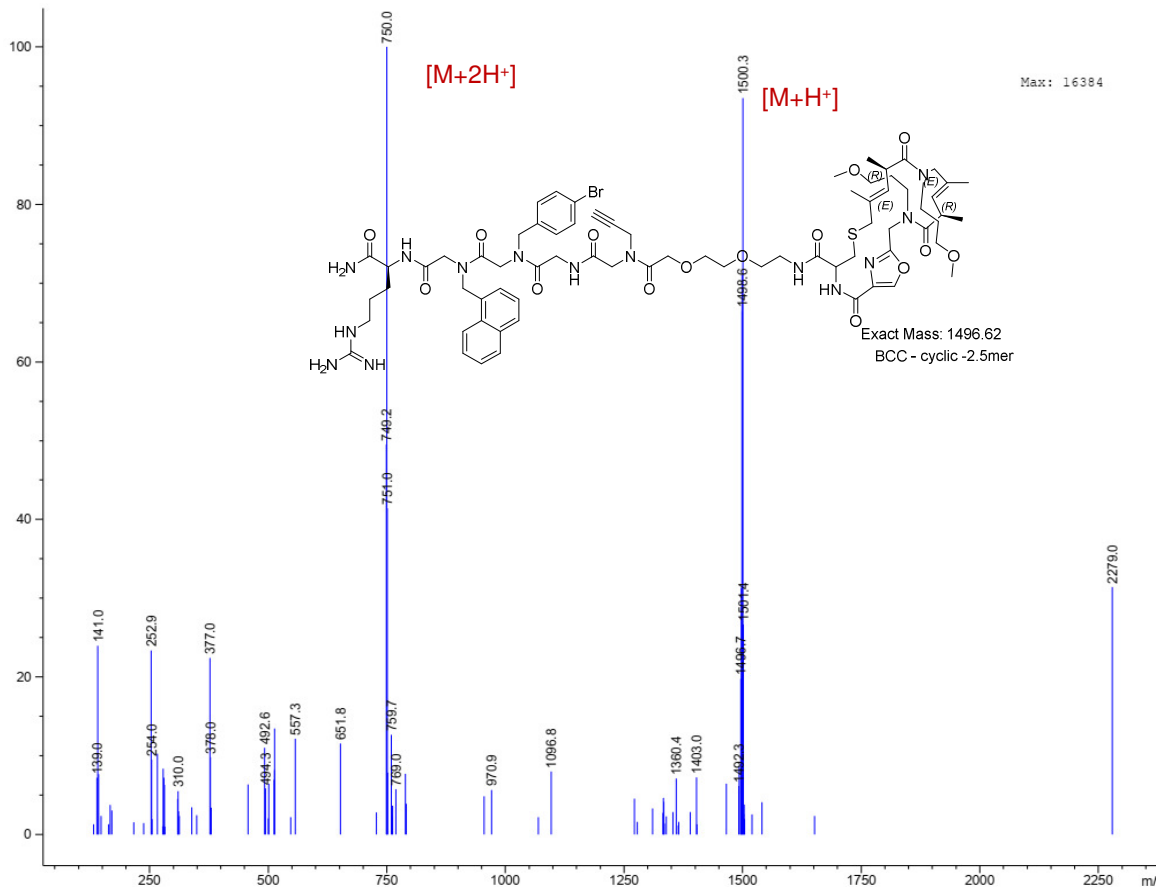

**P10-[BDC]:** Incomplete cyclization was detected on 10  $\mu\text{m}$  but was complete on 160  $\mu\text{m}$  beads.

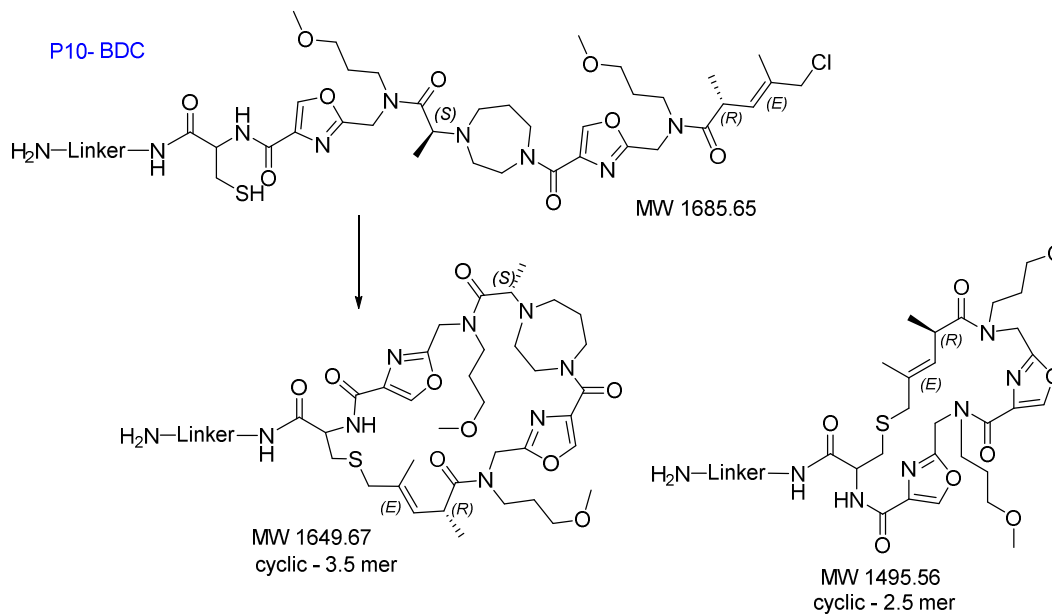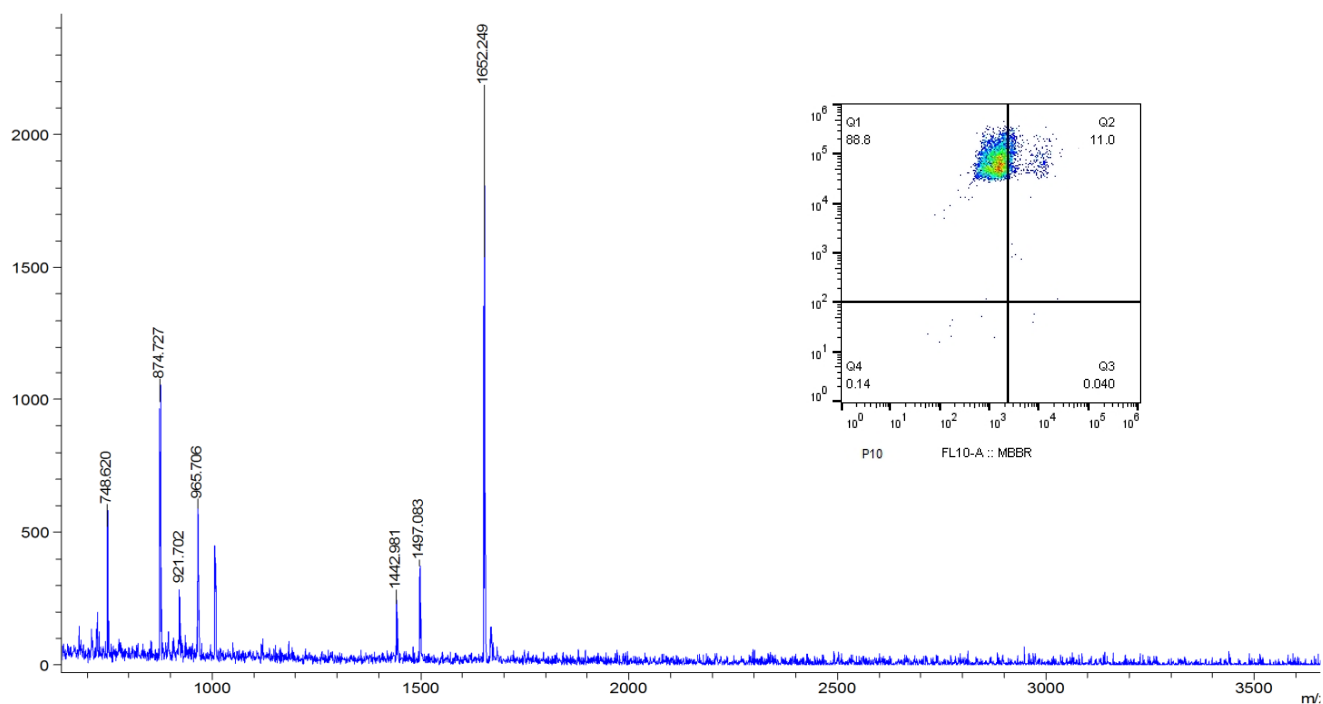



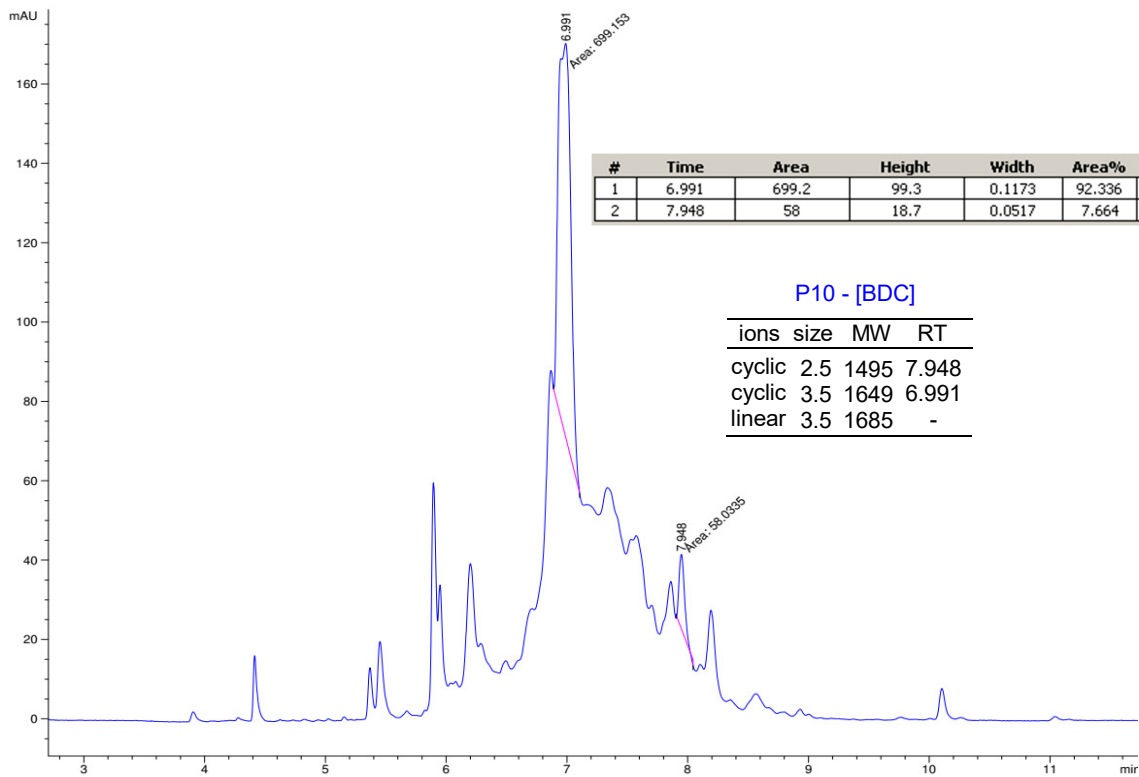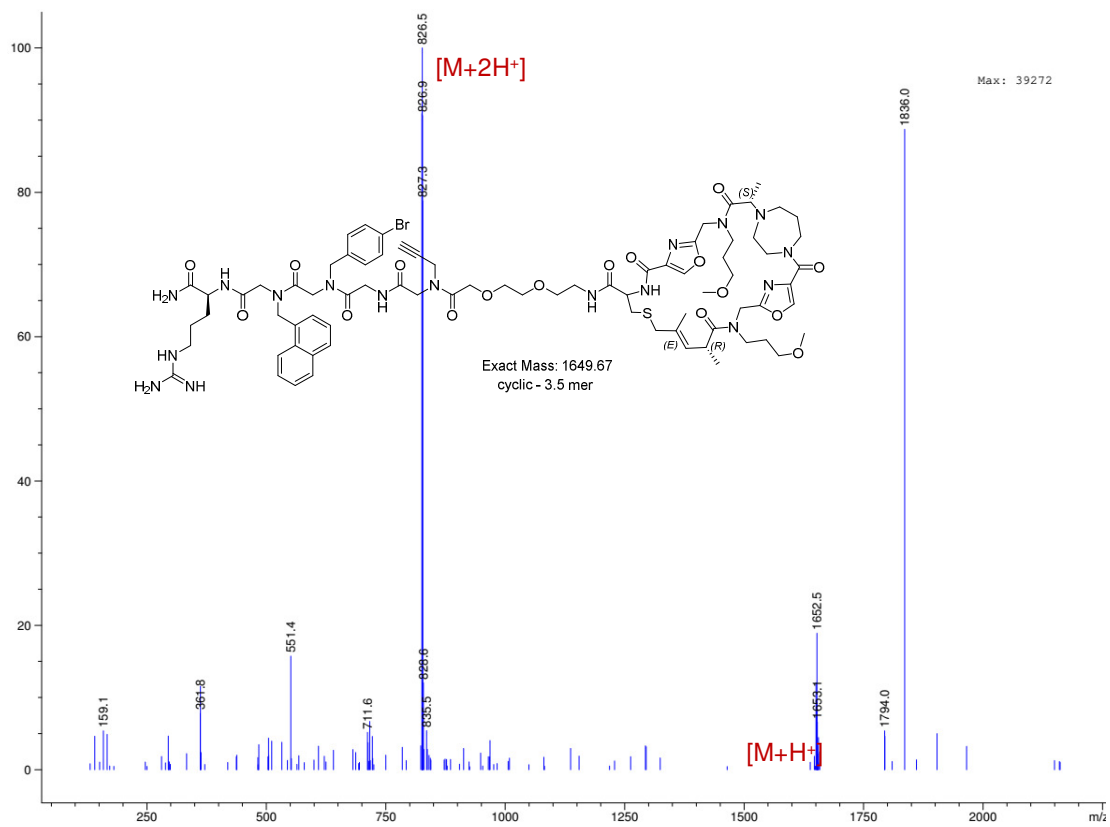

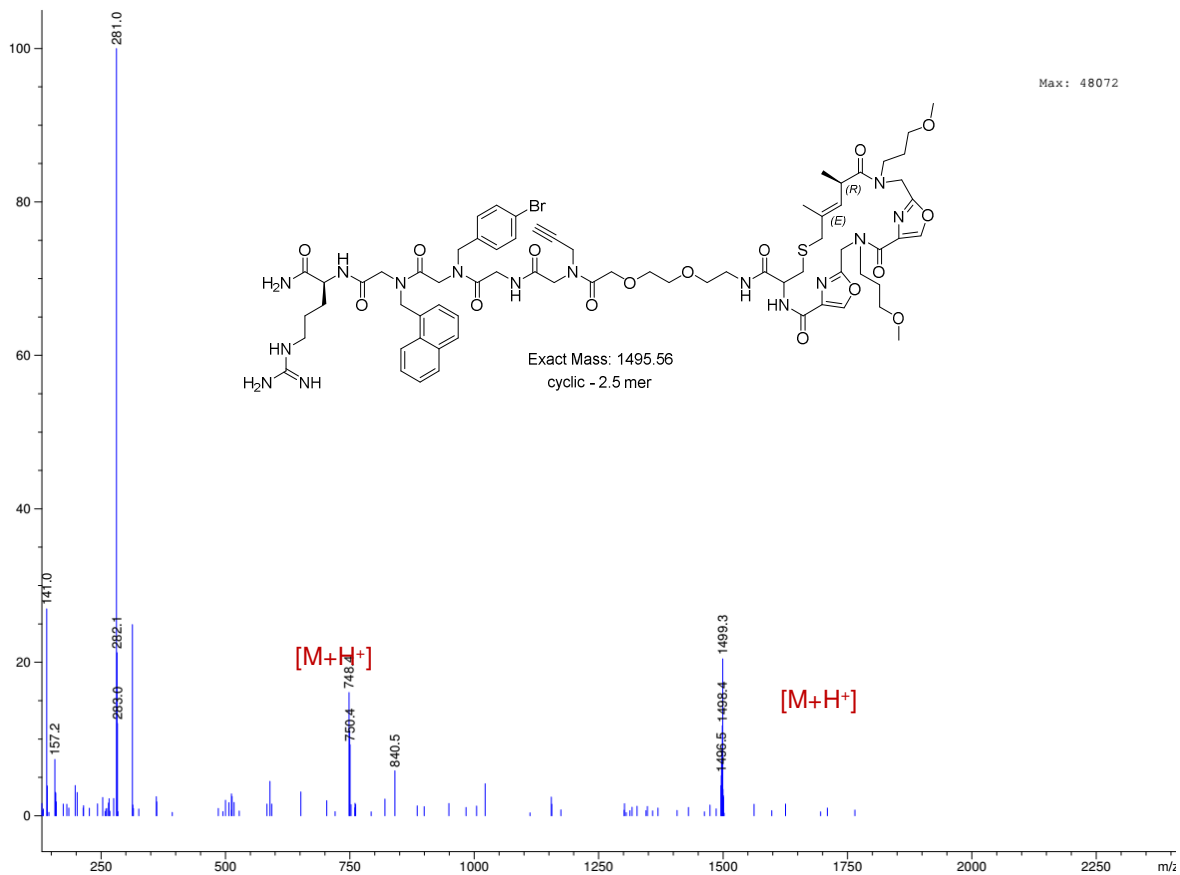

**Q1-[CAD]:** Cyclization was complete on both 10  $\mu\text{m}$  & 160  $\mu\text{m}$  beads.

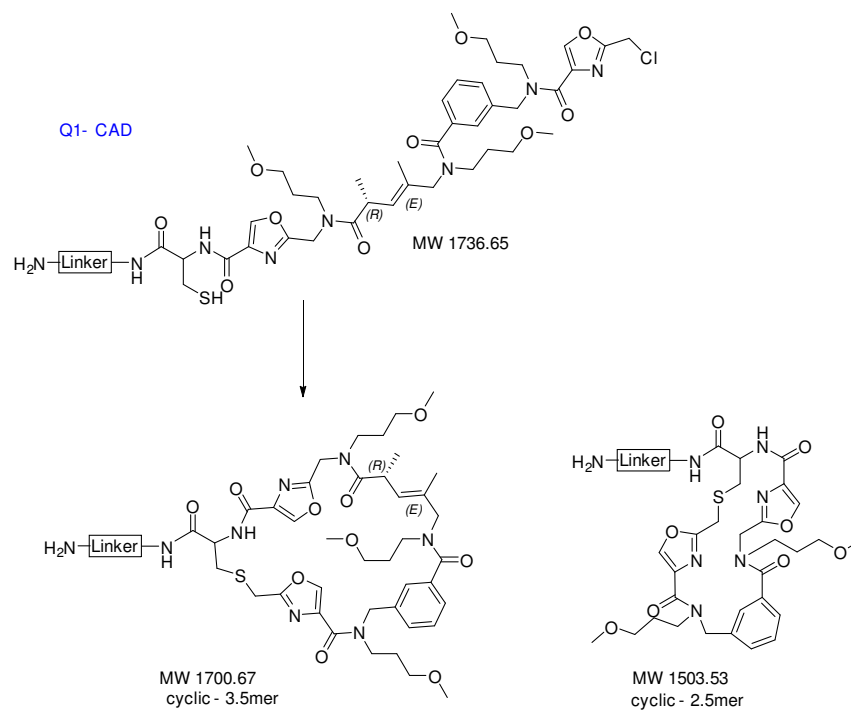

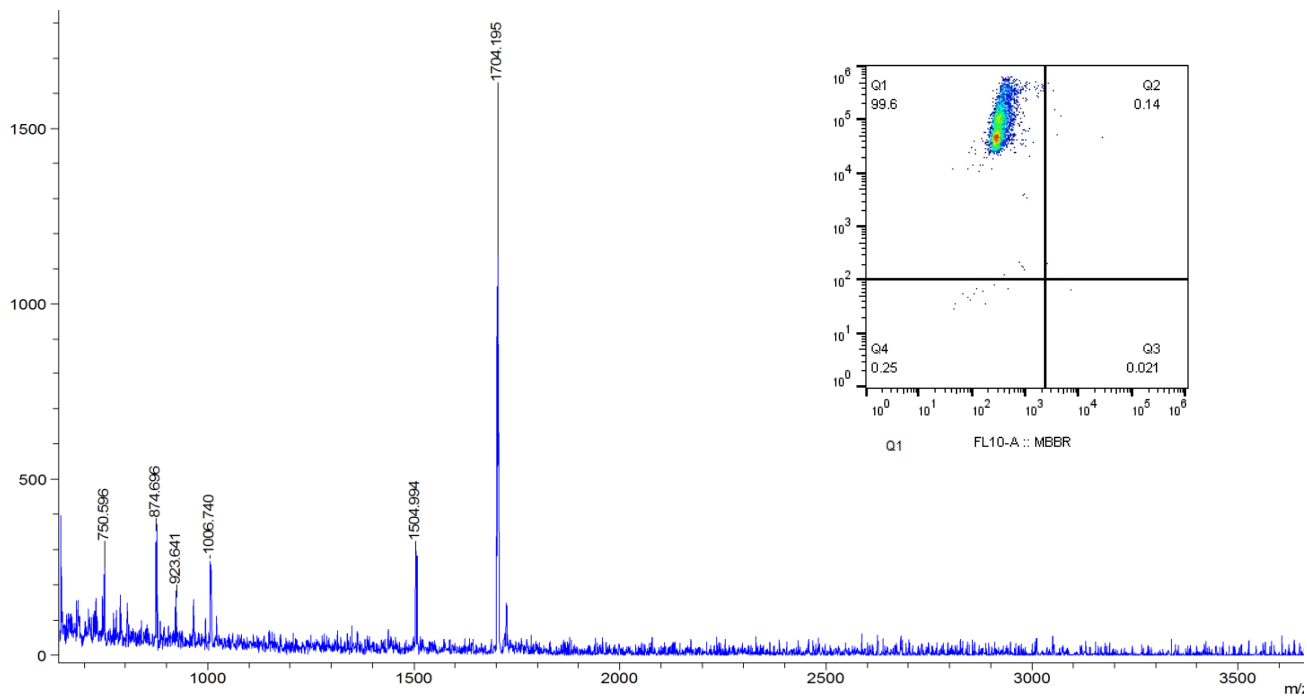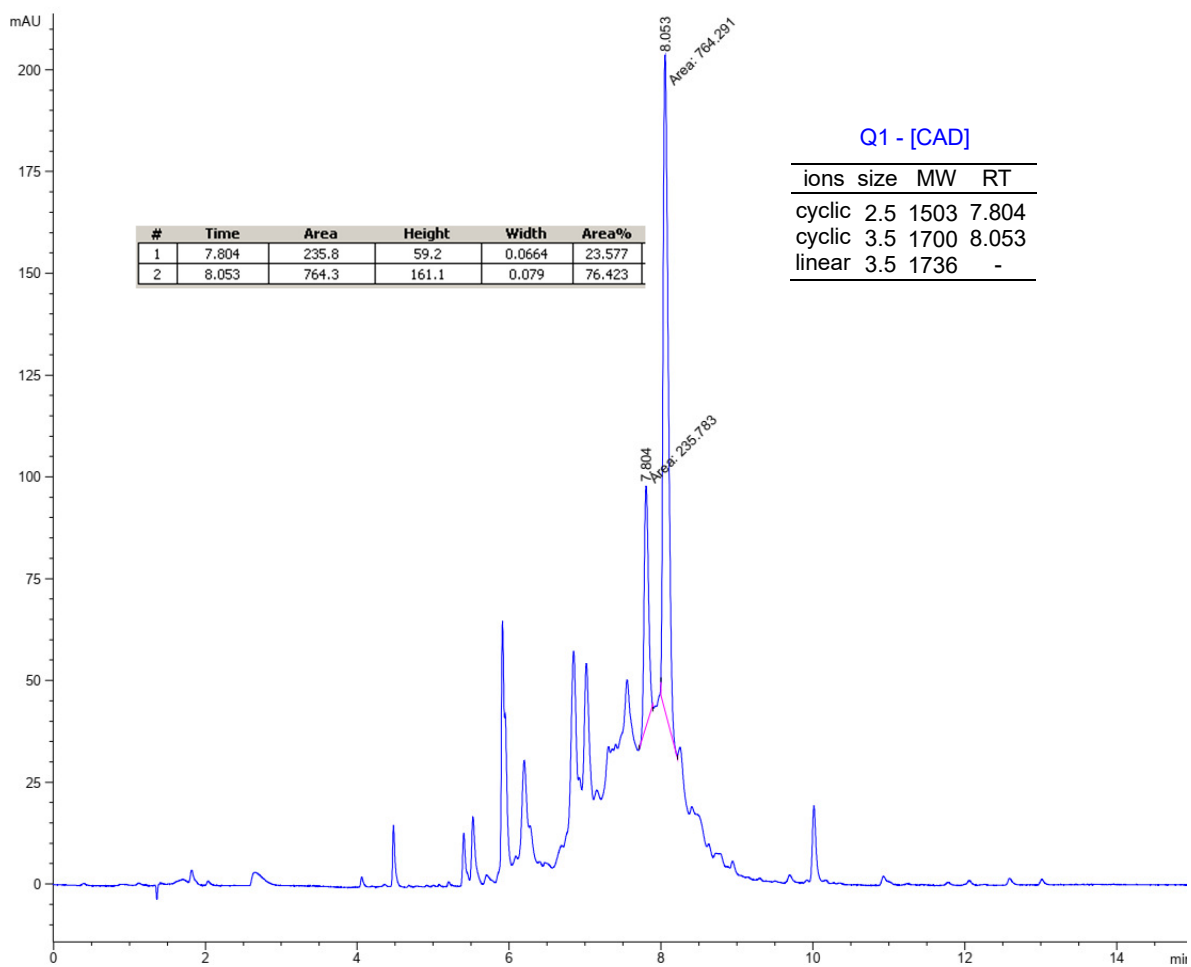

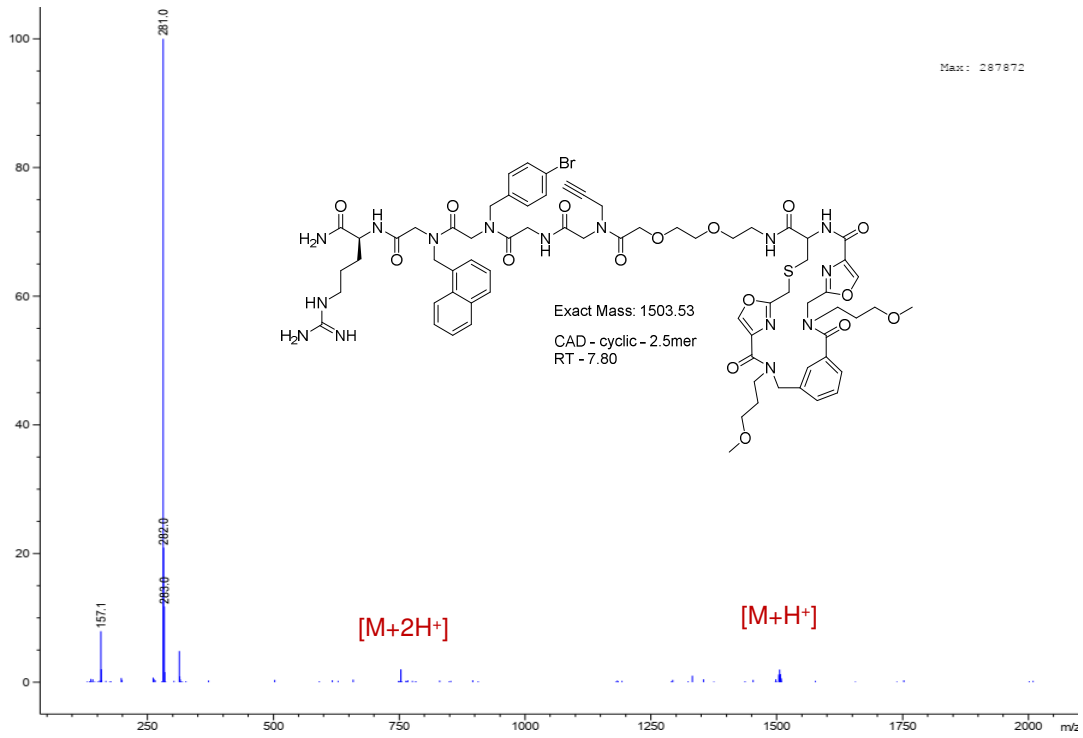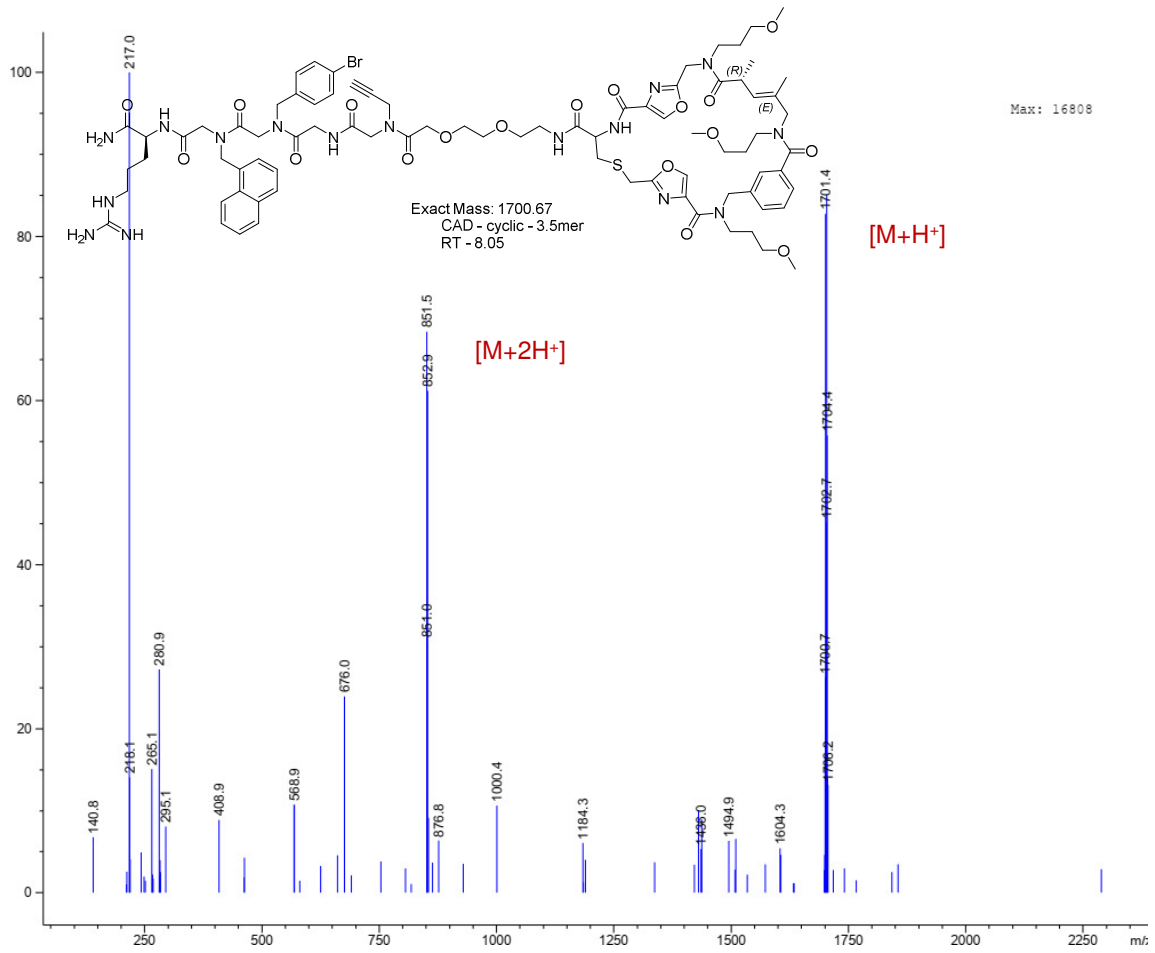

**Q2-[CBD]:** Cyclization was complete on both 10  $\mu\text{m}$  & 160  $\mu\text{m}$  beads.

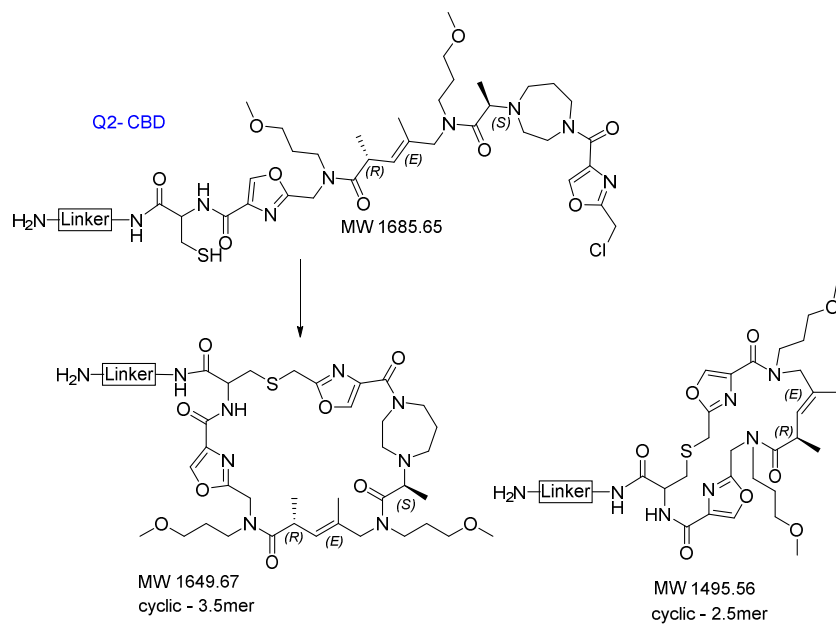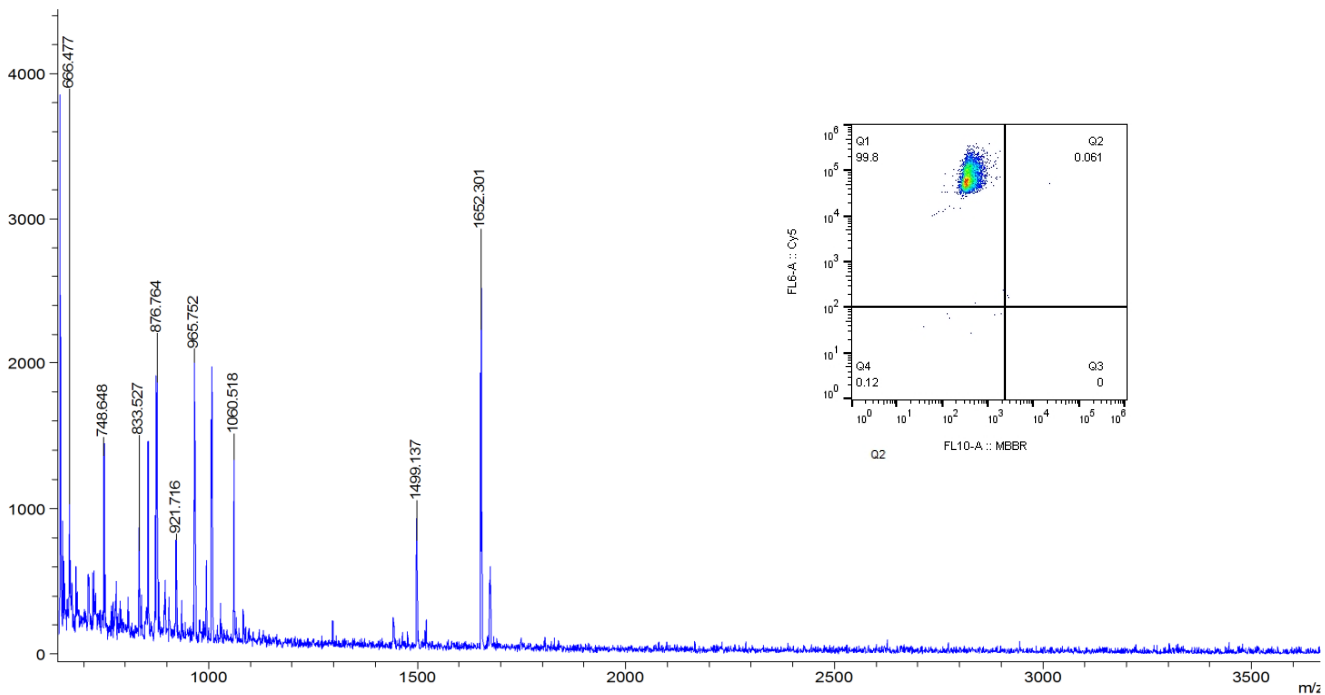

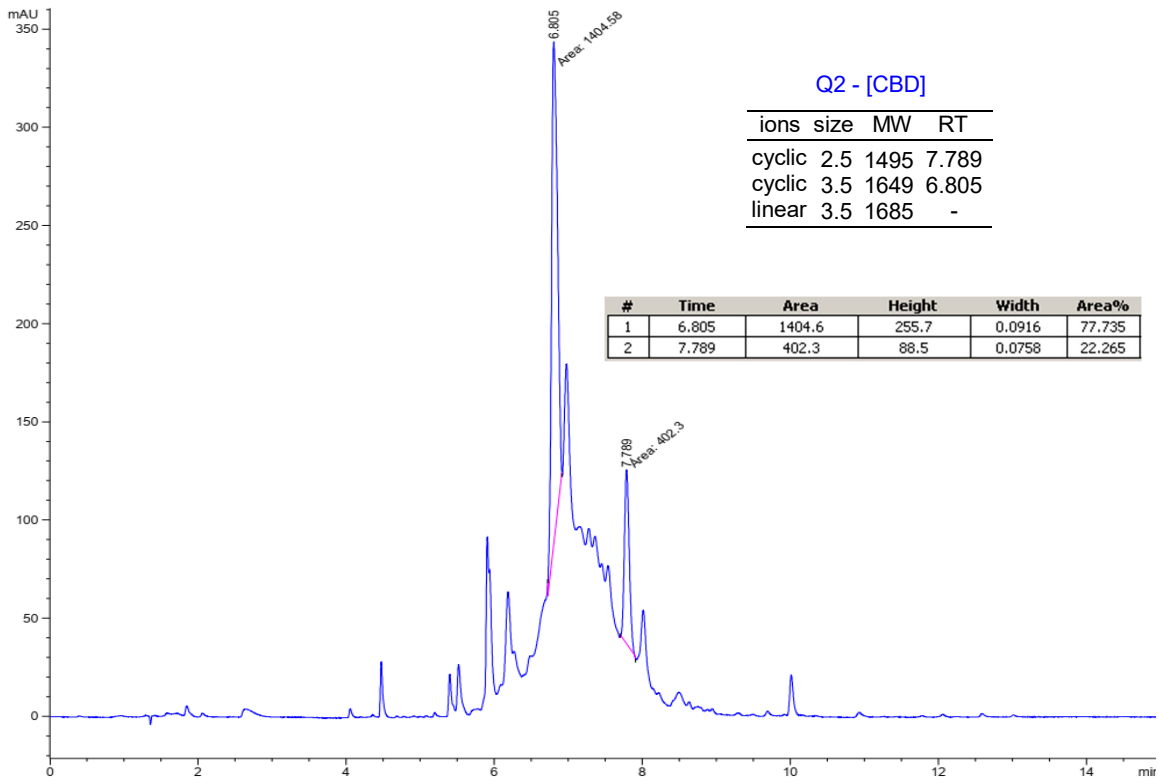

Q2 - [CBD]

| ions   | size | MW   | RT    |
|--------|------|------|-------|
| cyclic | 2.5  | 1495 | 7.789 |
| cyclic | 3.5  | 1649 | 6.805 |
| linear | 3.5  | 1685 | -     |

| # | Time  | Area   | Height | Width  | Area%  |
|---|-------|--------|--------|--------|--------|
| 1 | 6.805 | 1404.6 | 255.7  | 0.0916 | 77.735 |
| 2 | 7.789 | 402.3  | 88.5   | 0.0758 | 22.265 |

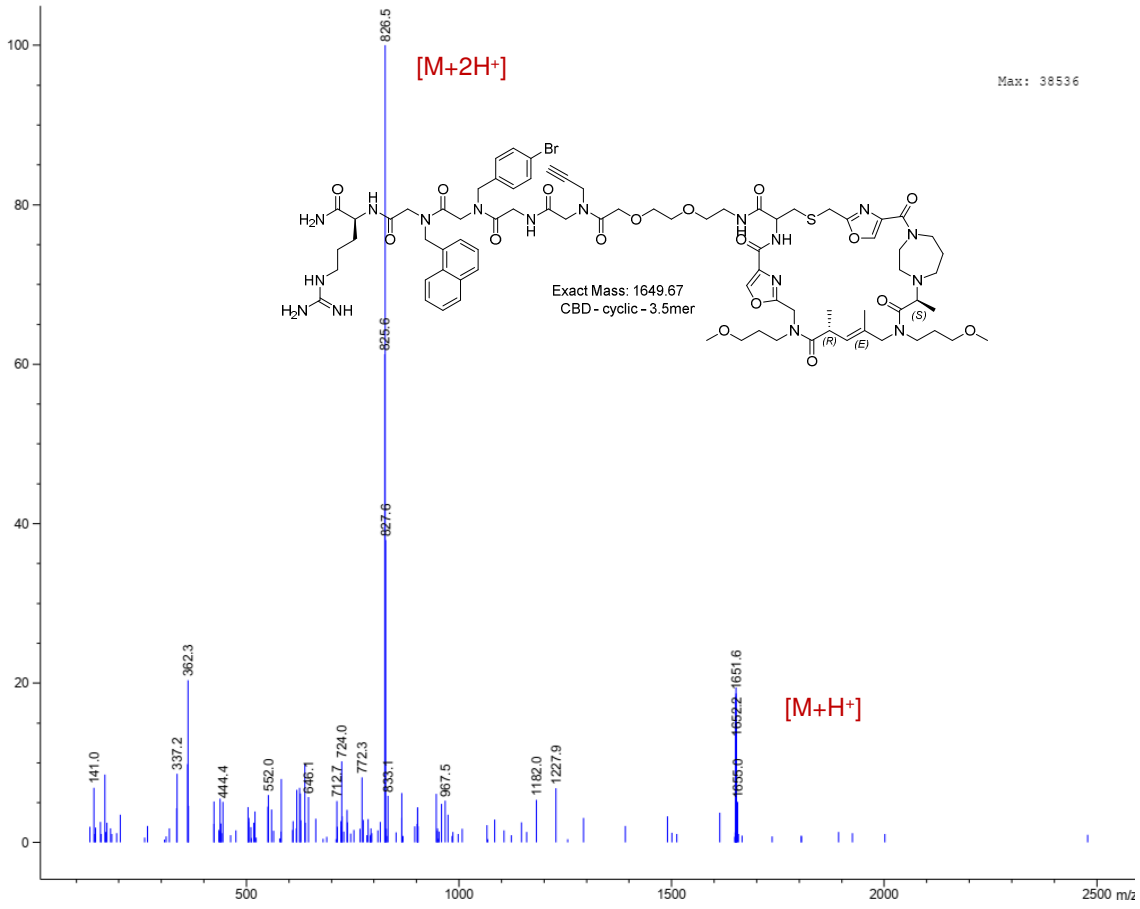

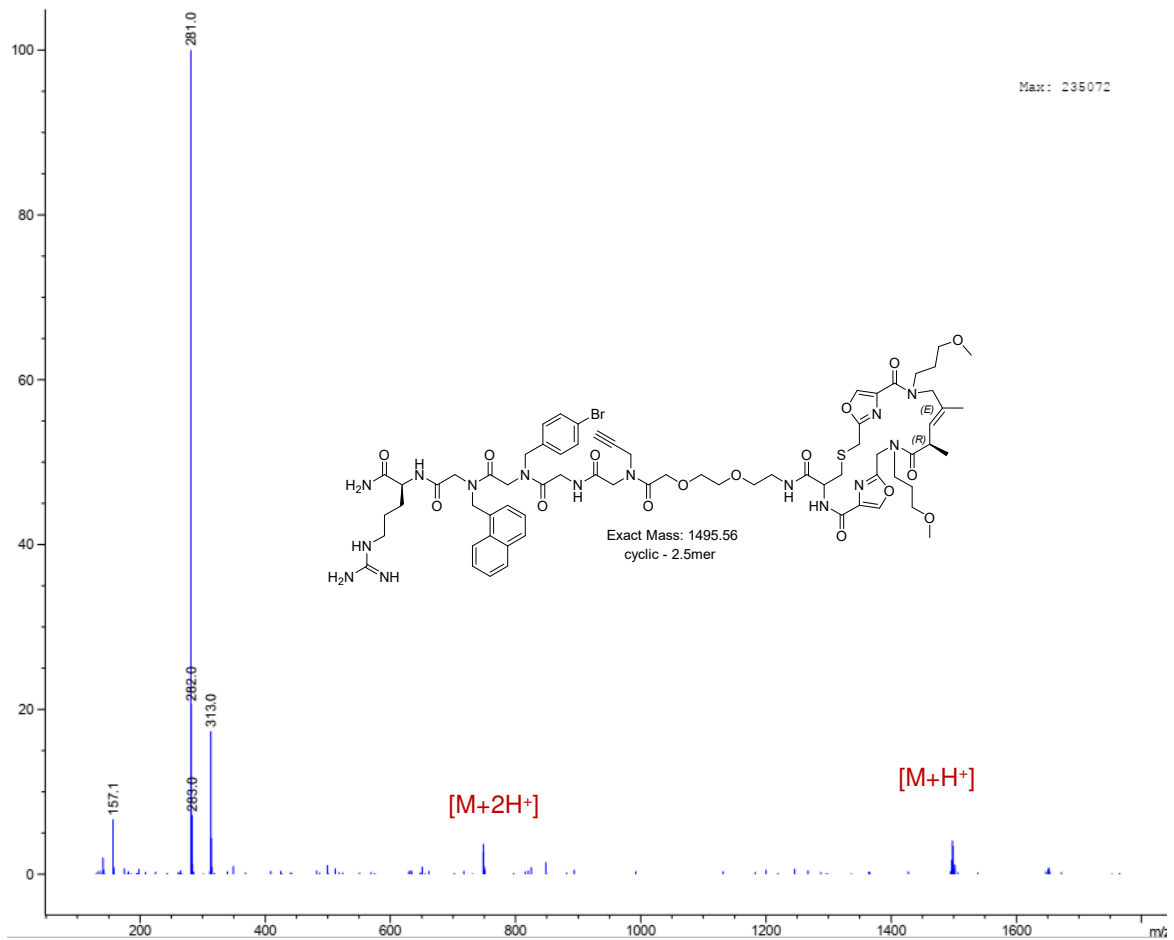

**Q3-[CCD]:** Cyclization was complete on both 10  $\mu\text{m}$  & 160  $\mu\text{m}$  beads.

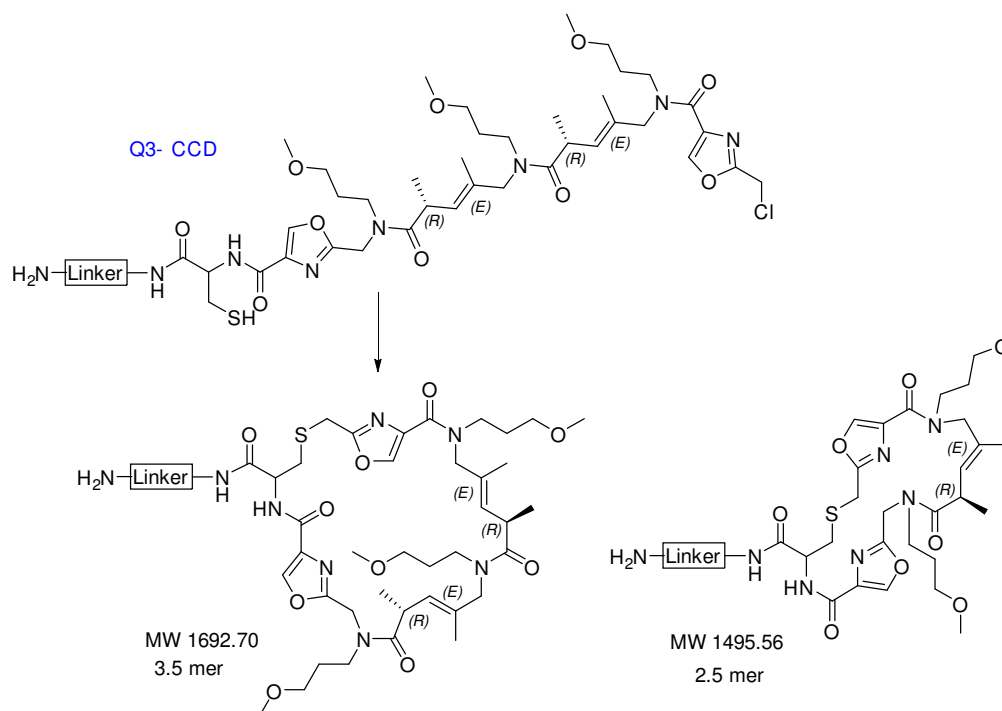

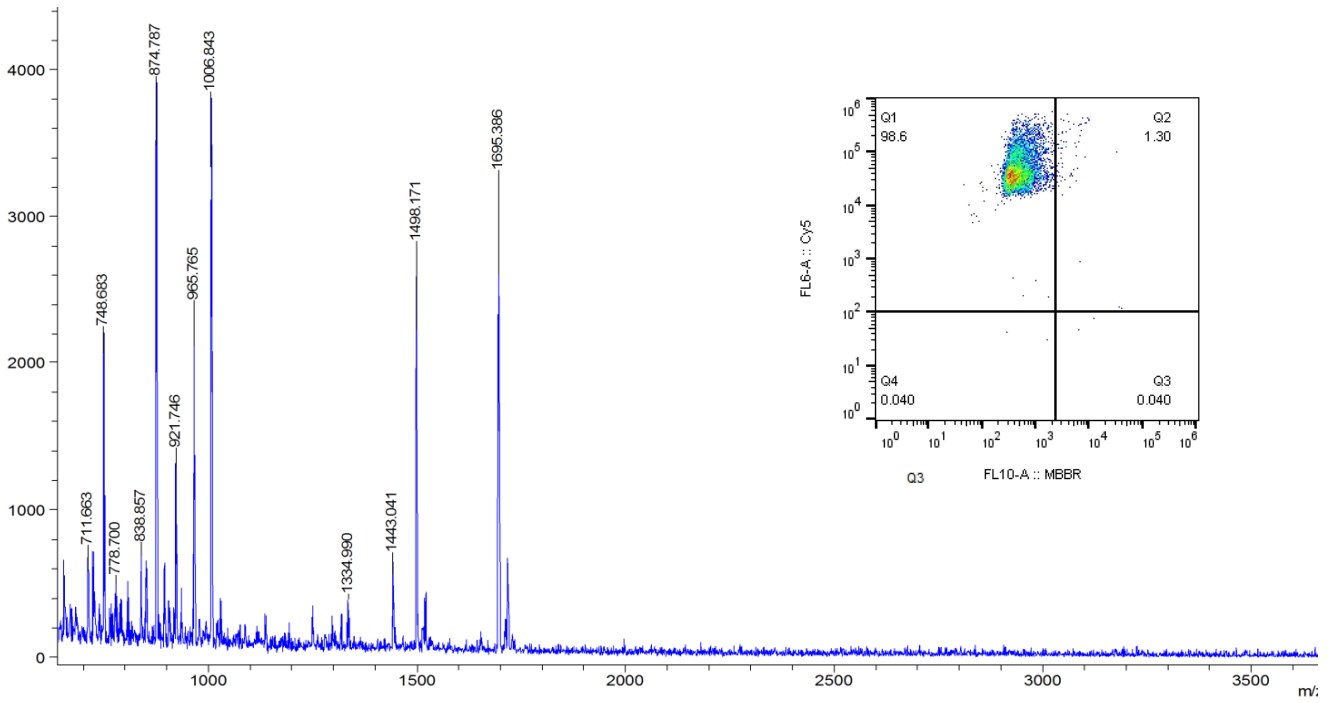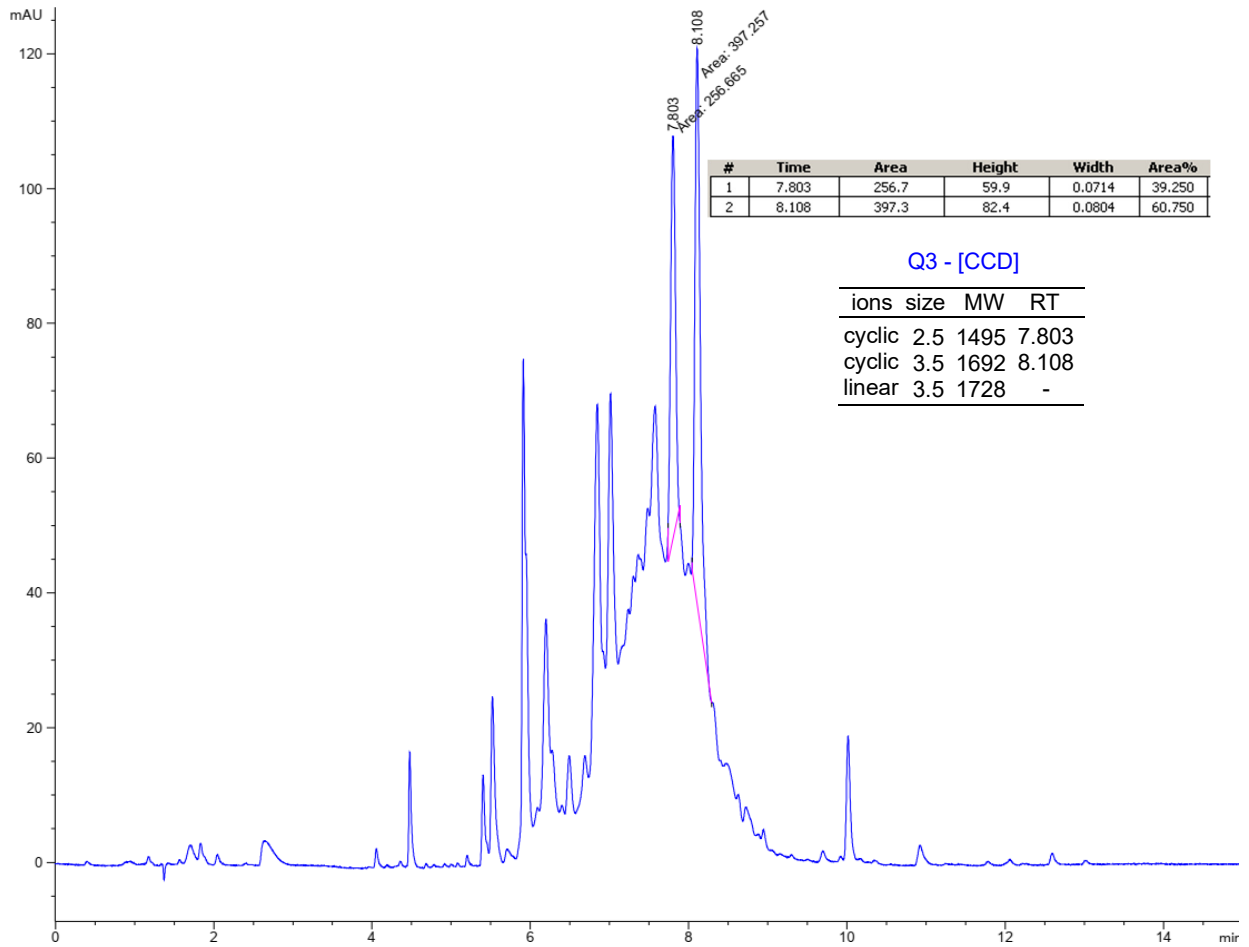



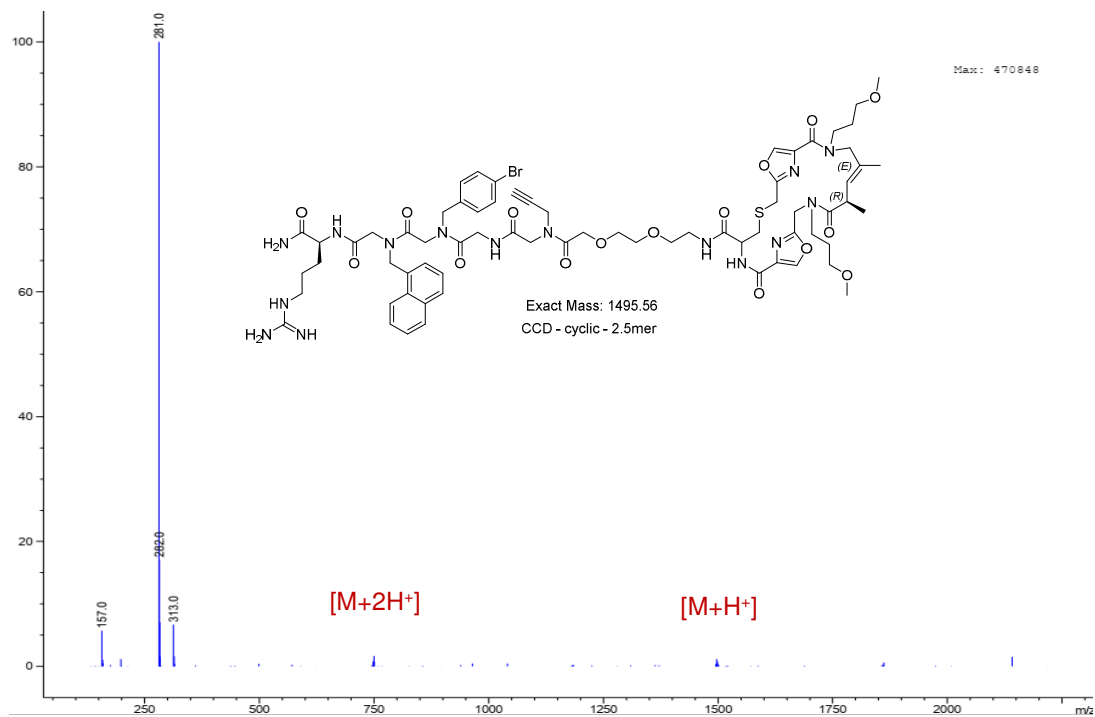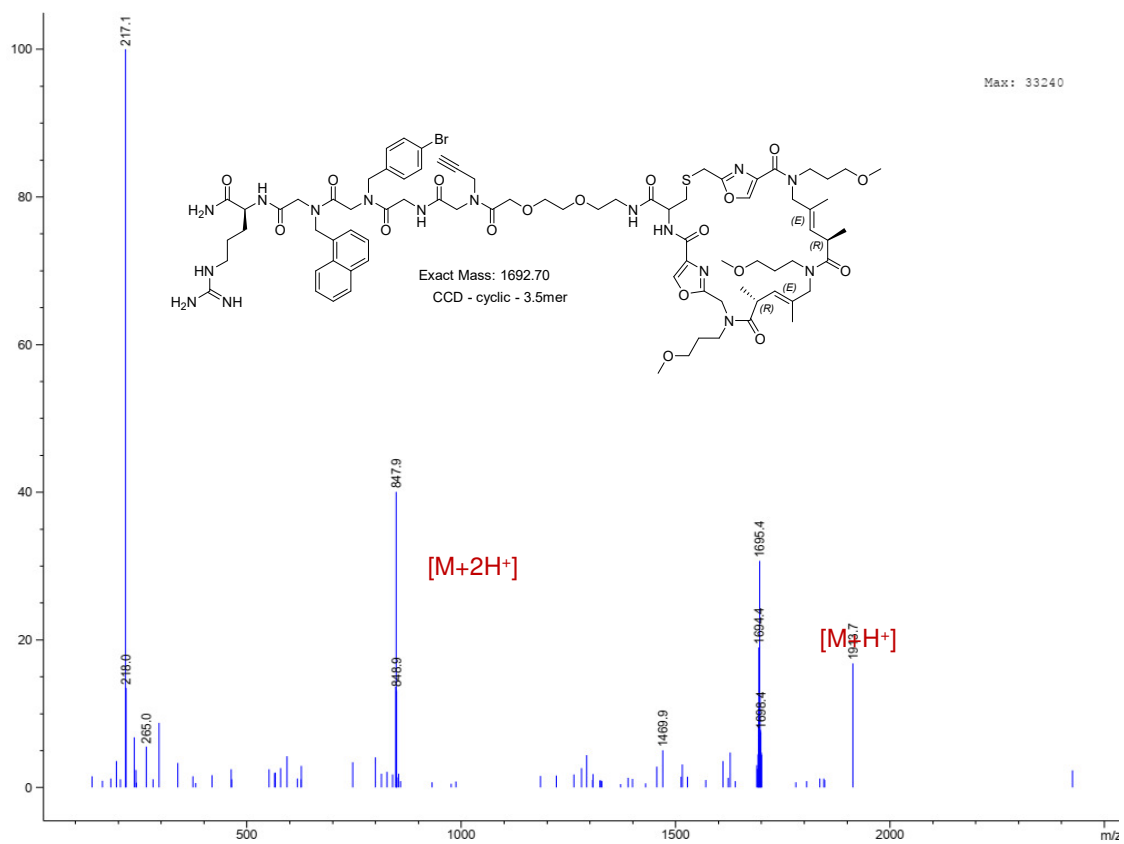

**Q4-[CDD]:** Cyclization was complete on both 10 μm & 160 μm beads.

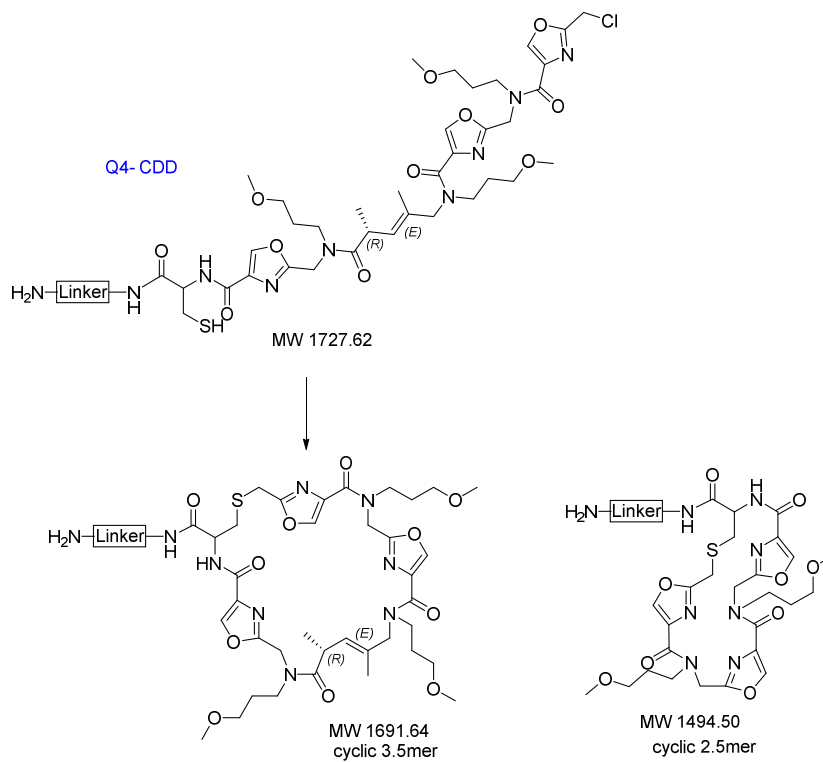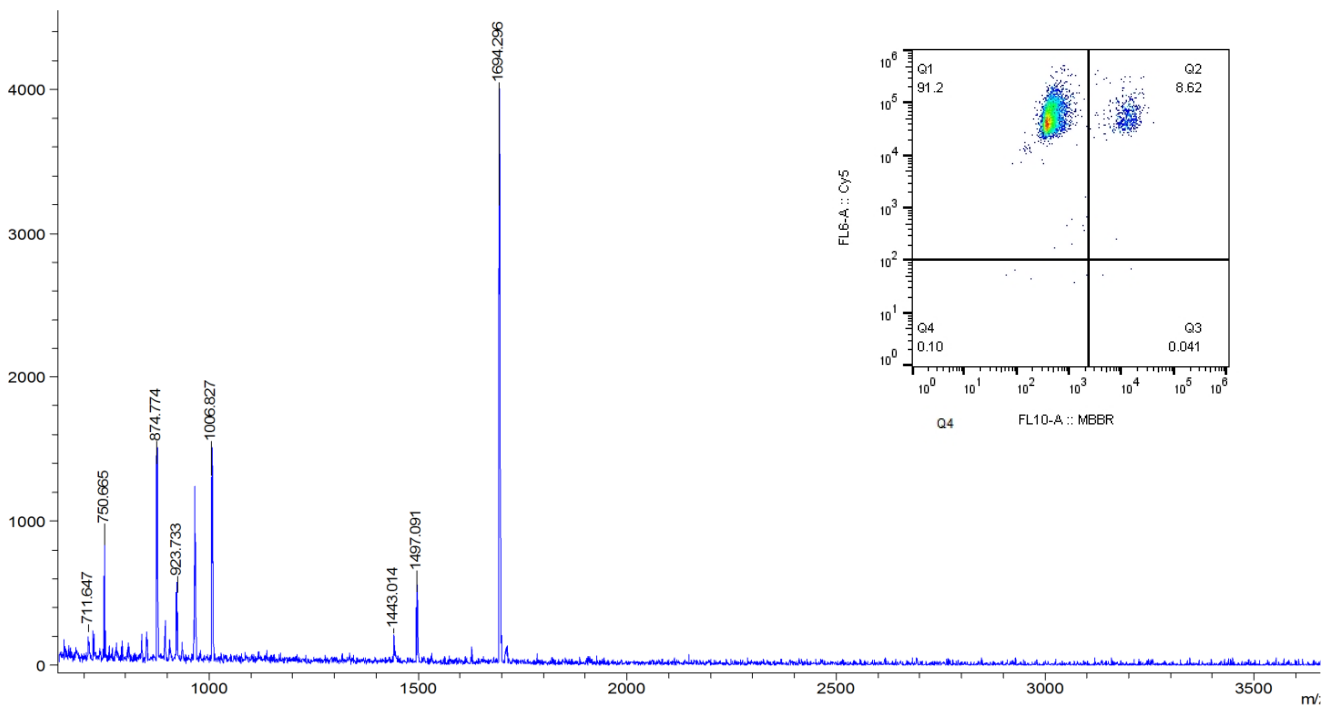

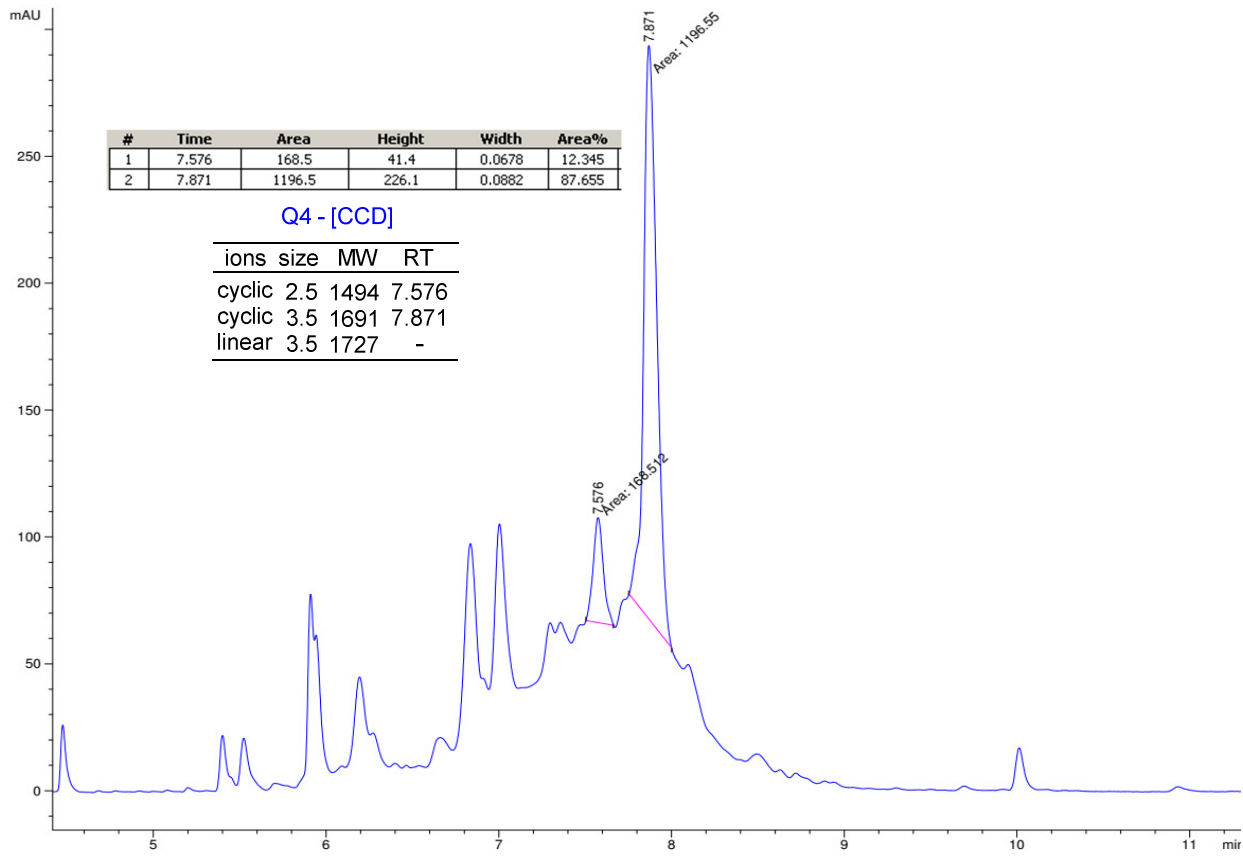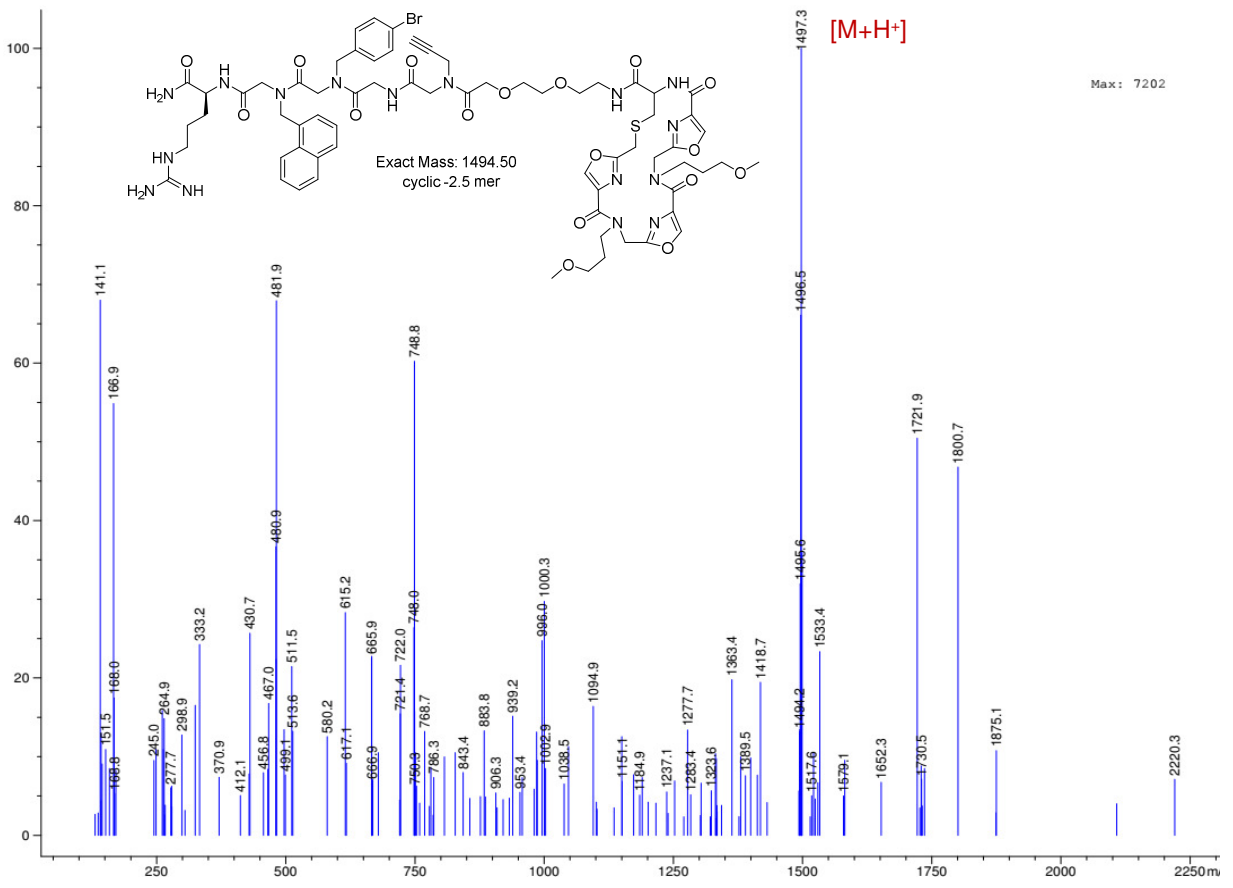



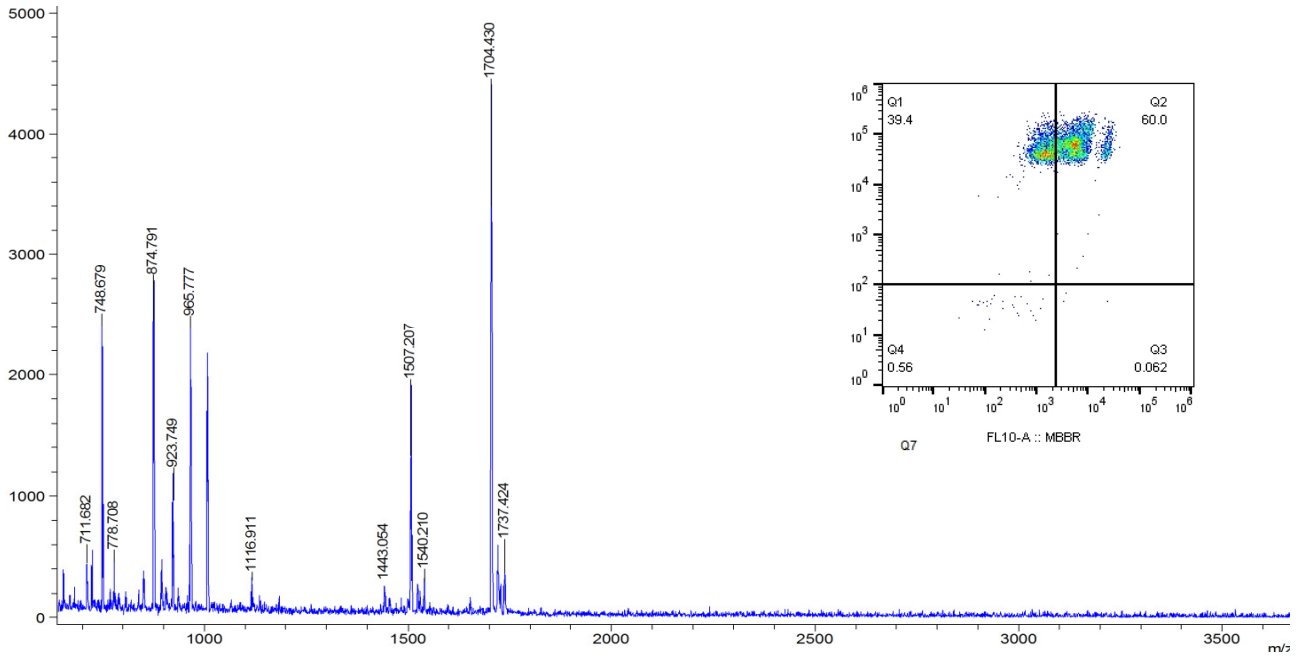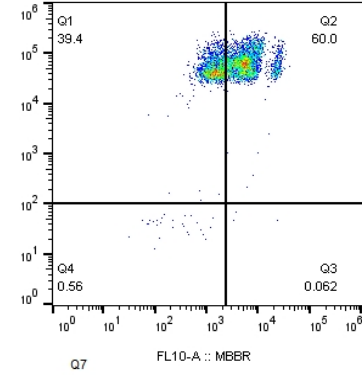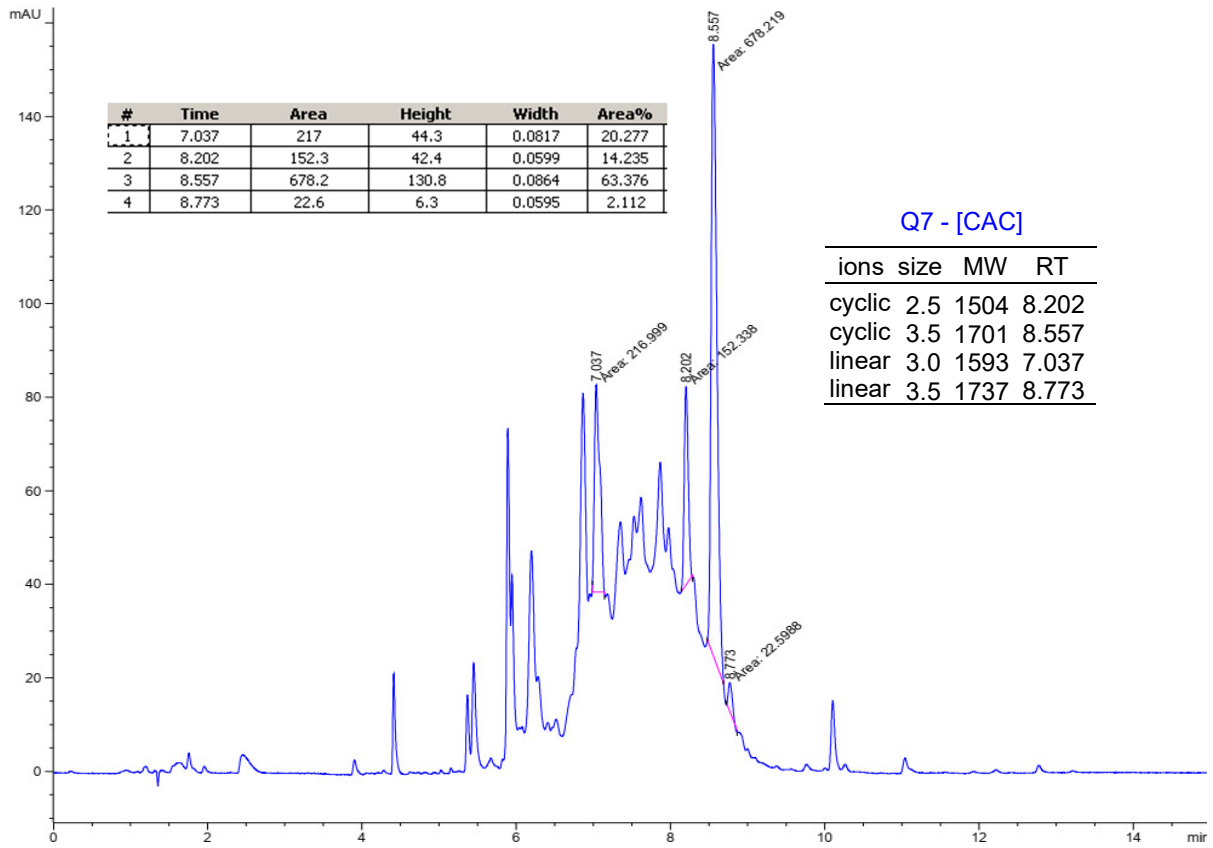

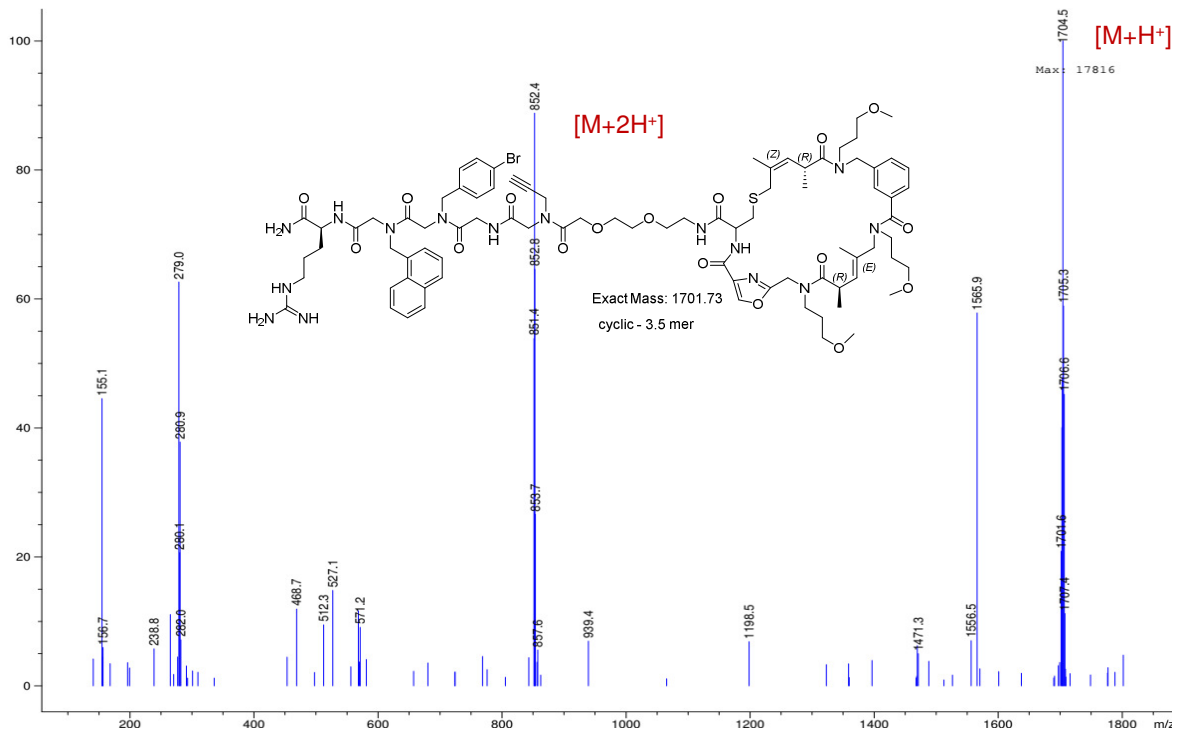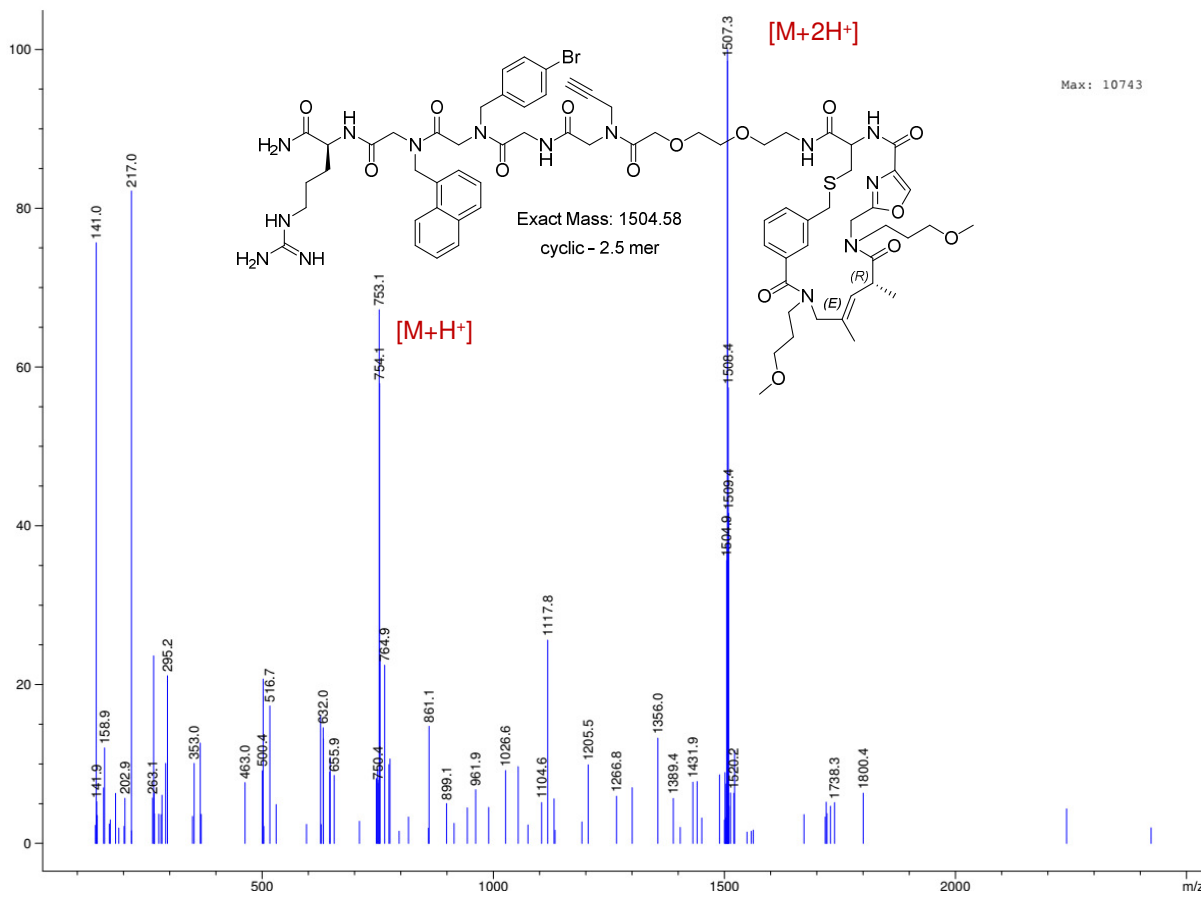

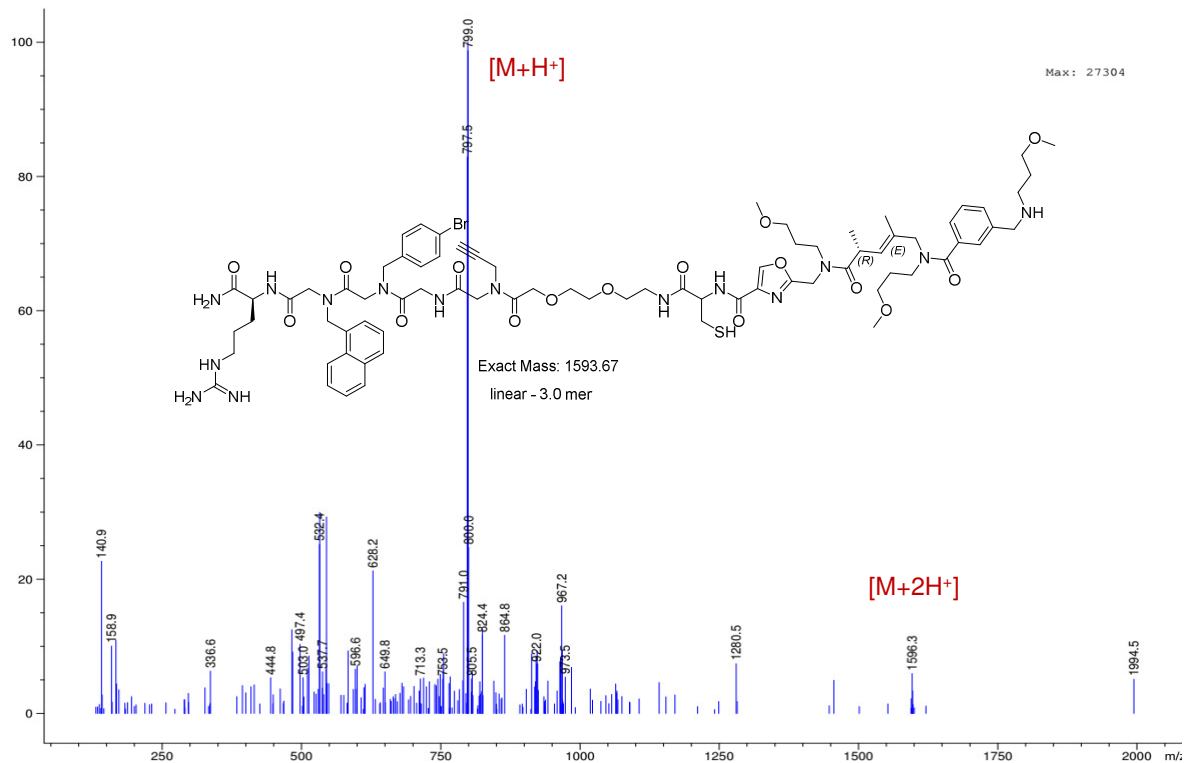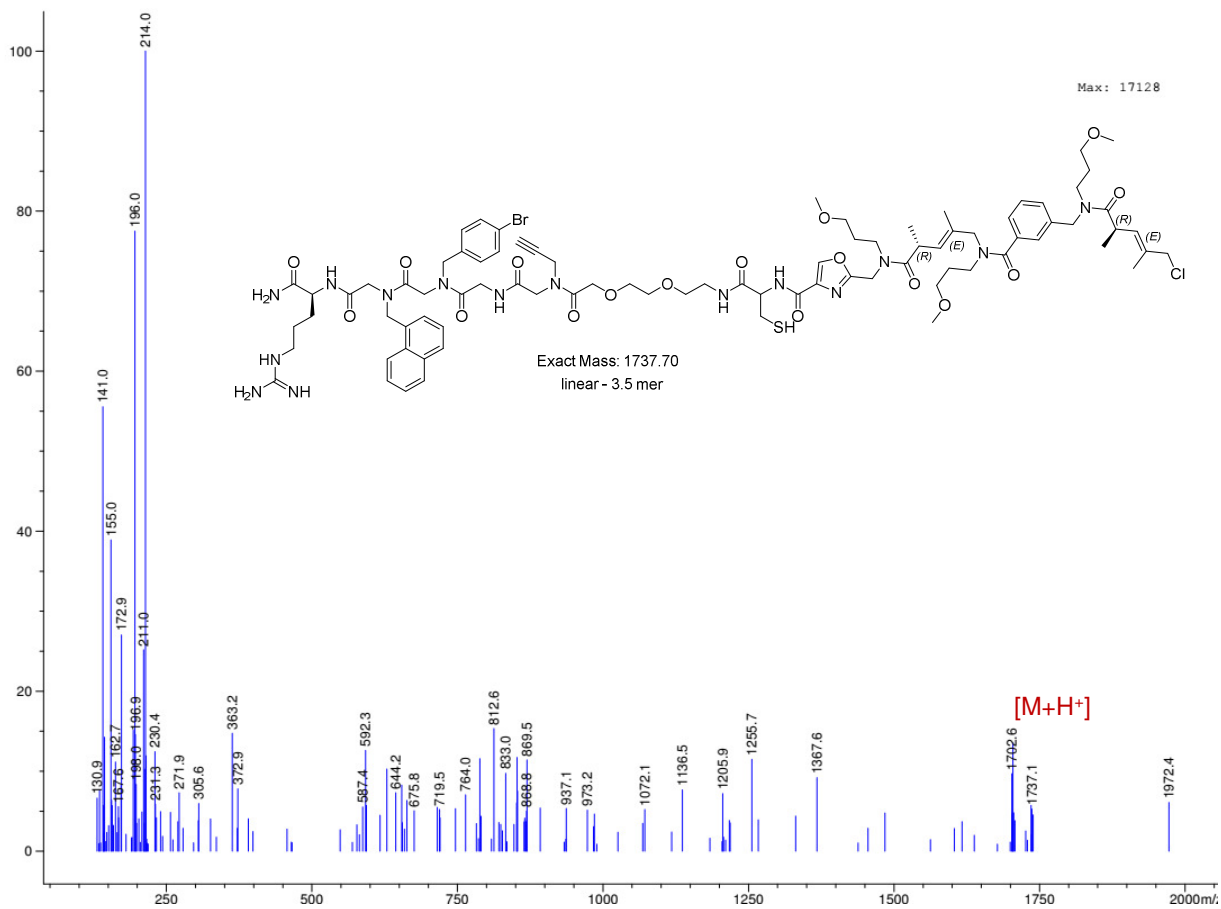

**Q8-[CBC]:** Cyclization was complete on both 10um & 160um. Dead beads could be due to 1.5mer linear fragments (MW 1300).

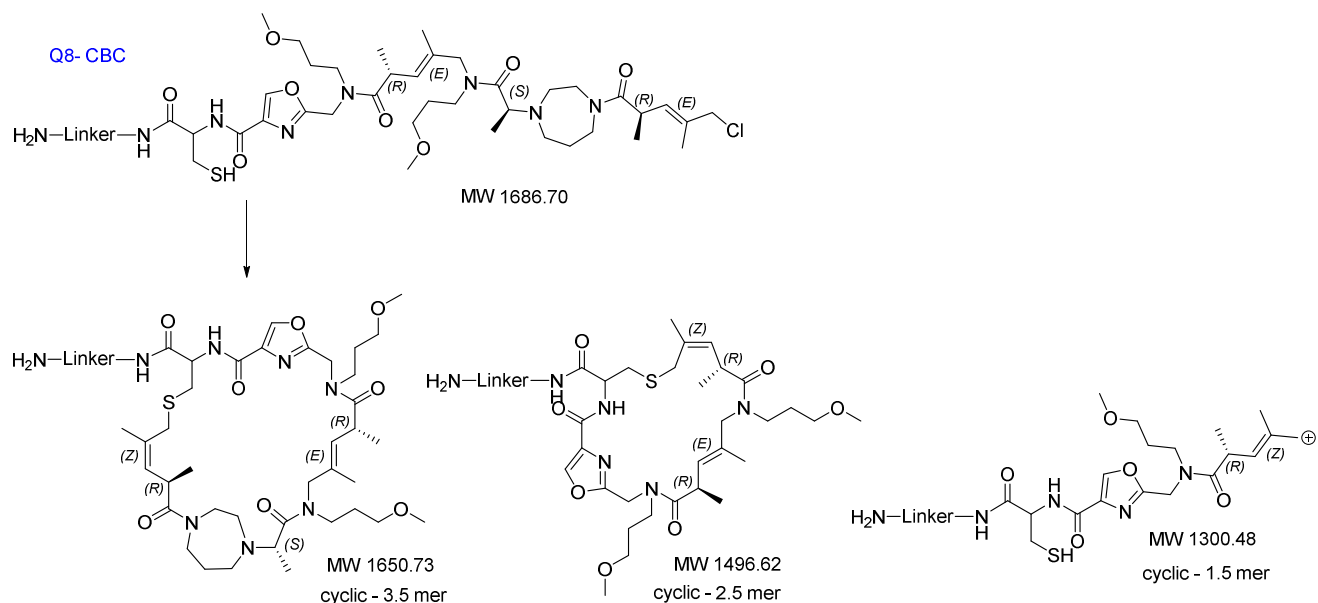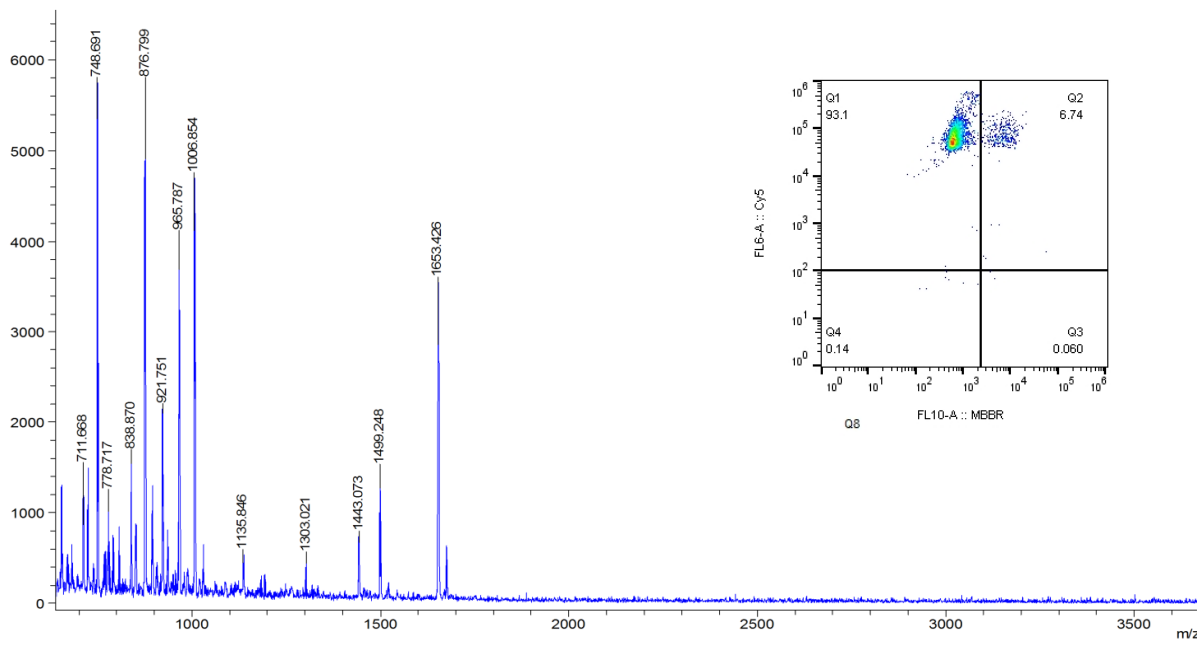



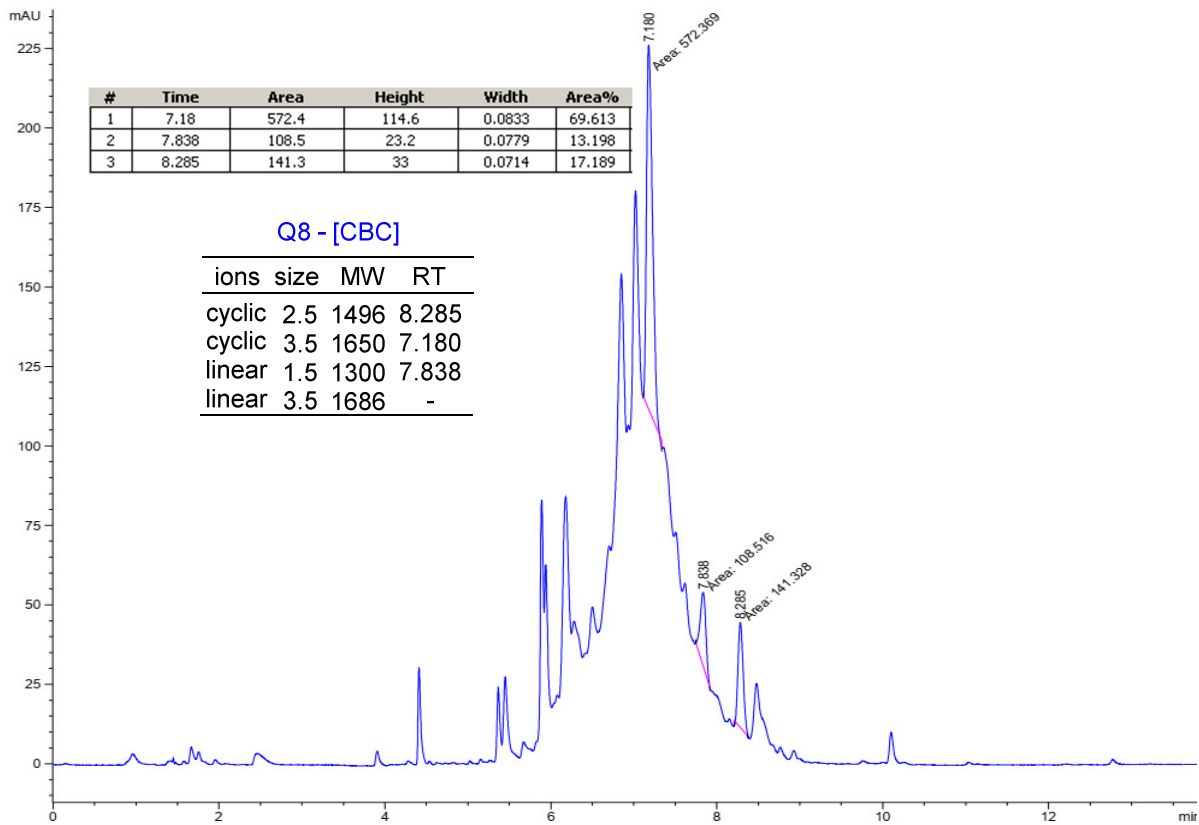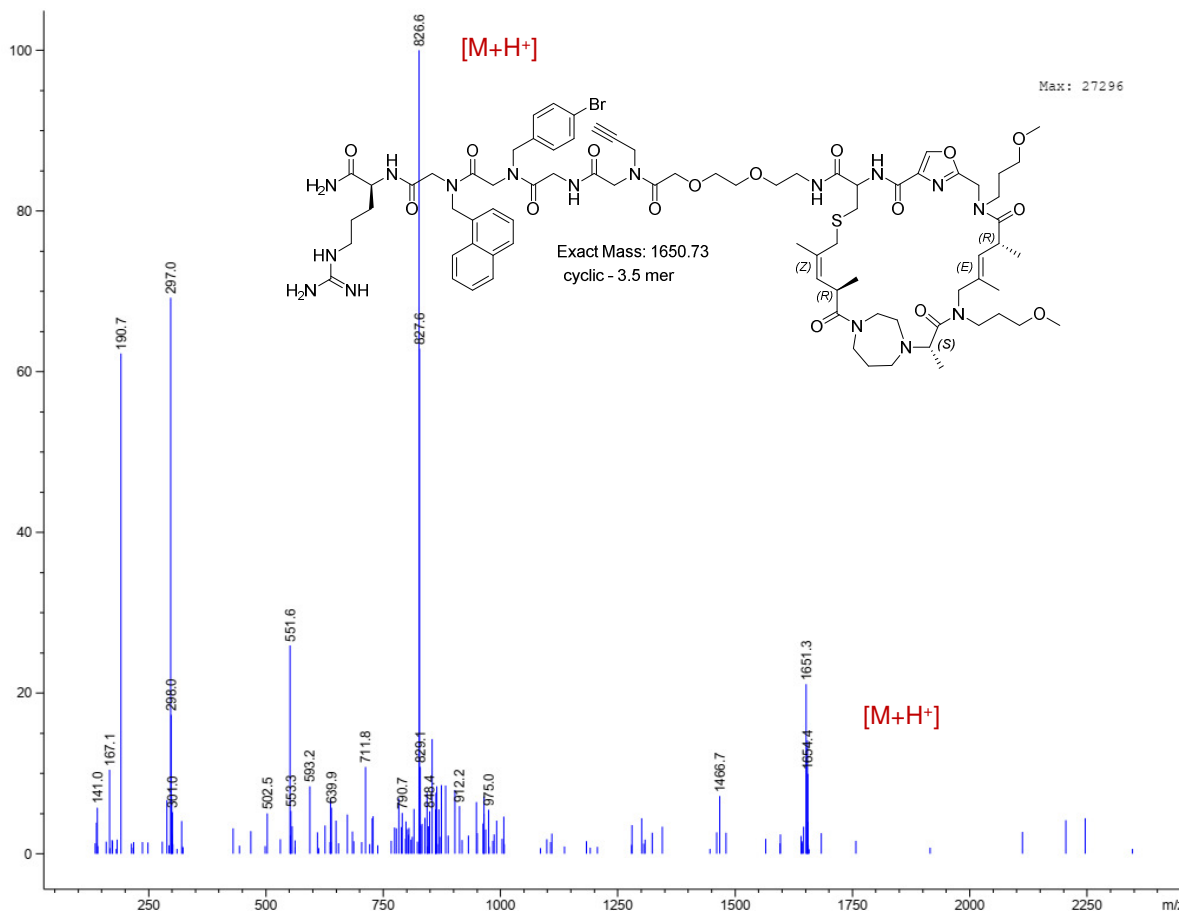

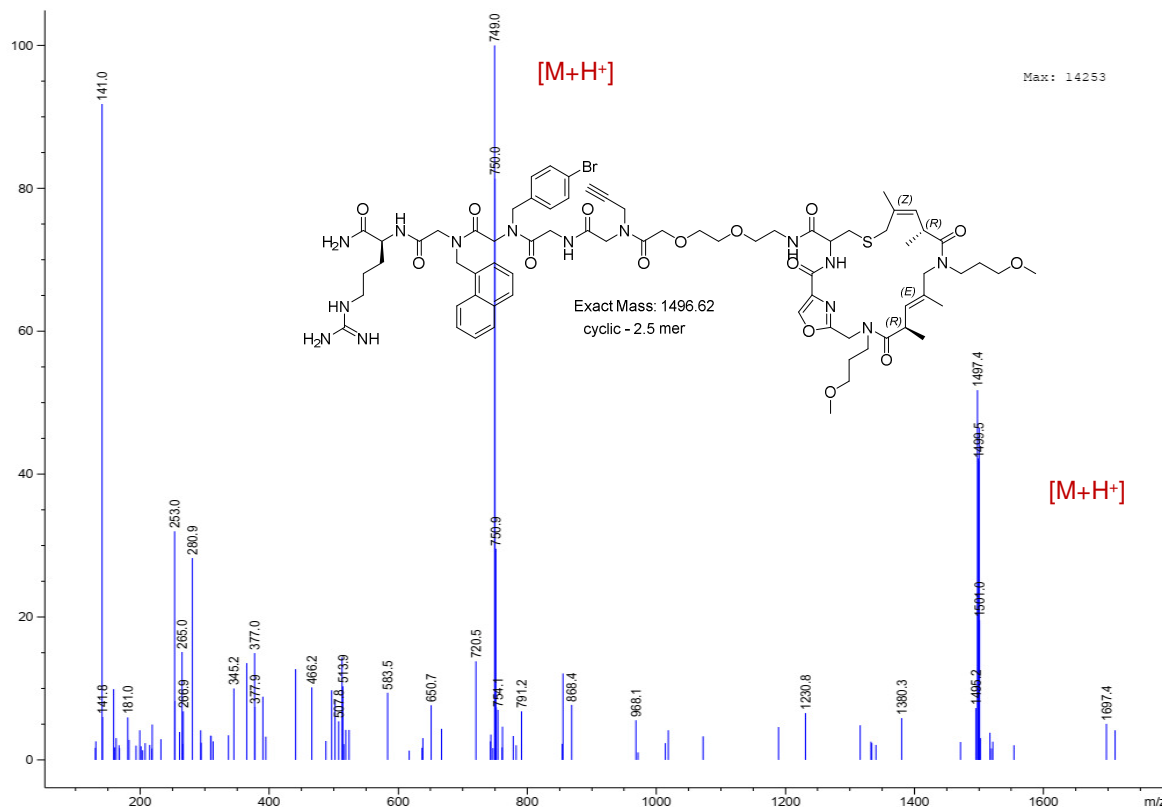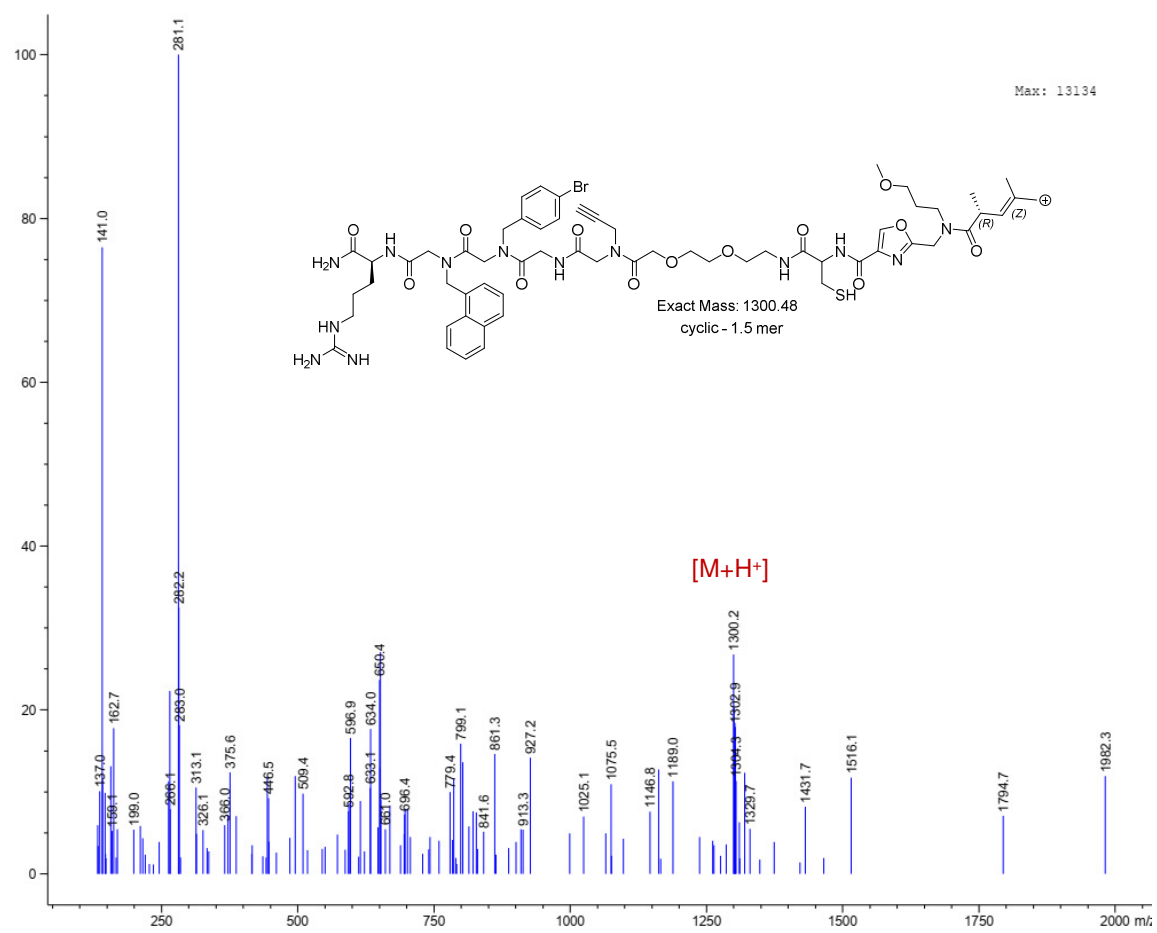

**Q9-[CCC]:** Incomplete cyclization was detected on 10um but was complete on 160um.

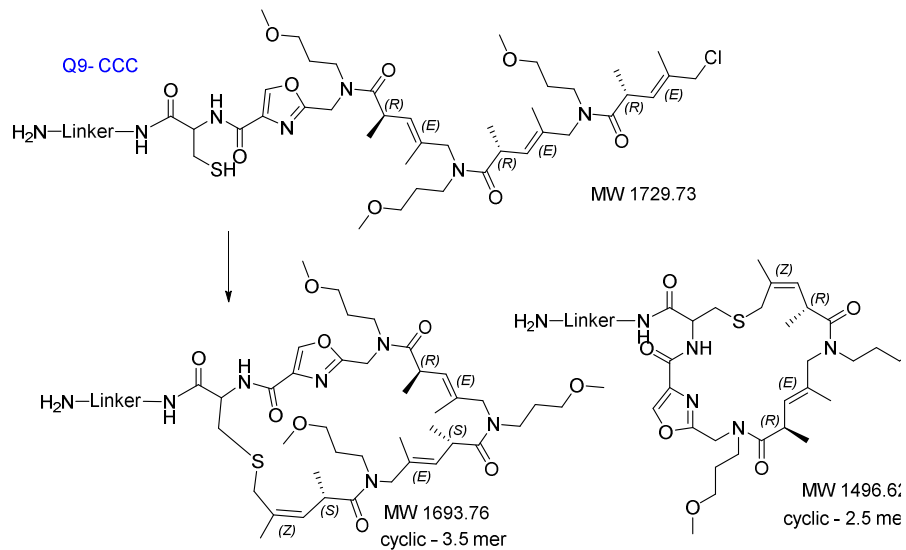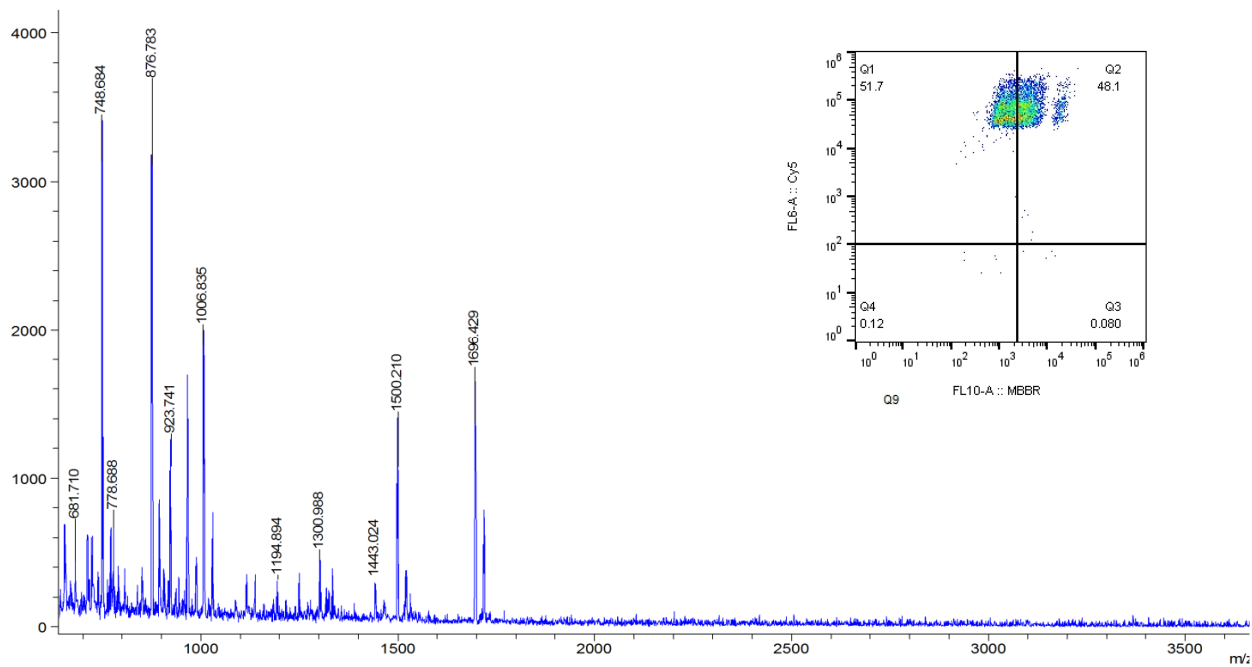

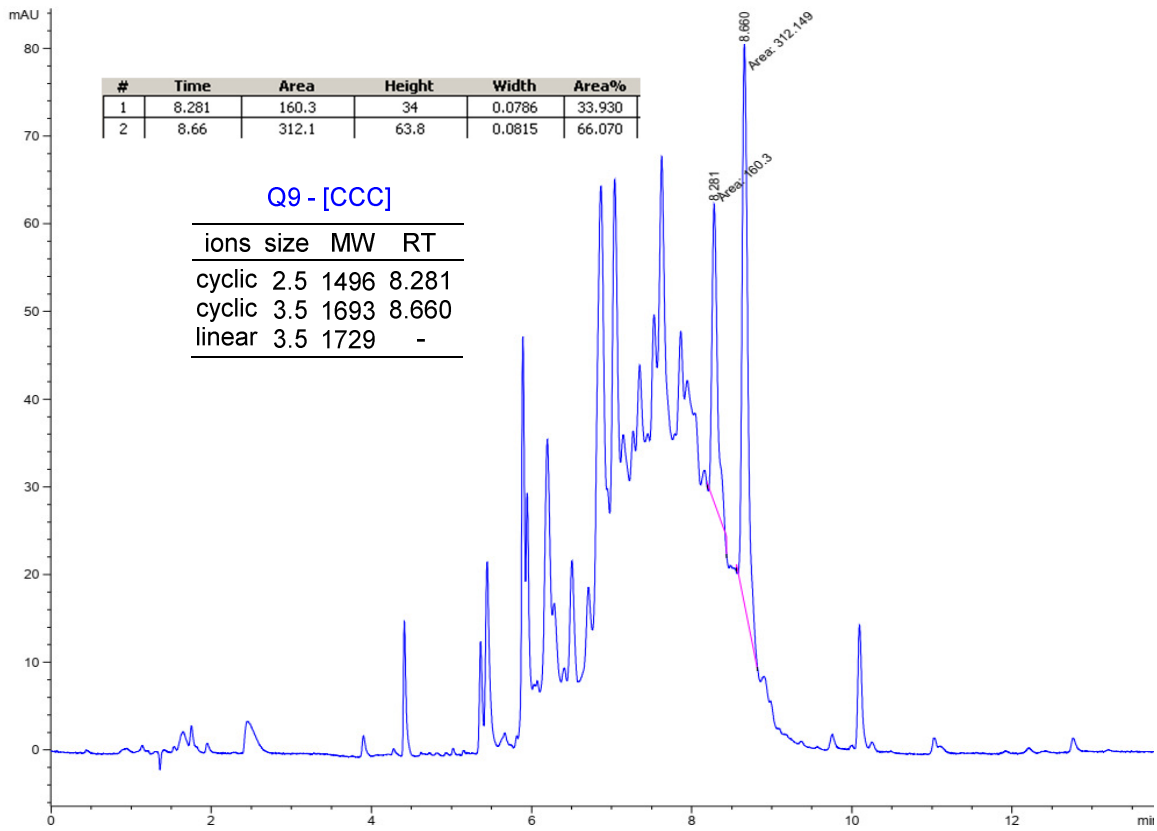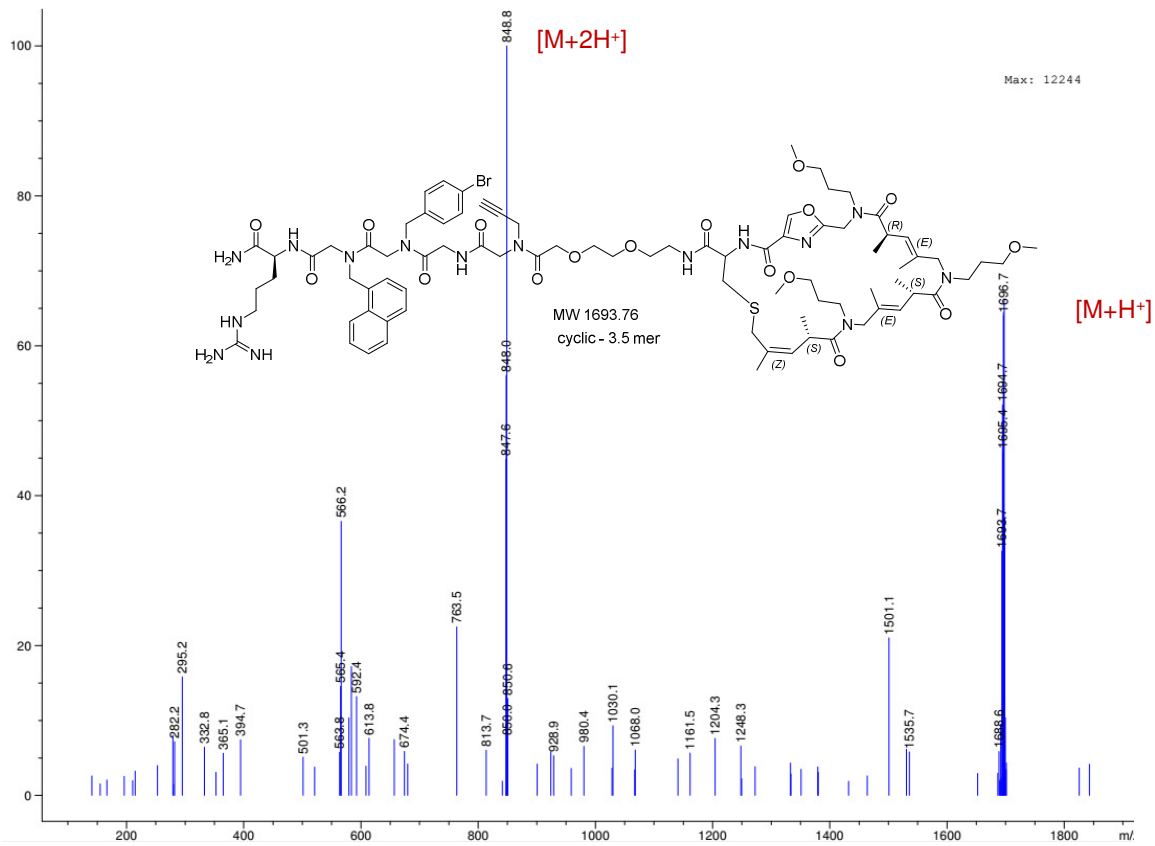

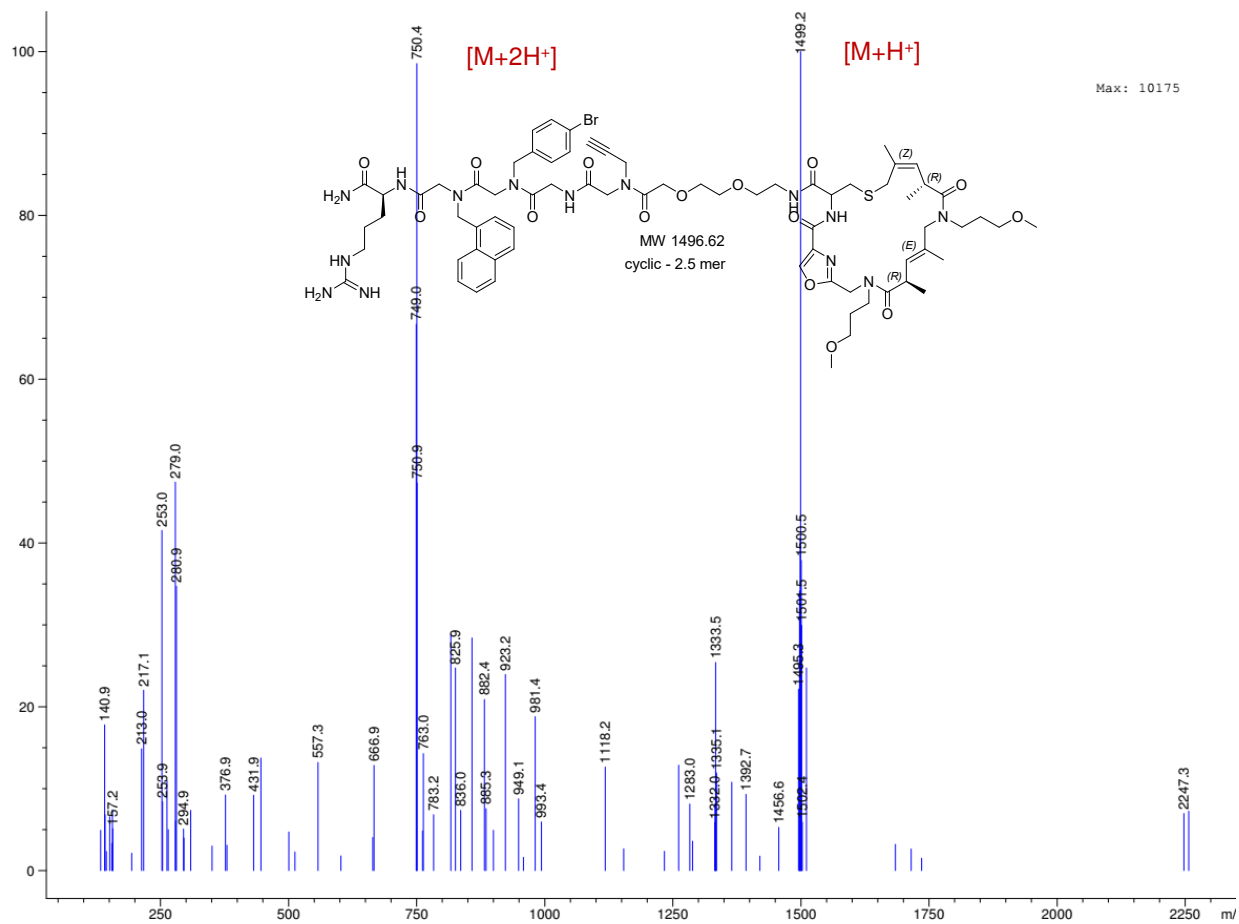

**Q10-[CDC]:** Incomplete cyclization was detected on 10um but was complete on 160um.

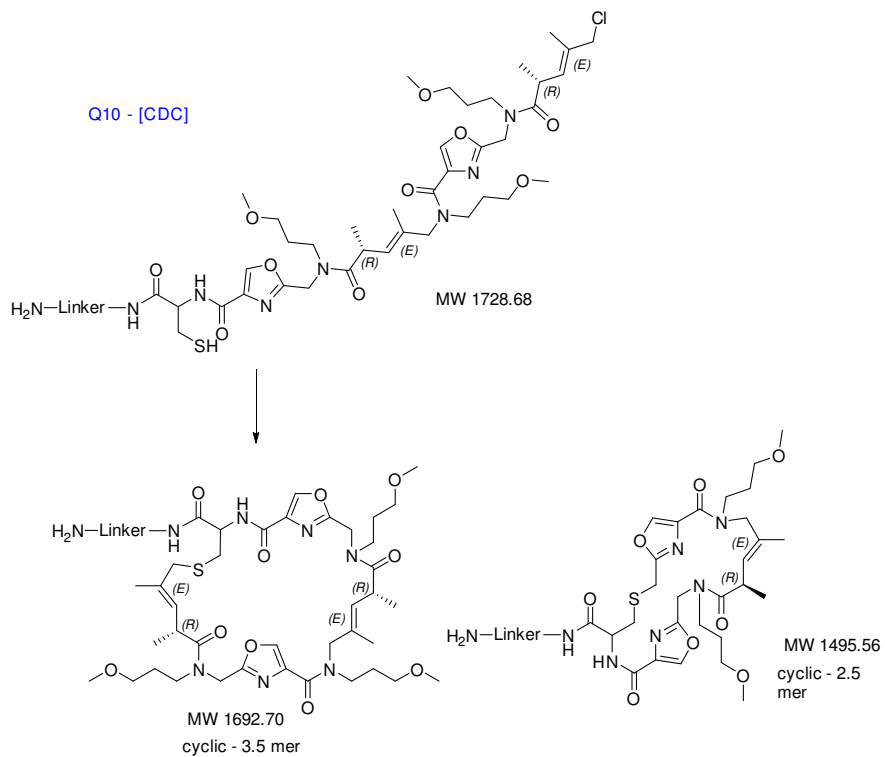

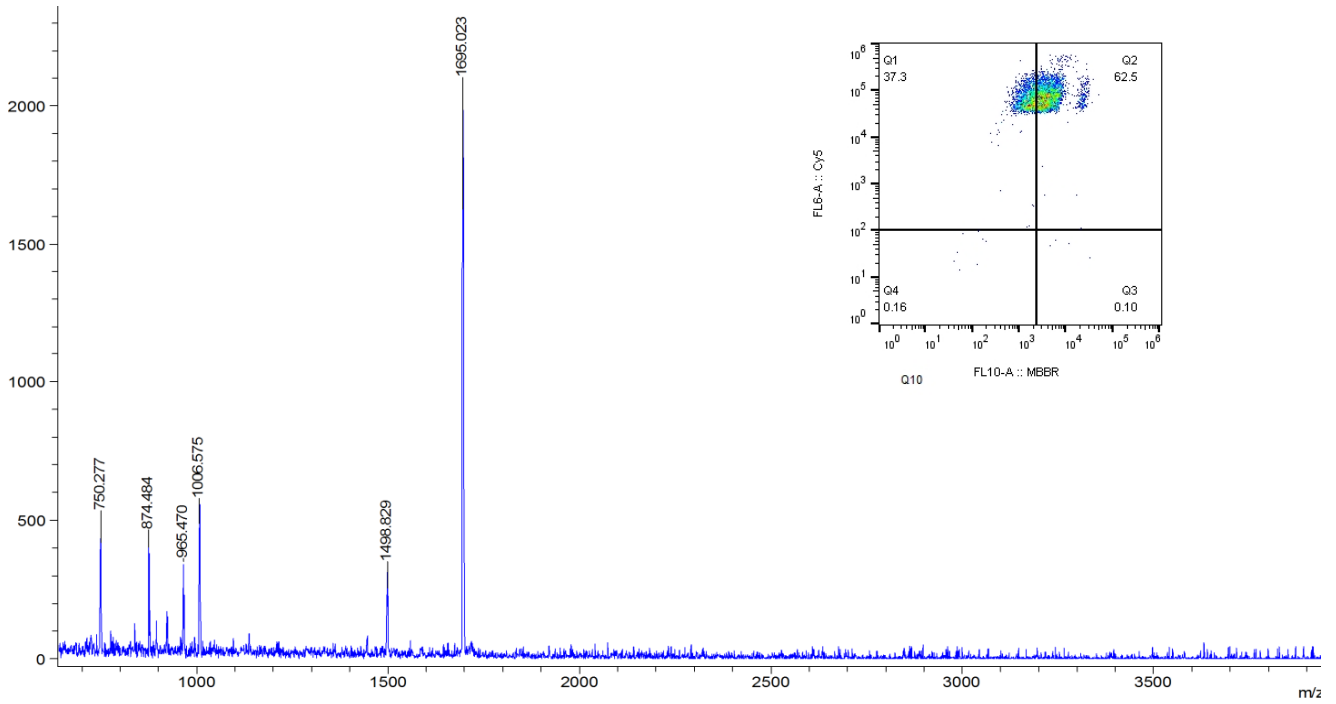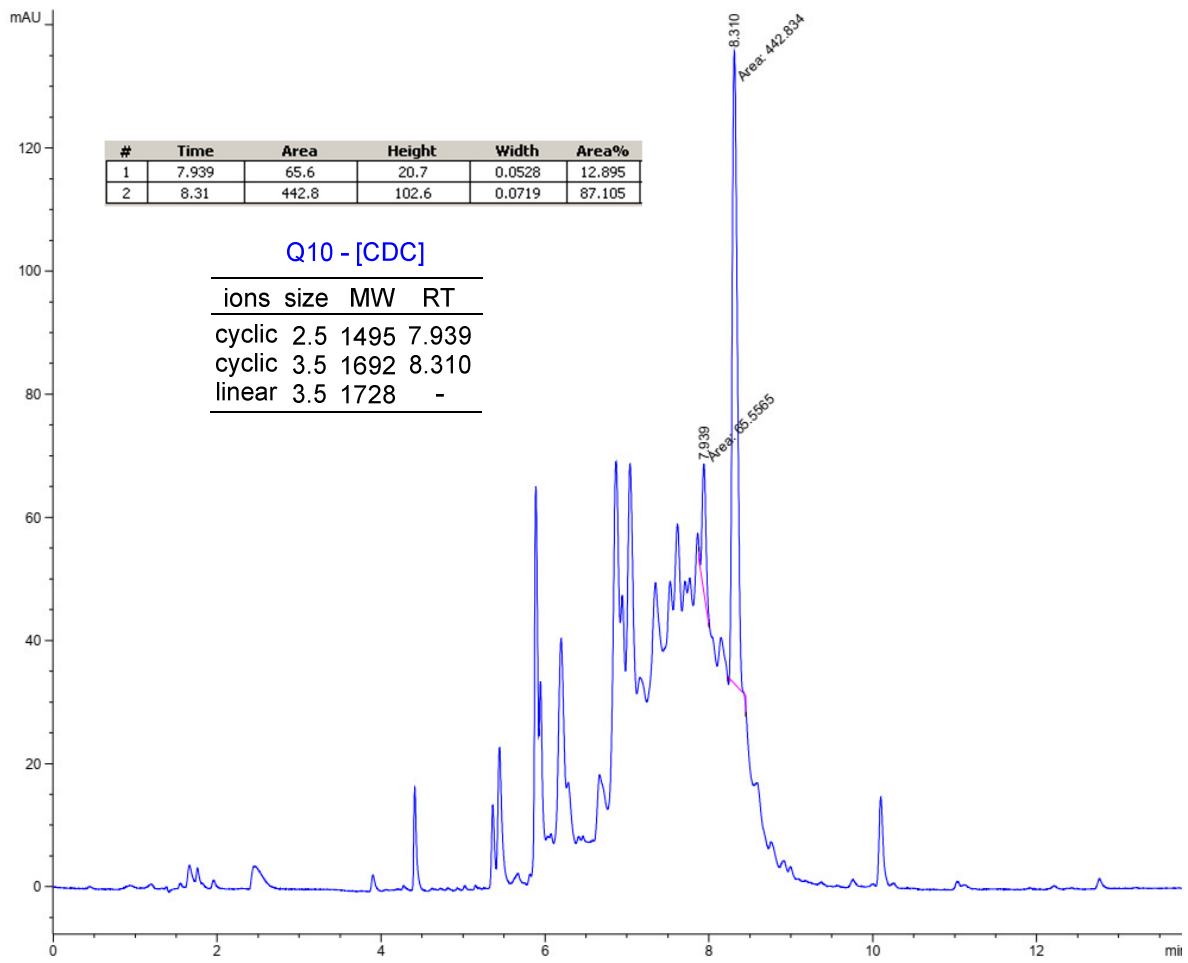

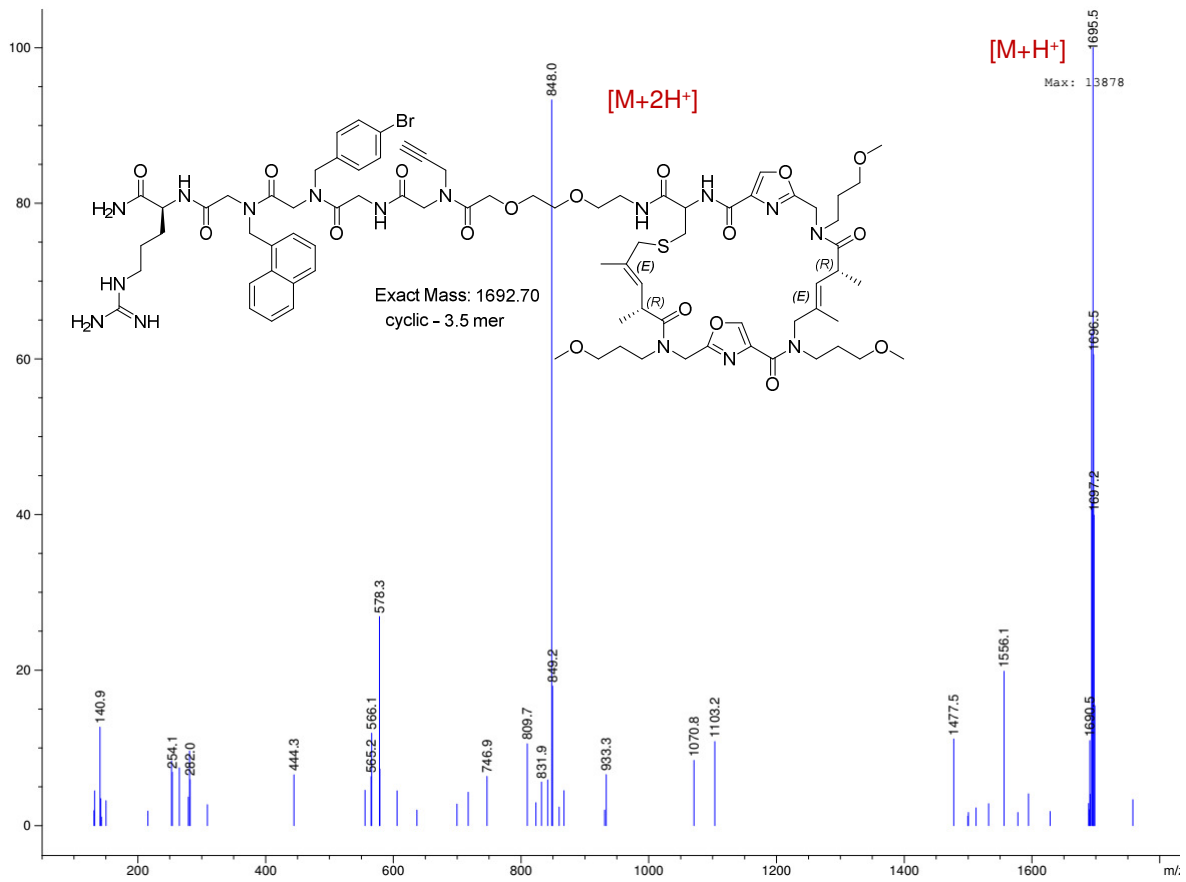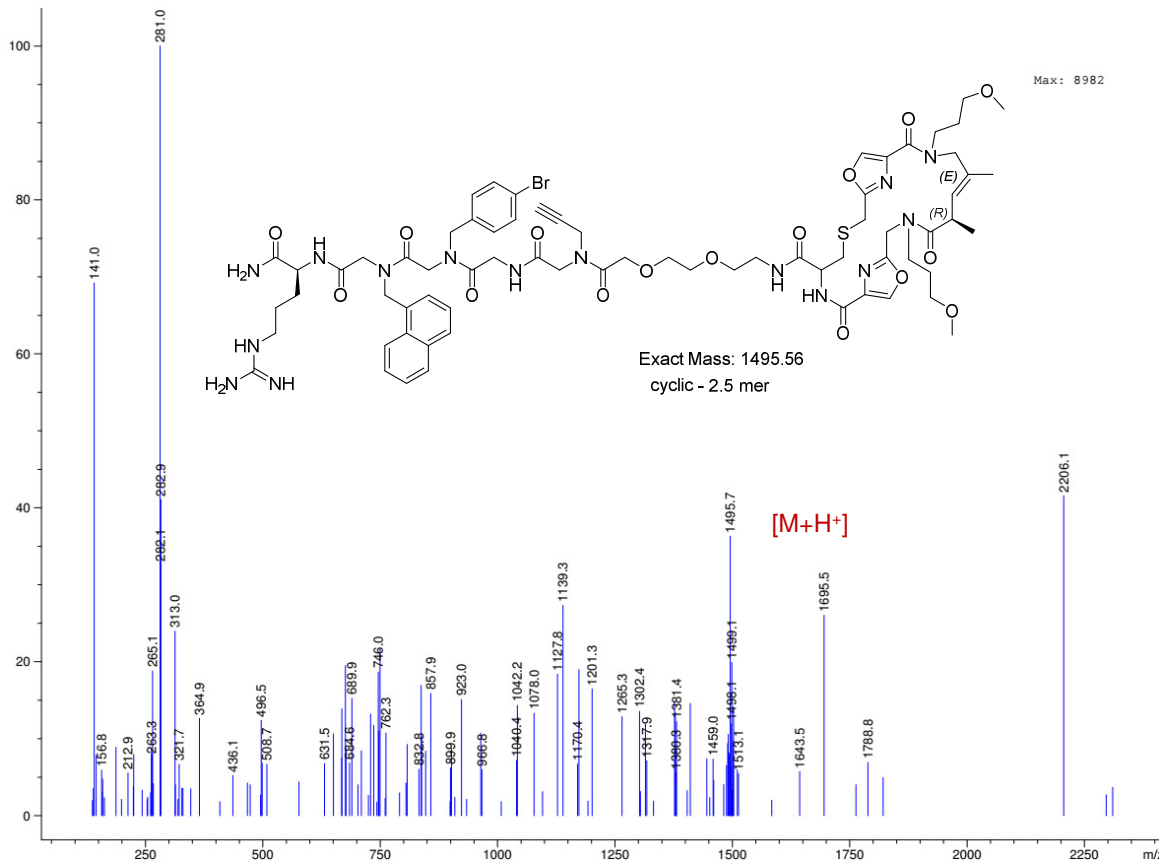

R1-[DAD]: Cyclization was complete on both 10um & 160um.

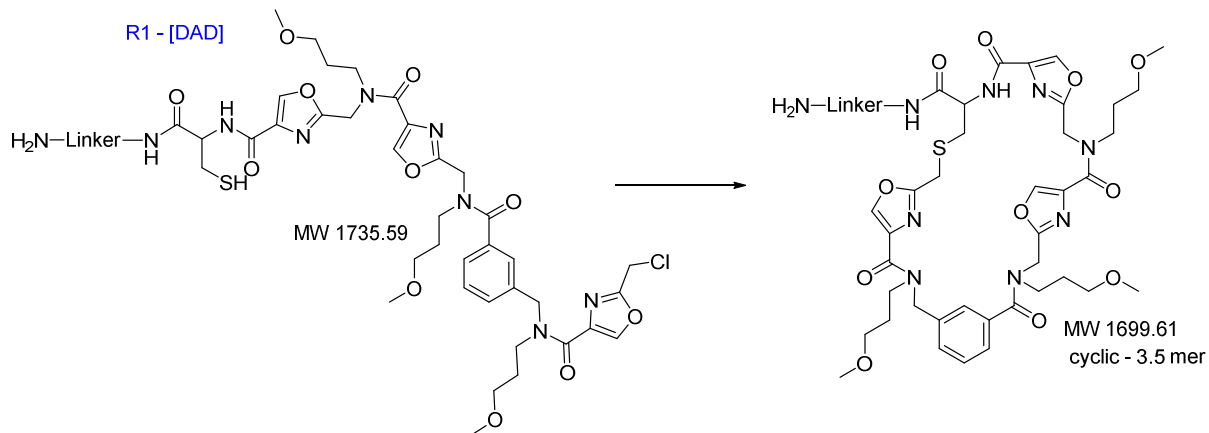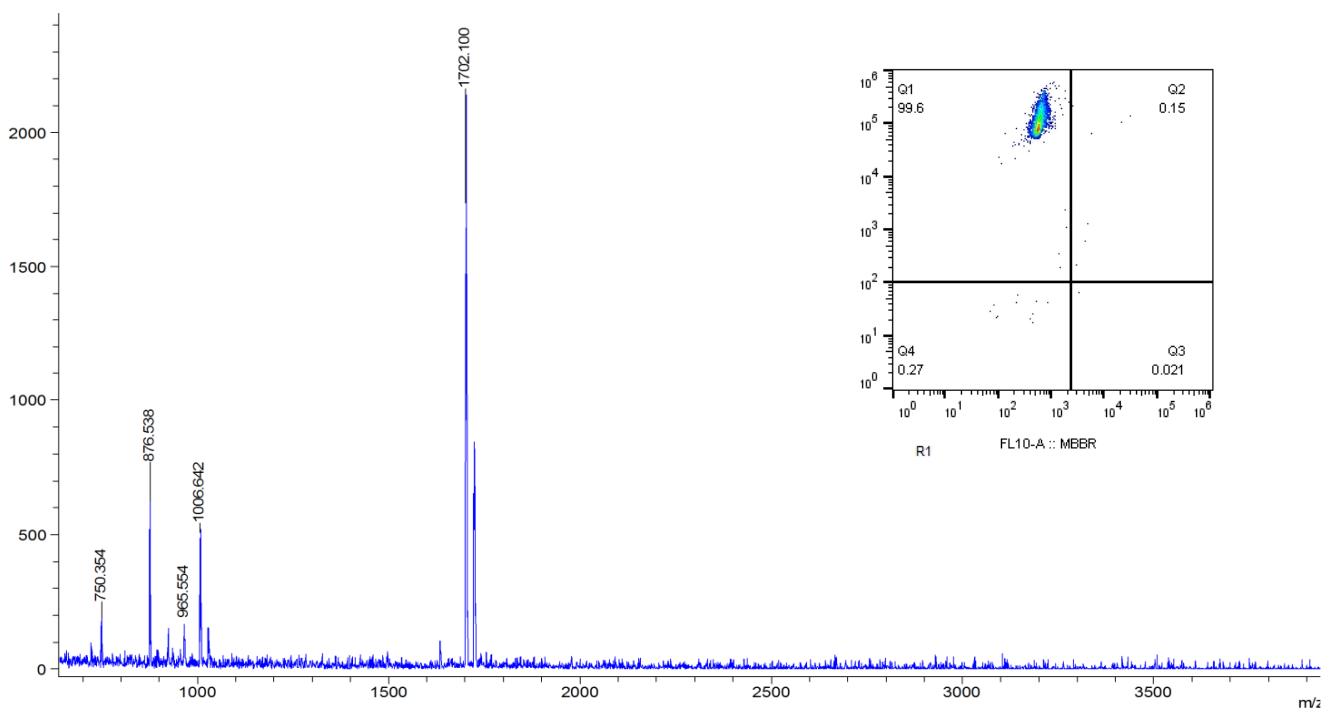



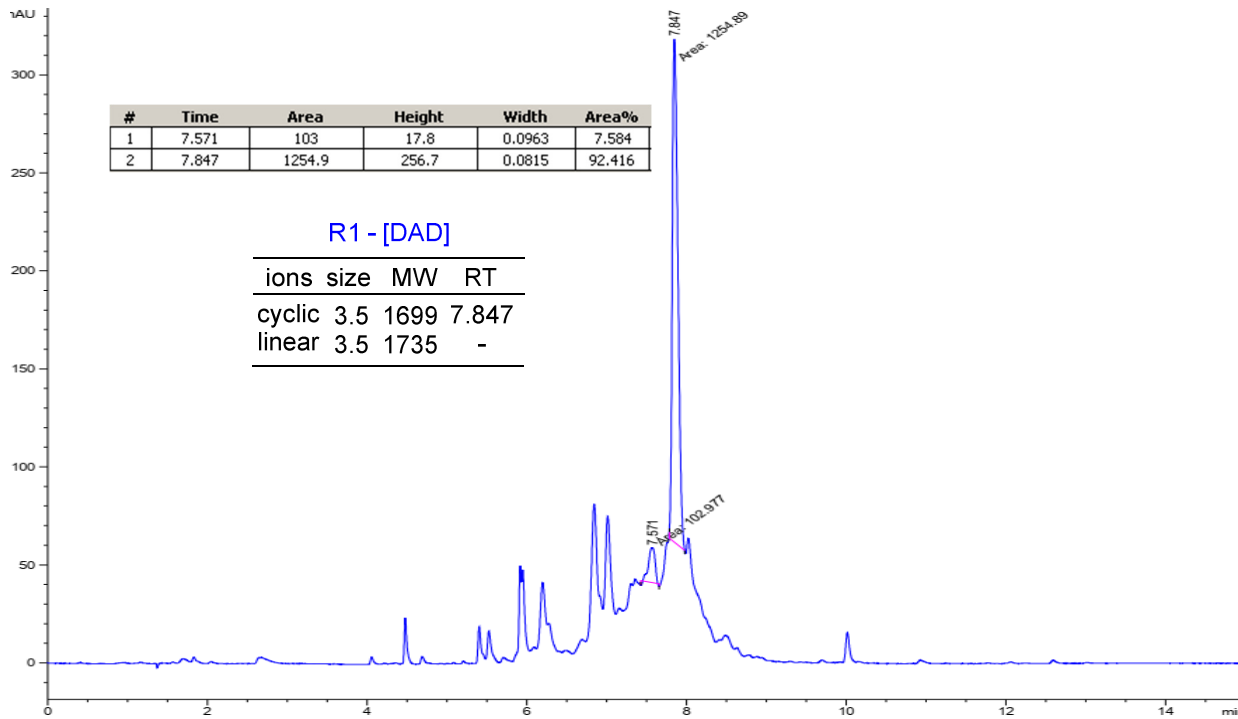

R1 - [DAD]

| ions   | size | MW   | RT    |
|--------|------|------|-------|
| cyclic | 3.5  | 1699 | 7.847 |
| linear | 3.5  | 1735 | -     |

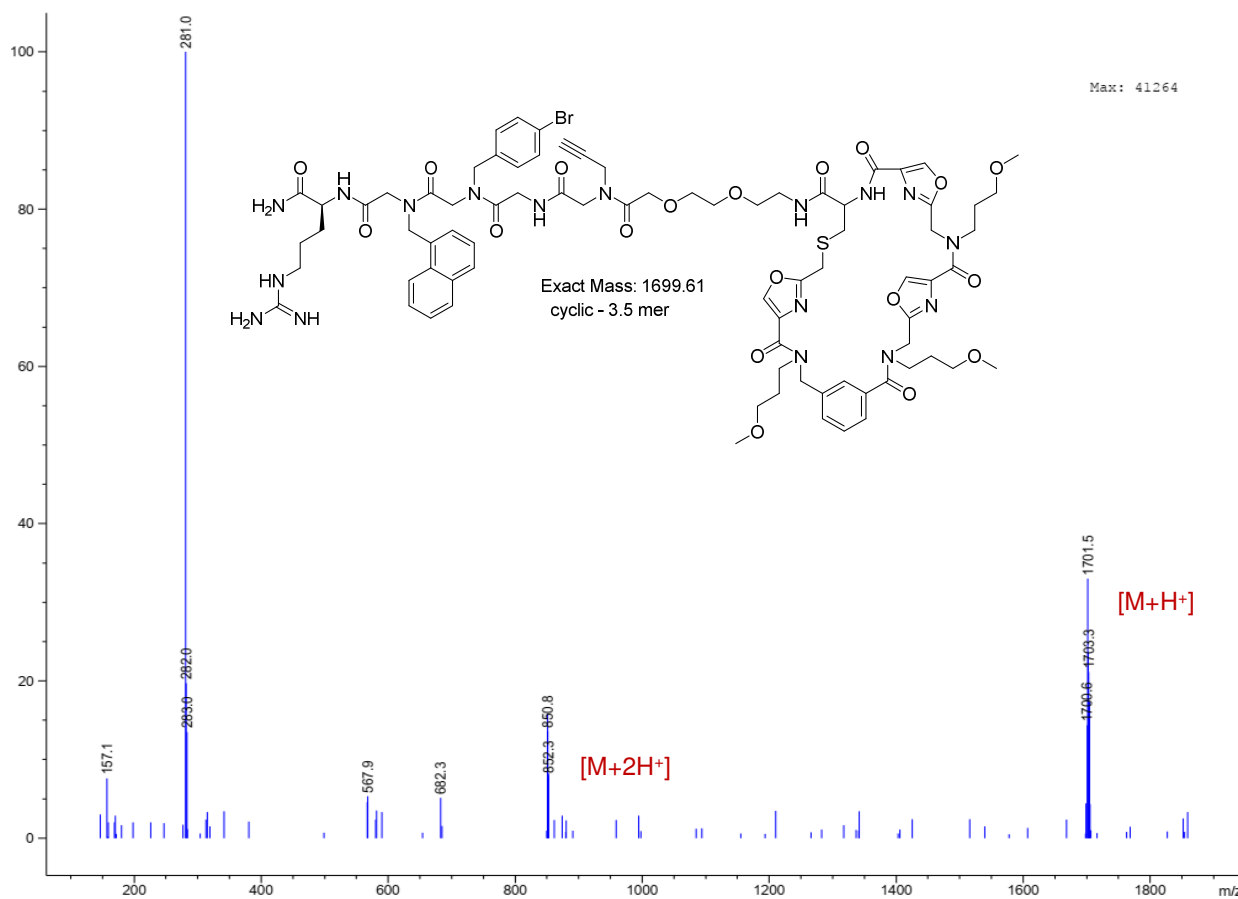



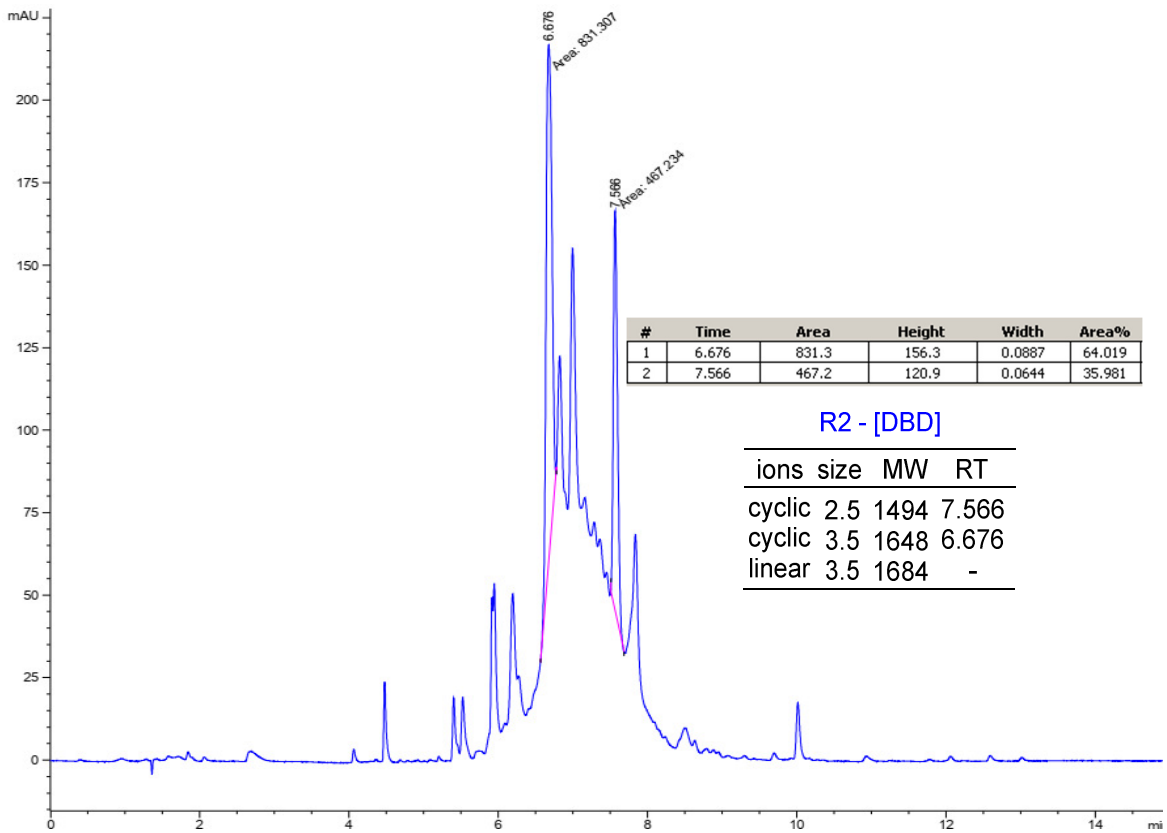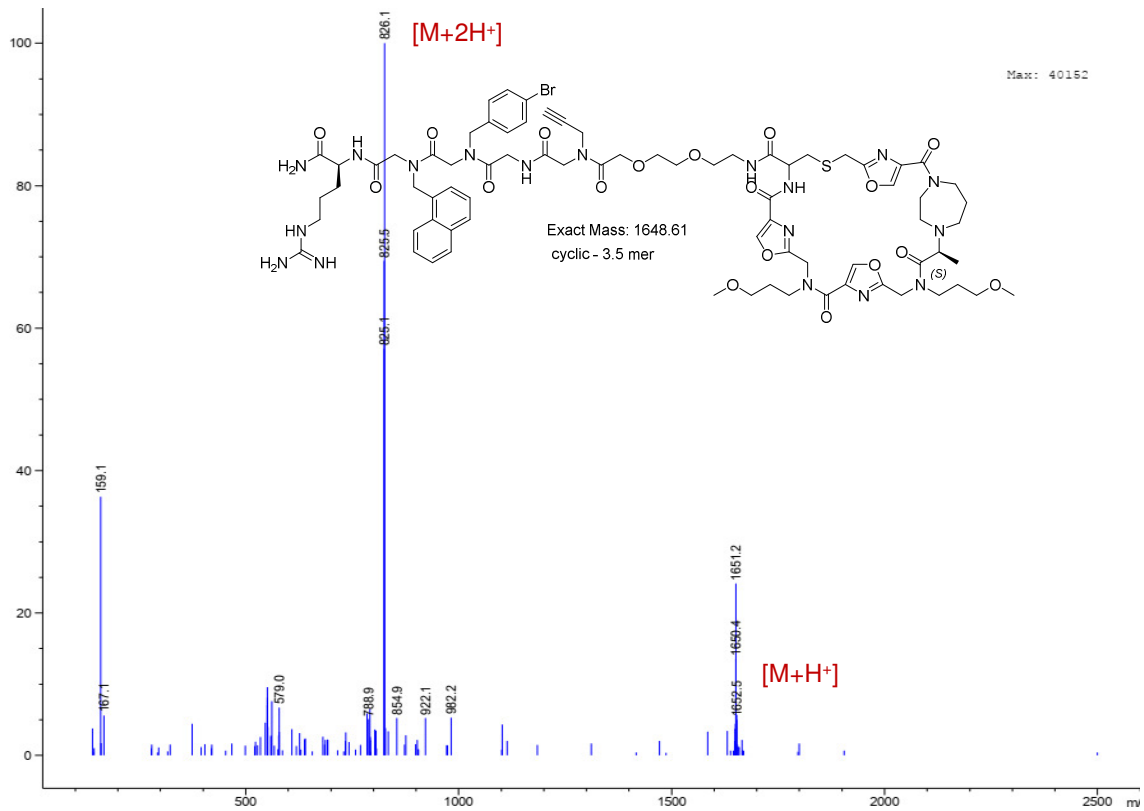

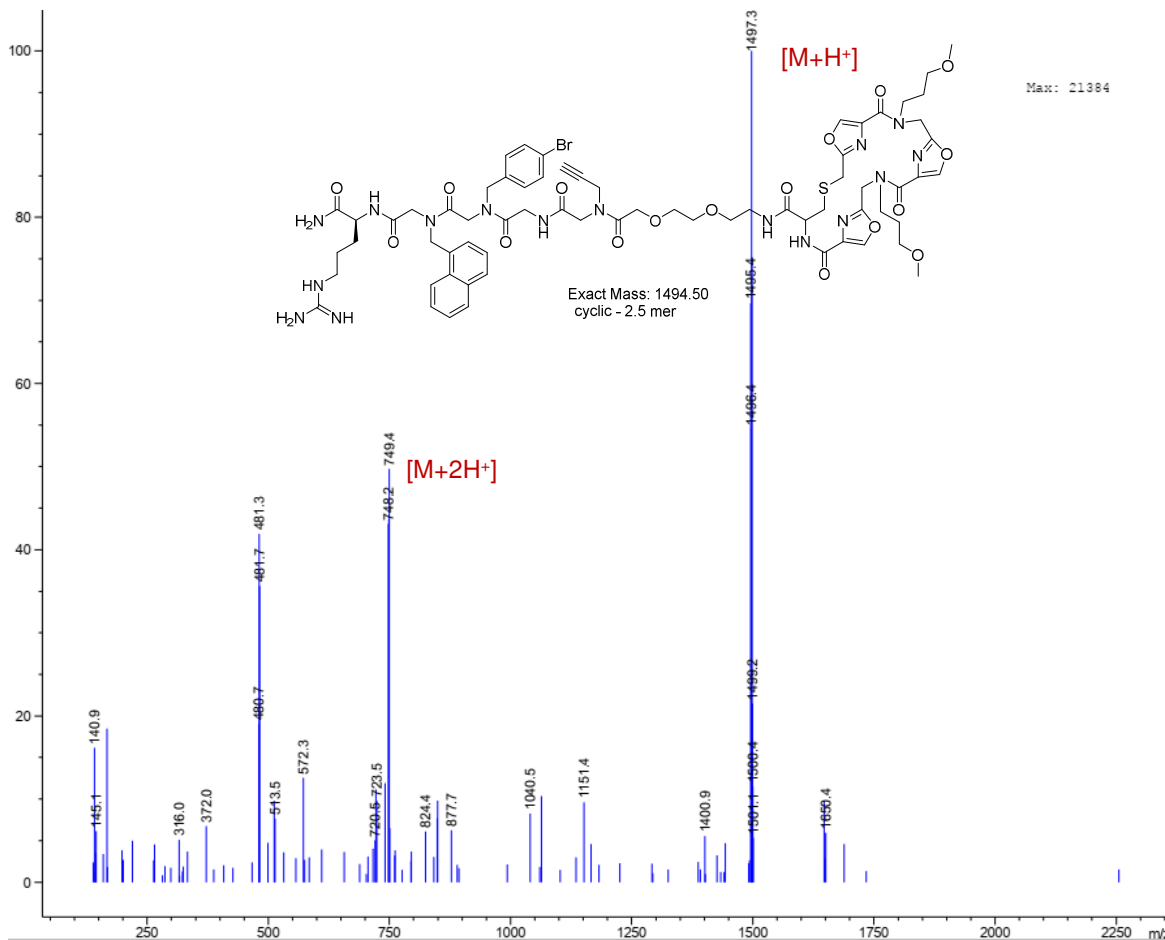

**R3-[DCD]:** Cyclization was complete on both 10um & 160um.

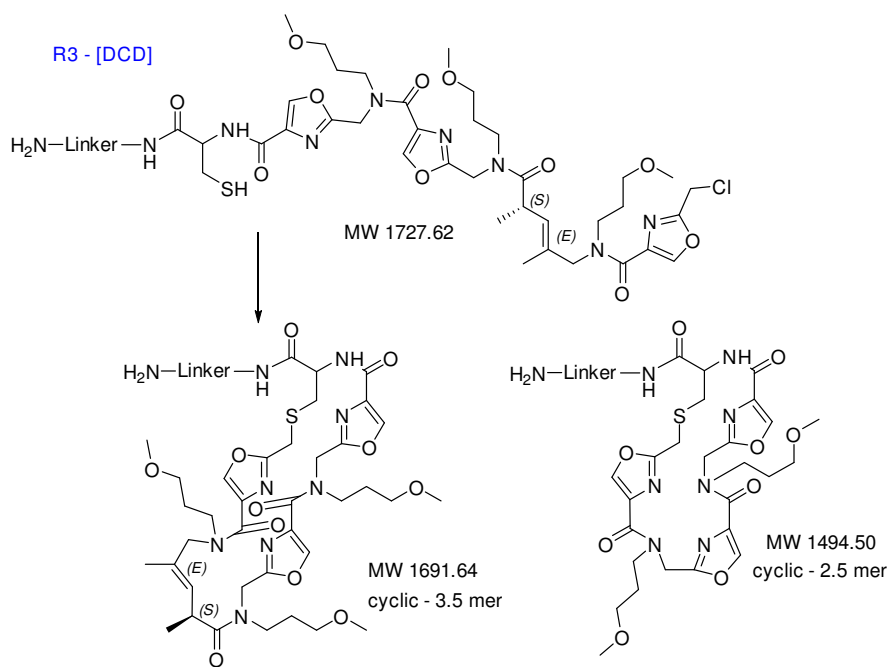

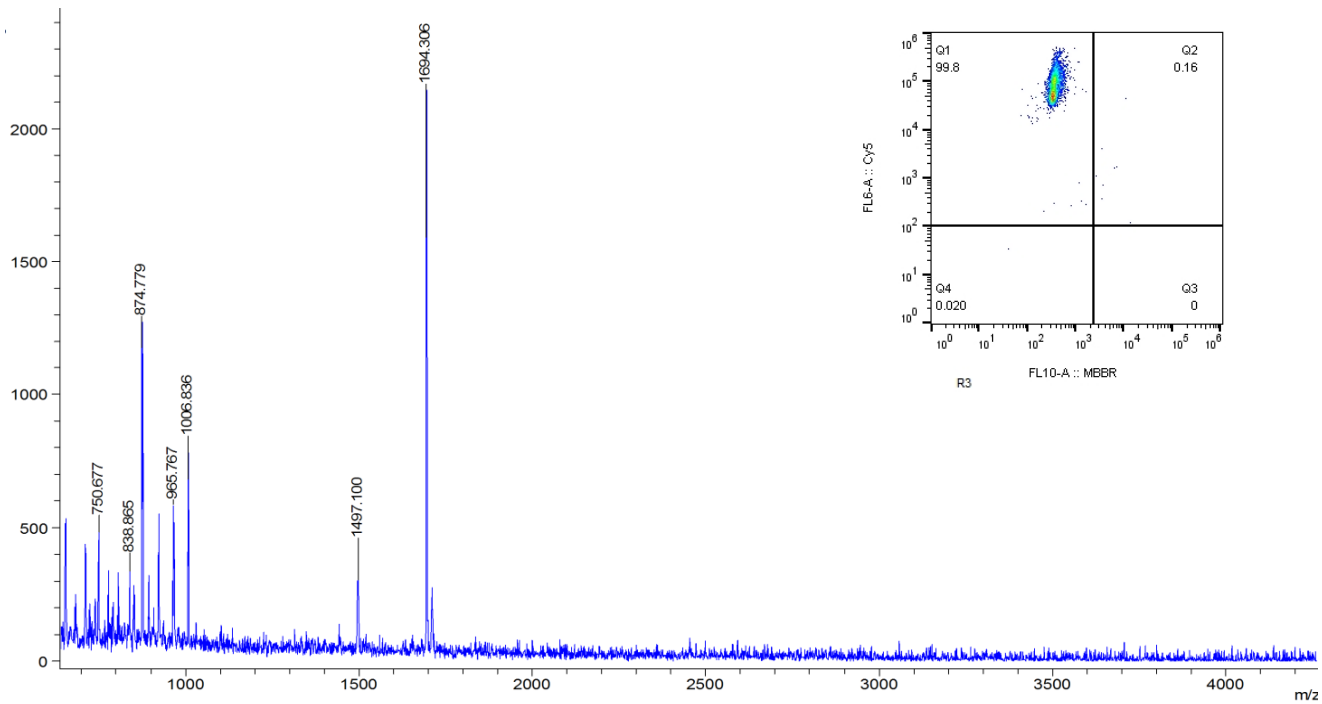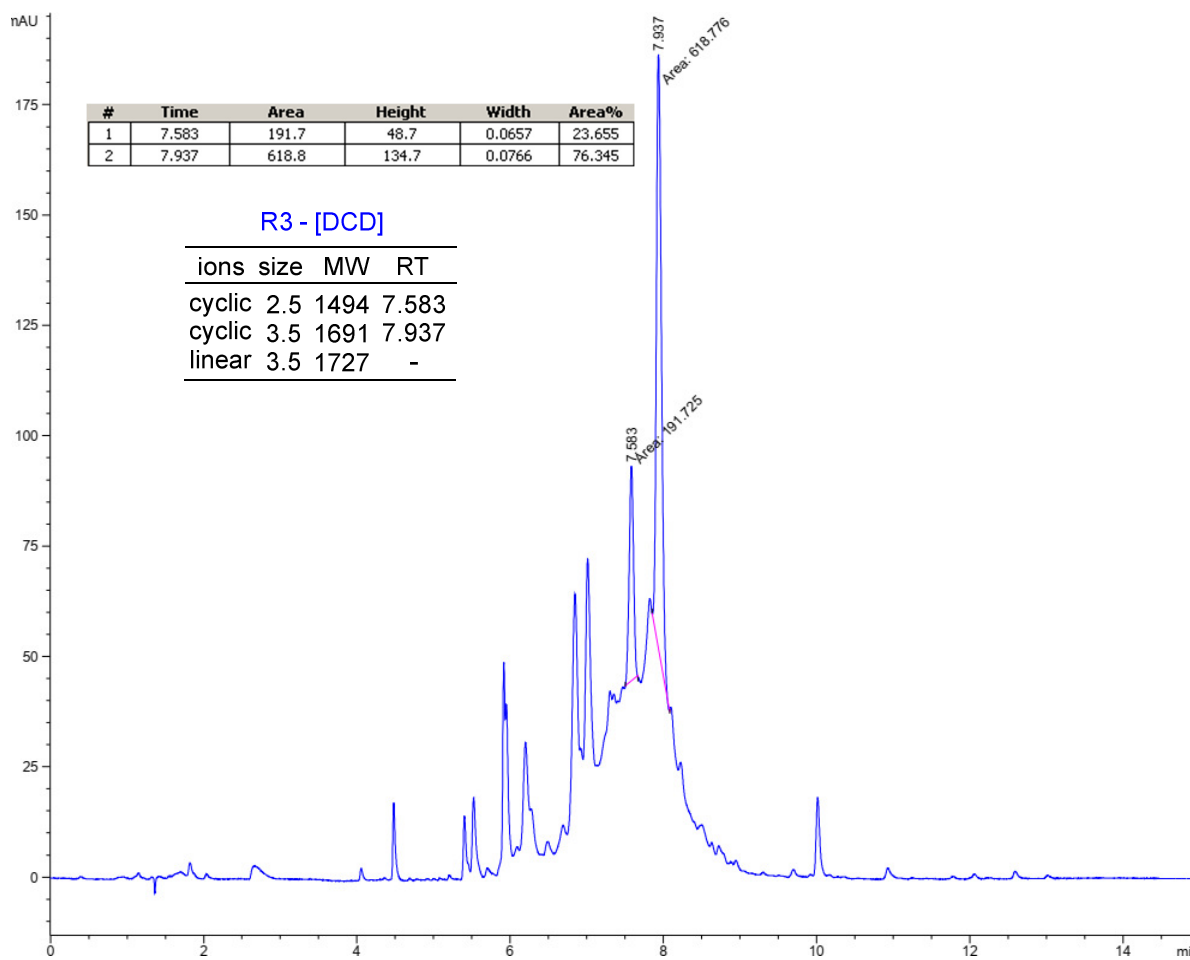

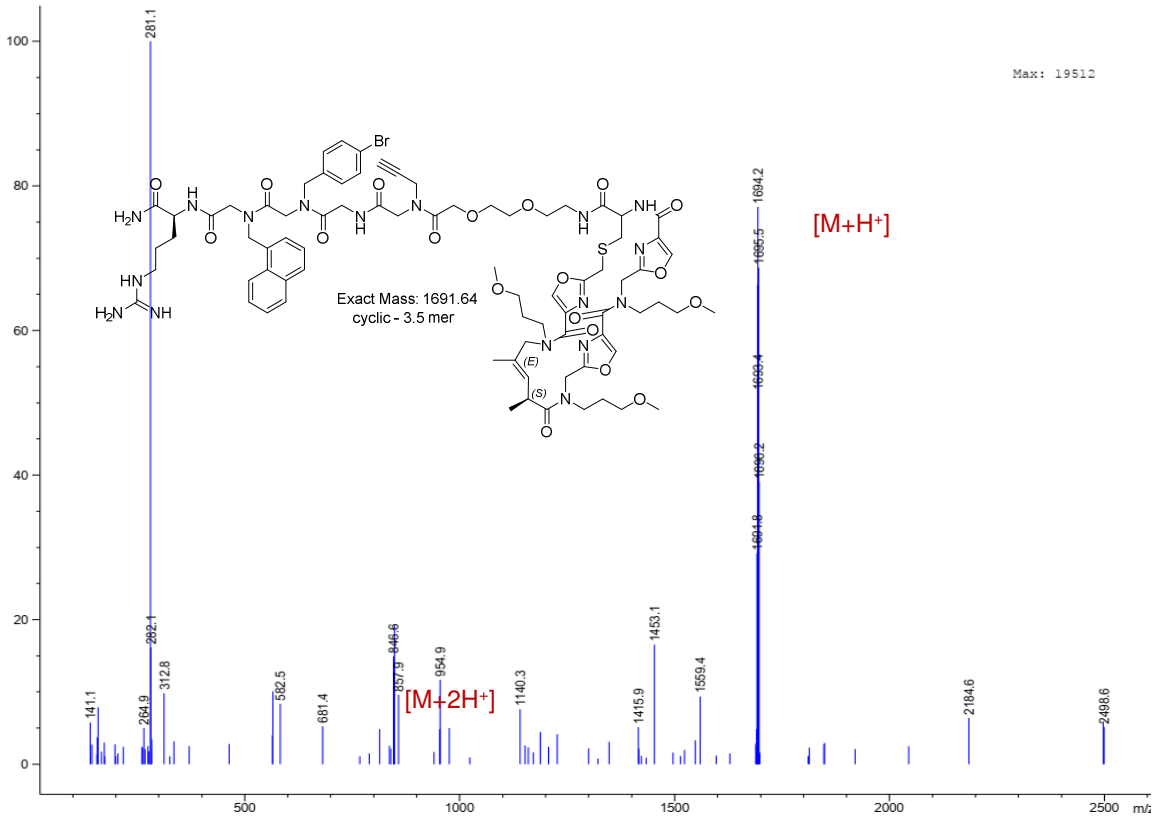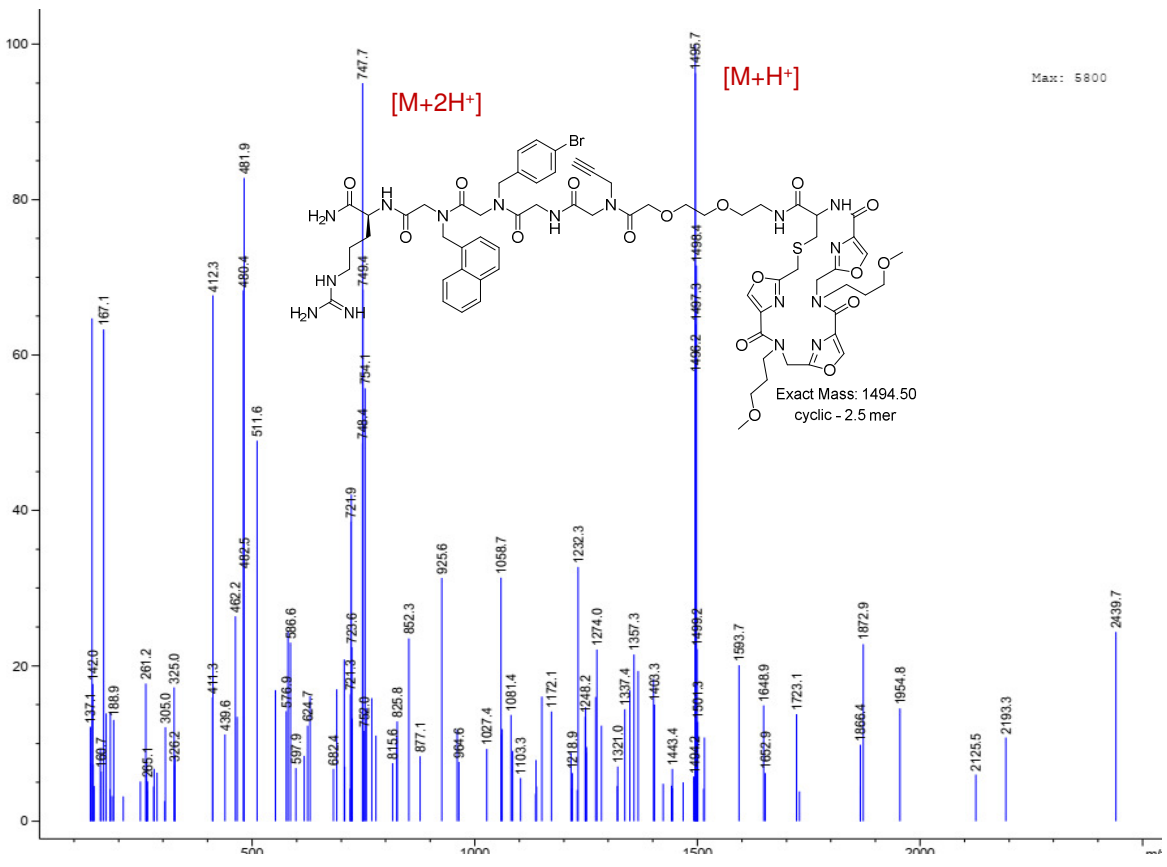

**R4-[DDD]:** Cyclization was complete on both 10um & 160um.

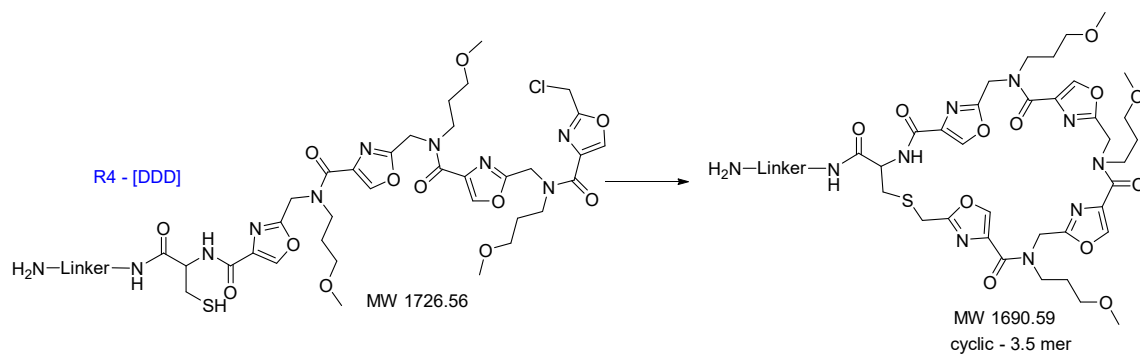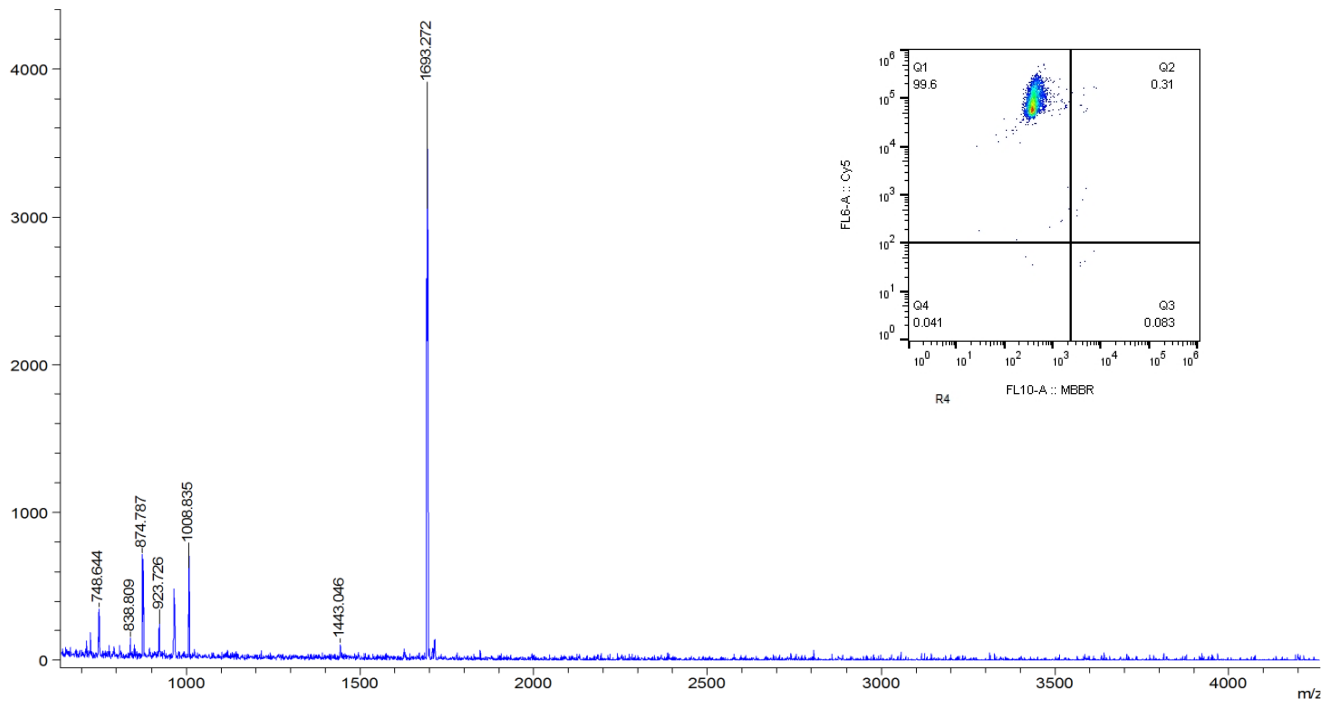

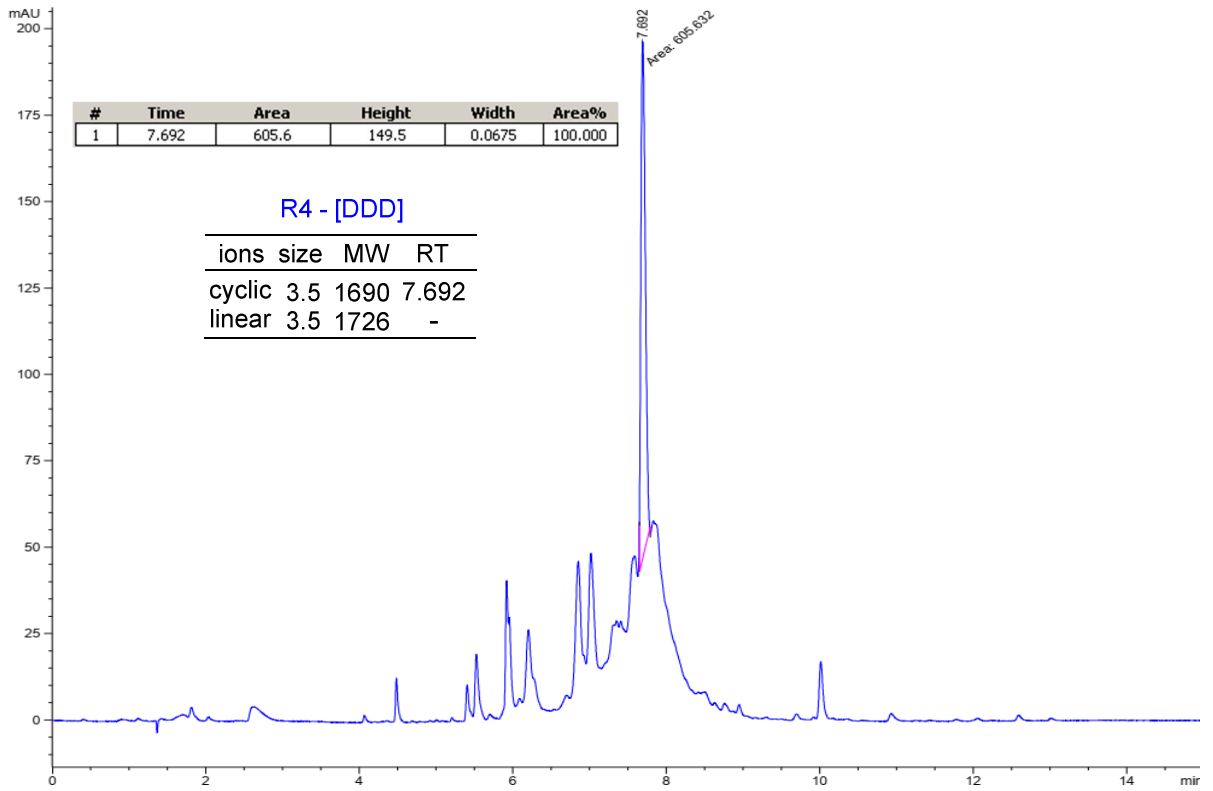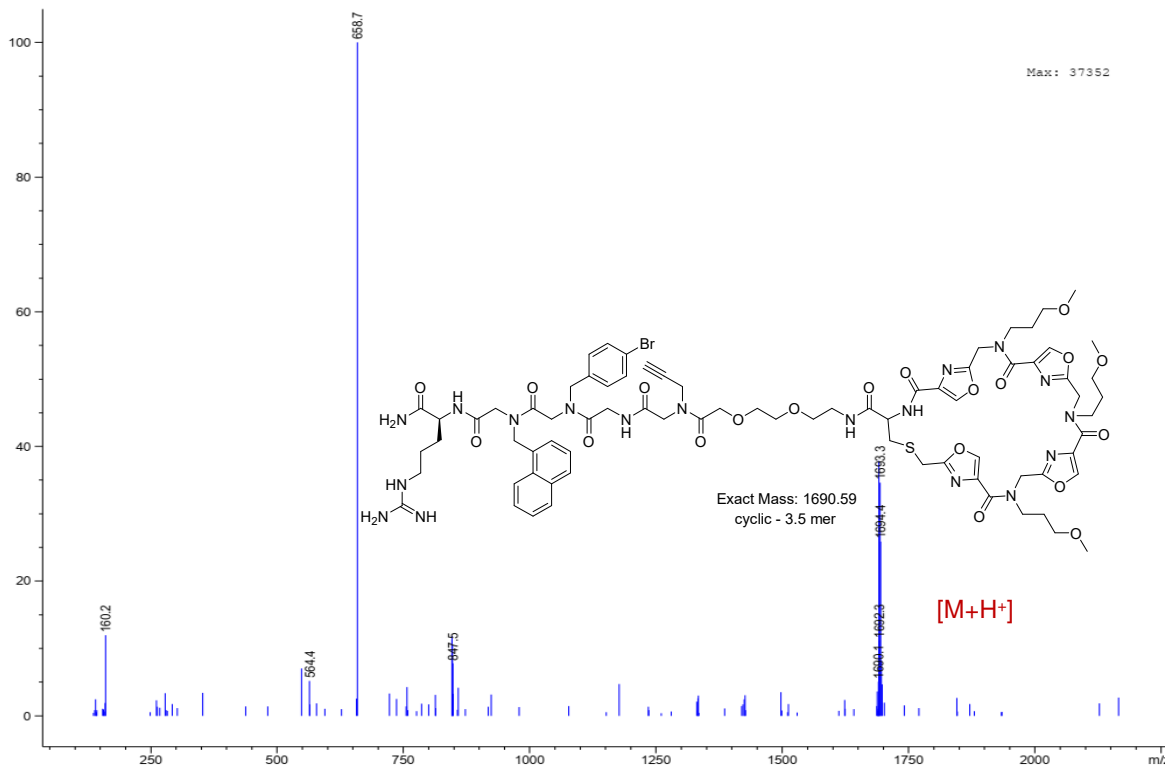



**R7-[DAC]:** Cyclization was complete on both 10um & 160um.

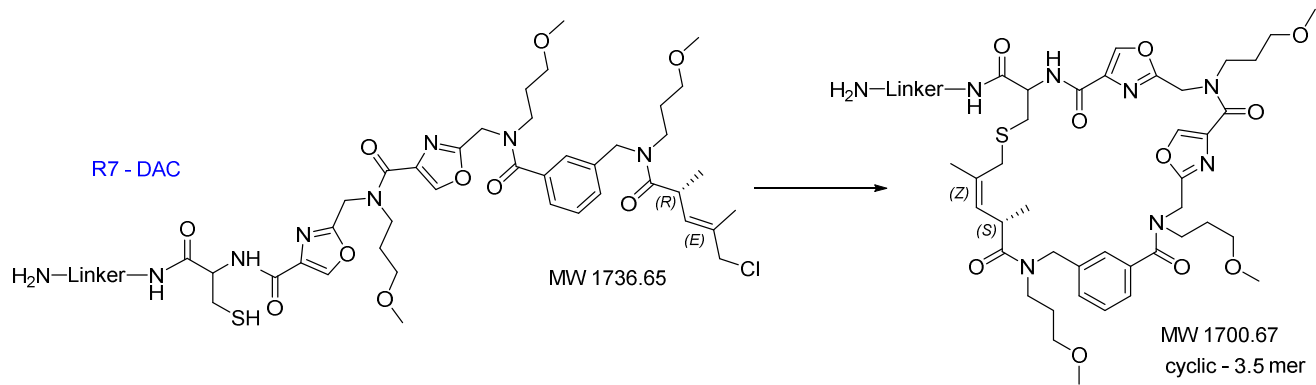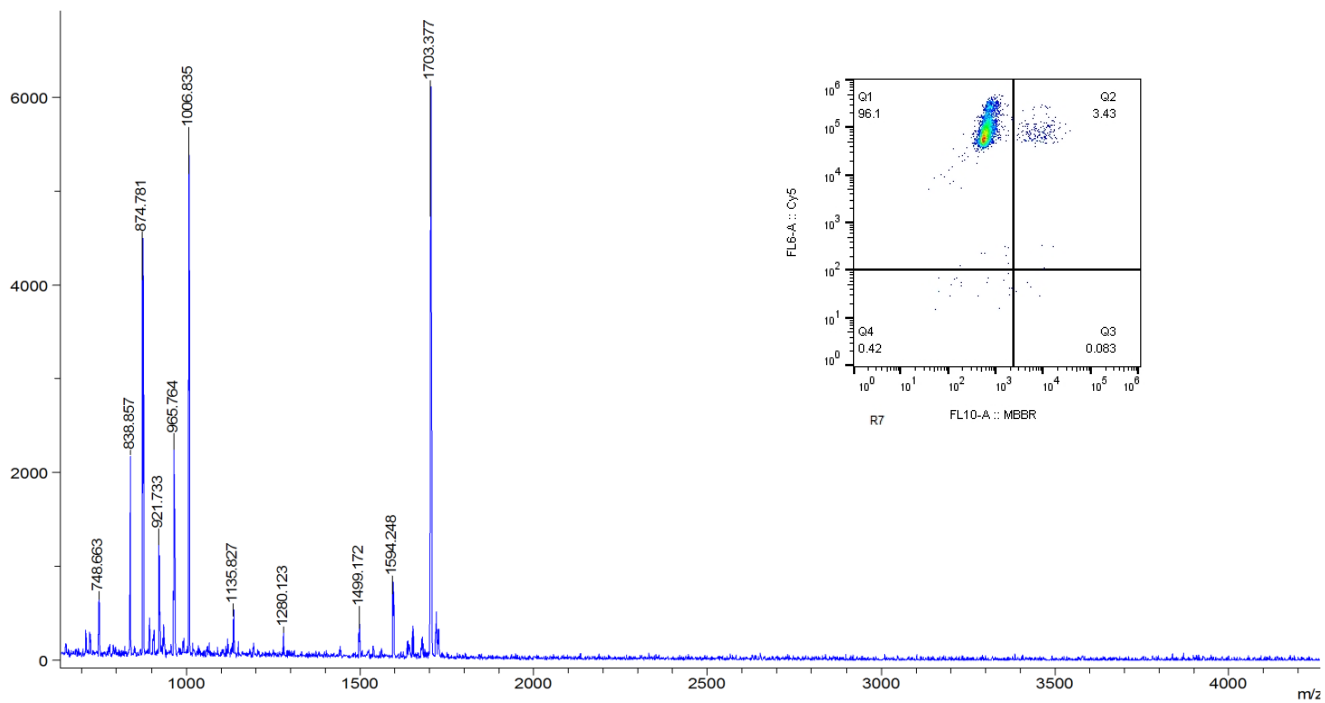

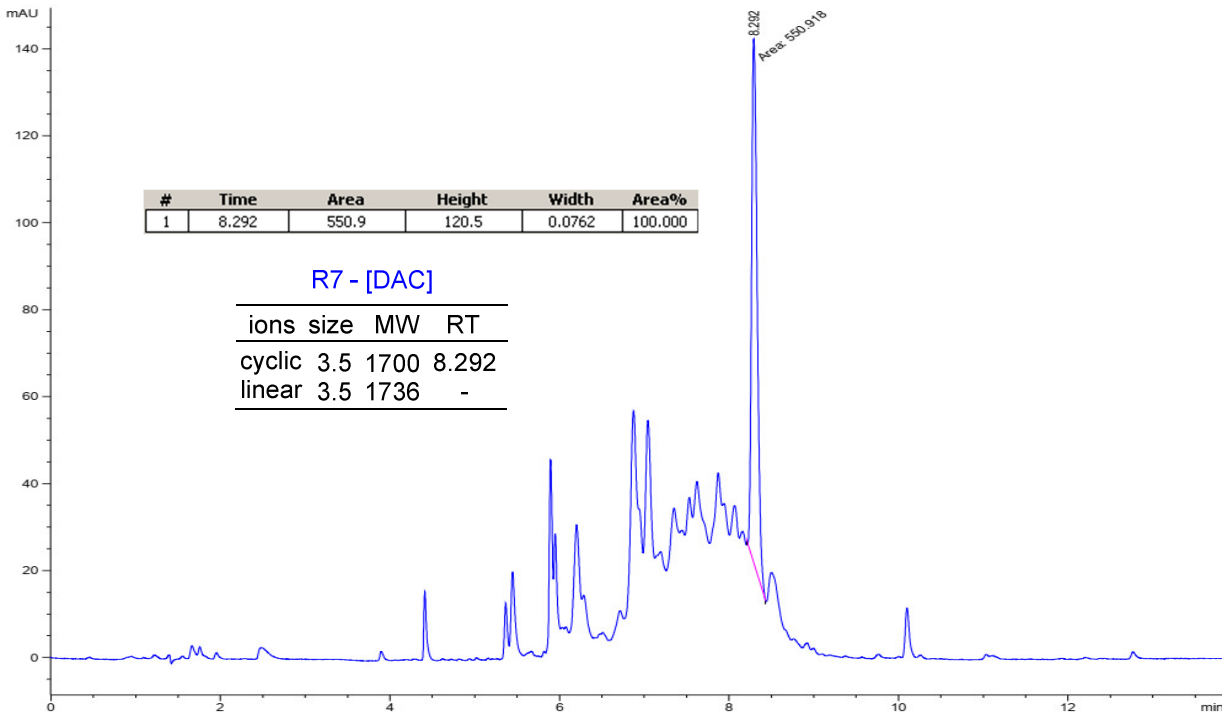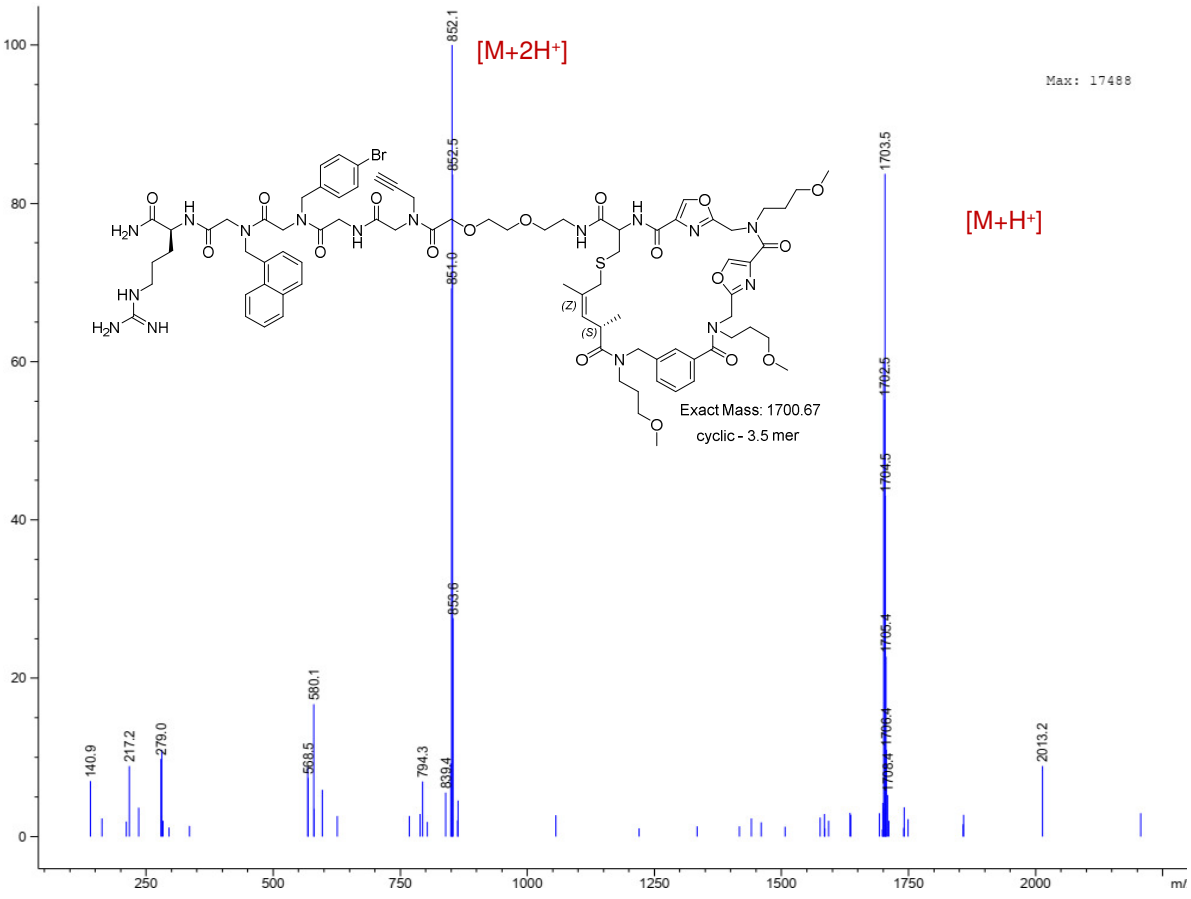

**R8-[DBC]:** Cyclization was complete on both 10um & 160um.

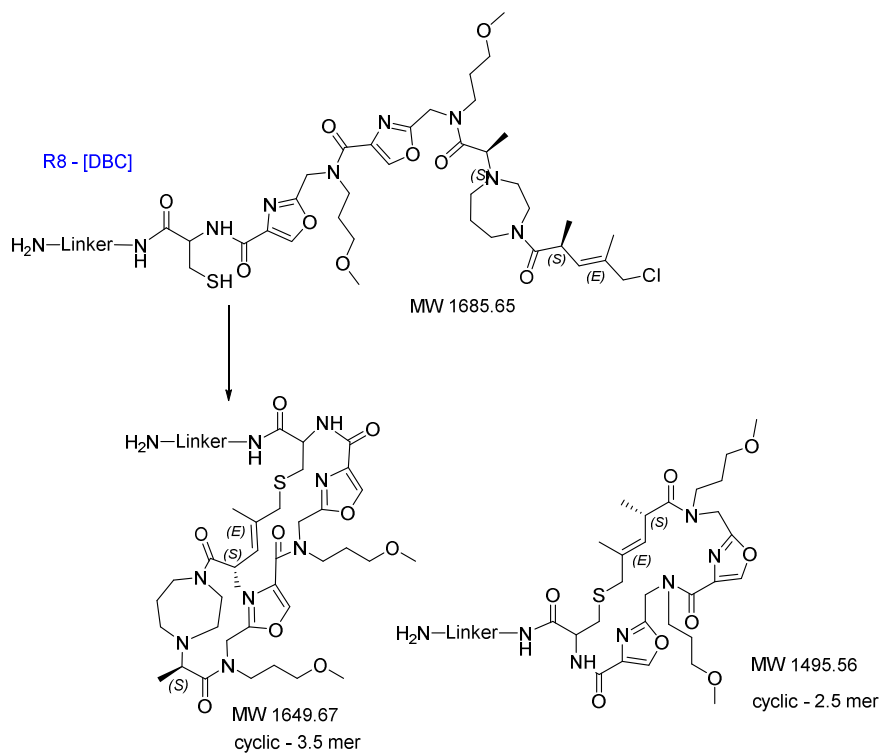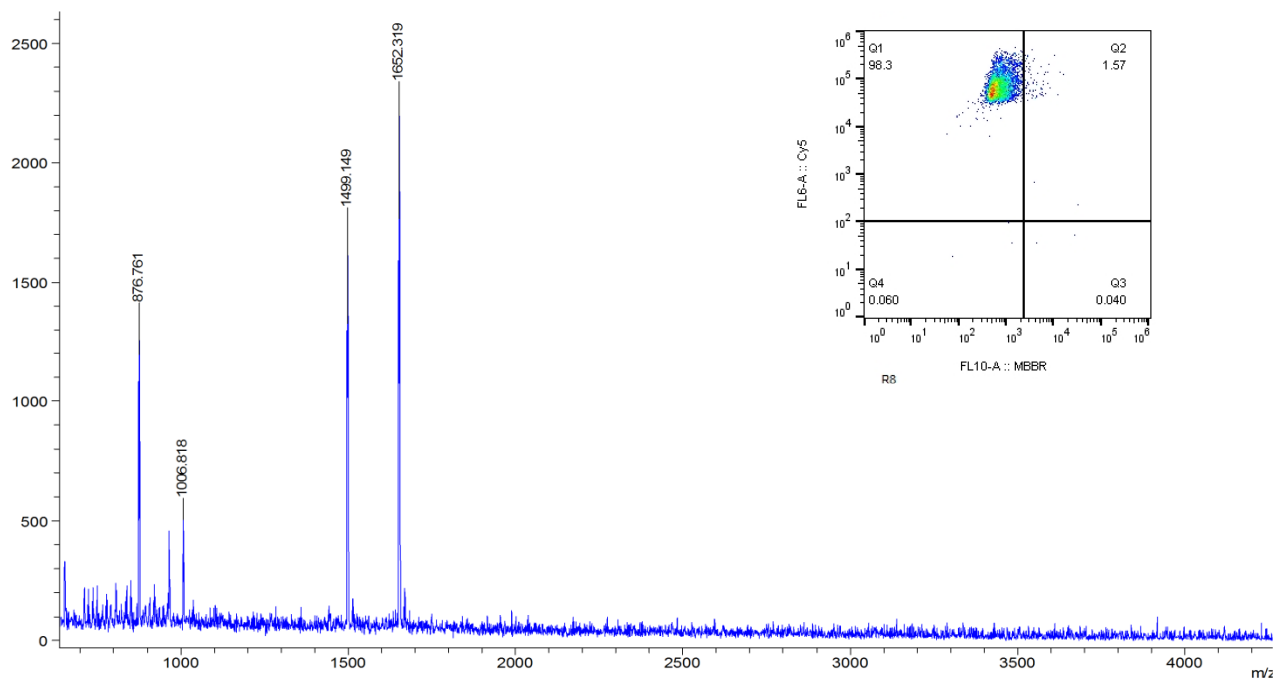

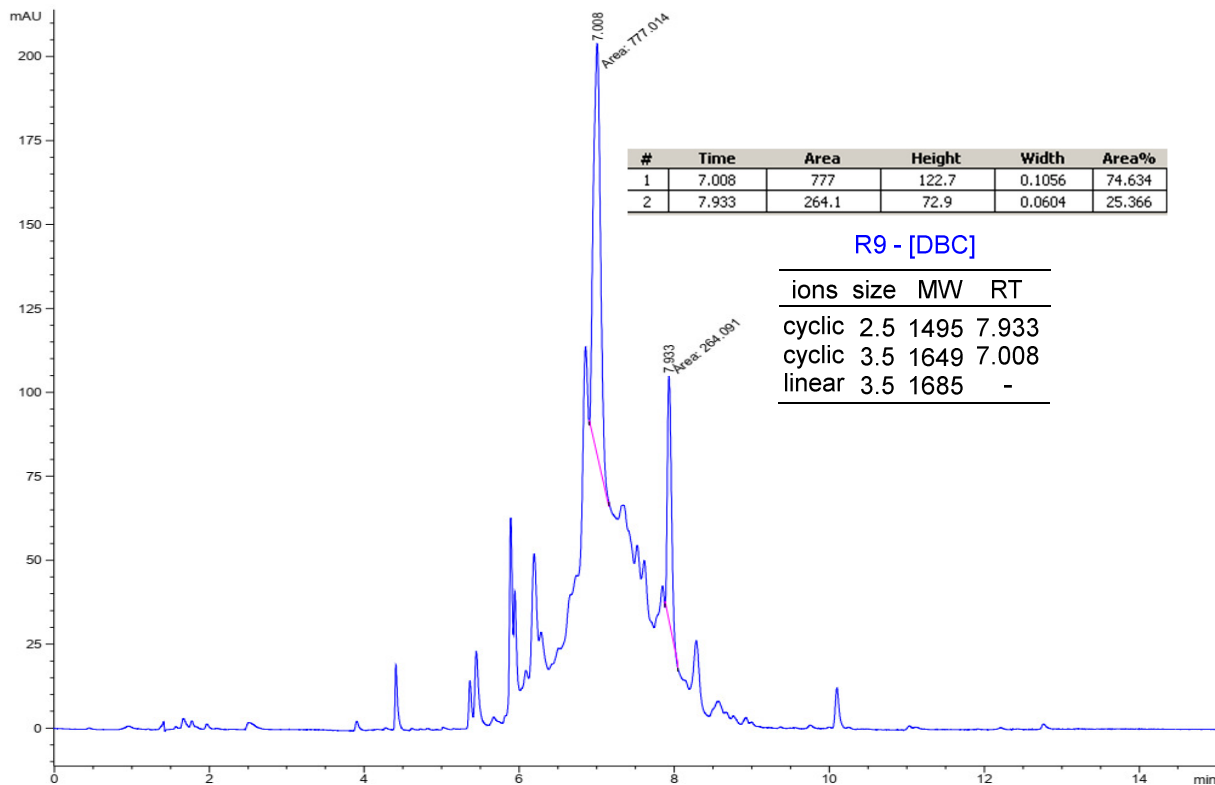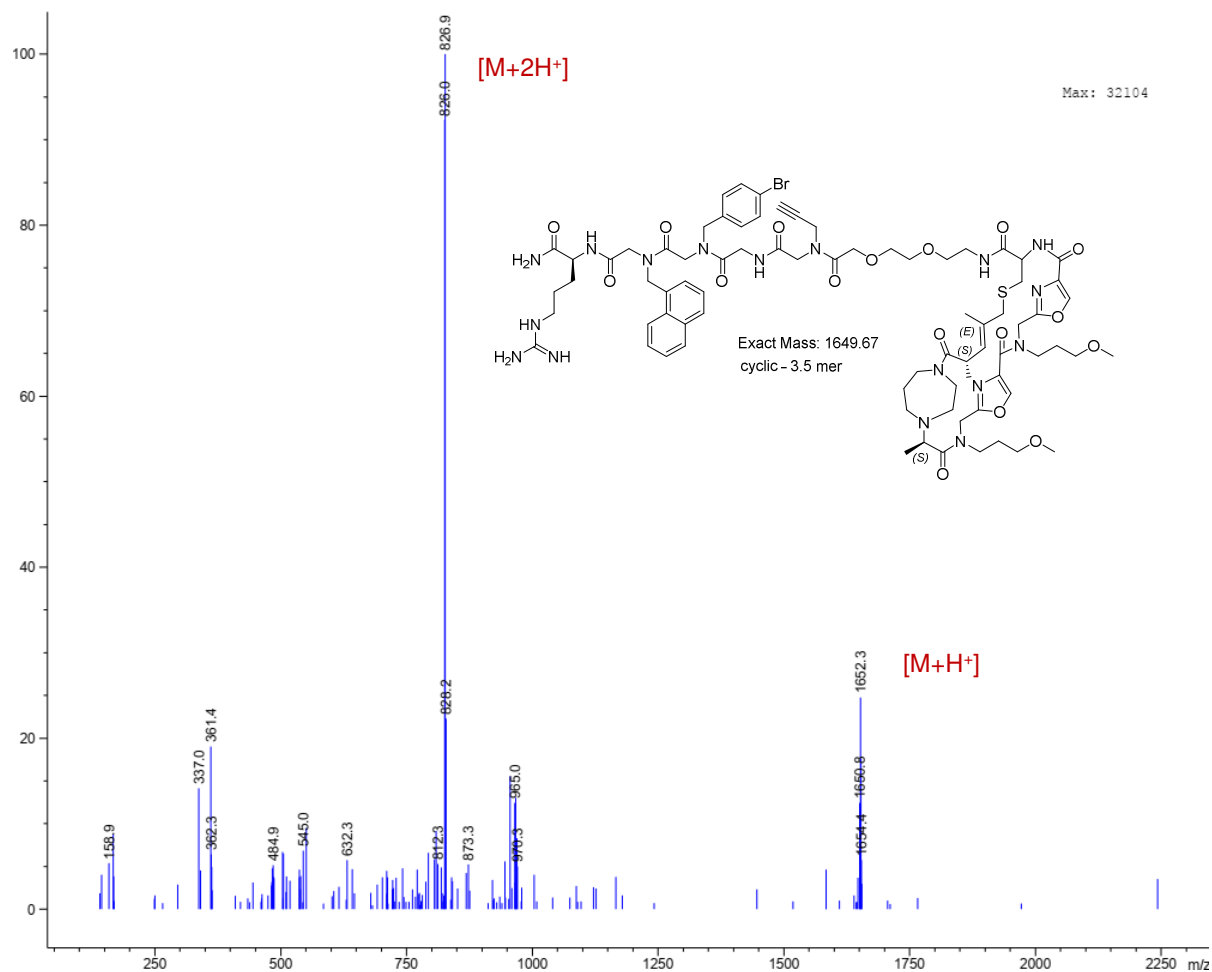

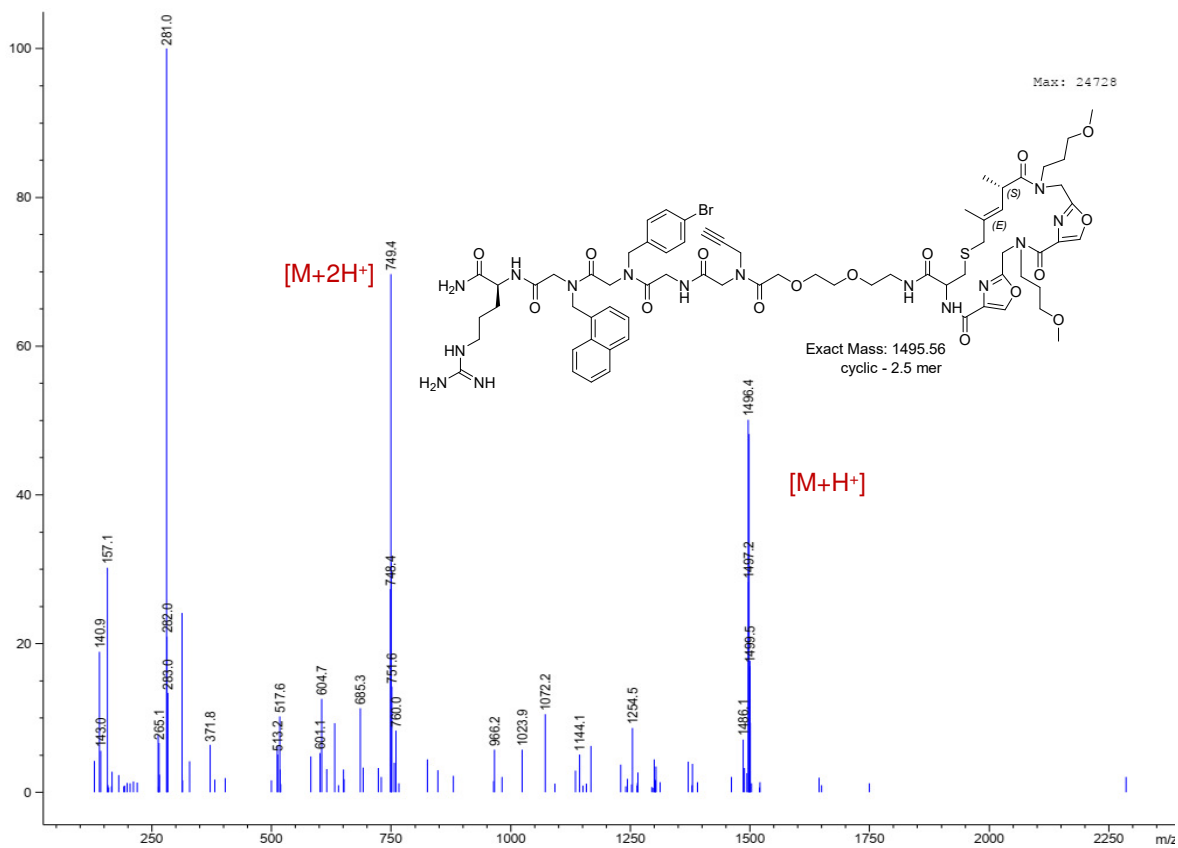

**R9-[DCC]:** Cyclization was complete on both 10um & 160um.

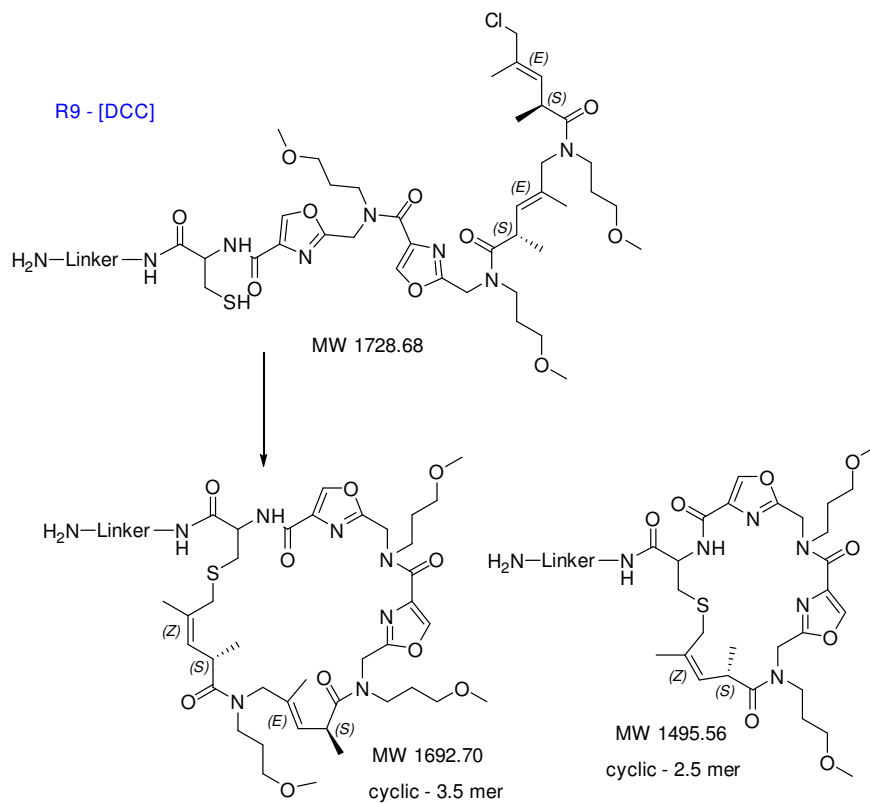

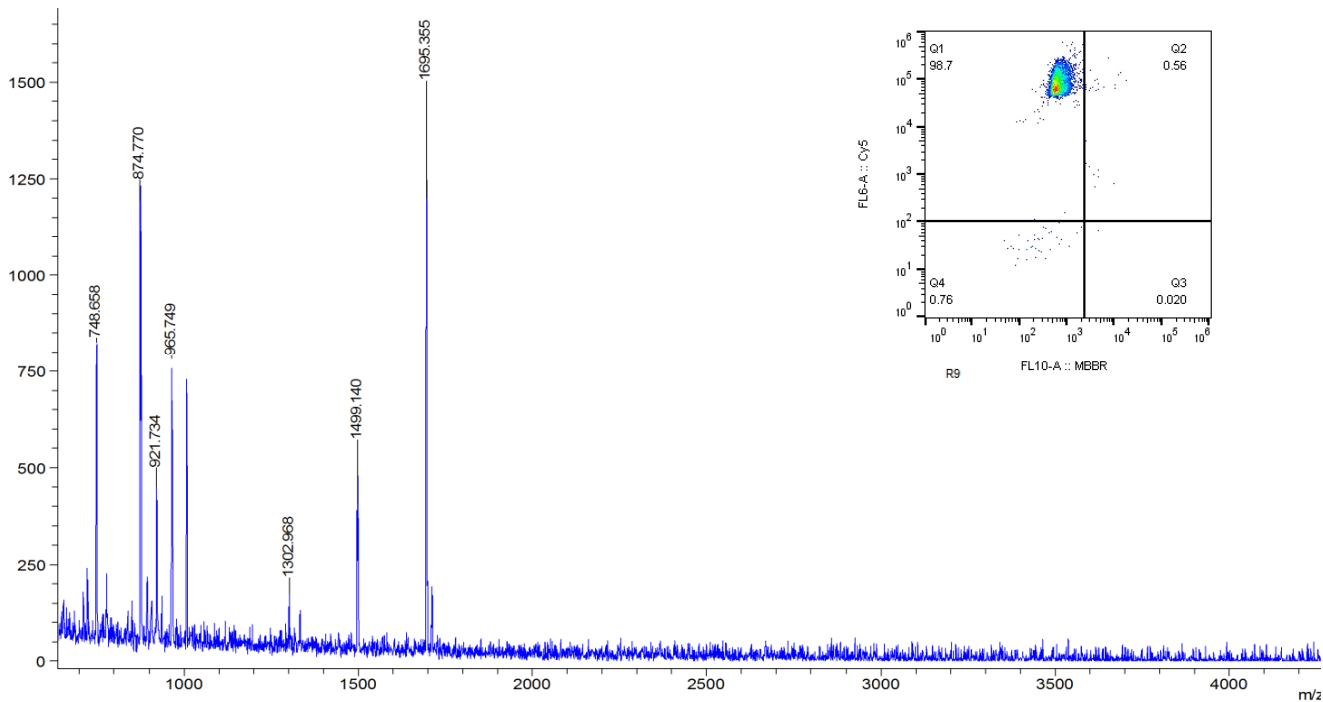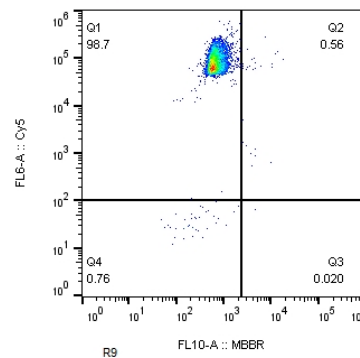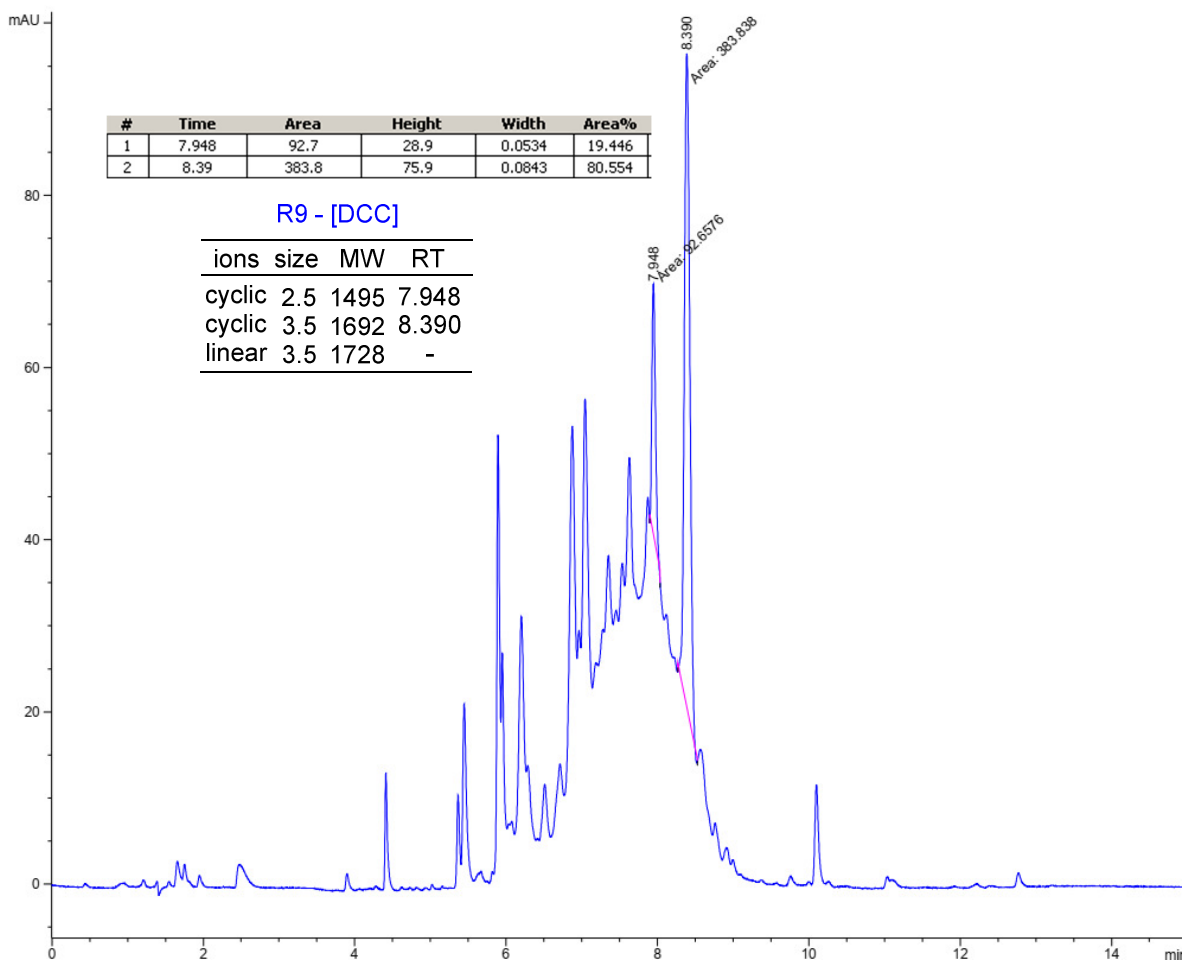

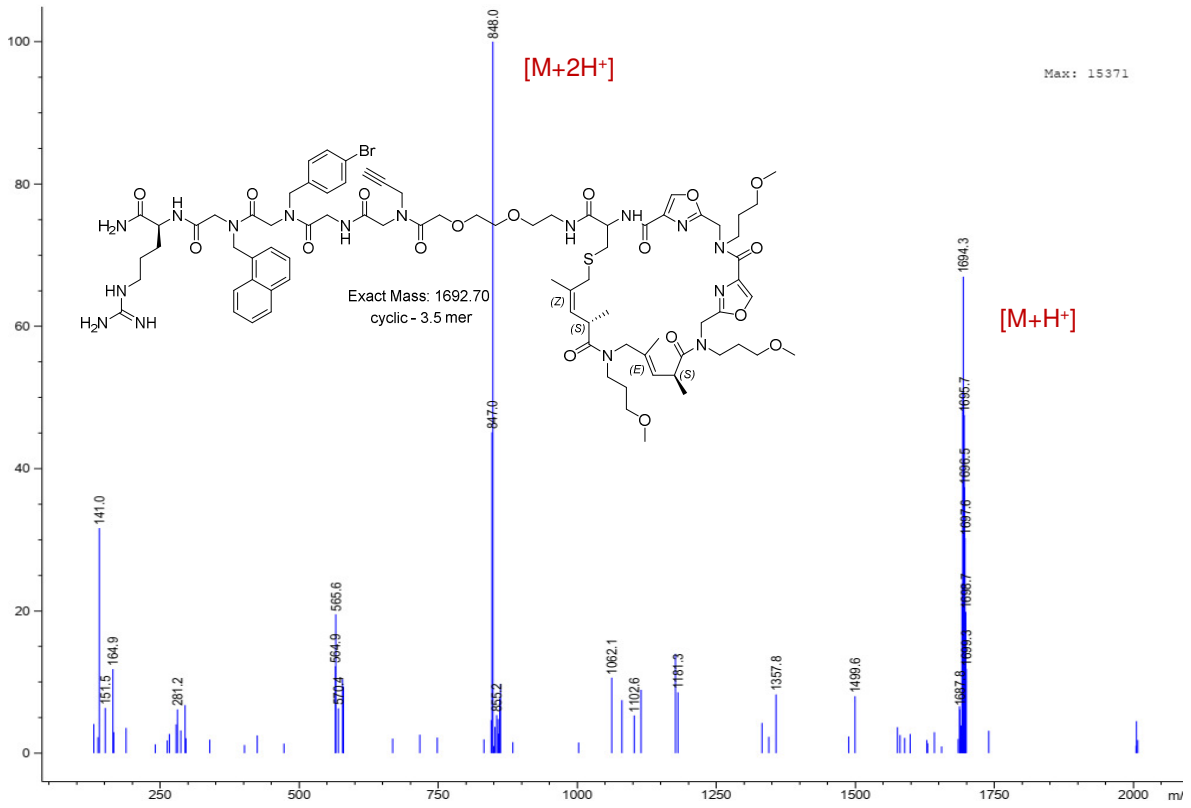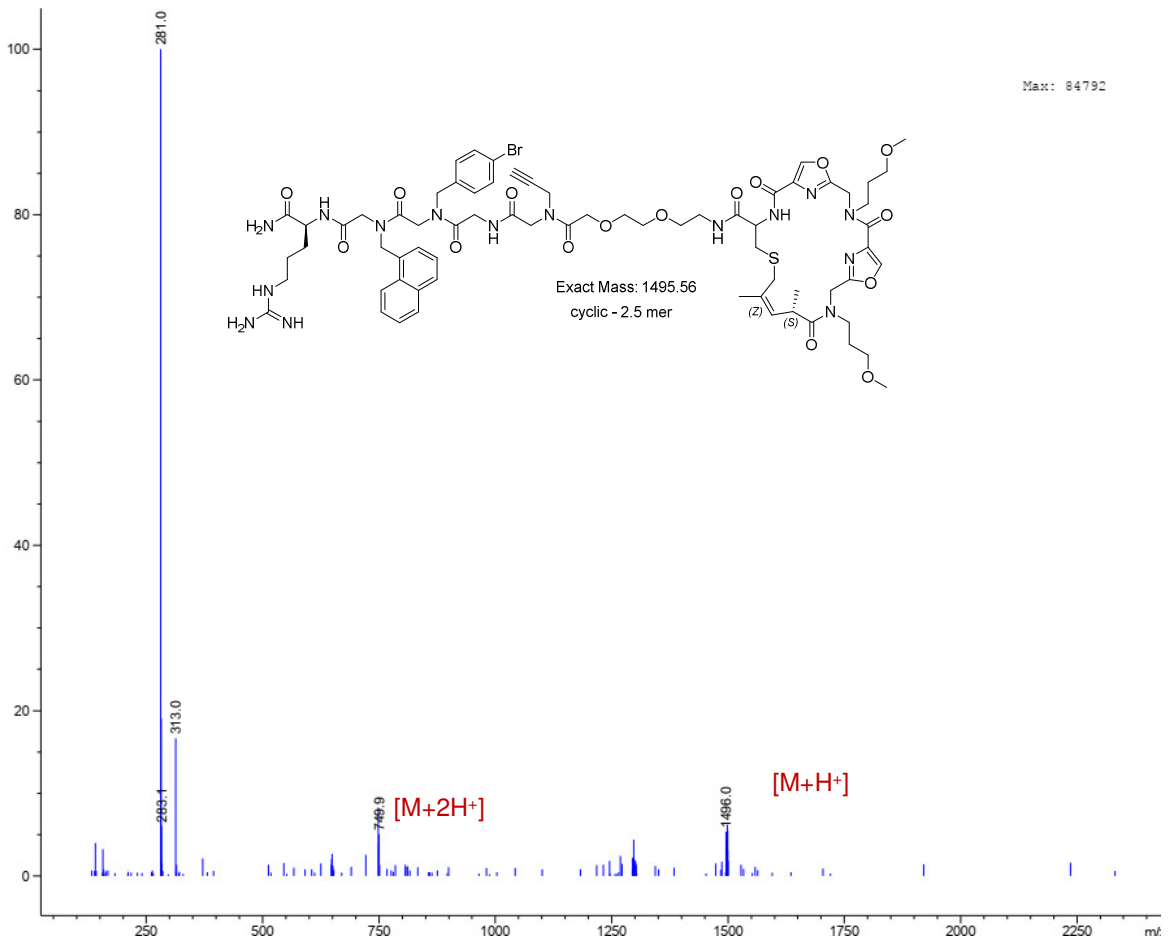

**R10-[DDC]:** Cyclization was complete on both 10um & 160um.

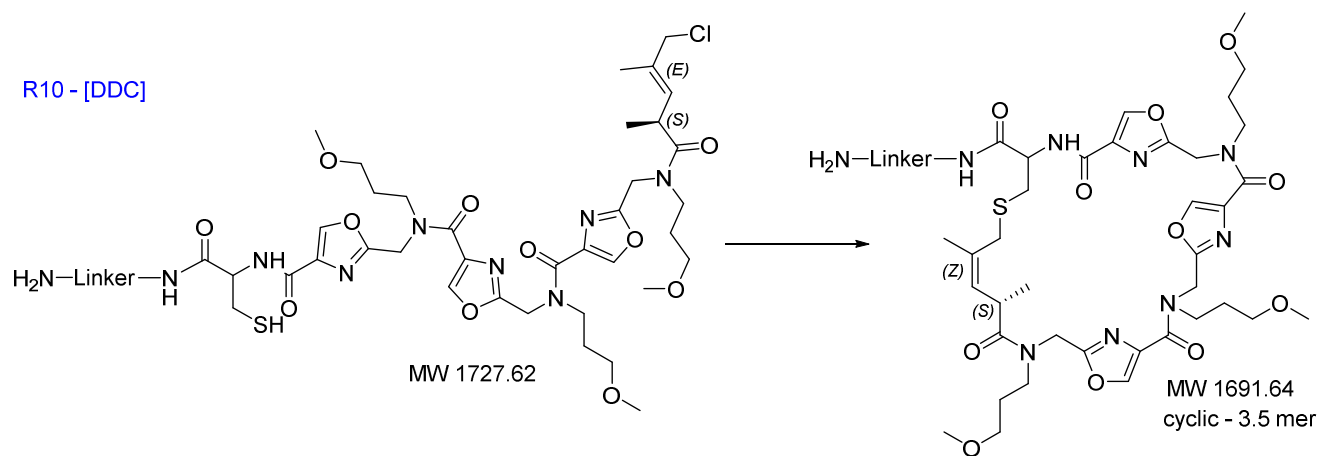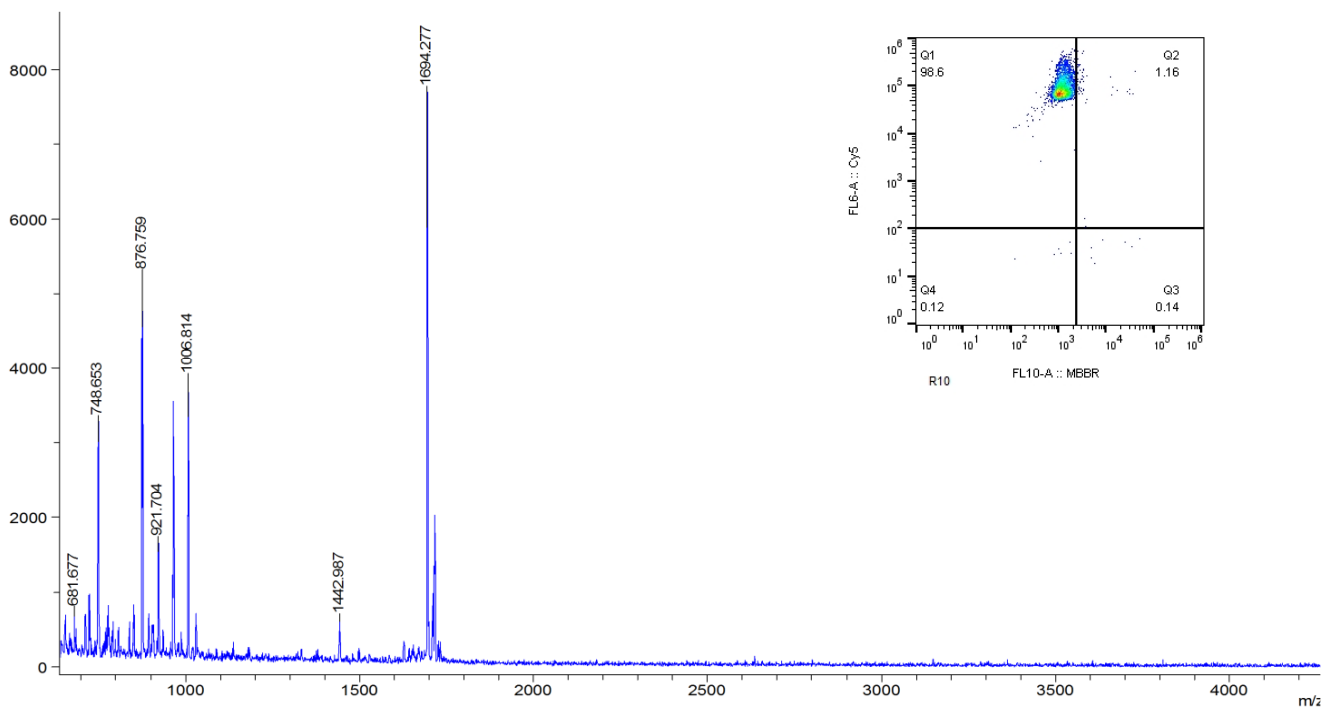





















| Entry | Molecular ID              | Copies | Amines (X1) | Amines (X1) smiles | Acids (X1) | Acids (X1) smiles | Amines (X2) | Amines (X2) smiles   | Acids (X2) | Acids (X2) smiles | Amines (X3) | Amines (X3) smiles | Acids (X3) | Acids (X3) smiles |
|-------|---------------------------|--------|-------------|--------------------|------------|-------------------|-------------|----------------------|------------|-------------------|-------------|--------------------|------------|-------------------|
| 228   | 13042431502306171023062   | 3      |             | NCCOC              |            | OC(=O)C(Cl)C(O)C  |             | NCC1=CC=C(C)C(F)F=C1 |            | OC(=O)C(Cl)C(O)C  |             | NCCO               |            | OC(=O)C(Cl)C(O)C  |
| 227   | 13042431502306171023062   | 3      |             | NCCOC              |            | OC(=O)C(Cl)C(O)C  |             | OC(=O)C(Cl)C(O)C     |            | OC(=O)C(Cl)C(O)C  |             | NCCO               |            | OC(=O)C(Cl)C(O)C  |
| 322   | 13124101501280171023063   | 2      |             | C1CN(C)N1          |            | OC(=O)C(Cl)C(O)C  |             |                      |            | OC(=O)C(Cl)C(O)C  |             | NCC1=CC=C(N)C=C1   |            | OC(=O)C(Cl)C(O)C  |
| 333   | 130124101501280171023063  | 2      |             | C1CN(C)N1          |            | OC(=O)C(Cl)C(O)C  |             |                      |            | OC(=O)C(Cl)C(O)C  |             | NCC1=CC=C(N)C=C1   |            | OC(=O)C(Cl)C(O)C  |
| 427   | 130224101501280171023068  | 2      |             | C1CN(C)N1          |            | OC(=O)C(Cl)C(O)C  |             |                      |            | OC(=O)C(Cl)C(O)C  |             | NCC1=CC=C(N)C=C1   |            | OC(=O)C(Cl)C(O)C  |
| 428   | 1302241015012810171023069 | 2      |             | C1CN(C)N1          |            | OC(=O)C(Cl)C(O)C  |             |                      |            | OC(=O)C(Cl)C(O)C  |             | NCC1=CC=C(N)C=C1   |            | OC(=O)C(Cl)C(O)C  |
| 429   | 1302241015012810171023068 | 2      |             | C1CN(C)N1          |            | OC(=O)C(Cl)C(O)C  |             |                      |            | OC(=O)C(Cl)C(O)C  |             | NCC1=CC=C(N)C=C1   |            | OC(=O)C(Cl)C(O)C  |
| 430   | 130224101502290171023062  | 2      |             | C1CN(C)N1          |            | OC(=O)C(Cl)C(O)C  |             |                      |            | OC(=O)C(Cl)C(O)C  |             | NCCO               |            | OC(=O)C(Cl)C(O)C  |
| 431   | 130224101502290171023063  | 2      |             | C1CN(C)N1          |            | OC(=O)C(Cl)C(O)C  |             |                      |            | OC(=O)C(Cl)C(O)C  |             | NCC1=CC=C(N)C=C1   |            | OC(=O)C(Cl)C(O)C  |
| 432   | 130224101502290171023063  | 2      |             | C1CN(C)N1          |            | OC(=O)C(Cl)C(O)C  |             |                      |            | OC(=O)C(Cl)C(O)C  |             | NCC1=CC=C(N)C=C1   |            | OC(=O)C(Cl)C(O)C  |
| 433   | 130224101502290171023068  | 2      |             | C1CN(C)N1          |            | OC(=O)C(Cl)C(O)C  |             |                      |            | OC(=O)C(Cl)C(O)C  |             | NCC1=CC=C(N)C=C1   |            | OC(=O)C(Cl)C(O)C  |
| 434   | 130224101502290171023062  | 2      |             | C1CN(C)N1          |            | OC(=O)C(Cl)C(O)C  |             |                      |            | OC(=O)C(Cl)C(O)C  |             | NCCO               |            | OC(=O)C(Cl)C(O)C  |
| 435   | 130224101502290171023064  | 2      |             | C1CN(C)N1          |            | OC(=O)C(Cl)C(O)C  |             |                      |            | OC(=O)C(Cl)C(O)C  |             | NCC1=CC=C(N)C=C1   |            | OC(=O)C(Cl)C(O)C  |
| 436   | 1302241015022901710230610 | 2      |             | C1CN(C)N1          |            | OC(=O)C(Cl)C(O)C  |             |                      |            | OC(=O)C(Cl)C(O)C  |             | NCC1=CC=C(N)C=C1   |            | OC(=O)C(Cl)C(O)C  |
| 517   | 130224101502290171023064  | 2      |             | C1CN(C)N1          |            | OC(=O)C(Cl)C(O)C  |             |                      |            | OC(=O)C(Cl)C(O)C  |             | NCC1=CC=C(N)C=C1   |            | OC(=O)C(Cl)C(O)C  |
| 566   | 130424101501280171023064  | 2      |             | C1CN(C)N1          |            | OC(=O)C(Cl)C(O)C  |             |                      |            | OC(=O)C(Cl)C(O)C  |             | NCC1=CC=C(N)C=C1   |            | OC(=O)C(Cl)C(O)C  |
| 567   | 130424101501280171023069  | 2      |             | C1CN(C)N1          |            | OC(=O)C(Cl)C(O)C  |             |                      |            | OC(=O)C(Cl)C(O)C  |             | NCC1=CC=C(N)C=C1   |            | OC(=O)C(Cl)C(O)C  |
| 568   | 130424101501280171023063  | 2      |             | C1CN(C)N1          |            | OC(=O)C(Cl)C(O)C  |             |                      |            | OC(=O)C(Cl)C(O)C  |             | NCC1=CC=C(N)C=C1   |            | OC(=O)C(Cl)C(O)C  |
| 569   | 130424101502290171023063  | 2      |             | C1CN(C)N1          |            | OC(=O)C(Cl)C(O)C  |             |                      |            | OC(=O)C(Cl)C(O)C  |             | NCC1=CC=C(N)C=C1   |            | OC(=O)C(Cl)C(O)C  |
| 560   | 130424101503290171023067  | 2      |             | C1CN(C)N1          |            | OC(=O)C(Cl)C(O)C  |             |                      |            | OC(=O)C(Cl)C(O)C  |             | NCC1=CC=C(N)C=C1   |            | OC(=O)C(Cl)C(O)C  |
| 561   | 130424101503290171023063  | 2      |             | C1CN(C)N1          |            | OC(=O)C(Cl)C(O)C  |             |                      |            | OC(=O)C(Cl)C(O)C  |             | NCC1=CC=C(N)C=C1   |            | OC(=O)C(Cl)C(O)C  |
| 562   | 130424101504290171023064  | 2      |             | C1CN(C)N1          |            | OC(=O)C(Cl)C(O)C  |             |                      |            | OC(=O)C(Cl)C(O)C  |             | NCC1=CC=C(N)C=C1   |            | OC(=O)C(Cl)C(O)C  |
| 563   | 130424101504290171023067  | 2      |             | C1CN(C)N1          |            | OC(=O)C(Cl)C(O)C  |             |                      |            | OC(=O)C(Cl)C(O)C  |             | NCC1=CC=C(N)C=C1   |            | OC(=O)C(Cl)C(O)C  |
| 564   | 130424101510290171023064  | 2      |             | C1CN(C)N1          |            | OC(=O)C(Cl)C(O)C  |             |                      |            | OC(=O)C(Cl)C(O)C  |             | NCC1=CC=C(N)C=C1   |            | OC(=O)C(Cl)C(O)C  |
| 327   | 130124081501280171023063  | 2      |             | N1CCN(C)C1         |            | OC(=O)C(Cl)C(O)C  |             |                      |            | OC(=O)C(Cl)C(O)C  |             | NCC1=CC=C(N)C=C1   |            | OC(=O)C(Cl)C(O)C  |
| 328   | 130124081502290171023063  | 2      |             | N1CCN(C)C1         |            | OC(=O)C(Cl)C(O)C  |             |                      |            | OC(=O)C(Cl)C(O)C  |             | NCC1=CC=C(N)C=C1   |            | OC(=O)C(Cl)C(O)C  |
| 329   | 130124081502290171023064  | 2      |             | N1CCN(C)C1         |            | OC(=O)C(Cl)C(O)C  |             |                      |            | OC(=O)C(Cl)C(O)C  |             | NCC1=CC=C(N)C=C1   |            | OC(=O)C(Cl)C(O)C  |
| 330   | 130124081504290171023064  | 2      |             | N1CCN(C)C1         |            | OC(=O)C(Cl)C(O)C  |             |                      |            | OC(=O)C(Cl)C(O)C  |             | NCC1=CC=C(N)C=C1   |            | OC(=O)C(Cl)C(O)C  |
| 331   | 130124081504290171023063  | 2      |             | N1CCN(C)C1         |            | OC(=O)C(Cl)C(O)C  |             |                      |            | OC(=O)C(Cl)C(O)C  |             | NCC1=CC=C(N)C=C1   |            | OC(=O)C(Cl)C(O)C  |
| 420   | 130224081501280171023061  | 2      |             | N1CCN(C)C1         |            | OC(=O)C(Cl)C(O)C  |             |                      |            | OC(=O)C(Cl)C(O)C  |             | NCC1=CC=C(N)C=C1   |            | OC(=O)C(Cl)C(O)C  |
| 421   | 130224081504290171023063  | 2      |             | N1CCN(C)C1         |            | OC(=O)C(Cl)C(O)C  |             |                      |            | OC(=O)C(Cl)C(O)C  |             | NCC1=CC=C(N)C=C1   |            | OC(=O)C(Cl)C(O)C  |
| 511   | 130324081502290171023063  | 2      |             | N1CCN(C)C1         |            | OC(=O)C(Cl)C(O)C  |             |                      |            | OC(=O)C(Cl)C(O)C  |             | NCC1=CC=C(N)C=C1   |            | OC(=O)C(Cl)C(O)C  |
| 512   | 130324081504290171023068  | 2      |             | N1CCN(C)C1         |            | OC(=O)C(Cl)C(O)C  |             |                      |            | OC(=O)C(Cl)C(O)C  |             | NCC1=CC=C(N)C=C1   |            | OC(=O)C(Cl)C(O)C  |
| 513   | 130324081504290171023064  | 2      |             | N1CCN(C)C1         |            | OC(=O)C(Cl)C(O)C  |             |                      |            | OC(=O)C(Cl)C(O)C  |             | NCC1=CC=C(N)C=C1   |            | OC(=O)C(Cl)C(O)C  |
| 514   | 130324081504290171023062  | 2      |             | N1CCN(C)C1         |            | OC(=O)C(Cl)C(O)C  |             |                      |            | OC(=O)C(Cl)C(O)C  |             | NCCO               |            | OC(=O)C(Cl)C(O)C  |
| 547   | 130424081504290171023063  | 2      |             | N1CCN(C)C1         |            | OC(=O)C(Cl)C(O)C  |             |                      |            | OC(=O)C(Cl)C(O)C  |             | NCC1=CC=C(N)C=C1   |            | OC(=O)C(Cl)C(O)C  |
| 518   | 131024031502290171023063  | 2      |             | NCC1=CC=C(F)C=C1   |            | OC(=O)C(Cl)C(O)C  |             |                      |            | OC(=O)C(Cl)C(O)C  |             | NCC1=CC=C(N)C=C1   |            | OC(=O)C(Cl)C(O)C  |
| 519   | 131024031504290171023064  | 2      |             | NCC1=CC=C(F)C=C1   |            | OC(=O)C(Cl)C(O)C  |             |                      |            | OC(=O)C(Cl)C(O)C  |             | NCC1=CC=C(N)C=C1   |            | OC(=O)C(Cl)C(O)C  |
| 520   | 131024031504290171023063  | 2      |             | NCC1=CC=C(F)C=C1   |            | OC(=O)C(Cl)C(O)C  |             |                      |            | OC(=O)C(Cl)C(O)C  |             | NCC1=CC=C(N)C=C1   |            | OC(=O)C(Cl)C(O)C  |
| 521   | 131024031506290171023063  | 2      |             | NCC1=CC=C(F)C=C1   |            | OC(=O)C(Cl)C(O)C  |             |                      |            | OC(=O)C(Cl)C(O)C  |             | NCC1=CC=C(N)C=C1   |            | OC(=O)C(Cl)C(O)C  |
| 283   | 130124071501280171023068  | 2      |             | NCC1=CC=C(Cl)C=C1  |            | OC(=O)C(Cl)C(O)C  |             |                      |            |                   |             |                    |            |                   |





Section-11: Analysis of Naive bead population: These beads are deep sequenced after DEL synthesis

| Entry | Molecular ID              | Copies | Amines (X1) | Amines (X1): smiles  | Acids (X1) | Acids (X1) smiles       | Amines (X2) | Amines (X2) smiles        | Acids (X2) | Acids (X2) smiles      | Amines (X3) | Amines (X3) smiles      | Acids (X3) | Acids (X3) smiles      |
|-------|---------------------------|--------|-------------|----------------------|------------|-------------------------|-------------|---------------------------|------------|------------------------|-------------|-------------------------|------------|------------------------|
| 1     | 130424081501260117022808  | 47     |             | N1CCNCCC1            |            | ClC(C)C=C(C)C(O)=O      |             | NCCOC                     |            | OC(C)=COC(C)N=O        |             | BrC1=CC=C(C)C=C1        |            | OC(C)C(O)C(O)=S        |
| 2     | 130124071501260717022810  | 44     |             | NCC1=CC=C(C)C=C1     |            | OC(C)=COC(C)N=O         |             | NCC1=CC=C(N)C=C1          |            | OC(C)=CSC(C)N=O        |             | NCC1=CC=C(C)C(C)C=C1    |            | OC(C)C(C)C(O)=CC=C1    |
| 4     | 1302241015032603171022804 | 37     |             | C1CNCCN1             |            | ClC(C)=C(C)C(O)=O=CC=C1 |             | NCC1=CC=C(S1)C=C1         |            | OC(C)=COC(C)N=O        |             | N(C)C(C)C1=CC=CC=C1 [R] |            | O=C(O)C1=C(C)C(O)C=C1  |
| 3     | 130224031504260517022802  | 37     |             | NCCOC                |            | ClC(C)=C(C)C(O)=O=CC=C1 |             | NCC(C)C(O)                |            | OC(C)=C=C(C)C(C)C=C1=O |             | NCCO                    |            | OC(C)C(C)C(O)=S        |
| 5     | 130324041504260417022804  | 33     |             | NCC=C                |            | OC(C)=CSC(C)N=O         |             | NCCNC(O)=O                |            | OC(C)=C=C(C)C(C)C=C1=O |             | N(C)C(C)C1=CC=CC=C1 [R] |            | CCC(O)=O               |
| 6     | 130424071502260917022805  | 31     |             | NCC1=CC=C(C)C=C1     |            | ClC(C)C=C(C)C(O)=O      |             | NCC1=CC(F)=C(C)C(F)F=C1   |            | OC(C)=CSC(C)N=O        |             | NCC1COC(C)=CC=C2=C2O1   |            | OC(C)C(C)C(O)=S        |
| 7     | 130424061502260517022802  | 25     |             | NCC1=CC=C(O)1        |            | ClC(C)C=C(C)C(O)=O      |             | NCC(C)C(O)                |            | OC(C)=C=C(C)C(C)C=C1=O |             | NCCO                    |            | OC(C)C(C)C(O)=S        |
| 8     | 131024021502261017022809  | 23     |             | NCC1=CC(F)=C(F)C=C1  |            | ClC(C)=C(C)C(O)=O=CC=C1 |             | NCC1=CC=C(C)C=C1          |            | ClC(C)C=C(C)C(O)=O     |             | NCC1CCOCC1              |            | ClC(C)C(C)C(O)=O=CC=C1 |
| 9     | 130224091506260317022803  | 19     |             | NCCCN1C=CN=C1        |            | ClC(C)=C(C)C(O)=O=CC=C1 |             | NCC1=CC=CC(C)C(F)F=C1     |            | ClC(C)C=C(C)C(O)=O     |             | NCCCN1C=CN=C1           |            | OC(C)C(C)C(O)=S        |
| 11    | 1309240315092602171022804 | 18     |             | NCC1C(C)C(C)1        |            | OC(C)=CSC(C)N=O         |             | NCC1=CC=CC(C)C(F)F=C1     |            | ClC(C)C=C(C)C(O)=O     |             | N(C)C(C)C1=CC=CC=C1 [S] |            | O=C(O)C1=C(C)C(O)C=C1  |
| 10    | 130124041506260317022804  | 18     |             | NCC=C                |            | OC(C)=COC(C)N=O         |             | NCC1=CC=CC(C)C(F)F=C1     |            | ClC(C)C=C(C)C(O)=O     |             | NCC1=CC=C(O)1           |            | ClC(C)C(C)C(O)=O=CC=C1 |
| 12    | 1301240715012604171022804 | 17     |             | NCC1=CC=C(C)C=C1     |            | OC(C)=COC(C)N=O         |             | NCCNC(O)=O                |            | OC(C)=C=C(C)C(C)C=C1=O |             | N(C)C(C)C1=CC=CC=C1 [S] |            | O=C(O)C1=C(C)C(O)C=C1  |
| 13    | 130224031503260417022804  | 16     |             | NCCOC                |            | ClC(C)=C(C)C(O)=O=CC=C1 |             | NCCNC(O)=O                |            | OC(C)=C=C(C)C(C)C=C1=O |             | N(C)C(C)C1=CC=CC=C1 [R] |            | CCC(O)=O               |
| 14    | 1310240215012604171022804 | 16     |             | NCC1=CC(F)=C(F)C=C1  |            | ClC(C)=C(C)C(O)=O=CC=C1 |             | NCCNC(O)=O                |            | OC(C)=C=C(C)C(C)C=C1=O |             | N(C)C(C)C1=CC=CC=C1 [S] |            | O=C(O)C1=C(C)C(O)C=C1  |
| 15    | 1301240615092601171022804 | 15     |             | NCC1=CC=C(O)1        |            | OC(C)=COC(C)N=O         |             | NCC1=CC=CC(C)C(F)F=C1     |            | ClC(C)C=C(C)C(O)=O     |             | N(C)C(C)C1=CC=CC=C1 [S] |            | O=C(O)C1=C(C)C(O)C=C1  |
| 16    | 130124071510260417022803  | 16     |             | NCC1=CC=C(C)C=C1     |            | OC(C)=COC(C)N=O         |             | CC(C)CN                   |            | ClC(C)C=C(C)C(O)=O     |             | NCCCN1C=CN=C1           |            | OC(C)C(C)C(O)=S        |
| 17    | 13012401510260317022804   | 14     |             | C1CNCCN1             |            | OC(C)=C(C)C(C)N=O       |             | CC(C)CN                   |            | ClC(C)C=C(C)C(O)=O     |             | N(C)C(C)C1=CC=CC=C1 [R] |            | CCC(O)=O               |
| 18    | 13022401510260317022803   | 14     |             | C1CNCCN1             |            | ClC(C)=C(C)C(O)=O=CC=C1 |             | CC(C)CN                   |            | ClC(C)C=C(C)C(O)=O     |             | NCCCN1C=CN=C1           |            | OC(C)C(C)C(O)=S        |
| 19    | 1302240215012604170422806 | 13     |             | NCC1=CC=CN=C1        |            | ClC(C)=C(C)C(O)=O=CC=C1 |             | NCCNC(O)=O                |            | OC(C)=C=C(C)C(C)C=C1=O |             | N(C)C(C)C1=CC=CC=C1     |            | OC(C)C(C)C(O)=O [R]    |
| 23    | 130224031510260417022804  | 12     |             | NCCOC                |            | ClC(C)=C(C)C(O)=O=CC=C1 |             | CC(C)CN                   |            | ClC(C)C=C(C)C(O)=O     |             | N(C)C(C)C1=CC=CC=C1 [R] |            | CCC(O)=O               |
| 22    | 1301240615042604171022804 | 12     |             | N1CCNCCC1            |            | OC(C)=COC(C)N=O         |             | NCCNC(O)=O                |            | OC(C)=C=C(C)C(C)C=C1=O |             | N(C)C(C)C1=CC=CC=C1 [S] |            | O=C(O)C1=C(C)C(O)C=C1  |
| 26    | 130424031510260317022803  | 12     |             | NCCOC                |            | ClC(C)C=C(C)C(O)=O      |             | CC(C)CN                   |            | ClC(C)C=C(C)C(O)=O     |             | NCCCN1C=CN=C1           |            | OC(C)C(C)C(O)=S        |
| 21    | 130124001502261017042603  | 12     |             | N1CCNCCC1            |            | OC(C)=COC(C)N=O         |             | NCC1=CC=C(C)C=C1          |            | ClC(C)C=C(C)C(O)=O     |             | NCCCN1C=CN=C1           |            | OC(C)C(C)C(O)=O [R]    |
| 20    | 130124051502260417042803  | 12     |             | NCC1=CC=C(C)C(C)C=C1 |            | OC(C)=COC(C)N=O         |             | NCCNC(O)=O                |            | OC(C)=C=C(C)C(C)C=C1=O |             | NCCCN1C=CN=C1           |            | OC(C)C(C)C(O)=O [R]    |
| 24    | 130324101501260417022803  | 12     |             | C1CNCCN1             |            | OC(C)=CSC(C)N=O         |             | NCCNC(O)=O                |            | OC(C)=C=C(C)C(C)C=C1=O |             | NCCCN1C=CN=C1           |            | ClC(C)C(C)C(O)=O=CC=C1 |
| 25    | 130424011503260517022802  | 12     |             | NCC1=CC=C(Br)C=C1    |            | ClC(C)C=C(C)C(O)=O      |             | NCC(C)C(O)                |            | OC(C)=C=C(C)C(C)C=C1=O |             | NCCO                    |            | OC(C)C(C)C(O)=S        |
| 29    | 130424031506260317022804  | 11     |             | NCCOC                |            | ClC(C)C=C(C)C(O)=O      |             | NCC1=CC=CC(C)C(F)F=C1     |            | ClC(C)C=C(C)C(O)=O     |             | N(C)C(C)C1=CC=CC=C1 [R] |            | CCC(O)=O               |
| 28    | 130424031504260817022803  | 11     |             | NCCOC                |            | ClC(C)C=C(C)C(O)=O      |             | N(C)C(C)C1=CC=CC=C1       |            | OC(C)=CSC(C)N=O        |             | NCCCN1C=CN=C1           |            | ClC(C)C(C)C(O)=O=CC=C1 |
| 27    | 130124031504260417022803  | 11     |             | NCCOC                |            | OC(C)=COC(C)N=O         |             | NCCNC(O)=O                |            | OC(C)=C=C(C)C(C)C=C1=O |             | NCCCN1C=CN=C1           |            | OC(C)C(C)C(O)=S        |
| 30    | 1310240215012602170122806 | 11     |             | NCC1=CC(F)=C(F)C=C1  |            | ClC(C)=C(C)C(O)=O=CC=C1 |             | NCC1=CC=C(Br)C(C)C=C1     |            | OC(C)=COC(C)N=O        |             | BrC1=CC=C(C)C=C1        |            | OC(C)=CSC(C)N=O        |
| 32    | 130124051506260317022807  | 10     |             | NCC1=CC=C(C)C(C)C=C1 |            | OC(C)=COC(C)N=O         |             | NCC1=CC=CC(C)C(F)F=C1     |            | ClC(C)C=C(C)C(O)=O     |             | NCC1=CC(C)C(C)C=C1      |            | OC(C)C(C)C(O)=S        |
| 33    | 130124071502260417022803  | 10     |             | NCC1=CC=C(C)C=C1     |            | OC(C)=COC(C)N=O         |             | NCCNC(O)=O                |            | OC(C)=C=C(C)C(C)C=C1=O |             | N(C)C(C)C1=CC=CC=C1 [R] |            | OC(C)C(C)C(O)=S        |
| 34    | 1303240315062602171022804 | 10     |             | NCCOC                |            | OC(C)=CSC(C)N=O         |             | NCC1=CC=CC(C)C(F)F=C1     |            | ClC(C)C=C(C)C(O)=O     |             | N(C)C(C)C1=CC=CC=C1 [S] |            | O=C(O)C1=C(C)C(O)C=C1  |
| 36    | 130324101502260217022803  | 10     |             | C1CNCCN1             |            | OC(C)=CSC(C)N=O         |             | NCC1=CC=C(S(=O)(=O)C)C=C1 |            | OC(C)=COC(C)N=O        |             | NCCCN1C=CN=C1           |            | ClC(C)C(C)C(O)=O=CC=C1 |

| Entry | Molecular ID              | Copies | Amines (X1) | Amines (X1): smiles                  | Acids (X1) | Acids (X1) smiles                     | Amines (X2) | Amines (X2) smiles                     | Acids (X2) | Acids (X2) smiles                   | Amines (X3) | Amines (X3) smiles                     | Acids (X3) | Acids (X3) smiles                   |
|-------|---------------------------|--------|-------------|--------------------------------------|------------|---------------------------------------|-------------|----------------------------------------|------------|-------------------------------------|-------------|----------------------------------------|------------|-------------------------------------|
| 35    | 130324051503260117022803  | 10     |             | <chem>NCC1=CC=C(C)OC(O)C2=C1</chem>  |            | <chem>OC(C1=CSC(C(C)N)N)=O</chem>     |             | <chem>NCCOC</chem>                     |            | <chem>OC(C1=COG(C(C)N)N)=O</chem>   |             | <chem>NCCCN1C=CN=C1</chem>             |            | <chem>OCC1=CC(C(O)=O)=CC=C1</chem>  |
| 37    | 1304240515042609417022804 | 10     |             | <chem>NCC1=CC=C(C)OC(O)C2=C1</chem>  |            | <chem>ClC(C)C=C(C)C(O)C(O)=O</chem>   |             | <chem>NCC1=CC(F)=C(C(F)F)F=C1</chem>   |            | <chem>OC(C1=CSC(C)N)N)=O</chem>     |             | <chem>NCC1=CC=C(O)C=C1</chem>          |            | <chem>OCC1=CC(C(O)=O)=CC=C1</chem>  |
| 31    | 130124051502260417022804  | 10     |             | <chem>NCC1=CC=C(C)OC(O)C2=C1</chem>  |            | <chem>OC(C1=COG(C(C)N)N)=O</chem>     |             | <chem>NCCNG(C)=O</chem>                |            | <chem>OC(C1=CC=C(C)C)C=C1=O</chem>  |             | <chem>NCC1=CC=C(O)C=C1</chem>          |            | <chem>OCC1=CC(C(O)=O)=CC=C1</chem>  |
| 38    | 130124031502261017022803  | 9      |             | <chem>NCCOC</chem>                   |            | <chem>OC(C1=COG(C(C)N)N)=O</chem>     |             | <chem>NCC1=CC=C(C)C=C1</chem>          |            | <chem>ClC(C)C=C(C)C(O)C(O)=O</chem> |             | <chem>N(C@H)C(C)C1=CC=CC=C1 [R]</chem> |            | <chem>OCC(C@H)C(C)C(O)=O [S]</chem> |
| 45    | 130924031504260417022804  | 9      |             | <chem>NCC1CCOCC1</chem>              |            | <chem>OC(C1=CSC(C)N)N)=O</chem>       |             | <chem>NCCNC(O)=O</chem>                |            | <chem>OC(C1=CC=C(C)C)C=C1=O</chem>  |             | <chem>N(C@H)C(C)C1=CC=CC=C1 [R]</chem> |            | <chem>CC(O)C=O</chem>               |
| 40    | 1302240150109260171022804 | 9      |             | <chem>C1CNCCN1</chem>                |            | <chem>ClC(C)C=C(C)C(O)=O=CC=C1</chem> |             | <chem>NCC1=CC=C(C(F)F)F=C1</chem>      |            | <chem>ClC(C)C=C(C)C(O)C(O)=O</chem> |             | <chem>N(C@H)C(C)C1=CC=CC=C1 [S]</chem> |            | <chem>O=C(O)C1=C(C)OC=C1</chem>     |
| 41    | 1303240151022603171022804 | 9      |             | <chem>C1CNCCN1</chem>                |            | <chem>OC(C1=CSC(C)N)N)=O</chem>       |             | <chem>CC(C)CN</chem>                   |            | <chem>ClC(C)C=C(C)C(O)C(O)=O</chem> |             | <chem>N(C@H)C(C)C1=CC=CC=C1 [S]</chem> |            | <chem>O=C(O)C1=C(C)OC=C1</chem>     |
| 42    | 130424031509260217022803  | 9      |             | <chem>NCCOC</chem>                   |            | <chem>ClC(C)C=C(C)C(O)C(O)=O</chem>   |             | <chem>NCC1=CC=C(C(F)F)F=C1</chem>      |            | <chem>ClC(C)C=C(C)C(O)C(O)=O</chem> |             | <chem>NCCCN1C=CN=C1</chem>             |            | <chem>OCC(C@H)C(C)C(O)=O [S]</chem> |
| 43    | 130424081503260717022803  | 9      |             | <chem>N1CCNCCC1</chem>               |            | <chem>ClC(C)C=C(C)C(O)C(O)=O</chem>   |             | <chem>NCC1=CC=C(N)C=C1</chem>          |            | <chem>OC(C1=CSC(C)N)N)=O</chem>     |             | <chem>NCCCN1C=CN=C1</chem>             |            | <chem>OCC(C@H)C(C)C(O)=O [S]</chem> |
| 44    | 1309240315012609117022804 | 9      |             | <chem>NCC1CCOCC1</chem>              |            | <chem>OC(C1=CSC(C)N)N)=O</chem>       |             | <chem>NCC1=CC(F)=C(C(F)F)F=C1</chem>   |            | <chem>ClC(C)C=C(C)C(O)C(O)=O</chem> |             | <chem>NCC1=CC=C(O)C=C1</chem>          |            | <chem>OCC(C@H)C(C)C(O)=O [S]</chem> |
| 39    | 130124091501261017022802  | 9      |             | <chem>NCCCN1C=CN=C1</chem>           |            | <chem>OC(C1=COG(C(C)N)N)=O</chem>     |             | <chem>NCC1=CC=C(C)C=C1</chem>          |            | <chem>ClC(C)C=C(C)C(O)C(O)=O</chem> |             | <chem>NCCO</chem>                      |            | <chem>OCC(C@H)C(C)C(O)=O [S]</chem> |
| 46    | 130124031503260417022804  | 8      |             | <chem>NCCOC</chem>                   |            | <chem>OC(C1=COG(C(C)N)N)=O</chem>     |             | <chem>NCCNC(O)=O</chem>                |            | <chem>OC(C1=CC=C(C)C)C=C1=O</chem>  |             | <chem>N(C@H)C(C)C1=CC=CC=C1 [R]</chem> |            | <chem>CC(O)C=O</chem>               |
| 49    | 130124051503260617022804  | 8      |             | <chem>NCC1=CC=C(C)OC(O)C2=C1</chem>  |            | <chem>OC(C1=COG(C(C)N)N)=O</chem>     |             | <chem>NCC1=CC=C(C)C=C1</chem>          |            | <chem>OC(C1=CC=C(C)C)C=C1=O</chem>  |             | <chem>N(C@H)C(C)C1=CC=CC=C1 [R]</chem> |            | <chem>CC(O)C=O</chem>               |
| 59    | 1304240815092603171022804 | 8      |             | <chem>N1CCNCCC1</chem>               |            | <chem>ClC(C)C=C(C)C(O)C(O)=O</chem>   |             | <chem>NCC1=CC=CC(C(F)F)F=C1</chem>     |            | <chem>ClC(C)C=C(C)C(O)C(O)=O</chem> |             | <chem>N(C@H)C(C)C1=CC=CC=C1 [S]</chem> |            | <chem>O=C(O)C1=C(C)OC=C1</chem>     |
| 48    | 1301240515012610171022804 | 8      |             | <chem>NCC1=CC=C(C)OC(O)C2=C1</chem>  |            | <chem>OC(C1=COG(C(C)N)N)=O</chem>     |             | <chem>NCC1=CC=C(C)C=C1</chem>          |            | <chem>ClC(C)C=C(C)C(O)C(O)=O</chem> |             | <chem>N(C@H)C(C)C1=CC=CC=C1 [R]</chem> |            | <chem>O=C(O)C1=C(C)OC=C1</chem>     |
| 63    | 1309240714912605171022804 | 8      |             | <chem>NCC1=CC=C(C)C=C1</chem>        |            | <chem>OC(C1=CSC(C)N)N)=O</chem>       |             | <chem>NCC(C)C(O)C</chem>               |            | <chem>OC(C1=CC=C(C)C)C=C1=O</chem>  |             | <chem>N(C@H)C(C)C1=CC=CC=C1 [S]</chem> |            | <chem>O=C(O)C1=C(C)OC=C1</chem>     |
| 55    | 130424031504260617022803  | 8      |             | <chem>NCCOC</chem>                   |            | <chem>ClC(C)C=C(C)C(O)C(O)=O</chem>   |             | <chem>NCC1=CC=C(C)C=C1</chem>          |            | <chem>ClC(C)C=C(C)C(O)C(O)=O</chem> |             | <chem>NCCCN1C=CN=C1</chem>             |            | <chem>OCC(C@H)C(C)C(O)=O [S]</chem> |
| 58    | 130424071502260217022803  | 8      |             | <chem>NCC1=CC=C(C)C=C1</chem>        |            | <chem>ClC(C)C=C(C)C(O)C(O)=O</chem>   |             | <chem>NCC1=CC=C(S(=O)(=O)C)C=C1</chem> |            | <chem>OC(C1=COG(C(C)N)N)=O</chem>   |             | <chem>NCCCN1C=CN=C1</chem>             |            | <chem>OCC1=CC(C(O)=O)=CC=C1</chem>  |
| 60    | 130424091504260617022803  | 8      |             | <chem>NCCCN1C=CN=C1</chem>           |            | <chem>OC(C)C=C(C)C(O)C(O)=O</chem>    |             | <chem>ClC(C)C=C(C)C(O)C(O)=O</chem>    |            | <chem>OC(C1=CC=C(C)C)C=C1=O</chem>  |             | <chem>NCCCN1C=CN=C1</chem>             |            | <chem>OCC1=CC(C(O)=O)=CC=C1</chem>  |
| 57    | 130424051502260417022803  | 8      |             | <chem>NCC1=CC=C(C)OC(O)C2=C1</chem>  |            | <chem>ClC(C)C=C(C)C(O)C(O)=O</chem>   |             | <chem>NCCNC(O)=O</chem>                |            | <chem>OC(C1=CC=C(C)C)C=C1=O</chem>  |             | <chem>NCCCN1C=CN=C1</chem>             |            | <chem>OCC(C@H)C(C)C(O)=O [S]</chem> |
| 52    | 130224041504260717022803  | 8      |             | <chem>NCC=C</chem>                   |            | <chem>OCC1=CC(C(O)=O)=CC=C1</chem>    |             | <chem>NCC1=CC=C(N)C=C1</chem>          |            | <chem>ClC(C)C=C(C)C(O)C(O)=O</chem> |             | <chem>NCCCN1C=CN=C1</chem>             |            | <chem>OCC1=CC(C(O)=O)=CC=C1</chem>  |
| 50    | 130124051509260317022803  | 8      |             | <chem>NCC1=CC=C(C)OC(O)C2=C1</chem>  |            | <chem>OC(C1=COG(C(C)N)N)=O</chem>     |             | <chem>NCC1=CC=C(C(F)F)F=C1</chem>      |            | <chem>ClC(C)C=C(C)C(O)C(O)=O</chem> |             | <chem>NCCCN1C=CN=C1</chem>             |            | <chem>OCC1=CC(C(O)=O)=CC=C1</chem>  |
| 61    | 13042401501260517022809   | 8      |             | <chem>C1CNCCN1</chem>                |            | <chem>ClC(C)C=C(C)C(O)C(O)=O</chem>   |             | <chem>NCC1=CC=C(O)C=C1</chem>          |            | <chem>OC(C1=CC=C(C)C)C=C1=O</chem>  |             | <chem>NCC1CCOCC1</chem>                |            | <chem>OCC(C@H)C(C)C(O)=O [R]</chem> |
| 56    | 130424031504260917022809  | 8      |             | <chem>NCCOC</chem>                   |            | <chem>ClC(C)C=C(C)C(O)C(O)=O</chem>   |             | <chem>NCC1=CC(F)=C(C(F)F)F=C1</chem>   |            | <chem>OC(C1=CSC(C)N)N)=O</chem>     |             | <chem>NCC1CCOCC1</chem>                |            | <chem>OCC1=CC(C(O)=O)=CC=C1</chem>  |
| 47    | 130124031504260817022809  | 8      |             | <chem>NCCOC</chem>                   |            | <chem>OC(C1=COG(C(C)N)N)=O</chem>     |             | <chem>N(C@H)C(C)C1=CC=CC=C1</chem>     |            | <chem>OC(C1=CSC(C)N)N)=O</chem>     |             | <chem>NCC1CCOCC1</chem>                |            | <chem>OCC(C@H)C(C)C(O)=O [S]</chem> |
| 54    | 130424031504260517022802  | 8      |             | <chem>NCCOC</chem>                   |            | <chem>ClC(C)C=C(C)C(O)C(O)=O</chem>   |             | <chem>NCC(C)C(O)C</chem>               |            | <chem>OC(C1=CC=C(C)C)C=C1=O</chem>  |             | <chem>NCCO</chem>                      |            | <chem>OCC(C@H)C(C)C(O)=O [S]</chem> |
| 51    | 130224031502260817022802  | 8      |             | <chem>NCCOC</chem>                   |            | <chem>ClC(C)C=C(C)C(O)=O=CC=C1</chem> |             | <chem>N(C@H)C(C)C1=CC=CC=C1</chem>     |            | <chem>OC(C1=CSC(C)N)N)=O</chem>     |             | <chem>NCCO</chem>                      |            | <chem>OCC1=CC(C(O)=O)=CC=C1</chem>  |
| 66    | 130424071502260317022805  | 7      |             | <chem>NCC1=CC=C(C)C=C1</chem>        |            | <chem>ClC(C)C=C(C)C(O)C(O)=O</chem>   |             | <chem>NCC1=CC=CS1</chem>               |            | <chem>ClC(C)C=C(C)C(O)C(O)=O</chem> |             | <chem>NCC1COCC(C=C=C2)C2=O1</chem>     |            | <chem>OCC(C@H)C(C)C(O)=O [S]</chem> |
| 70    | 130924041501260417022804  | 7      |             | <chem>NCC1CCOCC1</chem>              |            | <chem>ClC(C)C=C(C)C(O)C(O)=O</chem>   |             | <chem>NCCNC(O)=O</chem>                |            | <chem>OC(C1=CC=C(C)C)C=C1=O</chem>  |             | <chem>N(C@H)C(C)C1=CC=CC=C1 [R]</chem> |            | <chem>CC(O)C=O</chem>               |
| 63    | 130124071502260917022804  | 7      |             | <chem>NCC1=CC=C(C)C=C1</chem>        |            | <chem>OC(C1=COG(C(C)N)N)=O</chem>     |             | <chem>NCC1=CC=C(O)C=C1</chem>          |            | <chem>OC(C1=CC=C(C)C)C=C1=O</chem>  |             | <chem>N(C@H)C(C)C1=CC=CC=C1 [R]</chem> |            | <chem>CC(O)C=O</chem>               |
| 71    | 1310240215032604171022804 | 7      |             | <chem>NCC1=CC(F)=C(C(F)F)C=C1</chem> |            | <chem>ClC(C)C=C(C)C(O)=O=CC=C1</chem> |             | <chem>NCCNC(O)=O</chem>                |            | <chem>OC(C1=CC=C(C)C)C=C1=O</chem>  |             | <chem>N(C@H)C(C)C1=CC=CC=C1 [S]</chem> |            | <chem>O=C(O)C1=C(C)OC=C1</chem>     |
| 65    | 130424031501261017022803  | 7      |             | <chem>NCCOC</chem>                   |            | <chem>ClC(C)C=C(C)C(O)C(O)=O</chem>   |             | <chem>NCC1=CC=C(C)C=C1</chem>          |            | <chem>ClC(C)C=C(C)C(O)C(O)=O</chem> |             | <chem>NCCCN1C=CN=C1</chem>             |            | <chem>OCC1=CC(C(O)=O)=CC=C1</chem>  |
| 67    | 130424071509260417022803  | 7      |             | <chem>NCC1=CC=C(C)C=C1</chem>        |            | <chem>ClC(C)C=C(C)C(O)C(O)=O</chem>   |             | <chem>NCC1=CC=C(C(F)F)F=C1</chem>      |            | <chem>ClC(C)C=C(C)C(O)C(O)=O</chem> |             | <chem>NCCCN1C=CN=C1</chem>             |            | <chem>OCC(C@H)C(C)C(O)=O [S]</chem> |
| 68    | 130424091502260317022803  | 7      |             | <chem>NCCCN1C=CN=C1</chem>           |            | <chem>ClC(C)C=C(C)C(O)C(O)=O</chem>   |             | <chem>NCC1=CC=CS1</chem>               |            | <chem>OC(C1=COG(C(C)N)N)=O</chem>   |             | <chem>NCCCN1C=CN=C1</chem>             |            | <chem>OCC(C@H)C(C)C(O)=O [S]</chem> |

| Entry | Molecular ID              | Copies | Amines (X1) | Amines (X1)- smiles  | Acids (X1) | Acids (X1) smiles          | Amines (X2) | Amines (X2) smiles        | Acids (X2) | Acids (X2) smiles          | Amines (X3) | Amines (X3) smiles    | Acids (X3) | Acids (X3) smiles       |
|-------|---------------------------|--------|-------------|----------------------|------------|----------------------------|-------------|---------------------------|------------|----------------------------|-------------|-----------------------|------------|-------------------------|
| 62    | 130124031502260217032803  | 7      |             | NCCCO                |            | OC(C1=CC(C(=O)N1)=O        |             | NCC1=CC=C(S(=O)(=O)C)C=C1 |            | OC(C1=CC(C(=O)N1)=O        |             | NCCCN1C=CN=C1         |            | OC([C@H](C)C)C(=O)S     |
| 66    | 139824011501260717042803  | 7      |             | NCC1CCOCC1           |            | OC(C1=CSC(C(=O)N1)=O       |             | NCC1=CC=C(N(C)C)C=C1      |            | OC(C1=CSC(C(=O)N1)=O       |             | NCCCN1C=CN=C1         |            | OC([C@H](C)C)C(=O)S     |
| 64    | 130324051504260817032803  | 7      |             | NCC1=CC=C(C(=O)C2=C1 |            | OC(C1=CSC(C(=O)N1)=O       |             | NCC1=CC=C(C(=O)C=C1       |            | OC(C1=CSC(C(=O)N1)=O       |             | NCCCN1C=CN=C1         |            | OC([C@H](C)C)C(=O)S     |
| 84    | 130424031503260517032804  | 6      |             | NCCCO                |            | ClC(C)C=C([C@H](C)C)C(=O)O |             | NCC(C)C(=O)O              |            | OC(C1=CC=C(C(=O)C)C=C1)=O  |             | NCC1=CC=C(C(=O)C)C=C1 |            | CC(C)C(=O)O             |
| 85    | 130424051506260217032804  | 6      |             | NCC1=CC=C(C(=O)C2=C1 |            | ClC(C)C=C([C@H](C)C)C(=O)O |             | NCC1=CC=C(C(F)F)C=C1      |            | ClC(C)C=C([C@H](C)C)C(=O)O |             | NCC1=CC=C(C(=O)C)C=C1 |            | CC(C)C(=O)O             |
| 75    | 130124071502260317032804  | 6      |             | NCC1=CC=C(C)C=C1     |            | OC(C1=CC(C(=O)N1)=O        |             | NCC1=CC=C(S1)             |            | OC(C1=CC(C(=O)N1)=O        |             | NCC1=CC=C(C(=O)C)C=C1 |            | CC(C)C(=O)O             |
| 81    | 130324061503260417032804  | 6      |             | NCC1=CC=C(O1)        |            | OC(C1=CSC(C(=O)N1)=O       |             | NCCN(C)C(=O)O             |            | OC(C1=CC=C(C(=O)C)C=C1)=O  |             | NCC1=CC=C(C(=O)C)C=C1 |            | CC(C)C(=O)O             |
| 77    | 130224041501260517102804  | 6      |             | NCC=C                |            | ClC(C)C=C(C(=O)O)=CC=C1    |             | NCC(C)C(=O)O              |            | OC(C1=CC=C(C(=O)C)C=C1)=O  |             | NCC1=CC=C(C(=O)C)C=C1 |            | O=C(O)C1=C(C)OC=C1      |
| 79    | 130224081503260417102804  | 6      |             | N1CCNCCC1            |            | ClC(C)C=C(C(=O)O)=CC=C1    |             | NCCN(C)C(=O)O             |            | OC(C1=CC=C(C(=O)C)C=C1)=O  |             | NCC1=CC=C(C(=O)C)C=C1 |            | O=C(O)C1=C(C)OC=C1      |
| 76    | 130124071504260217102804  | 6      |             | NCC1=CC=C(C)C=C1     |            | OC(C1=CC(C(=O)N1)=O        |             | NCC1=CC=C(S(=O)(=O)C)C=C1 |            | OC(C1=CC(C(=O)N1)=O        |             | NCC1=CC=C(C(=O)C)C=C1 |            | O=C(O)C1=C(C)OC=C1      |
| 82    | 130324081506260217102804  | 6      |             | N1CCNCCC1            |            | OC(C1=CSC(C(=O)N1)=O       |             | NCC1=CC=C(C(F)F)C=C1      |            | ClC(C)C=C([C@H](C)C)C(=O)O |             | NCC1=CC=C(C(=O)C)C=C1 |            | O=C(O)C1=C(C)OC=C1      |
| 88    | 130924021503261017102804  | 6      |             | NCC1CCOCC1           |            | OC(C1=CSC(C(=O)N1)=O       |             | NCC1=CC=C(C)C=C1          |            | ClC(C)C=C([C@H](C)C)C(=O)O |             | NCC1=CC=C(C(=O)C)C=C1 |            | O=C(O)C1=C(C)OC=C1      |
| 83    | 130424031502260217032803  | 6      |             | NCCCO                |            | ClC(C)C=C([C@H](C)C)C(=O)O |             | NCC1=CC=C(S(=O)(=O)C)C=C1 |            | OC(C1=CC(C(=O)N1)=O        |             | NCCCN1C=CN=C1         |            | OC([C@H](C)C)C(=O)S     |
| 78    | 130224081502260717032803  | 6      |             | N1CCNCCC1            |            | ClC(C)C=C(C(=O)O)=CC=C1    |             | NCC1=CC=C(N(C)C)C=C1      |            | OC(C1=CSC(C(=O)N1)=O       |             | NCCCN1C=CN=C1         |            | OC([C@H](C)C)C(=O)S     |
| 87    | 130924021501260317032803  | 6      |             | NCC1CCOCC1           |            | ClC(C)C=C(C(=O)O)=CC=C1    |             | NCC1=CC=C(S1)             |            | OC(C1=CC(C(=O)N1)=O        |             | NCCCN1C=CN=C1         |            | OC([C@H](C)C)C(=O)S     |
| 73    | 130124041501261017032803  | 6      |             | NCC=C                |            | OC(C1=CC(C(=O)N1)=O        |             | NCC1=CC=C(C)C=C1          |            | ClC(C)C=C([C@H](C)C)C(=O)O |             | NCCCN1C=CN=C1         |            | ClC(C)C=C(C(=O)O)=CC=C1 |
| 72    | 130124031502261017032803  | 6      |             | NCCCO                |            | OC(C1=CC(C(=O)N1)=O        |             | NCC1=CC=C(C)C=C1          |            | ClC(C)C=C([C@H](C)C)C(=O)O |             | NCCCN1C=CN=C1         |            | OC([C@H](C)C)C(=O)S     |
| 74    | 13012405150260317032803   | 6      |             | NCC1=CC=C(C(=O)C2=C1 |            | OC(C1=CC(C(=O)N1)=O        |             | CC(C)CN                   |            | ClC(C)C=C([C@H](C)C)C(=O)O |             | NCCCN1C=CN=C1         |            | OC([C@H](C)C)C(=O)S     |
| 80    | 130324041502260417042803  | 6      |             | NCC=C                |            | OC(C1=CSC(C(=O)N1)=O       |             | NCCN(C)C(=O)O             |            | OC(C1=CC=C(C(=O)C)C=C1)=O  |             | NCCCN1C=CN=C1         |            | OC([C@H](C)C)C(=O)S     |
| 89    | 130924031503261017032803  | 6      |             | NCC1CCOCC1           |            | OC(C1=CSC(C(=O)N1)=O       |             | NCC1=CC=C(C)C=C1          |            | ClC(C)C=C([C@H](C)C)C(=O)O |             | NCCCN1C=CN=C1         |            | OC([C@H](C)C)C(=O)S     |
| 90    | 131024011504260917042809  | 6      |             | NCC1=C(F)C(F)C=C1    |            | OC(C1=CC(C(=O)N1)=O        |             | NCC1=CC=C(C)C=C1          |            | OC(C1=CC=C(C(=O)C)C=C1)=O  |             | NCC1CCOCC1            |            | OC([C@H](C)C)C(=O)S     |
| 86    | 1304241501509260217022804 | 6      |             | C1CNCCN1             |            | ClC(C)C=C([C@H](C)C)C(=O)O |             | NCC1=CC=C(C(F)F)C=C1      |            | ClC(C)C=C([C@H](C)C)C(=O)O |             | NCC1=CC=C(O1)         |            | ClC(C)C=C(C(=O)O)=CC=C1 |
| 91    | 131024031504260517032602  | 6      |             | NCC1=C(F)C(F)C=C1    |            | OC(C1=CSC(C(=O)N1)=O       |             | NCC(C)C(=O)O              |            | OC(C1=CC=C(C(=O)C)C=C1)=O  |             | NCCO                  |            | OC([C@H](C)C)C(=O)S     |
| 125   | 130424031502260417022805  | 5      |             | NCCCO                |            | ClC(C)C=C([C@H](C)C)C(=O)O |             | NCCN(C)C(=O)O             |            | OC(C1=CC=C(C(=O)C)C=C1)=O  |             | NCC1CCOCC1            |            | ClC(C)C=C(C(=O)O)=CC=C1 |
| 122   | 130324101502260417032801  | 5      |             | C1CNCCN1             |            | OC(C1=CSC(C(=O)N1)=O       |             | NCCN(C)C(=O)O             |            | OC(C1=CC=C(C(=O)C)C=C1)=O  |             | NCC1=CNC2=CC=CC=C21   |            | OC([C@H](C)C)C(=O)S     |
| 113   | 130224101502261017032804  | 5      |             | C1CNCCN1             |            | ClC(C)C=C(C(=O)O)=CC=C1    |             | NCC1=CC=C(C)C=C1          |            | ClC(C)C=C([C@H](C)C)C(=O)O |             | NCC1=CC=C(C(=O)C)C=C1 |            | CC(C)C(=O)O             |
| 126   | 130424031504260417102803  | 5      |             | NCCCO                |            | ClC(C)C=C([C@H](C)C)C(=O)O |             | NCCN(C)C(=O)O             |            | OC(C1=CC=C(C(=O)C)C=C1)=O  |             | NCC1=CC=C(C(=O)C)C=C1 |            | OC([C@H](C)C)C(=O)S     |
| 128   | 130424051504261017102804  | 5      |             | NCC1=CC=C(C(=O)C2=C1 |            | ClC(C)C=C([C@H](C)C)C(=O)O |             | NCC1=CC=C(C)C=C1          |            | ClC(C)C=C([C@H](C)C)C(=O)O |             | NCC1=CC=C(C(=O)C)C=C1 |            | O=C(O)C1=C(C)OC=C1      |
| 110   | 13022408150260317102804   | 5      |             | N1CCNCCC1            |            | ClC(C)C=C(C(=O)O)=CC=C1    |             | CC(C)CN                   |            | ClC(C)C=C([C@H](C)C)C(=O)O |             | NCC1=CC=C(C(=O)C)C=C1 |            | O=C(O)C1=C(C)OC=C1      |
| 111   | 130224091504260017102804  | 5      |             | NCCCN1C=CN=C1        |            | ClC(C)C=C(C(=O)O)=CC=C1    |             | NCC1=CC=C(C)C=C1          |            | OC(C1=CC=C(C(=O)C)C=C1)=O  |             | NCC1=CC=C(C(=O)C)C=C1 |            | O=C(O)C1=C(C)OC=C1      |
| 134   | 131024021501261017102804  | 5      |             | NCC1=CC(F)C(F)C=C1   |            | ClC(C)C=C(C(=O)O)=CC=C1    |             | NCC1=CC=C(C)C=C1          |            | ClC(C)C=C([C@H](C)C)C(=O)O |             | NCC1=CC=C(C(=O)C)C=C1 |            | O=C(O)C1=C(C)OC=C1      |
| 135   | 131024021502260617102804  | 5      |             | NCC1=CC(F)C(F)C=C1   |            | ClC(C)C=C(C(=O)O)=CC=C1    |             | NCC1=CC=C(C)C=C1          |            | OC(C1=CC=C(C(=O)C)C=C1)=O  |             | NCC1=CC=C(C(=O)C)C=C1 |            | O=C(O)C1=C(C)OC=C1      |
| 99    | 130124071504260417102804  | 5      |             | NCC1=CC=C(C)C=C1     |            | OC(C1=CC(C(=O)N1)=O        |             | NCCN(C)C(=O)O             |            | OC(C1=CC=C(C(=O)C)C=C1)=O  |             | NCC1=CC=C(C(=O)C)C=C1 |            | O=C(O)C1=C(C)OC=C1      |
| 131   | 130424101504260317032803  | 5      |             | C1CNCCN1             |            | ClC(C)C=C([C@H](C)C)C(=O)O |             | NCC1=CC=C(S1)             |            | OC(C1=CC(C(=O)N1)=O        |             | NCCCN1C=CN=C1         |            | OC([C@H](C)C)C(=O)S     |



| Entry | Molecular ID             | Copies | Amines (X1) | Amines (X1): smiles   | Acids (X1) | Acids (X1) smiles   | Amines (X2) | Amines (X2) smiles        | Acids (X2) | Acids (X2) smiles   | Amines (X3) | Amines (X3) smiles    | Acids (X3) | Acids (X3) smiles    |
|-------|--------------------------|--------|-------------|-----------------------|------------|---------------------|-------------|---------------------------|------------|---------------------|-------------|-----------------------|------------|----------------------|
| 130   | 130424091502260817032803 | 5      |             | NCCN1C=CN=C1          |            | ClC(C)(C)(Cl)C(O)=O |             | N[C@@H](C)C1=CC=CC=C1     |            | OC(C)=C(C)C(O)=O    |             | NCCN1C=CN=C1          |            | OC(C@H)(C)C(O)=O [S] |
| 112   | 130224101509260417032803 | 5      |             | C1CNCCN1              |            | ClC(C)(C)(O)=O      |             | NCC1=CC=CC=C1             |            | OC(C)=C(C)C(O)=O    |             | NCCN1C=CN=C1          |            | OC(C)=C(C)C(O)=O     |
| 114   | 130224101509260317032803 | 5      |             | C1CNCCN1              |            | ClC(C)(C)(O)=O      |             | NCC1=CC=CC(F)F=C1         |            | OC(C)=C(C)C(O)=O    |             | NCCN1C=CN=C1          |            | OC(C@H)(C)C(O)=O [S] |
| 108   | 130224031502260717032803 | 5      |             | NCCOC                 |            | ClC(C)(C)(O)=O      |             | NCC1=CC=CC(N)C=C1         |            | OC(C)=C(C)C(O)=O    |             | NCCN1C=CN=C1          |            | OC(C)=C(C)C(O)=O     |
| 109   | 130224031502260717032803 | 5      |             | NCCOC                 |            | ClC(C)(C)(O)=O      |             | NCC1=CC=CC(N)C=C1         |            | OC(C)=C(C)C(O)=O    |             | NCCN1C=CN=C1          |            | OC(C@H)(C)C(O)=O [S] |
| 132   | 130924021509260417022803 | 5      |             | NCC1CCOCC1            |            | ClC(C)(C)(O)=O      |             | NCC1=CC=CC(F)F=C1         |            | ClC(C)(C)(Cl)C(O)=O |             | NCCN1C=CN=C1          |            | ClC(C)(C)(O)=O=CC=C1 |
| 106   | 130124101502260417022803 | 5      |             | C1CNCCN1              |            | OC(C)=C(C)C(O)=O    |             | NCCN(C)C=O                |            | OC(C)=C(C)C(O)=O    |             | NCCN1C=CN=C1          |            | OC(C@H)(C)C(O)=O [R] |
| 107   | 130124101503260417022803 | 5      |             | C1CNCCN1              |            | OC(C)=C(C)C(O)=O    |             | NCCN(C)C=O                |            | OC(C)=C(C)C(O)=O    |             | NCCN1C=CN=C1          |            | ClC(C)(C)(O)=O=CC=C1 |
| 95    | 130124071501260417032803 | 5      |             | NCC1=CC=C(C)C=C1      |            | OC(C)=C(C)C(O)=O    |             | NCCN(C)C=O                |            | OC(C)=C(C)C(O)=O    |             | NCCN1C=CN=C1          |            | OC(C@H)(C)C(O)=O [S] |
| 96    | 130124071501260617022803 | 5      |             | NCC1=CC=C(C)C=C1      |            | OC(C)=C(C)C(O)=O    |             | NCC1=CC=CC=C1             |            | ClC(C)(C)(Cl)C(O)=O |             | NCCN1C=CN=C1          |            | ClC(C)(C)(O)=O=CC=C1 |
| 98    | 130124071501261017042803 | 5      |             | NCC1=CC=C(C)C=C1      |            | OC(C)=C(C)C(O)=O    |             | NCC1=CC=C(C)C=C1          |            | ClC(C)(C)(Cl)C(O)=O |             | NCCN1C=CN=C1          |            | OC(C@H)(C)C(O)=O [R] |
| 101   | 130124071509260417022803 | 5      |             | NCC1=CC=C(C)C=C1      |            | OC(C)=C(C)C(O)=O    |             | NCC1=CC=CC(F)F=C1         |            | ClC(C)(C)(Cl)C(O)=O |             | NCCN1C=CN=C1          |            | ClC(C)(C)(O)=O=CC=C1 |
| 103   | 130124091501260617022803 | 5      |             | NCCN1C=CN=C1          |            | OC(C)=C(C)C(O)=O    |             | NCC1=CC=CC=C1             |            | OC(C)=C(C)C(O)=O    |             | NCCN1C=CN=C1          |            | ClC(C)(C)(O)=O=CC=C1 |
| 104   | 130124091501260717032803 | 5      |             | NCCN1C=CN=C1          |            | OC(C)=C(C)C(O)=O    |             | NCC1=CC=CC(N)C=C1         |            | OC(C)=C(C)C(O)=O    |             | NCCN1C=CN=C1          |            | OC(C@H)(C)C(O)=O [S] |
| 92    | 130124051503261017042803 | 5      |             | NCC1=CC=C(C)C(O)C2=C1 |            | OC(C)=C(C)C(O)=O    |             | NCC1=CC=C(C)C=C1          |            | ClC(C)(C)(Cl)C(O)=O |             | NCCN1C=CN=C1          |            | OC(C@H)(C)C(O)=O [R] |
| 93    | 130124061509260117012803 | 6      |             | NCC1=CC=C(C)C(O)C2=C1 |            | OC(C)=C(C)C(O)=O    |             | NCC1=CC=CC(F)F=C1         |            | ClC(C)(C)(Cl)C(O)=O |             | NCCN1C=CN=C1          |            | ClC(C)(C)(O)=O=CC=C1 |
| 94    | 130124051509260417032803 | 5      |             | NCC1=CC=C(C)C(O)C2=C1 |            | OC(C)=C(C)C(O)=O    |             | NCC1=CC=CC(F)F=C1         |            | ClC(C)(C)(Cl)C(O)=O |             | NCCN1C=CN=C1          |            | OC(C@H)(C)C(O)=O [S] |
| 123   | 130324101503260417022803 | 5      |             | C1CNCCN1              |            | OC(C)=C(C)C(O)=O    |             | NCCN(C)C=O                |            | OC(C)=C(C)C(O)=O    |             | NCCN1C=CN=C1          |            | ClC(C)(C)(O)=O=CC=C1 |
| 115   | 130324031503260417022803 | 5      |             | NCCOC                 |            | OC(C)=C(C)C(O)=O    |             | NCCN(C)C=O                |            | OC(C)=C(C)C(O)=O    |             | NCCN1C=CN=C1          |            | ClC(C)(C)(O)=O=CC=C1 |
| 120   | 130324071503261017022803 | 5      |             | NCC1=CC=C(C)C=C1      |            | OC(C)=C(C)C(O)=O    |             | NCC1=CC=C(C)C=C1          |            | ClC(C)(C)(Cl)C(O)=O |             | NCCN1C=CN=C1          |            | ClC(C)(C)(O)=O=CC=C1 |
| 121   | 130324091510260317032803 | 5      |             | NCCN1C=CN=C1          |            | OC(C)=C(C)C(O)=O    |             | CC(C)CN                   |            | ClC(C)(C)(Cl)C(O)=O |             | NCCN1C=CN=C1          |            | OC(C@H)(C)C(O)=O [S] |
| 117   | 130324051502261017042803 | 5      |             | NCC1=CC=C(C)C(O)C2=C1 |            | OC(C)=C(C)C(O)=O    |             | NCC1=CC=C(C)C=C1          |            | ClC(C)(C)(Cl)C(O)=O |             | NCCN1C=CN=C1          |            | OC(C@H)(C)C(O)=O [R] |
| 110   | 130324051504260917012803 | 5      |             | NCC1=CC=C(C)C(O)C2=C1 |            | OC(C)=C(C)C(O)=O    |             | NCC1=CC=CC(F)F=C1         |            | ClC(C)(C)(Cl)C(O)=O |             | NCCN1C=CN=C1          |            | OC(C)=C(C)C(O)=O     |
| 119   | 130324051509260417042803 | 5      |             | NCC1=CC=C(C)C(O)C2=C1 |            | OC(C)=C(C)C(O)=O    |             | NCC1=CC=CC(F)F=C1         |            | ClC(C)(C)(Cl)C(O)=O |             | NCCN1C=CN=C1          |            | OC(C@H)(C)C(O)=O [R] |
| 124   | 130424031502260317032809 | 5      |             | NCCOC                 |            | ClC(C)(C)(Cl)C(O)=O |             | NCC1=CC=CC1               |            | OC(C)=C(C)C(O)=O    |             | NCC1CCOCC1            |            | OC(C@H)(C)C(O)=O [S] |
| 127   | 130424031504260617032809 | 5      |             | NCCOC                 |            | ClC(C)(C)(Cl)C(O)=O |             | NCC1=CC=CC1               |            | OC(C)=C(C)C(O)=O    |             | NCC1CCOCC1            |            | OC(C@H)(C)C(O)=O [S] |
| 102   | 130124081502260417022809 | 5      |             | N1CNCCC1              |            | OC(C)=C(C)C(O)=O    |             | NCCN(C)C=O                |            | OC(C)=C(C)C(O)=O    |             | NCC1CCOCC1            |            | ClC(C)(C)(O)=O=CC=C1 |
| 100   | 130124071509260117022809 | 5      |             | NCC1=CC=C(C)C=C1      |            | OC(C)=C(C)C(O)=O    |             | NCC1=CC=CC(F)F=C1         |            | ClC(C)(C)(Cl)C(O)=O |             | NCC1CCOCC1            |            | ClC(C)(C)(O)=O=CC=C1 |
| 105   | 130124091504260217022809 | 5      |             | NCCN1C=CN=C1          |            | OC(C)=C(C)C(O)=O    |             | NCC1=CC=C(S(=O)(=O)C)C=C1 |            | OC(C)=C(C)C(O)=O    |             | NCC1CCOCC1            |            | ClC(C)(C)(O)=O=CC=C1 |
| 133   | 130924031501260217032809 | 0      |             | NCC1CCOCC1            |            | OC(C)=C(C)C(O)=O    |             | NCC1=CC=C(S(=O)(=O)C)C=C1 |            | OC(C)=C(C)C(O)=O    |             | NCC1CCOCC1            |            | OC(C@H)(C)C(O)=O [S] |
| 97    | 130124071501260817032804 | 5      |             | NCC1=CC=C(C)C=C1      |            | OC(C)=C(C)C(O)=O    |             | N[C@@H](C)C1=CC=CC=C1     |            | OC(C)=C(C)C(O)=O    |             | NCC1=CC=C(C)C=C1      |            | OC(C@H)(C)C(O)=O [S] |
| 116   | 130324041509260317022804 | 5      |             | NCC=C                 |            | OC(C)=C(C)C(O)=O    |             | NCC1=CC=CC(F)F=C1         |            | ClC(C)(C)(Cl)C(O)=O |             | NCC1=CC=C(C)C=C1      |            | ClC(C)(C)(O)=O=CC=C1 |
| 129   | 130424091502260217032802 | 5      |             | NCCN1C=CN=C1          |            | ClC(C)(C)(Cl)C(O)=O |             | NCC1=CC=C(S(=O)(=O)C)C=C1 |            | OC(C)=C(C)C(O)=O    |             | NCCO                  |            | OC(C@H)(C)C(O)=O [S] |
| 181   | 130224101501260417022810 | 4      |             | C1CNCCN1              |            | ClC(C)(C)(O)=O      |             | NCCN(C)C=O                |            | OC(C)=C(C)C(O)=O    |             | NCC1=CC=C(C)C(O)C2=C1 |            | ClC(C)(C)(O)=O=CC=C1 |

| Entry | Molecular ID             | Copies | Amines (X1) | Amines (X1): smiles  | Acids (X1) | Acids (X1) smiles      | Amines (X2) | Amines (X2) smiles      | Acids (X2) | Acids (X2) smiles     | Amines (X3) | Amines (X3) smiles      | Acids (X3) | Acids (X3) smiles        |
|-------|--------------------------|--------|-------------|----------------------|------------|------------------------|-------------|-------------------------|------------|-----------------------|-------------|-------------------------|------------|--------------------------|
| 138   | 130124031509260117032810 | 4      |             | NCCCOCC              |            | OC(C1=CC=C(C(=O)N1)=O  |             | NCC1=CC=CC(C(F)(F)F)=C1 |            | OC(C1=CC=C(C(=O)N1)=O |             | NCC1=CC=C(C(=O)N1)=O    |            | OC(C1=CC=C(C(=O)N1)=O    |
| 161   | 130124081509261017032810 | 4      |             | N1CCNCCC1            |            | OC(C1=CC=C(C(=O)N1)=O  |             | NCC1=CC=CC(C(F)(F)F)=C1 |            | OC(C1=CC=C(C(=O)N1)=O |             | NCC1=CC=C(C(=O)N1)=O    |            | OC(C1=CC=C(C(=O)N1)=O    |
| 204   | 130324101509260217042810 | 4      |             | C1CNCCN1             |            | OC(C1=CC=C(C(=O)N1)=O  |             | NCC1=CC=CC(C(F)(F)F)=C1 |            | OC(C1=CC=C(C(=O)N1)=O |             | NCC1=CC=C(C(=O)N1)=O    |            | OC(C1=CC=C(C(=O)N1)=O    |
| 223   | 131024031501260417032810 | 4      |             | NCC1=CC(F)=C(F)C=C1  |            | OC(C1=CC=C(C(=O)N1)=O  |             | NCCN(C)C=O              |            | OC(C1=CC=C(C(=O)N1)=O |             | NCC1=CC=C(C(=O)N1)=O    |            | OC(C1=CC=C(C(=O)N1)=O    |
| 227   | 131024031504260817032810 | 4      |             | NCC1=CC(F)=C(F)C=C1  |            | OC(C1=CC=C(C(=O)N1)=O  |             | NCC(C)C(O)C1=CC=CC=C1   |            | OC(C1=CC=C(C(=O)N1)=O |             | NCC1=CC=C(C(=O)N1)=O    |            | OC(C1=CC=C(C(=O)N1)=O    |
| 207   | 13042401502260517032805  | 4      |             | NCC=C                |            | ClC(C1=CC=C(C(=O)N1)=O |             | NCC(C)C(O)C1=CC=CC=C1   |            | OC(C1=CC=C(C(=O)N1)=O |             | NCC1COC(C1=CC=C2)C=C2O1 |            | OC(C1=CC=C(C(=O)N1)=O    |
| 206   | 130424031504260817032805 | 4      |             | NCCCOCC              |            | ClC(C1=CC=C(C(=O)N1)=O |             | NCC1=CC=CC=C1           |            | OC(C1=CC=C(C(=O)N1)=O |             | NCC1COC(C1=CC=C2)C=C2O1 |            | OC(C1=CC=C(C(=O)N1)=O    |
| 211   | 130424051509260217032805 | 4      |             | NCC1=CC=C(C(=O)N1)=O |            | ClC(C1=CC=C(C(=O)N1)=O |             | NCC1=CC=CC(C(F)(F)F)=C1 |            | OC(C1=CC=C(C(=O)N1)=O |             | NCC1COC(C1=CC=C2)C=C2O1 |            | OC(C1=CC=C(C(=O)N1)=O    |
| 187   | 130224101504260817032805 | 4      |             | C1CNCCN1             |            | ClC(C1=CC=C(C(=O)N1)=O |             | NCC1=CC=CC(C(F)(F)F)=C1 |            | OC(C1=CC=C(C(=O)N1)=O |             | NCC1COC(C1=CC=C2)C=C2O1 |            | OC(C1=CC=C(C(=O)N1)=O    |
| 188   | 130224101509260117032801 | 4      |             | C1CNCCN1             |            | ClC(C1=CC=C(C(=O)N1)=O |             | NCC1=CC=CC(C(F)(F)F)=C1 |            | OC(C1=CC=C(C(=O)N1)=O |             | NCC1=CC=C(C(=O)N1)=O    |            | OC(C1=CC=C(C(=O)N1)=O    |
| 170   | 13022401501260217032801  | 4      |             | NCC1=CC=C(C(=O)N1)=O |            | ClC(C1=CC=C(C(=O)N1)=O |             | NCC1=CC=CC(C(F)(F)F)=C1 |            | OC(C1=CC=C(C(=O)N1)=O |             | NCC1=CC=C(C(=O)N1)=O    |            | OC(C1=CC=C(C(=O)N1)=O    |
| 142   | 130124051501260417032801 | 4      |             | NCC1=CC=C(C(=O)N1)=O |            | OC(C1=CC=C(C(=O)N1)=O  |             | NCCN(C)C=O              |            | OC(C1=CC=C(C(=O)N1)=O |             | NCC1=CC=C(C(=O)N1)=O    |            | OC(C1=CC=C(C(=O)N1)=O    |
| 221   | 13042410150226017022807  | 4      |             | C1CNCCN1             |            | ClC(C1=CC=C(C(=O)N1)=O |             | NCC1=CC=C(C(=O)N1)=O    |            | OC(C1=CC=C(C(=O)N1)=O |             | NCC1=CC=C(C(=O)N1)=O    |            | OC(C1=CC=C(C(=O)N1)=O    |
| 209   | 130424051501260517032804 | 4      |             | NCC1=CC=C(C(=O)N1)=O |            | ClC(C1=CC=C(C(=O)N1)=O |             | NCC(C)C(O)C1=CC=CC=C1   |            | OC(C1=CC=C(C(=O)N1)=O |             | NCC(C)C(O)C1=CC=CC=C1   |            | CC(C)O=O                 |
| 182   | 130224101501260717032804 | 4      |             | C1CNCCN1             |            | ClC(C1=CC=C(C(=O)N1)=O |             | NCC1=CC=C(C(=O)N1)=O    |            | OC(C1=CC=C(C(=O)N1)=O |             | NCC(C)C(O)C1=CC=CC=C1   |            | CC(C)O=O                 |
| 183   | 13022410160260417032802  | 4      |             | C1CNCCN1             |            | ClC(C1=CC=C(C(=O)N1)=O |             | NCCN(C)C=O              |            | OC(C1=CC=C(C(=O)N1)=O |             | NCC(C)C(O)C1=CC=CC=C1   |            | ClC(C1=CC=C(C(=O)N1)=O   |
| 177   | 130224081504260417032804 | 4      |             | NCC1=CC=C(C(=O)N1)=O |            | ClC(C1=CC=C(C(=O)N1)=O |             | NCCN(C)C=O              |            | OC(C1=CC=C(C(=O)N1)=O |             | NCC(C)C(O)C1=CC=CC=C1   |            | CC(C)O=O                 |
| 222   | 131024021502260417032804 | 4      |             | NCC1=CC(F)=C(F)C=C1  |            | ClC(C1=CC=C(C(=O)N1)=O |             | NCCN(C)C=O              |            | OC(C1=CC=C(C(=O)N1)=O |             | NCC(C)C(O)C1=CC=CC=C1   |            | CC(C)O=O                 |
| 164   | 130124091503260617032804 | 4      |             | NCC1=CC=C(C(=O)N1)=O |            | OC(C1=CC=C(C(=O)N1)=O  |             | NCC1=CC=CC=C1           |            | OC(C1=CC=C(C(=O)N1)=O |             | NCC(C)C(O)C1=CC=CC=C1   |            | CC(C)O=O                 |
| 200   | 130324081509260117032804 | 4      |             | N1CCNCCC1            |            | OC(C1=CC=C(C(=O)N1)=O  |             | NCC1=CC=CC(C(F)(F)F)=C1 |            | OC(C1=CC=C(C(=O)N1)=O |             | NCC(C)C(O)C1=CC=CC=C1   |            | CC(C)O=O                 |
| 208   | 130424041503260717102804 | 4      |             | NCC=C                |            | ClC(C1=CC=C(C(=O)N1)=O |             | NCC1=CC=C(C(=O)N1)=O    |            | OC(C1=CC=C(C(=O)N1)=O |             | NCC(C)C(O)C1=CC=CC=C1   |            | O=C(O)C1=CC=C(C(=O)N1)=O |
| 216   | 130424081504260517102804 | 4      |             | NCC1=CC=C(C(=O)N1)=O |            | ClC(C1=CC=C(C(=O)N1)=O |             | NCC(C)C(O)C1=CC=CC=C1   |            | OC(C1=CC=C(C(=O)N1)=O |             | NCC(C)C(O)C1=CC=CC=C1   |            | O=C(O)C1=CC=C(C(=O)N1)=O |
| 164   | 130224101502260517102804 | 4      |             | C1CNCCN1             |            | ClC(C1=CC=C(C(=O)N1)=O |             | NCC(C)C(O)C1=CC=CC=C1   |            | OC(C1=CC=C(C(=O)N1)=O |             | NCC(C)C(O)C1=CC=CC=C1   |            | O=C(O)C1=CC=C(C(=O)N1)=O |
| 185   | 130224101503260517102804 | 4      |             | C1CNCCN1             |            | ClC(C1=CC=C(C(=O)N1)=O |             | NCC(C)C(O)C1=CC=CC=C1   |            | OC(C1=CC=C(C(=O)N1)=O |             | NCC(C)C(O)C1=CC=CC=C1   |            | O=C(O)C1=CC=C(C(=O)N1)=O |
| 186   | 130224101503261017102804 | 4      |             | C1CNCCN1             |            | ClC(C1=CC=C(C(=O)N1)=O |             | NCC1=CC=C(C(=O)N1)=O    |            | OC(C1=CC=C(C(=O)N1)=O |             | NCC(C)C(O)C1=CC=CC=C1   |            | O=C(O)C1=CC=C(C(=O)N1)=O |
| 176   | 130224081510260417102804 | 4      |             | N1CCNCCC1            |            | ClC(C1=CC=C(C(=O)N1)=O |             | NCC(C)C(O)C1=CC=CC=C1   |            | OC(C1=CC=C(C(=O)N1)=O |             | NCC(C)C(O)C1=CC=CC=C1   |            | O=C(O)C1=CC=C(C(=O)N1)=O |
| 174   | 130224071509260417102803 | 4      |             | NCC1=CC=C(C(=O)N1)=O |            | ClC(C1=CC=C(C(=O)N1)=O |             | NCC1=CC=CC(C(F)(F)F)=C1 |            | OC(C1=CC=C(C(=O)N1)=O |             | NCC(C)C(O)C1=CC=CC=C1   |            | OC(C1=CC=C(C(=O)N1)=O    |
| 169   | 130224051501260417102801 | 4      |             | NCC1=CC=C(C(=O)N1)=O |            | ClC(C1=CC=C(C(=O)N1)=O |             | NCCN(C)C=O              |            | OC(C1=CC=C(C(=O)N1)=O |             | NCC(C)C(O)C1=CC=CC=C1   |            | OC(C1=CC=C(C(=O)N1)=O    |
| 162   | 130124081509260117102804 | 4      |             | N1CCNCCC1            |            | OC(C1=CC=C(C(=O)N1)=O  |             | NCC1=CC=CC(C(F)(F)F)=C1 |            | OC(C1=CC=C(C(=O)N1)=O |             | NCC(C)C(O)C1=CC=CC=C1   |            | O=C(O)C1=CC=C(C(=O)N1)=O |
| 130   | 130124021509260317102804 | 4      |             | NCC1=CC=C(C(=O)N1)=O |            | OC(C1=CC=C(C(=O)N1)=O  |             | NCC1=CC=CC(C(F)(F)F)=C1 |            | OC(C1=CC=C(C(=O)N1)=O |             | NCC(C)C(O)C1=CC=CC=C1   |            | O=C(O)C1=CC=C(C(=O)N1)=O |
| 159   | 130124071509260417102804 | 4      |             | NCC1=CC=C(C(=O)N1)=O |            | OC(C1=CC=C(C(=O)N1)=O  |             | NCC1=CC=CC(C(F)(F)F)=C1 |            | OC(C1=CC=C(C(=O)N1)=O |             | NCC(C)C(O)C1=CC=CC=C1   |            | O=C(O)C1=CC=C(C(=O)N1)=O |
| 145   | 130124051502260517102804 | 4      |             | NCC1=CC=C(C(=O)N1)=O |            | OC(C1=CC=C(C(=O)N1)=O  |             | NCC(C)C(O)C1=CC=CC=C1   |            | OC(C1=CC=C(C(=O)N1)=O |             | NCC(C)C(O)C1=CC=CC=C1   |            | O=C(O)C1=CC=C(C(=O)N1)=O |
| 202   | 130324101502260417102804 | 4      |             | C1CNCCN1             |            | OC(C1=CC=C(C(=O)N1)=O  |             | NCCN(C)C=O              |            | OC(C1=CC=C(C(=O)N1)=O |             | NCC(C)C(O)C1=CC=CC=C1   |            | O=C(O)C1=CC=C(C(=O)N1)=O |
| 191   | 130324031501260417102803 | 4      |             | NCCCOCC              |            | OC(C1=CC=C(C(=O)N1)=O  |             | NCCN(C)C=O              |            | OC(C1=CC=C(C(=O)N1)=O |             | NCC(C)C(O)C1=CC=CC=C1   |            | OC(C1=CC=C(C(=O)N1)=O    |

| Entry | Molecular ID             | Copies | Amines (X1) | Amines (X1): smiles | Acids (X1) | Acids (X1) smiles        | Amines (X2) | Amines (X2) smiles        | Acids (X2) | Acids (X2) smiles        | Amines (X3) | Amines (X3) smiles    | Acids (X3) | Acids (X3) smiles      |
|-------|--------------------------|--------|-------------|---------------------|------------|--------------------------|-------------|---------------------------|------------|--------------------------|-------------|-----------------------|------------|------------------------|
| 224   | 131024031503260317032806 | 4      |             | NCC1=CC(F)=C(F)C=C1 |            | OC(C1=CSC(C)C)N1=O       |             | NCC1=CC=C(S1)             |            | OC(C1=CC(C)C)N1=O        |             | NC[C@H](C)C1=CC=CC=C1 |            | OC(C[C@H](C)C)N1=O [S] |
| 166   | 130324051501260417032806 | 4      |             | NCC1=CC=C(C)C=C1    |            | OC(C1=CSC(C)C)N1=O       |             | NCCNC(C)=O                |            | OC(C1=CC(C)C)C=C1=O      |             | NC[C@H](C)C1=CC=CC=C1 |            | OC(C[C@H](C)C)N1=O [S] |
| 219   | 130424101502260217032803 | 4      |             | C1CNCCN1            |            | ClC(C)C=C(C[C@H](C)C)O=O |             | NCC1=CC=C(S(=O)(=O)C)C=C1 |            | OC(C1=CC(C)C)N1=O        |             | NCCCN1C=CN=C1         |            | ClC(C1=CC(C)O)C=C1     |
| 214   | 130424091501260317032803 | 4      |             | NCCCN1C=CN=C1       |            | ClC(C)C=C(C[C@H](C)C)O=O |             | NCC1=CC=C(S1)             |            | OC(C1=CC(C)C)N1=O        |             | NCCCN1C=CN=C1         |            | OC(C[C@H](C)C)N1=O [S] |
| 215   | 130424091501260417032803 | 4      |             | NCCCN1C=CN=C1       |            | ClC(C)C=C(C[C@H](C)C)O=O |             | NCCNC(C)=O                |            | OC(C1=CC(C)C)C=C1=O      |             | NCCCN1C=CN=C1         |            | OC(C[C@H](C)C)N1=O [S] |
| 217   | 130424091504261017022803 | 4      |             | NCCCN1C=CN=C1       |            | ClC(C)C=C(C[C@H](C)C)O=O |             | NCC1=CC=C(C)C=C1          |            | OC(C)C=C(C[C@H](C)C)O=O  |             | NCCCN1C=CN=C1         |            | ClC(C1=CC(C)O)C=C1     |
| 218   | 130424091509260217022803 | 4      |             | NCCCN1C=CN=C1       |            | ClC(C)C=C(C[C@H](C)C)O=O |             | NCC1=CC=CC(C(F)(F)F)C=C1  |            | OC(C)C=C(C[C@H](C)C)O=O  |             | NCCCN1C=CN=C1         |            | ClC(C1=CC(C)O)C=C1     |
| 189   | 130224101510260417022803 | 4      |             | C1CNCCN1            |            | ClC(C)C(C)O=O=CC=C1      |             | CC(C)CCN                  |            | ClC(C)C=C(C[C@H](C)C)O=O |             | NCCCN1C=CN=C1         |            | ClC(C1=CC(C)O)C=C1     |
| 190   | 130224101510260417022803 | 4      |             | C1CNCCN1            |            | ClC(C)C(C)O=O=CC=C1      |             | CC(C)CCN                  |            | ClC(C)C=C(C[C@H](C)C)O=O |             | NCCCN1C=CN=C1         |            | OC(C[C@H](C)C)N1=O [S] |
| 167   | 130224031504260617032803 | 4      |             | NCCOC               |            | ClC(C)C(C)O=O=CC=C1      |             | NCC1=CC=CC=C1             |            | OC(C1=CC(C)C)C=C1=O      |             | NCCCN1C=CN=C1         |            | OC(C[C@H](C)C)N1=O [S] |
| 175   | 130224081504260317032803 | 4      |             | N1CCNCC1            |            | ClC(C)C(C)O=O=CC=C1      |             | NCC1=CC=C(S1)             |            | OC(C1=CC(C)C)N1=O        |             | NCCCN1C=CN=C1         |            | OC(C[C@H](C)C)N1=O [S] |
| 171   | 130224071501260817042803 | 4      |             | NCC1=CC=C(C)C=C1    |            | ClC(C)C(C)O=O=CC=C1      |             | NCC1=CC=CC=C1             |            | OC(C1=CC(C)C)C=C1=O      |             | NCCCN1C=CN=C1         |            | OC(C[C@H](C)C)N1=O [R] |
| 172   | 130224071502260317042803 | 4      |             | NCC1=CC=C(C)C=C1    |            | ClC(C)C(C)O=O=CC=C1      |             | NCC1=CC=C(S1)             |            | OC(C1=CC(C)C)N1=O        |             | NCCCN1C=CN=C1         |            | OC(C[C@H](C)C)N1=O [R] |
| 178   | 130224091504260817012803 | 4      |             | NCCCN1C=CN=C1       |            | ClC(C)C(C)O=O=CC=C1      |             | NC[C@H](C)C1=CC=CC=C1     |            | OC(C1=CSC(C)C)N1=O       |             | NCCCN1C=CN=C1         |            | OC(C1=CSC(C)N1)O       |
| 180   | 130224081510260317022803 | 4      |             | NCCCN1C=CN=C1       |            | ClC(C)C(C)O=O=CC=C1      |             | CC(C)CCN                  |            | ClC(C)C=C(C[C@H](C)C)O=O |             | NCCCN1C=CN=C1         |            | ClC(C1=CC(C)O)C=C1     |
| 168   | 130224061601260217022803 | 4      |             | NCC1=CC=C(C)C=C1    |            | ClC(C)C(C)O=O=CC=C1      |             | NCC1=CC=C(S(=O)(=O)C)C=C1 |            | OC(C1=CC(C)C)N1=O        |             | NCCCN1C=CN=C1         |            | ClC(C1=CC(C)O)C=C1     |
| 139   | 130124041502260417032803 | 4      |             | NCC=C               |            | OC(C1=CC(C)C)N1=O        |             | NCCNC(C)=O                |            | OC(C1=CC(C)C)C=C1=O      |             | NCCCN1C=CN=C1         |            | OC(C[C@H](C)C)N1=O [S] |
| 141   | 130124041510260217032803 | 4      |             | NCC=C               |            | OC(C1=CC(C)C)N1=O        |             | CC(C)CCN                  |            | ClC(C)C=C(C[C@H](C)C)O=O |             | NCCCN1C=CN=C1         |            | OC(C[C@H](C)C)N1=O [S] |
| 160   | 130124081502260217012803 | 4      |             | N1CCNCC1            |            | OC(C1=CC(C)C)N1=O        |             | NCC1=CC=C(S(=O)(=O)C)C=C1 |            | OC(C1=CC(C)C)N1=O        |             | NCCCN1C=CN=C1         |            | OC(C1=CSC(C)N1)O       |
| 152   | 130124071501260817042803 | 4      |             | NCC1=CC=C(C)C=C1    |            | OC(C1=CC(C)C)N1=O        |             | NC[C@H](C)C1=CC=CC=C1     |            | OC(C1=CSC(C)C)N1=O       |             | NCCCN1C=CN=C1         |            | OC(C[C@H](C)C)N1=O [R] |
| 154   | 130124071502260317032803 | 4      |             | NCC1=CC=C(C)C=C1    |            | OC(C1=CC(C)C)N1=O        |             | NCC1=CC=C(S1)             |            | OC(C1=CC(C)C)N1=O        |             | NCCCN1C=CN=C1         |            | OC(C[C@H](C)C)N1=O [S] |
| 155   | 130124071503260317032803 | 4      |             | NCC1=CC=C(C)C=C1    |            | OC(C1=CC(C)C)N1=O        |             | NCC1=CC=C(S1)             |            | OC(C1=CC(C)C)N1=O        |             | NCCCN1C=CN=C1         |            | OC(C[C@H](C)C)N1=O [S] |
| 156   | 130124071503260717012803 | 4      |             | NCC1=CC=C(C)C=C1    |            | OC(C1=CC(C)C)N1=O        |             | NCC1=CC=C(N(C)C)C=C1      |            | OC(C1=CC(C)C)N1=O        |             | NCCCN1C=CN=C1         |            | OC(C1=CC(C)C)N1=O      |
| 157   | 130124071504260917022803 | 4      |             | NCC1=CC=C(C)C=C1    |            | OC(C1=CC(C)C)N1=O        |             | NCC1=CC(F)C(C(F)(F)F)C=C1 |            | OC(C1=CSC(C)C)N1=O       |             | NCCCN1C=CN=C1         |            | ClC(C1=CC(C)O)C=C1     |
| 158   | 130124071504260917042803 | 4      |             | NCC1=CC=C(C)C=C1    |            | OC(C1=CC(C)C)N1=O        |             | NCC1=CC(F)C(C(F)(F)F)C=C1 |            | OC(C1=CSC(C)C)N1=O       |             | NCCCN1C=CN=C1         |            | OC(C[C@H](C)C)N1=O [R] |
| 144   | 130124051502260417032803 | 4      |             | NCC1=CC=C(C)C=C1    |            | OC(C1=CC(C)C)N1=O        |             | NCCNC(C)=O                |            | OC(C1=CC(C)C)C=C1=O      |             | NCCCN1C=CN=C1         |            | OC(C[C@H](C)C)N1=O [S] |
| 148   | 130124051504260317042803 | 4      |             | NCC1=CC=C(C)C=C1    |            | OC(C1=CC(C)C)N1=O        |             | NCC1=CC=C(S1)             |            | OC(C1=CC(C)C)N1=O        |             | NCCCN1C=CN=C1         |            | OC(C[C@H](C)C)N1=O [R] |
| 151   | 130124051509260217022803 | 4      |             | NCC1=CC=C(C)C=C1    |            | OC(C1=CC(C)C)N1=O        |             | NCC1=CC=CC(C(F)(F)F)C=C1  |            | ClC(C)C=C(C[C@H](C)C)O=O |             | NCCCN1C=CN=C1         |            | ClC(C1=CC(C)O)C=C1     |
| 194   | 130324041502260217032803 | 4      |             | NCC=C               |            | OC(C1=CSC(C)C)N1=O       |             | NCC1=CC=C(S(=O)(=O)C)C=C1 |            | OC(C1=CC(C)C)N1=O        |             | NCCCN1C=CN=C1         |            | OC(C[C@H](C)C)N1=O [S] |
| 203   | 130324101504261017032803 | 4      |             | C1CNCCN1            |            | OC(C1=CSC(C)C)N1=O       |             | NCC1=CC=C(C)C=C1          |            | ClC(C)C=C(C[C@H](C)C)O=O |             | NCCCN1C=CN=C1         |            | OC(C[C@H](C)C)N1=O [S] |
| 192   | 130324031501260717032803 | 4      |             | NCCOC               |            | OC(C1=CSC(C)C)N1=O       |             | NCC1=CC=C(N(C)C)C=C1      |            | OC(C1=CSC(C)C)N1=O       |             | NCCCN1C=CN=C1         |            | OC(C[C@H](C)C)N1=O [S] |
| 193   | 130324031509260417032803 | 4      |             | NCCOC               |            | OC(C1=CSC(C)C)N1=O       |             | NCC1=CC=CC(C(F)(F)F)C=C1  |            | ClC(C)C=C(C[C@H](C)C)O=O |             | NCCCN1C=CN=C1         |            | OC(C[C@H](C)C)N1=O [S] |
| 199   | 130324081502260617022803 | 4      |             | N1CCNCC1            |            | OC(C1=CSC(C)C)N1=O       |             | NCC1=CC=CC=C1             |            | OC(C1=CC(C)C)C=C1=O      |             | NCCCN1C=CN=C1         |            | ClC(C1=CC(C)O)C=C1     |
| 201   | 130324091504260217032803 | 4      |             | NCCCN1C=CN=C1       |            | OC(C1=CSC(C)C)N1=O       |             | NCC1=CC=C(S(=O)(=O)C)C=C1 |            | OC(C1=CC(C)C)N1=O        |             | NCCCN1C=CN=C1         |            | OC(C[C@H](C)C)N1=O [S] |

| Entry | Molecular ID             | Copies | Amines (X1) | Amines (X1)- smiles | Acids (X1) | Acids (X1) smiles          | Amines (X2) | Amines (X2) smiles   | Acids (X2) | Acids (X2) smiles          | Amines (X3) | Amines (X3) smiles    | Acids (X3) | Acids (X3) smiles       |
|-------|--------------------------|--------|-------------|---------------------|------------|----------------------------|-------------|----------------------|------------|----------------------------|-------------|-----------------------|------------|-------------------------|
| 226   | 131024031503260417042803 | 4      |             | NCC1=CC(F)=C(F)C=C1 |            | OC(C1=CSC(C)C)N1=O         |             | NCCNC(C)=O           |            | OC(C1=CC=C(C)C)C=C1=O      |             | NCCCN1C=CN=C1         |            | OC([C@H](C)C)B=O [R]    |
| 196   | 130324051509260117032803 | 4      |             | NCC1=CC=C(C)C=C1    |            | OC(C1=CSC(C)C)N1=O         |             | NCC1=CC=C(C(F)F)F=C1 |            | OC(C1=CC=C(C)C)C=C1=O      |             | NCCCN1C=CN=C1         |            | OC([C@H](C)C)B=O [S]    |
| 209   | 130424031502260617012809 | 4      |             | NCCOC               |            | ClC(C)C=C([C@H](C)C)C(O)=O |             | NCC1=CC=CC=C1        |            | OC(C1=CC=C(C)C)C=C1=O      |             | NCC1CCOC=C1           |            | OC(C1=CSC(C)C)N1=O      |
| 212   | 130424071501260617022809 | 4      |             | NCC1=CC=C(C)C=C1    |            | ClC(C)C=C([C@H](C)C)C(O)=O |             | NCC1=CC=CC=C1        |            | OC(C1=CC=C(C)C)C=C1=O      |             | NCC1CCOC=C1           |            | ClC(C1=CC(C)C)O=C=C1    |
| 166   | 130224031502260717012809 | 4      |             | NCCOC               |            | ClC(C)C=C(O)=CC=C1         |             | NCC1=CC=C(C)C=C1     |            | OC(C1=CSC(C)C)N1=O         |             | NCC1CCOC=C1           |            | OC(C1=CSC(C)C)N1=O      |
| 173   | 130224071503260317032809 | 4      |             | NCC1=CC=C(C)C=C1    |            | ClC(C)C=C(O)=CC=C1         |             | NCC1=CC=CC=C1        |            | OC(C1=CC=C(C)C)N1=O        |             | NCC1CCOC=C1           |            | OC([C@H](C)C)C(O)=O [S] |
| 146   | 130124051502260817042809 | 4      |             | NCC1=CC=C(C)C=C1    |            | OC(C1=CSC(C)C)N1=O         |             | NCC1=CC=C(C)C=C1     |            | OC(C1=CSC(C)C)N1=O         |             | NCC1CCOC=C1           |            | OC([C@H](C)C)B=O [R]    |
| 197   | 130324051510260417032809 | 4      |             | NCC1=CC=C(C)C=C1    |            | OC(C1=CSC(C)C)N1=O         |             | CC(C)CN              |            | ClC(C)C=C([C@H](C)C)C(O)=O |             | NCC1CCOC=C1           |            | OC([C@H](C)C)C(O)=O [S] |
| 220   | 130424101502260817022804 | 4      |             | C1CNCCN1            |            | ClC(C)C=C([C@H](C)C)C(O)=O |             | NCC1=CC=C(C)C=C1     |            | OC(C1=CSC(C)C)N1=O         |             | NCC1=CC=C1            |            | ClC(C1=CC(C)C)O=C=C1    |
| 165   | 130224031501260417032804 | 4      |             | NCCOC               |            | ClC(C)C=C(C)C(O)=CC=C1     |             | NCCNC(C)=O           |            | OC(C1=CC=C(C)C)C=C1=O      |             | NCC1=CC=C1            |            | OC([C@H](C)C)C(O)=O [S] |
| 179   | 130224091509260317032804 | 4      |             | NCCCN1C=CN=C1       |            | ClC(C)C=C(O)=CC=C1         |             | NCC1=CC=C(C(F)F)F=C1 |            | ClC(C)C=C([C@H](C)C)C(O)=O |             | NCC1=CC=C1            |            | OC([C@H](C)C)C(O)=O [S] |
| 153   | 130124071501261017032804 | 4      |             | NCC1=CC=C(C)C=C1    |            | OC(C1=CSC(C)C)N1=O         |             | NCC1=CC=C(C)C=C1     |            | ClC(C)C=C([C@H](C)C)C(O)=O |             | NCC1=CC=C1            |            | OC([C@H](C)C)C(O)=O [S] |
| 163   | 130124091502260617032804 | 4      |             | NCCCN1C=CN=C1       |            | OC(C1=CSC(C)C)N1=O         |             | NCC1=CC=C(C)C=C1     |            | OC(C1=CC=C(C)C)C=C1=O      |             | NCC1=CC=C1            |            | OC([C@H](C)C)C(O)=O [S] |
| 143   | 130124051501260817032804 | 4      |             | NCC1=CC=C(C)C=C1    |            | OC(C1=CSC(C)C)N1=O         |             | NCC1=CC=C(C)C=C1     |            | OC(C1=CSC(C)C)N1=O         |             | NCC1=CC=C1            |            | OC([C@H](C)C)C(O)=O [S] |
| 150   | 130124051504260817032804 | 4      |             | NCC1=CC=C(C)C=C1    |            | OC(C1=CSC(C)C)N1=O         |             | NCC1=CC=C(C)C=C1     |            | OC(C1=CSC(C)C)N1=O         |             | NCC1=CC=C1            |            | OC([C@H](C)C)C(O)=O [S] |
| 226   | 131024031503260417042803 | 4      |             | NCC1=CC(F)=C(F)C=C1 |            | OC(C1=CSC(C)C)N1=O         |             | NCCNC(C)=O           |            | OC(C1=CC=C(C)C)C=C1=O      |             | NCC1=CC=C1            |            | OC([C@H](C)C)C(O)=O [S] |
| 213   | 130424071509260217032802 | 4      |             | NCC1=CC=C(C)C=C1    |            | ClC(C)C=C([C@H](C)C)C(O)=O |             | NCC1=CC=C(C(F)F)F=C1 |            | ClC(C)C=C([C@H](C)C)C(O)=O |             | NCCO                  |            | OC([C@H](C)C)C(O)=O [S] |
| 210   | 130424051504260517032802 | 4      |             | NCC1=CC=C(C)C=C1    |            | ClC(C)C=C([C@H](C)C)C(O)=O |             | NCC(C)C(O)C          |            | OC(C1=CC=C(C)C)C=C1=O      |             | NCCO                  |            | OC([C@H](C)C)C(O)=O [S] |
| 140   | 130124041504260517032802 | 4      |             | NCC=C               |            | OC(C1=CSC(C)C)N1=O         |             | NCC(C)C(O)C          |            | OC(C1=CC=C(C)C)C=C1=O      |             | NCCO                  |            | OC([C@H](C)C)C(O)=O [S] |
| 137   | 130124031504260517032802 | 4      |             | NCCOC               |            | OC(C1=CSC(C)C)N1=O         |             | NCC(C)C(O)C          |            | OC(C1=CC=C(C)C)C=C1=O      |             | NCCO                  |            | OC([C@H](C)C)C(O)=O [S] |
| 147   | 130124051503260817022802 | 4      |             | NCC1=CC=C(C)C=C1    |            | OC(C1=CSC(C)C)N1=O         |             | NCC1=CC=C(C)C=C1     |            | OC(C1=CSC(C)C)N1=O         |             | NCCO                  |            | ClC(C1=CC(C)C)O=C=C1    |
| 149   | 130124051504260517032802 | 4      |             | NCC1=CC=C(C)C=C1    |            | OC(C1=CSC(C)C)N1=O         |             | NCC(C)C(O)C          |            | OC(C1=CC=C(C)C)C=C1=O      |             | NCCO                  |            | OC([C@H](C)C)C(O)=O [S] |
| 190   | 130924071504260517032602 | 4      |             | NCC1=CC=C(C)C=C1    |            | OC(C1=CSC(C)C)N1=O         |             | NCC(C)C(O)C          |            | OC(C1=CC=C(C)C)C=C1=O      |             | NCCO                  |            | OC([C@H](C)C)C(O)=O [S] |
| 408   | 130424091509260417022810 | 3      |             | NCCCN1C=CN=C1       |            | ClC(C)C=C([C@H](C)C)C(O)=O |             | NCC1=CC=C(C(F)F)F=C1 |            | ClC(C)C=C([C@H](C)C)C(O)=O |             | NCCCN1C=CC(C)C(C)C=C1 |            | ClC(C1=CC(C)C)O=C=C1    |
| 318   | 130224101501260617022810 | 3      |             | C1CNCCN1            |            | ClC(C)C=C(O)=CC=C1         |             | NCC1=CC=CC=C1        |            | OC(C1=CC=C(C)C)C=C1=O      |             | NCCCN1C=CC(C)C(C)C=C1 |            | ClC(C1=CC(C)C)O=C=C1    |
| 296   | 130224031509260417032810 | 3      |             | NCCOC               |            | ClC(C)C=C(O)=CC=C1         |             | NCC1=CC=C(C(F)F)F=C1 |            | ClC(C)C=C([C@H](C)C)C(O)=O |             | NCCCN1C=CC(C)C(C)C=C1 |            | OC([C@H](C)C)C(O)=O [S] |
| 305   | 130224051504260417032810 | 3      |             | NCC1=CC=C(C)C=C1    |            | ClC(C)C=C(O)=CC=C1         |             | NCCNC(C)=O           |            | OC(C1=CC=C(C)C)C=C1=O      |             | NCCCN1C=CC(C)C(C)C=C1 |            | OC([C@H](C)C)C(O)=O [S] |
| 231   | 130124031502260317032810 | 3      |             | NCCOC               |            | OC(C1=CSC(C)C)N1=O         |             | NCC1=CC=CC=C1        |            | OC(C1=CSC(C)C)N1=O         |             | NCCCN1C=CC(C)C(C)C=C1 |            | OC([C@H](C)C)C(O)=O [S] |
| 325   | 130324031502260817022810 | 3      |             | NCCOC               |            | OC(C1=CSC(C)C)N1=O         |             | NCC1=CC=C(C)C=C1     |            | OC(C1=CSC(C)C)N1=O         |             | NCCCN1C=CC(C)C(C)C=C1 |            | ClC(C1=CC(C)C)O=C=C1    |
| 329   | 130324031504260817022810 | 3      |             | NCCOC               |            | OC(C1=CSC(C)C)N1=O         |             | NCC1=CC=C(C)C=C1     |            | OC(C1=CSC(C)C)N1=O         |             | NCCCN1C=CC(C)C(C)C=C1 |            | ClC(C1=CC(C)C)O=C=C1    |
| 417   | 130424101504260617032805 | 3      |             | C1CNCCN1            |            | ClC(C)C=C([C@H](C)C)C(O)=O |             | NCC1=CC=CC=C1        |            | OC(C1=CC=C(C)C)C=C1=O      |             | NCC1CC(C)C=CC=C2=C2O1 |            | OC([C@H](C)C)C(O)=O [S] |
| 388   | 130424081510260417022805 | 3      |             | N1CCNCC1            |            | ClC(C)C=C([C@H](C)C)C(O)=O |             | CC(C)CN              |            | ClC(C)C=C([C@H](C)C)C(O)=O |             | NCC1CC(C)C=CC=C2=C2O1 |            | ClC(C1=CC(C)C)O=C=C1    |
| 407   | 130424091509260317032805 | 3      |             | NCCCN1C=CN=C1       |            | ClC(C)C=C([C@H](C)C)C(O)=O |             | NCC1=CC=C(C(F)F)F=C1 |            | ClC(C)C=C([C@H](C)C)C(O)=O |             | NCC1CC(C)C=CC=C2=C2O1 |            | OC([C@H](C)C)C(O)=O [S] |
| 292   | 130224031501260617022805 | 3      |             | NCCOC               |            | ClC(C)C=C(O)=CC=C1         |             | NCC1=CC=CC=C1        |            | OC(C1=CC=C(C)C)C=C1=O      |             | NCC1CC(C)C=CC=C2=C2O1 |            | ClC(C1=CC(C)C)O=C=C1    |



| Entry | Molecular ID               | Copies | Amines (X1) | Amines (X1)- smiles   | Acids (X1) | Acids (X1) smiles         | Amines (X2) | Amines (X2) smiles       | Acids (X2) | Acids (X2) smiles       | Amines (X3) | Amines (X3) smiles       | Acids (X3) | Acids (X3) smiles         |
|-------|----------------------------|--------|-------------|-----------------------|------------|---------------------------|-------------|--------------------------|------------|-------------------------|-------------|--------------------------|------------|---------------------------|
| 311   | 130224071501261017032805   | 3      |             | NCC1=CC=C(C)C=C1      |            | ClC1=CC(C(O)=O)=CC=C1     |             | NCC1=CC=C(C)C=C1         |            | ClC1=CC(C(O)=O)=CC=C1   |             | NCC1COC(C=C=C2)=C2O1     |            | OC(C@H)(C)C(O)=O [S]      |
| 316   | 130224081501260717032805   | 3      |             | NCCCN1C=CN=C1         |            | ClC1=CC(C(O)=O)=CC=C1     |             | NCC1=CC=C(N(C)C)C=C1     |            | ClC1=CC(C(O)=O)=CC=C1   |             | NCC1COC(C=C=C2)=C2O1     |            | OC(C@H)(C)C(O)=O [S]      |
| 286   | 130124101304281017012805   | 3      |             | C1CNCCN1              |            | OC(C1=CC(C(O)=O)=CC=C1)=O |             | NCC1=CC=C(C)C=C1         |            | ClC1=CC(C(O)=O)=CC=C1   |             | NCC1COC(C=C=C2)=C2O1     |            | OC(C1=CC(C(O)=O)=CC=C1)=O |
| 267   | 130124081501260517032805   | 3      |             | N1CCNCCC1             |            | OC(C1=CC(C(O)=O)=CC=C1)=O |             | NCC(C)C(O)               |            | ClC1=CC(C(O)=O)=CC=C1   |             | NCC1COC(C=C=C2)=C2O1     |            | OC(C@H)(C)C(O)=O [S]      |
| 243   | 130124051501260917022805   | 3      |             | NCC1=CC=C(OC(=O)C2=C1 |            | OC(C1=CC(C(O)=O)=CC=C1)=O |             | NCC1=CC(F)=CC(C(F)F)F=C1 |            | ClC1=CC(C(O)=O)=CC=C1   |             | NCC1COC(C=C=C2)=C2O1     |            | ClCC1=CC(C(O)=O)=CC=C1    |
| 365   | 130324101504260617032805   | 3      |             | C1CNCCN1              |            | OC(C1=CC(C(O)=O)=CC=C1)=O |             | NCC1=CC=C(C)C=C1         |            | ClC1=CC(C(O)=O)=CC=C1   |             | NCC1COC(C=C=C2)=C2O1     |            | OC(C@H)(C)C(O)=O [S]      |
| 397   | 130424081504260417032801   | 3      |             | N1CCNCCC1             |            | ClC(C)C=C(C@H)(C)C(O)=O   |             | NCCN(C)C(O)              |            | ClC1=CC=C(C)C=C1        |             | NCC1=CNC2=CC=CC=C21      |            | OC(C@H)(C)C(O)=O [S]      |
| 323   | 130224101510260317032801   | 3      |             | C1CNCCN1              |            | ClC1=CC(C(O)=O)=CC=C1     |             | CC(C)CCN                 |            | ClC(C)C=C(C@H)(C)C(O)=O |             | NCC1=CNC2=CC=CC=C21      |            | OC(C@H)(C)C(O)=O [S]      |
| 233   | 130124031503260817032801   | 3      |             | NCCCO                 |            | OC(C1=CC(C(O)=O)=CC=C1)=O |             | N(C@H)(C)C1=CC=CC=C1     |            | ClC1=CC(C(O)=O)=CC=C1   |             | NCC1=CNC2=CC=CC=C21      |            | OC(C@H)(C)C(O)=O [S]      |
| 254   | 13012407150126061017032801 | 3      |             | NCC1=CC=C(C)C=C1      |            | OC(C1=CC(C(O)=O)=CC=C1)=O |             | NCC1=CC=CC=C1            |            | ClC1=CC=C(C)C=C1        |             | NCC1=CNC2=CC=CC=C21      |            | OC(C@H)(C)C(O)=O [S]      |
| 349   | 130324071506260417032801   | 3      |             | NCC1=CC=C(C)C=C1      |            | OC(C1=CC(C(O)=O)=CC=C1)=O |             | NCC1=CC=CC(C(F)F)F=C1    |            | ClC(C)C=C(C@H)(C)C(O)=O |             | NCC1=CNC2=CC=CC=C21      |            | OC(C@H)(C)C(O)=O [S]      |
| 302   | 130224051503260417032807   | 3      |             | NCC1=CC=C(OC(=O)C2=C1 |            | ClC1=CC(C(O)=O)=CC=C1     |             | NCCN(C)C(O)              |            | ClC1=CC=C(C)C=C1        |             | NCC1=CC(O)C=C(O)C=C1     |            | OC(C@H)(C)C(O)=O [S]      |
| 382   | 130424041503260417092803   | 3      |             | NCC=C                 |            | ClC(C)C=C(C@H)(C)C(O)=O   |             | NCCN(C)C(O)              |            | ClC1=CC=C(C)C=C1        |             | N(C@H)(C)C1=CC=CC=C1 [R] |            | OC(C@H)(C)C(O)=O [S]      |
| 372   | 130424031501260417092804   | 3      |             | NCCCO                 |            | ClC(C)C=C(C@H)(C)C(O)=O   |             | NCCN(C)C(O)              |            | ClC1=CC=C(C)C=C1        |             | N(C@H)(C)C1=CC=CC=C1 [R] |            | CC(O)C(O)=O               |
| 373   | 130424031501261017092804   | 3      |             | NCCCO                 |            | ClC(C)C=C(C@H)(C)C(O)=O   |             | NCC1=CC=C(C)C=C1         |            | ClC(C)C=C(C@H)(C)C(O)=O |             | N(C@H)(C)C1=CC=CC=C1 [R] |            | CC(O)C(O)=O               |
| 277   | 130424031603261017092803   | 3      |             | NCCCO                 |            | ClC(C)C=C(C@H)(C)C(O)=O   |             | NCC1=CC=C(C)C=C1         |            | ClC(C)C=C(C@H)(C)C(O)=O |             | N(C@H)(C)C1=CC=CC=C1 [R] |            | OC(C@H)(C)C(O)=O [S]      |
| 390   | 130424081503260417092804   | 3      |             | N1CCNCCC1             |            | ClC(C)C=C(C@H)(C)C(O)=O   |             | NCCN(C)C(O)              |            | ClC1=CC=C(C)C=C1        |             | N(C@H)(C)C1=CC=CC=C1 [R] |            | CC(O)C(O)=O               |
| 435   | 130924041510260117092804   | 3      |             | NCC1CCOCC1            |            | ClC(C)C=C(C@H)(C)C(O)=O   |             | CC(C)CCN                 |            | ClC(C)C=C(C@H)(C)C(O)=O |             | N(C@H)(C)C1=CC=CC=C1 [R] |            | CC(O)C(O)=O               |
| 403   | 130424091502260517092804   | 3      |             | NCCCN1C=CN=C1         |            | ClC(C)C=C(C@H)(C)C(O)=O   |             | NCC(C)C(O)               |            | ClC1=CC=C(C)C=C1        |             | N(C@H)(C)C1=CC=CC=C1 [R] |            | CC(O)C(O)=O               |
| 447   | 131024041503260417092804   | 3      |             | NCC1=CC(F)=C(F)C=C1   |            | ClC(C)C=C(C@H)(C)C(O)=O   |             | NCCN(C)C(O)              |            | ClC1=CC=C(C)C=C1        |             | N(C@H)(C)C1=CC=CC=C1 [R] |            | CC(O)C(O)=O               |
| 360   | 130424051506260117092803   | 3      |             | NCC1=CC=C(OC(=O)C2=C1 |            | ClC(C)C=C(C@H)(C)C(O)=O   |             | NCC1=CC=CC(C(F)F)F=C1    |            | ClC(C)C=C(C@H)(C)C(O)=O |             | N(C@H)(C)C1=CC=CC=C1 [R] |            | OC(C@H)(C)C(O)=O [S]      |
| 297   | 130224041504260417092804   | 3      |             | NCC=C                 |            | ClC1=CC(C(O)=O)=CC=C1     |             | NCCN(C)C(O)              |            | ClC1=CC=C(C)C=C1        |             | N(C@H)(C)C1=CC=CC=C1 [R] |            | CC(O)C(O)=O               |
| 290   | 130224041509260217092804   | 3      |             | NCC=C                 |            | ClC1=CC(C(O)=O)=CC=C1     |             | NCC1=CC=CC(C(F)F)F=C1    |            | ClC(C)C=C(C@H)(C)C(O)=O |             | N(C@H)(C)C1=CC=CC=C1 [R] |            | CC(O)C(O)=O               |
| 324   | 130224101510260317092804   | 3      |             | C1CNCCN1              |            | ClC1=CC(C(O)=O)=CC=C1     |             | CC(C)CCN                 |            | ClC(C)C=C(C@H)(C)C(O)=O |             | N(C@H)(C)C1=CC=CC=C1 [R] |            | CC(O)C(O)=O               |
| 308   | 130224061503260817092804   | 3      |             | NCC1=CC=C(O)C=C1      |            | ClC1=CC(C(O)=O)=CC=C1     |             | N(C@H)(C)C1=CC=CC=C1     |            | ClC1=CC(C(O)=O)=CC=C1   |             | N(C@H)(C)C1=CC=CC=C1 [R] |            | CC(O)C(O)=O               |
| 310   | 130224071501260517092804   | 3      |             | NCC1=CC=C(C)C=C1      |            | ClC1=CC(C(O)=O)=CC=C1     |             | NCC(C)C(O)               |            | ClC1=CC=C(C)C=C1        |             | N(C@H)(C)C1=CC=CC=C1 [R] |            | CC(O)C(O)=O               |
| 423   | 130924021504260717092804   | 3      |             | NCC1CCOCC1            |            | ClC1=CC(C(O)=O)=CC=C1     |             | NCC1=CC=C(N(C)C)C=C1     |            | ClC1=CC(C(O)=O)=CC=C1   |             | N(C@H)(C)C1=CC=CC=C1 [R] |            | CC(O)C(O)=O               |
| 425   | 130924021509260417092804   | 3      |             | NCC1CCOCC1            |            | ClC1=CC(C(O)=O)=CC=C1     |             | NCC1=CC=CC(C(F)F)F=C1    |            | ClC(C)C=C(C@H)(C)C(O)=O |             | N(C@H)(C)C1=CC=CC=C1 [R] |            | CC(O)C(O)=O               |
| 240   | 130124041504260417092804   | 3      |             | NCC=C                 |            | OC(C1=CC(C(O)=O)=CC=C1)=O |             | NCCN(C)C(O)              |            | ClC1=CC=C(C)C=C1        |             | N(C@H)(C)C1=CC=CC=C1 [R] |            | CC(O)C(O)=O               |
| 230   | 130124031501260417092804   | 3      |             | NCCCO                 |            | OC(C1=CC(C(O)=O)=CC=C1)=O |             | NCCN(C)C(O)              |            | ClC1=CC=C(C)C=C1        |             | N(C@H)(C)C1=CC=CC=C1 [R] |            | CC(O)C(O)=O               |
| 270   | 130124081503260517092804   | 3      |             | N1CCNCCC1             |            | OC(C1=CC(C(O)=O)=CC=C1)=O |             | NCC(C)C(O)               |            | ClC1=CC=C(C)C=C1        |             | N(C@H)(C)C1=CC=CC=C1 [R] |            | CC(O)C(O)=O               |
| 258   | 130124071501260917092804   | 3      |             | NCC1=CC=C(C)C=C1      |            | OC(C1=CC(C(O)=O)=CC=C1)=O |             | NCC1=CC(F)=CC(C(F)F)F=C1 |            | ClC1=CC(C(O)=O)=CC=C1   |             | N(C@H)(C)C1=CC=CC=C1 [R] |            | CC(O)C(O)=O               |
| 260   | 130124071502261017092804   | 3      |             | NCC1=CC=C(C)C=C1      |            | OC(C1=CC(C(O)=O)=CC=C1)=O |             | NCC1=CC=C(C)C=C1         |            | ClC(C)C=C(C@H)(C)C(O)=O |             | N(C@H)(C)C1=CC=CC=C1 [R] |            | CC(O)C(O)=O               |
| 228   | 130124011502260917092802   | 3      |             | NCC1=CC=C(Br)C=C1     |            | OC(C1=CC(C(O)=O)=CC=C1)=O |             | NCC1=CC(F)=CC(C(F)F)F=C1 |            | ClC1=CC(C(O)=O)=CC=C1   |             | N(C@H)(C)C1=CC=CC=C1 [R] |            | ClCC1=CC(C(O)=O)=CC=C1    |

| Entry | Molecular ID             | Copies | Amines (X1) | Amines (X1)- smiles   | Acids (X1) | Acids (X1) smiles           | Amines (X2) | Amines (X2) smiles        | Acids (X2) | Acids (X2) smiles     | Amines (X3) | Amines (X3) smiles        | Acids (X3) | Acids (X3) smiles |
|-------|--------------------------|--------|-------------|-----------------------|------------|-----------------------------|-------------|---------------------------|------------|-----------------------|-------------|---------------------------|------------|-------------------|
| 272   | 130124091501260517092802 | 3      |             | NCCN1C=CN=C1          |            | OC(C)=COC(C)(Cl)N1=O        |             | NCC(C)(Cl)O               |            | OC(C)=CC=C(C)(Cl)C1=O |             | N[C@@H](C)C1=CC=CC=C1 [R] |            | OC(C)=C(C)(Cl)O   |
| 276   | 130124091502260717092804 | 3      |             | NCCN1C=CN=C1          |            | OC(C)=COC(C)(Cl)N1=O        |             | NCC1=CC=C(N(C)C)C=C1      |            | OC(C)=C(C)(Cl)N1=O    |             | N[C@@H](C)C1=CC=CC=C1 [R] |            | OC(C)O            |
| 361   | 130324101302260517092804 | 3      |             | C1CNCCN1              |            | OC(C)=C(C)(Cl)N1=O          |             | NCC(C)(Cl)O               |            | OC(C)=CC=C(C)(Cl)C1=O |             | N[C@@H](C)C1=CC=CC=C1 [R] |            | OC(C)O            |
| 347   | 130324071503260317092804 | 3      |             | NCC1=CC=C(C)C=C1      |            | OC(C)=C(C)(Cl)N1=O          |             | NCC1=CC=C(S1)             |            | OC(C)=COC(C)(Cl)N1=O  |             | N[C@@H](C)C1=CC=CC=C1 [R] |            | OC(C)O            |
| 350   | 130324071509260417092804 | 3      |             | NCC1=CC=C(C)C=C1      |            | OC(C)=C(C)(Cl)N1=O          |             | NCC1=CC=CC(F)F=C1         |            | OC(C)=C(C)(Cl)N1=O    |             | N[C@@H](C)C1=CC=CC=C1 [R] |            | OC(C)O            |
| 356   | 130324091502260317092804 | 3      |             | NCCN1C=CN=C1          |            | OC(C)=C(C)(Cl)N1=O          |             | NCC1=CC=C(S1)             |            | OC(C)=COC(C)(Cl)N1=O  |             | N[C@@H](C)C1=CC=CC=C1 [R] |            | OC(C)O            |
| 338   | 130324051504260617092804 | 3      |             | NCC1=CC=C(OC2=C2)C=C1 |            | OC(C)=C(C)(Cl)N1=O          |             | NCC1=CC=CC=C1             |            | OC(C)=CC=C(C)(Cl)C1=O |             | N[C@@H](C)C1=CC=CC=C1 [R] |            | OC(C)O            |
| 342   | 130324051510260417092804 | 3      |             | NCC1=CC=C(OC2=C2)C=C1 |            | OC(C)=C(C)(Cl)N1=O          |             | CC(C)CN                   |            | OC(C)=C(C)(Cl)N1=O    |             | N[C@@H](C)C1=CC=CC=C1 [R] |            | OC(C)O            |
| 383   | 130424041504260317102804 | 3      |             | NCC=C                 |            | ClC(C)C=C(C)[C@@H](C)C(O)=O |             | NCC1=CC=C(S1)             |            | OC(C)=COC(C)(Cl)N1=O  |             | N[C@@H](C)C1=CC=CC=C1 [R] |            | OC(C)O            |
| 384   | 130424041504260717102804 | 3      |             | NCC=C                 |            | ClC(C)C=C(C)[C@@H](C)C(O)=O |             | NCC1=CC=C(N(C)C)C=C1      |            | OC(C)=C(C)(Cl)N1=O    |             | N[C@@H](C)C1=CC=CC=C1 [R] |            | OC(C)O            |
| 371   | 130424031501260117102804 | 3      |             | NCCOC                 |            | ClC(C)C=C(C)[C@@H](C)C(O)=O |             | NCCOC                     |            | OC(C)=COC(C)(Cl)N1=O  |             | N[C@@H](C)C1=CC=CC=C1 [R] |            | OC(C)O            |
| 378   | 130424031504260917102804 | 3      |             | NCCOC                 |            | ClC(C)C=C(C)[C@@H](C)C(O)=O |             | NCC1=CC(F)=CC(C)(F)F=C1   |            | OC(C)=C(C)(Cl)N1=O    |             | N[C@@H](C)C1=CC=CC=C1 [R] |            | OC(C)O            |
| 381   | 130424031510260317102802 | 3      |             | NCCOC                 |            | ClC(C)C=C(C)[C@@H](C)C(O)=O |             | CC(C)CN                   |            | OC(C)=C(C)(Cl)N1=O    |             | N[C@@H](C)C1=CC=CC=C1 [R] |            | OC(C)O            |
| 392   | 130424061502260317102804 | 3      |             | NCC1=CC=C(O)C=C1      |            | ClC(C)C=C(C)[C@@H](C)C(O)=O |             | NCC1=CC=C(S1)             |            | OC(C)=COC(C)(Cl)N1=O  |             | N[C@@H](C)C1=CC=CC=C1 [R] |            | OC(C)O            |
| 399   | 130424091501260417102804 | 3      |             | NCCN1C=CN=C1          |            | ClC(C)C=C(C)[C@@H](C)C(O)=O |             | NCCN(C)=O                 |            | OC(C)=CC=C(C)(Cl)C1=O |             | N[C@@H](C)C1=CC=CC=C1 [R] |            | OC(C)O            |
| 400   | 130424091501260917102803 | 3      |             | NCCN1C=CN=C1          |            | ClC(C)C=C(C)[C@@H](C)C(O)=O |             | NCC1=CC(F)=CC(C)(F)F=C1   |            | OC(C)=C(C)(Cl)N1=O    |             | N[C@@H](C)C1=CC=CC=C1 [R] |            | OC(C)O            |
| 380   | 130424051501260617102804 | 3      |             | NCC1=CC=C(C)C=C1      |            | ClC(C)C=C(C)[C@@H](C)C(O)=O |             | NCC1=CC=C(C)C=C1          |            | OC(C)=CC=C(C)(Cl)C1=O |             | N[C@@H](C)C1=CC=CC=C1 [R] |            | OC(C)O            |
| 389   | 130424051503261017102803 | 3      |             | NCC1=CC=C(OC2=C2)C=C1 |            | ClC(C)C=C(C)[C@@H](C)C(O)=O |             | NCC1=CC=C(C)C=C1          |            | OC(C)=C(C)(Cl)N1=O    |             | N[C@@H](C)C1=CC=CC=C1 [R] |            | OC(C)O            |
| 293   | 130224031503260817102804 | 3      |             | NCCOC                 |            | ClC(C)C=C(C)(O)=CC=C1       |             | N[C@@H](C)C1=CC=CC=C1 [R] |            | OC(C)=C(C)(Cl)N1=O    |             | N[C@@H](C)C1=CC=CC=C1 [R] |            | OC(C)O            |
| 420   | 130924021502260717102804 | 3      |             | NCC1CCOCC1            |            | ClC(C)C=C(C)(O)=CC=C1       |             | NCC1=CC=C(N(C)C)C=C1      |            | OC(C)=C(C)(Cl)N1=O    |             | N[C@@H](C)C1=CC=CC=C1 [R] |            | OC(C)O            |
| 424   | 130924021504260817102804 | 3      |             | NCC1CCOCC1            |            | ClC(C)C=C(C)(O)=CC=C1       |             | N[C@@H](C)C1=CC=CC=C1 [R] |            | OC(C)=C(C)(Cl)N1=O    |             | N[C@@H](C)C1=CC=CC=C1 [R] |            | OC(C)O            |
| 317   | 130224091503260317102804 | 3      |             | NCCN1C=CN=C1          |            | ClC(C)C=C(C)(O)=CC=C1       |             | NCC1=CC=C(S1)             |            | OC(C)=COC(C)(Cl)N1=O  |             | N[C@@H](C)C1=CC=CC=C1 [R] |            | OC(C)O            |
| 430   | 131024021501260317102804 | 3      |             | NCC1=CC(F)=CC(C)F=C1  |            | ClC(C)C=C(C)(O)=CC=C1       |             | NCC1=CC=C(S1)             |            | OC(C)=C(C)(Cl)N1=O    |             | N[C@@H](C)C1=CC=CC=C1 [R] |            | OC(C)O            |
| 306   | 130224051509260317102804 | 3      |             | NCC1=CC=C(OC2=C2)C=C1 |            | ClC(C)C=C(C)(O)=CC=C1       |             | NCC1=CC=C(C)(F)F=C1       |            | OC(C)=C(C)(Cl)N1=O    |             | N[C@@H](C)C1=CC=CC=C1 [R] |            | OC(C)O            |
| 307   | 130224051510260217102804 | 3      |             | NCC1=CC=C(OC2=C2)C=C1 |            | ClC(C)C=C(C)(O)=CC=C1       |             | CC(C)CN                   |            | OC(C)=C(C)(Cl)N1=O    |             | N[C@@H](C)C1=CC=CC=C1 [R] |            | OC(C)O            |
| 238   | 130124041502260417102803 | 3      |             | NCC=C                 |            | OC(C)=COC(C)(Cl)N1=O        |             | NCCN(C)=O                 |            | OC(C)=CC=C(C)(Cl)C1=O |             | N[C@@H](C)C1=CC=CC=C1 [R] |            | OC(C)O            |
| 241   | 130124041510260317102803 | 3      |             | NCC=C                 |            | OC(C)=COC(C)(Cl)N1=O        |             | CC(C)CN                   |            | OC(C)=C(C)(Cl)N1=O    |             | N[C@@H](C)C1=CC=CC=C1 [R] |            | OC(C)O            |
| 284   | 130124101503260717102804 | 3      |             | C1CNCCN1              |            | OC(C)=COC(C)(Cl)N1=O        |             | NCC1=CC=C(N(C)C)C=C1      |            | OC(C)=C(C)(Cl)N1=O    |             | N[C@@H](C)C1=CC=CC=C1 [R] |            | OC(C)O            |
| 251   | 130124081510260317102804 | 3      |             | NCC1=CC=C(O)C=C1      |            | OC(C)=C(C)(Cl)N1=O          |             | CC(C)CN                   |            | OC(C)=C(C)(Cl)N1=O    |             | N[C@@H](C)C1=CC=CC=C1 [R] |            | OC(C)O            |
| 222   | 130124071501260117102804 | 3      |             | NCC1=CC=C(C)C=C1      |            | OC(C)=COC(C)(Cl)N1=O        |             | NCCOC                     |            | OC(C)=C(C)(Cl)N1=O    |             | N[C@@H](C)C1=CC=CC=C1 [R] |            | OC(C)O            |
| 264   | 130124071509260117102803 | 3      |             | NCC1=CC=C(C)C=C1      |            | OC(C)=COC(C)(Cl)N1=O        |             | NCC1=CC=C(C)(F)F=C1       |            | OC(C)=C(C)(Cl)N1=O    |             | N[C@@H](C)C1=CC=CC=C1 [R] |            | OC(C)O            |
| 437   | 131024011510260317102804 | 3      |             | NCC1=CC(F)=CC(C)F=C1  |            | OC(C)=C(C)(Cl)N1=O          |             | CC(C)CN                   |            | OC(C)=C(C)(Cl)N1=O    |             | N[C@@H](C)C1=CC=CC=C1 [R] |            | OC(C)O            |
| 360   | 130324101502260217102804 | 3      |             | C1CNCCN1              |            | OC(C)=C(C)(Cl)N1=O          |             | NCC1=CC=C(S(=O)(=O)C)C=C1 |            | OC(C)=COC(C)(Cl)N1=O  |             | N[C@@H](C)C1=CC=CC=C1 [R] |            | OC(C)O            |
| 327   | 130324031503260517102804 | 3      |             | NCCOC                 |            | OC(C)=C(C)(Cl)N1=O          |             | NCC(C)(Cl)O               |            | OC(C)=CC=C(C)(Cl)C1=O |             | N[C@@H](C)C1=CC=CC=C1 [R] |            | OC(C)O            |

| Entry | Molecular ID             | Copies | Amines (X1) | Amines (X1): smiles   | Acids (X1) | Acids (X1) smiles      | Amines (X2) | Amines (X2) smiles        | Acids (X2) | Acids (X2) smiles         | Amines (X3) | Amines (X3) smiles       | Acids (X3) | Acids (X3) smiles     |
|-------|--------------------------|--------|-------------|-----------------------|------------|------------------------|-------------|---------------------------|------------|---------------------------|-------------|--------------------------|------------|-----------------------|
| 352   | 130324081503261017102804 | 3      |             | N1CCNCCC1             |            | OC(C1=CSC(C(=O)N1)=O   |             | NCC1=CC=C(C)C=C1          |            | OC(C)C=C(C)C(C)C(C)C(O)=O |             | N[C@@H](C)C1=CC=CC=C1[S] |            | O=C(O)C1=C(C)OC=C1    |
| 353   | 130324081503261017102804 | 3      |             | N1CCNCCC1             |            | OC(C1=CSC(C(=O)N1)=O   |             | NCCN(C)=O                 |            | OC(C1=CC=C(C)C)C=C1=O     |             | N[C@@H](C)C1=CC=CC=C1[S] |            | O=C(O)C1=C(C)OC=C1    |
| 355   | 130324081510280417102802 | 3      |             | N1CCNCCC1             |            | OC(C1=CSC(C(=O)N1)=O   |             | CC(C)CCN                  |            | OC(C)C=C(C)C(C)C(C)C(O)=O |             | N[C@@H](C)C1=CC=CC=C1[S] |            | O=C(C1=CC(C)O)CC=C1   |
| 343   | 130324081509260217102804 | 3      |             | NCC1=CC=C(O1)         |            | OC(C1=CSC(C(=O)N1)=O   |             | NCC1=CC=C(C(F)F)C=C1      |            | OC(C)C=C(C)C(C)C(C)C(O)=O |             | N[C@@H](C)C1=CC=CC=C1[S] |            | O=C(O)C1=C(C)OC=C1    |
| 429   | 130924031503260817102804 | 3      |             | NCC1CCOCC1            |            | OC(C1=CSC(C(=O)N1)=O   |             | N[C@@H](C)C1=CC=CC=C1     |            | OC(C1=CSC(C(=O)N1)=O      |             | N[C@@H](C)C1=CC=CC=C1[S] |            | O=C(O)C1=C(C)OC=C1    |
| 430   | 130924031504260317102804 | 3      |             | NCC1CCOCC1            |            | OC(C1=CSC(C(=O)N1)=O   |             | NCC1=CC=C(S1)             |            | OC(C1=CC=C(C)C)N1=O       |             | N[C@@H](C)C1=CC=CC=C1[S] |            | O=C(O)C1=C(C)OC=C1    |
| 433   | 130924031510280317102802 | 3      |             | NCC1CCOCC1            |            | OC(C1=CSC(C(=O)N1)=O   |             | CC(C)CCN                  |            | OC(C)C=C(C)C(C)C(C)C(O)=O |             | N[C@@H](C)C1=CC=CC=C1[S] |            | O=C(C1=CC(C)O)CC=C1   |
| 446   | 131024031510280417102803 | 3      |             | NCC1=CC(F)=C(F)C=C1   |            | OC(C1=CSC(C(=O)N1)=O   |             | CC(C)CCN                  |            | OC(C)C=C(C)C(C)C(C)C(O)=O |             | N[C@@H](C)C1=CC=CC=C1[S] |            | O=C(C=C)C(C)C(O) [S]  |
| 332   | 130324051501260417102804 | 3      |             | NCC1=CC=C(OC)C2=C2=C1 |            | OC(C1=CSC(C(=O)N1)=O   |             | NCCN(C)=O                 |            | OC(C1=CC=C(C)C)C=C1=O     |             | N[C@@H](C)C1=CC=CC=C1[S] |            | O=C(O)C1=C(C)OC=C1    |
| 333   | 130324051502260617102801 | 3      |             | NCC1=CC=C(OC)C2=C2=C1 |            | OC(C1=CSC(C(=O)N1)=O   |             | NCC1=CC=C(C)C=C1          |            | OC(C1=CC=C(C)C)C=C1=O     |             | N[C@@H](C)C1=CC=CC=C1[S] |            | OC(C1=CSC(C(=O)N1)=O  |
| 336   | 130324051503260817102804 | 3      |             | NCC1=CC=C(OC)C2=C2=C1 |            | OC(C1=CSC(C(=O)N1)=O   |             | N[C@@H](C)C1=CC=CC=C1     |            | OC(C1=CSC(C(=O)N1)=O      |             | N[C@@H](C)C1=CC=CC=C1[S] |            | O=C(O)C1=C(C)OC=C1    |
| 414   | 130424101502260417012806 | 3      |             | C1CNCCN1              |            | O=C(C)C=C(C)C(C)C(O)=O |             | NCCN(C)=O                 |            | OC(C1=CC=C(C)C)C=C1=O     |             | N[C@@H](C)C1=CC=CC=C1    |            | O=C(C1=CSC(C(=O)N1)=O |
| 380   | 130424031509260217032806 | 3      |             | NCCOC                 |            | ClC(C)C=C(C)C(C)C(O)=O |             | NCC1=CC=C(C(F)F)C=C1      |            | OC(C)C=C(C)C(C)C(C)C(O)=O |             | N[C@@H](C)C1=CC=CC=C1    |            | O=C(C=C)C(C)C(O) [S]  |
| 387   | 130424051502260717012806 | 3      |             | NCC1=CC=C(OC)C2=C2=C1 |            | ClC(C)C=C(C)C(C)C(O)=O |             | NCC1=CC=C(N(C)C)C=C1      |            | OC(C1=CSC(C(=O)N1)=O      |             | N[C@@H](C)C1=CC=CC=C1    |            | O=C(C1=CSC(C(=O)N1)=O |
| 312   | 130224071503260417012806 | 3      |             | NCC1=CC=C(C)C=C1      |            | ClC(C)C=C(C)C(O)=CC=C1 |             | NCCN(C)=O                 |            | OC(C1=CC=C(C)C)C=C1=O     |             | N[C@@H](C)C1=CC=CC=C1    |            | O=C(C1=CSC(C(=O)N1)=O |
| 247   | 130124061603260417032806 | 3      |             | NCC1=CC=C(OC)C2=C2=C1 |            | OC(C1=CSC(C(=O)N1)=O   |             | NCCN(C)=O                 |            | OC(C1=CC=C(C)C)C=C1=O     |             | N[C@@H](C)C1=CC=CC=C1    |            | O=C(C=C)C(C)C(O) [S]  |
| 363   | 130324101504260617022806 | 3      |             | C1CNCCN1              |            | OC(C1=CSC(C(=O)N1)=O   |             | NCC1=CC=C(C)C=C1          |            | OC(C1=CC=C(C)C)C=C1=O     |             | N[C@@H](C)C1=CC=CC=C1    |            | O=C(C1=CC(C)O)CC=C1   |
| 415   | 130424101503260817012803 | 3      |             | C1CNCCN1              |            | ClC(C)C=C(C)C(C)C(O)=O |             | NCC1=CC=C(C)C=C1          |            | OC(C1=CC=C(C)C)C=C1=O     |             | NCCCN1C=CN=C1            |            | O=C(C1=CSC(C(=O)N1)=O |
| 374   | 130424031503260217032803 | 3      |             | NCCOC                 |            | ClC(C)C=C(C)C(C)C(O)=O |             | NCC1=CC=C(S(=O)(=O)C)C=C1 |            | OC(C1=CC=C(C)C)N1=O       |             | NCCCN1C=CN=C1            |            | O=C(C=C)C(C)C(O) [S]  |
| 379   | 130424031509260117042803 | 3      |             | NCCOC                 |            | ClC(C)C=C(C)C(C)C(O)=O |             | NCC1=CC=C(C(F)F)C=C1      |            | OC(C)C=C(C)C(C)C(C)C(O)=O |             | NCCCN1C=CN=C1            |            | O=C(C=C)C(C)C(O) [R]  |
| 368   | 130424021501260517012803 | 3      |             | NCC1=CC=CN=C1         |            | ClC(C)C=C(C)C(C)C(O)=O |             | NCC1=CC=CC=C1             |            | OC(C1=CC=C(C)C)C=C1=O     |             | NCCCN1C=CN=C1            |            | O=C(C=C)C(C)C(O) [S]  |
| 370   | 130424021504260717032803 | 3      |             | NCC1=CC=CN=C1         |            | ClC(C)C=C(C)C(C)C(O)=O |             | NCC1=CC=C(N(C)C)C=C1      |            | OC(C1=CSC(C(=O)N1)=O      |             | NCCCN1C=CN=C1            |            | O=C(C=C)C(C)C(O) [S]  |
| 303   | 130424071501260517012803 | 3      |             | NCC1=CC=C(C)C=C1      |            | ClC(C)C=C(C)C(C)C(O)=O |             | NCC(O)C(O)C               |            | OC(C1=CC=C(C)C)C=C1=O     |             | NCCCN1C=CN=C1            |            | O=C(C1=CSC(C(=O)N1)=O |
| 434   | 130924041503260317032803 | 3      |             | NCC1CCOCC1            |            | ClC(C)C=C(C)C(C)C(O)=O |             | NCC1=CC=C(S1)             |            | OC(C1=CC=C(C)C)N1=O       |             | NCCCN1C=CN=C1            |            | O=C(C=C)C(C)C(O) [S]  |
| 401   | 130424091502260217032803 | 3      |             | NCCCN1C=CN=C1         |            | ClC(C)C=C(C)C(C)C(O)=O |             | NCC1=CC=C(S(=O)(=O)C)C=C1 |            | OC(C1=CC=C(C)C)N1=O       |             | NCCCN1C=CN=C1            |            | O=C(C=C)C(C)C(O) [S]  |
| 402   | 130424091502260317022803 | 3      |             | NCCCN1C=CN=C1         |            | ClC(C)C=C(C)C(C)C(O)=O |             | NCC1=CC=C(S1)             |            | OC(C1=CC=C(C)C)N1=O       |             | NCCCN1C=CN=C1            |            | O=C(C1=CC(C)O)CC=C1   |
| 448   | 131024041504260817032803 | 3      |             | NCC1=CC(F)=C(F)C=C1   |            | ClC(C)C=C(C)C(C)C(O)=O |             | N[C@@H](C)C1=CC=CC=C1     |            | OC(C1=CSC(C(=O)N1)=O      |             | NCCCN1C=CN=C1            |            | O=C(C=C)C(C)C(O) [S]  |
| 386   | 130424051502260817022803 | 3      |             | NCC1=CC=C(OC)C2=C2=C1 |            | ClC(C)C=C(C)C(C)C(O)=O |             | NCC1=CC=CC=C1             |            | OC(C1=CC=C(C)C)C=C1=O     |             | NCCCN1C=CN=C1            |            | O=C(C1=C(C)O)CC=C1    |
| 388   | 130424051503260217032803 | 3      |             | NCC1=CC=C(OC)C2=C2=C1 |            | ClC(C)C=C(C)C(C)C(O)=O |             | NCC1=CC=C(S(=O)(=O)C)C=C1 |            | OC(C1=CC=C(C)C)N1=O       |             | NCCCN1C=CN=C1            |            | O=C(C=C)C(C)C(O) [S]  |
| 299   | 130224041509260417032803 | 3      |             | NCC=C                 |            | ClC(C)C=C(C)C(O)=CC=C1 |             | NCC1=CC=C(C(F)F)C=C1      |            | OC(C)C=C(C)C(C)C(C)C(O)=O |             | NCCCN1C=CN=C1            |            | O=C(C=C)C(C)C(O) [S]  |
| 320   | 130224101502260717032803 | 3      |             | C1CNCCN1              |            | ClC(C)C=C(C)C(O)=CC=C1 |             | NCC1=CC=C(N(C)C)C=C1      |            | OC(C1=CSC(C(=O)N1)=O      |             | NCCCN1C=CN=C1            |            | O=C(C=C)C(C)C(O) [S]  |
| 284   | 130224031504260817032803 | 3      |             | NCCOC                 |            | ClC(C)C=C(C)C(O)=CC=C1 |             | N[C@@H](C)C1=CC=CC=C1     |            | OC(C1=CSC(C(=O)N1)=O      |             | NCCCN1C=CN=C1            |            | O=C(C=C)C(C)C(O) [S]  |
| 295   | 130224031504261017012803 | 3      |             | NCCOC                 |            | ClC(C)C=C(C)C(O)=CC=C1 |             | NCC1=CC=C(C)C=C1          |            | OC(C)C=C(C)C(C)C(C)C(O)=O |             | NCCCN1C=CN=C1            |            | O=C(C1=CSC(C(=O)N1)=O |
| 309   | 130224071501260217012803 | 3      |             | NCC1=CC=C(C)C=C1      |            | ClC(C)C=C(C)C(O)=CC=C1 |             | NCC1=CC=C(S(=O)(=O)C)C=C1 |            | OC(C1=CC=C(C)C)N1=O       |             | NCCCN1C=CN=C1            |            | O=C(C1=CSC(C(=O)N1)=O |

| Entry | Molecular ID             | Copies | Amines (X1) | Amines (X1)- smiles   | Acids (X1) | Acids (X1) smiles     | Amines (X2) | Amines (X2) smiles        | Acids (X2) | Acids (X2) smiles          | Amines (X3) | Amines (X3) smiles | Acids (X3) | Acids (X3) smiles     |
|-------|--------------------------|--------|-------------|-----------------------|------------|-----------------------|-------------|---------------------------|------------|----------------------------|-------------|--------------------|------------|-----------------------|
| 289   | 130224011503260717032803 | 3      |             | NCC1=CC=C(C(Br)=C1    |            | ClC1=CC(C(O)=O)=CC=C1 |             | NCC1=CC=C(N(C)C)C=C1      |            | ClC1=CSC(C(C)=N1)=O        |             | NCCCN1C=CN=C1      |            | OC([C@@H](C)C)O=[S]   |
| 422   | 139924021401260417032803 | 3      |             | NCCC1CCOCC1           |            | ClC1=CC(C(O)=O)=CC=C1 |             | NCCNC(C)=O                |            | OC(C1=CC=C(C(C)C)C=C1)=O   |             | NCCCN1C=CN=C1      |            | OC([C@@H](C)C)O=[S]   |
| 313   | 130224091301260417032803 | 3      |             | NCCCN1C=CN=C1         |            | ClC1=CC(C(O)=O)=CC=C1 |             | NCCNC(C)=O                |            | OC(C1=CC=C(C(C)C)C=C1)=O   |             | NCCCN1C=CN=C1      |            | OC([C@@H](C)C)O=[S]   |
| 314   | 130224091501260517032803 | 3      |             | NCCCN1C=CN=C1         |            | ClC1=CC(C(O)=O)=CC=C1 |             | NCCNC(C)=O                |            | OC(C1=CC=C(C(C)C)C=C1)=O   |             | NCCCN1C=CN=C1      |            | OC([C@@H](C)C)O=[S]   |
| 439   | 131024021503260417032803 | 3      |             | NCC1=CC(F)=C(F)C=C1   |            | ClC1=CC(C(O)=O)=CC=C1 |             | NCCNC(C)=O                |            | OC(C1=CC=C(C(C)C)C=C1)=O   |             | NCCCN1C=CN=C1      |            | OC([C@@H](C)C)O=[S]   |
| 300   | 130224051501260517022803 | 3      |             | NCC1=CC=C(OCOC2=C2=C1 |            | ClC1=CC(C(O)=O)=CC=C1 |             | NCC(C)C(O)O               |            | OC(C1=CC=C(C(C)C)C=C1)=O   |             | NCCCN1C=CN=C1      |            | ClC1=CC(C(O)=O)=CC=C1 |
| 301   | 130224051501260917042803 | 3      |             | NCC1=CC=C(OCOC2=C2=C1 |            | ClC1=CC(C(O)=O)=CC=C1 |             | NCC1=CC(F)=CC(C(F)F)F=C1  |            | ClC1=CSC(C(C)=N1)=O        |             | NCCCN1C=CN=C1      |            | OC([C@@H](C)C)O=[R]   |
| 237   | 130124041501261017042803 | 3      |             | NCC=C                 |            | OC(C1=CC(C)C)N1=O     |             | NCC1=CC=C(C)C=C1          |            | ClC(C)=C([C@@H](C)C)C(O)=O |             | NCCCN1C=CN=C1      |            | OC([C@@H](C)C)O=[R]   |
| 283   | 130124101503260717032803 | 3      |             | C1CNCCN1              |            | OC(C1=CC(C)C)N1=O     |             | NCC1=CC=C(N(C)C)C=C1      |            | OC(C1=CSC(C(C)=N1)=O       |             | NCCCN1C=CN=C1      |            | OC([C@@H](C)C)O=[S]   |
| 285   | 130124101503260817032803 | 3      |             | C1CNCCN1              |            | OC(C1=CC(C)C)N1=O     |             | NCC1=CC=C(N(C)C)C=C1      |            | ClC1=CSC(C(C)=N1)=O        |             | NCCCN1C=CN=C1      |            | OC([C@@H](C)C)O=[S]   |
| 286   | 130124101503260817042803 | 3      |             | C1CNCCN1              |            | OC(C1=CC(C)C)N1=O     |             | NCC1=CC=C(N(C)C)C=C1      |            | ClC1=CSC(C(C)=N1)=O        |             | NCCCN1C=CN=C1      |            | OC([C@@H](C)C)O=[R]   |
| 287   | 130124101504260917032803 | 3      |             | C1CNCCN1              |            | OC(C1=CC(C)C)N1=O     |             | NCC1=CC=CC=C1             |            | OC(C1=CC=C(C(C)C)C=C1)=O   |             | NCCCN1C=CN=C1      |            | OC([C@@H](C)C)O=[S]   |
| 232   | 130124031502260717032803 | 3      |             | NCCOC                 |            | OC(C1=CC(C)C)N1=O     |             | NCC1=CC=C(N(C)C)C=C1      |            | ClC1=CSC(C(C)=N1)=O        |             | NCCCN1C=CN=C1      |            | OC([C@@H](C)C)O=[S]   |
| 234   | 130124031503260917032803 | 3      |             | NCCOC                 |            | OC(C1=CC(C)C)N1=O     |             | NCC1=CC(F)=CC(C(F)F)F=C1  |            | ClC1=CSC(C(C)=N1)=O        |             | NCCCN1C=CN=C1      |            | OC([C@@H](C)C)O=[S]   |
| 265   | 130124081501260217022803 | 3      |             | N1CCNCC1              |            | OC(C1=CC(C)C)N1=O     |             | NCC1=CC=C(S(=O)(=O)C)C=C1 |            | OC(C1=CC(C)C)N1=O          |             | NCCCN1C=CN=C1      |            | ClC1=CC(C(O)=O)=CC=C1 |
| 271   | 130124081606260317042803 | 3      |             | N1CCNCC1              |            | OC(C1=CC(C)C)N1=O     |             | NCC1=CC=C(C(F)F)F=C1      |            | ClC(C)=C([C@@H](C)C)C(O)=O |             | NCCCN1C=CN=C1      |            | OC([C@@H](C)C)O=[R]   |
| 229   | 130124021502260317032803 | 3      |             | NCC1=CC=C(N)C=C1      |            | OC(C1=CC(C)C)N1=O     |             | NCC1=CC=C(S1)             |            | ClC1=CC(C)C)N1=O           |             | NCCCN1C=CN=C1      |            | OC([C@@H](C)C)O=[S]   |
| 253   | 130124071501260417022803 | 3      |             | NCC1=CC=C(C)C=C1      |            | OC(C1=CC(C)C)N1=O     |             | NCCNC(C)=O                |            | OC(C1=CC=C(C(C)C)C=C1)=O   |             | NCCCN1C=CN=C1      |            | ClC1=CC(C(O)=O)=CC=C1 |
| 256   | 130124071501260817032803 | 3      |             | NCC1=CC=C(C)C=C1      |            | OC(C1=CC(C)C)N1=O     |             | NCC1=CC=C(N(C)C)C=C1      |            | ClC1=CSC(C(C)=N1)=O        |             | NCCCN1C=CN=C1      |            | OC([C@@H](C)C)O=[S]   |
| 273   | 130124091501260617042803 | 3      |             | NCCCN1C=CN=C1         |            | OC(C1=CC(C)C)N1=O     |             | NCC1=CC=CC=C1             |            | OC(C1=CC=C(C(C)C)C=C1)=O   |             | NCCCN1C=CN=C1      |            | OC([C@@H](C)C)O=[R]   |
| 275   | 130124091502260417042803 | 3      |             | NCCCN1C=CN=C1         |            | OC(C1=CC(C)C)N1=O     |             | NCCNC(C)=O                |            | OC(C1=CC=C(C(C)C)C=C1)=O   |             | NCCCN1C=CN=C1      |            | OC([C@@H](C)C)O=[R]   |
| 278   | 130124091503260517032803 | 3      |             | NCCCN1C=CN=C1         |            | OC(C1=CC(C)C)N1=O     |             | NCC(C)C(O)O               |            | OC(C1=CC=C(C(C)C)C=C1)=O   |             | NCCCN1C=CN=C1      |            | OC([C@@H](C)C)O=[S]   |
| 279   | 130124091504260517022803 | 3      |             | NCCCN1C=CN=C1         |            | OC(C1=CC(C)C)N1=O     |             | NCC(C)C(O)O               |            | OC(C1=CC=C(C(C)C)C=C1)=O   |             | NCCCN1C=CN=C1      |            | ClC1=CC(C(O)=O)=CC=C1 |
| 280   | 130124091504260917042803 | 3      |             | NCCCN1C=CN=C1         |            | OC(C1=CC(C)C)N1=O     |             | NCC1=CC(F)=CC(C(F)F)F=C1  |            | ClC1=CSC(C(C)=N1)=O        |             | NCCCN1C=CN=C1      |            | OC([C@@H](C)C)O=[R]   |
| 281   | 130124091509260217032803 | 3      |             | NCCCN1C=CN=C1         |            | OC(C1=CC(C)C)N1=O     |             | NCC1=CC=C(C(F)F)F=C1      |            | ClC(C)=C([C@@H](C)C)O      |             | NCCCN1C=CN=C1      |            | OC([C@@H](C)C)O=[S]   |
| 436   | 131024011504260717042803 | 3      |             | NCC1=CC(F)=C(F)C=C1   |            | OC(C1=CC(C)C)N1=O     |             | NCC1=CC=C(N(C)C)C=C1      |            | ClC1=CSC(C(C)=N1)=O        |             | NCCCN1C=CN=C1      |            | OC([C@@H](C)C)O=[R]   |
| 244   | 130124051502260317022803 | 3      |             | NCC1=CC=C(OCOC2=C2=C1 |            | OC(C1=CC(C)C)N1=O     |             | NCC1=CC=C(S1)             |            | OC(C1=CC(C)C)N1=O          |             | NCCCN1C=CN=C1      |            | ClC1=CC(C(O)=O)=CC=C1 |
| 362   | 130324101503260817022803 | 3      |             | C1CNCCN1              |            | OC(C1=CSC(C(C)=N1)=O  |             | NCC1=CC=CC=C1             |            | OC(C1=CC=C(C(C)C)C=C1)=O   |             | NCCCN1C=CN=C1      |            | ClC1=CC(C(O)=O)=CC=C1 |
| 366   | 130324101509260417042803 | 3      |             | C1CNCCN1              |            | OC(C1=CSC(C(C)=N1)=O  |             | NCC1=CC=C(C(F)F)F=C1      |            | ClC(C)=C([C@@H](C)C)O      |             | NCCCN1C=CN=C1      |            | OC([C@@H](C)C)O=[R]   |
| 354   | 130324061509260417032803 | 3      |             | N1CCNCC1              |            | OC(C1=CC(C)C)N1=O     |             | NCC1=CC=C(C(F)F)F=C1      |            | ClC(C)=C([C@@H](C)C)O      |             | NCCCN1C=CN=C1      |            | OC([C@@H](C)C)O=[S]   |
| 345   | 130324071501260817012803 | 3      |             | NCC1=CC=C(C)C=C1      |            | OC(C1=CSC(C(C)=N1)=O  |             | NCC1=CC=C(N(C)C)C=C1      |            | ClC1=CSC(C(C)=N1)=O        |             | NCCCN1C=CN=C1      |            | ClC1=CSC(C(C)=N1)=O   |
| 348   | 130324071503260817042803 | 3      |             | NCC1=CC=C(C)C=C1      |            | OC(C1=CSC(C(C)=N1)=O  |             | NCC1=CC=C(N(C)C)C=C1      |            | ClC1=CSC(C(C)=N1)=O        |             | NCCCN1C=CN=C1      |            | OC([C@@H](C)C)O=[R]   |
| 428   | 130924031501260817042803 | 3      |             | NCCC1CCOCC1           |            | OC(C1=CSC(C(C)=N1)=O  |             | NCC1=CC=C(N(C)C)C=C1      |            | ClC1=CSC(C(C)=N1)=O        |             | NCCCN1C=CN=C1      |            | OC([C@@H](C)C)O=[R]   |
| 432   | 130924031504260817022803 | 3      |             | NCCC1CCOCC1           |            | OC(C1=CSC(C(C)=N1)=O  |             | NCC1=CC=C(N(C)C)C=C1      |            | ClC1=CSC(C(C)=N1)=O        |             | NCCCN1C=CN=C1      |            | ClC1=CC(C(O)=O)=CC=C1 |



| Entry | Molecular ID             | Copies | Amines (X1) | Amines (X1)- smiles   | Acids (X1) | Acids (X1)- smiles          | Amines (X2) | Amines (X2)- smiles       | Acids (X2) | Acids (X2)- smiles          | Amines (X3) | Amines (X3)- smiles | Acids (X3) | Acids (X3)- smiles      |
|-------|--------------------------|--------|-------------|-----------------------|------------|-----------------------------|-------------|---------------------------|------------|-----------------------------|-------------|---------------------|------------|-------------------------|
| 359   | 130324091503260817022803 | 3      |             | NCCCN1C=CN=C1         |            | OC(C1=CSC(C(=O)N1)=O        |             | N[C@@H](C)C1=CC=CC=C1     |            | OC(C1=CSC(C(=O)N1)=O        |             | NCCCN1C=CN=C1       |            | OC(C1=CSC(C(=O)N1)=O    |
| 442   | 131024031509260817012803 | 3      |             | NCC1=CC(F)=C(F)C=C1   |            | OC(C1=CSC(C(=O)N1)=O        |             | N[C@@H](C)C1=CC=CC=C1     |            | OC(C1=CSC(C(=O)N1)=O        |             | NCCCN1C=CN=C1       |            | OC(C1=CSC(C(=O)N1)=O    |
| 444   | 131024031509260817012803 | 3      |             | NCC1=C(C(F)=C(F)C=C1  |            | OC(C1=CSC(C(=O)N1)=O        |             | NCC1=CC=CC(C(F)(F)F)=C1   |            | OC(C)C=C[C@@H](C)C(=O)O     |             | NCCCN1C=CN=C1       |            | OC(C1=CSC(C(=O)N1)=O    |
| 335   | 130324051503260817022803 | 3      |             | NCC1=CC(C)OC(=O)C2=C1 |            | OC(C1=CSC(C(=O)N1)=O        |             | N[C@@H](C)C1=CC=CC=C1     |            | OC(C1=CSC(C(=O)N1)=O        |             | NCCCN1C=CN=C1       |            | OC([C@@H](C)C)C(=O) [S] |
| 340   | 130324051509260817012803 | 3      |             | NCC1=CC(C)OC(=O)C2=C1 |            | OC(C1=CSC(C(=O)N1)=O        |             | NCC1=CC=CC(C(F)F)=C1      |            | OC(C)C=C[C@@H](C)C(=O)O     |             | NCCCN1C=CN=C1       |            | OC(C1=CSC(C(=O)N1)=O    |
| 416   | 130424101504260817022808 | 3      |             | C1CNCCN1              |            | ClC(C)C=C([C@@H](C)C)C(=O)O |             | NCC1=CC=CC=C1             |            | OC(C1=CC=C(C)C(=O)N1)=O     |             | BrC1=CC=C(C)C=C1    |            | OC(C1=CC(C)C(=O)N1)=O   |
| 396   | 130424081503260917022808 | 3      |             | N1CCNCC1              |            | ClC(C)C=C([C@@H](C)C)C(=O)O |             | NCC1=CC(F)=CC(C(F)F)=C1   |            | OC(C1=CSC(C(=O)N1)=O        |             | BrC1=CC=C(C)C=C1    |            | OC([C@@H](C)C)C(=O) [S] |
| 259   | 130124071502261017022808 | 3      |             | NCC1=CC=C(C)C=C1      |            | OC(C1=COC(C(=O)N1)=O        |             | NCC1=CC=C(C)C=C1          |            | ClC(C)C=C([C@@H](C)C)C(=O)O |             | BrC1=CC=C(C)C=C1    |            | OC(C1=CC(C)C(=O)N1)=O   |
| 246   | 130124051503260417012808 | 3      |             | NCC1=CC(C)OC(=O)C2=C1 |            | OC(C1=COC(C(=O)N1)=O        |             | NCCN(C)=O                 |            | OC(C1=CC=C(C)C(=O)N1)=O     |             | BrC1=CC=C(C)C=C1    |            | OC(C1=CSC(C(=O)N1)=O    |
| 356   | 130324091503260717012808 | 3      |             | NCCCN1C=CN=C1         |            | OC(C1=CSC(C(=O)N1)=O        |             | NCC1=CC(N)C(C)C=C1        |            | OC(C1=CSC(C(=O)N1)=O        |             | BrC1=CC=C(C)C=C1    |            | OC(C1=CSC(C(=O)N1)=O    |
| 412   | 130424101501261017032809 | 3      |             | C1CNCCN1              |            | ClC(C)C=C([C@@H](C)C)C(=O)O |             | NCC1=CC=C(C)C=C1          |            | OC(C)C=C[C@@H](C)C(=O)O     |             | NCC1CCOCC1          |            | OC([C@@H](C)C)C(=O) [S] |
| 413   | 130424101502260217042809 | 3      |             | C1CNCCN1              |            | ClC(C)C=C([C@@H](C)C)C(=O)O |             | NCC1=CC=C(S(=O)(=O)C)C=C1 |            | OC(C1=COC(C(=O)N1)=O        |             | NCC1CCOCC1          |            | OC([C@@H](C)C)C(=O) [R] |
| 369   | 13042401502260817022809  | 3      |             | NCC1=CC=CN=C1         |            | ClC(C)C=C([C@@H](C)C)C(=O)O |             | N[C@@H](C)C1=CC=CC=C1     |            | OC(C1=CSC(C(=O)N1)=O        |             | NCC1CCOCC1          |            | OC(C1=CC(C)C(=O)N1)=O   |
| 394   | 130424071501290517032809 | 3      |             | NCC1=CC=C(C)C=C1      |            | ClC(C)C=C([C@@H](C)C)C(=O)O |             | NCC(C)C(O)                |            | OC(C1=CC=C(C)C(=O)N1)=O     |             | NCC1CCOCC1          |            | OC([C@@H](C)C)C(=O) [S] |
| 391   | 130424051509260317022809 | 3      |             | NCC1=CC(C)OC(=O)C2=C1 |            | ClC(C)C=C([C@@H](C)C)C(=O)O |             | NCC1=CC=CC(C(F)F)=C1      |            | ClC(C)C=C([C@@H](C)C)C(=O)O |             | NCC1CCOCC1          |            | OC(C1=CC(C)C(=O)N1)=O   |
| 321   | 130224101603260217032800 | 3      |             | C1CNCCN1              |            | ClC(C)C=C(C)C(=O)N1=O       |             | NCC1=CC=C(S(=O)(=O)C)C=C1 |            | OC(C1=COC(C(=O)N1)=O        |             | NCC1CCOCC1          |            | OC([C@@H](C)C)C(=O) [S] |
| 322   | 130224101503260717042809 | 3      |             | C1CNCCN1              |            | ClC(C)C=C(C)C(=O)N1=O       |             | NCC1=CC(N)C(C)C=C1        |            | OC(C1=CSC(C(=O)N1)=O        |             | NCC1CCOCC1          |            | OC([C@@H](C)C)C(=O) [R] |
| 291   | 130224031501260417022809 | 3      |             | NCCOCC                |            | ClC(C)C=C(C)C(=O)N1=O       |             | NCCN(C)=O                 |            | OC(C1=CC=C(C)C(=O)N1)=O     |             | NCC1CCOCC1          |            | OC(C1=CC(C)C(=O)N1)=O   |
| 290   | 130224011504260817032809 | 3      |             | NCC1=CC=C(Br)C=C1     |            | ClC(C)C=C(C)C(=O)N1=O       |             | N[C@@H](C)C1=CC=CC=C1     |            | OC(C1=CSC(C(=O)N1)=O        |             | NCC1CCOCC1          |            | OC([C@@H](C)C)C(=O) [S] |
| 315   | 130224091502260217012809 | 3      |             | NCCCN1C=CN=C1         |            | ClC(C)C=C(C)C(=O)N1=O       |             | NCC1=CC=C(S(=O)(=O)C)C=C1 |            | OC(C1=COC(C(=O)N1)=O        |             | NCC1CCOCC1          |            | OC(C1=CSC(C(=O)N1)=O    |
| 304   | 130224051504260317022809 | 3      |             | NCC1=CC(C)OC(=O)C2=C1 |            | ClC(C)C=C(C)C(=O)N1=O       |             | NCC1=CC=CC1               |            | OC(C1=COC(C(=O)N1)=O        |             | NCC1CCOCC1          |            | OC(C1=CC(C)C(=O)N1)=O   |
| 236   | 130124041501261017022809 | 3      |             | NCC=C                 |            | OC(C1=COC(C(=O)N1)=O        |             | NCC1=CC=C(C)C=C1          |            | ClC(C)C=C([C@@H](C)C)C(=O)O |             | NCC1CCOCC1          |            | OC(C1=CC(C)C(=O)N1)=O   |
| 235   | 130124031509260217012809 | 3      |             | NCCOCC                |            | OC(C1=COC(C(=O)N1)=O        |             | NCC1=CC=CC(C(F)F)=C1      |            | ClC(C)C=C[C@@H](C)C(=O)O    |             | NCC1CCOCC1          |            | OC(C1=COC(C(=O)N1)=O    |
| 268   | 130124081502261017022809 | 3      |             | N1CCNCC1              |            | OC(C1=COC(C(=O)N1)=O        |             | NCC1=CC=C(C)C=C1          |            | ClC(C)C=C([C@@H](C)C)C(=O)O |             | NCC1CCOCC1          |            | OC(C1=CSC(C(=O)N1)=O    |
| 269   | 130124081503260517022809 | 3      |             | N1CCNCC1              |            | OC(C1=COC(C(=O)N1)=O        |             | NCC(C)C(O)                |            | OC(C1=CC=C(C)C(=O)N1)=O     |             | NCC1CCOCC1          |            | OC(C1=CC(C)C(=O)N1)=O   |
| 255   | 130124071501260717012809 | 3      |             | NCC1=CC=C(C)C=C1      |            | OC(C1=COC(C(=O)N1)=O        |             | NCC1=CC=C(N)C(C)C=C1      |            | OC(C1=CSC(C(=O)N1)=O        |             | NCC1CCOCC1          |            | OC(C1=CSC(C(=O)N1)=O    |
| 257   | 130124071501260817032809 | 3      |             | NCC1=CC=C(C)C=C1      |            | OC(C1=COC(C(=O)N1)=O        |             | N[C@@H](C)C1=CC=CC=C1     |            | OC(C1=CSC(C(=O)N1)=O        |             | NCC1CCOCC1          |            | OC([C@@H](C)C)C(=O) [S] |
| 274   | 130124091502260317022809 | 3      |             | NCCCN1C=CN=C1         |            | OC(C1=COC(C(=O)N1)=O        |             | NCC1=CC=CC1               |            | OC(C1=COC(C(=O)N1)=O        |             | NCC1CCOCC1          |            | OC(C1=CC(C)C(=O)N1)=O   |
| 277   | 130124091503260917022809 | 3      |             | NCCCN1C=CN=C1         |            | OC(C1=COC(C(=O)N1)=O        |             | NCC1=CC(F)=CC(C(F)F)=C1   |            | OC(C1=CSC(C(=O)N1)=O        |             | NCC1CCOCC1          |            | OC(C1=CC(C)C(=O)N1)=O   |
| 248   | 130124051503261017012809 | 3      |             | NCC1=CC(C)OC(=O)C2=C1 |            | OC(C1=COC(C(=O)N1)=O        |             | NCC1=CC=C(C)C=C1          |            | ClC(C)C=C([C@@H](C)C)C(=O)O |             | NCC1CCOCC1          |            | OC(C1=CSC(C(=O)N1)=O    |
| 249   | 130124051504260817022809 | 3      |             | NCC1=CC(C)OC(=O)C2=C1 |            | OC(C1=COC(C(=O)N1)=O        |             | N[C@@H](C)C1=CC=CC=C1     |            | OC(C1=CSC(C(=O)N1)=O        |             | NCC1CCOCC1          |            | OC([C@@H](C)C)C(=O) [S] |
| 250   | 130124051504260917012809 | 3      |             | NCC1=CC(C)OC(=O)C2=C1 |            | OC(C1=COC(C(=O)N1)=O        |             | NCC1=CC(F)=CC(C(F)F)=C1   |            | OC(C1=CSC(C(=O)N1)=O        |             | NCC1CCOCC1          |            | OC(C1=CSC(C(=O)N1)=O    |
| 331   | 130324041503260617022809 | 3      |             | NCC=C                 |            | OC(C1=CSC(C(=O)N1)=O        |             | NCC1=CC=CC=C1             |            | OC(C1=CC=C(C)C(=O)N1)=O     |             | NCC1CCOCC1          |            | OC(C1=CC(C)C(=O)N1)=O   |
| 334   | 130324051503260717032809 | 3      |             | NCC1=CC(C)OC(=O)C2=C1 |            | OC(C1=CSC(C(=O)N1)=O        |             | NCC1=CC=C(N)C(C)C=C1      |            | OC(C1=CSC(C(=O)N1)=O        |             | NCC1CCOCC1          |            | OC([C@@H](C)C)C(=O) [S] |

| Entry | Molecular ID             | Copies | Amines (X1) | Amines (X1)- smiles   | Acids (X1) | Acids (X1) smiles          | Amines (X2) | Amines (X2) smiles      | Acids (X2) | Acids (X2) smiles          | Amines (X3) | Amines (X3) smiles | Acids (X3) | Acids (X3) smiles       |
|-------|--------------------------|--------|-------------|-----------------------|------------|----------------------------|-------------|-------------------------|------------|----------------------------|-------------|--------------------|------------|-------------------------|
| 411   | 130424101501260817032804 | 3      |             | C1CNCCN1              |            | ClC(C)C=C(C)[C@H](C)C(O)=O |             | N[C@H](C)C1=CC=CC=C1    |            | OC(C)=CSC(C)N1=O           |             | NCC1=CC=C1         |            | OC(C)[C@H](C)C(O)=O [S] |
| 405   | 130424091504260417032804 | 3      |             | NCCCN1C=CN=C1         |            | ClC(C)C=C(C)[C@H](C)C(O)=O |             | NCCNC(C)=O              |            | OC(C)=CC(C)C(C)C=C1=O      |             | NCC1=CC=C1         |            | OC(C)[C@H](C)C(O)=O [S] |
| 421   | 130924021302281017042804 | 3      |             | NCCC1CCOCC1           |            | ClC(C)C=C(C)O=C=C1         |             | NCC1=CC=C(C)C=C1        |            | OC(C)C=C(C)[C@H](C)C(O)=O  |             | NCC1=CC=C1         |            | OC(C)[C@H](C)C(O)=O [R] |
| 239   | 130124041504260417032804 | 3      |             | NCC=C                 |            | OC(C1=CC=C(C)C)N1=O        |             | NCCNC(C)=O              |            | OC(C)=CC(C)C(C)C=C1=O      |             | NCC1=CC=C1         |            | OC(C)[C@H](C)C(O)=O [S] |
| 263   | 130124071504260517032804 | 3      |             | NCC1=CC=C(C)C=C1      |            | OC(C1=CC=C(C)N)N1=O        |             | NCC1=CC=CC=C1           |            | OC(C)=CC=C(C)C(C)C=C1=O    |             | NCC1=CC=C1         |            | ClCC1=CC(C)O=C=CC=C1    |
| 282   | 130124091509260317022804 | 3      |             | NCCCN1C=CN=C1         |            | OC(C1=CC=C(C)N)N1=O        |             | NCC1=CC=C(C)(F)F=C1     |            | ClC(C)C=C(C)[C@H](C)C(O)=O |             | NCC1=CC=C1         |            | ClCC1=CC(C)O=C=CC=C1    |
| 245   | 130124051502260417012804 | 3      |             | NCC1=CC=C(C)OC2=C2=C1 |            | OC(C1=CC=C(C)N)N1=O        |             | NCCNC(C)=O              |            | OC(C)=CC(C)C(C)C=C1=O      |             | NCC1=CC=C1         |            | OC(C1=CSC(C)N)N1=O      |
| 367   | 130324101510260317042804 | 3      |             | C1CNCCN1              |            | OC(C1=CSC(C)N)N1=O         |             | CC(C)CN                 |            | ClC(C)C=C(C)[C@H](C)C(O)=O |             | NCC1=CC=C1         |            | OC(C)[C@H](C)C(O)=O [R] |
| 351   | 130924071510260317032804 | 3      |             | NCC1=CC=C(C)C=C1      |            | OC(C1=CSC(C)N)N1=O         |             | CC(C)CN                 |            | ClC(C)C=C(C)[C@H](C)C(O)=O |             | NCC1=CC=C1         |            | OC(C)[C@H](C)C(O)=O [S] |
| 427   | 130924031501260717022804 | 3      |             | NCCC1CCOCC1           |            | OC(C1=CSC(C)N)N1=O         |             | NCC1=CC=C(N)C(C)C=C1    |            | ClC(C)=CSC(C)N1=O          |             | NCC1=CC=C1         |            | ClCC1=CC(C)O=C=CC=C1    |
| 443   | 131024031504260917022804 | 3      |             | NCC1=CC(F)=C(F)C=C1   |            | OC(C1=CSC(C)N)N1=O         |             | NCC1=CC(F)=C(C)C(F)F=C1 |            | OC(C1=CSC(C)N)N1=O         |             | NCC1=CC=C1         |            | ClCC1=CC(C)O=C=CC=C1    |
| 339   | 130324051509260117032804 | 3      |             | NCC1=CC=C(C)OC2=C2=C1 |            | OC(C1=CSC(C)N)N1=O         |             | NCC1=CC=CC(C)F)F=C1     |            | ClC(C)C=C(C)[C@H](C)C(O)=O |             | NCC1=CC=C1         |            | OC(C)[C@H](C)C(O)=O [S] |
| 418   | 130424101504260817032802 | 3      |             | C1CNCCN1              |            | ClC(C)C=C(C)[C@H](C)C(O)=O |             | N[C@H](C)C1=CC=CC=C1    |            | OC(C1=CSC(C)N)N1=O         |             | NCCO               |            | OC(C)[C@H](C)C(O)=O [S] |
| 375   | 130424031503260617022802 | 3      |             | NCCOCC                |            | ClC(C)C=C(C)[C@H](C)C(O)=O |             | NCC1=CC=CC=C1           |            | OC(C)=CC=C(C)C(C)C=C1=O    |             | NCCO               |            | ClCC1=CC(C)O=C=CC=C1    |
| 376   | 130424031503260717032802 | 3      |             | NCCOCC                |            | ClC(C)C=C(C)[C@H](C)C(O)=O |             | NCC1=CC=C(N)C(C)C=C1    |            | OC(C1=CSC(C)N)N1=O         |             | NCCO               |            | OC(C)[C@H](C)C(O)=O [S] |
| 404   | 130424091502260817032802 | 3      |             | NCCCN1C=CN=C1         |            | ClC(C)C=C(C)[C@H](C)C(O)=O |             | N[C@H](C)C1=CC=CC=C1    |            | OC(C1=CSC(C)N)N1=O         |             | NCCO               |            | OC(C)[C@H](C)C(O)=O [S] |
| 406   | 130424091504260517032802 | 3      |             | NCCCN1C=CN=C1         |            | ClC(C)C=C(C)[C@H](C)C(O)=O |             | NCC(C)C(O)C             |            | ClC(C)=CC(C)C(C)C=C1=O     |             | NCCO               |            | OC(C)[C@H](C)C(O)=O [S] |
| 409   | 130424091510260317032802 | 3      |             | NCCCN1C=CN=C1         |            | ClC(C)C=C(C)[C@H](C)C(O)=O |             | CC(C)CN                 |            | ClC(C)C=C(C)[C@H](C)C(O)=O |             | NCCO               |            | OC(C)[C@H](C)C(O)=O [S] |
| 410   | 130424091510260417032802 | 3      |             | NCCCN1C=CN=C1         |            | ClC(C)C=C(C)[C@H](C)C(O)=O |             | CC(C)CN                 |            | ClC(C)C=C(C)[C@H](C)C(O)=O |             | NCCO               |            | OC(C)[C@H](C)C(O)=O [S] |
| 319   | 130224101501260617032802 | 3      |             | C1CNCCN1              |            | ClCC(C)C(O)=O=C=C1         |             | NCC1=CC=CC=C1           |            | OC(C1=CC=C(C)C)C=C1=O      |             | NCCO               |            | OC(C)[C@H](C)C(O)=O [S] |
| 419   | 130924021502260717032802 | 3      |             | NCCC1CCOCC1           |            | ClCC1=CC(C)O=C=CC=C1       |             | NCC1=CC=C(N)C(C)C=C1    |            | ClC(C)=CSC(C)N1=O          |             | NCCO               |            | OC(C)[C@H](C)C(O)=O [S] |
| 303   | 130224051503260817032802 | 3      |             | NCC1=CC=C(C)OC2=C2=C1 |            | ClCC1=CC(C)O=C=CC=C1       |             | N[C@H](C)C1=CC=CC=C1    |            | OC(C1=CSC(C)N)N1=O         |             | NCCO               |            | OC(C)[C@H](C)C(O)=O [S] |
| 266   | 130124001501260217032802 | 3      |             | N1CCNCC1              |            | OC(C1=CC=C(C)N)N1=O        |             | NCC1=CC=C(S)O(C)C=C1    |            | OC(C1=CC=C(C)N)N1=O        |             | NCCO               |            | OC(C)[C@H](C)C(O)=O [R] |
| 261   | 130124071503260617032802 | 3      |             | NCC1=CC=C(C)C=C1      |            | OC(C1=CC=C(C)N)N1=O        |             | NCC1=CC=CC=C1           |            | OC(C)=CC=C(C)C(C)C=C1=O    |             | NCCO               |            | OC(C)[C@H](C)C(O)=O [S] |
| 262   | 130124071504260517032802 | 3      |             | NCC1=CC=C(C)C=C1      |            | OC(C1=CC=C(C)N)N1=O        |             | NCC(C)C(O)C             |            | OC(C)=CC=C(C)C(C)C=C1=O    |             | NCCO               |            | OC(C)[C@H](C)C(O)=O [S] |
| 242   | 130124051501260317032802 | 3      |             | NCC1=CC=C(C)OC2=C2=C1 |            | OC(C1=CC=C(C)N)N1=O        |             | NCC1=CC=CS1             |            | OC(C1=CC=C(C)N)N1=O        |             | NCCO               |            | OC(C)[C@H](C)C(O)=O [S] |
| 330   | 130324041502260217032802 | 3      |             | NCC=C                 |            | OC(C1=CSC(C)N)N1=O         |             | NCC1=CC=C(S)O(C)C=C1    |            | OC(C1=CC=C(C)N)N1=O        |             | NCCO               |            | OC(C)[C@H](C)C(O)=O [S] |
| 364   | 130324101504260817032802 | 3      |             | C1CNCCN1              |            | OC(C1=CSC(C)N)N1=O         |             | NCC1=CC=CC=C1           |            | OC(C1=CC=C(C)C)C=C1=O      |             | NCCO               |            | OC(C)[C@H](C)C(O)=O [S] |
| 326   | 130324031502260817032802 | 3      |             | NCCOCC                |            | OC(C1=CSC(C)N)N1=O         |             | N[C@H](C)C1=CC=CC=C1    |            | OC(C1=CSC(C)N)N1=O         |             | NCCO               |            | OC(C)[C@H](C)C(O)=O [S] |
| 329   | 130324031504260517032802 | 3      |             | NCCOCC                |            | OC(C1=CSC(C)N)N1=O         |             | NCC(C)C(O)C             |            | OC(C1=CC=C(C)C)C=C1=O      |             | NCCO               |            | OC(C)[C@H](C)C(O)=O [S] |
| 344   | 130324071501260417032802 | 3      |             | NCC1=CC=C(C)C=C1      |            | OC(C1=CSC(C)N)N1=O         |             | NCCNC(C)=O              |            | OC(C1=CC=C(C)C)C=C1=O      |             | NCCO               |            | OC(C)[C@H](C)C(O)=O [S] |
| 346   | 130324071502260317032802 | 3      |             | NCC1=CC=C(C)C=C1      |            | OC(C1=CSC(C)N)N1=O         |             | NCC1=CC=CS1             |            | ClC(C)=CC(C)C(C)N1=O       |             | NCCO               |            | OC(C)[C@H](C)C(O)=O [S] |
| 426   | 130924031501260717022802 | 3      |             | NCCC1CCOCC1           |            | OC(C1=CSC(C)N)N1=O         |             | NCC1=CC=C(N)C(C)C=C1    |            | ClC(C)=CSC(C)N1=O          |             | NCCO               |            | ClCC1=CC(C)O=C=CC=C1    |
| 431   | 130924031504260517032802 | 3      |             | NCCC1CCOCC1           |            | OC(C1=CSC(C)N)N1=O         |             | NCC(C)C(O)C             |            | OC(C1=CC=C(C)C)C=C1=O      |             | NCCO               |            | OC(C)[C@H](C)C(O)=O [S] |

| Entry | Molecular ID             | Copies | Amines (X1) | Amines (X1)- smiles    | Acids (X1) | Acids (X1) smiles          | Amines (X2) | Amines (X2) smiles        | Acids (X2) | Acids (X2) smiles          | Amines (X3) | Amines (X3) smiles         | Acids (X3) | Acids (X3) smiles       |
|-------|--------------------------|--------|-------------|------------------------|------------|----------------------------|-------------|---------------------------|------------|----------------------------|-------------|----------------------------|------------|-------------------------|
| 357   | 130324091503260417032802 | 3      |             | NCCCN1C=CN=C1          |            | OC(C1=CSC(C(=O)N1)=O       |             | NCCN(C)C=O                |            | OC(C1=CC=C(C(=O)C=C1)=O    |             | NCCO                       |            | OC([C@H](C)C)C(=O)O [S] |
| 440   | 131024031501260617032802 | 3      |             | NCC1=CC(F)=C(F)C=C1    |            | OC(C1=CSC(C(=O)N1)=O       |             | NCC1=CC=C(C=C1            |            | OC(C1=CC=C(C(=O)C=C1)=O    |             | NCCO                       |            | OC([C@H](C)C)C(=O)O [S] |
| 441   | 131024031503260717032802 | 3      |             | NCC1=C(F)=C(F)C=C1     |            | OC(C1=CSC(C(=O)N1)=O       |             | NCC1=CC=C(N(C)C)C=C1      |            | OC(C1=CSC(C(=O)N1)=O       |             | NCCO                       |            | OC([C@H](C)C)C(=O)O [S] |
| 445   | 131024031506260317032802 | 3      |             | NCC1=CC(F)=C(F)C=C1    |            | OC(C1=CSC(C(=O)N1)=O       |             | NCC1=CC=C(C(F)F)C=C1      |            | OC(C1=C(C(=O)C)C(=O)C(=O)O |             | NCCO                       |            | OC([C@H](C)C)C(=O)O [S] |
| 337   | 130324051504260517032802 | 3      |             | NCC1=CC=C(OC)C2=C2C=C1 |            | OC(C1=CSC(C(=O)N1)=O       |             | NCC(O)C=O                 |            | OC(C1=CC=C(C(=O)C=C1)=O    |             | NCCO                       |            | OC([C@H](C)C)C(=O)O [S] |
| 341   | 130324051506260217032802 | 3      |             | NCC1=CC=C(OC)C2=C2C=C1 |            | OC(C1=CSC(C(=O)N1)=O       |             | NCC1=CC=C(C(F)F)C=C1      |            | OC(C1=C(C(=O)C)C(=O)C(=O)O |             | NCCO                       |            | OC([C@H](C)C)C(=O)O [S] |
| 904   | 130424031502260217032810 | 2      |             | NCCOCC                 |            | ClC(C)C=C([C@H](C)C)C(=O)O |             | NCC1=CC=C(S(=O)(=O)C)C=C1 |            | OC(C1=CC(C)C(=O)N1)=O      |             | NCC1=CC=C(OC)C(OC)C=C1     |            | OC([C@H](C)C)C(=O)O [S] |
| 950   | 130424071502260517032810 | 2      |             | NCC1=CC=C(C)C=C1       |            | ClC(C)C=C([C@H](C)C)C(=O)O |             | NCC(O)C=O                 |            | OC(C1=CC=C(C)C(=O)C=C1)=O  |             | NCC1=CC=C(OC)C(OC)C=C1     |            | ClC1=CC(C)C(=O)O=CC=C1  |
| 960   | 130424071504260817032810 | 2      |             | NCC1=CC=C(C)C=C1       |            | ClC(C)C=C([C@H](C)C)C(=O)O |             | N[C@H](C)C1=CC=CC=C1      |            | OC(C1=CSC(C(=O)N1)=O       |             | NCC1=CC=C(OC)C(OC)C=C1     |            | ClC1=CC(C)C(=O)O=CC=C1  |
| 964   | 130424091502260417032810 | 2      |             | NCCCN1C=CN=C1          |            | ClC(C)C=C([C@H](C)C)C(=O)O |             | NCCN(C)C=O                |            | OC(C1=CC=C(C)C(=O)C=C1)=O  |             | NCC1=CC=C(C)C(OC)C=C1      |            | OC([C@H](C)C)C(=O)O [S] |
| 985   | 130424091502260517032810 | 2      |             | NCCCN1C=CN=C1          |            | ClC(C)C=C([C@H](C)C)C(=O)O |             | NCC(O)C=O                 |            | OC(C1=CC=C(C)C(=O)C=C1)=O  |             | NCC1=CC=C(OC)C(OC)C=C1     |            | OC([C@H](C)C)C(=O)O [S] |
| 862   | 130224041510260417032810 | 2      |             | NCC=C                  |            | ClC1=CC(C)C(=O)O=CC=C1     |             | CC(C)CCN                  |            | OC(C1=C(C(=O)C)C(=O)C(=O)O |             | NCC1=CC=C(OC)C(OC)C=C1     |            | OC([C@H](C)C)C(=O)O [S] |
| 744   | 130224101502260917032810 | 2      |             | C1NCCNC1               |            | ClC1=CC(C)C(=O)O=CC=C1     |             | NCC1=CC(F)=CC(C(F)F)C=C1  |            | OC(C1=CSC(C(=O)N1)=O       |             | NCC1=CC=C(OC)C(OC)C=C1     |            | OC([C@H](C)C)C(=O)O [S] |
| 638   | 130224031501261017032810 | 2      |             | NCCOCC                 |            | ClC1=CC(C)C(=O)O=CC=C1     |             | NCC1=CC=C(C)C=C1          |            | OC(C1=C(C(=O)C)C(=O)C(=O)O |             | NCC1=CC=C(OC)C(OC)C=C1     |            | ClC1=CC(C)C(=O)O=CC=C1  |
| 643   | 130224031504260417032810 | 2      |             | NCCOCC                 |            | ClC1=CC(C)C(=O)O=CC=C1     |             | NCCN(C)C=O                |            | OC(C1=CC=C(C)C(=O)C=C1)=O  |             | NCC1=CC=C(OC)C(OC)C=C1     |            | ClC1=CC(C)C(=O)O=CC=C1  |
| 710   | 130224081506260317032810 | 2      |             | N1CCNCC1               |            | ClC1=CC(C)C(=O)O=CC=C1     |             | NCC1=CC=C(C(F)F)C=C1      |            | OC(C1=C(C(=O)C)C(=O)C(=O)O |             | NCC1=CC=C(OC)C(OC)C=C1     |            | OC([C@H](C)C)C(=O)O [S] |
| 888   | 130224071501260317032810 | 2      |             | NCC1=CC=C(C)C=C1       |            | ClC1=CC(C)C(=O)O=CC=C1     |             | NCC1=CC=C(S1)             |            | OC(C1=C(C)C(=O)N1)=O       |             | NCC1=CC=C(C)C(OC)C(OC)C=C1 |            | ClC1=CC(C)C(=O)O=CC=C1  |
| 624   | 130224011502260617032810 | 2      |             | NCC1=CC=C(C)C=C1       |            | ClC1=CC(C)C(=O)O=CC=C1     |             | NCC1=CC=C(C)C=C1          |            | OC(C1=CC=C(C)C(=O)C=C1)=O  |             | NCC1=CC=C(OC)C(OC)C=C1     |            | OC([C@H](C)C)C(=O)O [S] |
| 861   | 130224051504261017032810 | 2      |             | NCC1=CC=C(OC)C2=C2C=C1 |            | ClC1=CC(C)C(=O)O=CC=C1     |             | NCC1=CC=C(C)C=C1          |            | OC(C1=C(C(=O)C)C(=O)C(=O)O |             | NCC1=CC=C(OC)C(OC)C=C1     |            | OC([C@H](C)C)C(=O)O [S] |
| 483   | 13012401503260617042810  | 2      |             | NCC=C                  |            | OC(C1=CC(C)C(=O)N1)=O      |             | NCC1=CC=C(C)C=C1          |            | OC(C1=CC=C(C)C(=O)C=C1)=O  |             | NCC1=CC=C(OC)C(OC)C=C1     |            | BrC1=CC=C(C)C(=O)C=C1   |
| 468   | 130124031504260417032810 | 2      |             | NCCOCC                 |            | OC(C1=CC(C)C(=O)N1)=O      |             | NCCN(C)C=O                |            | OC(C1=CC=C(C)C(=O)C=C1)=O  |             | NCC1=CC=C(OC)C(OC)C=C1     |            | ClC1=CC(C)C(=O)O=CC=C1  |
| 517   | 130124071501260317012810 | 2      |             | NCC1=CC=C(C)C=C1       |            | OC(C1=CC(C)C(=O)N1)=O      |             | NCC1=CC=C(S1)             |            | OC(C1=CC(C)C(=O)N1)=O      |             | NCC1=CC=C(OC)C(OC)C=C1     |            | OC(C1=CSC(C(=O)N1)=O    |
| 564   | 130124091501260917032810 | 2      |             | NCCCN1C=CN=C1          |            | OC(C1=CC(C)C(=O)N1)=O      |             | N[C@H](C)C1=CC=CC=C1      |            | OC(C1=CSC(C(=O)N1)=O       |             | NCC1=CC=C(OC)C(OC)C=C1     |            | ClC1=CC(C)C(=O)O=CC=C1  |
| 591   | 130124091502260717032810 | 2      |             | NCCCN1C=CN=C1          |            | OC(C1=CC(C)C(=O)N1)=O      |             | NCC1=CC=C(N(C)C)C=C1      |            | OC(C1=CSC(C(=O)N1)=O       |             | NCC1=CC=C(OC)C(OC)C=C1     |            | OC([C@H](C)C)C(=O)O [S] |
| 564   | 130124091504260417032810 | 2      |             | NCCCN1C=CN=C1          |            | OC(C1=CC(C)C(=O)N1)=O      |             | NCCN(C)C=O                |            | OC(C1=CC=C(C)C(=O)C=C1)=O  |             | NCC1=CC=C(OC)C(OC)C=C1     |            | OC([C@H](C)C)C(=O)O [S] |
| 489   | 130124051501260917032810 | 2      |             | NCC1=CC=C(OC)C2=C2C=C1 |            | OC(C1=CC(C)C(=O)N1)=O      |             | NCC1=CC(F)=CC(C(F)F)C=C1  |            | OC(C1=CSC(C(=O)N1)=O       |             | NCC1=CC=C(OC)C(OC)C=C1     |            | OC([C@H](C)C)C(=O)O [S] |
| 510   | 130124051510260417042810 | 2      |             | NCC1=CC=C(OC)C2=C2C=C1 |            | OC(C1=CC(C)C(=O)N1)=O      |             | CC(C)CCN                  |            | OC(C1=C(C(=O)C)C(=O)C(=O)O |             | NCC1=CC=C(OC)C(OC)C=C1     |            | BrC1=CC=C(C)C(=O)C=C1   |
| 794   | 130324041503260917042810 | 2      |             | NCC=C                  |            | OC(C1=CSC(C(=O)N1)=O       |             | NCC1=CC(F)=CC(C(F)F)C=C1  |            | OC(C1=CSC(C(=O)N1)=O       |             | NCC1=CC=C(OC)C(OC)C=C1     |            | BrC1=CC=C(C)C(=O)C=C1   |
| 823   | 130324071501260717032810 | 2      |             | NCC1=CC=C(C)C=C1       |            | OC(C1=CSC(C(=O)N1)=O       |             | NCC1=CC=C(N(C)C)C=C1      |            | OC(C1=CSC(C(=O)N1)=O       |             | NCC1=CC=C(OC)C(OC)C=C1     |            | OC([C@H](C)C)C(=O)O [S] |
| 1111  | 131024031501260317042810 | 2      |             | NCC1=C(F)=C(F)C=C1     |            | OC(C1=CSC(C(=O)N1)=O       |             | NCC1=CC=C(S1)             |            | OC(C1=CC(C)C(=O)N1)=O      |             | NCC1=CC=C(OC)C(OC)C=C1     |            | BrC1=CC=C(C)C(=O)C=C1   |
| 1120  | 131024031502260417032810 | 2      |             | NCC1=CC(F)=C(F)C=C1    |            | OC(C1=CSC(C(=O)N1)=O       |             | NCCN(C)C=O                |            | OC(C1=CC=C(C)C(=O)C=C1)=O  |             | NCC1=CC=C(OC)C(OC)C=C1     |            | OC([C@H](C)C)C(=O)O [S] |
| 807   | 130324051501260817032810 | 2      |             | NCC1=CC=C(OC)C2=C2C=C1 |            | OC(C1=CSC(C(=O)N1)=O       |             | N[C@H](C)C1=CC=CC=C1      |            | OC(C1=CSC(C(=O)N1)=O       |             | NCC1=CC=C(OC)C(OC)C=C1     |            | OC([C@H](C)C)C(=O)O [S] |
| 923   | 130424041501260317012805 | 2      |             | NCC=C                  |            | ClC(C)C=C([C@H](C)C)C(=O)O |             | NCC1=CC=C(S1)             |            | OC(C1=CC(C)C(=O)N1)=O      |             | NCC1=CC=C(C)C(OC)C(OC)C=C1 |            | OC(C1=CSC(C(=O)N1)=O    |
| 922   | 130424031510260417042805 | 2      |             | NCCOCC                 |            | ClC(C)C=C([C@H](C)C)C(=O)O |             | CC(C)CCN                  |            | OC(C1=C(C(=O)C)C(=O)C(=O)O |             | NCC1=CC=C(C)C(OC)C(OC)C=C1 |            | OC([C@H](C)C)C(=O)O [R] |

Section-10: Analysis of Naive bead population: These beads are deep sequenced after DEL synthesis (upto 2 copies)

| observation | full_mol.code2           | copies | Amines(X1) | Amines(X1):smiles     | Acid(X1) | Acid(X1):smiles        | Amines(X2) | Amines(X2):smiles         | Acid(X2) | Acid(X2):smiles        | Amines(X3) | Amines(X3):smiles        | Structure of Pair... | Pair3Acids            |
|-------------|--------------------------|--------|------------|-----------------------|----------|------------------------|------------|---------------------------|----------|------------------------|------------|--------------------------|----------------------|-----------------------|
| 1           | 130424081501260117032808 | 47     |            | N1CNCCN1              |          | ClC(C)C=C(C)C(O)C(=O)O |            | NCCOC                     |          | OC(C)=COC(C)C(=O)O     |            | BC1=CC=C(C)C(N)C=C1      |                      | OC(C)C(=O)C(=O)O      |
| 2           | 130124071501260717022810 | 44     |            | NCC1=CC=C(C)C=C1      |          | OC(C)C=COC(C)C(=O)O    |            | NCC1=CC=C(C)C=C1          |          | OC(C)=COC(C)C(=O)O     |            | NCC1=CC=C(C)C(O)C=C1     |                      | ClC1=CC(C)C(O)=CC=C1  |
| 3           | 130224031504260517032802 | 37     |            | NCCOC                 |          | ClC1=CC(C)C(O)=CC=C1   |            | NCC(C)C(O)                |          | OC(C)=CC(C)C(=O)O      |            | NCCO                     |                      | OC(C)C(=O)C(=O)O      |
| 4           | 130224101503260317102804 | 37     |            | C1CNCCN1              |          | ClC1=CC(C)C(O)=CC=C1   |            | NCC1=CC=C(S1)             |          | OC(C)=COC(C)C(=O)O     |            | N(C)C@H(C)C1=CC=CC=C1[S] |                      | O=C(O)C1=C(C)C(O)C=C1 |
| 5           | 130324041504260417092804 | 33     |            | NCC=C                 |          | OC(C)=COC(C)C(=O)O     |            | NCCN(C)C(O)               |          | OC(C)=CC(C)C(=O)O      |            | N(C)C@H(C)C1=CC=CC=C1[R] |                      | CCC(O)=O              |
| 6           | 130424071502260917032805 | 31     |            | NCC1=CC=C(C)C=C1      |          | ClC(C)C=C(C)C(O)C(=O)O |            | NCC1=CC(F)=CC(F)F(F)F=C1  |          | OC(C)=COC(C)C(=O)O     |            | NCC1CC(C)C=C(C)C=C2O1    |                      | OC(C)C(=O)C(=O)O      |
| 7           | 130424081502260517032802 | 25     |            | NCC1=CC=CO1           |          | ClC(C)C=C(C)C(O)C(=O)O |            | NCC(C)C(O)                |          | OC(C)=CC(C)C(=O)O      |            | NCCO                     |                      | OC(C)C(=O)C(=O)O      |
| 8           | 131024021502261017022809 | 23     |            | NCC1=CC(F)=C(F)C=C1   |          | ClC1=CC(C)C(O)=CC=C1   |            | NCC1=CC=C(C)C=C1          |          | ClC(C)C=C(C)C(O)C(=O)O |            | NCC1CCOCC1               |                      | ClC1=CC(C)C(O)=CC=C1  |
| 9           | 130224091509260317032803 | 19     |            | NCCN1C=C(N)C=C1       |          | ClC1=CC(C)C(O)=CC=C1   |            | NCC1=CC=C(C)C(F)F(F)F=C1  |          | ClC(C)C=C(C)C(O)C(=O)O |            | NCCN1C=C(N)C=C1          |                      | OC(C)C(=O)C(=O)O      |
| 10          | 130124041509260317022804 | 18     |            | NCC=C                 |          | OC(C)=COC(C)C(=O)O     |            | NCC1=CC=C(C)C(F)F(F)F=C1  |          | ClC(C)C=C(C)C(O)C(=O)O |            | NCC1=CC=CO1              |                      | ClC1=CC(C)C(O)=CC=C1  |
| 11          | 130924031509260217102804 | 18     |            | NCC1=CC=CC=C1         |          | OC(C)=COC(C)C(=O)O     |            | NCC1=CC=C(C)C(F)F(F)F=C1  |          | ClC(C)C=C(C)C(O)C(=O)O |            | N(C)C@H(C)C1=CC=CC=C1[S] |                      | O=C(O)C1=C(C)C(O)C=C1 |
| 12          | 130124071501260417102804 | 17     |            | NCC1=CC=C(C)C=C1      |          | OC(C)=COC(C)C(=O)O     |            | NCCN(C)C(O)               |          | OC(C)=CC(C)C(=O)O      |            | N(C)C@H(C)C1=CC=CC=C1[S] |                      | O=C(O)C1=C(C)C(O)C=C1 |
| 13          | 130224031503260417092804 | 16     |            | NCCOC                 |          | ClC1=CC(C)C(O)=CC=C1   |            | NCCN(C)C(O)               |          | OC(C)=CC(C)C(=O)O      |            | N(C)C@H(C)C1=CC=CC=C1[R] |                      | CCC(O)=O              |
| 14          | 131024021501260417102804 | 14     |            | NCC1=CC(F)=C(F)C=C1   |          | ClC1=CC(C)C(O)=CC=C1   |            | NCCN(C)C(O)               |          | OC(C)=CC(C)C(=O)O      |            | N(C)C@H(C)C1=CC=CC=C1[S] |                      | O=C(O)C1=C(C)C(O)C=C1 |
| 15          | 130124061509260117102804 | 15     |            | NCC1=CC=CO1           |          | OC(C)=COC(C)C(=O)O     |            | NCC1=CC=C(C)C(F)F(F)F=C1  |          | ClC(C)C=C(C)C(O)C(=O)O |            | N(C)C@H(C)C1=CC=CC=C1[S] |                      | O=C(O)C1=C(C)C(O)C=C1 |
| 16          | 130124071510260417032803 | 15     |            | NCC1=CC=C(C)C=C1      |          | OC(C)=COC(C)C(=O)O     |            | CC(C)CCN                  |          | ClC(C)C=C(C)C(O)C(=O)O |            | NCCN1C=C(N)C=C1          |                      | OC(C)C(=O)C(=O)O      |
| 17          | 130124101510260317092804 | 14     |            | C1CNCCN1              |          | ClC1=CC(C)C(O)=CC=C1   |            | CC(C)CCN                  |          | ClC(C)C=C(C)C(O)C(=O)O |            | N(C)C@H(C)C1=CC=CC=C1[R] |                      | CCC(O)=O              |
| 18          | 130224101510260317032803 | 14     |            | C1CNCCN1              |          | ClC1=CC(C)C(O)=CC=C1   |            | CC(C)CCN                  |          | ClC(C)C=C(C)C(O)C(=O)O |            | NCCN1C=C(N)C=C1          |                      | OC(C)C(=O)C(=O)O      |
| 19          | 130224021501260417042806 | 13     |            | NCC1=CC=C(N)C=C1      |          | ClC1=CC(C)C(O)=CC=C1   |            | NCCN(C)C(O)               |          | OC(C)=CC(C)C(=O)O      |            | N(C)C@H(C)C1=CC=CC=C1    |                      | OC(C)C(=O)C(=O)O      |
| 20          | 130124051502260417042803 | 12     |            | NCC1=CC=C(C)C(O)C=C1  |          | OC(C)=COC(C)C(=O)O     |            | NCCN(C)C(O)               |          | OC(C)=CC(C)C(=O)O      |            | NCCN1C=C(N)C=C1          |                      | OC(C)C(=O)C(=O)O      |
| 21          | 130124081502261017042803 | 12     |            | N1CNCCN1              |          | OC(C)=COC(C)C(=O)O     |            | NCC1=CC=C(C)C=C1          |          | ClC(C)C=C(C)C(O)C(=O)O |            | NCCN1C=C(N)C=C1          |                      | OC(C)C(=O)C(=O)O      |
| 22          | 130124081504260417102804 | 12     |            | N1CNCCN1              |          | OC(C)=COC(C)C(=O)O     |            | NCCN(C)C(O)               |          | OC(C)=CC(C)C(=O)O      |            | N(C)C@H(C)C1=CC=CC=C1[S] |                      | O=C(O)C1=C(C)C(O)C=C1 |
| 23          | 130224031510260417092804 | 12     |            | NCCOC                 |          | ClC1=CC(C)C(O)=CC=C1   |            | CC(C)CCN                  |          | ClC(C)C=C(C)C(O)C(=O)O |            | N(C)C@H(C)C1=CC=CC=C1[R] |                      | CCC(O)=O              |
| 24          | 130324101501260417022803 | 12     |            | C1CNCCN1              |          | OC(C)=COC(C)C(=O)O     |            | NCCN(C)C(O)               |          | OC(C)=CC(C)C(=O)O      |            | NCCN1C=C(N)C=C1          |                      | ClC1=CC(C)C(O)=CC=C1  |
| 25          | 130424011503260517032802 | 12     |            | NCC1=CC=C(C)C(Br)C=C1 |          | ClC(C)C=C(C)C(O)C(=O)O |            | NCC(C)C(O)                |          | OC(C)=CC(C)C(=O)O      |            | NCCO                     |                      | OC(C)C(=O)C(=O)O      |
| 26          | 130424031510260317032803 | 12     |            | NCCOC                 |          | ClC(C)C=C(C)C(O)C(=O)O |            | CC(C)CCN                  |          | ClC(C)C=C(C)C(O)C(=O)O |            | NCCN1C=C(N)C=C1          |                      | OC(C)C(=O)C(=O)O      |
| 27          | 130124031504260417032803 | 11     |            | NCCOC                 |          | OC(C)=COC(C)C(=O)O     |            | NCCN(C)C(O)               |          | OC(C)=CC(C)C(=O)O      |            | NCCN1C=C(N)C=C1          |                      | OC(C)C(=O)C(=O)O      |
| 28          | 130424031504260817022803 | 11     |            | NCCOC                 |          | ClC(C)C=C(C)C(O)C(=O)O |            | N(C)C@H(C)C1=CC=CC=C1     |          | OC(C)=COC(C)C(=O)O     |            | NCCN1C=C(N)C=C1          |                      | ClC1=CC(C)C(O)=CC=C1  |
| 29          | 130424031509260317092804 | 11     |            | NCCOC                 |          | ClC(C)C=C(C)C(O)C(=O)O |            | NCC1=CC=C(C)C(F)F(F)F=C1  |          | ClC(C)C=C(C)C(O)C(=O)O |            | N(C)C@H(C)C1=CC=CC=C1[R] |                      | CCC(O)=O              |
| 30          | 131024021501260217012808 | 11     |            | NCC1=CC(F)=C(F)C=C1   |          | ClC1=CC(C)C(O)=CC=C1   |            | NCC1=CC=C(S(=O)(=O)C)C=C1 |          | OC(C)=COC(C)C(=O)O     |            | BC1=CC=C(C)C(N)C=C1      |                      | OC(C)=COC(C)C(=O)O    |
| 31          | 130124051502260417022804 | 10     |            | NCC1=CC=C(C)C(O)C=C1  |          | OC(C)=COC(C)C(=O)O     |            | NCCN(C)C(O)               |          | OC(C)=CC(C)C(=O)O      |            | NCC1=CC=CO1              |                      | ClC1=CC(C)C(O)=CC=C1  |
| 32          | 130124051509260317032807 | 10     |            | NCC1=CC=C(C)C(O)C=C1  |          | OC(C)=COC(C)C(=O)O     |            | NCC1=CC=C(C)C(F)F(F)F=C1  |          | ClC(C)C=C(C)C(O)C(=O)O |            | NCC1=CC(C)C=C(C)C=C1     |                      | OC(C)C(=O)C(=O)O      |
| 33          | 130124071502260417092803 | 10     |            | NCC1=CC=C(C)C=C1      |          | OC(C)=COC(C)C(=O)O     |            | NCCN(C)C(O)               |          | OC(C)=CC(C)C(=O)O      |            | N(C)C@H(C)C1=CC=CC=C1[R] |                      | OC(C)C(=O)C(=O)O      |



| observation | full_mol_code2           | copies | Amines(X1) | Amines(X1):smiles      | Acid(X1) | Acid(X1):smiles         | Amines(X2) | Amines(X2):smiles           | Acid(X2) | Acid(X2):smiles         | Amines(X3) | Amines(X3):smiles        | Structure of Pair... | Pair3Acids          |
|-------------|--------------------------|--------|------------|------------------------|----------|-------------------------|------------|-----------------------------|----------|-------------------------|------------|--------------------------|----------------------|---------------------|
| 34          | 13032403150260217102804  | 10     |            | NCCCC                  |          | OC(C)=CSC(C)=N1=O       |            | NCC1=CC=C(C(F)(F)F)C=C1     |          | ClC(C)=C(C@H)C(C)C(O)=O |            | N[C@@H](C)C1=CC=CC=C1[S] |                      | O=C(O)C1=C(C)OC=C1  |
| 35          | 130324051503260117022803 | 10     |            | NCC1=CC=C(C(=O)OC)C=C1 |          | OC(C)=CSC(C)=N1=O       |            | NCCCC                       |          | OC(C)=C(C(=O)C)=N1=O    |            | NCCCN1C=CN=C1            |                      | ClC1=CC(C)=O=CC=C1  |
| 36          | 13032410150260217022803  | 10     |            | C1CNCCN1               |          | OC(C)=CSC(C)=N1=O       |            | NCC1=CC=C(S(=O)(=O)C)C=C1   |          | OC(C)=C(C(=O)C)=N1=O    |            | NCCCN1C=CN=C1            |                      | ClC1=CC(C)=O=CC=C1  |
| 37          | 130424051504260917022804 | 10     |            | NCC1=CC=C(C(=O)OC)C=C1 |          | ClC(C)=C(C@H)C(C)C(O)=O |            | NCC1=CC(F)=CC(C(F)(F)F)C=C1 |          | OC(C)=CSC(C)=N1=O       |            | NCC1=CC=C01              |                      | ClC1=CC(C)=O=CC=C1  |
| 38          | 130124031502261017092803 | 9      |            | NCCCC                  |          | OC(C)=C(C(=O)C)=N1=O    |            | NCC1=CC=C(C)C=C1            |          | ClC(C)=C(C@H)C(C)C(O)=O |            | N[C@@H](C)C1=CC=CC=C1[R] |                      | OC([C@@H](C)C)=O[S] |
| 39          | 130124091501261017032802 | 9      |            | NCCCN1C=CN=C1          |          | OC(C)=C(C(=O)C)=N1=O    |            | NCC1=CC=C(C)C=C1            |          | ClC(C)=C(C@H)C(C)C(O)=O |            | NCCO                     |                      | OC([C@@H](C)C)=O[S] |
| 40          | 130224101509260117102804 | 9      |            | C1CNCCN1               |          | ClC(C)=CC(C)=O=CC=C1    |            | NCC1=CC=C(C(F)F)C=C1        |          | ClC(C)=C(C@H)C(C)C(O)=O |            | N[C@@H](C)C1=CC=CC=C1[S] |                      | O=C(O)C1=C(C)OC=C1  |
| 41          | 130324101510260317102804 | 9      |            | C1CNCCN1               |          | OC(C)=CSC(C)=N1=O       |            | CC(C)CCN                    |          | ClC(C)=C(C@H)C(C)C(O)=O |            | N[C@@H](C)C1=CC=CC=C1[S] |                      | O=C(O)C1=C(C)OC=C1  |
| 42          | 130424031509260217032803 | 9      |            | NCCCC                  |          | ClC(C)=C(C@H)C(C)C(O)=O |            | NCC1=CC=C(C(F)F)C=C1        |          | ClC(C)=C(C@H)C(C)C(O)=O |            | NCCCN1C=CN=C1            |                      | OC([C@@H](C)C)=O[S] |
| 43          | 130424081505260717032803 | 9      |            | N1CCNCCC1              |          | ClC(C)=C(C@H)C(C)C(O)=O |            | NCC1=CC=C(N(C)C)C=C1        |          | OC(C)=C(C(=O)C)=N1=O    |            | NCCCN1C=CN=C1            |                      | OC([C@@H](C)C)=O[S] |
| 44          | 130924031501260917032804 | 9      |            | NCC1CCOCC1             |          | OC(C)=CSC(C)=N1=O       |            | NCC1=CC(F)=CC(C(F)F)C=C1    |          | OC(C)=CSC(C)=N1=O       |            | NCC1=CC=C01              |                      | OC([C@@H](C)C)=O[S] |
| 45          | 130924031504260417092804 | 9      |            | NCC1CCOCC1             |          | OC(C)=CSC(C)=N1=O       |            | NCCNC(C)=O                  |          | OC(C)=CC(C)C=C1=O       |            | N[C@@H](C)C1=CC=CC=C1[R] |                      | CC(C)=O             |
| 46          | 130124031503260417092804 | 8      |            | NCCCC                  |          | OC(C)=C(C(=O)C)=N1=O    |            | NCCNC(C)=O                  |          | OC(C)=CC(C)C=C1=O       |            | N[C@@H](C)C1=CC=CC=C1[R] |                      | CC(C)=O             |
| 47          | 130124031504260817032809 | 8      |            | NCCCC                  |          | OC(C)=C(C(=O)C)=N1=O    |            | N[C@@H](C)C1=CC=CC=C1       |          | OC(C)=C(C(=O)C)=N1=O    |            | NCC1CCOCC1               |                      | OC([C@@H](C)C)=O[S] |
| 48          | 130124051501261017102804 | 8      |            | NCC1=CC=C(C(=O)OC)C=C1 |          | OC(C)=C(C(=O)C)=N1=O    |            | NCC1=CC=C(C)C=C1            |          | ClC(C)=C(C@H)C(C)C(O)=O |            | N[C@@H](C)C1=CC=CC=C1[S] |                      | O=C(O)C1=C(C)OC=C1  |
| 49          | 130124051503260417092804 | 8      |            | NCC1=CC=C(C(=O)OC)C=C1 |          | OC(C)=C(C(=O)C)=N1=O    |            | NCC1=CC=C(C)C=C1            |          | OC(C)=CC(C)C=C1=O       |            | N[C@@H](C)C1=CC=CC=C1[R] |                      | CC(C)=O             |
| 50          | 130124051509260317022803 | 8      |            | NCC1=CC=C(C(=O)OC)C=C1 |          | OC(C)=C(C(=O)C)=N1=O    |            | NCC1=CC=C(C(F)F)C=C1        |          | ClC(C)=C(C@H)C(C)C(O)=O |            | NCCCN1C=CN=C1            |                      | ClC1=CC(C)=O=CC=C1  |
| 51          | 130224031502260817022802 | 8      |            | NCCCC                  |          | ClC(C)=CC(C)=O=CC=C1    |            | N[C@@H](C)C1=CC=CC=C1       |          | OC(C)=C(C(=O)C)=N1=O    |            | NCCO                     |                      | ClC1=CC(C)=O=CC=C1  |
| 52          | 130224041504260717022803 | 8      |            | NCC=C                  |          | ClCC1=CC(C)=O=CC=C1     |            | NCC1=CC=C(N(C)C)C=C1        |          | OC(C)=C(C(=O)C)=N1=O    |            | NCCCN1C=CN=C1            |                      | ClC1=CC(C)=O=CC=C1  |
| 53          | 130324071501260517102804 | 8      |            | NCC1=CC=C(C)C=C1       |          | OC(C)=CSC(C)=N1=O       |            | NCC(C)C(O)                  |          | OC(C)=CC(C)C=C1=O       |            | N[C@@H](C)C1=CC=CC=C1[S] |                      | O=C(O)C1=C(C)OC=C1  |
| 54          | 130424031504260517032802 | 8      |            | NCCCC                  |          | ClC(C)=C(C@H)C(C)C(O)=O |            | NCC(C)C(O)                  |          | OC(C)=CC(C)C=C1=O       |            | NCCO                     |                      | OC([C@@H](C)C)=O[S] |
| 55          | 130424031504260917032803 | 8      |            | NCCCC                  |          | ClC(C)=C(C@H)C(C)C(O)=O |            | NCC1=CC=C(C)C=C1            |          | OC(C)=CC(C)C=C1=O       |            | NCCCN1C=CN=C1            |                      | OC([C@@H](C)C)=O[S] |
| 56          | 130424031504260917022809 | 8      |            | NCCCC                  |          | ClC(C)=C(C@H)C(C)C(O)=O |            | NCC1=CC(F)=CC(C(F)F)C=C1    |          | OC(C)=C(C(=O)C)=N1=O    |            | NCC1CCOCC1               |                      | ClC1=CC(C)=O=CC=C1  |
| 57          | 130424051502260417032803 | 8      |            | NCC1=CC=C(C(=O)OC)C=C1 |          | ClC(C)=C(C@H)C(C)C(O)=O |            | NCCNC(C)=O                  |          | OC(C)=CC(C)C=C1=O       |            | NCCCN1C=CN=C1            |                      | OC([C@@H](C)C)=O[S] |
| 58          | 130424071502260217022803 | 8      |            | NCC1=CC=C(C)C=C1       |          | ClC(C)=C(C@H)C(C)C(O)=O |            | NCC1=CC=C(S(=O)(=O)C)C=C1   |          | OC(C)=C(C(=O)C)=N1=O    |            | NCCCN1C=CN=C1            |                      | ClC1=CC(C)=O=CC=C1  |
| 59          | 130424081509260317102804 | 8      |            | N1CCNCCC1              |          | ClC(C)=C(C@H)C(C)C(O)=O |            | NCC1=CC=C(C)C=C1            |          | ClC(C)=C(C@H)C(C)C(O)=O |            | N[C@@H](C)C1=CC=CC=C1[S] |                      | O=C(O)C1=C(C)OC=C1  |
| 60          | 130424091504260917022803 | 8      |            | NCCCN1C=CN=C1          |          | ClC(C)=C(C@H)C(C)C(O)=O |            | NCC1=CC=C(C)C=C1            |          | OC(C)=CC(C)C=C1=O       |            | NCCCN1C=CN=C1            |                      | ClC1=CC(C)=O=CC=C1  |
| 61          | 130424101501260817032809 | 8      |            | C1CNCCN1               |          | ClC(C)=C(C@H)C(C)C(O)=O |            | NCC1=CC=C(C)C=C1            |          | OC(C)=CC(C)C=C1=O       |            | NCC1CCOCC1               |                      | OC([C@@H](C)C)=O[S] |
| 62          | 130124031502260217032803 | 7      |            | NCCCC                  |          | OC(C)=C(C(=O)C)=N1=O    |            | NCC1=CC=C(S(=O)(=O)C)C=C1   |          | OC(C)=C(C(=O)C)=N1=O    |            | NCCCN1C=CN=C1            |                      | OC([C@@H](C)C)=O[S] |
| 63          | 130124071502260517092804 | 7      |            | NCC1=CC=C(C)C=C1       |          | OC(C)=C(C(=O)C)=N1=O    |            | NCC1=CC=C(C)C=C1            |          | OC(C)=CC(C)C=C1=O       |            | N[C@@H](C)C1=CC=CC=C1[R] |                      | CC(C)=O             |
| 64          | 130324051504260817032803 | 7      |            | NCC1=CC=C(C(=O)OC)C=C1 |          | OC(C)=CSC(C)=N1=O       |            | N[C@@H](C)C1=CC=CC=C1       |          | OC(C)=CSC(C)=N1=O       |            | NCCCN1C=CN=C1            |                      | OC([C@@H](C)C)=O[S] |
| 65          | 130424031501261017022803 | 7      |            | NCCCC                  |          | ClC(C)=C(C@H)C(C)C(O)=O |            | NCC1=CC=C(C)C=C1            |          | ClC(C)=C(C@H)C(C)C(O)=O |            | NCCCN1C=CN=C1            |                      | ClC1=CC(C)=O=CC=C1  |
| 66          | 130424071502260317032805 | 7      |            | NCC1=CC=C(C)C=C1       |          | ClC(C)=C(C@H)C(C)C(O)=O |            | NCC1=CC=C(S1)C=C1           |          | OC(C)=C(C(=O)C)=N1=O    |            | NCC1CCO(C=CC=C2)C2O1     |                      | OC([C@@H](C)C)=O[S] |

| observation | full_mol_code2           | copies | Amines(X1) | Amines(X1):smiles      | Acid(X1) | Acid(X1):smiles        | Amines(X2) | Amines(X2):smiles         | Acid(X2) | Acid(X2):smiles        | Amines(X3) | Amines(X3):smiles       | Structure of Pair... | Pair3Acids            |
|-------------|--------------------------|--------|------------|------------------------|----------|------------------------|------------|---------------------------|----------|------------------------|------------|-------------------------|----------------------|-----------------------|
| 67          | 130424071502260417032803 | 7      |            | NCC1=CC=C(C)C=C1       |          | ClC(C)C(=O)C(Cl)C(O)=O |            | NCC1=CC=C(C)C=C1          |          | ClC(C)C(=O)C(Cl)C(O)=O |            | NCCCN1C=CN=C1           |                      | OC(Cl)C(O)C(=O)O [S]  |
| 68          | 130424081502260317032803 | 7      |            | NCCCN1C=CN=C1          |          | ClC(C)C(=O)C(Cl)C(O)=O |            | NCC1=CC=C(S1)C=C1         |          | OC(C1=CC(C)C(=O)N1)=O  |            | NCCCN1C=CN=C1           |                      | OC(Cl)C(O)C(=O)O [S]  |
| 69          | 130924031501260717042803 | 7      |            | NCC1CCOCC1             |          | ClC(C)C(=O)C(Cl)C(O)=O |            | NCC1=CC=C(N(C)C)C=C1      |          | OC(C1=C(C)C(C)N1)=O    |            | NCCCN1C=CN=C1           |                      | OC(Cl)C(O)C(=O)O [R]  |
| 70          | 130924041501260417092804 | 7      |            | NCC1CCOCC1             |          | ClC(C)C(=O)C(Cl)C(O)=O |            | NCCNC(C)=O                |          | OC(C1=CC=C(C)C)C(=O)O  |            | N(C)C(O)C1=CC=CC=C1 [R] |                      | CCC(O)=O              |
| 71          | 131024021503260417102804 | 7      |            | NCC1=CC(F)=C(F)C=C1    |          | ClC(C)C(=O)C(Cl)C(O)=O |            | NCCNC(C)=O                |          | OC(C1=CC=C(C)C)C(=O)O  |            | N(C)C(O)C1=CC=CC=C1 [S] |                      | O=C(O)C1=C(C)OC=C1    |
| 72          | 130124031502261017032803 | 6      |            | NCCOCC                 |          | ClC(C)C(=O)C(Cl)C(O)=O |            | NCC1=CC=C(C)C=C1          |          | ClC(C)C(=O)C(Cl)C(O)=O |            | NCCCN1C=CN=C1           |                      | OC(Cl)C(O)C(=O)O [S]  |
| 73          | 130124041501261017022803 | 6      |            | NCC=C                  |          | ClC(C)C(=O)C(Cl)C(O)=O |            | NCC1=CC=C(C)C=C1          |          | ClC(C)C(=O)C(Cl)C(O)=O |            | NCCCN1C=CN=C1           |                      | ClC(C)C(=O)C(O)=CC=C1 |
| 74          | 130124051502260317032803 | 6      |            | NCC1=CC=C(OC(=O)C)C=C1 |          | ClC(C)C(=O)C(Cl)C(O)=O |            | CC(C)CCN                  |          | ClC(C)C(=O)C(Cl)C(O)=O |            | NCCCN1C=CN=C1           |                      | OC(Cl)C(O)C(=O)O [S]  |
| 75          | 130124071502260317092804 | 6      |            | NCC1=CC=C(C)C=C1       |          | ClC(C)C(=O)C(Cl)C(O)=O |            | NCC1=CC=C(S1)C=C1         |          | OC(C1=CC(C)C(=O)N1)=O  |            | N(C)C(O)C1=CC=CC=C1 [R] |                      | CCC(O)=O              |
| 76          | 130124071504260517102804 | 6      |            | NCC1=CC=C(C)C=C1       |          | ClC(C)C(=O)C(Cl)C(O)=O |            | NCC1=CC=C(S(=O)(=O)C)C=C1 |          | OC(C1=CC(C)C(=O)N1)=O  |            | N(C)C(O)C1=CC=CC=C1 [S] |                      | O=C(O)C1=C(C)OC=C1    |
| 77          | 130224041501260517102804 | 6      |            | NCC=C                  |          | ClC(C)C(=O)C(Cl)C(O)=O |            | NCC(C)C(O)O               |          | OC(C1=CC=C(C)C)C(=O)O  |            | N(C)C(O)C1=CC=CC=C1 [S] |                      | O=C(O)C1=C(C)OC=C1    |
| 78          | 130224081502260717032803 | 6      |            | N1CCNCC1               |          | ClC(C)C(=O)C(Cl)C(O)=O |            | NCC1=CC=C(N(C)C)C=C1      |          | OC(C1=C(C)C(C)N1)=O    |            | NCCCN1C=CN=C1           |                      | OC(Cl)C(O)C(=O)O [S]  |
| 79          | 130224081503260417102804 | 6      |            | N1CCNCC1               |          | ClC(C)C(=O)C(Cl)C(O)=O |            | NCCNC(C)=O                |          | OC(C1=CC=C(C)C)C(=O)O  |            | N(C)C(O)C1=CC=CC=C1 [S] |                      | O=C(O)C1=C(C)OC=C1    |
| 80          | 130324041502260417042803 | 6      |            | NCC=C                  |          | ClC(C)C(=O)C(Cl)C(O)=O |            | NCCNC(C)=O                |          | OC(C1=CC=C(C)C)C(=O)O  |            | NCCCN1C=CN=C1           |                      | OC(Cl)C(O)C(=O)O [R]  |
| 81          | 130324061503260417092804 | 6      |            | NCC1=CC=C(O1)C=C1      |          | ClC(C)C(=O)C(Cl)C(O)=O |            | NCCNC(C)=O                |          | OC(C1=CC=C(C)C)C(=O)O  |            | N(C)C(O)C1=CC=CC=C1 [R] |                      | CCC(O)=O              |
| 82          | 130324081509260217102804 | 6      |            | N1CCNCC1               |          | ClC(C)C(=O)C(Cl)C(O)=O |            | NCC1=CC=C(C)C=C1          |          | ClC(C)C(=O)C(Cl)C(O)=O |            | N(C)C(O)C1=CC=CC=C1 [S] |                      | O=C(O)C1=C(C)OC=C1    |
| 83          | 130424031502260217032803 | 6      |            | NCCOCC                 |          | ClC(C)C(=O)C(Cl)C(O)=O |            | NCC1=CC=C(S(=O)(=O)C)C=C1 |          | OC(C1=CC(C)C(=O)N1)=O  |            | NCCCN1C=CN=C1           |                      | OC(Cl)C(O)C(=O)O [S]  |
| 84          | 130424031503260517092804 | 6      |            | NCCOCC                 |          | ClC(C)C(=O)C(Cl)C(O)=O |            | NCC(C)C(O)O               |          | OC(C1=CC=C(C)C)C(=O)O  |            | N(C)C(O)C1=CC=CC=C1 [R] |                      | CCC(O)=O              |
| 85          | 130424051509260217092804 | 6      |            | NCC1=CC=C(OC(=O)C)C=C1 |          | ClC(C)C(=O)C(Cl)C(O)=O |            | NCC1=CC=C(C)C=C1          |          | ClC(C)C(=O)C(Cl)C(O)=O |            | N(C)C(O)C1=CC=CC=C1 [R] |                      | CCC(O)=O              |
| 86          | 130424101509260217022804 | 6      |            | C1CCNCC1               |          | ClC(C)C(=O)C(Cl)C(O)=O |            | NCC1=CC=C(C)C=C1          |          | ClC(C)C(=O)C(Cl)C(O)=O |            | NCC1=CC=C(O1)C=C1       |                      | ClC(C)C(=O)C(O)=CC=C1 |
| 87          | 130924021501260317032803 | 6      |            | NCC1CCOCC1             |          | ClC(C)C(=O)C(Cl)C(O)=O |            | NCC1=CC=C(S1)C=C1         |          | OC(C1=CC(C)C(=O)N1)=O  |            | NCCCN1C=CN=C1           |                      | OC(Cl)C(O)C(=O)O [S]  |
| 88          | 130924031502261017102804 | 6      |            | NCC1CCOCC1             |          | ClC(C)C(=O)C(Cl)C(O)=O |            | NCC1=CC=C(C)C=C1          |          | ClC(C)C(=O)C(Cl)C(O)=O |            | N(C)C(O)C1=CC=CC=C1 [S] |                      | O=C(O)C1=C(C)OC=C1    |
| 89          | 130924031503261017032803 | 6      |            | NCC1CCOCC1             |          | ClC(C)C(=O)C(Cl)C(O)=O |            | NCC1=CC=C(C)C=C1          |          | ClC(C)C(=O)C(Cl)C(O)=O |            | NCCCN1C=CN=C1           |                      | OC(Cl)C(O)C(=O)O [S]  |
| 90          | 131024011504260617042809 | 6      |            | NCC1=CC(F)=C(F)C=C1    |          | ClC(C)C(=O)C(Cl)C(O)=O |            | NCC1=CC=C(O)C=C1          |          | OC(C1=CC=C(C)C)C(=O)O  |            | NCC1CCOCC1              |                      | OC(Cl)C(O)C(=O)O [R]  |
| 91          | 131024031504260517032802 | 6      |            | NCC1=CC(F)=C(F)C=C1    |          | ClC(C)C(=O)C(Cl)C(O)=O |            | NCC(C)C(O)O               |          | OC(C1=CC=C(C)C)C(=O)O  |            | NCCO                    |                      | OC(Cl)C(O)C(=O)O [S]  |
| 92          | 130124051503261017042803 | 5      |            | NCC1=CC=C(OC(=O)C)C=C1 |          | ClC(C)C(=O)C(Cl)C(O)=O |            | NCC1=CC=C(C)C=C1          |          | ClC(C)C(=O)C(Cl)C(O)=O |            | NCCCN1C=CN=C1           |                      | OC(Cl)C(O)C(=O)O [R]  |
| 93          | 130124051509260117012803 | 5      |            | NCC1=CC=C(OC(=O)C)C=C1 |          | ClC(C)C(=O)C(Cl)C(O)=O |            | NCC1=CC=C(C)C=C1          |          | ClC(C)C(=O)C(Cl)C(O)=O |            | NCCCN1C=CN=C1           |                      | OC(C1=C(C)C(C)N1)=O   |
| 94          | 130124051509260417032803 | 5      |            | NCC1=CC=C(OC(=O)C)C=C1 |          | ClC(C)C(=O)C(Cl)C(O)=O |            | NCC1=CC=C(C)C=C1          |          | ClC(C)C(=O)C(Cl)C(O)=O |            | NCCCN1C=CN=C1           |                      | OC(Cl)C(O)C(=O)O [S]  |
| 95          | 130124071501260417032803 | 5      |            | NCC1=CC=C(C)C=C1       |          | ClC(C)C(=O)C(Cl)C(O)=O |            | NCCNC(C)=O                |          | OC(C1=CC=C(C)C)C(=O)O  |            | NCCCN1C=CN=C1           |                      | OC(Cl)C(O)C(=O)O [S]  |
| 96          | 130124071501260517022803 | 5      |            | NCC1=CC=C(C)C=C1       |          | ClC(C)C(=O)C(Cl)C(O)=O |            | NCC1=CC=C(O)C=C1          |          | OC(C1=CC=C(C)C)C(=O)O  |            | NCCCN1C=CN=C1           |                      | ClC(C)C(=O)C(O)=CC=C1 |
| 97          | 130124071501260817032804 | 5      |            | NCC1=CC=C(C)C=C1       |          | ClC(C)C(=O)C(Cl)C(O)=O |            | N(C)C(O)C1=CC=CC=C1       |          | OC(C1=C(C)C(C)N1)=O    |            | NCC1=CC=C(O1)C=C1       |                      | OC(Cl)C(O)C(=O)O [S]  |
| 98          | 130124071501261017042803 | 5      |            | NCC1=CC=C(C)C=C1       |          | ClC(C)C(=O)C(Cl)C(O)=O |            | NCC1=CC=C(C)C=C1          |          | ClC(C)C(=O)C(Cl)C(O)=O |            | NCCCN1C=CN=C1           |                      | OC(Cl)C(O)C(=O)O [R]  |
| 99          | 130124071504260417102804 | 5      |            | NCC1=CC=C(C)C=C1       |          | ClC(C)C(=O)C(Cl)C(O)=O |            | NCCNC(C)=O                |          | OC(C1=CC=C(C)C)C(=O)O  |            | N(C)C(O)C1=CC=CC=C1 [S] |                      | O=C(O)C1=C(C)OC=C1    |

| observation | full_mol_code2           | copies | Amines(X1) | Amines(X1):smiles | Acid(X1) | Acid(X1):smiles       | Amines(X2) | Amines(X2):smiles   | Acid(X2) | Acid(X2):smiles       | Amines(X3) | Amines(X3):smiles   | Structure of Pair... | Pair3Acids         |
|-------------|--------------------------|--------|------------|-------------------|----------|-----------------------|------------|---------------------|----------|-----------------------|------------|---------------------|----------------------|--------------------|
| 100         | 130124071502260117022809 | 5      |            | NCC1=CC=C(C)C=C1  |          | OC(=O)C(=O)C(C)C(=O)O |            | NCC1=CC=C(C)C=C1    |          | ClC(C)C=C(C)C(=O)O    |            | NCC1=CC=C(C)C=C1    |                      | ClC(=O)C(C)C(=O)O  |
| 101         | 130124071502260117022803 | 5      |            | NCC1=CC=C(C)C=C1  |          | OC(=O)C(=O)C(C)C(=O)O |            | NCC1=CC=C(C)C=C1    |          | ClC(C)C=C(C)C(=O)O    |            | NCCN1C=CN=C1        |                      | ClC(=O)C(C)C(=O)O  |
| 102         | 130124081502260417022809 | 5      |            | N1CCNCC1          |          | OC(=O)C(=O)C(C)C(=O)O |            | NCCN1C=CN=C1        |          | OC(=O)C(=O)C(C)C(=O)O |            | NCC1=CC=C(C)C=C1    |                      | ClC(=O)C(C)C(=O)O  |
| 103         | 130124091502260117022803 | 5      |            | NCCN1C=CN=C1      |          | OC(=O)C(=O)C(C)C(=O)O |            | NCC1=CC=C(C)C=C1    |          | OC(=O)C(=O)C(C)C(=O)O |            | NCCN1C=CN=C1        |                      | ClC(=O)C(C)C(=O)O  |
| 104         | 130124091502260117032803 | 5      |            | NCCN1C=CN=C1      |          | OC(=O)C(=O)C(C)C(=O)O |            | NCC1=CC=C(C)C=C1    |          | OC(=O)C(=O)C(C)C(=O)O |            | NCCN1C=CN=C1        |                      | ClC(=O)C(C)C(=O)O  |
| 105         | 130124091502260217022809 | 5      |            | NCCN1C=CN=C1      |          | OC(=O)C(=O)C(C)C(=O)O |            | NCC1=CC=C(C)C=C1    |          | OC(=O)C(=O)C(C)C(=O)O |            | NCC1=CC=C(C)C=C1    |                      | ClC(=O)C(C)C(=O)O  |
| 106         | 130124101502260417042803 | 5      |            | C1CNCC1           |          | OC(=O)C(=O)C(C)C(=O)O |            | NCCN1C=CN=C1        |          | OC(=O)C(=O)C(C)C(=O)O |            | NCCN1C=CN=C1        |                      | OC(=O)C(C)C(=O)O   |
| 107         | 130124101503260417022803 | 5      |            | C1CNCC1           |          | OC(=O)C(=O)C(C)C(=O)O |            | NCCN1C=CN=C1        |          | OC(=O)C(=O)C(C)C(=O)O |            | NCCN1C=CN=C1        |                      | ClC(=O)C(C)C(=O)O  |
| 108         | 130224031502260717012803 | 5      |            | NCCOOC            |          | ClC(=O)C(C)C(=O)O     |            | NCC1=CC=C(C)C=C1    |          | OC(=O)C(=O)C(C)C(=O)O |            | NCCN1C=CN=C1        |                      | OC(=O)C(C)C(=O)O   |
| 109         | 130224031502260717032803 | 5      |            | NCCOOC            |          | ClC(=O)C(C)C(=O)O     |            | NCC1=CC=C(C)C=C1    |          | OC(=O)C(=O)C(C)C(=O)O |            | NCCN1C=CN=C1        |                      | OC(=O)C(C)C(=O)O   |
| 110         | 130224081510260317102804 | 5      |            | N1CCNCC1          |          | ClC(=O)C(C)C(=O)O     |            | CC(C)CN             |          | ClC(C)C=C(C)C(=O)O    |            | N1C@H(C)C1=CC=CC=C1 |                      | O=C(O)C1=C(C)OC=C1 |
| 111         | 13022409150226071702804  | 5      |            | NCCN1C=CN=C1      |          | ClC(=O)C(C)C(=O)O     |            | NCC1=CC=C(C)C=C1    |          | OC(=O)C(=O)C(C)C(=O)O |            | N1C@H(C)C1=CC=CC=C1 |                      | O=C(O)C1=C(C)OC=C1 |
| 112         | 13022410150260117012803  | 5      |            | C1CNCC1           |          | ClC(=O)C(C)C(=O)O     |            | NCC1=CC=C(C)C=C1    |          | OC(=O)C(=O)C(C)C(=O)O |            | NCCN1C=CN=C1        |                      | OC(=O)C(C)C(=O)O   |
| 113         | 13022410150226101702804  | 5      |            | C1CNCC1           |          | ClC(=O)C(C)C(=O)O     |            | NCC1=CC=C(C)C=C1    |          | ClC(C)C=C(C)C(=O)O    |            | N1C@H(C)C1=CC=CC=C1 |                      | CC(O)C=O           |
| 114         | 13022410150260317032803  | 5      |            | C1CNCC1           |          | ClC(=O)C(C)C(=O)O     |            | NCC1=CC=C(C)C=C1    |          | OC(=O)C(=O)C(C)C(=O)O |            | NCCN1C=CN=C1        |                      | OC(=O)C(C)C(=O)O   |
| 115         | 130324031502260417022803 | 5      |            | NCCOOC            |          | ClC(=O)C(C)C(=O)O     |            | NCCN1C=CN=C1        |          | OC(=O)C(=O)C(C)C(=O)O |            | NCCN1C=CN=C1        |                      | ClC(=O)C(C)C(=O)O  |
| 116         | 130324041502260317022804 | 5      |            | NCC=C             |          | ClC(=O)C(C)C(=O)O     |            | NCC1=CC=C(C)C=C1    |          | OC(=O)C(=O)C(C)C(=O)O |            | NCC1=CC=C(C)C=C1    |                      | ClC(=O)C(C)C(=O)O  |
| 117         | 130324051502261017042803 | 5      |            | NCC1=CC=C(C)C=C1  |          | ClC(=O)C(C)C(=O)O     |            | NCC1=CC=C(C)C=C1    |          | ClC(C)C=C(C)C(=O)O    |            | NCCN1C=CN=C1        |                      | OC(=O)C(C)C(=O)O   |
| 118         | 130324051502260817012803 | 5      |            | NCC1=CC=C(C)C=C1  |          | ClC(=O)C(C)C(=O)O     |            | N1C@H(C)C1=CC=CC=C1 |          | OC(=O)C(=O)C(C)C(=O)O |            | NCCN1C=CN=C1        |                      | ClC(=O)C(C)C(=O)O  |
| 119         | 130324051502260417042803 | 5      |            | NCC1=CC=C(C)C=C1  |          | ClC(=O)C(C)C(=O)O     |            | NCC1=CC=C(C)C=C1    |          | ClC(C)C=C(C)C(=O)O    |            | NCCN1C=CN=C1        |                      | OC(=O)C(C)C(=O)O   |
| 120         | 130324071503261017022803 | 5      |            | NCC1=CC=C(C)C=C1  |          | ClC(=O)C(C)C(=O)O     |            | NCC1=CC=C(C)C=C1    |          | ClC(C)C=C(C)C(=O)O    |            | NCCN1C=CN=C1        |                      | ClC(=O)C(C)C(=O)O  |
| 121         | 130324081510260317032803 | 5      |            | NCCN1C=CN=C1      |          | ClC(=O)C(C)C(=O)O     |            | CC(C)CN             |          | ClC(C)C=C(C)C(=O)O    |            | NCCN1C=CN=C1        |                      | OC(=O)C(C)C(=O)O   |
| 122         | 130324101502260417032801 | 5      |            | C1CNCC1           |          | ClC(=O)C(C)C(=O)O     |            | NCCN1C=CN=C1        |          | OC(=O)C(=O)C(C)C(=O)O |            | NCC1=CC=C(C)C=C1    |                      | OC(=O)C(C)C(=O)O   |
| 123         | 130324101503260417022803 | 5      |            | C1CNCC1           |          | ClC(=O)C(C)C(=O)O     |            | NCCN1C=CN=C1        |          | OC(=O)C(=O)C(C)C(=O)O |            | NCCN1C=CN=C1        |                      | ClC(=O)C(C)C(=O)O  |
| 124         | 130424031502260317032809 | 5      |            | NCCOOC            |          | ClC(=O)C(C)C(=O)O     |            | NCC1=CC=C(C)C=C1    |          | OC(=O)C(=O)C(C)C(=O)O |            | NCC1=CC=C(C)C=C1    |                      | OC(=O)C(C)C(=O)O   |
| 125         | 130424031502260417022805 | 5      |            | NCCOOC            |          | ClC(=O)C(C)C(=O)O     |            | NCCN1C=CN=C1        |          | OC(=O)C(=O)C(C)C(=O)O |            | NCC1=CC=C(C)C=C1    |                      | ClC(=O)C(C)C(=O)O  |
| 126         | 130424031502260417102803 | 5      |            | NCCOOC            |          | ClC(=O)C(C)C(=O)O     |            | NCCN1C=CN=C1        |          | OC(=O)C(=O)C(C)C(=O)O |            | N1C@H(C)C1=CC=CC=C1 |                      | OC(=O)C(C)C(=O)O   |
| 127         | 130424031502260817032809 | 5      |            | NCCOOC            |          | ClC(=O)C(C)C(=O)O     |            | NCC1=CC=C(C)C=C1    |          | OC(=O)C(=O)C(C)C(=O)O |            | NCC1=CC=C(C)C=C1    |                      | OC(=O)C(C)C(=O)O   |
| 128         | 130424051504261017102804 | 5      |            | NCC1=CC=C(C)C=C1  |          | ClC(=O)C(C)C(=O)O     |            | NCC1=CC=C(C)C=C1    |          | ClC(C)C=C(C)C(=O)O    |            | N1C@H(C)C1=CC=CC=C1 |                      | O=C(O)C1=C(C)OC=C1 |
| 129         | 130424091502260217032802 | 5      |            | NCCN1C=CN=C1      |          | ClC(=O)C(C)C(=O)O     |            | NCC1=CC=C(C)C=C1    |          | OC(=O)C(=O)C(C)C(=O)O |            | NCCO                |                      | OC(=O)C(C)C(=O)O   |
| 130         | 130424091502260817032803 | 5      |            | NCCN1C=CN=C1      |          | ClC(=O)C(C)C(=O)O     |            | N1C@H(C)C1=CC=CC=C1 |          | OC(=O)C(=O)C(C)C(=O)O |            | NCCN1C=CN=C1        |                      | OC(=O)C(C)C(=O)O   |
| 131         | 130424101504260317032803 | 5      |            | C1CNCC1           |          | ClC(=O)C(C)C(=O)O     |            | NCC1=CC=C(C)C=C1    |          | OC(=O)C(=O)C(C)C(=O)O |            | NCCN1C=CN=C1        |                      | OC(=O)C(C)C(=O)O   |
| 132         | 130924021509260417022803 | 5      |            | NCC1=CC=C(C)C=C1  |          | ClC(=O)C(C)C(=O)O     |            | NCC1=CC=C(C)C=C1    |          | ClC(C)C=C(C)C(=O)O    |            | NCCN1C=CN=C1        |                      | ClC(=O)C(C)C(=O)O  |

| observation | full_mol_code2           | copies | Amines(X1) | Amines(X1):smiles   | Acid(X1) | Acid(X1):smiles      | Amines(X2) | Amines(X2):smiles | Acid(X2) | Acid(X2):smiles      | Amines(X3) | Amines(X3):smiles    | Structure of Pair... | Pair3Acids            |
|-------------|--------------------------|--------|------------|---------------------|----------|----------------------|------------|-------------------|----------|----------------------|------------|----------------------|----------------------|-----------------------|
| 133         | 130924031501260217032809 | 5      |            | NCC1COCC1           |          | OC(C)=CSC(C)=N1=O    |            | NCC1=CC=C(C)C=C1  |          | OC(C)=CSC(C)=N1=O    |            | NCC1COCC1            |                      | OC(C)=CSC(C)=N1=O [S] |
| 134         | 131024021501261017102804 | 5      |            | NCC1=CC(F)=C(F)C=C1 |          | ClC(C)=C(C)(O)=CC=C1 |            | NCC1=CC=C(C)C=C1  |          | ClC(C)=C(C)(O)=CC=C1 |            | NCC1=CC=C(C)C=C1 [S] |                      | OC(C)=C(C)(O)=CC=C1   |
| 135         | 131024021502260517102804 | 5      |            | NCC1=CC(F)=C(F)C=C1 |          | ClC(C)=C(C)(O)=CC=C1 |            | NCC1=CC=C(C)C=C1  |          | ClC(C)=C(C)(O)=CC=C1 |            | NCC1=CC=C(C)C=C1 [S] |                      | OC(C)=C(C)(O)=CC=C1   |
| 136         | 130124021509260317102804 | 4      |            | NCC1=CC=C(N)C=C1    |          | OC(C)=CSC(C)=N1=O    |            | NCC1=CC=C(C)C=C1  |          | OC(C)=CSC(C)=N1=O    |            | NCC1=CC=C(C)C=C1 [S] |                      | OC(C)=C(C)(O)=CC=C1   |
| 137         | 130124031504260517032802 | 4      |            | NCCOC               |          | OC(C)=CSC(C)=N1=O    |            | NCC(C)C(O)        |          | OC(C)=CSC(C)=N1=O    |            | NCCOC                |                      | OC(C)=CSC(C)=N1=O [S] |
| 138         | 130124031509260171032810 | 4      |            | NCCOC               |          | OC(C)=CSC(C)=N1=O    |            | NCC1=CC=C(C)C=C1  |          | OC(C)=CSC(C)=N1=O    |            | NCC1=CC=C(C)C=C1 [S] |                      | OC(C)=CSC(C)=N1=O [S] |
| 139         | 130124041502260417032803 | 4      |            | NCC=C               |          | OC(C)=CSC(C)=N1=O    |            | NCCN(C)C=O        |          | OC(C)=CSC(C)=N1=O    |            | NCCCN1C=C(N)C=C1     |                      | OC(C)=CSC(C)=N1=O [S] |
| 140         | 130124041502260517032802 | 4      |            | NCC=C               |          | OC(C)=CSC(C)=N1=O    |            | NCC(C)C(O)        |          | OC(C)=CSC(C)=N1=O    |            | NCCOC                |                      | OC(C)=CSC(C)=N1=O [S] |
| 141         | 130124041510260217032803 | 4      |            | NCC=C               |          | OC(C)=CSC(C)=N1=O    |            | CC(C)CCN          |          | OC(C)=CSC(C)=N1=O    |            | NCCCN1C=C(N)C=C1     |                      | OC(C)=CSC(C)=N1=O [S] |
| 142         | 130124051501260417032801 | 4      |            | NCC1=CC=C(C)C=C1    |          | OC(C)=CSC(C)=N1=O    |            | NCCN(C)C=O        |          | OC(C)=CSC(C)=N1=O    |            | NCCCN1C=C(N)C=C1     |                      | OC(C)=CSC(C)=N1=O [S] |
| 143         | 130124051501260817032804 | 4      |            | NCC1=CC=C(C)C=C1    |          | OC(C)=CSC(C)=N1=O    |            | NCC(C)C(O)        |          | OC(C)=CSC(C)=N1=O    |            | NCC1=CC=C(C)C=C1     |                      | OC(C)=CSC(C)=N1=O [S] |
| 144         | 130124051502260417032803 | 4      |            | NCC1=CC=C(C)C=C1    |          | OC(C)=CSC(C)=N1=O    |            | NCCN(C)C=O        |          | OC(C)=CSC(C)=N1=O    |            | NCCCN1C=C(N)C=C1     |                      | OC(C)=CSC(C)=N1=O [S] |
| 145         | 130124051502260517102804 | 4      |            | NCC1=CC=C(C)C=C1    |          | OC(C)=CSC(C)=N1=O    |            | NCC(C)C(O)        |          | OC(C)=CSC(C)=N1=O    |            | NCC1=CC=C(C)C=C1 [S] |                      | OC(C)=CSC(C)=N1=O [S] |
| 146         | 130124051502260817042809 | 4      |            | NCC1=CC=C(C)C=C1    |          | OC(C)=CSC(C)=N1=O    |            | NCC(C)C(O)        |          | OC(C)=CSC(C)=N1=O    |            | NCC1COCC1            |                      | OC(C)=CSC(C)=N1=O [R] |
| 147         | 13012405150326017022802  | 4      |            | NCC1=CC=C(C)C=C1    |          | OC(C)=CSC(C)=N1=O    |            | NCC(C)C(O)        |          | OC(C)=CSC(C)=N1=O    |            | NCCOC                |                      | OC(C)=CSC(C)=N1=O [S] |
| 148         | 130124051504260317042803 | 4      |            | NCC1=CC=C(C)C=C1    |          | OC(C)=CSC(C)=N1=O    |            | NCC1=CC=C(C)C=C1  |          | OC(C)=CSC(C)=N1=O    |            | NCCCN1C=C(N)C=C1     |                      | OC(C)=CSC(C)=N1=O [R] |
| 149         | 130124051504260517032802 | 4      |            | NCC1=CC=C(C)C=C1    |          | OC(C)=CSC(C)=N1=O    |            | NCC(C)C(O)        |          | OC(C)=CSC(C)=N1=O    |            | NCC(C)C(O)           |                      | OC(C)=CSC(C)=N1=O [S] |
| 150         | 130124051504260817032804 | 4      |            | NCC1=CC=C(C)C=C1    |          | OC(C)=CSC(C)=N1=O    |            | NCC(C)C(O)        |          | OC(C)=CSC(C)=N1=O    |            | NCC1=CC=C(C)C=C1 [S] |                      | OC(C)=CSC(C)=N1=O [S] |
| 151         | 130124051509260217022803 | 4      |            | NCC1=CC=C(C)C=C1    |          | OC(C)=CSC(C)=N1=O    |            | NCC1=CC=C(C)C=C1  |          | OC(C)=CSC(C)=N1=O    |            | NCCCN1C=C(N)C=C1     |                      | ClC(C)=C(C)(O)=CC=C1  |
| 152         | 130124071501260817042803 | 4      |            | NCC1=CC=C(C)C=C1    |          | OC(C)=CSC(C)=N1=O    |            | NCC(C)C(O)        |          | OC(C)=CSC(C)=N1=O    |            | NCCCN1C=C(N)C=C1     |                      | OC(C)=CSC(C)=N1=O [R] |
| 153         | 130124071501261017032804 | 4      |            | NCC1=CC=C(C)C=C1    |          | OC(C)=CSC(C)=N1=O    |            | NCC1=CC=C(C)C=C1  |          | OC(C)=CSC(C)=N1=O    |            | NCC1=CC=C(C)C=C1 [S] |                      | OC(C)=CSC(C)=N1=O [S] |
| 154         | 130124071502260317032803 | 4      |            | NCC1=CC=C(C)C=C1    |          | OC(C)=CSC(C)=N1=O    |            | NCC1=CC=C(C)C=C1  |          | OC(C)=CSC(C)=N1=O    |            | NCCCN1C=C(N)C=C1     |                      | OC(C)=CSC(C)=N1=O [S] |
| 155         | 13012407150326017032803  | 4      |            | NCC1=CC=C(C)C=C1    |          | OC(C)=CSC(C)=N1=O    |            | NCC1=CC=C(C)C=C1  |          | OC(C)=CSC(C)=N1=O    |            | NCCCN1C=C(N)C=C1     |                      | OC(C)=CSC(C)=N1=O [S] |
| 156         | 130124071503260171012803 | 4      |            | NCC1=CC=C(C)C=C1    |          | OC(C)=CSC(C)=N1=O    |            | NCC1=CC=C(C)C=C1  |          | OC(C)=CSC(C)=N1=O    |            | NCCCN1C=C(N)C=C1     |                      | OC(C)=CSC(C)=N1=O     |
| 157         | 130124071504260817022803 | 4      |            | NCC1=CC=C(C)C=C1    |          | OC(C)=CSC(C)=N1=O    |            | NCC1=CC=C(C)C=C1  |          | OC(C)=CSC(C)=N1=O    |            | NCCCN1C=C(N)C=C1     |                      | ClC(C)=C(C)(O)=CC=C1  |
| 158         | 130124071504260917042803 | 4      |            | NCC1=CC=C(C)C=C1    |          | OC(C)=CSC(C)=N1=O    |            | NCC1=CC=C(C)C=C1  |          | OC(C)=CSC(C)=N1=O    |            | NCCCN1C=C(N)C=C1     |                      | OC(C)=CSC(C)=N1=O [R] |
| 159         | 13012407150926017102804  | 4      |            | NCC1=CC=C(C)C=C1    |          | OC(C)=CSC(C)=N1=O    |            | NCC1=CC=C(C)C=C1  |          | OC(C)=CSC(C)=N1=O    |            | NCC1=CC=C(C)C=C1 [S] |                      | OC(C)=CSC(C)=N1=O [S] |
| 160         | 130124081502260217012803 | 4      |            | N1CCNCC1            |          | OC(C)=CSC(C)=N1=O    |            | NCC1=CC=C(C)C=C1  |          | OC(C)=CSC(C)=N1=O    |            | NCCCN1C=C(N)C=C1     |                      | OC(C)=CSC(C)=N1=O     |
| 161         | 130124081502261017012810 | 4      |            | N1CCNCC1            |          | OC(C)=CSC(C)=N1=O    |            | NCC1=CC=C(C)C=C1  |          | OC(C)=CSC(C)=N1=O    |            | NCC1=CC=C(C)C=C1 [S] |                      | OC(C)=CSC(C)=N1=O     |
| 162         | 13012408150926017102804  | 4      |            | N1CCNCC1            |          | OC(C)=CSC(C)=N1=O    |            | NCC1=CC=C(C)C=C1  |          | OC(C)=CSC(C)=N1=O    |            | NCC1=CC=C(C)C=C1 [S] |                      | OC(C)=CSC(C)=N1=O     |
| 163         | 130124091502260917032804 | 4      |            | NCCCN1C=C(N)C=C1    |          | OC(C)=CSC(C)=N1=O    |            | NCC1=CC=C(C)C=C1  |          | OC(C)=CSC(C)=N1=O    |            | NCC1=CC=C(C)C=C1     |                      | OC(C)=CSC(C)=N1=O [S] |
| 164         | 130124091503260517092804 | 4      |            | NCCCN1C=C(N)C=C1    |          | OC(C)=CSC(C)=N1=O    |            | NCC1=CC=C(C)C=C1  |          | OC(C)=CSC(C)=N1=O    |            | NCC1=CC=C(C)C=C1 [R] |                      | CC(C)=O               |
| 165         | 130224031501260417032804 | 4      |            | NCCOC               |          | ClC(C)=C(C)(O)=CC=C1 |            | NCCN(C)C=O        |          | ClC(C)=C(C)(O)=CC=C1 |            | NCC1=CC=C(C)C=C1     |                      | OC(C)=CSC(C)=N1=O [S] |

| observation | full_mol_code2           | copies | Amines(X1) | Amines(X1):smiles    | Acid(X1) | Acid(X1):smiles        | Amines(X2) | Amines(X2):smiles        | Acid(X2) | Acid(X2):smiles             | Amines(X3) | Amines(X3):smiles         | Structure of Pair... | Pair3Acids             |
|-------------|--------------------------|--------|------------|----------------------|----------|------------------------|------------|--------------------------|----------|-----------------------------|------------|---------------------------|----------------------|------------------------|
| 166         | 130224031502260717012809 | 4      |            | NCCCC                |          | ClCC1=CC(C(O)=O)=CC=C1 |            | NCC1=CC=C(N(C)C)C=C1     |          | OC(C1=CSC(CCl)=N)=O         |            | NCC1CCCC1                 |                      | OC(C1=CSC(CCl)=N)=O    |
| 167         | 130224031504260917032803 | 4      |            | NCCCC                |          | ClCC1=CC(C(O)=O)=CC=C1 |            | NCC1=CC=CC=C1            |          | OC(C1=CC=C(CCl)=N)=O        |            | NCCCN1C=CN=C1             |                      | OC([C@H](C)Cl)=O [S]   |
| 168         | 130224051501260217022803 | 4      |            | NCC1=CC=C(OCCO2)C=C1 |          | ClCC1=CC(C(O)=O)=CC=C1 |            | NCC1=CC=C(S(=O)(O)C)O=C1 |          | OC(C1=CC=C(CCl)=N)=O        |            | NCCCN1C=CN=C1             |                      | ClCC1=CC(C(O)=O)=CC=C1 |
| 169         | 130224051501260417102801 | 4      |            | NCC1=CC=C(OCCO2)C=C1 |          | ClCC1=CC(C(O)=O)=CC=C1 |            | NCCN(C)=O                |          | OC(C1=CC=C(CCl)=N)=O        |            | N[C@@H](C)C1=CC=CC=C1 [S] |                      | OC(C1=CSC(CCl)=N)=O    |
| 170         | 130224071501260217032801 | 4      |            | NCC1=CC=C(C)C=C1     |          | ClCC1=CC(C(O)=O)=CC=C1 |            | NCC1=CC=C(S(=O)(O)C)O=C1 |          | OC(C1=CC=C(CCl)=N)=O        |            | NCCCN1C=CN=C21            |                      | OC([C@H](C)Cl)=O [S]   |
| 171         | 130224071501260817042803 | 4      |            | NCC1=CC=C(C)C=C1     |          | ClCC1=CC(C(O)=O)=CC=C1 |            | NCC1=CC=CC=C1            |          | OC(C1=CC=C(CCl)=N)=O        |            | NCCCN1C=CN=C1             |                      | OC([C@H](C)Br)=O [R]   |
| 172         | 130224071502260317042803 | 4      |            | NCC1=CC=C(C)C=C1     |          | ClCC1=CC(C(O)=O)=CC=C1 |            | NCC1=CC=CS1              |          | OC(C1=CC=C(CCl)=N)=O        |            | NCCCN1C=CN=C1             |                      | OC([C@H](C)Br)=O [R]   |
| 173         | 130224071503260317032809 | 4      |            | NCC1=CC=C(C)C=C1     |          | ClCC1=CC(C(O)=O)=CC=C1 |            | NCC1=CC=CS1              |          | OC(C1=CC=C(CCl)=N)=O        |            | NCC1CCCC1                 |                      | OC([C@H](C)Cl)=O [S]   |
| 174         | 130224071509260417102803 | 4      |            | NCC1=CC=C(C)C=C1     |          | ClCC1=CC(C(O)=O)=CC=C1 |            | NCC1=CC=C(C(F)F)C=C1     |          | ClC(C)C=C([C@@H](C)C)C(O)=O |            | N[C@@H](C)C1=CC=CC=C1 [S] |                      | OC([C@H](C)Cl)=O [S]   |
| 175         | 130224081504260317032803 | 4      |            | N1CCNCCC1            |          | ClCC1=CC(C(O)=O)=CC=C1 |            | NCC1=CC=CS1              |          | OC(C1=CC=C(CCl)=N)=O        |            | NCCCN1C=CN=C1             |                      | OC([C@H](C)Cl)=O [S]   |
| 176         | 130224081502260417102804 | 4      |            | N1CCNCCC1            |          | ClCC1=CC(C(O)=O)=CC=C1 |            | CC(C)CCN                 |          | ClC(C)C=C([C@@H](C)C)C(O)=O |            | N[C@@H](C)C1=CC=CC=C1 [S] |                      | O=C(O)C1=C(C)OC=C1     |
| 177         | 130224091504260417092804 | 4      |            | NCCCN1C=CN=C1        |          | ClCC1=CC(C(O)=O)=CC=C1 |            | NCCN(C)=O                |          | OC(C1=CC=C(CCl)=N)=O        |            | N[C@@H](C)C1=CC=CC=C1 [R] |                      | CCC(O)=O               |
| 178         | 130224091504260817012803 | 4      |            | NCCCN1C=CN=C1        |          | ClCC1=CC(C(O)=O)=CC=C1 |            | N[C@@H](C)C1=CC=CC=C1    |          | OC(C1=CSC(CCl)=N)=O         |            | NCCCN1C=CN=C1             |                      | OC(C1=CSC(CCl)=N)=O    |
| 179         | 130224091509260317032804 | 4      |            | NCCCN1C=CN=C1        |          | ClCC1=CC(C(O)=O)=CC=C1 |            | NCC1=CC=C(C(F)F)C=C1     |          | ClC(C)C=C([C@@H](C)C)C(O)=O |            | NCC1=CC=CC=C1             |                      | OC([C@H](C)Cl)=O [S]   |
| 180         | 130224091510260317022803 | 4      |            | NCCCN1C=CN=C1        |          | ClCC1=CC(C(O)=O)=CC=C1 |            | CC(C)CCN                 |          | ClC(C)C=C([C@@H](C)C)C(O)=O |            | NCCCN1C=CN=C1             |                      | ClCC1=CC(C(O)=O)=CC=C1 |
| 181         | 130224101501260417022810 | 4      |            | C1CNCCN1             |          | ClCC1=CC(C(O)=O)=CC=C1 |            | NCCN(C)=O                |          | OC(C1=CC=C(CCl)=N)=O        |            | NCCCN1C=CC(O)C=C1         |                      | ClCC1=CC(C(O)=O)=CC=C1 |
| 182         | 130224101501260717092804 | 4      |            | C1CNCCN1             |          | ClCC1=CC(C(O)=O)=CC=C1 |            | NCC1=CC=C(NC)C=C1        |          | OC(C1=CSC(CCl)=N)=O         |            | N[C@@H](C)C1=CC=CC=C1 [R] |                      | CCC(O)=O               |
| 183         | 130224101502260417092802 | 4      |            | C1CNCCN1             |          | ClCC1=CC(C(O)=O)=CC=C1 |            | NCCN(C)=O                |          | OC(C1=CC=C(CCl)=N)=O        |            | N[C@@H](C)C1=CC=CC=C1 [R] |                      | ClCC1=CC(C(O)=O)=CC=C1 |
| 184         | 130224101502260517102804 | 4      |            | C1CNCCN1             |          | ClCC1=CC(C(O)=O)=CC=C1 |            | NCC(C)C(O)               |          | OC(C1=CC=C(CCl)=N)=O        |            | N[C@@H](C)C1=CC=CC=C1 [S] |                      | O=C(O)C1=C(C)OC=C1     |
| 185         | 130224101503260517102804 | 4      |            | C1CNCCN1             |          | ClCC1=CC(C(O)=O)=CC=C1 |            | NCC(C)C(O)               |          | OC(C1=CC=C(CCl)=N)=O        |            | N[C@@H](C)C1=CC=CC=C1 [S] |                      | O=C(O)C1=C(C)OC=C1     |
| 186         | 130224101503261017102804 | 4      |            | C1CNCCN1             |          | ClCC1=CC(C(O)=O)=CC=C1 |            | NCC1=CC=C(C)C=C1         |          | ClC(C)C=C([C@@H](C)C)C(O)=O |            | N[C@@H](C)C1=CC=CC=C1 [S] |                      | O=C(O)C1=C(C)OC=C1     |
| 187         | 130224101504260817032805 | 4      |            | C1CNCCN1             |          | ClCC1=CC(C(O)=O)=CC=C1 |            | N[C@@H](C)C1=CC=CC=C1    |          | OC(C1=CSC(CCl)=N)=O         |            | NCC1CCCC1                 |                      | OC([C@H](C)Cl)=O [S]   |
| 188         | 130224101509260817032801 | 4      |            | C1CNCCN1             |          | ClCC1=CC(C(O)=O)=CC=C1 |            | NCC1=CC=C(C(F)F)C=C1     |          | ClC(C)C=C([C@@H](C)C)C(O)=O |            | NCCCN1C=CC(O)C=C21        |                      | OC([C@H](C)Cl)=O [S]   |
| 189         | 130224101510260417022803 | 4      |            | C1CNCCN1             |          | ClCC1=CC(C(O)=O)=CC=C1 |            | CC(C)CCN                 |          | ClC(C)C=C([C@@H](C)C)C(O)=O |            | NCCCN1C=CN=C1             |                      | ClCC1=CC(C(O)=O)=CC=C1 |
| 190         | 130224101510260417032803 | 4      |            | C1CNCCN1             |          | ClCC1=CC(C(O)=O)=CC=C1 |            | CC(C)CCN                 |          | ClC(C)C=C([C@@H](C)C)C(O)=O |            | NCCCN1C=CN=C1             |                      | OC([C@H](C)Cl)=O [S]   |
| 191         | 130324031501260417102803 | 4      |            | NCCCC                |          | ClCC1=CC(C(O)=O)=CC=C1 |            | NCCN(C)=O                |          | OC(C1=CC=C(CCl)=N)=O        |            | N[C@@H](C)C1=CC=CC=C1 [S] |                      | OC([C@H](C)Cl)=O [S]   |
| 192         | 130324031501260717032803 | 4      |            | NCCCC                |          | ClCC1=CC(C(O)=O)=CC=C1 |            | NCC1=CC=C(N(C)C)C=C1     |          | OC(C1=CSC(CCl)=N)=O         |            | NCCCN1C=CN=C1             |                      | OC([C@H](C)Cl)=O [S]   |
| 193         | 130324031509260417032803 | 4      |            | NCCCC                |          | ClCC1=CC(C(O)=O)=CC=C1 |            | NCC1=CC=C(C(F)F)C=C1     |          | ClC(C)C=C([C@@H](C)C)C(O)=O |            | NCCCN1C=CN=C1             |                      | OC([C@H](C)Cl)=O [S]   |
| 194         | 130324041502260217032803 | 4      |            | NCC=C                |          | ClCC1=CC(C(O)=O)=CC=C1 |            | NCC1=CC=C(S(=O)(O)C)O=C1 |          | OC(C1=CC=C(CCl)=N)=O        |            | NCCCN1C=CN=C1             |                      | OC([C@H](C)Cl)=O [S]   |
| 195         | 130324051501260417032806 | 4      |            | NCC1=CC=C(OCCO2)C=C1 |          | ClCC1=CC(C(O)=O)=CC=C1 |            | NCCN(C)=O                |          | OC(C1=CC=C(CCl)=N)=O        |            | N[C@@H](C)C1=CC=CC=C1     |                      | OC([C@H](C)Cl)=O [S]   |
| 196         | 130324051509260117032803 | 4      |            | NCC1=CC=C(OCCO2)C=C1 |          | ClCC1=CC(C(O)=O)=CC=C1 |            | NCC1=CC=C(C(F)F)C=C1     |          | ClC(C)C=C([C@@H](C)C)C(O)=O |            | NCCCN1C=CN=C1             |                      | OC([C@H](C)Cl)=O [S]   |
| 197         | 130324051510260417032809 | 4      |            | NCC1=CC=C(OCCO2)C=C1 |          | ClCC1=CC(C(O)=O)=CC=C1 |            | CC(C)CCN                 |          | ClC(C)C=C([C@@H](C)C)C(O)=O |            | NCC1CCCC1                 |                      | OC([C@H](C)Cl)=O [S]   |
| 198         | 130324071504260517032802 | 4      |            | NCC1=CC=C(C)C=C1     |          | ClCC1=CC(C(O)=O)=CC=C1 |            | NCC(C)C(O)               |          | OC(C1=CC=C(CCl)=N)=O        |            | NCCO                      |                      | OC([C@H](C)Cl)=O [S]   |



| observation | full_mol_code2           | copies | Amines(X1) | Amines(X1):smiles   | Acid(X1) | Acid(X1):smiles             | Amines(X2) | Amines(X2):smiles         | Acid(X2) | Acid(X2):smiles             | Amines(X3) | Amines(X3):smiles          | Structure of Pair... | Pair3Acids             |
|-------------|--------------------------|--------|------------|---------------------|----------|-----------------------------|------------|---------------------------|----------|-----------------------------|------------|----------------------------|----------------------|------------------------|
| 199         | 130324081502260817022803 | 4      |            | N1CCNCCC1           |          | OC(C1=CSC(C(=O)N1)=O        |            | NCC1=CC=C(C=C1)           |          | OC(C1=CC=C(C(=O)C=C1)=O     |            | NCCCN1C=CN=C1              |                      | ClCC1=CC(C(=O)O)=CC=C1 |
| 200         | 130324081502260817022804 | 4      |            | N1CCNCCC1           |          | OC(C1=CSC(C(=O)N1)=O        |            | NCC1=CC=C(C(=O)F)F=C1     |          | ClC(C1=C=C(C(=O)C=C1)=O     |            | N[C@@H](C)C1=CC=CC=C1[R]   |                      | CC(O)=O                |
| 201         | 130324091504260217032803 | 4      |            | NCCCN1C=CN=C1       |          | OC(C1=CSC(C(=O)N1)=O        |            | NCC1=CC=C(S(=O)(=O)C)C=C1 |          | OC(C1=CSC(C(=O)N1)=O        |            | NCCCN1C=CN=C1              |                      | OC([C@@H](C)O)=O [S]   |
| 202         | 130324101502260817102804 | 4      |            | C1CNCCN1            |          | OC(C1=CSC(C(=O)N1)=O        |            | NCCN(C)C=O                |          | OC(C1=CC=C(C(=O)C=C1)=O     |            | N[C@@H](C)C1=CC=CC=C1[S]   |                      | O=C(O)C1=C(C)OC=C1     |
| 203         | 130324101504261017032803 | 4      |            | C1CNCCN1            |          | OC(C1=CSC(C(=O)N1)=O        |            | NCC1=CC=C(C)C=C1          |          | ClC(C1=C=C(C(=O)C=C1)=O     |            | NCCCN1C=CN=C1              |                      | OC([C@@H](C)O)=O [S]   |
| 205         | 130424031502260817012809 | 4      |            | NCCOC               |          | ClC(C)C=C([C@@H](C)O)C(O)=O |            | NCC1=CC=C(C=C1)           |          | OC(C1=CC=C(C(=O)C=C1)=O     |            | NCC1CCOCC1                 |                      | OC(C1=CSC(C(=O)N1)=O   |
| 206         | 130424031504260817032805 | 4      |            | NCCOC               |          | ClC(C)C=C([C@@H](C)O)C(O)=O |            | NCC1=CC=C(C=C1)           |          | OC(C1=CC=C(C(=O)C=C1)=O     |            | NCC1CCO(C)C=CC=C2O1        |                      | OC([C@@H](C)O)=O [S]   |
| 207         | 130424041502260817032805 | 4      |            | NCC=C               |          | ClC(C)C=C([C@@H](C)O)C(O)=O |            | NCC(C)C(O)C               |          | OC(C1=CC=C(C(=O)C=C1)=O     |            | NCC1CCO(C)C=CC=C2O1        |                      | OC([C@@H](C)O)=O [S]   |
| 208         | 130424041502260817102804 | 4      |            | NCC=C               |          | ClC(C)C=C([C@@H](C)O)C(O)=O |            | NCC1=CC=C(N(C)C)C=C1      |          | OC(C1=CSC(C(=O)N1)=O        |            | N[C@@H](C)C1=CC=CC=C1[S]   |                      | O=C(O)C1=C(C)OC=C1     |
| 209         | 130424051502260817022804 | 4      |            | NCC1=CC=C(C(=O)O)C  |          | ClC(C)C=C([C@@H](C)O)C(O)=O |            | NCC(C)C(O)C               |          | OC(C1=CC=C(C(=O)C=C1)=O     |            | N[C@@H](C)C1=CC=CC=C1[R]   |                      | CC(O)=O                |
| 210         | 130424051504260817032802 | 4      |            | NCC1=CC=C(C(=O)O)C  |          | ClC(C)C=C([C@@H](C)O)C(O)=O |            | NCC(C)C(O)C               |          | OC(C1=CC=C(C(=O)C=C1)=O     |            | NCCO                       |                      | OC([C@@H](C)O)=O [S]   |
| 211         | 130424051504260817032805 | 4      |            | NCC1=CC=C(C(=O)O)C  |          | ClC(C)C=C([C@@H](C)O)C(O)=O |            | NCC1=CC=C(C(=O)F)F=C1     |          | ClC(C)C=C([C@@H](C)O)C(O)=O |            | NCC1CCO(C)C=CC=C2O1        |                      | OC([C@@H](C)O)=O [S]   |
| 212         | 130424071501260817022809 | 4      |            | NCC1=CC=C(C)C=C1    |          | ClC(C)C=C([C@@H](C)O)C(O)=O |            | NCC1=CC=C(C=C1)           |          | OC(C1=CC=C(C(=O)C=C1)=O     |            | NCC1CCOCC1                 |                      | ClCC1=CC(C(=O)O)=CC=C1 |
| 213         | 130424071502260817032802 | 4      |            | NCC1=CC=C(C)C=C1    |          | ClC(C)C=C([C@@H](C)O)C(O)=O |            | NCC1=CC=C(C(=O)F)F=C1     |          | ClC(C)C=C([C@@H](C)O)C(O)=O |            | NCCO                       |                      | OC([C@@H](C)O)=O [S]   |
| 214         | 130424091501260317032803 | 4      |            | NCCCN1C=CN=C1       |          | ClC(C)C=C([C@@H](C)O)C(O)=O |            | NCC1=CC=C(S1)             |          | OC(C1=CCO(C(=O)N1)=O        |            | NCCCN1C=CN=C1              |                      | OC([C@@H](C)O)=O [S]   |
| 215         | 130424091501260417032803 | 4      |            | NCCCN1C=CN=C1       |          | ClC(C)C=C([C@@H](C)O)C(O)=O |            | NCCN(C)C=O                |          | OC(C1=CC=C(C(=O)C=C1)=O     |            | NCCCN1C=CN=C1              |                      | OC([C@@H](C)O)=O [S]   |
| 216         | 130424091504260817102804 | 4      |            | NCCCN1C=CN=C1       |          | ClC(C)C=C([C@@H](C)O)C(O)=O |            | NCC(C)C(O)C               |          | OC(C1=CC=C(C(=O)C=C1)=O     |            | N[C@@H](C)C1=CC=CC=C1[S]   |                      | O=C(O)C1=C(C)OC=C1     |
| 217         | 130424091504261017022803 | 4      |            | NCCCN1C=CN=C1       |          | ClC(C)C=C([C@@H](C)O)C(O)=O |            | NCC1=CC=C(C)C=C1          |          | ClC(C)C=C([C@@H](C)O)C(O)=O |            | NCCCN1C=CN=C1              |                      | ClCC1=CC(C(=O)O)=CC=C1 |
| 218         | 130424091502260817022803 | 4      |            | NCCCN1C=CN=C1       |          | ClC(C)C=C([C@@H](C)O)C(O)=O |            | NCC1=CC=C(C(=O)F)F=C1     |          | ClC(C)C=C([C@@H](C)O)C(O)=O |            | NCCCN1C=CN=C1              |                      | ClCC1=CC(C(=O)O)=CC=C1 |
| 219         | 130424101502260217022803 | 4      |            | C1CNCCN1            |          | ClC(C)C=C([C@@H](C)O)C(O)=O |            | NCC1=CC=C(S(=O)(=O)C)C=C1 |          | OC(C1=CCO(C(=O)N1)=O        |            | NCCCN1C=CN=C1              |                      | ClCC1=CC(C(=O)O)=CC=C1 |
| 220         | 130424101502260817022804 | 4      |            | C1CNCCN1            |          | ClC(C)C=C([C@@H](C)O)C(O)=O |            | N[C@@H](C)C1=CC=CC=C1     |          | OC(C1=CSC(C(=O)N1)=O        |            | NCC1=CC=C(O1)              |                      | ClCC1=CC(C(=O)O)=CC=C1 |
| 221         | 130424101502261017022807 | 4      |            | C1CNCCN1            |          | ClC(C)C=C([C@@H](C)O)C(O)=O |            | NCC1=CC=C(C)C=C1          |          | ClC(C)C=C([C@@H](C)O)C(O)=O |            | NCC1=CC(O)C=CC(=O)C=C1     |                      | ClCC1=CC(C(=O)O)=CC=C1 |
| 222         | 131024021502260417022804 | 4      |            | NCC1=CC(F)=C(F)C=C1 |          | ClCC1=CC(C(=O)O)=CC=C1      |            | NCCN(C)C=O                |          | OC(C1=CC=C(C(=O)C=C1)=O     |            | N[C@@H](C)C1=CC=CC=C1[R]   |                      | CC(O)=O                |
| 223         | 131024031501260417032810 | 4      |            | NCC1=CC(F)=C(F)C=C1 |          | OC(C1=CSC(C(=O)N1)=O        |            | NCCN(C)C=O                |          | OC(C1=CC=C(C(=O)C=C1)=O     |            | NCCCN1=CC(O)C(=O)C(=O)C=C1 |                      | OC([C@@H](C)O)=O [S]   |
| 224         | 131024031503260317032806 | 4      |            | NCC1=CC(F)=C(F)C=C1 |          | OC(C1=CSC(C(=O)N1)=O        |            | NCC1=CC=C(S1)             |          | OC(C1=CCO(C(=O)N1)=O        |            | N[C@@H](C)C1=CC=CC=C1      |                      | OC([C@@H](C)O)=O [S]   |
| 225         | 131024031503260417032804 | 4      |            | NCC1=CC(F)=C(F)C=C1 |          | OC(C1=CSC(C(=O)N1)=O        |            | NCCN(C)C=O                |          | OC(C1=CC=C(C(=O)C=C1)=O     |            | NCC1=CC=C(O1)              |                      | OC([C@@H](C)O)=O [S]   |
| 226         | 131024031503260417042803 | 4      |            | NCC1=CC(F)=C(F)C=C1 |          | OC(C1=CSC(C(=O)N1)=O        |            | NCCN(C)C=O                |          | OC(C1=CC=C(C(=O)C=C1)=O     |            | NCCCN1C=CN=C1              |                      | OC([C@@H](C)O)=O [R]   |
| 227         | 131024031504260817032810 | 4      |            | NCC1=CC(F)=C(F)C=C1 |          | OC(C1=CSC(C(=O)N1)=O        |            | N[C@@H](C)C1=CC=CC=C1     |          | OC(C1=CSC(C(=O)N1)=O        |            | NCCCN1=CC(O)C(=O)C(=O)C=C1 |                      | OC([C@@H](C)O)=O [S]   |
| 228         | 130124011502260917092802 | 3      |            | NCC1=CC=C(C(Br))=C1 |          | OC(C1=CCO(C(=O)N1)=O        |            | NCC1=CC(F)=CC(C(=O)F)F=C1 |          | OC(C1=CSC(C(=O)N1)=O        |            | N[C@@H](C)C1=CC=CC=C1[R]   |                      | ClCC1=CC(C(=O)O)=CC=C1 |
| 229         | 130124021502260317032803 | 3      |            | NCC1=CC=CN=C1       |          | OC(C1=CCO(C(=O)N1)=O        |            | NCC1=CC=C(S1)             |          | OC(C1=CCO(C(=O)N1)=O        |            | NCCCN1C=CN=C1              |                      | OC([C@@H](C)O)=O [S]   |
| 230         | 130124031501260417022804 | 3      |            | NCCOC               |          | OC(C1=CCO(C(=O)N1)=O        |            | NCCN(C)C=O                |          | OC(C1=CC=C(C(=O)C=C1)=O     |            | N[C@@H](C)C1=CC=CC=C1[R]   |                      | CC(O)=O                |
| 231         | 130124031502260317032810 | 3      |            | NCCOC               |          | OC(C1=CCO(C(=O)N1)=O        |            | NCC1=CC=C(S1)             |          | OC(C1=CCO(C(=O)N1)=O        |            | NCCCN1=CC(O)C(=O)C(=O)C=C1 |                      | OC([C@@H](C)O)=O [S]   |
| 232         | 130124031502260717032803 | 3      |            | NCCOC               |          | OC(C1=CCO(C(=O)N1)=O        |            | NCC1=CC=C(N(C)C)C=C1      |          | OC(C1=CSC(C(=O)N1)=O        |            | NCCCN1C=CN=C1              |                      | OC([C@@H](C)O)=O [S]   |

| observation | full_mol.code2            | copies | Amines(X1) | Amines(X1):smiles | Acid(X1) | Acid(X1):smiles       | Amines(X2) | Amines(X2):smiles         | Acid(X2) | Acid(X2):smiles         | Amines(X3) | Amines(X3):smiles          | Structure of Pair... | Pair3Acids              |
|-------------|---------------------------|--------|------------|-------------------|----------|-----------------------|------------|---------------------------|----------|-------------------------|------------|----------------------------|----------------------|-------------------------|
| 233         | 130124031503260817032801  | 3      |            | NCCCC             |          | OC(C1=CO(C(C)C)=N1)=O |            | N[C@@H](C)C1=CC=CC=C1     |          | OC(C1=CSC(C)C)=N1=O     |            | NCCC1=CN(C2=CC=CC=C2)C=C21 |                      | OC([C@@H](C)C)=O [S]    |
| 234         | 130124031503260917032803  | 3      |            | NCCCC             |          | OC(C1=CO(C(C)C)=N1)=O |            | NCC1=CC(F)=CC(C(F)F)F=C1  |          | OC(C1=CSC(C)C)=N1=O     |            | NCCCN1C=CN=C1              |                      | OC([C@@H](C)C)=O [S]    |
| 235         | 130124031506260217012809  | 3      |            | NCCCC             |          | OC(C1=CO(C(C)C)=N1)=O |            | NCC1=CC=C(C(C)F)F=C1      |          | ClC(C)=C[C@@H](C)C(O)=O |            | NCC1CCCC1                  |                      | OC(C1=CSC(C)C)=N1=O     |
| 236         | 130124041501261017022809  | 3      |            | NCC=C             |          | OC(C1=CO(C(C)C)=N1)=O |            | NCC1=CC=C(C)C=C1          |          | ClC(C)=C[C@@H](C)C(O)=O |            | NCC1CCCC1                  |                      | ClC(C1=CC(O)C)=O)=CC=C1 |
| 237         | 130124041501261017042803  | 3      |            | NCC=C             |          | OC(C1=CO(C(C)C)=N1)=O |            | NCC1=CC=C(C)C=C1          |          | ClC(C)=C[C@@H](C)C(O)=O |            | NCCCN1C=CN=C1              |                      | OC([C@@H](C)Br)=O [R]   |
| 238         | 130124041502260417102803  | 3      |            | NCC=C             |          | OC(C1=CO(C(C)C)=N1)=O |            | NCCN(C)C=O                |          | OC(C1=CC=C(C)C)=O       |            | N[C@@H](C)C1=CC=CC=C1 [S]  |                      | OC([C@@H](C)C)=O [S]    |
| 239         | 130124041504260417032804  | 3      |            | NCC=C             |          | OC(C1=CO(C(C)C)=N1)=O |            | NCCN(C)C=O                |          | OC(C1=CC=C(C)C)=O       |            | NCC1=CC=C1                 |                      | OC([C@@H](C)C)=O [S]    |
| 240         | 130124041504260417092804  | 3      |            | NCC=C             |          | OC(C1=CO(C(C)C)=N1)=O |            | NCCN(C)C=O                |          | OC(C1=CC=C(C)C)=O       |            | N[C@@H](C)C1=CC=CC=C1 [R]  |                      | CC(O)=O                 |
| 241         | 1301240415102260417102803 | 3      |            | NCC=C             |          | OC(C1=CO(C(C)C)=N1)=O |            | CC(C)CCN                  |          | ClC(C)=C[C@@H](C)C(O)=O |            | N[C@@H](C)C1=CC=CC=C1 [S]  |                      | OC([C@@H](C)C)=O [S]    |
| 242         | 130124051501260317032802  | 3      |            | NCC1=CC=C(C)C=C1  |          | OC(C1=CO(C(C)C)=N1)=O |            | NCC1=CC=C(S1)C=C1         |          | OC(C1=CO(C)C)=N1=O      |            | NCCO                       |                      | OC([C@@H](C)C)=O [S]    |
| 243         | 130124051501260917022805  | 3      |            | NCC1=CC=C(C)C=C1  |          | OC(C1=CO(C(C)C)=N1)=O |            | NCC1=CC(F)=CC(C(F)F)F=C1  |          | OC(C1=CSC(C)C)=N1=O     |            | NCC1COO(C=CC=C2)C=C2O1     |                      | ClC(C1=CC(O)C)=O)=CC=C1 |
| 244         | 130124051502260317022803  | 3      |            | NCC1=CC=C(C)C=C1  |          | OC(C1=CO(C(C)C)=N1)=O |            | NCC1=CC=C(S1)C=C1         |          | OC(C1=CO(C)C)=N1=O      |            | NCCCN1C=CN=C1              |                      | ClC(C1=CC(O)C)=O)=CC=C1 |
| 245         | 130124051502260417012804  | 3      |            | NCC1=CC=C(C)C=C1  |          | OC(C1=CO(C(C)C)=N1)=O |            | NCCN(C)C=O                |          | OC(C1=CC=C(C)C)=O       |            | NCC1=CC=C1                 |                      | OC(C1=CSC(C)C)=N1=O     |
| 246         | 130124051503260417012808  | 3      |            | NCC1=CC=C(C)C=C1  |          | OC(C1=CO(C(C)C)=N1)=O |            | NCCN(C)C=O                |          | OC(C1=CC=C(C)C)=O       |            | BrC1=CC=C(C)N(C)C=C1       |                      | OC(C1=CSC(C)C)=N1=O     |
| 247         | 130124051503260417032806  | 3      |            | NCC1=CC=C(C)C=C1  |          | OC(C1=CO(C(C)C)=N1)=O |            | NCCN(C)C=O                |          | OC(C1=CC=C(C)C)=O       |            | N[C@@H](C)C1=CC=CC=C1      |                      | OC([C@@H](C)C)=O [S]    |
| 248         | 130124051503261017012809  | 3      |            | NCC1=CC=C(C)C=C1  |          | OC(C1=CO(C(C)C)=N1)=O |            | NCC1=CC=C(C)C=C1          |          | ClC(C)=C[C@@H](C)C(O)=O |            | NCC1CCCC1                  |                      | OC(C1=CSC(C)C)=N1=O     |
| 249         | 130124051504260817032809  | 3      |            | NCC1=CC=C(C)C=C1  |          | OC(C1=CO(C(C)C)=N1)=O |            | N[C@@H](C)C1=CC=CC=C1     |          | OC(C1=CSC(C)C)=N1=O     |            | NCC1CCCC1                  |                      | OC([C@@H](C)C)=O [S]    |
| 250         | 130124051504260917012809  | 3      |            | NCC1=CC=C(C)C=C1  |          | OC(C1=CO(C(C)C)=N1)=O |            | NCC1=CC(F)=CC(C(F)F)F=C1  |          | OC(C1=CSC(C)C)=N1=O     |            | NCC1CCCC1                  |                      | OC(C1=CSC(C)C)=N1=O     |
| 251         | 130124061510260317102804  | 3      |            | NCC1=CC=C1        |          | OC(C1=CO(C(C)C)=N1)=O |            | CC(C)CCN                  |          | ClC(C)=C[C@@H](C)C(O)=O |            | N[C@@H](C)C1=CC=CC=C1 [S]  |                      | O=C(O)C1=C(C)C=C1       |
| 252         | 130124071501260117102804  | 3      |            | NCC1=CC=C(C)C=C1  |          | OC(C1=CO(C(C)C)=N1)=O |            | NCCO                      |          | OC(C1=CO(C)C)=N1=O      |            | N[C@@H](C)C1=CC=CC=C1 [S]  |                      | O=C(O)C1=C(C)C=C1       |
| 253         | 130124071501260417022803  | 3      |            | NCC1=CC=C(C)C=C1  |          | OC(C1=CO(C(C)C)=N1)=O |            | NCCN(C)C=O                |          | OC(C1=CC=C(C)C)=O       |            | NCCCN1C=CN=C1              |                      | ClC(C1=CC(O)C)=O)=CC=C1 |
| 254         | 130124071501260917032801  | 3      |            | NCC1=CC=C(C)C=C1  |          | OC(C1=CO(C(C)C)=N1)=O |            | NCC1=CC=CC=C1             |          | OC(C1=CC=C(C)C)=O       |            | NCC1=CN(C2=CC=CC=C2)C=C21  |                      | OC([C@@H](C)C)=O [S]    |
| 255         | 130124071501260717012809  | 3      |            | NCC1=CC=C(C)C=C1  |          | OC(C1=CO(C(C)C)=N1)=O |            | NCC1=CC=C(N(C)C)C=C1      |          | OC(C1=CSC(C)C)=N1=O     |            | NCC1CCCC1                  |                      | OC(C1=CSC(C)C)=N1=O     |
| 256         | 130124071501260817032803  | 3      |            | NCC1=CC=C(C)C=C1  |          | OC(C1=CO(C(C)C)=N1)=O |            | N[C@@H](C)C1=CC=CC=C1     |          | OC(C1=CSC(C)C)=N1=O     |            | NCCCN1C=CN=C1              |                      | OC([C@@H](C)C)=O [S]    |
| 257         | 130124071501260817032809  | 3      |            | NCC1=CC=C(C)C=C1  |          | OC(C1=CO(C(C)C)=N1)=O |            | N[C@@H](C)C1=CC=CC=C1     |          | OC(C1=CSC(C)C)=N1=O     |            | NCC1CCCC1                  |                      | OC([C@@H](C)C)=O [S]    |
| 258         | 130124071501260917092804  | 3      |            | NCC1=CC=C(C)C=C1  |          | OC(C1=CO(C(C)C)=N1)=O |            | NCC1=CC(F)=CC(C(F)F)F=C1  |          | OC(C1=CSC(C)C)=N1=O     |            | N[C@@H](C)C1=CC=CC=C1 [R]  |                      | CC(O)=O                 |
| 259         | 130124071502261017022808  | 3      |            | NCC1=CC=C(C)C=C1  |          | OC(C1=CO(C(C)C)=N1)=O |            | NCC1=CC=C(C)C=C1          |          | ClC(C)=C[C@@H](C)C(O)=O |            | BrC1=CC=C(C)N(C)C=C1       |                      | ClC(C1=CC(O)C)=O)=CC=C1 |
| 260         | 130124071502261017092804  | 3      |            | NCC1=CC=C(C)C=C1  |          | OC(C1=CO(C(C)C)=N1)=O |            | NCC1=CC=C(C)C=C1          |          | ClC(C)=C[C@@H](C)C(O)=O |            | N[C@@H](C)C1=CC=CC=C1 [R]  |                      | CC(O)=O                 |
| 261         | 130124071503260917032802  | 3      |            | NCC1=CC=C(C)C=C1  |          | OC(C1=CO(C(C)C)=N1)=O |            | NCC1=CC=CC=C1             |          | OC(C1=CC=C(C)C)=O       |            | NCCO                       |                      | OC([C@@H](C)C)=O [S]    |
| 262         | 130124071504260517032802  | 3      |            | NCC1=CC=C(C)C=C1  |          | OC(C1=CO(C(C)C)=N1)=O |            | NCC(C)C(O)                |          | OC(C1=CC=C(C)C)=O       |            | NCCO                       |                      | OC([C@@H](C)C)=O [S]    |
| 263         | 130124071504260917022804  | 3      |            | NCC1=CC=C(C)C=C1  |          | OC(C1=CO(C(C)C)=N1)=O |            | NCC1=CC=CC=C1             |          | OC(C1=CC=C(C)C)=O       |            | NCC1=CC=C1                 |                      | ClC(C1=CC(O)C)=O)=CC=C1 |
| 264         | 130124071506260117102803  | 3      |            | NCC1=CC=C(C)C=C1  |          | OC(C1=CO(C(C)C)=N1)=O |            | NCC1=CC=C(C)C=C1          |          | ClC(C)=C[C@@H](C)C(O)=O |            | N[C@@H](C)C1=CC=CC=C1 [S]  |                      | OC([C@@H](C)C)=O [S]    |
| 265         | 130124081501260217022803  | 3      |            | NCCO              |          | OC(C1=CO(C(C)C)=N1)=O |            | NCC1=CC=C(S(=O)(=O)C)C=C1 |          | OC(C1=CO(C)C)=N1=O      |            | NCCCN1C=CN=C1              |                      | ClC(C1=CC(O)C)=O)=CC=C1 |

| observation | full_mol.code2           | copies | Amines(X1) | Amines(X1):smiles  | Acid(X1) | Acid(X1):smiles       | Amines(X2) | Amines(X2):smiles     | Acid(X2) | Acid(X2):smiles          | Amines(X3) | Amines(X3):smiles        | Structure of Pair: | Pair:3Acids           |
|-------------|--------------------------|--------|------------|--------------------|----------|-----------------------|------------|-----------------------|----------|--------------------------|------------|--------------------------|--------------------|-----------------------|
| 266         | 130124081501260217032802 | 3      |            | N1CCNCCC1          |          | OC(C1=COO(CO)N)=O     |            | NCC1=CC=C(C(=O)O)C=C  |          | OC(C1=COO(CO)N)=O        |            | NCCO                     |                    | OC(C@H)(Cl)C(=O)O [S] |
| 267         | 130124081501260517032805 | 3      |            | N1CCNCCC1          |          | OC(C1=COO(CO)N)=O     |            | NCC(C)C(O)            |          | OC(C1=COO(CO)N)=O        |            | NCC1COO(C=C)C(=O)C2O1    |                    | OC(C@H)(Cl)C(=O)O [S] |
| 268         | 130124081502261017012809 | 3      |            | N1CCNCCC1          |          | OC(C1=COO(CO)N)=O     |            | NCC1=CC=C(C)C=C1      |          | ClC(C)=C(Cl)C@H(C)C(O)=O |            | NCC1COOCC1               |                    | OC(C1=CSC(CO)N)=O     |
| 269         | 130124081503260517022809 | 3      |            | N1CCNCCC1          |          | OC(C1=COO(CO)N)=O     |            | NCC(C)C(O)            |          | OC(C1=COO(CO)N)=O        |            | NCC1COOCC1               |                    | ClC(C1=CC(CO)O)=CC=C1 |
| 270         | 130124081503260517092804 | 3      |            | N1CCNCCC1          |          | OC(C1=COO(CO)N)=O     |            | NCC(C)C(O)            |          | OC(C1=COO(CO)N)=O        |            | N(C@H)(Cl)C1=CC=CC=C1[R] |                    | CC(C)O=O              |
| 271         | 130124081506260317042803 | 3      |            | N1CCNCCC1          |          | OC(C1=COO(CO)N)=O     |            | NCC1=CC=C(C(F)F)F=C1  |          | ClC(C)=C(Cl)C@H(C)C(O)=O |            | NCCCN1C=C1               |                    | OC(C@H)(Cl)Br)=O [R]  |
| 272         | 130124091501260517092802 | 3      |            | NCCCN1C=CN=C1      |          | OC(C1=COO(CO)N)=O     |            | NCC(C)C(O)            |          | OC(C1=COO(CO)N)=O        |            | N(C@H)(Cl)C1=CC=CC=C1[R] |                    | ClC(C1=CC(CO)O)=CC=C1 |
| 273         | 130124091501260617042803 | 3      |            | NCCCN1C=CN=C1      |          | OC(C1=COO(CO)N)=O     |            | NCC1=CC=CC=C1         |          | OC(C1=COO(CO)N)=O        |            | NCCCN1C=C1               |                    | OC(C@H)(Cl)Br)=O [R]  |
| 274         | 130124091502260317022809 | 3      |            | NCCCN1C=CN=C1      |          | OC(C1=COO(CO)N)=O     |            | NCC1=CC=CS1           |          | OC(C1=COO(CO)N)=O        |            | NCC1COOCC1               |                    | ClC(C1=CC(CO)O)=CC=C1 |
| 275         | 130124091502260417042803 | 3      |            | NCCCN1C=CN=C1      |          | OC(C1=COO(CO)N)=O     |            | NCCNC(C)O             |          | OC(C1=COO(CO)N)=O        |            | NCCCN1C=CN=C1            |                    | OC(C@H)(Cl)Br)=O [R]  |
| 276         | 130124091502260917092804 | 3      |            | NCCCN1C=CN=C1      |          | OC(C1=COO(CO)N)=O     |            | NCC1=CC=C(N(C)C)C=C1  |          | OC(C1=CSC(CO)N)=O        |            | N(C@H)(Cl)C1=CC=CC=C1[R] |                    | CC(C)O=O              |
| 277         | 130124091502260917022809 | 3      |            | NCCCN1C=CN=C1      |          | OC(C1=COO(CO)N)=O     |            | NCC1=CC(F)=CC(F)F=C1  |          | OC(C1=CSC(CO)N)=O        |            | NCC1COOCC1               |                    | ClC(C1=CC(CO)O)=CC=C1 |
| 278         | 130124091503260517032803 | 3      |            | NCCCN1C=CN=C1      |          | OC(C1=COO(CO)N)=O     |            | NCC(C)C(O)            |          | OC(C1=COO(CO)N)=O        |            | NCCCN1C=CN=C1            |                    | OC(C@H)(Cl)C(=O)O [S] |
| 279         | 130124091504260517022803 | 3      |            | NCCCN1C=CN=C1      |          | OC(C1=COO(CO)N)=O     |            | NCC(C)C(O)            |          | OC(C1=COO(CO)N)=O        |            | NCCCN1C=CN=C1            |                    | ClC(C1=CC(CO)O)=CC=C1 |
| 280         | 130124091504260917042803 | 3      |            | NCCCN1C=CN=C1      |          | OC(C1=COO(CO)N)=O     |            | NCC1=CC(F)=CC(F)F=C1  |          | OC(C1=CSC(CO)N)=O        |            | NCCCN1C=C1               |                    | OC(C@H)(Cl)Br)=O [R]  |
| 281         | 130124091509260217032803 | 3      |            | NCCCN1C=CN=C1      |          | OC(C1=COO(CO)N)=O     |            | NCC1=CC=C(C(F)F)F=C1  |          | ClC(C)=C(Cl)C@H(C)C(O)=O |            | NCCCN1C=CN=C1            |                    | OC(C@H)(Cl)C(=O)O [S] |
| 282         | 130124091509260317022804 | 3      |            | NCCCN1C=CN=C1      |          | OC(C1=COO(CO)N)=O     |            | NCC1=CC=C(C(F)F)F=C1  |          | OC(C1=CSC(CO)N)=O        |            | NCC1=CC=C1               |                    | ClC(C1=CC(CO)O)=CC=C1 |
| 283         | 130124101503260717032803 | 3      |            | C1CNCCN1           |          | OC(C1=COO(CO)N)=O     |            | NCC1=CC=C(N)C=C1      |          | OC(C1=CSC(CO)N)=O        |            | NCCCN1C=CN=C1            |                    | OC(C@H)(Cl)C(=O)O [S] |
| 284         | 130124101503260717102804 | 3      |            | C1CNCCN1           |          | OC(C1=COO(CO)N)=O     |            | NCC1=CC=C(N(C)C)C=C1  |          | OC(C1=CSC(CO)N)=O        |            | N(C@H)(Cl)C1=CC=CC=C1[S] |                    | OC(C)C1=C(C)OC=C1     |
| 285         | 130124101503260817032803 | 3      |            | C1CNCCN1           |          | OC(C1=COO(CO)N)=O     |            | N(C@H)(Cl)C1=CC=CC=C1 |          | OC(C1=CSC(CO)N)=O        |            | NCCCN1C=CN=C1            |                    | OC(C@H)(Cl)C(=O)O [S] |
| 286         | 130124101503260817042803 | 3      |            | C1CNCCN1           |          | OC(C1=COO(CO)N)=O     |            | N(C@H)(Cl)C1=CC=CC=C1 |          | OC(C1=CSC(CO)N)=O        |            | NCCCN1C=CN=C1            |                    | OC(C@H)(Cl)Br)=O [R]  |
| 287         | 130124101504260917032803 | 3      |            | C1CNCCN1           |          | OC(C1=COO(CO)N)=O     |            | NCC1=CC=CC=C1         |          | OC(C1=COO(CO)N)=O        |            | NCCCN1C=CN=C1            |                    | OC(C@H)(Cl)C(=O)O [S] |
| 288         | 130124101504261017012805 | 3      |            | C1CNCCN1           |          | OC(C1=COO(CO)N)=O     |            | NCC1=CC=C(C)C=C1      |          | ClC(C)=C(Cl)C@H(C)C(O)=O |            | NCC1COO(C=C)C(=O)C2O1    |                    | OC(C1=CSC(CO)N)=O     |
| 289         | 130224011503260717032803 | 3      |            | NCC1=CC=C(CO)Br=C1 |          | ClC(C1=CC(CO)O)=CC=C1 |            | NCC1=CC=C(N(C)C)C=C1  |          | OC(C1=CSC(CO)N)=O        |            | NCCCN1C=CN=C1            |                    | OC(C@H)(Cl)C(=O)O [S] |
| 290         | 130224011504260817032809 | 3      |            | NCC1=CC=C(CO)Br=C1 |          | ClC(C1=CC(CO)O)=CC=C1 |            | N(C@H)(Cl)C1=CC=CC=C1 |          | OC(C1=CSC(CO)N)=O        |            | NCC1COOCC1               |                    | OC(C@H)(Cl)C(=O)O [S] |
| 291         | 130224031501260417022809 | 3      |            | NCCOCC             |          | ClC(C1=CC(CO)O)=CC=C1 |            | NCCNC(C)O             |          | OC(C1=COO(CO)N)=O        |            | NCC1COOCC1               |                    | ClC(C1=CC(CO)O)=CC=C1 |
| 292         | 130224031501260617022805 | 3      |            | NCCOCC             |          | ClC(C1=CC(CO)O)=CC=C1 |            | NCC1=CC=C(C)C=C1      |          | OC(C1=COO(CO)N)=O        |            | NCC1COO(C=C)C(=O)C2O1    |                    | ClC(C1=CC(CO)O)=CC=C1 |
| 293         | 130224031503260817102804 | 3      |            | NCCOCC             |          | ClC(C1=CC(CO)O)=CC=C1 |            | N(C@H)(Cl)C1=CC=CC=C1 |          | OC(C1=CSC(CO)N)=O        |            | N(C@H)(Cl)C1=CC=CC=C1[S] |                    | OC(C)C1=C(C)OC=C1     |
| 294         | 130224031504260817032803 | 3      |            | NCCOCC             |          | ClC(C1=CC(CO)O)=CC=C1 |            | N(C@H)(Cl)C1=CC=CC=C1 |          | OC(C1=CSC(CO)N)=O        |            | NCCCN1C=CN=C1            |                    | OC(C@H)(Cl)C(=O)O [S] |
| 295         | 130224031504261017012803 | 3      |            | NCCOCC             |          | ClC(C1=CC(CO)O)=CC=C1 |            | NCC1=CC=C(C)C=C1      |          | ClC(C)=C(Cl)C@H(C)C(O)=O |            | NCCCN1C=CN=C1            |                    | OC(C1=CSC(CO)N)=O     |
| 296         | 130224031509260417032810 | 3      |            | NCCOCC             |          | ClC(C1=CC(CO)O)=CC=C1 |            | NCC1=CC=C(C(F)F)F=C1  |          | ClC(C)=C(Cl)C@H(H)C(O)=O |            | NCC1=CC=C(CO)C(C)C=C1    |                    | OC(C@H)(Cl)C(=O)O [S] |
| 297         | 130224041504260417092804 | 3      |            | NCC=C              |          | ClC(C1=CC(CO)O)=CC=C1 |            | NCCNC(C)O             |          | OC(C1=COO(CO)N)=O        |            | N(C@H)(Cl)C1=CC=CC=C1[R] |                    | CC(C)O=O              |
| 298         | 130224041509260217092804 | 3      |            | NCC=C              |          | ClC(C1=CC(CO)O)=CC=C1 |            | NCC1=CC=C(C(F)F)F=C1  |          | ClC(C)=C(Cl)C@H(H)C(O)=O |            | N(C@H)(Cl)C1=CC=CC=C1[R] |                    | CC(C)O=O              |



| observation | full_mol_code2           | copies | Amines(X1) | Amines(X1)-smiles     | Acid(X1) | Acid(X1)-smiles        | Amines(X2) | Amines(X2)-smiles         | Acid(X2) | Acid(X2)-smiles          | Amines(X3) | Amines(X3)-smiles         | Structure of Pair... | Pair3Acids             |
|-------------|--------------------------|--------|------------|-----------------------|----------|------------------------|------------|---------------------------|----------|--------------------------|------------|---------------------------|----------------------|------------------------|
| 299         | 130224041502260417032803 | 3      |            | NCC=C                 |          | ClCC1=CC(C(O)=O)=CC=C1 |            | NCC1=CC=C(C(F)(F)F)=C1    |          | ClC(C)=C1C=C@H(C)C(C)O=O |            | NCCCN1C=CN=C1             |                      | OC1=C@H(C)C(O)=O [S]   |
| 300         | 130224051501260517022803 | 3      |            | NCC1=CC=C(C(=O)O)C=C1 |          | ClCC1=CC(C(O)=O)=CC=C1 |            | NCC(C)C(O)O               |          | OC(C1=CC=C(C)C)C=C1=O    |            | NCCCN1C=CN=C1             |                      | ClCC1=CC(C(O)=O)=CC=C1 |
| 301         | 130224051501260517042803 | 3      |            | NCC1=CC=C(C(=O)O)C=C1 |          | ClCC1=CC(C(O)=O)=CC=C1 |            | NCC1=CC(F)=CC(C(F)F)=C1   |          | OC(C1=CC=C(C)C)N1=O      |            | NCCCN1C=CN=C1             |                      | OC1=C@H(C)C(O)=O [R]   |
| 302         | 130224051503260417032807 | 3      |            | NCC1=CC=C(C(=O)O)C=C1 |          | ClCC1=CC(C(O)=O)=CC=C1 |            | NCCN(C)C=O                |          | OC(C1=CC=C(C)C)O=C1=O    |            | NCC1=CC(O)C(OC)C=C1       |                      | OC1=C@H(C)C(O)=O [S]   |
| 303         | 130224051503260817032802 | 3      |            | NCC1=CC=C(C(=O)O)C=C1 |          | ClCC1=CC(C(O)=O)=CC=C1 |            | N[C@@H](C)C1=CC=CC=C1     |          | OC(C1=CC=C(C)C)N1=O      |            | NCCO                      |                      | OC1=C@H(C)C(O)=O [S]   |
| 304         | 130224051504260317022809 | 3      |            | NCC1=CC=C(C(=O)O)C=C1 |          | ClCC1=CC(C(O)=O)=CC=C1 |            | NCC1=CC=CS1               |          | OC(C1=CC=C(C)C)N1=O      |            | NCC1COCC1                 |                      | ClCC1=CC(C(O)=O)=CC=C1 |
| 305         | 130224051504260417032810 | 3      |            | NCC1=CC=C(C(=O)O)C=C1 |          | ClCC1=CC(C(O)=O)=CC=C1 |            | NCCN(C)C=O                |          | OC(C1=CC=C(C)C)C=C1=O    |            | NCC1=CC=C(C(OC)C)C=C1     |                      | OC1=C@H(C)C(O)=O [S]   |
| 306         | 13022405150626071702804  | 3      |            | NCC1=CC=C(C(=O)O)C=C1 |          | ClCC1=CC(C(O)=O)=CC=C1 |            | NCC1=CC=C(C(F)F)C=C1      |          | ClC(C)=C1C=C@H(C)C(C)O=O |            | N[C@@H](C)C1=CC=CC=C1 [S] |                      | O=C(O)C1=C(C)OC=C1     |
| 307         | 13022405151026021702804  | 3      |            | NCC1=CC=C(C(=O)O)C=C1 |          | ClCC1=CC(C(O)=O)=CC=C1 |            | CC(C)CCN                  |          | ClC(C)=C1C=C@H(C)C(C)O=O |            | N[C@@H](C)C1=CC=CC=C1 [S] |                      | O=C(O)C1=C(C)OC=C1     |
| 308         | 130224051503260817062804 | 3      |            | NCC1=CC=C(O)C=C1      |          | ClCC1=CC(C(O)=O)=CC=C1 |            | N[C@@H](C)C1=CC=CC=C1     |          | OC(C1=CC=C(C)C)N1=O      |            | N[C@@H](C)C1=CC=CC=C1 [R] |                      | CCC(O)=O               |
| 309         | 130224071501260217012803 | 3      |            | NCC1=CC=C(C)C=C1      |          | ClCC1=CC(C(O)=O)=CC=C1 |            | NCC1=CC=C(S(=O)(=O)C)C=C1 |          | OC(C1=CC=C(C)C)N1=O      |            | NCCCN1C=CN=C1             |                      | OC(C1=CC=C(C)C)N1=O    |
| 310         | 130224071501260517092804 | 3      |            | NCC1=CC=C(C)C=C1      |          | ClCC1=CC(C(O)=O)=CC=C1 |            | NCC(C)C(O)O               |          | OC(C1=CC=C(C)C)C=C1=O    |            | N[C@@H](C)C1=CC=CC=C1 [R] |                      | CCC(O)=O               |
| 311         | 130224071501261017032805 | 3      |            | NCC1=CC=C(C)C=C1      |          | ClCC1=CC(C(O)=O)=CC=C1 |            | NCC1=CC=C(C)C=C1          |          | ClC(C)=C1C=C@H(C)C(C)O=O |            | NCC1COCC(C=CC=C2)C2O1     |                      | OC1=C@H(C)C(O)=O [S]   |
| 312         | 13022407150326041702806  | 3      |            | NCC1=CC=C(C)C=C1      |          | ClCC1=CC(C(O)=O)=CC=C1 |            | NCCN(C)C=O                |          | OC(C1=CC=C(C)C)C=C1=O    |            | N[C@@H](C)C1=CC=CC=C1     |                      | OC(C1=CC=C(C)C)N1=O    |
| 313         | 130224091501260417032803 | 3      |            | NCCCN1C=CN=C1         |          | ClCC1=CC(C(O)=O)=CC=C1 |            | NCCN(C)C=O                |          | OC(C1=CC=C(C)C)C=C1=O    |            | NCCCN1C=CN=C1             |                      | OC1=C@H(C)C(O)=O [S]   |
| 314         | 130224091501260517032803 | 3      |            | NCCCN1C=CN=C1         |          | ClCC1=CC(C(O)=O)=CC=C1 |            | NCC(C)C(O)O               |          | OC(C1=CC=C(C)C)C=C1=O    |            | NCCCN1C=CN=C1             |                      | OC1=C@H(C)C(O)=O [S]   |
| 315         | 130224091502260217012809 | 3      |            | NCCCN1C=CN=C1         |          | ClCC1=CC(C(O)=O)=CC=C1 |            | NCC1=CC=C(S(=O)(=O)C)C=C1 |          | OC(C1=CC=C(C)C)N1=O      |            | NCC1COCC1                 |                      | OC(C1=CC=C(C)C)N1=O    |
| 316         | 130224091502260717032805 | 3      |            | NCCCN1C=CN=C1         |          | ClCC1=CC(C(O)=O)=CC=C1 |            | NCC1=CC=C(N(C)C)C=C1      |          | OC(C1=CC=C(C)C)N1=O      |            | NCC1COCC(C=CC=C2)C2O1     |                      | OC1=C@H(C)C(O)=O [S]   |
| 317         | 130224091503260317102804 | 3      |            | NCCCN1C=CN=C1         |          | ClCC1=CC(C(O)=O)=CC=C1 |            | NCC1=CC=CS1               |          | OC(C1=CC=C(C)C)N1=O      |            | N[C@@H](C)C1=CC=CC=C1 [S] |                      | O=C(O)C1=C(C)OC=C1     |
| 318         | 130224101501260617022810 | 3      |            | C1CNCCN1              |          | ClCC1=CC(C(O)=O)=CC=C1 |            | NCC1=CC=C(C)C=C1          |          | OC(C1=CC=C(C)C)C=C1=O    |            | NCC1=CC=C(C(OC)C)C=C1     |                      | ClCC1=CC(C(O)=O)=CC=C1 |
| 319         | 130224101501260817032802 | 3      |            | C1CNCCN1              |          | ClCC1=CC(C(O)=O)=CC=C1 |            | NCC1=CC=CC=C1             |          | OC(C1=CC=C(C)C)C=C1=O    |            | NCCO                      |                      | OC1=C@H(C)C(O)=O [S]   |
| 320         | 130224101502260717032803 | 3      |            | C1CNCCN1              |          | ClCC1=CC(C(O)=O)=CC=C1 |            | NCC1=CC=C(N(C)C)C=C1      |          | OC(C1=CC=C(C)C)N1=O      |            | NCCCN1C=CN=C1             |                      | OC1=C@H(C)C(O)=O [S]   |
| 321         | 130224101503260217032809 | 3      |            | C1CNCCN1              |          | ClCC1=CC(C(O)=O)=CC=C1 |            | NCC1=CC=C(S(=O)(=O)C)C=C1 |          | OC(C1=CC=C(C)C)N1=O      |            | NCC1COCC1                 |                      | OC1=C@H(C)C(O)=O [S]   |
| 322         | 130224101503260717042809 | 3      |            | C1CNCCN1              |          | ClCC1=CC(C(O)=O)=CC=C1 |            | NCC1=CC=C(N(C)C)C=C1      |          | OC(C1=CC=C(C)C)N1=O      |            | NCC1COCC1                 |                      | OC1=C@H(C)C(O)=O [R]   |
| 323         | 130224101510260317032801 | 3      |            | C1CNCCN1              |          | ClCC1=CC(C(O)=O)=CC=C1 |            | CC(C)CCN                  |          | ClC(C)=C1C=C@H(C)C(C)O=O |            | NCC1=C1C2=CC=C(C)C=C2     |                      | OC1=C@H(C)C(O)=O [S]   |
| 324         | 130224101510260317062804 | 3      |            | C1CNCCN1              |          | ClCC1=CC(C(O)=O)=CC=C1 |            | CC(C)CCN                  |          | ClC(C)=C1C=C@H(C)C(C)O=O |            | N[C@@H](C)C1=CC=CC=C1 [R] |                      | CCC(O)=O               |
| 325         | 130324031502260817022810 | 3      |            | NCCOCC                |          | OC(C1=CC=C(C)C)N1=O    |            | N[C@@H](C)C1=CC=CC=C1     |          | OC(C1=CC=C(C)C)N1=O      |            | NCC1=CC=C(C(OC)C)C=C1     |                      | ClCC1=CC(C(O)=O)=CC=C1 |
| 326         | 130324031502260817032802 | 3      |            | NCCOCC                |          | OC(C1=CC=C(C)C)N1=O    |            | N[C@@H](C)C1=CC=CC=C1     |          | OC(C1=CC=C(C)C)N1=O      |            | NCCO                      |                      | OC1=C@H(C)C(O)=O [S]   |
| 327         | 130324031503260517102804 | 3      |            | NCCOCC                |          | OC(C1=CC=C(C)C)N1=O    |            | NCC(C)C(O)O               |          | OC(C1=CC=C(C)C)C=C1=O    |            | N[C@@H](C)C1=CC=CC=C1 [S] |                      | O=C(O)C1=C(C)OC=C1     |
| 328         | 130324031504260517032802 | 3      |            | NCCOCC                |          | OC(C1=CC=C(C)C)N1=O    |            | NCC(C)C(O)O               |          | OC(C1=CC=C(C)C)C=C1=O    |            | NCCO                      |                      | OC1=C@H(C)C(O)=O [S]   |
| 329         | 130324031504260817022810 | 3      |            | NCCOCC                |          | OC(C1=CC=C(C)C)N1=O    |            | N[C@@H](C)C1=CC=CC=C1     |          | OC(C1=CC=C(C)C)N1=O      |            | NCC1=CC=C(C(OC)C)C=C1     |                      | ClCC1=CC(C(O)=O)=CC=C1 |
| 330         | 130324041502260217032802 | 3      |            | NCC=C                 |          | OC(C1=CC=C(C)C)N1=O    |            | NCC1=CC=C(S(=O)(=O)C)C=C1 |          | OC(C1=CC=C(C)C)N1=O      |            | NCCO                      |                      | OC1=C@H(C)C(O)=O [S]   |
| 331         | 130324041503260617022809 | 3      |            | NCC=C                 |          | OC(C1=CC=C(C)C)N1=O    |            | NCC1=CC=C(O)C=C1          |          | OC(C1=CC=C(C)C)C=C1=O    |            | NCC1COCC1                 |                      | ClCC1=CC(C(O)=O)=CC=C1 |

| observation | full_mol_code2           | copies | Amines(X1) | Amines(X1):smiles    | Acid(X1) | Acid(X1):smiles        | Amines(X2) | Amines(X2):smiles         | Acid(X2) | Acid(X2):smiles        | Amines(X3) | Amines(X3):smiles           | Structure of Pair... | Pair3 Acids            |
|-------------|--------------------------|--------|------------|----------------------|----------|------------------------|------------|---------------------------|----------|------------------------|------------|-----------------------------|----------------------|------------------------|
| 332         | 130324051501260417102804 | 3      |            | NCC1=CC=C(O)C(O)C=C1 |          | OC(=O)C=C(Cl)C(O)=N1=O |            | NCCN(C)C=O                |          | OC(=O)C=C(Cl)C(O)=N1=O |            | N[C@@H](C)C1=CC=CC=C1[S]    |                      | O=C(O)C1=C(Cl)OC=C1    |
| 333         | 130324051502260917102801 | 3      |            | NCC1=CC=C(O)C(O)C=C1 |          | OC(=O)C=C(Cl)C(O)=N1=O |            | NCC1=CC=C(C)C=C1          |          | OC(=O)C=C(Cl)C(O)=N1=O |            | N[C@@H](C)C1=CC=CC=C1[S]    |                      | OC(=O)C1=C(Cl)OC=C1    |
| 334         | 130324051503260717032809 | 3      |            | NCC1=CC=C(O)C(O)C=C1 |          | OC(=O)C=C(Cl)C(O)=N1=O |            | NCC1=CC=C(N(C)C)C=C1      |          | OC(=O)C=C(Cl)C(O)=N1=O |            | NCC1COCC1                   |                      | OC(=O)C1=C(Cl)OC=C1[S] |
| 335         | 130324051503260817032803 | 3      |            | NCC1=CC=C(O)C(O)C=C1 |          | OC(=O)C=C(Cl)C(O)=N1=O |            | N[C@@H](C)C1=CC=CC=C1     |          | OC(=O)C=C(Cl)C(O)=N1=O |            | NCCN1C=CN=C1                |                      | OC(=O)C1=C(Cl)OC=C1[S] |
| 336         | 130324051503260817102804 | 3      |            | NCC1=CC=C(O)C(O)C=C1 |          | OC(=O)C=C(Cl)C(O)=N1=O |            | N[C@@H](C)C1=CC=CC=C1     |          | OC(=O)C=C(Cl)C(O)=N1=O |            | N[C@@H](C)C1=CC=CC=C1[S]    |                      | O=C(O)C1=C(Cl)OC=C1    |
| 337         | 130324051504260517032802 | 3      |            | NCC1=CC=C(O)C(O)C=C1 |          | OC(=O)C=C(Cl)C(O)=N1=O |            | NCC(O)C(C)O               |          | OC(=O)C=C(Cl)C(O)=N1=O |            | NCCO                        |                      | OC(=O)C1=C(Cl)OC=C1[S] |
| 338         | 130324051504260917092804 | 3      |            | NCC1=CC=C(O)C(O)C=C1 |          | OC(=O)C=C(Cl)C(O)=N1=O |            | NCC1=CC=C(C)C=C1          |          | OC(=O)C=C(Cl)C(O)=N1=O |            | N[C@@H](C)C1=CC=CC=C1[R]    |                      | CCC(O)=O               |
| 339         | 130324051506260117032804 | 3      |            | NCC1=CC=C(O)C(O)C=C1 |          | OC(=O)C=C(Cl)C(O)=N1=O |            | NCC1=CC=C(C(F)F)C=C1      |          | OC(=O)C=C(Cl)C(O)=N1=O |            | NCC1=CC=C(C)C=C1            |                      | OC(=O)C1=C(Cl)OC=C1[S] |
| 340         | 130324051509260217012803 | 3      |            | NCC1=CC=C(O)C(O)C=C1 |          | OC(=O)C=C(Cl)C(O)=N1=O |            | NCC1=CC=C(C(F)F)C=C1      |          | OC(=O)C=C(Cl)C(O)=N1=O |            | NCCN1C=CN=C1                |                      | OC(=O)C1=C(Cl)OC=C1    |
| 341         | 130324051509260217032802 | 3      |            | NCC1=CC=C(O)C(O)C=C1 |          | OC(=O)C=C(Cl)C(O)=N1=O |            | NCC1=CC=C(C(F)F)C=C1      |          | OC(=O)C=C(Cl)C(O)=N1=O |            | NCCO                        |                      | OC(=O)C1=C(Cl)OC=C1[S] |
| 342         | 130324051510260417092804 | 3      |            | NCC1=CC=C(O)C(O)C=C1 |          | OC(=O)C=C(Cl)C(O)=N1=O |            | CC(C)CCN                  |          | OC(=O)C=C(Cl)C(O)=N1=O |            | N[C@@H](C)C1=CC=CC=C1[R]    |                      | CCC(O)=O               |
| 343         | 130324061509260217102804 | 3      |            | NCC1=CC=C(O)C(O)C=C1 |          | OC(=O)C=C(Cl)C(O)=N1=O |            | NCC1=CC=C(C(F)F)C=C1      |          | OC(=O)C=C(Cl)C(O)=N1=O |            | N[C@@H](C)C1=CC=CC=C1[S]    |                      | O=C(O)C1=C(Cl)OC=C1    |
| 344         | 130324071501260417032802 | 3      |            | NCC1=CC=C(O)C(O)C=C1 |          | OC(=O)C=C(Cl)C(O)=N1=O |            | NCCN(C)C=O                |          | OC(=O)C=C(Cl)C(O)=N1=O |            | NCCO                        |                      | OC(=O)C1=C(Cl)OC=C1[S] |
| 345         | 130324071501260817012803 | 3      |            | NCC1=CC=C(O)C(O)C=C1 |          | OC(=O)C=C(Cl)C(O)=N1=O |            | N[C@@H](C)C1=CC=CC=C1     |          | OC(=O)C=C(Cl)C(O)=N1=O |            | NCCN1C=CN=C1                |                      | OC(=O)C1=C(Cl)OC=C1    |
| 346         | 130324071502260317032802 | 3      |            | NCC1=CC=C(O)C(O)C=C1 |          | OC(=O)C=C(Cl)C(O)=N1=O |            | NCC1=CC=C(S)C=C1          |          | OC(=O)C=C(Cl)C(O)=N1=O |            | NCCO                        |                      | OC(=O)C1=C(Cl)OC=C1[S] |
| 347         | 130324071503260317092804 | 3      |            | NCC1=CC=C(O)C(O)C=C1 |          | OC(=O)C=C(Cl)C(O)=N1=O |            | NCC1=CC=C(S)C=C1          |          | OC(=O)C=C(Cl)C(O)=N1=O |            | N[C@@H](C)C1=CC=CC=C1[R]    |                      | CCC(O)=O               |
| 348         | 130324071503260817042803 | 3      |            | NCC1=CC=C(O)C(O)C=C1 |          | OC(=O)C=C(Cl)C(O)=N1=O |            | N[C@@H](C)C1=CC=CC=C1     |          | OC(=O)C=C(Cl)C(O)=N1=O |            | NCCN1C=CN=C1                |                      | OC(=O)C1=C(Cl)OC=C1[R] |
| 349         | 130324071509260417032801 | 3      |            | NCC1=CC=C(O)C(O)C=C1 |          | OC(=O)C=C(Cl)C(O)=N1=O |            | NCC1=CC=C(C(F)F)C=C1      |          | OC(=O)C=C(Cl)C(O)=N1=O |            | NCC1=C(N2=CC=CC=C2)C=CC=C21 |                      | OC(=O)C1=C(Cl)OC=C1[S] |
| 350         | 130324071509260417092804 | 3      |            | NCC1=CC=C(O)C(O)C=C1 |          | OC(=O)C=C(Cl)C(O)=N1=O |            | NCC1=CC=C(C(F)F)C=C1      |          | OC(=O)C=C(Cl)C(O)=N1=O |            | N[C@@H](C)C1=CC=CC=C1[R]    |                      | CCC(O)=O               |
| 351         | 130324071510260317032804 | 3      |            | NCC1=CC=C(O)C(O)C=C1 |          | OC(=O)C=C(Cl)C(O)=N1=O |            | CC(C)CCN                  |          | OC(=O)C=C(Cl)C(O)=N1=O |            | NCC1=CC=C(C)C=C1            |                      | OC(=O)C1=C(Cl)OC=C1[S] |
| 352         | 130324081503261017102804 | 3      |            | N1CCNCC1             |          | OC(=O)C=C(Cl)C(O)=N1=O |            | NCC1=CC=C(C)C=C1          |          | OC(=O)C=C(Cl)C(O)=N1=O |            | N[C@@H](C)C1=CC=CC=C1[S]    |                      | O=C(O)C1=C(Cl)OC=C1    |
| 353         | 130324081504260417102804 | 3      |            | N1CCNCC1             |          | OC(=O)C=C(Cl)C(O)=N1=O |            | NCCN(C)C=O                |          | OC(=O)C=C(Cl)C(O)=N1=O |            | N[C@@H](C)C1=CC=CC=C1[S]    |                      | O=C(O)C1=C(Cl)OC=C1    |
| 354         | 130324081509260417032803 | 3      |            | N1CCNCC1             |          | OC(=O)C=C(Cl)C(O)=N1=O |            | NCC1=CC=C(C(F)F)C=C1      |          | OC(=O)C=C(Cl)C(O)=N1=O |            | NCCN1C=CN=C1                |                      | OC(=O)C1=C(Cl)OC=C1[S] |
| 355         | 130324081510260417102802 | 3      |            | N1CCNCC1             |          | OC(=O)C=C(Cl)C(O)=N1=O |            | CC(C)CCN                  |          | OC(=O)C=C(Cl)C(O)=N1=O |            | N[C@@H](C)C1=CC=CC=C1[S]    |                      | ClC1=C(Cl)OC(O)=CC=C1  |
| 356         | 130324091502260317092804 | 3      |            | NCCN1C=CN=C1         |          | OC(=O)C=C(Cl)C(O)=N1=O |            | NCC1=CC=C(S)C=C1          |          | OC(=O)C=C(Cl)C(O)=N1=O |            | N[C@@H](C)C1=CC=CC=C1[R]    |                      | CCC(O)=O               |
| 357         | 130324091503260417032802 | 3      |            | NCCN1C=CN=C1         |          | OC(=O)C=C(Cl)C(O)=N1=O |            | NCCN(C)C=O                |          | OC(=O)C=C(Cl)C(O)=N1=O |            | NCCO                        |                      | OC(=O)C1=C(Cl)OC=C1[S] |
| 358         | 130324091503260717012808 | 3      |            | NCCN1C=CN=C1         |          | OC(=O)C=C(Cl)C(O)=N1=O |            | NCC1=CC=C(N(C)C)C=C1      |          | OC(=O)C=C(Cl)C(O)=N1=O |            | BrC1=CC=C(C)N=C1            |                      | OC(=O)C1=C(Cl)OC=C1    |
| 359         | 130324091503260817022803 | 3      |            | NCCN1C=CN=C1         |          | OC(=O)C=C(Cl)C(O)=N1=O |            | N[C@@H](C)C1=CC=CC=C1     |          | OC(=O)C=C(Cl)C(O)=N1=O |            | NCCN1C=CN=C1                |                      | ClC1=C(Cl)OC(O)=CC=C1  |
| 360         | 130324101502260217102804 | 3      |            | C1CNCC1              |          | OC(=O)C=C(Cl)C(O)=N1=O |            | NCC1=CC=C(S(=O)(=O)C)C=C1 |          | OC(=O)C=C(Cl)C(O)=N1=O |            | N[C@@H](C)C1=CC=CC=C1[S]    |                      | O=C(O)C1=C(Cl)OC=C1    |
| 361         | 130324101502260517092804 | 3      |            | C1CNCC1              |          | OC(=O)C=C(Cl)C(O)=N1=O |            | NCC(O)C(C)O               |          | OC(=O)C=C(Cl)C(O)=N1=O |            | N[C@@H](C)C1=CC=CC=C1[R]    |                      | CCC(O)=O               |
| 362         | 130324101503260917022803 | 3      |            | C1CNCC1              |          | OC(=O)C=C(Cl)C(O)=N1=O |            | NCC1=CC=C(C)C=C1          |          | OC(=O)C=C(Cl)C(O)=N1=O |            | NCCN1C=CN=C1                |                      | ClC1=C(Cl)OC(O)=CC=C1  |
| 363         | 130324101504260517022806 | 3      |            | C1CNCC1              |          | OC(=O)C=C(Cl)C(O)=N1=O |            | NCC1=CC=C(C)C=C1          |          | OC(=O)C=C(Cl)C(O)=N1=O |            | N[C@@H](C)C1=CC=CC=C1       |                      | ClC1=C(Cl)OC(O)=CC=C1  |
| 364         | 130324101504260617032802 | 3      |            | C1CNCC1              |          | OC(=O)C=C(Cl)C(O)=N1=O |            | NCC1=CC=C(C)C=C1          |          | OC(=O)C=C(Cl)C(O)=N1=O |            | NCCO                        |                      | OC(=O)C1=C(Cl)OC=C1[S] |

| observation | full_mol.code2           | copies | Amines(X1) | Amines(X1):smiles   | Acid(X1) | Acid(X1):smiles        | Amines(X2) | Amines(X2):smiles        | Acid(X2) | Acid(X2):smiles        | Amines(X3) | Amines(X3):smiles        | Structure of Pair... | Pair3Acids            |
|-------------|--------------------------|--------|------------|---------------------|----------|------------------------|------------|--------------------------|----------|------------------------|------------|--------------------------|----------------------|-----------------------|
| 365         | 130324101504260817032805 | 3      |            | C1CNCCN1            |          | OC(C)=CSC(C)(C)N1=O    |            | NCC1=CC=CC=C1            |          | OC(C)=CC(C)(CC)C=C1=O  |            | NCC1OC(C)C=CC=C2=C2O1    |                      | OC(C@H)(C)C=O [S]     |
| 366         | 130324101509260417042803 | 3      |            | C1CNCCN1            |          | OC(C)=CSC(C)(C)N1=O    |            | NCC1=CC=C(C(F)F)F=C1     |          | ClC(C)=C(C@H)(C)C(O)=O |            | NCCCN1C=CN=C1            |                      | OC(C@H)(C)Br)=O [R]   |
| 367         | 130324101510260817042804 | 3      |            | C1CNCCN1            |          | OC(C)=CSC(C)(C)N1=O    |            | CC(C)CCN                 |          | ClC(C)=C(C@H)(C)C(O)=O |            | NCC1=CC=CC=C1            |                      | OC(C@H)(C)Br)=O [R]   |
| 368         | 130424021501260817032803 | 3      |            | NCC1=CC=CN=C1       |          | ClC(C)=C(C@H)(C)C(O)=O |            | NCC1=CC=CC=C1            |          | OC(C)=CC(C)(CC)C=C1=O  |            | NCCCN1C=CN=C1            |                      | OC(C@H)(C)C=O [S]     |
| 369         | 130424021502260817022809 | 3      |            | NCC1=CC=CN=C1       |          | ClC(C)=C(C@H)(C)C(O)=O |            | N(C@H)(C)C1=CC=CC=C1     |          | OC(C)=CSC(C)(C)N1=O    |            | NCC1C1CCCC1              |                      | ClC1=CC(C(O)=O)=CC=C1 |
| 370         | 130424021504260717032803 | 3      |            | NCC1=CC=CN=C1       |          | ClC(C)=C(C@H)(C)C(O)=O |            | NCC1=CC=C(NC)C=C1        |          | OC(C)=CSC(C)(C)N1=O    |            | NCCCN1C=CN=C1            |                      | OC(C@H)(C)C=O [S]     |
| 371         | 130424031501260117102804 | 3      |            | NCCOC               |          | ClC(C)=C(C@H)(C)C(O)=O |            | NCCOC                    |          | OC(C)=CC(C)(C)N1=O     |            | N(C@H)(C)C1=CC=CC=C1 [S] |                      | O=C(O)C1=C(C)OC=C1    |
| 372         | 130424031501260417092804 | 3      |            | NCCOC               |          | ClC(C)=C(C@H)(C)C(O)=O |            | NCCN(C)=O                |          | OC(C)=CC(C)(CC)C=C1=O  |            | N(C@H)(C)C1=CC=CC=C1 [R] |                      | CC(O)=O               |
| 373         | 130424031501261017092804 | 3      |            | NCCOC               |          | ClC(C)=C(C@H)(C)C(O)=O |            | NCC1=CC=C(C)C=C1         |          | ClC(C)=C(C@H)(C)C(O)=O |            | N(C@H)(C)C1=CC=CC=C1 [R] |                      | CC(O)=O               |
| 374         | 130424031503260217032803 | 3      |            | NCCOC               |          | ClC(C)=C(C@H)(C)C(O)=O |            | NCC1=CC=C(S(=O)(=O)C)C=C |          | OC(C)=CC(C)(C)N1=O     |            | NCCCN1C=CN=C1            |                      | OC(C@H)(C)C=O [S]     |
| 375         | 130424031503260917022802 | 3      |            | NCCOC               |          | ClC(C)=C(C@H)(C)C(O)=O |            | NCC1=CC=CC=C1            |          | OC(C)=CC(C)(C)C=C1=O   |            | NCCO                     |                      | ClC1=CC(C(O)=O)=CC=C1 |
| 376         | 130424031503260717032802 | 3      |            | NCCOC               |          | ClC(C)=C(C@H)(C)C(O)=O |            | NCC1=CC=C(N(C)C)C=C1     |          | OC(C)=CSC(C)(C)N1=O    |            | NCCO                     |                      | OC(C@H)(C)C=O [S]     |
| 377         | 130424031503260917092803 | 3      |            | NCCOC               |          | ClC(C)=C(C@H)(C)C(O)=O |            | NCC1=CC=C(C)C=C1         |          | ClC(C)=C(C@H)(C)C(O)=O |            | N(C@H)(C)C1=CC=CC=C1 [R] |                      | OC(C@H)(C)C=O [S]     |
| 378         | 130424031504260917102804 | 3      |            | NCCOC               |          | ClC(C)=C(C@H)(C)C(O)=O |            | NCC1=CC(F)=CC(C(F)F)F=C1 |          | OC(C)=CSC(C)(C)N1=O    |            | N(C@H)(C)C1=CC=CC=C1 [S] |                      | O=C(O)C1=C(C)OC=C1    |
| 379         | 130424031509260117042803 | 3      |            | NCCOC               |          | ClC(C)=C(C@H)(C)C(O)=O |            | NCC1=CC=C(C(F)F)F=C1     |          | ClC(C)=C(C@H)(C)C(O)=O |            | NCCCN1C=CN=C1            |                      | OC(C@H)(C)Br)=O [R]   |
| 380         | 130424031509260217032806 | 3      |            | NCCOC               |          | ClC(C)=C(C@H)(C)C(O)=O |            | NCC1=CC=C(C(C)F)F=C1     |          | ClC(C)=C(C@H)(C)C(O)=O |            | N(C@H)(C)C1=CC=CC=C1     |                      | OC(C@H)(C)C=O [S]     |
| 381         | 130424031510260317102802 | 3      |            | NCCOC               |          | ClC(C)=C(C@H)(C)C(O)=O |            | CC(C)CCN                 |          | ClC(C)=C(C@H)(C)C(O)=O |            | N(C@H)(C)C1=CC=CC=C1 [S] |                      | ClC1=CC(C(O)=O)=CC=C1 |
| 382         | 130424041503260417092803 | 3      |            | NCC=C               |          | ClC(C)=C(C@H)(C)C(O)=O |            | NCCN(C)=O                |          | OC(C)=CC(C)(CC)C=C1=O  |            | N(C@H)(C)C1=CC=CC=C1 [R] |                      | OC(C@H)(C)C=O [S]     |
| 383         | 130424041504260317102804 | 3      |            | NCC=C               |          | ClC(C)=C(C@H)(C)C(O)=O |            | NCC1=CC=CS1              |          | OC(C)=CC(C)(C)N1=O     |            | N(C@H)(C)C1=CC=CC=C1 [S] |                      | O=C(O)C1=C(C)OC=C1    |
| 384         | 13042404150426071702804  | 3      |            | NCC=C               |          | ClC(C)=C(C@H)(C)C(O)=O |            | NCC1=CC=C(N(C)C)C=C1     |          | OC(C)=CSC(C)(C)N1=O    |            | N(C@H)(C)C1=CC=CC=C1 [S] |                      | O=C(O)C1=C(C)OC=C1    |
| 385         | 130424051501260817102804 | 3      |            | NCC1=CC=C(OC(=O)C)C |          | ClC(C)=C(C@H)(C)C(O)=O |            | NCC1=CC=CC=C1            |          | OC(C)=CC(C)(CC)C=C1=O  |            | N(C@H)(C)C1=CC=CC=C1 [S] |                      | O=C(O)C1=C(C)OC=C1    |
| 386         | 130424051502260917022803 | 3      |            | NCC1=CC=C(OC(=O)C)C |          | ClC(C)=C(C@H)(C)C(O)=O |            | NCC1=CC=CC=C1            |          | OC(C)=CC(C)(CC)C=C1=O  |            | NCCCN1C=CN=C1            |                      | ClC1=CC(C(O)=O)=CC=C1 |
| 387         | 130424051502260717012806 | 3      |            | NCC1=CC=C(OC(=O)C)C |          | ClC(C)=C(C@H)(C)C(O)=O |            | NCC1=CC=C(N(C)C)C=C1     |          | OC(C)=CSC(C)(C)N1=O    |            | N(C@H)(C)C1=CC=CC=C1     |                      | OC(C)=CSC(C)(C)N1=O   |
| 388         | 130424051503260217032803 | 3      |            | NCC1=CC=C(OC(=O)C)C |          | ClC(C)=C(C@H)(C)C(O)=O |            | NCC1=CC=C(S(=O)(=O)C)C=C |          | OC(C)=CC(C)(C)N1=O     |            | NCCCN1C=CN=C1            |                      | OC(C@H)(C)C=O [S]     |
| 389         | 130424051503261017102803 | 3      |            | NCC1=CC=C(OC(=O)C)C |          | ClC(C)=C(C@H)(C)C(O)=O |            | NCC1=CC=C(C)C=C1         |          | ClC(C)=C(C@H)(C)C(O)=O |            | N(C@H)(C)C1=CC=CC=C1 [S] |                      | OC(C@H)(C)C=O [S]     |
| 390         | 130424051509260117092803 | 3      |            | NCC1=CC=C(OC(=O)C)C |          | ClC(C)=C(C@H)(C)C(O)=O |            | NCC1=CC=C(C(C)F)F=C1     |          | ClC(C)=C(C@H)(C)C(O)=O |            | N(C@H)(C)C1=CC=CC=C1 [R] |                      | OC(C@H)(C)C=O [S]     |
| 391         | 130424051509260317022809 | 3      |            | NCC1=CC=C(OC(=O)C)C |          | ClC(C)=C(C@H)(C)C(O)=O |            | NCC1=CC=C(C(C)F)F=C1     |          | ClC(C)=C(C@H)(C)C(O)=O |            | NCC1C1CCCC1              |                      | ClC1=CC(C(O)=O)=CC=C1 |
| 392         | 130424061502260317102804 | 3      |            | NCC1=CC=CO1         |          | ClC(C)=C(C@H)(C)C(O)=O |            | NCC1=CC=CS1              |          | OC(C)=CC(C)(C)N1=O     |            | N(C@H)(C)C1=CC=CC=C1 [S] |                      | O=C(O)C1=C(C)OC=C1    |
| 393         | 130424071501260517012803 | 3      |            | NCC1=CC=C(C)C=C1    |          | ClC(C)=C(C@H)(C)C(O)=O |            | NCC(C)C(O)               |          | OC(C)=CC(C)(CC)C=C1=O  |            | NCCCN1C=CN=C1            |                      | OC(C)=CSC(C)(C)N1=O   |
| 394         | 130424071501260517032809 | 3      |            | NCC1=CC=C(C)C=C1    |          | ClC(C)=C(C@H)(C)C(O)=O |            | NCC(C)C(O)               |          | OC(C)=CC(C)(CC)C=C1=O  |            | NCC1C1CCCC1              |                      | OC(C@H)(C)C=O [S]     |
| 395         | 130424081503260417092804 | 3      |            | N1CCNCCC1           |          | ClC(C)=C(C@H)(C)C(O)=O |            | NCCN(C)=O                |          | OC(C)=CC(C)(CC)C=C1=O  |            | N(C@H)(C)C1=CC=CC=C1 [R] |                      | CC(O)=O               |
| 396         | 130424081503260917032808 | 3      |            | N1CCNCCC1           |          | ClC(C)=C(C@H)(C)C(O)=O |            | NCC1=CC(F)=CC(C(F)F)F=C1 |          | OC(C)=CSC(C)(C)N1=O    |            | BrC1=CC=C(N)C=C1         |                      | OC(C@H)(C)C=O [S]     |
| 397         | 130424081504260417032801 | 3      |            | N1CCNCCC1           |          | ClC(C)=C(C@H)(C)C(O)=O |            | NCCN(C)=O                |          | OC(C)=CC(C)(CC)C=C1=O  |            | NCCCN1C=CN=C2=C2O1       |                      | OC(C@H)(C)C=O [S]     |

| observation | full_mol_code2           | copies | Amines(X1) | Amines(X1):smiles | Acid(X1) | Acid(X1):smiles    | Amines(X2) | Amines(X2):smiles         | Acid(X2) | Acid(X2):smiles    | Amines(X3) | Amines(X3):smiles        | Structure of Pair... | Pair3Acids         |
|-------------|--------------------------|--------|------------|-------------------|----------|--------------------|------------|---------------------------|----------|--------------------|------------|--------------------------|----------------------|--------------------|
| 398         | 130424081510260417022805 | 3      |            | N1CCNCC1          |          | ClC(C)C=C(C)C(=O)O |            | CC(C)CN                   |          | ClC(C)C=C(C)C(=O)O |            | NCC1CC(C)C=CC=C2O1       |                      | ClC(C)C=C(C)C(=O)O |
| 399         | 130424091501260417102804 | 3      |            | NCCCN1C=CN=C1     |          | ClC(C)C=C(C)C(=O)O |            | NCCN(C)C=O                |          | CC(C)=CC(C)C(=O)O  |            | N[C@@H](C)C1=CC=CC=C1[S] |                      | O=C(C)C1=C(C)OC=C1 |
| 400         | 130424091501260917102803 | 3      |            | NCCCN1C=CN=C1     |          | ClC(C)C=C(C)C(=O)O |            | NCC1=C(F)C=C(C)C(F)F=C1   |          | CC(C)=CSC(C)N=O    |            | N[C@@H](C)C1=CC=CC=C1[S] |                      | OC(C)C(=O)C1=O[S]  |
| 401         | 130424091502260217032803 | 3      |            | NCCCN1C=CN=C1     |          | ClC(C)C=C(C)C(=O)O |            | NCC1=CC=C(S(=O)(=O)C)C=C1 |          | CC(C)=COC(C)N=O    |            | NCCCN1C=CN=C1            |                      | OC(C)C(=O)C1=O[S]  |
| 402         | 130424091502260317022803 | 3      |            | NCCCN1C=CN=C1     |          | ClC(C)C=C(C)C(=O)O |            | NCC1=CC=C1                |          | CC(C)=COC(C)N=O    |            | NCCCN1C=CN=C1            |                      | ClC(C)C=C(C)C(=O)O |
| 403         | 130424091502260517092804 | 3      |            | NCCCN1C=CN=C1     |          | ClC(C)C=C(C)C(=O)O |            | NCC(C)C(C)O               |          | CC(C)=CC(C)C(=O)O  |            | N[C@@H](C)C1=CC=CC=C1[R] |                      | CCC(O)O            |
| 404         | 130424091502260817032802 | 3      |            | NCCCN1C=CN=C1     |          | ClC(C)C=C(C)C(=O)O |            | N[C@@H](C)C1=CC=CC=C1     |          | CC(C)=CSC(C)N=O    |            | NCCO                     |                      | OC(C)C(=O)C1=O[S]  |
| 405         | 130424091504260417032804 | 3      |            | NCCCN1C=CN=C1     |          | ClC(C)C=C(C)C(=O)O |            | NCCN(C)C=O                |          | CC(C)=CC(C)C(=O)O  |            | NCC1=CC=CC1              |                      | OC(C)C(=O)C1=O[S]  |
| 406         | 130424091504260517032802 | 3      |            | NCCCN1C=CN=C1     |          | ClC(C)C=C(C)C(=O)O |            | NCC(C)C(O)O               |          | CC(C)=CC(C)C(=O)O  |            | NCCO                     |                      | OC(C)C(=O)C1=O[S]  |
| 407         | 130424091502260317032805 | 3      |            | NCCCN1C=CN=C1     |          | ClC(C)C=C(C)C(=O)O |            | NCC1=CC=C(C(F)F)F=C1      |          | ClC(C)C=C(C)C(=O)O |            | NCC1CC(C)C=CC=C2O1       |                      | OC(C)C(=O)C1=O[S]  |
| 408         | 130424091502260417022810 | 3      |            | NCCCN1C=CN=C1     |          | ClC(C)C=C(C)C(=O)O |            | NCC1=CC=C(C(F)F)F=C1      |          | ClC(C)C=C(C)C(=O)O |            | NCCCN1C=CC(C)OC=C1       |                      | ClC(C)C=C(C)C(=O)O |
| 409         | 130424091502260317032802 | 3      |            | NCCCN1C=CN=C1     |          | ClC(C)C=C(C)C(=O)O |            | CC(C)CN                   |          | ClC(C)C=C(C)C(=O)O |            | NCCO                     |                      | OC(C)C(=O)C1=O[S]  |
| 410         | 130424091502260417032802 | 3      |            | NCCCN1C=CN=C1     |          | ClC(C)C=C(C)C(=O)O |            | CC(C)CN                   |          | ClC(C)C=C(C)C(=O)O |            | NCCO                     |                      | OC(C)C(=O)C1=O[S]  |
| 411         | 130424101501260817032804 | 3      |            | C1CNCCN1          |          | ClC(C)C=C(C)C(=O)O |            | N[C@@H](C)C1=CC=CC=C1     |          | CC(C)=CSC(C)N=O    |            | NCC1=CC=CC1              |                      | OC(C)C(=O)C1=O[S]  |
| 412         | 130424101501261017032809 | 3      |            | C1CNCCN1          |          | ClC(C)C=C(C)C(=O)O |            | NCC1=CC(C)C=C1            |          | ClC(C)C=C(C)C(=O)O |            | NCC1CCOCC1               |                      | OC(C)C(=O)C1=O[S]  |
| 413         | 130424101502260217042809 | 3      |            | C1CNCCN1          |          | ClC(C)C=C(C)C(=O)O |            | NCC1=CC=C(S(=O)(=O)C)C=C1 |          | CC(C)=COC(C)N=O    |            | NCC1CCOCC1               |                      | OC(C)C(=O)C1=O[R]  |
| 414         | 130424101502260417012806 | 3      |            | C1CNCCN1          |          | ClC(C)C=C(C)C(=O)O |            | NCCN(C)C=O                |          | CC(C)=CC(C)C(=O)O  |            | N[C@@H](C)C1=CC=CC=C1    |                      | OC(C)=CSC(C)N=O    |
| 415         | 130424101503260917012803 | 3      |            | C1CNCCN1          |          | ClC(C)C=C(C)C(=O)O |            | NCC1=CC=CC1               |          | CC(C)=CC(C)C(=O)O  |            | NCCCN1C=CN=C1            |                      | OC(C)=CSC(C)N=O    |
| 416         | 130424101504260917022808 | 3      |            | C1CNCCN1          |          | ClC(C)C=C(C)C(=O)O |            | NCC1=CC=CC1               |          | CC(C)=CC(C)C(=O)O  |            | BrC1=CC=C(C)C=C1         |                      | ClC(C)C=C(C)C(=O)O |
| 417         | 130424101504260917032805 | 3      |            | C1CNCCN1          |          | ClC(C)C=C(C)C(=O)O |            | NCC1=CC=CC1               |          | CC(C)=CC(C)C(=O)O  |            | NCC1CC(C)C=CC=C2O1       |                      | OC(C)C(=O)C1=O[S]  |
| 418         | 130424101504260817032802 | 3      |            | C1CNCCN1          |          | ClC(C)C=C(C)C(=O)O |            | N[C@@H](C)C1=CC=CC=C1     |          | CC(C)=CSC(C)N=O    |            | NCCO                     |                      | OC(C)C(=O)C1=O[S]  |
| 419         | 130924021502260717032802 | 3      |            | NCC1CCOCC1        |          | ClC(C)C=C(C)C(=O)O |            | NCC1=CC=C(N)C=C1          |          | CC(C)=CSC(C)N=O    |            | NCCO                     |                      | OC(C)C(=O)C1=O[S]  |
| 420         | 130924021502260717102804 | 3      |            | NCC1CCOCC1        |          | ClC(C)C=C(C)C(=O)O |            | NCC1=CC=C(N)C=C1          |          | CC(C)=CSC(C)N=O    |            | N[C@@H](C)C1=CC=CC=C1[S] |                      | O=C(C)C1=C(C)OC=C1 |
| 421         | 130924021502261017042804 | 3      |            | NCC1CCOCC1        |          | ClC(C)C=C(C)C(=O)O |            | NCC1=CC(C)C=C1            |          | ClC(C)C=C(C)C(=O)O |            | NCC1=CC=CC1              |                      | OC(C)C(=O)C1=O[R]  |
| 422         | 130924021503260417032803 | 3      |            | NCC1CCOCC1        |          | ClC(C)C=C(C)C(=O)O |            | NCCN(C)C=O                |          | CC(C)=CC(C)C(=O)O  |            | NCCCN1C=CN=C1            |                      | OC(C)C(=O)C1=O[S]  |
| 423         | 130924021504260717092804 | 3      |            | NCC1CCOCC1        |          | ClC(C)C=C(C)C(=O)O |            | NCC1=CC=C(N)C=C1          |          | CC(C)=CSC(C)N=O    |            | N[C@@H](C)C1=CC=CC=C1[R] |                      | CCC(O)O            |
| 424         | 130924021504260817102804 | 3      |            | NCC1CCOCC1        |          | ClC(C)C=C(C)C(=O)O |            | N[C@@H](C)C1=CC=CC=C1     |          | CC(C)=CSC(C)N=O    |            | N[C@@H](C)C1=CC=CC=C1[S] |                      | O=C(C)C1=C(C)OC=C1 |
| 425         | 130924021506260417092804 | 3      |            | NCC1CCOCC1        |          | ClC(C)C=C(C)C(=O)O |            | NCC1=CC=C(C(F)F)F=C1      |          | ClC(C)C=C(C)C(=O)O |            | N[C@@H](C)C1=CC=CC=C1[R] |                      | CCC(O)O            |
| 426         | 130924031501260717022802 | 3      |            | NCC1CCOCC1        |          | ClC(C)C=C(C)C(=O)O |            | NCC1=CC=C(N)C=C1          |          | CC(C)=CSC(C)N=O    |            | NCCO                     |                      | ClC(C)C=C(C)C(=O)O |
| 427         | 130924031501260717022804 | 3      |            | NCC1CCOCC1        |          | ClC(C)C=C(C)C(=O)O |            | NCC1=CC=C(N)C=C1          |          | CC(C)=CSC(C)N=O    |            | NCC1=CC=CC1              |                      | ClC(C)C=C(C)C(=O)O |
| 428         | 130924031501260817042803 | 3      |            | NCC1CCOCC1        |          | ClC(C)C=C(C)C(=O)O |            | N[C@@H](C)C1=CC=CC=C1     |          | CC(C)=CSC(C)N=O    |            | NCCCN1C=CN=C1            |                      | OC(C)C(=O)C1=O[R]  |
| 429         | 130924031503260817102804 | 3      |            | NCC1CCOCC1        |          | ClC(C)C=C(C)C(=O)O |            | N[C@@H](C)C1=CC=CC=C1     |          | CC(C)=CSC(C)N=O    |            | N[C@@H](C)C1=CC=CC=C1[S] |                      | O=C(C)C1=C(C)OC=C1 |
| 430         | 130924031504260317102804 | 3      |            | NCC1CCOCC1        |          | ClC(C)C=C(C)C(=O)O |            | NCC1=CC=C1                |          | CC(C)=COC(C)N=O    |            | N[C@@H](C)C1=CC=CC=C1[S] |                      | O=C(C)C1=C(C)OC=C1 |

| observation | full_mol_code2           | copies | Amines(X1) | Amines(X1):smiles    | Acid(X1) | Acid(X1):smiles         | Amines(X2) | Amines(X2):smiles             | Acid(X2) | Acid(X2):smiles         | Amines(X3) | Amines(X3):smiles        | Structure of Pair... | Pair3Acids             |
|-------------|--------------------------|--------|------------|----------------------|----------|-------------------------|------------|-------------------------------|----------|-------------------------|------------|--------------------------|----------------------|------------------------|
| 431         | 130924031504260517032802 | 3      |            | NCCC1COCCOCC1        |          | OC(C1=CSC(C(C)C)=N1)=O  |            | NCC(C)C(O)                    |          | OC(C1=CC=C(C(C)C)=C1)=O |            | NCCO                     |                      | OC(C@H)(C)C(O)=O [S]   |
| 432         | 130924031504260517022803 | 3      |            | NCCC1COCCOCC1        |          | OC(C1=CSC(C(C)C)=N1)=O  |            | N(C@H)(C)C1=CC=CC=C1          |          | OC(C1=CSC(C(C)C)=N1)=O  |            | NCCCN1C=CN=C1            |                      | ClCC1=CC(C)C(O)=O=CC=C |
| 433         | 130924031510260317102802 | 3      |            | NCCC1COCCOCC1        |          | OC(C1=CSC(C(C)C)=N1)=O  |            | CC(C)CCN                      |          | ClC(C)C=C(C@H)(C)C(O)=O |            | N(C@H)(C)C1=CC=CC=C1 [S] |                      | ClCC1=CC(C)C(O)=O=CC=C |
| 434         | 130924041503260317032803 | 3      |            | NCCC1COCCOCC1        |          | ClC(C)C=C(C@H)(C)C(O)=O |            | NCC1=CC=C(S1)                 |          | OC(C1=COO(C(C)C)=N1)=O  |            | NCCCN1C=CN=C1            |                      | OC(C@H)(C)C(O)=O [S]   |
| 435         | 130924041510260117092804 | 3      |            | NCCC1COCCOCC1        |          | ClC(C)C=C(C@H)(C)C(O)=O |            | CC(C)CCN                      |          | ClC(C)C=C(C@H)(C)C(O)=O |            | N(C@H)(C)C1=CC=CC=C1 [R] |                      | CCC(O)=O               |
| 436         | 131024011504260717042803 | 3      |            | NCC1=CC(F)=C(F)C=C1  |          | OC(C1=COC(C(C)C)=N1)=O  |            | NCC1=CC=C(N)C(C)C=C1          |          | OC(C1=CSC(C(C)C)=N1)=O  |            | NCCCN1C=CN=C1            |                      | OC(C@H)(C)C(O)=O [R]   |
| 437         | 131024011510260317102804 | 3      |            | NCC1=CC(F)=C(F)C=C1  |          | OC(C1=COC(C(C)C)=N1)=O  |            | CC(C)CCN                      |          | ClC(C)C=C(C@H)(C)C(O)=O |            | N(C@H)(C)C1=CC=CC=C1 [S] |                      | O=C(O)C1=C(C)C(O)C=C1  |
| 438         | 131024021501260317102804 | 3      |            | NCC1=CC(F)=C(F)C=C1  |          | ClCC1=CC(C)C(O)=O=CC=C1 |            | NCC1=CC=C(S1)                 |          | OC(C1=COO(C(C)C)=N1)=O  |            | N(C@H)(C)C1=CC=CC=C1 [S] |                      | O=C(O)C1=C(C)C(O)C=C1  |
| 439         | 131024021503260417032803 | 3      |            | NCC1=CC(F)=C(F)C=C1  |          | ClCC1=CC(C)C(O)=O=CC=C1 |            | NCCN(C)C=O                    |          | ClC(C)C=C(C)C(O)=O      |            | NCCCN1C=CN=C1            |                      | OC(C@H)(C)C(O)=O [S]   |
| 440         | 131024031501260817032802 | 3      |            | NCC1=CC(F)=C(F)C=C1  |          | OC(C1=CSC(C(C)C)=N1)=O  |            | NCC1=CC=C(C)C=C1              |          | OC(C1=CC=C(C)C(C)C)=O   |            | NCCO                     |                      | OC(C@H)(C)C(O)=O [S]   |
| 441         | 131024031503260717032802 | 3      |            | NCC1=CC(F)=C(F)C=C1  |          | OC(C1=CSC(C(C)C)=N1)=O  |            | NCC1=CC=C(N)C(C)C=C1          |          | OC(C1=CSC(C(C)C)=N1)=O  |            | NCCO                     |                      | OC(C@H)(C)C(O)=O [S]   |
| 442         | 131024031503260817012803 | 3      |            | NCC1=CC(F)=C(F)C=C1  |          | OC(C1=CSC(C(C)C)=N1)=O  |            | N(C@H)(C)C1=CC=CC=C1          |          | OC(C1=CSC(C(C)C)=N1)=O  |            | NCCCN1C=CN=C1            |                      | OC(C1=CSC(C(C)C)=N1)=O |
| 443         | 131024031504260917022804 | 3      |            | NCC1=CC(F)=C(F)C=C1  |          | OC(C1=CSC(C(C)C)=N1)=O  |            | NCC1=CC(F)=CC(C)C(F)C=C1      |          | OC(C1=CSC(C(C)C)=N1)=O  |            | NCC1=CC=CC1              |                      | ClCC1=CC(C)C(O)=O=CC=C |
| 444         | 131024031509260117012803 | 3      |            | NCC1=CC(F)=C(F)C=C1  |          | OC(C1=CSC(C(C)C)=N1)=O  |            | NCC1=CC=C(C)C(F)C=C1          |          | ClC(C)C=C(C@H)(C)C(O)=O |            | NCCCN1C=CN=C1            |                      | OC(C1=CSC(C(C)C)=N1)=O |
| 445         | 131024031509260317032802 | 3      |            | NCC1=CC(F)=C(F)C=C1  |          | OC(C1=CSC(C(C)C)=N1)=O  |            | NCC1=CC=C(C)C(F)C=C1          |          | ClC(C)C=C(C@H)(C)C(O)=O |            | NCCO                     |                      | OC(C@H)(C)C(O)=O [S]   |
| 446         | 131024031510260417102803 | 3      |            | NCC1=CC(F)=C(F)C=C1  |          | OC(C1=CSC(C(C)C)=N1)=O  |            | CC(C)CCN                      |          | ClC(C)C=C(C@H)(C)C(O)=O |            | N(C@H)(C)C1=CC=CC=C1 [S] |                      | OC(C@H)(C)C(O)=O [S]   |
| 447         | 131024041503260417092804 | 3      |            | NCC1=CC(F)=C(F)C=C1  |          | ClC(C)C=C(C@H)(C)C(O)=O |            | NCCN(C)C=O                    |          | OC(C1=CC=C(C)C(C)C)=O   |            | N(C@H)(C)C1=CC=CC=C1 [R] |                      | CCC(O)=O               |
| 448         | 131024041504260717032803 | 3      |            | NCC1=CC(F)=C(F)C=C1  |          | ClC(C)C=C(C@H)(C)C(O)=O |            | N(C@H)(C)C1=CC=CC=C1          |          | OC(C1=CSC(C(C)C)=N1)=O  |            | NCCCN1C=CN=C1            |                      | OC(C@H)(C)C(O)=O [S]   |
| 449         | 130124011503260517102804 | 2      |            | NCC1=CC=C(C)C(Br)=C1 |          | OC(C1=COC(C(C)C)=N1)=O  |            | NCC(C)C(O)                    |          | OC(C1=CC=C(C)C(C)C)=O   |            | N(C@H)(C)C1=CC=CC=C1 [S] |                      | O=C(O)C1=C(C)C(O)C=C1  |
| 450         | 130124011509260317032809 | 2      |            | NCC1=CC=C(C)C(Br)=C1 |          | OC(C1=COC(C(C)C)=N1)=O  |            | NCC1=CC=C(C)C(F)C=C1          |          | ClC(C)C=C(C@H)(C)C(O)=O |            | NCCC1COCCOCC1            |                      | OC(C@H)(C)C(O)=O [S]   |
| 451         | 130124021502260817022804 | 2      |            | NCC1=CC=CN=C1        |          | OC(C1=COC(C(C)C)=N1)=O  |            | N(C@H)(C)C1=CC=CC=C1          |          | OC(C1=CSC(C(C)C)=N1)=O  |            | NCC1=CC=CC1              |                      | ClCC1=CC(C)C(O)=O=CC=C |
| 452         | 130124021503260217092804 | 2      |            | NCC1=CC=CN=C1        |          | OC(C1=COC(C(C)C)=N1)=O  |            | NCC1=CC=C(S(=O)(=O)C)C(O)C=C1 |          | OC(C1=COO(C(C)C)=N1)=O  |            | N(C@H)(C)C1=CC=CC=C1 [R] |                      | CCC(O)=O               |
| 453         | 130124021503261017032801 | 2      |            | NCC1=CC=CN=C1        |          | OC(C1=COC(C(C)C)=N1)=O  |            | NCC1=CC=C(C)C=C1              |          | ClC(C)C=C(C@H)(C)C(O)=O |            | NCCCN1C=CN=C1            |                      | OC(C@H)(C)C(O)=O [S]   |
| 454         | 130124031501260417042809 | 2      |            | NCCCCO               |          | OC(C1=COC(C(C)C)=N1)=O  |            | NCCN(C)C=O                    |          | OC(C1=CC=C(C)C(C)C)=O   |            | NCCC1COCCOCC1            |                      | OC(C@H)(C)C(O)=O [R]   |
| 455         | 130124031501260717032801 | 2      |            | NCCCCO               |          | OC(C1=COC(C(C)C)=N1)=O  |            | NCC1=CC=C(N)C(C)C=C1          |          | OC(C1=CSC(C(C)C)=N1)=O  |            | NCCCN1C=CN=C1            |                      | OC(C@H)(C)C(O)=O [S]   |
| 456         | 130124031501260817022805 | 2      |            | NCCCCO               |          | OC(C1=COC(C(C)C)=N1)=O  |            | N(C@H)(C)C1=CC=CC=C1          |          | OC(C1=CSC(C(C)C)=N1)=O  |            | NCC1=CC=C(C)C(C)C=C2O1   |                      | ClCC1=CC(C)C(O)=O=CC=C |
| 457         | 130124031501260817032802 | 2      |            | NCCCCO               |          | OC(C1=COC(C(C)C)=N1)=O  |            | N(C@H)(C)C1=CC=CC=C1          |          | OC(C1=CSC(C(C)C)=N1)=O  |            | NCCO                     |                      | OC(C@H)(C)C(O)=O [S]   |
| 458         | 130124031501260817032803 | 2      |            | NCCCCO               |          | OC(C1=COC(C(C)C)=N1)=O  |            | N(C@H)(C)C1=CC=CC=C1          |          | OC(C1=CSC(C(C)C)=N1)=O  |            | NCCCN1C=CN=C1            |                      | OC(C@H)(C)C(O)=O [S]   |
| 459         | 130124031501261017042803 | 2      |            | NCCCCO               |          | OC(C1=COC(C(C)C)=N1)=O  |            | NCC1=CC=C(C)C=C1              |          | ClC(C)C=C(C@H)(C)C(O)=O |            | NCCCN1C=CN=C1            |                      | OC(C@H)(C)C(O)=O [R]   |
| 460         | 130124031502260217032802 | 2      |            | NCCCCO               |          | OC(C1=COC(C(C)C)=N1)=O  |            | NCC1=CC=C(S(=O)(=O)C)C(O)C=C1 |          | OC(C1=COO(C(C)C)=N1)=O  |            | NCCO                     |                      | OC(C@H)(C)C(O)=O [S]   |
| 461         | 130124031502261017012805 | 2      |            | NCCCCO               |          | OC(C1=COC(C(C)C)=N1)=O  |            | NCC1=CC=C(C)C=C1              |          | ClC(C)C=C(C@H)(C)C(O)=O |            | NCC1=CC=C(C)C(C)C=C2O1   |                      | OC(C1=CSC(C(C)C)=N1)=O |
| 462         | 130124031503260217032802 | 2      |            | NCCCCO               |          | OC(C1=COC(C(C)C)=N1)=O  |            | NCC1=CC=C(S(=O)(=O)C)C(O)C=C1 |          | OC(C1=COO(C(C)C)=N1)=O  |            | NCCO                     |                      | OC(C@H)(C)C(O)=O [S]   |
| 463         | 130124031503260217102804 | 2      |            | NCCCCO               |          | OC(C1=COC(C(C)C)=N1)=O  |            | NCC1=CC=C(S(=O)(=O)C)C(O)C=C1 |          | OC(C1=COO(C(C)C)=N1)=O  |            | N(C@H)(C)C1=CC=CC=C1 [S] |                      | O=C(O)C1=C(C)C(O)C=C1  |



| observation | full_mol.code2           | copies | Amines(X1) | Amines(X1):smiles    | Acid(X1) | Acid(X1):smiles    | Amines(X2) | Amines(X2):smiles         | Acid(X2) | Acid(X2):smiles            | Amines(X3) | Amines(X3):smiles         | Structure of Pair... | Pair3Acids           |
|-------------|--------------------------|--------|------------|----------------------|----------|--------------------|------------|---------------------------|----------|----------------------------|------------|---------------------------|----------------------|----------------------|
| 464         | 130124031503260417022803 | 2      |            | NCCOC                |          | OC(C1=CC(C)C)=N1=O |            | NCCN(C)=O                 |          | OC(C1=CC(C)C)=N1=O         |            | NCCCN1C=C1                |                      | ClCC1=CC(C1O)=CC=O   |
| 465         | 130124031503260917012803 | 2      |            | NCCOC                |          | OC(C1=CC(C)C)=N1=O |            | NOC1=CC=CC=C1             |          | OC(C1=CC(C)C)=N1=O         |            | NCCCN1C=C1                |                      | OC(C1=CC(C)C)=N1=O   |
| 466         | 130124031503260717032802 | 2      |            | NCCOC                |          | OC(C1=CC(C)C)=N1=O |            | NOC1=CC=C(N(C)C)C=C1      |          | OC(C1=CC(C)C)=N1=O         |            | NCCO                      |                      | OC([C@H](C)Cl)=O [S] |
| 467         | 130124031503260717042803 | 2      |            | NCCOC                |          | OC(C1=CC(C)C)=N1=O |            | NOC1=CC=C(N(C)C)C=C1      |          | OC(C1=CC(C)C)=N1=O         |            | NCCCN1C=C1                |                      | OC([C@H](C)Br)=O [R] |
| 468         | 130124031504260417022810 | 2      |            | NCCOC                |          | OC(C1=CC(C)C)=N1=O |            | NCCN(C)=O                 |          | OC(C1=CC(C)C)=N1=O         |            | NCCCN1=CC=C(C)C(C)C=C1    |                      | ClCC1=CC(C1O)=CC=O   |
| 469         | 130124031504260817102803 | 2      |            | NCCOC                |          | OC(C1=CC(C)C)=N1=O |            | N[C@@H](C)C1=CC=CC=C1     |          | OC(C1=CC(C)C)=N1=O         |            | N[C@@H](C)C1=CC=CC=C1 [S] |                      | OC([C@H](C)Cl)=O [S] |
| 470         | 130124031506260217032808 | 2      |            | NCCOC                |          | OC(C1=CC(C)C)=N1=O |            | NOC1=CC=C(C(F)F)C=C1      |          | ClC(C)=C(C)C([C@H](C)C)C=O |            | BC1=C(C)C(N)C=C1          |                      | OC([C@H](C)Cl)=O [S] |
| 471         | 130124031506260417012804 | 2      |            | NCCOC                |          | OC(C1=CC(C)C)=N1=O |            | NOC1=CC=C(C(F)F)C=C1      |          | ClC(C)=C(C)C([C@H](C)C)C=O |            | NOC1=CC=C1                |                      | OC(C1=CC(C)C)=N1=O   |
| 472         | 130124031506260417022805 | 2      |            | NCCOC                |          | OC(C1=CC(C)C)=N1=O |            | NOC1=CC=C(C(F)F)C=C1      |          | ClC(C)=C(C)C([C@H](C)C)C=O |            | NOC1COC(C=CC=C2)C2O1      |                      | ClCC1=CC(C1O)=CC=O   |
| 473         | 130124041501260517022804 | 2      |            | NCC=C                |          | OC(C1=CC(C)C)=N1=O |            | NCC(C)C=O                 |          | OC(C1=CC(C)C)=N1=O         |            | NOC1=CC=C1                |                      | ClCC1=CC(C1O)=CC=O   |
| 474         | 130124041501260917032805 | 2      |            | NCC=C                |          | OC(C1=CC(C)C)=N1=O |            | NOC1=CC=CC=C1             |          | OC(C1=CC(C)C)=N1=O         |            | NOC1COC(C=CC=C2)C2O1      |                      | OC([C@H](C)Cl)=O [S] |
| 475         | 130124041501260917032807 | 2      |            | NCC=C                |          | OC(C1=CC(C)C)=N1=O |            | N[C@@H](C)C1=CC=CC=C1     |          | OC(C1=CC(C)C)=N1=O         |            | NOC1=CC(C)C(C)C=C1        |                      | OC([C@H](C)Cl)=O [S] |
| 476         | 130124041501260917022809 | 2      |            | NCC=C                |          | OC(C1=CC(C)C)=N1=O |            | NOC1=CC(F)=CC(C(F)F)C=C1  |          | OC(C1=CC(C)C)=N1=O         |            | NOC1COCOC1                |                      | ClCC1=CC(C1O)=CC=O   |
| 477         | 130124041502260417042805 | 2      |            | NCC=C                |          | OC(C1=CC(C)C)=N1=O |            | NCCN(C)=O                 |          | OC(C1=CC(C)C)=N1=O         |            | NOC1COC(C=CC=C2)C2O1      |                      | OC([C@H](C)Br)=O [R] |
| 478         | 130124041502260517022803 | 2      |            | NCC=C                |          | OC(C1=CC(C)C)=N1=O |            | NCC(C)C=O                 |          | OC(C1=CC(C)C)=N1=O         |            | NCCCN1C=C1                |                      | ClCC1=CC(C1O)=CC=O   |
| 479         | 130124041502260917032802 | 2      |            | NCC=C                |          | OC(C1=CC(C)C)=N1=O |            | NOC1=CC=CC=C1             |          | OC(C1=CC(C)C)=N1=O         |            | NCCO                      |                      | OC([C@H](C)Cl)=O [S] |
| 480         | 130124041502260917032802 | 2      |            | NCC=C                |          | OC(C1=CC(C)C)=N1=O |            | NOC1=CC(F)=CC(C(F)F)C=C1  |          | OC(C1=CC(C)C)=N1=O         |            | NCCO                      |                      | OC([C@H](C)Cl)=O [S] |
| 481         | 130124041503260317032802 | 2      |            | NCC=C                |          | OC(C1=CC(C)C)=N1=O |            | NOC1=CC=CS1               |          | OC(C1=CC(C)C)=N1=O         |            | NCCO                      |                      | OC([C@H](C)Cl)=O [S] |
| 482         | 130124041503260917032801 | 2      |            | NCC=C                |          | OC(C1=CC(C)C)=N1=O |            | NOC1=CC=CC=C1             |          | OC(C1=CC(C)C)=N1=O         |            | NCCCN1=CNC2=CC=CC=C2      |                      | OC([C@H](C)Cl)=O [S] |
| 484         | 130124041503260717032806 | 2      |            | NCC=C                |          | OC(C1=CC(C)C)=N1=O |            | NOC1=CC=C(N(C)C)C=C1      |          | OC(C1=CC(C)C)=N1=O         |            | N[C@@H](C)C1=CC=CC=C1     |                      | OC([C@H](C)Cl)=O [S] |
| 485         | 130124041503260817092804 | 2      |            | NCC=C                |          | OC(C1=CC(C)C)=N1=O |            | N[C@@H](C)C1=CC=CC=C1     |          | OC(C1=CC(C)C)=N1=O         |            | N[C@@H](C)C1=CC=CC=C1 [R] |                      | CC(C)O               |
| 486         | 130124041503260917032802 | 2      |            | NCC=C                |          | OC(C1=CC(C)C)=N1=O |            | NOC1=CC(F)=CC(C(F)F)C=C1  |          | OC(C1=CC(C)C)=N1=O         |            | NCCO                      |                      | OC([C@H](C)Cl)=O [S] |
| 487         | 130124041504260417022805 | 2      |            | NCC=C                |          | OC(C1=CC(C)C)=N1=O |            | NCCN(C)=O                 |          | OC(C1=CC(C)C)=N1=O         |            | NOC1COC(C=CC=C2)C2O1      |                      | ClCC1=CC(C1O)=CC=O   |
| 488         | 130124051501260717032802 | 2      |            | NCC1=CC=C(C)C(C)C=C1 |          | OC(C1=CC(C)C)=N1=O |            | NOC1=CC=C(N(C)C)C=C1      |          | OC(C1=CC(C)C)=N1=O         |            | NCCO                      |                      | OC([C@H](C)Cl)=O [S] |
| 489         | 130124051501260917032810 | 2      |            | NCC1=CC=C(C)C(C)C=C1 |          | OC(C1=CC(C)C)=N1=O |            | NOC1=CC(F)=CC(C(F)F)C=C1  |          | OC(C1=CC(C)C)=N1=O         |            | NCCCN1=CC=C(C)C(C)C=C1    |                      | OC([C@H](C)Cl)=O [S] |
| 490         | 130124051501261017032809 | 2      |            | NCC1=CC=C(C)C(C)C=C1 |          | OC(C1=CC(C)C)=N1=O |            | NOC1=CC=C(C)C=C1          |          | ClC(C)=C(C)C([C@H](C)C)C=O |            | NOC1COCOC1                |                      | OC([C@H](C)Cl)=O [S] |
| 491         | 130124051502260217102802 | 2      |            | NCC1=CC=C(C)C(C)C=C1 |          | OC(C1=CC(C)C)=N1=O |            | NOC1=CC=C(S(=O)(=O)C)C=C1 |          | OC(C1=CC(C)C)=N1=O         |            | N[C@@H](C)C1=CC=CC=C1 [S] |                      | ClCC1=CC(C1O)=CC=O   |
| 492         | 130124051502260317032806 | 2      |            | NCC1=CC=C(C)C(C)C=C1 |          | OC(C1=CC(C)C)=N1=O |            | NOC1=CC=CS1               |          | OC(C1=CC(C)C)=N1=O         |            | N[C@@H](C)C1=CC=CC=C1     |                      | OC([C@H](C)Cl)=O [S] |
| 493         | 130124051502260317042804 | 2      |            | NCC1=CC=C(C)C(C)C=C1 |          | OC(C1=CC(C)C)=N1=O |            | NOC1=CC=CS1               |          | OC(C1=CC(C)C)=N1=O         |            | NOC1=CC=C1                |                      | OC([C@H](C)Br)=O [R] |
| 494         | 130124051502260517032802 | 2      |            | NCC1=CC=C(C)C(C)C=C1 |          | OC(C1=CC(C)C)=N1=O |            | NCC(C)C=O                 |          | OC(C1=CC(C)C)=N1=O         |            | NCCO                      |                      | OC([C@H](C)Cl)=O [S] |
| 495         | 130124051502260917032802 | 2      |            | NCC1=CC=C(C)C(C)C=C1 |          | OC(C1=CC(C)C)=N1=O |            | NOC1=CC=CC=C1             |          | OC(C1=CC(C)C)=N1=O         |            | NCCO                      |                      | OC([C@H](C)Cl)=O [S] |
| 496         | 130124051502260717102802 | 2      |            | NCC1=CC=C(C)C(C)C=C1 |          | OC(C1=CC(C)C)=N1=O |            | NOC1=CC=C(N(C)C)C=C1      |          | OC(C1=CC(C)C)=N1=O         |            | N[C@@H](C)C1=CC=CC=C1 [S] |                      | ClCC1=CC(C1O)=CC=O   |
| 497         | 130124051502261017092804 | 2      |            | NCC1=CC=C(C)C(C)C=C1 |          | OC(C1=CC(C)C)=N1=O |            | NOC1=CC=C(C)C=C1          |          | ClC(C)=C(C)C([C@H](C)C)C=O |            | N[C@@H](C)C1=CC=CC=C1 [R] |                      | CC(C)O               |

| observation | full_mol_code2           | copies | Amines(X1) | Amines(X1):smiles | Acid(X1) | Acid(X1):smiles         | Amines(X2) | Amines(X2):smiles         | Acid(X2) | Acid(X2):smiles                 | Amines(X3) | Amines(X3):smiles        | Structure of Pair... | Pair3Acids             |
|-------------|--------------------------|--------|------------|-------------------|----------|-------------------------|------------|---------------------------|----------|---------------------------------|------------|--------------------------|----------------------|------------------------|
| 498         | 130124051503260317102804 | 2      |            | NCC1=CC=C(O)C=C1  |          | OC(C1=CC=C(C(=O)N)=O)=O |            | NCC1=CC=C(S1)             |          | OC(C1=CC=C(C(=O)N)=O)=O         |            | N[C@@H](C)C1=CC=CC=C1[S] |                      | OC(C)C1=C(C)C(=O)C=C1  |
| 499         | 130124051503260417022809 | 2      |            | NCC1=CC=C(O)C=C1  |          | OC(C1=CC=C(C(=O)N)=O)=O |            | NCCN(C)C=O                |          | OC(C1=CC=C(C(=O)N)=O)=O         |            | NCC1COCC1                |                      | ClCC1=CC(C(=O)O)=O=CC= |
| 500         | 130124051504260417042809 | 2      |            | NCC1=CC=C(O)C=C1  |          | OC(C1=CC=C(C(=O)N)=O)=O |            | NCCN(C)C=O                |          | OC(C1=CC=C(C(=O)N)=O)=O         |            | NCC1COCC1                |                      | OC([C@@H](C)Br)=O [R]  |
| 501         | 130124051504260817032802 | 2      |            | NCC1=CC=C(O)C=C1  |          | OC(C1=CC=C(C(=O)N)=O)=O |            | N[C@@H](C)C1=CC=CC=C1     |          | OC(C1=CC=C(C(=O)N)=O)=O         |            | NCCO                     |                      | OC([C@@H](C)O)=O [S]   |
| 502         | 130124051504260917022803 | 2      |            | NCC1=CC=C(O)C=C1  |          | OC(C1=CC=C(C(=O)N)=O)=O |            | NCC1=CC(F)=CC(C(F)F)F=C1  |          | OC(C1=CC=C(C(=O)N)=O)=O         |            | NCCCN1C=CN=C1            |                      | ClCC1=CC(C(=O)O)=O=CC= |
| 503         | 130124051506260117042801 | 2      |            | NCC1=CC=C(O)C=C1  |          | OC(C1=CC=C(C(=O)N)=O)=O |            | NCC1=CC=C(C(F)F)F=C1      |          | ClC(C)C=C(C)C([C@@H](C)C)C(O)=O |            | NCCCN1C=CN2=CC=CC=C21    |                      | OC([C@@H](C)Br)=O [R]  |
| 504         | 130124051506260217022808 | 2      |            | NCC1=CC=C(O)C=C1  |          | OC(C1=CC=C(C(=O)N)=O)=O |            | NCC1=CC=C(C(F)F)F=C1      |          | ClC(C)C=C(C)C([C@@H](C)C)C(O)=O |            | BC1=C(C)C(C)N=C1         |                      | ClCC1=CC(C(=O)O)=O=CC= |
| 505         | 130124051506260317032802 | 2      |            | NCC1=CC=C(O)C=C1  |          | OC(C1=CC=C(C(=O)N)=O)=O |            | NCC1=CC=C(C(F)F)F=C1      |          | ClC(C)C=C(C)C([C@@H](C)C)C(O)=O |            | NCCO                     |                      | OC([C@@H](C)O)=O [S]   |
| 506         | 130124051506260317012801 | 2      |            | NCC1=CC=C(O)C=C1  |          | OC(C1=CC=C(C(=O)N)=O)=O |            | NCC1=CC=C(C(F)F)F=C1      |          | ClC(C)C=C(C)C([C@@H](C)C)C(O)=O |            | NCCCN1C=CN2=CC=CC=C21    |                      | OC(C1=C(C(=O)N)=O)=O   |
| 507         | 130124051506260417012804 | 2      |            | NCC1=CC=C(O)C=C1  |          | OC(C1=CC=C(C(=O)N)=O)=O |            | NCC1=CC=C(C(F)F)F=C1      |          | ClC(C)C=C(C)C([C@@H](C)C)C(O)=O |            | NCC1=CC=CC1              |                      | OC(C1=C(C(=O)N)=O)=O   |
| 508         | 130124051510260117012803 | 2      |            | NCC1=CC=C(O)C=C1  |          | OC(C1=CC=C(C(=O)N)=O)=O |            | CC(C)CCN                  |          | ClC(C)C=C(C)C([C@@H](C)C)C(O)=O |            | NCCCN1C=CN=C1            |                      | OC(C1=C(C(=O)N)=O)=O   |
| 509         | 130124051510260117102804 | 2      |            | NCC1=CC=C(O)C=C1  |          | OC(C1=CC=C(C(=O)N)=O)=O |            | CC(C)CCN                  |          | ClC(C)C=C(C)C([C@@H](C)C)C(O)=O |            | N[C@@H](C)C1=CC=CC=C1[S] |                      | O=C(O)C1=C(C)C(=O)C=C1 |
| 511         | 130124061502260317022803 | 2      |            | NCC1=CC=C(O)C=C1  |          | OC(C1=CC=C(C(=O)N)=O)=O |            | NCC1=CC=C(S1)             |          | OC(C1=CC=C(C(=O)N)=O)=O         |            | NCCCN1C=CN=C1            |                      | ClCC1=CC(C(=O)O)=O=CC= |
| 512         | 130124061502260617022803 | 2      |            | NCC1=CC=C(O)C=C1  |          | OC(C1=CC=C(C(=O)N)=O)=O |            | NCC1=CC=CC=C1             |          | OC(C1=CC=C(C(=O)N)=O)=O         |            | NCCCN1C=CN=C1            |                      | ClCC1=CC(C(=O)O)=O=CC= |
| 513         | 130124061502260717102803 | 2      |            | NCC1=CC=C(O)C=C1  |          | OC(C1=CC=C(C(=O)N)=O)=O |            | NCC1=CC=C(N(C)C)C=C1      |          | OC(C1=CC=C(C(=O)N)=O)=O         |            | N[C@@H](C)C1=CC=CC=C1[S] |                      | OC([C@@H](C)O)=O [S]   |
| 514         | 130124061504260417092804 | 2      |            | NCC1=CC=C(O)C=C1  |          | OC(C1=CC=C(C(=O)N)=O)=O |            | NCCN(C)C=O                |          | OC(C1=CC=C(C(=O)N)=O)=O         |            | N[C@@H](C)C1=CC=CC=C1[R] |                      | CCC(O)=O               |
| 515         | 130124061506260317022803 | 2      |            | NCC1=CC=C(O)C=C1  |          | OC(C1=CC=C(C(=O)N)=O)=O |            | NCC1=CC=C(C(F)F)F=C1      |          | ClC(C)C=C(C)C([C@@H](C)C)C(O)=O |            | NCCCN1C=CN=C1            |                      | ClCC1=CC(C(=O)O)=O=CC= |
| 516         | 130124071501260217032805 | 2      |            | NCC1=CC=C(O)C=C1  |          | OC(C1=CC=C(C(=O)N)=O)=O |            | NCC1=CC=C(S(=O)(=O)C)C=C1 |          | OC(C1=CC=C(C(=O)N)=O)=O         |            | NCC1COCC(C)C=CC2=C21     |                      | OC([C@@H](C)O)=O [S]   |
| 517         | 130124071501260317012810 | 2      |            | NCC1=CC=C(O)C=C1  |          | OC(C1=CC=C(C(=O)N)=O)=O |            | NCC1=CC=C(S1)             |          | OC(C1=CC=C(C(=O)N)=O)=O         |            | NCCCN1C=CC(C)C(=O)C=C1   |                      | OC(C1=C(C(=O)N)=O)=O   |
| 518         | 130124071501260317092803 | 2      |            | NCC1=CC=C(O)C=C1  |          | OC(C1=CC=C(C(=O)N)=O)=O |            | NCC1=CC=C(S1)             |          | OC(C1=CC=C(C(=O)N)=O)=O         |            | N[C@@H](C)C1=CC=CC=C1[R] |                      | OC([C@@H](C)O)=O [S]   |
| 519         | 130124071501260417032802 | 2      |            | NCC1=CC=C(O)C=C1  |          | OC(C1=CC=C(C(=O)N)=O)=O |            | NCCN(C)C=O                |          | OC(C1=CC=C(C(=O)N)=O)=O         |            | NCCO                     |                      | OC([C@@H](C)O)=O [S]   |
| 520         | 130124071501260517102802 | 2      |            | NCC1=CC=C(O)C=C1  |          | OC(C1=CC=C(C(=O)N)=O)=O |            | NCC(C)C(O)C               |          | OC(C1=CC=C(C(=O)N)=O)=O         |            | N[C@@H](C)C1=CC=CC=C1[S] |                      | ClCC1=CC(C(=O)O)=O=CC= |
| 521         | 130124071501260717022807 | 2      |            | NCC1=CC=C(O)C=C1  |          | OC(C1=CC=C(C(=O)N)=O)=O |            | NCC1=CC=C(N(C)C)C=C1      |          | OC(C1=CC=C(C(=O)N)=O)=O         |            | NCC1=CC(C)C(=O)C(=O)C=C1 |                      | ClCC1=CC(C(=O)O)=O=CC= |
| 522         | 130124071501260717042804 | 2      |            | NCC1=CC=C(O)C=C1  |          | OC(C1=CC=C(C(=O)N)=O)=O |            | NCC1=CC=C(N(C)C)C=C1      |          | OC(C1=CC=C(C(=O)N)=O)=O         |            | NCC1=CC=CC1              |                      | OC([C@@H](C)Br)=O [R]  |
| 523         | 130124071501260817022803 | 2      |            | NCC1=CC=C(O)C=C1  |          | OC(C1=CC=C(C(=O)N)=O)=O |            | N[C@@H](C)C1=CC=CC=C1     |          | OC(C1=CC=C(C(=O)N)=O)=O         |            | NCCCN1C=CN=C1            |                      | ClCC1=CC(C(=O)O)=O=CC= |
| 524         | 130124071501260817032802 | 2      |            | NCC1=CC=C(O)C=C1  |          | OC(C1=CC=C(C(=O)N)=O)=O |            | N[C@@H](C)C1=CC=CC=C1     |          | OC(C1=CC=C(C(=O)N)=O)=O         |            | NCCO                     |                      | OC([C@@H](C)O)=O [S]   |
| 525         | 130124071501261017012801 | 2      |            | NCC1=CC=C(O)C=C1  |          | OC(C1=CC=C(C(=O)N)=O)=O |            | NCC1=CC=C(C)C=C1          |          | ClC(C)C=C(C)C([C@@H](C)C)C(O)=O |            | NCCCN1C=CN2=CC=CC=C21    |                      | OC(C1=C(C(=O)N)=O)=O   |
| 526         | 130124071501261017092804 | 2      |            | NCC1=CC=C(O)C=C1  |          | OC(C1=CC=C(C(=O)N)=O)=O |            | NCC1=CC=C(C)C=C1          |          | ClC(C)C=C(C)C([C@@H](C)C)C(O)=O |            | N[C@@H](C)C1=CC=CC=C1[R] |                      | CCC(O)=O               |
| 527         | 130124071502260317032801 | 2      |            | NCC1=CC=C(O)C=C1  |          | OC(C1=CC=C(C(=O)N)=O)=O |            | NCC1=CC=C(S1)             |          | OC(C1=CC=C(C(=O)N)=O)=O         |            | NCCCN1C=CN=C1            |                      | OC([C@@H](C)O)=O [S]   |
| 528         | 130124071502260417022805 | 2      |            | NCC1=CC=C(O)C=C1  |          | OC(C1=CC=C(C(=O)N)=O)=O |            | NCCN(C)C=O                |          | OC(C1=CC=C(C(=O)N)=O)=O         |            | NCC1COCC(C)C=CC2=C21     |                      | ClCC1=CC(C(=O)O)=O=CC= |
| 529         | 130124071502260517042803 | 2      |            | NCC1=CC=C(O)C=C1  |          | OC(C1=CC=C(C(=O)N)=O)=O |            | NCC(C)C(O)C               |          | OC(C1=CC=C(C(=O)N)=O)=O         |            | NCCCN1C=CN=C1            |                      | OC([C@@H](C)Br)=O [R]  |
| 530         | 130124071502260617032806 | 2      |            | NCC1=CC=C(O)C=C1  |          | OC(C1=CC=C(C(=O)N)=O)=O |            | NCC1=CC=CC=C1             |          | OC(C1=CC=C(C(=O)N)=O)=O         |            | N[C@@H](C)C1=CC=CC=C1    |                      | OC([C@@H](C)O)=O [S]   |
| 531         | 130124071502260817022802 | 2      |            | NCC1=CC=C(O)C=C1  |          | OC(C1=CC=C(C(=O)N)=O)=O |            | N[C@@H](C)C1=CC=CC=C1     |          | OC(C1=CC=C(C(=O)N)=O)=O         |            | NCCO                     |                      | ClCC1=CC(C(=O)O)=O=CC= |

| observation | full_mol_code2           | copies | Amines(X1) | Amines(X1):smiles | Acid(X1) | Acid(X1):smiles         | Amines(X2) | Amines(X2):smiles       | Acid(X2) | Acid(X2):smiles            | Amines(X3) | Amines(X3):smiles           | Structure of Pair... | Pair3Acids                 |
|-------------|--------------------------|--------|------------|-------------------|----------|-------------------------|------------|-------------------------|----------|----------------------------|------------|-----------------------------|----------------------|----------------------------|
| 532         | 130124071502261017032805 | 2      |            | NCC1=CC=C(C)C=C1  |          | OC(C1=CC=C(C)C=C1)=N1=O |            | NCC1=CC=C(C)C=C1        |          | ClC(C)C=C(C)C=C1           |            | NCC1=CC=C(C)C=C1            |                      | OC(C@H)(C)C=O [S]          |
| 533         | 130124071503260317022808 | 2      |            | NCC1=CC=C(C)C=C1  |          | OC(C1=CC=C(C)C=C1)=N1=O |            | NCC1=CC=C(C)C=C1        |          | OC(C1=CC=C(C)C=C1)=N1=O    |            | BrC1=CC=C(C)C=C1            |                      | ClC1=CC(C)C=O)=CC=C1       |
| 534         | 130124071503260517032802 | 2      |            | NCC1=CC=C(C)C=C1  |          | OC(C1=CC=C(C)C=C1)=N1=O |            | NCC1=CC=C(C)C=C1        |          | OC(C1=CC=C(C)C=C1)=N1=O    |            | NCCO                        |                      | OC(C@H)(C)C=O [S]          |
| 535         | 130124071503260817062804 | 2      |            | NCC1=CC=C(C)C=C1  |          | OC(C1=CC=C(C)C=C1)=N1=O |            | NCC1=CC=C(C)C=C1        |          | OC(C1=C(C)C=C(C)C=C1)=N1=O |            | N(C@H)(C)C1=CC=C(C)C=C1 [R] |                      | CC(C)=O                    |
| 536         | 130124071503260817032802 | 2      |            | NCC1=CC=C(C)C=C1  |          | OC(C1=CC=C(C)C=C1)=N1=O |            | N(C@H)(C)C1=CC=C(C)C=C1 |          | OC(C1=C(C)C=C(C)C=C1)=N1=O |            | NCCO                        |                      | OC(C@H)(C)C=O [S]          |
| 537         | 130124071503260817032804 | 2      |            | NCC1=CC=C(C)C=C1  |          | OC(C1=CC=C(C)C=C1)=N1=O |            | N(C@H)(C)C1=CC=C(C)C=C1 |          | OC(C1=C(C)C=C(C)C=C1)=N1=O |            | NCC1=CC=C(C)C=C1            |                      | OC(C@H)(C)C=O [S]          |
| 538         | 130124071503260917012805 | 2      |            | NCC1=CC=C(C)C=C1  |          | OC(C1=CC=C(C)C=C1)=N1=O |            | NCC1=CC=C(C)C=C1        |          | OC(C1=C(C)C=C(C)C=C1)=N1=O |            | NCC1=CC=C(C)C=C1            |                      | OC(C1=C(C)C=C(C)C=C1)=N1=O |
| 539         | 13012407150326091702804  | 2      |            | NCC1=CC=C(C)C=C1  |          | OC(C1=CC=C(C)C=C1)=N1=O |            | NCC1=CC=C(C)C=C1        |          | OC(C1=C(C)C=C(C)C=C1)=N1=O |            | N(C@H)(C)C1=CC=C(C)C=C1 [S] |                      | O=C(O)C1=C(C)C=C(C)C=C1    |
| 540         | 130124071504260317032802 | 2      |            | NCC1=CC=C(C)C=C1  |          | OC(C1=CC=C(C)C=C1)=N1=O |            | NCC1=CC=C(C)C=C1        |          | OC(C1=CC=C(C)C=C1)=N1=O    |            | NCCO                        |                      | OC(C@H)(C)C=O [S]          |
| 541         | 130124071504260817032802 | 2      |            | NCC1=CC=C(C)C=C1  |          | OC(C1=CC=C(C)C=C1)=N1=O |            | N(C@H)(C)C1=CC=C(C)C=C1 |          | OC(C1=C(C)C=C(C)C=C1)=N1=O |            | NCCO                        |                      | OC(C@H)(C)C=O [S]          |
| 542         | 130124071504260817032807 | 2      |            | NCC1=CC=C(C)C=C1  |          | OC(C1=CC=C(C)C=C1)=N1=O |            | N(C@H)(C)C1=CC=C(C)C=C1 |          | OC(C1=C(C)C=C(C)C=C1)=N1=O |            | NCC1=CC=C(C)C=C1            |                      | OC(C@H)(C)C=O [S]          |
| 543         | 130124071506260917012803 | 2      |            | NCC1=CC=C(C)C=C1  |          | OC(C1=CC=C(C)C=C1)=N1=O |            | NCC1=CC=C(C)C=C1        |          | ClC(C)C=C(C)C=C1           |            | NCCN(C)=C=C1                |                      | OC(C1=C(C)C=C(C)C=C1)=N1=O |
| 544         | 130124071506260917012807 | 2      |            | NCC1=CC=C(C)C=C1  |          | OC(C1=CC=C(C)C=C1)=N1=O |            | NCC1=CC=C(C)C=C1        |          | ClC(C)C=C(C)C=C1           |            | NCC1=CC=C(C)C=C1            |                      | OC(C1=C(C)C=C(C)C=C1)=N1=O |
| 545         | 130124071506260917032807 | 2      |            | NCC1=CC=C(C)C=C1  |          | OC(C1=CC=C(C)C=C1)=N1=O |            | NCC1=CC=C(C)C=C1        |          | ClC(C)C=C(C)C=C1           |            | NCC1=CC=C(C)C=C1            |                      | OC(C@H)(C)C=O [S]          |
| 546         | 130124071506260917032802 | 2      |            | NCC1=CC=C(C)C=C1  |          | OC(C1=CC=C(C)C=C1)=N1=O |            | NCC1=CC=C(C)C=C1        |          | ClC(C)C=C(C)C=C1           |            | NCCO                        |                      | OC(C@H)(C)C=O [S]          |
| 547         | 130124071506260917022807 | 2      |            | NCC1=CC=C(C)C=C1  |          | OC(C1=CC=C(C)C=C1)=N1=O |            | NCC1=CC=C(C)C=C1        |          | ClC(C)C=C(C)C=C1           |            | NCC1=CC=C(C)C=C1            |                      | ClC1=CC(C)C=O)=CC=C1       |
| 548         | 130124071506260917032802 | 2      |            | NCC1=CC=C(C)C=C1  |          | OC(C1=CC=C(C)C=C1)=N1=O |            | NCC1=CC=C(C)C=C1        |          | ClC(C)C=C(C)C=C1           |            | NCCO                        |                      | OC(C@H)(C)C=O [S]          |
| 549         | 130124071506260917032809 | 2      |            | NCC1=CC=C(C)C=C1  |          | OC(C1=CC=C(C)C=C1)=N1=O |            | NCC1=CC=C(C)C=C1        |          | ClC(C)C=C(C)C=C1           |            | NCC1=CC=C(C)C=C1            |                      | OC(C@H)(C)C=O [S]          |
| 550         | 130124071510260917032801 | 2      |            | NCC1=CC=C(C)C=C1  |          | OC(C1=CC=C(C)C=C1)=N1=O |            | CC(C)CCN                |          | ClC(C)C=C(C)C=C1           |            | NCC1=CC=C(C)C=C1            |                      | OC(C@H)(C)C=O [S]          |
| 551         | 130124071510260917032809 | 2      |            | NCC1=CC=C(C)C=C1  |          | OC(C1=CC=C(C)C=C1)=N1=O |            | CC(C)CCN                |          | ClC(C)C=C(C)C=C1           |            | NCC1=CC=C(C)C=C1            |                      | OC(C@H)(C)C=O [S]          |
| 552         | 130124071510260917032803 | 2      |            | NCC1=CC=C(C)C=C1  |          | OC(C1=CC=C(C)C=C1)=N1=O |            | CC(C)CCN                |          | ClC(C)C=C(C)C=C1           |            | NCCN(C)=C=C1                |                      | OC(C@H)(C)C=O [S]          |
| 553         | 130124081501260417042803 | 2      |            | N1CCNCC1          |          | OC(C1=CC=C(C)C=C1)=N1=O |            | NCCN(C)C=O              |          | OC(C1=CC=C(C)C=C1)=N1=O    |            | NCCN(C)=C=C1                |                      | OC(C@H)(C)C=O [R]          |
| 554         | 130124081501260517022809 | 2      |            | N1CCNCC1          |          | OC(C1=CC=C(C)C=C1)=N1=O |            | NCC(C)C(O)C             |          | OC(C1=C(C)C=C(C)C=C1)=N1=O |            | NCC1=CC=C(C)C=C1            |                      | ClC1=CC(C)C=O)=CC=C1       |
| 555         | 130124081501260617012803 | 2      |            | N1CCNCC1          |          | OC(C1=CC=C(C)C=C1)=N1=O |            | NCC1=CC=C(C)C=C1        |          | OC(C1=CC=C(C)C=C1)=N1=O    |            | NCCN(C)=C=C1                |                      | OC(C1=C(C)C=C(C)C=C1)=N1=O |
| 556         | 130124081502260117012804 | 2      |            | N1CCNCC1          |          | OC(C1=CC=C(C)C=C1)=N1=O |            | NCCOC                   |          | OC(C1=CC=C(C)C=C1)=N1=O    |            | NCC1=CC=C(C)C=C1            |                      | OC(C1=C(C)C=C(C)C=C1)=N1=O |
| 557         | 130124081502260217032802 | 2      |            | N1CCNCC1          |          | OC(C1=CC=C(C)C=C1)=N1=O |            | NCC1=CC=C(C)C=C1        |          | OC(C1=CC=C(C)C=C1)=N1=O    |            | NCCO                        |                      | OC(C@H)(C)C=O [S]          |
| 558         | 13012408150226041702804  | 2      |            | N1CCNCC1          |          | OC(C1=CC=C(C)C=C1)=N1=O |            | NCCN(C)C=O              |          | OC(C1=C(C)C=C(C)C=C1)=N1=O |            | N(C@H)(C)C1=CC=C(C)C=C1 [S] |                      | O=C(O)C1=C(C)C=C(C)C=C1    |
| 559         | 130124081502260617032806 | 2      |            | N1CCNCC1          |          | OC(C1=CC=C(C)C=C1)=N1=O |            | NCC1=CC=C(C)C=C1        |          | OC(C1=C(C)C=C(C)C=C1)=N1=O |            | N(C@H)(C)C1=CC=C(C)C=C1     |                      | OC(C@H)(C)C=O [S]          |
| 560         | 130124081502260817022802 | 2      |            | N1CCNCC1          |          | OC(C1=CC=C(C)C=C1)=N1=O |            | N(C@H)(C)C1=CC=C(C)C=C1 |          | OC(C1=C(C)C=C(C)C=C1)=N1=O |            | NCCO                        |                      | ClC1=CC(C)C=O)=CC=C1       |
| 561         | 130124081502260917042804 | 2      |            | N1CCNCC1          |          | OC(C1=CC=C(C)C=C1)=N1=O |            | NCC1=CC=C(C)C=C1        |          | OC(C1=C(C)C=C(C)C=C1)=N1=O |            | NCC1=CC=C(C)C=C1            |                      | OC(C@H)(C)C=O [R]          |
| 562         | 130124081503260417032805 | 2      |            | N1CCNCC1          |          | OC(C1=CC=C(C)C=C1)=N1=O |            | NCCN(C)C=O              |          | ClC(C)C=C(C)C=C1           |            | NCC1=CC=C(C)C=C1            |                      | OC(C@H)(C)C=O [S]          |
| 563         | 13012408150326051702804  | 2      |            | N1CCNCC1          |          | OC(C1=CC=C(C)C=C1)=N1=O |            | NCC1=CC=C(C)C=C1        |          | OC(C1=C(C)C=C(C)C=C1)=N1=O |            | N(C@H)(C)C1=CC=C(C)C=C1 [S] |                      | O=C(O)C1=C(C)C=C(C)C=C1    |
| 564         | 130124081503260717012803 | 2      |            | N1CCNCC1          |          | OC(C1=CC=C(C)C=C1)=N1=O |            | NCC1=CC=C(C)C=C1        |          | OC(C1=C(C)C=C(C)C=C1)=N1=O |            | NCCN(C)=C=C1                |                      | OC(C1=C(C)C=C(C)C=C1)=N1=O |



| observation | full_mol_code2           | copies | Amines(X1) | Amines(X1):smiles | Acid(X1) | Acid(X1):smiles     | Amines(X2) | Amines(X2):smiles         | Acid(X2) | Acid(X2):smiles         | Amines(X3) | Amines(X3):smiles        | Structure of Pair... | Pair3Acids            |
|-------------|--------------------------|--------|------------|-------------------|----------|---------------------|------------|---------------------------|----------|-------------------------|------------|--------------------------|----------------------|-----------------------|
| 565         | 130124081503260717022803 | 2      |            | N1CCNCCC1         |          | OC(C1=CO(C)C2)=N1=O |            | NCC1=CC=C(N(C)C)C=C1      |          | OC(C1=CSC(C)C)=N1=O     |            | NCCCN1C=CN=C1            |                      | ClCC1=CC(C1O)=O+CC=O  |
| 566         | 130124081503260717022805 | 2      |            | N1CCNCCC1         |          | OC(C1=CO(C)C2)=N1=O |            | NCC1=CC=C(N(C)C)C=C1      |          | OC(C1=CSC(C)C)=N1=O     |            | NCC1COO(C=C=CC=C2)C2O1   |                      | OC([C@H](C)C)=O [S]   |
| 567         | 130124081503260817022809 | 2      |            | N1CCNCCC1         |          | OC(C1=CO(C)C2)=N1=O |            | N[C@@H](C)C1=CC=CC=C1     |          | OC(C1=CSC(C)C)=N1=O     |            | NCC1COCCC1               |                      | ClCC1=CC(C1O)=O+CC=O  |
| 568         | 130124081504260117032801 | 2      |            | N1CCNCCC1         |          | OC(C1=CO(C)C2)=N1=O |            | NCOC                      |          | OC(C1=CO(C)C2)=N1=O     |            | NCCCN1C=CN=C1            |                      | OC([C@H](C)C)=O [S]   |
| 569         | 130124081504260217032802 | 2      |            | N1CCNCCC1         |          | OC(C1=CO(C)C2)=N1=O |            | NCC1=CC=C(S(=O)(=O)C)C=C1 |          | OC(C1=CSC(C)C)=N1=O     |            | NCOO                     |                      | OC([C@H](C)C)=O [S]   |
| 570         | 130124081504260217092804 | 2      |            | N1CCNCCC1         |          | OC(C1=CO(C)C2)=N1=O |            | NCC1=CC=C(S(=O)(=O)C)C=C1 |          | OC(C1=CSC(C)C)=N1=O     |            | N[C@@H](C)C1=CC=CC=C1[R] |                      | CC(O)=O               |
| 571         | 130124081504260417012807 | 2      |            | N1CCNCCC1         |          | OC(C1=CO(C)C2)=N1=O |            | NCOC(C)=O                 |          | OC(C1=CC=C(C)C)C=C1=O   |            | NCC1=C(C)C=CC(OC)C=C1    |                      | OC(C1=CSC(C)C)=N1+O   |
| 572         | 130124081504260417032801 | 2      |            | N1CCNCCC1         |          | OC(C1=CO(C)C2)=N1=O |            | NCOC(C)=O                 |          | OC(C1=CC=C(C)C)C=C1=O   |            | NCCCN1C=CN=C1            |                      | OC([C@H](C)C)=O [S]   |
| 573         | 130124081504260517032802 | 2      |            | N1CCNCCC1         |          | OC(C1=CO(C)C2)=N1=O |            | NCOC(C)O                  |          | OC(C1=CC=C(C)C)C=C1=O   |            | NCOO                     |                      | OC([C@H](C)C)=O [S]   |
| 574         | 130124081504260517092804 | 2      |            | N1CCNCCC1         |          | OC(C1=CO(C)C2)=N1=O |            | NCOC(C)O                  |          | OC(C1=CC=C(C)C)C=C1=O   |            | N[C@@H](C)C1=CC=CC=C1[R] |                      | CC(O)=O               |
| 575         | 130124081504260917032806 | 2      |            | N1CCNCCC1         |          | OC(C1=CO(C)C2)=N1=O |            | N[C@@H](C)C1=CC=CC=C1     |          | OC(C1=CSC(C)C)=N1=O     |            | N[C@@H](C)C1=CC=CC=C1    |                      | OC([C@H](C)C)=O [S]   |
| 576         | 130124081506260217102803 | 2      |            | N1CCNCCC1         |          | OC(C1=CO(C)C2)=N1=O |            | NCC1=CC=C(C)C(F)F=C1      |          | ClC(C)=C(C)C@H(C)C(O)=O |            | N[C@@H](C)C1=CC=CC=C1[S] |                      | OC([C@H](C)C)=O [S]   |
| 577         | 130124081506260317012808 | 2      |            | N1CCNCCC1         |          | OC(C1=CO(C)C2)=N1=O |            | NCC1=CC=C(C)C(F)F=C1      |          | ClC(C)=C(C)C@H(C)C(O)=O |            | BC1=CC=C(C)N(C)C=C1      |                      | OC(C1=CSC(C)C)=N1+O   |
| 578         | 130124081510260117012809 | 2      |            | N1CCNCCC1         |          | OC(C1=CO(C)C2)=N1=O |            | CC(C)CCN                  |          | ClC(C)=C(C)C@H(C)C(O)=O |            | NCC1COCCC1               |                      | OC(C1=CSC(C)C)=N1+O   |
| 579         | 130124081510260317032808 | 2      |            | N1CCNCCC1         |          | OC(C1=CO(C)C2)=N1=O |            | CC(C)CCN                  |          | ClC(C)=C(C)C@H(C)C(O)=O |            | BC1=CC=C(C)N(C)C=C1      |                      | OC([C@H](C)C)=O [S]   |
| 580         | 130124081510260317102801 | 2      |            | N1CCNCCC1         |          | OC(C1=CO(C)C2)=N1=O |            | CC(C)CCN                  |          | ClC(C)=C(C)C@H(C)C(O)=O |            | N[C@@H](C)C1=CC=CC=C1[S] |                      | OC(C1=CSC(C)C)=N1+O   |
| 581         | 130124081510260317102803 | 2      |            | N1CCNCCC1         |          | OC(C1=CO(C)C2)=N1=O |            | CC(C)CCN                  |          | ClC(C)=C(C)C@H(C)C(O)=O |            | N[C@@H](C)C1=CC=CC=C1[S] |                      | OC([C@H](C)C)=O [S]   |
| 582         | 130124081510260417012805 | 2      |            | N1CCNCCC1         |          | OC(C1=CO(C)C2)=N1=O |            | CC(C)CCN                  |          | ClC(C)=C(C)C@H(C)C(O)=O |            | NCC1COO(C=C=CC=C2)C2O1   |                      | OC(C1=CSC(C)C)=N1+O   |
| 583         | 130124091501260417032807 | 2      |            | NCCCN1C=CN=C1     |          | OC(C1=CO(C)C2)=N1=O |            | NCOC(C)=O                 |          | OC(C1=CC=C(C)C)C=C1=O   |            | NCC1=CC=C(C)C(OC)C=C1    |                      | OC([C@H](C)C)=O [S]   |
| 584         | 130124091501260817022810 | 2      |            | NCCCN1C=CN=C1     |          | OC(C1=CO(C)C2)=N1=O |            | N[C@@H](C)C1=CC=CC=C1     |          | OC(C1=CSC(C)C)=N1=O     |            | NCCCN1C=CC(OC)C=C1       |                      | ClCC1=CC(C1O)=O+CC=O  |
| 585         | 130124091501260917092804 | 2      |            | NCCCN1C=CN=C1     |          | OC(C1=CO(C)C2)=N1=O |            | NCC1=CC=C(F)C(C)C(F)F=C1  |          | OC(C1=CSC(C)C)=N1=O     |            | N[C@@H](C)C1=CC=CC=C1[R] |                      | CC(O)=O               |
| 586         | 130124091502260217022809 | 2      |            | NCCCN1C=CN=C1     |          | OC(C1=CO(C)C2)=N1=O |            | NCC1=CC=C(S(=O)(=O)C)C=C1 |          | OC(C1=CO(C)C2)=N1=O     |            | NCC1COCCC1               |                      | ClCC1=CC(C1O)=O+CC=O  |
| 587         | 130124091502260317022806 | 2      |            | NCCCN1C=CN=C1     |          | OC(C1=CO(C)C2)=N1=O |            | NCC1=CC=C(S1)C=C1         |          | OC(C1=CSC(C)C)=N1=O     |            | N[C@@H](C)C1=CC=CC=C1    |                      | ClCC1=CC(C1O)=O+CC=O  |
| 588         | 130124091502260317032803 | 2      |            | NCCCN1C=CN=C1     |          | OC(C1=CO(C)C2)=N1=O |            | NCC1=CC=C(S1)C=C1         |          | OC(C1=CO(C)C2)=N1=O     |            | NCCCN1C=CN=C1            |                      | OC([C@H](C)C)=O [S]   |
| 589         | 130124091502260417042809 | 2      |            | NCCCN1C=CN=C1     |          | OC(C1=CO(C)C2)=N1=O |            | NCOC(C)=O                 |          | OC(C1=CC=C(C)C)C=C1=O   |            | NCC1COCCC1               |                      | OC([C@H](C)C)Br+O [R] |
| 590         | 130124091502260917032803 | 2      |            | NCCCN1C=CN=C1     |          | OC(C1=CO(C)C2)=N1=O |            | NCC1=CC=C(C)C=C1          |          | OC(C1=CC=C(C)C)C=C1=O   |            | NCCCN1C=CN=C1            |                      | OC([C@H](C)C)=O [S]   |
| 591         | 130124091502260717032810 | 2      |            | NCCCN1C=CN=C1     |          | OC(C1=CO(C)C2)=N1=O |            | NCC1=CC=C(N(C)C)C=C1      |          | OC(C1=CSC(C)C)=N1=O     |            | NCCCN1C=CC(OC)C=C1       |                      | OC([C@H](C)C)=O [S]   |
| 592         | 130124091502260817042806 | 2      |            | NCCCN1C=CN=C1     |          | OC(C1=CO(C)C2)=N1=O |            | N[C@@H](C)C1=CC=CC=C1     |          | OC(C1=CSC(C)C)=N1=O     |            | N[C@@H](C)C1=CC=CC=C1    |                      | OC([C@H](C)C)Br+O [R] |
| 593         | 130124091503260917032802 | 2      |            | NCCCN1C=CN=C1     |          | OC(C1=CO(C)C2)=N1=O |            | NCC1=CC=C(C)C=C1          |          | OC(C1=CC=C(C)C)C=C1=O   |            | NCOO                     |                      | OC([C@H](C)C)=O [S]   |
| 594         | 130124091504260417032810 | 2      |            | NCCCN1C=CN=C1     |          | OC(C1=CO(C)C2)=N1=O |            | NCOC(C)=O                 |          | OC(C1=CC=C(C)C)C=C1=O   |            | NCCCN1C=CC(OC)C=C1       |                      | OC([C@H](C)C)=O [S]   |
| 595         | 130124091504260517032804 | 2      |            | NCCCN1C=CN=C1     |          | OC(C1=CO(C)C2)=N1=O |            | NCOC(C)O                  |          | OC(C1=CC=C(C)C)C=C1=O   |            | NCC1=CC=C(C)C=C1         |                      | OC([C@H](C)C)=O [S]   |
| 596         | 130124091504260517032808 | 2      |            | NCCCN1C=CN=C1     |          | OC(C1=CO(C)C2)=N1=O |            | NCOC(C)O                  |          | OC(C1=CC=C(C)C)C=C1=O   |            | BC1=CC=C(C)N(C)C=C1      |                      | OC([C@H](C)C)=O [S]   |
| 597         | 130124091506260417012805 | 2      |            | NCCCN1C=CN=C1     |          | OC(C1=CO(C)C2)=N1=O |            | NCC1=CC=C(C)C(F)F=C1      |          | ClC(C)=C(C)C@H(C)C(O)=O |            | NCC1COO(C=C=CC=C2)C2O1   |                      | OC(C1=CSC(C)C)=N1+O   |

| observation | full_mol_code2           | copies | Amines(X1) | Amines(X1):smiles | Acid(X1) | Acid(X1):smiles     | Amines(X2) | Amines(X2):smiles        | Acid(X2) | Acid(X2):smiles          | Amines(X3) | Amines(X3):smiles         | Structure of Pair... | Pair3Acids          |
|-------------|--------------------------|--------|------------|-------------------|----------|---------------------|------------|--------------------------|----------|--------------------------|------------|---------------------------|----------------------|---------------------|
| 598         | 130124091510260117022809 | 2      |            | NCCCN1C=CN=C1     |          | OC(C1=COO(C2)=N1)=O |            | CC(C)CCN                 |          | ClC(C)=C(C)C@H(C)C(C)O=O |            | NCC1COCCC1                |                      | ClCC1=CC(C1O)=CC=O  |
| 599         | 130124101501260117032801 | 2      |            | C1CNCCN1          |          | OC(C1=COO(C2)=N1)=O |            | NCCOC                    |          | OC(C1=COO(C2)=N1)=O      |            | NCCCN1C=CN=C21            |                      | OC(C@H(C)C)O=O [S]  |
| 600         | 130124101501260217032802 | 2      |            | C1CNCCN1          |          | OC(C1=COO(C2)=N1)=O |            | NCC1=CC=C(S(=O)(=O)C)C=O |          | OC(C1=COO(C2)=N1)=O      |            | NCCO                      |                      | OC(C@H(C)C)O=O [S]  |
| 601         | 130124101501260217032804 | 2      |            | C1CNCCN1          |          | OC(C1=COO(C2)=N1)=O |            | NCC1=CC=C(S(=O)(=O)C)C=O |          | OC(C1=COO(C2)=N1)=O      |            | NCC1=CC=C1                |                      | OC(C@H(C)C)O=O [S]  |
| 602         | 130124101501260317102804 | 2      |            | C1CNCCN1          |          | OC(C1=COO(C2)=N1)=O |            | NCC1=CC=C1               |          | OC(C1=COO(C2)=N1)=O      |            | N[C@@H](C)C1=CC=CC=C1 [S] |                      | O=C(O)C1=C(C)OC=C1  |
| 603         | 130124101501260317032801 | 2      |            | C1CNCCN1          |          | OC(C1=COO(C2)=N1)=O |            | NCC1=CC=C1               |          | OC(C1=CC=C(C)C)C=O       |            | NCCCN1C=CN=C21            |                      | OC(C@H(C)C)O=O [S]  |
| 604         | 130124101501260317042807 | 2      |            | C1CNCCN1          |          | OC(C1=COO(C2)=N1)=O |            | NCC1=CC=C1               |          | OC(C1=CC=C(C)C)C=O       |            | NCC1=CC=C(C)C=O           |                      | OC(C@H(C)C)Br=O [R] |
| 605         | 130124101501261017032809 | 2      |            | C1CNCCN1          |          | OC(C1=COO(C2)=N1)=O |            | NCC1=CC=C(C)C=O          |          | ClC(C)=C(C)C@H(C)C(C)O=O |            | NCC1COCCC1                |                      | OC(C@H(C)C)O=O [S]  |
| 606         | 130124101502260217022805 | 2      |            | C1CNCCN1          |          | OC(C1=COO(C2)=N1)=O |            | NCC1=CC=C(S(=O)(=O)C)C=O |          | OC(C1=COO(C2)=N1)=O      |            | NCC1COO(C)C=CC=C21        |                      | ClCC1=CC(C1O)=CC=O  |
| 607         | 130124101502260217022803 | 2      |            | C1CNCCN1          |          | OC(C1=COO(C2)=N1)=O |            | NCC1=CC=C(S(=O)(=O)C)C=O |          | OC(C1=COO(C2)=N1)=O      |            | N[C@@H](C)C1=CC=CC=C1 [R] |                      | OC(C@H(C)C)O=O [S]  |
| 608         | 130124101502260317022803 | 2      |            | C1CNCCN1          |          | OC(C1=COO(C2)=N1)=O |            | NCC1=CC=C1               |          | OC(C1=CC=C(C)C)C=O       |            | N[C@@H](C)C1=CC=CC=C1 [R] |                      | OC(C@H(C)C)O=O [S]  |
| 609         | 130124101502260317032805 | 2      |            | C1CNCCN1          |          | OC(C1=COO(C2)=N1)=O |            | N[C@@H](C)C1=CC=CC=C1    |          | OC(C1=COO(C2)=N1)=O      |            | NCC1COO(C)C=CC=C21        |                      | OC(C@H(C)C)O=O [S]  |
| 610         | 130124101503260417012804 | 2      |            | C1CNCCN1          |          | OC(C1=COO(C2)=N1)=O |            | NCCN(C)C=O               |          | OC(C1=CC=C(C)C)C=O       |            | NCC1=CC=C1                |                      | OC(C1=CSC(C)C)N1=O  |
| 611         | 130124101503260417042803 | 2      |            | C1CNCCN1          |          | OC(C1=COO(C2)=N1)=O |            | NCC1=CC=C(N(C)C)C=O      |          | OC(C1=CSC(C)C)N1=O       |            | NCCCN1C=CN=C1             |                      | OC(C@H(C)C)Br=O [R] |
| 612         | 130124101503260917032803 | 2      |            | C1CNCCN1          |          | OC(C1=COO(C2)=N1)=O |            | NCC1=CC(F)=CC(C(F)F)F=C1 |          | OC(C1=CSC(C)C)N1=O       |            | NCCCN1C=CN=C1             |                      | OC(C@H(C)C)O=O [S]  |
| 613         | 130124101503260917032804 | 2      |            | C1CNCCN1          |          | OC(C1=COO(C2)=N1)=O |            | NCC1=CC(F)=CC(C(F)F)F=C1 |          | OC(C1=CSC(C)C)N1=O       |            | NCC1=CC=C1                |                      | OC(C@H(C)C)O=O [S]  |
| 614         | 130124101504260317012809 | 2      |            | C1CNCCN1          |          | OC(C1=COO(C2)=N1)=O |            | NCC1=CC=C1               |          | OC(C1=COO(C2)=N1)=O      |            | NCC1COCCC1                |                      | OC(C1=CSC(C)C)N1=O  |
| 615         | 130124101504260317032802 | 2      |            | C1CNCCN1          |          | OC(C1=COO(C2)=N1)=O |            | NCC(C)C=O                |          | OC(C1=CC=C(C)C)C=O       |            | NCCO                      |                      | OC(C@H(C)C)O=O [S]  |
| 616         | 130124101504260317032802 | 2      |            | C1CNCCN1          |          | OC(C1=COO(C2)=N1)=O |            | NCC1=CC=C1               |          | OC(C1=CC=C(C)C)C=O       |            | NCCO                      |                      | OC(C@H(C)C)O=O [S]  |
| 617         | 130124101504260917032803 | 2      |            | C1CNCCN1          |          | OC(C1=COO(C2)=N1)=O |            | NCC1=CC(F)=CC(C(F)F)F=C1 |          | OC(C1=CSC(C)C)N1=O       |            | NCCCN1C=CN=C1             |                      | OC(C@H(C)C)O=O [S]  |
| 618         | 130124101504261017032805 | 2      |            | C1CNCCN1          |          | OC(C1=COO(C2)=N1)=O |            | NCC1=CC=C(C)C=O          |          | ClC(C)=C(C)C@H(C)C(C)O=O |            | NCC1COO(C)C=CC=C21        |                      | OC(C@H(C)C)O=O [S]  |
| 619         | 130124101506260317012804 | 2      |            | C1CNCCN1          |          | OC(C1=COO(C2)=N1)=O |            | NCC1=CC=C(C)C=O          |          | ClC(C)=C(C)C@H(C)C(C)O=O |            | NCC1=CC=C1                |                      | OC(C1=CSC(C)C)N1=O  |
| 620         | 130124101506260417012809 | 2      |            | C1CNCCN1          |          | OC(C1=COO(C2)=N1)=O |            | NCC1=CC=C(C)C=O          |          | ClC(C)=C(C)C@H(C)C(C)O=O |            | NCC1COCCC1                |                      | OC(C1=CSC(C)C)N1=O  |
| 621         | 130124101506260317032809 | 2      |            | C1CNCCN1          |          | OC(C1=COO(C2)=N1)=O |            | NCC1=CC=C(C)C=O          |          | ClC(C)=C(C)C@H(H)C(C)O=O |            | NCC1COCCC1                |                      | OC(C@H(C)C)O=O [S]  |
| 622         | 130124101510260317012809 | 2      |            | C1CNCCN1          |          | OC(C1=COO(C2)=N1)=O |            | CC(C)CCN                 |          | ClC(C)=C(C)C@H(H)C(C)O=O |            | NCC1COCCC1                |                      | OC(C1=CSC(C)C)N1=O  |
| 623         | 130124101510260317022802 | 2      |            | C1CNCCN1          |          | OC(C1=COO(C2)=N1)=O |            | CC(C)CCN                 |          | ClC(C)=C(C)C@H(H)C(C)O=O |            | N[C@@H](C)C1=CC=CC=C1 [R] |                      | ClCC1=CC(C1O)=CC=O  |
| 624         | 130224011502260717032810 | 2      |            | NCC1=CC=C(C)C=O   |          | ClCC1=CC(C1O)=CC=C1 |            | NCC1=CC=C1               |          | OC(C1=CC=C(C)C)C=O       |            | NCCCN1C=CN=C1             |                      | OC(C@H(C)C)O=O [S]  |
| 625         | 130224011502260717032803 | 2      |            | NCC1=CC=C(C)C=O   |          | ClCC1=CC(C1O)=CC=C1 |            | NCC1=CC=C(N(C)C)C=O      |          | OC(C1=CSC(C)C)N1=O       |            | NCCCN1C=CN=C1             |                      | OC(C@H(C)C)O=O [S]  |
| 626         | 130224011504260817022803 | 2      |            | NCC1=CC=C(C)C=O   |          | ClCC1=CC(C1O)=CC=C1 |            | N[C@@H](C)C1=CC=CC=C1    |          | OC(C1=CSC(C)C)N1=O       |            | NCCCN1C=CN=C1             |                      | ClCC1=CC(C1O)=CC=O  |
| 627         | 130224021501260417022803 | 2      |            | NCC1=CC=C1        |          | ClCC1=CC(C1O)=CC=C1 |            | NCCN(C)C=O               |          | OC(C1=CC=C(C)C)C=O       |            | N[C@@H](C)C1=CC=CC=C1 [R] |                      | OC(C@H(C)C)O=O [S]  |
| 628         | 130224021501260717012803 | 2      |            | NCC1=CC=C1        |          | ClCC1=CC(C1O)=CC=C1 |            | NCC1=CC=C(N(C)C)C=O      |          | OC(C1=CSC(C)C)N1=O       |            | NCCCN1C=CN=C1             |                      | OC(C1=CSC(C)C)N1=O  |
| 629         | 130224021502260417102804 | 2      |            | NCC1=CC=C1        |          | ClCC1=CC(C1O)=CC=C1 |            | NCCN(C)C=O               |          | OC(C1=CC=C(C)C)C=O       |            | N[C@@H](C)C1=CC=CC=C1 [S] |                      | O=C(O)C1=C(C)OC=C1  |
| 630         | 130224021502260517022804 | 2      |            | NCC1=CC=C1        |          | ClCC1=CC(C1O)=CC=C1 |            | NCC(C)C=O                |          | OC(C1=CC=C(C)C)C=O       |            | N[C@@H](C)C1=CC=CC=C1 [R] |                      | CC(C)O=O            |

| observation | full_mol_code2           | copies | Amines(X1) | Amines(X1):smiles | Acid(X1) | Acid(X1):smiles     | Amines(X2) | Amines(X2):smiles         | Acid(X2) | Acid(X2):smiles | Amines(X3) | Amines(X3):smiles         | Structure of Pair... | Pair3Acids          |
|-------------|--------------------------|--------|------------|-------------------|----------|---------------------|------------|---------------------------|----------|-----------------|------------|---------------------------|----------------------|---------------------|
| 631         | 130224021503260217032802 | 2      |            | NCC1=CC=C(N)C=C1  |          | ClC(=O)C(Cl)=O=C=C1 |            | NCC1=CC=C(S(=O)(=O)C)C=C1 |          | OC(=O)C(Cl)=O   |            | NCCO                      |                      | OC(Cl)C(Cl)=O [S]   |
| 632         | 130224021510260117102804 | 2      |            | NCC1=CC=C(N)C=C1  |          | ClC(=O)C(Cl)=O=C=C1 |            | CC(C)CCN                  |          | ClC(=O)C(Cl)=O  |            | N(C)C@H(C)C1=CC=CC=C1 [S] |                      | O=C(O)C1=C(Cl)OC=C1 |
| 633         | 130224031501260317022803 | 2      |            | NCCOCC            |          | ClC(=O)C(Cl)=O=C=C1 |            | NCC1=CC=C(S1)C=C1         |          | OC(=O)C(Cl)=O   |            | NCCCN1C=CN=C1             |                      | ClC(=O)C(Cl)=O=C=C1 |
| 634         | 130224031501260317032804 | 2      |            | NCCOCC            |          | ClC(=O)C(Cl)=O=C=C1 |            | NCC1=CC=C(S1)C=C1         |          | OC(=O)C(Cl)=O   |            | NCC1=CC=C(O1)C=C1         |                      | OC(Cl)C(Cl)=O [S]   |
| 635         | 130224031501260417032802 | 2      |            | NCCOCC            |          | ClC(=O)C(Cl)=O=C=C1 |            | NCCN(C)C=O                |          | OC(=O)C(Cl)=O   |            | NCCO                      |                      | OC(Cl)C(Cl)=O [S]   |
| 636         | 130224031501260817012805 | 2      |            | NCCOCC            |          | ClC(=O)C(Cl)=O=C=C1 |            | NCC1=CC=C(C=C1)C=C1       |          | OC(=O)C(Cl)=O   |            | NCC1COC(C)C=CC2=C2O1      |                      | OC(=O)C(Cl)=O       |
| 637         | 130224031501260717032802 | 2      |            | NCCOCC            |          | ClC(=O)C(Cl)=O=C=C1 |            | NCC1=CC=C(N(C)C)C=C1      |          | OC(=O)C(Cl)=O   |            | NCCO                      |                      | OC(Cl)C(Cl)=O [S]   |
| 638         | 130224031501261017022810 | 2      |            | NCCOCC            |          | ClC(=O)C(Cl)=O=C=C1 |            | NCC1=CC=C(C)C=C1          |          | ClC(=O)C(Cl)=O  |            | NCC1=CC=C(C)C=C1          |                      | ClC(=O)C(Cl)=O=C=C1 |
| 639         | 130224031502260717032802 | 2      |            | NCCOCC            |          | ClC(=O)C(Cl)=O=C=C1 |            | NCC1=CC=C(N(C)C)C=C1      |          | OC(=O)C(Cl)=O   |            | NCCO                      |                      | OC(Cl)C(Cl)=O [S]   |
| 640         | 130224031503260717032801 | 2      |            | NCCOCC            |          | ClC(=O)C(Cl)=O=C=C1 |            | NCC1=CC=C(N(C)C)C=C1      |          | OC(=O)C(Cl)=O   |            | NCC1=CNC2=CC=CC=C2        |                      | OC(Cl)C(Cl)=O [S]   |
| 641         | 130224031503260817042803 | 2      |            | NCCOCC            |          | ClC(=O)C(Cl)=O=C=C1 |            | N(C)C@H(C)C1=CC=CC=C1     |          | OC(=O)C(Cl)=O   |            | NCCCN1C=CN=C1             |                      | OC(Cl)C(Cl)=O [R]   |
| 642         | 130224031504260317032802 | 2      |            | NCCOCC            |          | ClC(=O)C(Cl)=O=C=C1 |            | NCC1=CC=C(S1)C=C1         |          | OC(=O)C(Cl)=O   |            | NCCO                      |                      | OC(Cl)C(Cl)=O [S]   |
| 643         | 130224031504260417022810 | 2      |            | NCCOCC            |          | ClC(=O)C(Cl)=O=C=C1 |            | NCCN(C)C=O                |          | OC(=O)C(Cl)=O   |            | NCC1=CC=C(C)C=C1          |                      | ClC(=O)C(Cl)=O=C=C1 |
| 644         | 130224031506260217102801 | 2      |            | NCCOCC            |          | ClC(=O)C(Cl)=O=C=C1 |            | NCC1=CC=C(C(F)F)C=C1      |          | ClC(=O)C(Cl)=O  |            | N(C)C@H(C)C1=CC=CC=C1 [S] |                      | OC(=O)C(Cl)=O       |
| 645         | 130224031506260317032805 | 2      |            | NCCOCC            |          | ClC(=O)C(Cl)=O=C=C1 |            | NCC1=CC=C(C(F)F)C=C1      |          | ClC(=O)C(Cl)=O  |            | NCC1COC(C)C=CC2=C2O1      |                      | OC(Cl)C(Cl)=O [S]   |
| 646         | 130224031506260417092803 | 2      |            | NCCOCC            |          | ClC(=O)C(Cl)=O=C=C1 |            | NCC1=CC=C(C(F)F)C=C1      |          | ClC(=O)C(Cl)=O  |            | N(C)C@H(C)C1=CC=CC=C1 [R] |                      | OC(Cl)C(Cl)=O [S]   |
| 647         | 130224041501260417012809 | 2      |            | NCC=C             |          | ClC(=O)C(Cl)=O=C=C1 |            | NCCN(C)C=O                |          | OC(=O)C(Cl)=O   |            | NCC1COCOC1                |                      | OC(=O)C(Cl)=O       |
| 648         | 130224041502260217032802 | 2      |            | NCC=C             |          | ClC(=O)C(Cl)=O=C=C1 |            | NCC1=CC=C(S(=O)(=O)C)C=C1 |          | OC(=O)C(Cl)=O   |            | NCCO                      |                      | OC(Cl)C(Cl)=O [S]   |
| 649         | 130224041502260317032804 | 2      |            | NCC=C             |          | ClC(=O)C(Cl)=O=C=C1 |            | NCC1=CC=C(S1)C=C1         |          | OC(=O)C(Cl)=O   |            | NCC1=CC=C(O1)C=C1         |                      | OC(Cl)C(Cl)=O [S]   |
| 650         | 130224041502260417022803 | 2      |            | NCC=C             |          | ClC(=O)C(Cl)=O=C=C1 |            | NCCN(C)C=O                |          | OC(=O)C(Cl)=O   |            | NCCCN1C=CN=C1             |                      | ClC(=O)C(Cl)=O=C=C1 |
| 651         | 130224041502260817012809 | 2      |            | NCC=C             |          | ClC(=O)C(Cl)=O=C=C1 |            | NCC1=CC=C(C=C1)C=C1       |          | OC(=O)C(Cl)=O   |            | NCC1COCOC1                |                      | OC(=O)C(Cl)=O       |
| 652         | 130224041502260717032805 | 2      |            | NCC=C             |          | ClC(=O)C(Cl)=O=C=C1 |            | NCC1=CC=C(N(C)C)C=C1      |          | OC(=O)C(Cl)=O   |            | NCC1COC(C)C=CC2=C2O1      |                      | OC(Cl)C(Cl)=O [S]   |
| 653         | 130224041503260217102803 | 2      |            | NCC=C             |          | ClC(=O)C(Cl)=O=C=C1 |            | NCC1=CC=C(S(=O)(=O)C)C=C1 |          | OC(=O)C(Cl)=O   |            | N(C)C@H(C)C1=CC=CC=C1 [S] |                      | OC(Cl)C(Cl)=O [S]   |
| 654         | 130224041503260317102804 | 2      |            | NCC=C             |          | ClC(=O)C(Cl)=O=C=C1 |            | NCC1=CC=C(S1)C=C1         |          | OC(=O)C(Cl)=O   |            | N(C)C@H(C)C1=CC=CC=C1 [S] |                      | O=C(O)C1=C(Cl)OC=C1 |
| 655         | 130224041503261017032803 | 2      |            | NCC=C             |          | ClC(=O)C(Cl)=O=C=C1 |            | NCC1=CC=C(C)C=C1          |          | ClC(=O)C(Cl)=O  |            | NCCCN1C=CN=C1             |                      | OC(Cl)C(Cl)=O [S]   |
| 656         | 130224041504260517032802 | 2      |            | NCC=C             |          | ClC(=O)C(Cl)=O=C=C1 |            | NCC(C)C(O)C               |          | OC(=O)C(Cl)=O   |            | NCCO                      |                      | OC(Cl)C(Cl)=O [S]   |
| 657         | 130224041506260317022807 | 2      |            | NCC=C             |          | ClC(=O)C(Cl)=O=C=C1 |            | NCC1=CC=C(C(F)F)C=C1      |          | ClC(=O)C(Cl)=O  |            | NCC1=CC=C(C)C=C1          |                      | ClC(=O)C(Cl)=O=C=C1 |
| 658         | 130224041506260417022803 | 2      |            | NCC=C             |          | ClC(=O)C(Cl)=O=C=C1 |            | NCC1=CC=C(C(F)F)C=C1      |          | ClC(=O)C(Cl)=O  |            | NCCCN1C=CN=C1             |                      | ClC(=O)C(Cl)=O=C=C1 |
| 659         | 130224041510260217092803 | 2      |            | NCC=C             |          | ClC(=O)C(Cl)=O=C=C1 |            | CC(C)CCN                  |          | ClC(=O)C(Cl)=O  |            | N(C)C@H(C)C1=CC=CC=C1 [R] |                      | OC(Cl)C(Cl)=O [S]   |
| 660         | 130224041510260317022809 | 2      |            | NCC=C             |          | ClC(=O)C(Cl)=O=C=C1 |            | CC(C)CCN                  |          | ClC(=O)C(Cl)=O  |            | NCC1COCOC1                |                      | ClC(=O)C(Cl)=O=C=C1 |
| 661         | 130224041510260417032804 | 2      |            | NCC=C             |          | ClC(=O)C(Cl)=O=C=C1 |            | CC(C)CCN                  |          | ClC(=O)C(Cl)=O  |            | NCC1=CC=C(O1)C=C1         |                      | OC(Cl)C(Cl)=O [S]   |
| 662         | 130224041510260417032810 | 2      |            | NCC=C             |          | ClC(=O)C(Cl)=O=C=C1 |            | CC(C)CCN                  |          | ClC(=O)C(Cl)=O  |            | NCC1=CC=C(C)C=C1          |                      | OC(Cl)C(Cl)=O [S]   |
| 663         | 130224051501260817022803 | 2      |            | NCC1=CC=C(C)C=C1  |          | ClC(=O)C(Cl)=O=C=C1 |            | N(C)C@H(C)C1=CC=CC=C1     |          | OC(=O)C(Cl)=O   |            | NCCCN1C=CN=C1             |                      | ClC(=O)C(Cl)=O=C=C1 |

| observation | full_mol_code2           | copies | Amines(X1) | Amines(X1):smiles    | Acid(X1) | Acid(X1):smiles        | Amines(X2) | Amines(X2):smiles         | Acid(X2) | Acid(X2):smiles            | Amines(X3) | Amines(X3):smiles         | Structure of Pair... | Pair3Acids              |
|-------------|--------------------------|--------|------------|----------------------|----------|------------------------|------------|---------------------------|----------|----------------------------|------------|---------------------------|----------------------|-------------------------|
| 664         | 130224051501260817022804 | 2      |            | NCC1=CC=C(O)C(O)C=C1 |          | ClCC1=CC(C(=O)O)=CC=C1 |            | N[C@@H](C)C1=CC=CC=C1     |          | OC(C1=CSC(C(=O)O)=N1)=O    |            | NCC1=CC=C(O)C=C1          |                      | ClCC1=CC(C(=O)O)=CC=C1  |
| 665         | 130224051502260317032802 | 2      |            | NCC1=CC=C(O)C(O)C=C1 |          | ClCC1=CC(C(=O)O)=CC=C1 |            | NCC1=CC=C(S1)C=C1         |          | OC(C1=CC(C(=O)O)=N1)=O     |            | NCCO                      |                      | OC([C@@H](C)Cl)=O [S]   |
| 666         | 130224051502260317032809 | 2      |            | NCC1=CC=C(O)C(O)C=C1 |          | ClCC1=CC(C(=O)O)=CC=C1 |            | NCC1=CC=C(S1)C=C1         |          | OC(C1=CC(C(=O)O)=N1)=O     |            | NCC1COCCO1                |                      | OC([C@@H](C)Cl)=O [S]   |
| 667         | 130224051502260417042808 | 2      |            | NCC1=CC=C(O)C(O)C=C1 |          | ClCC1=CC(C(=O)O)=CC=C1 |            | NCCN(C)C=O                |          | OC(C1=CC(C(=O)O)=N1)=O     |            | BrC1=CC=C(C)C=C1          |                      | OC([C@@H](C)Br)=O [R]   |
| 668         | 130224051502260517092804 | 2      |            | NCC1=CC=C(O)C(O)C=C1 |          | ClCC1=CC(C(=O)O)=CC=C1 |            | NCC(C)C(O)C               |          | OC(C1=CC(C(=O)O)=N1)=O     |            | N[C@@H](C)C1=CC=CC=C1 [R] |                      | CCC(O)=O                |
| 669         | 130224051502260817012803 | 2      |            | NCC1=CC=C(O)C(O)C=C1 |          | ClCC1=CC(C(=O)O)=CC=C1 |            | N[C@@H](C)C1=CC=CC=C1     |          | OC(C1=CSC(C(=O)O)=N1)=O    |            | NCCCN1C=C1                |                      | OC(C1=CSC(C(=O)O)=N1)=O |
| 670         | 130224051503260317012803 | 2      |            | NCC1=CC=C(O)C(O)C=C1 |          | ClCC1=CC(C(=O)O)=CC=C1 |            | NCC1=CC=C(S1)C=C1         |          | OC(C1=CC(C(=O)O)=N1)=O     |            | NCCCN1C=C1                |                      | OC(C1=CSC(C(=O)O)=N1)=O |
| 671         | 130224051503260317022808 | 2      |            | NCC1=CC=C(O)C(O)C=C1 |          | ClCC1=CC(C(=O)O)=CC=C1 |            | NCC1=CC=C(S1)C=C1         |          | OC(C1=CC(C(=O)O)=N1)=O     |            | BrC1=CC=C(C)C=C1          |                      | ClCC1=CC(C(=O)O)=CC=C1  |
| 672         | 13022405150326031702804  | 2      |            | NCC1=CC=C(O)C(O)C=C1 |          | ClCC1=CC(C(=O)O)=CC=C1 |            | NCC1=CC=C(S1)C=C1         |          | OC(C1=CC(C(=O)O)=N1)=O     |            | N[C@@H](C)C1=CC=CC=C1 [S] |                      | O=C(O)C1=C(Cl)OC=C1     |
| 673         | 130224051503260317062803 | 2      |            | NCC1=CC=C(O)C(O)C=C1 |          | ClCC1=CC(C(=O)O)=CC=C1 |            | NCC(C)C(O)C               |          | OC(C1=CC(C(=O)O)=N1)=O     |            | N[C@@H](C)C1=CC=CC=C1 [R] |                      | OC([C@@H](C)Cl)=O [S]   |
| 674         | 130224051503260717032802 | 2      |            | NCC1=CC=C(O)C(O)C=C1 |          | ClCC1=CC(C(=O)O)=CC=C1 |            | NCC1=CC=C(N(C)C)C=C1      |          | OC(C1=CSC(C(=O)O)=N1)=O    |            | NCCO                      |                      | OC([C@@H](C)Cl)=O [S]   |
| 675         | 130224051503260817022801 | 2      |            | NCC1=CC=C(O)C(O)C=C1 |          | ClCC1=CC(C(=O)O)=CC=C1 |            | N[C@@H](C)C1=CC=CC=C1     |          | OC(C1=CSC(C(=O)O)=N1)=O    |            | NCCO1=NC2=CC=CC=C2        |                      | ClCC1=CC(C(=O)O)=CC=C1  |
| 676         | 130224051503261017092804 | 2      |            | NCC1=CC=C(O)C(O)C=C1 |          | ClCC1=CC(C(=O)O)=CC=C1 |            | NCC1=CC=C(C)C=C1          |          | ClC(C)=C(C)[C@@H](C)C(O)=O |            | N[C@@H](C)C1=CC=CC=C1 [R] |                      | CCC(O)=O                |
| 677         | 130224051504260817102804 | 2      |            | NCC1=CC=C(O)C(O)C=C1 |          | ClCC1=CC(C(=O)O)=CC=C1 |            | NCC1=CC=CC=C1             |          | OC(C1=CC(C(=O)O)=N1)=O     |            | N[C@@H](C)C1=CC=CC=C1 [S] |                      | O=C(O)C1=C(Cl)OC=C1     |
| 678         | 130224051504260717032805 | 2      |            | NCC1=CC=C(O)C(O)C=C1 |          | ClCC1=CC(C(=O)O)=CC=C1 |            | NCC1=CC=C(N(C)C)C=C1      |          | OC(C1=CSC(C(=O)O)=N1)=O    |            | NCC1COO(C=CC=C)C2O1       |                      | OC([C@@H](C)Cl)=O [S]   |
| 679         | 130224051504260917032803 | 2      |            | NCC1=CC=C(O)C(O)C=C1 |          | ClCC1=CC(C(=O)O)=CC=C1 |            | NCC1=CC(F)=CC(C(F)F)C=C1  |          | OC(C1=CSC(C(=O)O)=N1)=O    |            | NCCCN1C=C1                |                      | OC([C@@H](C)Cl)=O [S]   |
| 680         | 130224051504260917042803 | 2      |            | NCC1=CC=C(O)C(O)C=C1 |          | ClCC1=CC(C(=O)O)=CC=C1 |            | NCC1=CC(F)=CC(C(F)F)C=C1  |          | OC(C1=CSC(C(=O)O)=N1)=O    |            | NCCCN1C=C1                |                      | OC([C@@H](C)Br)=O [R]   |
| 681         | 130224051504261017032810 | 2      |            | NCC1=CC=C(O)C(O)C=C1 |          | ClCC1=CC(C(=O)O)=CC=C1 |            | NCC1=CC=C(C)C=C1          |          | ClC(C)=C(C)[C@@H](C)C(O)=O |            | NCCO1=CC=C(O)C(O)C=C1     |                      | OC([C@@H](C)Cl)=O [S]   |
| 682         | 130224051506260217012803 | 2      |            | NCC1=CC=C(O)C(O)C=C1 |          | ClCC1=CC(C(=O)O)=CC=C1 |            | NCC1=CC=C(C(F)F)C=C1      |          | ClC(C)=C(C)[C@@H](C)C(O)=O |            | NCCCN1C=C1                |                      | OC(C1=CSC(C(=O)O)=N1)=O |
| 683         | 130224051506260217032802 | 2      |            | NCC1=CC=C(O)C(O)C=C1 |          | ClCC1=CC(C(=O)O)=CC=C1 |            | NCC1=CC=C(C(F)F)C=C1      |          | ClC(C)=C(C)[C@@H](C)C(O)=O |            | NCCO                      |                      | OC([C@@H](C)Cl)=O [S]   |
| 684         | 130224051510260317032808 | 2      |            | NCC1=CC=C(O)C(O)C=C1 |          | ClCC1=CC(C(=O)O)=CC=C1 |            | CC(C)CCN                  |          | ClC(C)=C(C)[C@@H](C)C(O)=O |            | BrC1=CC=C(C)C=C1          |                      | OC([C@@H](C)Cl)=O [S]   |
| 685         | 130224051510260417022809 | 2      |            | NCC1=CC=C(O)C(O)C=C1 |          | ClCC1=CC(C(=O)O)=CC=C1 |            | CC(C)CCN                  |          | ClC(C)=C(C)[C@@H](C)C(O)=O |            | NCC1COCCO1                |                      | ClCC1=CC(C(=O)O)=CC=C1  |
| 686         | 130224051510260417032805 | 2      |            | NCC1=CC=C(O)C(O)C=C1 |          | ClCC1=CC(C(=O)O)=CC=C1 |            | CC(C)CCN                  |          | ClC(C)=C(C)[C@@H](C)C(O)=O |            | NCC1COO(C=CC=C)C2O1       |                      | OC([C@@H](C)Cl)=O [S]   |
| 687         | 130224061504260517102804 | 2      |            | NCC1=CC=C(O)C(O)C=C1 |          | ClCC1=CC(C(=O)O)=CC=C1 |            | NCC(C)C(O)C               |          | OC(C1=CC(C(=O)O)=N1)=O     |            | N[C@@H](C)C1=CC=CC=C1 [S] |                      | O=C(O)C1=C(Cl)OC=C1     |
| 688         | 130224071501260317022810 | 2      |            | NCC1=CC=C(C)C=C1     |          | ClCC1=CC(C(=O)O)=CC=C1 |            | NCC1=CC=C(S1)C=C1         |          | OC(C1=CC(C(=O)O)=N1)=O     |            | NCCO1=CC=C(O)C(O)C=C1     |                      | ClCC1=CC(C(=O)O)=CC=C1  |
| 689         | 130224071501260317032802 | 2      |            | NCC1=CC=C(C)C=C1     |          | ClCC1=CC(C(=O)O)=CC=C1 |            | NCC1=CC=C(S1)C=C1         |          | OC(C1=CC(C(=O)O)=N1)=O     |            | NCCO                      |                      | OC([C@@H](C)Cl)=O [S]   |
| 690         | 130224071501260917022809 | 2      |            | NCC1=CC=C(C)C=C1     |          | ClCC1=CC(C(=O)O)=CC=C1 |            | NCC1=CC(F)=CC(C(F)F)C=C1  |          | OC(C1=CSC(C(=O)O)=N1)=O    |            | NCC1COCCO1                |                      | ClCC1=CC(C(=O)O)=CC=C1  |
| 691         | 130224071501261017022809 | 2      |            | NCC1=CC=C(C)C=C1     |          | ClCC1=CC(C(=O)O)=CC=C1 |            | NCC1=CC=C(C)C=C1          |          | ClC(C)=C(C)[C@@H](C)C(O)=O |            | NCC1COCCO1                |                      | ClCC1=CC(C(=O)O)=CC=C1  |
| 692         | 130224071502260217032802 | 2      |            | NCC1=CC=C(C)C=C1     |          | ClCC1=CC(C(=O)O)=CC=C1 |            | NCC1=CC=C(S(=O)(=O)C)C=C1 |          | OC(C1=CC(C(=O)O)=N1)=O     |            | NCCO                      |                      | OC([C@@H](C)Cl)=O [S]   |
| 693         | 130224071502260217032803 | 2      |            | NCC1=CC=C(C)C=C1     |          | ClCC1=CC(C(=O)O)=CC=C1 |            | NCC1=CC=C(S(=O)(=O)C)C=C1 |          | OC(C1=CC(C(=O)O)=N1)=O     |            | NCCCN1C=C1                |                      | OC([C@@H](C)Cl)=O [S]   |
| 694         | 130224071502260417032803 | 2      |            | NCC1=CC=C(C)C=C1     |          | ClCC1=CC(C(=O)O)=CC=C1 |            | NCCN(C)C=O                |          | OC(C1=CC(C(=O)O)=N1)=O     |            | NCCCN1C=C1                |                      | OC([C@@H](C)Cl)=O [S]   |
| 695         | 130224071502260717012808 | 2      |            | NCC1=CC=C(C)C=C1     |          | ClCC1=CC(C(=O)O)=CC=C1 |            | NCC1=CC=C(N(C)C)C=C1      |          | OC(C1=CSC(C(=O)O)=N1)=O    |            | BrC1=CC=C(C)C=C1          |                      | OC(C1=CSC(C(=O)O)=N1)=O |
| 696         | 130224071502260817022803 | 2      |            | NCC1=CC=C(C)C=C1     |          | ClCC1=CC(C(=O)O)=CC=C1 |            | N[C@@H](C)C1=CC=CC=C1     |          | OC(C1=CSC(C(=O)O)=N1)=O    |            | NCCCN1C=C1                |                      | ClCC1=CC(C(=O)O)=CC=C1  |

| observation | full_mol_code2           | copies | Amines(X1) | Amines(X1):smiles | Acid(X1) | Acid(X1):smiles        | Amines(X2) | Amines(X2):smiles         | Acid(X2) | Acid(X2):smiles            | Amines(X3) | Amines(X3):smiles           | Structure of Pair... | Pair3 Acids            |
|-------------|--------------------------|--------|------------|-------------------|----------|------------------------|------------|---------------------------|----------|----------------------------|------------|-----------------------------|----------------------|------------------------|
| 697         | 130224071503260417102804 | 2      |            | NCC1=CC=C(C)C=C1  |          | ClC(=O)C(C(=O)O)=CC=C1 |            | NCCNC(C)=O                |          | OC(=O)C=C(C)C(C)C=C1=O     |            | [N]C@H(C)C1=CC=C(C)C=C1 [S] |                      | O=C(O)C1=CC(C)OC=C1    |
| 698         | 130224071503260817022803 | 2      |            | NCC1=CC=C(C)C=C1  |          | ClC(=O)C(C(=O)O)=CC=C1 |            | [N]C@H(C)C1=CC=C(C)C=C1   |          | OC(=O)C=C(C)C(C)C=C1=O     |            | NCCNC1C=CN=C1               |                      | ClC(=O)C(C(=O)O)=CC=C1 |
| 699         | 130224071503260817022803 | 2      |            | NCC1=CC=C(C)C=C1  |          | ClC(=O)C(C(=O)O)=CC=C1 |            | NCC1=CC(F)=CC(C(F)F)F=C1  |          | OC(=O)C=C(C)C(C)C=C1=O     |            | NCCNC1C=CN=C1               |                      | ClC(=O)C(C(=O)O)=CC=C1 |
| 700         | 130224071503261017032801 | 2      |            | NCC1=CC=C(C)C=C1  |          | ClC(=O)C(C(=O)O)=CC=C1 |            | NCC1=CC=C(C)C=C1          |          | ClC(=O)C=C(C)C(C)C=C1=O    |            | NCC1=CC(C)C=C(C)C=C21       |                      | OC(=O)C1=CC(C)C=C1 [S] |
| 701         | 130224071504260817012806 | 2      |            | NCC1=CC=C(C)C=C1  |          | ClC(=O)C(C(=O)O)=CC=C1 |            | [N]C@H(C)C1=CC=C(C)C=C1   |          | OC(=O)C=C(C)C(C)C=C1=O     |            | [N]C@H(C)C1=CC=C(C)C=C1     |                      | OC(=O)C=C(C)C(C)C=C1=O |
| 702         | 130224081501260417032802 | 2      |            | N1CCNCCC1         |          | ClC(=O)C(C(=O)O)=CC=C1 |            | NCCNC(C)=O                |          | OC(=O)C=C(C)C(C)C=C1=O     |            | NCCO                        |                      | OC(=O)C1=CC(C)C=C1 [S] |
| 703         | 130224081501260817022806 | 2      |            | N1CCNCCC1         |          | ClC(=O)C(C(=O)O)=CC=C1 |            | [N]C@H(C)C1=CC=C(C)C=C1   |          | OC(=O)C=C(C)C(C)C=C1=O     |            | [N]C@H(C)C1=CC=C(C)C=C1     |                      | ClC(=O)C(C(=O)O)=CC=C1 |
| 704         | 130224081501260817042803 | 2      |            | N1CCNCCC1         |          | ClC(=O)C(C(=O)O)=CC=C1 |            | [N]C@H(C)C1=CC=C(C)C=C1   |          | OC(=O)C=C(C)C(C)C=C1=O     |            | NCCNC1C=CN=C1               |                      | OC(=O)C1=CC(C)C=C1 [R] |
| 705         | 130224081504260417092804 | 2      |            | N1CCNCCC1         |          | ClC(=O)C(C(=O)O)=CC=C1 |            | NCCNC(C)=O                |          | OC(=O)C=C(C)C(C)C=C1=O     |            | [N]C@H(C)C1=CC=C(C)C=C1 [R] |                      | CC(=O)O                |
| 706         | 130224081504260817032802 | 2      |            | N1CCNCCC1         |          | ClC(=O)C(C(=O)O)=CC=C1 |            | NCC(C)C(C)O               |          | OC(=O)C=C(C)C(C)C=C1=O     |            | NCCO                        |                      | OC(=O)C1=CC(C)C=C1 [S] |
| 707         | 130224081504260817092804 | 2      |            | N1CCNCCC1         |          | ClC(=O)C(C(=O)O)=CC=C1 |            | [N]C@H(C)C1=CC=C(C)C=C1   |          | OC(=O)C=C(C)C(C)C=C1=O     |            | [N]C@H(C)C1=CC=C(C)C=C1 [R] |                      | CC(=O)O                |
| 708         | 130224081504260817042803 | 2      |            | N1CCNCCC1         |          | ClC(=O)C(C(=O)O)=CC=C1 |            | NCC1=CC(F)=CC(C(F)F)F=C1  |          | OC(=O)C=C(C)C(C)C=C1=O     |            | NCCNC1C=CN=C1               |                      | OC(=O)C1=CC(C)C=C1 [R] |
| 709         | 130224081506260217042805 | 2      |            | N1CCNCCC1         |          | ClC(=O)C(C(=O)O)=CC=C1 |            | NCC1=CC=C(C)C(C)C=C1      |          | ClC(=O)C=C(C)C@H(C)C(C)C=O |            | NCC1COO(C)C=CC=C2)C2O1      |                      | OC(=O)C1=CC(C)C=C1 [R] |
| 710         | 130224081506260317032810 | 2      |            | N1CCNCCC1         |          | ClC(=O)C(C(=O)O)=CC=C1 |            | NCC1=CC=C(C)C(C)C=C1      |          | ClC(=O)C=C(C)C@H(C)C(C)C=O |            | NCC1=CC=C(C)C(C)C=C1        |                      | OC(=O)C1=CC(C)C=C1 [S] |
| 711         | 130224091501260317012803 | 2      |            | NCCNC1C=CN=C1     |          | ClC(=O)C(C(=O)O)=CC=C1 |            | NCC(C)C(S1)               |          | OC(=O)C=C(C)C(C)C=C1=O     |            | NCCNC1C=CN=C1               |                      | OC(=O)C=C(C)C(C)C=C1=O |
| 712         | 130224091501260817032802 | 2      |            | NCCNC1C=CN=C1     |          | ClC(=O)C(C(=O)O)=CC=C1 |            | NCC1=CC=C(C)C=C1          |          | OC(=O)C=C(C)C(C)C=C1=O     |            | NCCO                        |                      | OC(=O)C1=CC(C)C=C1 [S] |
| 713         | 130224091501260717042802 | 2      |            | NCCNC1C=CN=C1     |          | ClC(=O)C(C(=O)O)=CC=C1 |            | NCC1=CC=C(N)C(C)C=C1      |          | OC(=O)C=C(C)C(C)C=C1=O     |            | NCCO                        |                      | OC(=O)C1=CC(C)C=C1 [R] |
| 714         | 130224091501261017022809 | 2      |            | NCCNC1C=CN=C1     |          | ClC(=O)C(C(=O)O)=CC=C1 |            | NCC1=CC=C(C)C=C1          |          | ClC(=O)C=C(C)C@H(C)C(C)C=O |            | NCC1COOCC1                  |                      | ClC(=O)C(C(=O)O)=CC=C1 |
| 715         | 130224091501261017032805 | 2      |            | NCCNC1C=CN=C1     |          | ClC(=O)C(C(=O)O)=CC=C1 |            | NCC1=CC=C(C)C=C1          |          | ClC(=O)C=C(C)C@H(C)C(C)C=O |            | NCC1COO(C)C=C(C)C=C2O1      |                      | OC(=O)C1=CC(C)C=C1 [S] |
| 716         | 130224091501261017092804 | 2      |            | NCCNC1C=CN=C1     |          | ClC(=O)C(C(=O)O)=CC=C1 |            | NCC1=CC=C(C)C=C1          |          | ClC(=O)C=C(C)C@H(C)C(C)C=O |            | [N]C@H(C)C1=CC=C(C)C=C1 [R] |                      | CC(=O)O                |
| 717         | 130224091502260217012803 | 2      |            | NCCNC1C=CN=C1     |          | ClC(=O)C(C(=O)O)=CC=C1 |            | NCC1=CC=C(S(=O)(=O)C)C=C1 |          | OC(=O)C=C(C)C(C)C=C1=O     |            | NCCNC1C=CN=C1               |                      | OC(=O)C=C(C)C(C)C=C1=O |
| 718         | 130224091502260317042803 | 2      |            | NCCNC1C=CN=C1     |          | ClC(=O)C(C(=O)O)=CC=C1 |            | NCC1=CC=C(S1)             |          | OC(=O)C=C(C)C(C)C=C1=O     |            | NCCNC1C=CN=C1               |                      | OC(=O)C1=CC(C)C=C1 [R] |
| 719         | 130224091502260817032809 | 2      |            | NCCNC1C=CN=C1     |          | ClC(=O)C(C(=O)O)=CC=C1 |            | NCC1=CC=C(C)C=C1          |          | OC(=O)C=C(C)C(C)C=C1=O     |            | NCC1COOCC1                  |                      | OC(=O)C1=CC(C)C=C1 [S] |
| 720         | 130224091502260717022802 | 2      |            | NCCNC1C=CN=C1     |          | ClC(=O)C(C(=O)O)=CC=C1 |            | NCC1=CC=C(N)C(C)C=C1      |          | OC(=O)C=C(C)C(C)C=C1=O     |            | NCCO                        |                      | ClC(=O)C(C(=O)O)=CC=C1 |
| 721         | 130224091502260717092804 | 2      |            | NCCNC1C=CN=C1     |          | ClC(=O)C(C(=O)O)=CC=C1 |            | NCC1=CC=C(N)C(C)C=C1      |          | OC(=O)C=C(C)C(C)C=C1=O     |            | [N]C@H(C)C1=CC=C(C)C=C1 [R] |                      | CC(=O)O                |
| 722         | 130224091502260817022804 | 2      |            | NCCNC1C=CN=C1     |          | ClC(=O)C(C(=O)O)=CC=C1 |            | [N]C@H(C)C1=CC=C(C)C=C1   |          | OC(=O)C=C(C)C(C)C=C1=O     |            | NCC1=CC=C(C)C=C1            |                      | ClC(=O)C(C(=O)O)=CC=C1 |
| 723         | 130224091503260217032802 | 2      |            | NCCNC1C=CN=C1     |          | ClC(=O)C(C(=O)O)=CC=C1 |            | NCC1=CC=C(S(=O)(=O)C)C=C1 |          | OC(=O)C=C(C)C(C)C=C1=O     |            | NCCO                        |                      | OC(=O)C1=CC(C)C=C1 [S] |
| 724         | 130224091503260417032807 | 2      |            | NCCNC1C=CN=C1     |          | ClC(=O)C(C(=O)O)=CC=C1 |            | NCCNC(C)=O                |          | OC(=O)C=C(C)C(C)C=C1=O     |            | NCC1=CC(C)C=C(C)C=C1        |                      | OC(=O)C1=CC(C)C=C1 [S] |
| 725         | 130224091503260817032802 | 2      |            | NCCNC1C=CN=C1     |          | ClC(=O)C(C(=O)O)=CC=C1 |            | NCC1=CC=C(C)C=C1          |          | OC(=O)C=C(C)C(C)C=C1=O     |            | NCCO                        |                      | OC(=O)C1=CC(C)C=C1 [S] |
| 726         | 130224091503260717042803 | 2      |            | NCCNC1C=CN=C1     |          | ClC(=O)C(C(=O)O)=CC=C1 |            | NCC1=CC=C(N)C(C)C=C1      |          | OC(=O)C=C(C)C(C)C=C1=O     |            | NCCNC1C=CN=C1               |                      | OC(=O)C1=CC(C)C=C1 [R] |
| 727         | 130224091503261017032802 | 2      |            | NCCNC1C=CN=C1     |          | ClC(=O)C(C(=O)O)=CC=C1 |            | NCC1=CC=C(C)C=C1          |          | ClC(=O)C=C(C)C@H(C)C(C)C=O |            | NCCO                        |                      | OC(=O)C1=CC(C)C=C1 [S] |
| 728         | 130224091504260717032802 | 2      |            | NCCNC1C=CN=C1     |          | ClC(=O)C(C(=O)O)=CC=C1 |            | NCC1=CC=C(N)C(C)C=C1      |          | OC(=O)C=C(C)C(C)C=C1=O     |            | NCCO                        |                      | OC(=O)C1=CC(C)C=C1 [S] |
| 729         | 130224091506260117032801 | 2      |            | NCCNC1C=CN=C1     |          | ClC(=O)C(C(=O)O)=CC=C1 |            | NCC1=CC=C(C)C(C)C=C1      |          | ClC(=O)C=C(C)C@H(C)C(C)C=O |            | NCC1=CC(C)C=C(C)C=C21       |                      | OC(=O)C1=CC(C)C=C1 [S] |



| observation | full_mol_code2           | copies | Amines(X1) | Amines(X1):smiles | Acid(X1) | Acid(X1):smiles        | Amines(X2) | Amines(X2):smiles         | Acid(X2) | Acid(X2):smiles              | Amines(X3) | Amines(X3):smiles           | Structure of Pair... | Pair3Acids             |
|-------------|--------------------------|--------|------------|-------------------|----------|------------------------|------------|---------------------------|----------|------------------------------|------------|-----------------------------|----------------------|------------------------|
| 730         | 130224091506260417012809 | 2      |            | NCCCN1C=CN=C1     |          | ClCC1=CC(C(O)=O)=CC=C1 |            | NCC1=CC=C(C(C(F)F)F)F=C1  |          | ClC(C)C=C(C)C@H(C)C(C)C(O)=O |            | NCC1CCCCC1                  |                      | OC(C1=CSC(C(C)=N1)=O   |
| 731         | 130224091506260417022802 | 2      |            | NCCCN1C=CN=C1     |          | ClCC1=CC(C(O)=O)=CC=C1 |            | NCC1=CC=C(C(F)F)F=C1      |          | ClC(C)C=C(C)C@H(C)C(C)C(O)=O |            | NCCO                        |                      | ClCC1=CC(C(O)=O)=CC=C1 |
| 732         | 130224091506260417022809 | 2      |            | NCCCN1C=CN=C1     |          | ClCC1=CC(C(O)=O)=CC=C1 |            | NCC1=CC=C(C(F)F)F=C1      |          | ClC(C)C=C(C)C@H(C)C(C)C(O)=O |            | NCC1CCCCC1                  |                      | ClCC1=CC(C(O)=O)=CC=C1 |
| 733         | 130224091510260117092804 | 2      |            | NCCCN1C=CN=C1     |          | ClCC1=CC(C(O)=O)=CC=C1 |            | CC(C)CCN                  |          | ClC(C)C=C(C)C@H(C)C(C)C(O)=O |            | N(C@H)C(C1=CC=CC=C1R)       |                      | CCC(O)=O               |
| 734         | 130224101501260217032802 | 2      |            | C1CNCCN1          |          | ClCC1=CC(C(O)=O)=CC=C1 |            | NCC1=CC=C(S(=O)(=O)C)C=C1 |          | OC(C1=CSC(C(C)=N1)=O         |            | NCCO                        |                      | OC(C@H)C(C)=O [S]      |
| 735         | 130224101501260317032802 | 2      |            | C1CNCCN1          |          | ClCC1=CC(C(O)=O)=CC=C1 |            | NCC1=CC=CS1               |          | OC(C1=CSC(C(C)=N1)=O         |            | NCCO                        |                      | OC(C@H)C(C)=O [S]      |
| 736         | 130224101501260317042804 | 2      |            | C1CNCCN1          |          | ClCC1=CC(C(O)=O)=CC=C1 |            | NCC1=CC=CS1               |          | OC(C1=CSC(C(C)=N1)=O         |            | NCC1=CC=C01                 |                      | OC(C@H)C(Br)=O [R]     |
| 737         | 130224101501260517032805 | 2      |            | C1CNCCN1          |          | ClCC1=CC(C(O)=O)=CC=C1 |            | NCC(C)C(O)                |          | OC(C1=CC=C(C(C)=O)C=C1)=O    |            | NCC1COCC(C=CC=C2)C2O1       |                      | OC(C@H)C(C)=O [S]      |
| 738         | 130224101501260717032802 | 2      |            | C1CNCCN1          |          | ClCC1=CC(C(O)=O)=CC=C1 |            | NCC1=CC=C(N(C)C)C=C1      |          | OC(C1=CSC(C(C)=N1)=O         |            | NCCO                        |                      | OC(C@H)C(C)=O [S]      |
| 739         | 130224101502260417012802 | 2      |            | C1CNCCN1          |          | ClCC1=CC(C(O)=O)=CC=C1 |            | NCCNC(C)=O                |          | OC(C1=CC=C(C(C)=O)C=C1)=O    |            | NCCO                        |                      | OC(C1=CSC(C(C)=N1)=O   |
| 740         | 130224101502260417032804 | 2      |            | C1CNCCN1          |          | ClCC1=CC(C(O)=O)=CC=C1 |            | NCCNC(C)=O                |          | OC(C1=CC=C(C(C)=O)C=C1)=O    |            | NCC1=CC=C01                 |                      | OC(C@H)C(C)=O [S]      |
| 741         | 130224101502260717012803 | 2      |            | C1CNCCN1          |          | ClCC1=CC(C(O)=O)=CC=C1 |            | NCC1=CC=C(N(C)C)C=C1      |          | OC(C1=CSC(C(C)=N1)=O         |            | NCCCN1C=CN=C1               |                      | OC(C1=CSC(C(C)=N1)=O   |
| 742         | 130224101502260717032802 | 2      |            | C1CNCCN1          |          | ClCC1=CC(C(O)=O)=CC=C1 |            | NCC1=CC=C(N(C)C)C=C1      |          | OC(C1=CSC(C(C)=N1)=O         |            | NCCO                        |                      | OC(C@H)C(C)=O [S]      |
| 743         | 130224101502260717032804 | 2      |            | C1CNCCN1          |          | ClCC1=CC(C(O)=O)=CC=C1 |            | NCC1=CC=C(N(C)C)C=C1      |          | OC(C1=CSC(C(C)=N1)=O         |            | NCC1=CC=C01                 |                      | OC(C@H)C(C)=O [S]      |
| 744         | 130224101502260917032810 | 2      |            | C1CNCCN1          |          | ClCC1=CC(C(O)=O)=CC=C1 |            | NCC1=CC(F)=CC(C(F)F)F=C1  |          | OC(C1=CSC(C(C)=N1)=O         |            | NCCCN1=CC=C(C)C(C)C(O)C=C1  |                      | OC(C@H)C(C)=O [S]      |
| 745         | 130224101503260317032805 | 2      |            | C1CNCCN1          |          | ClCC1=CC(C(O)=O)=CC=C1 |            | NCC1=CC=CS1               |          | OC(C1=CSC(C(C)=N1)=O         |            | NCC1COCC(C=CC=C2)C2O1       |                      | OC(C@H)C(C)=O [S]      |
| 746         | 130224101503260617022803 | 2      |            | C1CNCCN1          |          | ClCC1=CC(C(O)=O)=CC=C1 |            | NCC1=CC=CC=C1             |          | OC(C1=CC=C(C(C)=O)C=C1)=O    |            | NCCCN1C=CN=C1               |                      | ClCC1=CC(C(O)=O)=CC=C1 |
| 747         | 130224101503260917022809 | 2      |            | C1CNCCN1          |          | ClCC1=CC(C(O)=O)=CC=C1 |            | NCC1=CC(F)=CC(C(F)F)F=C1  |          | OC(C1=CSC(C(C)=N1)=O         |            | NCC1CCCCC1                  |                      | ClCC1=CC(C(O)=O)=CC=C1 |
| 748         | 130224101504260217022802 | 2      |            | C1CNCCN1          |          | ClCC1=CC(C(O)=O)=CC=C1 |            | NCC1=CC=C(S(=O)(=O)C)C=C1 |          | OC(C1=CSC(C(C)=N1)=O         |            | NCCO                        |                      | ClCC1=CC(C(O)=O)=CC=C1 |
| 749         | 130224101504260417032802 | 2      |            | C1CNCCN1          |          | ClCC1=CC(C(O)=O)=CC=C1 |            | NCCNC(C)=O                |          | OC(C1=CC=C(C(C)=O)C=C1)=O    |            | NCCO                        |                      | OC(C@H)C(C)=O [S]      |
| 750         | 13022410150426071702804  | 2      |            | C1CNCCN1          |          | ClCC1=CC(C(O)=O)=CC=C1 |            | NCC1=CC=CC=C1             |          | OC(C1=CC=C(C(C)=O)C=C1)=O    |            | N(C@H)C(C1=CC=C(C)C=C1)S    |                      | O=C(O)C1=C(C)OC=C1     |
| 751         | 130224101504260817032802 | 2      |            | C1CNCCN1          |          | ClCC1=CC(C(O)=O)=CC=C1 |            | NCC1=CC=C(N(C)C)C=C1      |          | OC(C1=CSC(C(C)=N1)=O         |            | NCCO                        |                      | OC(C@H)C(C)=O [S]      |
| 752         | 130224101504260817042805 | 2      |            | C1CNCCN1          |          | ClCC1=CC(C(O)=O)=CC=C1 |            | N(C@H)C(C1=CC=CC=C1)S     |          | OC(C1=CSC(C(C)=N1)=O         |            | NCC1COCC(C=CC=C2)C2O1       |                      | OC(C@H)C(Br)=O [R]     |
| 753         | 130224101504260917092802 | 2      |            | C1CNCCN1          |          | ClCC1=CC(C(O)=O)=CC=C1 |            | NCC1=CC(F)=CC(C(F)F)F=C1  |          | OC(C1=CSC(C(C)=N1)=O         |            | N(C@H)C(C1=CC=CC=C1R)       |                      | ClCC1=CC(C(O)=O)=CC=C1 |
| 754         | 130224101504260917092804 | 2      |            | C1CNCCN1          |          | ClCC1=CC(C(O)=O)=CC=C1 |            | NCC1=CC(F)=CC(C(F)F)F=C1  |          | OC(C1=CSC(C(C)=N1)=O         |            | N(C@H)C(C1=CC=CC=C1R)       |                      | CCC(O)=O               |
| 755         | 130224101509260117012803 | 2      |            | C1CNCCN1          |          | ClCC1=CC(C(O)=O)=CC=C1 |            | NCC1=CC=C(C(C)F)F=C1      |          | ClC(C)C=C(C)C@H(C)C(C)C(O)=O |            | NCCCN1C=CN=C1               |                      | OC(C1=CSC(C(C)=N1)=O   |
| 756         | 130224101509260117022801 | 2      |            | C1CNCCN1          |          | ClCC1=CC(C(O)=O)=CC=C1 |            | NCC1=CC=C(C(C)F)F=C1      |          | ClC(C)C=C(C)C@H(C)C(C)C(O)=O |            | NCCCN1=CC=C(C)C(C)C(O)C=C21 |                      | ClCC1=CC(C(O)=O)=CC=C1 |
| 757         | 130224101509260217022803 | 2      |            | C1CNCCN1          |          | ClCC1=CC(C(O)=O)=CC=C1 |            | NCC1=CC=C(C(C)F)F=C1      |          | ClC(C)C=C(C)C@H(C)C(C)C(O)=O |            | NCCCN1C=CN=C1               |                      | ClCC1=CC(C(O)=O)=CC=C1 |
| 758         | 130224101509260417102802 | 2      |            | C1CNCCN1          |          | ClCC1=CC(C(O)=O)=CC=C1 |            | NCC1=CC=C(C(C)F)F=C1      |          | ClC(C)C=C(C)C@H(C)C(C)C(O)=O |            | N(C@H)C(C1=CC=CC=C1)S       |                      | ClCC1=CC(C(O)=O)=CC=C1 |
| 759         | 130224101510260317022809 | 2      |            | C1CNCCN1          |          | ClCC1=CC(C(O)=O)=CC=C1 |            | CC(C)CCN                  |          | ClC(C)C=C(C)C@H(C)C(C)C(O)=O |            | NCC1CCCCC1                  |                      | ClCC1=CC(C(O)=O)=CC=C1 |
| 760         | 130224101510260417032801 | 2      |            | C1CNCCN1          |          | ClCC1=CC(C(O)=O)=CC=C1 |            | CC(C)CCN                  |          | ClC(C)C=C(C)C@H(C)C(C)C(O)=O |            | NCCCN1=CC=C(C)C(C)C(O)C=C21 |                      | OC(C@H)C(C)=O [S]      |
| 761         | 130324021501260417102804 | 2      |            | NCC1=CC=CN=C1     |          | OC(C1=CSC(C(C)=N1)=O   |            | NCCNC(C)=O                |          | OC(C1=CC=C(C(C)=O)C=C1)=O    |            | N(C@H)C(C1=CC=CC=C1)S       |                      | O=C(O)C1=C(C)OC=C1     |
| 762         | 130324021501260617032801 | 2      |            | NCC1=CC=CN=C1     |          | OC(C1=CSC(C(C)=N1)=O   |            | NCC1=CC=CC=C1             |          | OC(C1=CC=C(C(C)=O)C=C1)=O    |            | NCCCN1=CC=C(C)C(C)C(O)C=C21 |                      | OC(C@H)C(C)=O [S]      |

| observation | full_mol_code2           | copies | Amines(X1) | Amines(X1):smiles | Acid(X1) | Acid(X1):smiles     | Amines(X2) | Amines(X2):smiles         | Acid(X2) | Acid(X2):smiles          | Amines(X3) | Amines(X3):smiles        | Structure of Pair... | Pair3Acids             |
|-------------|--------------------------|--------|------------|-------------------|----------|---------------------|------------|---------------------------|----------|--------------------------|------------|--------------------------|----------------------|------------------------|
| 763         | 130324021502260417102804 | 2      |            | NCC1=C+CN=C1      |          | OC(C1=CSC(C(=O)N)=O |            | NCCN(C)C=O                |          | OC(C1=CC=C(C(=O)C=C1)=O  |            | N[C@@H](C)C1=CC=CC=C1[S  |                      | OC(C)C1=C(C)C(=O)C=C1  |
| 764         | 130324021509260217092802 | 2      |            | NCC1=CC=CN=C1     |          | OC(C1=CSC(C(=O)N)=O |            | NCC1=CC=C(C(F)F)F=C1      |          | ClC(C)C=C(C)C@H(C)C(O)=O |            | N[C@@H](C)C1=CC=CC=C1[R] |                      | ClCC1=CC(C(=O)O)=CC=C1 |
| 765         | 130324031501260217032802 | 2      |            | NCCOC             |          | OC(C1=CSC(C(=O)N)=O |            | NCC1=CC=C(S(=O)(=O)C)O=C1 |          | OC(C1=CC=C(C(=O)N)=O     |            | NCCO                     |                      | OC([C@@H](C)C)O=[S]    |
| 766         | 130324031501260217032802 | 2      |            | NCCOC             |          | OC(C1=CSC(C(=O)N)=O |            | NCC1=CC=C(S1)             |          | OC(C1=CC=C(C(=O)N)=O     |            | NCCO                     |                      | OC([C@@H](C)C)O=[S]    |
| 767         | 130324031501260517022802 | 2      |            | NCCOC             |          | OC(C1=CSC(C(=O)N)=O |            | NCC(C)C(O)C               |          | OC(C1=CC=C(C(=O)C=C1)=O  |            | NCCO                     |                      | ClCC1=CC(C(=O)O)=CC=C1 |
| 768         | 130324031502260217022803 | 2      |            | NCCOC             |          | OC(C1=CSC(C(=O)N)=O |            | NCC1=CC=C(S(=O)(=O)C)O=C1 |          | OC(C1=CC=C(C(=O)N)=O     |            | NCCCN1C=C+CN=C1          |                      | ClCC1=CC(C(=O)O)=CC=C1 |
| 769         | 130324031502260317032802 | 2      |            | NCCOC             |          | OC(C1=CSC(C(=O)N)=O |            | NCC1=CC=C(S1)             |          | OC(C1=CC=C(C(=O)N)=O     |            | NCCO                     |                      | OC([C@@H](C)C)O=[S]    |
| 770         | 130324031502260417012804 | 2      |            | NCCOC             |          | OC(C1=CSC(C(=O)N)=O |            | NCCN(C)C=O                |          | OC(C1=CC=C(C(=O)C=C1)=O  |            | NCC1=CC=C(O1)            |                      | OC(C1=CSC(C(=O)N)=O    |
| 771         | 130324031502260517032802 | 2      |            | NCCOC             |          | OC(C1=CSC(C(=O)N)=O |            | NCC(C)C(O)C               |          | OC(C1=CC=C(C(=O)C=C1)=O  |            | NCCO                     |                      | OC([C@@H](C)C)O=[S]    |
| 772         | 130324031502260517032803 | 2      |            | NCCOC             |          | OC(C1=CSC(C(=O)N)=O |            | NCC(C)C(O)C               |          | OC(C1=CC=C(C(=O)C=C1)=O  |            | NCCCN1C=C+CN=C1          |                      | OC([C@@H](C)C)O=[S]    |
| 773         | 130324031502260517092803 | 2      |            | NCCOC             |          | OC(C1=CSC(C(=O)N)=O |            | NCC(C)C(O)C               |          | OC(C1=CC=C(C(=O)C=C1)=O  |            | N[C@@H](C)C1=CC=CC=C1[R] |                      | OC([C@@H](C)C)O=[S]    |
| 774         | 130324031502260917022805 | 2      |            | NCCOC             |          | OC(C1=CSC(C(=O)N)=O |            | NCC1=CC(F)=CC(C(F)F)F=C1  |          | OC(C1=CC=C(C(=O)N)=O     |            | NCC1COO(C)C=CC=C2=C2O1   |                      | OC([C@@H](C)C)O=[S]    |
| 775         | 130324031503260417012803 | 2      |            | NCCOC             |          | OC(C1=CSC(C(=O)N)=O |            | NCCN(C)C=O                |          | OC(C1=CC=C(C(=O)C=C1)=O  |            | NCCCN1C=C+CN=C1          |                      | OC(C1=CSC(C(=O)N)=O    |
| 776         | 130324031503260517012803 | 2      |            | NCCOC             |          | OC(C1=CSC(C(=O)N)=O |            | NCC(C)C(O)C               |          | OC(C1=CC=C(C(=O)C=C1)=O  |            | NCCCN1C=C+CN=C1          |                      | OC(C1=CSC(C(=O)N)=O    |
| 777         | 130324031503260617012803 | 2      |            | NCCOC             |          | OC(C1=CSC(C(=O)N)=O |            | NCC1=CC=C(O=C1)           |          | OC(C1=CC=C(C(=O)C=C1)=O  |            | NCCCN1C=C+CN=C1          |                      | OC(C1=CSC(C(=O)N)=O    |
| 778         | 130324031504260417022806 | 2      |            | NCCOC             |          | OC(C1=CSC(C(=O)N)=O |            | NCCN(C)C=O                |          | OC(C1=CC=C(C(=O)C=C1)=O  |            | N[C@@H](C)C1=CC=CC=C1    |                      | ClCC1=CC(C(=O)O)=CC=C1 |
| 779         | 130324031504260417032801 | 2      |            | NCCOC             |          | OC(C1=CSC(C(=O)N)=O |            | NCCN(C)C=O                |          | OC(C1=CC=C(C(=O)C=C1)=O  |            | NCCCN1C=C2+CC=CC=C21     |                      | OC([C@@H](C)C)O=[S]    |
| 780         | 130324031504261017012803 | 2      |            | NCCOC             |          | OC(C1=CSC(C(=O)N)=O |            | NCC1=CC=C(C)C=C1          |          | ClC(C)C=C(C)C@H(C)C(O)=O |            | NCCCN1C=C+CN=C1          |                      | OC(C1=CSC(C(=O)N)=O    |
| 781         | 130324031504261017022803 | 2      |            | NCCOC             |          | OC(C1=CSC(C(=O)N)=O |            | NCC1=CC=C(C)C=C1          |          | ClC(C)C=C(C)C@H(C)C(O)=O |            | NCCCN1C=C+CN=C1          |                      | ClCC1=CC(C(=O)O)=CC=C1 |
| 782         | 130324031509260117022809 | 2      |            | NCCOC             |          | OC(C1=CSC(C(=O)N)=O |            | NCC1=CC=C(C(F)F)F=C1      |          | ClC(C)C=C(C)C@H(C)C(O)=O |            | NCC1COOCC1               |                      | ClCC1=CC(C(=O)O)=CC=C1 |
| 783         | 130324031509260217022809 | 2      |            | NCCOC             |          | OC(C1=CSC(C(=O)N)=O |            | NCC1=CC=C(C(F)F)F=C1      |          | ClC(C)C=C(C)C@H(C)C(O)=O |            | NCC1COOCC1               |                      | ClCC1=CC(C(=O)O)=CC=C1 |
| 784         | 130324031509260217032802 | 2      |            | NCCOC             |          | OC(C1=CSC(C(=O)N)=O |            | NCC1=CC=C(C(F)F)F=C1      |          | ClC(C)C=C(C)C@H(C)C(O)=O |            | NCCO                     |                      | OC([C@@H](C)C)O=[S]    |
| 785         | 130324031509260217042804 | 2      |            | NCCOC             |          | OC(C1=CSC(C(=O)N)=O |            | NCC1=CC=C(C(F)F)F=C1      |          | ClC(C)C=C(C)C@H(C)C(O)=O |            | NCC1=CC=C(O1)            |                      | OC([C@@H](C)C)O=[R]    |
| 786         | 130324031509260217092804 | 2      |            | NCCOC             |          | OC(C1=CSC(C(=O)N)=O |            | NCC1=CC=C(C(F)F)F=C1      |          | ClC(C)C=C(C)C@H(C)C(O)=O |            | N[C@@H](C)C1=CC=CC=C1[R] |                      | CC(C)O                 |
| 787         | 130324031509260317032805 | 2      |            | NCCOC             |          | OC(C1=CSC(C(=O)N)=O |            | NCC1=CC=C(C(F)F)F=C1      |          | ClC(C)C=C(C)C@H(C)C(O)=O |            | NCC1COOCC1               |                      | OC([C@@H](C)C)O=[S]    |
| 788         | 130324031509260417042803 | 2      |            | NCCOC             |          | OC(C1=CSC(C(=O)N)=O |            | NCC1=CC=C(C(F)F)F=C1      |          | ClC(C)C=C(C)C@H(C)C(O)=O |            | NCCCN1C=C+CN=C1          |                      | OC([C@@H](C)C)O=[R]    |
| 789         | 130324031510260117012803 | 2      |            | NCCOC             |          | OC(C1=CSC(C(=O)N)=O |            | CC(C)CCN                  |          | ClC(C)C=C(C)C@H(C)C(O)=O |            | NCCCN1C=C+CN=C1          |                      | OC(C1=CSC(C(=O)N)=O    |
| 790         | 130324031510260317032802 | 2      |            | NCCOC             |          | OC(C1=CSC(C(=O)N)=O |            | CC(C)CCN                  |          | ClC(C)C=C(C)C@H(C)C(O)=O |            | NCCO                     |                      | OC([C@@H](C)C)O=[S]    |
| 791         | 130324041501260217092804 | 2      |            | NCC=C             |          | OC(C1=CSC(C(=O)N)=O |            | NCC1=CC=C(S(=O)(=O)C)O=C1 |          | OC(C1=CC=C(C(=O)N)=O     |            | N[C@@H](C)C1=CC=CC=C1[R] |                      | CC(C)O                 |
| 792         | 130324041503260317092804 | 2      |            | NCC=C             |          | OC(C1=CSC(C(=O)N)=O |            | NCC1=CC=C(S1)             |          | OC(C1=CC=C(C(=O)N)=O     |            | N[C@@H](C)C1=CC=CC=C1[R] |                      | CC(C)O                 |
| 793         | 130324041503260417022803 | 2      |            | NCC=C             |          | OC(C1=CSC(C(=O)N)=O |            | NCCN(C)C=O                |          | ClC(C)C=C(C)C@H(C)C(O)=O |            | NCCCN1C=C+CN=C1          |                      | ClCC1=CC(C(=O)O)=CC=C1 |
| 795         | 130324041504260417032801 | 2      |            | NCC=C             |          | OC(C1=CSC(C(=O)N)=O |            | NCCN(C)C=O                |          | ClC(C)C=C(C)C@H(C)C(O)=O |            | NCCCN1C=C2+CC=CC=C21     |                      | OC([C@@H](C)C)O=[S]    |
| 796         | 130324041504260617092804 | 2      |            | NCC=C             |          | OC(C1=CSC(C(=O)N)=O |            | NCC1=CC=C(O=C1)           |          | OC(C1=CC=C(C(=O)C=C1)=O  |            | N[C@@H](C)C1=CC=CC=C1[R] |                      | CC(C)O                 |

| observation | full_molcode2            | copies | Amines(X1) | Amines(X1):smiles    | Acid(X1) | Acid(X1):smiles    | Amines(X2) | Amines(X2):smiles        | Acid(X2) | Acid(X2):smiles       | Amines(X3) | Amines(X3):smiles     | Structure of Pair... | Pair3Acids          |
|-------------|--------------------------|--------|------------|----------------------|----------|--------------------|------------|--------------------------|----------|-----------------------|------------|-----------------------|----------------------|---------------------|
| 797         | 130324041504260717032802 | 2      |            | NCC=C                |          | OC(C1=CSC(CO)N1)=O |            | NCC1=CC=C(N(C)C)C=C1     |          | OC(C1=CSC(CO)N1)=O    |            | NCCO                  |                      | OC(C@H)(C)O=[S]     |
| 798         | 130324041509260117022803 | 2      |            | NCC=C                |          | OC(C1=CSC(CO)N1)=O |            | NCC1=CC=C(C(F)F)F=C1     |          | ClC(C)=C(C@H)(C)O     |            | NCCCN1C=CN=C1         |                      | ClC1=CC(CO)=O=CC=C1 |
| 799         | 130324041509260117032803 | 2      |            | NCC=C                |          | OC(C1=CSC(CO)N1)=O |            | NCC1=CC=C(C(F)F)F=C1     |          | ClC(C)=C(C@H)(C)O     |            | NCCCN1C=CN=C1         |                      | OC(C@H)(C)O=[S]     |
| 800         | 130324041509260117032803 | 2      |            | NCC=C                |          | OC(C1=CSC(CO)N1)=O |            | NCC1=CC=C(C(F)F)F=C1     |          | ClC(C)=C(C@H)(C)O     |            | NCCCN1C=CN=C1         |                      | OC(C@H)(C)O=[S]     |
| 801         | 130324041509260117032801 | 2      |            | NCC=C                |          | OC(C1=CSC(CO)N1)=O |            | NCC1=CC=C(C(F)F)F=C1     |          | ClC(C)=C(C@H)(C)O     |            | NCCCN1C=CN=C1         |                      | OC(C@H)(C)O=[S]     |
| 802         | 130324051501260217022802 | 2      |            | NCC1=CC=C(O)C(O)C=C1 |          | OC(C1=CSC(CO)N1)=O |            | NCC1=CC=C(S(=O)(C)O)C=C1 |          | OC(C1=CSC(CO)N1)=O    |            | NCCO                  |                      | ClC1=CC(CO)=O=CC=C1 |
| 803         | 130324051501260217032802 | 2      |            | NCC1=CC=C(O)C(O)C=C1 |          | OC(C1=CSC(CO)N1)=O |            | NCC1=CC=C(S(=O)(C)O)C=C1 |          | OC(C1=CSC(CO)N1)=O    |            | NCCO                  |                      | OC(C1=CSC(CO)N1)=O  |
| 804         | 130324051501260117012804 | 2      |            | NCC1=CC=C(O)C(O)C=C1 |          | OC(C1=CSC(CO)N1)=O |            | NCC1=CC=C(C)C=C1         |          | OC(C1=CC=C(CO)C=C1)=O |            | NCC1=CC=C(C)C=C1      |                      | OC(C1=CSC(CO)N1)=O  |
| 805         | 130324051501260117032806 | 2      |            | NCC1=CC=C(O)C(O)C=C1 |          | OC(C1=CSC(CO)N1)=O |            | NCC1=CC=C(C)C=C1         |          | OC(C1=CC=C(CO)C=C1)=O |            | NCC1=CC=C(C)C=C1      |                      | OC(C1=CSC(CO)N1)=O  |
| 806         | 130324051501260717032802 | 2      |            | NCC1=CC=C(O)C(O)C=C1 |          | OC(C1=CSC(CO)N1)=O |            | NCC1=CC=C(N(C)C)C=C1     |          | OC(C1=CSC(CO)N1)=O    |            | NCCO                  |                      | OC(C@H)(C)O=[S]     |
| 807         | 130324051501260117032810 | 2      |            | NCC1=CC=C(O)C(O)C=C1 |          | OC(C1=CSC(CO)N1)=O |            | N(C@H)(C)C1=CC=CC=C1     |          | OC(C1=CSC(CO)N1)=O    |            | NCCCN1C=CC(O)C(O)C=C1 |                      | OC(C@H)(C)O=[S]     |
| 808         | 130324051502260217032801 | 2      |            | NCC1=CC=C(O)C(O)C=C1 |          | OC(C1=CSC(CO)N1)=O |            | NCC1=CC=C(S(=O)(C)O)C=C1 |          | OC(C1=CSC(CO)N1)=O    |            | NCCCN1C=CC(O)C(O)C=C1 |                      | OC(C1=CSC(CO)N1)=O  |
| 809         | 130324051502260117022809 | 2      |            | NCC1=CC=C(O)C(O)C=C1 |          | OC(C1=CSC(CO)N1)=O |            | NCC1=CC=C(C)C=C1         |          | OC(C1=CC=C(CO)C=C1)=O |            | NCC1=CC=C(C)C=C1      |                      | ClC1=CC(CO)=O=CC=C1 |
| 810         | 130324051503260417012803 | 2      |            | NCC1=CC=C(O)C(O)C=C1 |          | OC(C1=CSC(CO)N1)=O |            | NCCN(C)C=O               |          | OC(C1=CC=C(CO)C=C1)=O |            | NCCCN1C=CN=C1         |                      | OC(C1=CSC(CO)N1)=O  |
| 811         | 130324051503260117032802 | 2      |            | NCC1=CC=C(O)C(O)C=C1 |          | OC(C1=CSC(CO)N1)=O |            | NCC1=CC=C(C)C=C1         |          | OC(C1=CC=C(CO)C=C1)=O |            | NCCO                  |                      | OC(C@H)(C)O=[S]     |
| 812         | 130324051503260117022809 | 2      |            | NCC1=CC=C(O)C(O)C=C1 |          | OC(C1=CSC(CO)N1)=O |            | NCC1=CC(F)=CC(C(F)F)F=C1 |          | OC(C1=CSC(CO)N1)=O    |            | NCC1=CC=C(C)C=C1      |                      | ClC1=CC(CO)=O=CC=C1 |
| 813         | 130324051504260117032808 | 2      |            | NCC1=CC=C(O)C(O)C=C1 |          | OC(C1=CSC(CO)N1)=O |            | NCC1=CC=C(C)C=C1         |          | OC(C1=CC=C(CO)C=C1)=O |            | BrC1=CC=C(C)C=C1      |                      | OC(C@H)(C)O=[S]     |
| 814         | 13032405150426011702804  | 2      |            | NCC1=CC=C(O)C(O)C=C1 |          | OC(C1=CSC(CO)N1)=O |            | N(C@H)(C)C1=CC=CC=C1     |          | OC(C1=CSC(CO)N1)=O    |            | N(C@H)(C)C1=CC=CC=C1  |                      | O=C(O)C1=C(C)OC=C1  |
| 815         | 130324051504260117012803 | 2      |            | NCC1=CC=C(O)C(O)C=C1 |          | OC(C1=CSC(CO)N1)=O |            | NCC1=CC(F)=CC(C(F)F)F=C1 |          | OC(C1=CSC(CO)N1)=O    |            | NCCCN1C=CN=C1         |                      | OC(C1=CSC(CO)N1)=O  |
| 816         | 130324051509260217092804 | 2      |            | NCC1=CC=C(O)C(O)C=C1 |          | OC(C1=CSC(CO)N1)=O |            | NCC1=CC=C(C(F)F)F=C1     |          | ClC(C)=C(C@H)(C)O     |            | N(C@H)(C)C1=CC=CC=C1  |                      | CCO(O)=O            |
| 817         | 130324051509260317032806 | 2      |            | NCC1=CC=C(O)C(O)C=C1 |          | OC(C1=CSC(CO)N1)=O |            | NCC1=CC=C(C(F)F)F=C1     |          | ClC(C)=C(C@H)(C)O     |            | N(C@H)(C)C1=CC=CC=C1  |                      | OC(C@H)(C)O=[S]     |
| 818         | 130324051509260417022807 | 2      |            | NCC1=CC=C(O)C(O)C=C1 |          | OC(C1=CSC(CO)N1)=O |            | NCC1=CC=C(C(F)F)F=C1     |          | ClC(C)=C(C@H)(C)O     |            | NCC1=CC=C(CO)C(O)C=C1 |                      | ClC1=CC(CO)=O=CC=C1 |
| 819         | 130324061504260517032802 | 2      |            | NCC1=CC=C(O)C(O)C=C1 |          | OC(C1=CSC(CO)N1)=O |            | NCC(C)C(O)O              |          | OC(C1=CC=C(CO)C=C1)=O |            | NCCO                  |                      | OC(C@H)(C)O=[S]     |
| 820         | 130324071501260217032802 | 2      |            | NCC1=CC=C(O)C(O)C=C1 |          | OC(C1=CSC(CO)N1)=O |            | NCC1=CC=C(S(=O)(C)O)C=C1 |          | OC(C1=CSC(CO)N1)=O    |            | NCCO                  |                      | OC(C@H)(C)O=[S]     |
| 821         | 130324071501260417032808 | 2      |            | NCC1=CC=C(O)C(O)C=C1 |          | OC(C1=CSC(CO)N1)=O |            | NCCN(C)C=O               |          | OC(C1=CC=C(CO)C=C1)=O |            | BrC1=CC=C(C)C=C1      |                      | OC(C@H)(C)O=[S]     |
| 822         | 130324071501260117032806 | 2      |            | NCC1=CC=C(O)C(O)C=C1 |          | OC(C1=CSC(CO)N1)=O |            | NCC1=CC=C(C)C=C1         |          | OC(C1=CC=C(CO)C=C1)=O |            | N(C@H)(C)C1=CC=CC=C1  |                      | OC(C@H)(C)O=[S]     |
| 823         | 130324071501260717032810 | 2      |            | NCC1=CC=C(O)C(O)C=C1 |          | OC(C1=CSC(CO)N1)=O |            | NCC1=CC=C(N(C)C)C=C1     |          | OC(C1=CSC(CO)N1)=O    |            | NCCCN1C=CC(O)C(O)C=C1 |                      | OC(C@H)(C)O=[S]     |
| 824         | 130324071502260317102804 | 2      |            | NCC1=CC=C(O)C(O)C=C1 |          | OC(C1=CSC(CO)N1)=O |            | NCC1=CC=C(S)C=C1         |          | OC(C1=CSC(CO)N1)=O    |            | N(C@H)(C)C1=CC=CC=C1  |                      | O=C(O)C1=C(C)OC=C1  |
| 825         | 130324071502260517032802 | 2      |            | NCC1=CC=C(O)C(O)C=C1 |          | OC(C1=CSC(CO)N1)=O |            | NCC(C)C(O)O              |          | OC(C1=CC=C(CO)C=C1)=O |            | NCCO                  |                      | OC(C@H)(C)O=[S]     |
| 826         | 130324071502260817102804 | 2      |            | NCC1=CC=C(O)C(O)C=C1 |          | OC(C1=CSC(CO)N1)=O |            | N(C@H)(C)C1=CC=CC=C1     |          | OC(C1=CSC(CO)N1)=O    |            | N(C@H)(C)C1=CC=CC=C1  |                      | O=C(O)C1=C(C)OC=C1  |
| 827         | 130324071503260417032802 | 2      |            | NCC1=CC=C(O)C(O)C=C1 |          | OC(C1=CSC(CO)N1)=O |            | NCCN(C)C=O               |          | OC(C1=CC=C(CO)C=C1)=O |            | NCCO                  |                      | OC(C@H)(C)O=[S]     |
| 828         | 130324071503260517092803 | 2      |            | NCC1=CC=C(O)C(O)C=C1 |          | OC(C1=CSC(CO)N1)=O |            | NCC(C)C(O)O              |          | OC(C1=CC=C(CO)C=C1)=O |            | N(C@H)(C)C1=CC=CC=C1  |                      | OC(C@H)(C)O=[S]     |
| 829         | 130324071503261017032802 | 2      |            | NCC1=CC=C(O)C(O)C=C1 |          | OC(C1=CSC(CO)N1)=O |            | NCC1=CC=C(O)C=C1         |          | ClC(C)=C(C@H)(C)O     |            | NCCO                  |                      | OC(C@H)(C)O=[S]     |



| observation | full_molcode2            | copies | Amines(X1) | Amines(X1):smiles | Acid(X1) | Acid(X1):smiles    | Amines(X2) | Amines(X2):smiles         | Acid(X2) | Acid(X2):smiles    | Amines(X3) | Amines(X3):smiles          | Structure of Pair... | Pair3Acids             |
|-------------|--------------------------|--------|------------|-------------------|----------|--------------------|------------|---------------------------|----------|--------------------|------------|----------------------------|----------------------|------------------------|
| 830         | 130324071504260317042803 | 2      |            | NCC1=CC=C(C)C=C1  |          | OC(C1=CSC(CO)N1)=O |            | NCC1=CC=C(S1)             |          | OC(C1=CC(CO)N1)=O  |            | NCCCN1C=CN=C1              |                      | OC(C@H)(C)Br=O [R]     |
| 831         | 130324071504260417042806 | 2      |            | NCC1=CC=C(C)C=C1  |          | OC(C1=CSC(CO)N1)=O |            | NCCN(C)=O                 |          | OC(C1=CC(CO)N1)=O  |            | NCC(C@H)(C)C1=CC=CC=C1     |                      | OC(C@H)(C)Br=O [R]     |
| 832         | 130324071504260517032803 | 2      |            | NCC1=CC=C(C)C=C1  |          | OC(C1=CSC(CO)N1)=O |            | NCC(C)C(O)                |          | OC(C1=CC(CO)N1)=O  |            | NCCCN1C=CN=C1              |                      | OC(C@H)(C)C(O)=O [S]   |
| 833         | 13032407150426117022803  | 2      |            | NCC1=CC=C(C)C=C1  |          | OC(C1=CSC(CO)N1)=O |            | NCC1=CC=C(C)C=C1          |          | OC(C1=CC(CO)N1)=O  |            | NCCCN1C=CN=C1              |                      | ClCC1=CC(C(O)=O)=CC=C1 |
| 834         | 130324071509260417042804 | 2      |            | NCC1=CC=C(C)C=C1  |          | OC(C1=CSC(CO)N1)=O |            | NCC1=CC=C(C(F)F)F=C1      |          | OC(C1=CC(CO)N1)=O  |            | NCC1=CC=C(C)C=C1           |                      | OC(C@H)(C)Br=O [R]     |
| 835         | 130324071510260117102804 | 2      |            | NCC1=CC=C(C)C=C1  |          | OC(C1=CSC(CO)N1)=O |            | CC(C)CCN                  |          | OC(C1=CC(CO)N1)=O  |            | NCC(C@H)(C)C1=CC=CC=C1 [S] |                      | O=C(O)C1=C(C)OC=C1     |
| 836         | 130324071510260417032804 | 2      |            | NCC1=CC=C(C)C=C1  |          | OC(C1=CSC(CO)N1)=O |            | CC(C)CCN                  |          | OC(C1=CC(CO)N1)=O  |            | NCC1=CC=C(C)C=C1           |                      | OC(C@H)(C)C(O)=O [S]   |
| 837         | 130324081501260217032802 | 2      |            | N1CCNCCC1         |          | OC(C1=CSC(CO)N1)=O |            | NCC1=CC=C(S(=O)(=O)C)C=C1 |          | OC(C1=CC(CO)N1)=O  |            | NCCO                       |                      | OC(C@H)(C)C(O)=O [S]   |
| 838         | 130324081501260317032806 | 2      |            | N1CCNCCC1         |          | OC(C1=CSC(CO)N1)=O |            | NCC1=CC=C(S1)             |          | OC(C1=CC(CO)N1)=O  |            | NCC(C@H)(C)C1=CC=CC=C1     |                      | OC(C@H)(C)C(O)=O [S]   |
| 839         | 130324081501260817012803 | 2      |            | N1CCNCCC1         |          | OC(C1=CSC(CO)N1)=O |            | NCC1=CC=C(C)C=C1          |          | OC(C1=CC(CO)N1)=O  |            | NCCCN1C=CN=C1              |                      | OC(C1=CSC(CO)N1)=O     |
| 840         | 130324081502260717012803 | 2      |            | N1CCNCCC1         |          | OC(C1=CSC(CO)N1)=O |            | NCC1=CC=C(N(C)C)C=C1      |          | OC(C1=CSC(CO)N1)=O |            | NCCCN1C=CN=C1              |                      | OC(C1=CSC(CO)N1)=O     |
| 841         | 130324081503260217102804 | 2      |            | N1CCNCCC1         |          | OC(C1=CSC(CO)N1)=O |            | NCC1=CC=C(S(=O)(=O)C)C=C1 |          | OC(C1=CC(CO)N1)=O  |            | NCC(C@H)(C)C1=CC=CC=C1 [S] |                      | O=C(O)C1=C(C)OC=C1     |
| 842         | 130324081503260317032803 | 2      |            | N1CCNCCC1         |          | OC(C1=CSC(CO)N1)=O |            | NCC1=CC=C(S1)             |          | OC(C1=CC(CO)N1)=O  |            | NCCCN1C=CN=C1              |                      | OC(C@H)(C)C(O)=O [S]   |
| 843         | 130324081503260817012803 | 2      |            | N1CCNCCC1         |          | OC(C1=CSC(CO)N1)=O |            | NCC1=CC=C(C)C=C1          |          | OC(C1=CC(CO)N1)=O  |            | NCCCN1C=CN=C1              |                      | OC(C1=CSC(CO)N1)=O     |
| 844         | 130324081503260717022802 | 2      |            | N1CCNCCC1         |          | OC(C1=CSC(CO)N1)=O |            | NCC1=CC=C(N(C)C)C=C1      |          | OC(C1=CSC(CO)N1)=O |            | NCC(C@H)(C)C1=CC=CC=C1 [R] |                      | ClCC1=CC(C(O)=O)=CC=C1 |
| 845         | 130324081503260717102804 | 2      |            | N1CCNCCC1         |          | OC(C1=CSC(CO)N1)=O |            | NCC1=CC=C(N(C)C)C=C1      |          | OC(C1=CSC(CO)N1)=O |            | NCC(C@H)(C)C1=CC=CC=C1 [S] |                      | O=C(O)C1=C(C)OC=C1     |
| 846         | 130324081503260817032809 | 2      |            | N1CCNCCC1         |          | OC(C1=CSC(CO)N1)=O |            | NCC(C@H)(C)C1=CC=CC=C1    |          | OC(C1=CSC(CO)N1)=O |            | NCC1CCCC1                  |                      | OC(C@H)(C)C(O)=O [S]   |
| 847         | 130324081504260517032802 | 2      |            | N1CCNCCC1         |          | OC(C1=CSC(CO)N1)=O |            | NCC(C)C(O)                |          | OC(C1=CC(CO)N1)=O  |            | NCCO                       |                      | OC(C@H)(C)C(O)=O [S]   |
| 848         | 130324081504261017102804 | 2      |            | N1CCNCCC1         |          | OC(C1=CSC(CO)N1)=O |            | NCC1=CC=C(C)C=C1          |          | OC(C1=CC(CO)N1)=O  |            | NCC(C@H)(C)C1=CC=CC=C1 [S] |                      | O=C(O)C1=C(C)OC=C1     |
| 849         | 130324081509260217032807 | 2      |            | N1CCNCCC1         |          | OC(C1=CSC(CO)N1)=O |            | NCC1=CC=C(C(F)F)F=C1      |          | OC(C1=CC(CO)N1)=O  |            | NCC1=CC=C(C)C=C1           |                      | OC(C@H)(C)C(O)=O [S]   |
| 850         | 130324081509260217042803 | 2      |            | N1CCNCCC1         |          | OC(C1=CSC(CO)N1)=O |            | NCC1=CC=C(C(F)F)F=C1      |          | OC(C1=CC(CO)N1)=O  |            | NCCCN1C=CN=C1              |                      | OC(C@H)(C)Br=O [R]     |
| 851         | 130324081501260217022809 | 2      |            | NCCCN1C=CN=C1     |          | OC(C1=CSC(CO)N1)=O |            | NCC1=CC=C(S(=O)(=O)C)C=C1 |          | OC(C1=CC(CO)N1)=O  |            | NCC1CCCC1                  |                      | ClCC1=CC(C(O)=O)=CC=C1 |
| 852         | 130324091501260317092804 | 2      |            | NCCCN1C=CN=C1     |          | OC(C1=CSC(CO)N1)=O |            | NCC1=CC=C(S1)             |          | OC(C1=CC(CO)N1)=O  |            | NCC(C@H)(C)C1=CC=CC=C1 [R] |                      | CCC(O)=O               |
| 853         | 130324091501260717032802 | 2      |            | NCCCN1C=CN=C1     |          | OC(C1=CSC(CO)N1)=O |            | NCC1=CC=C(N(C)C)C=C1      |          | OC(C1=CSC(CO)N1)=O |            | NCCO                       |                      | OC(C@H)(C)C(O)=O [S]   |
| 854         | 130324091501260917032805 | 2      |            | NCCCN1C=CN=C1     |          | OC(C1=CSC(CO)N1)=O |            | NCC1=CC(F)=CC(C(F)F)F=C1  |          | OC(C1=CSC(CO)N1)=O |            | NCC1=CC=C(C)C=C1           |                      | OC(C@H)(C)C(O)=O [S]   |
| 855         | 130324091502260817032804 | 2      |            | NCCCN1C=CN=C1     |          | OC(C1=CSC(CO)N1)=O |            | NCC1=CC=C(C)C=C1          |          | OC(C1=CC(CO)N1)=O  |            | NCC1=CC=C(C)C=C1           |                      | OC(C@H)(C)C(O)=O [S]   |
| 856         | 130324091502260717022806 | 2      |            | NCCCN1C=CN=C1     |          | OC(C1=CSC(CO)N1)=O |            | NCC1=CC=C(N(C)C)C=C1      |          | OC(C1=CSC(CO)N1)=O |            | NCC(C@H)(C)C1=CC=CC=C1     |                      | ClCC1=CC(C(O)=O)=CC=C1 |
| 857         | 130324091503260317042803 | 2      |            | NCCCN1C=CN=C1     |          | OC(C1=CSC(CO)N1)=O |            | NCC1=CC=C(S1)             |          | OC(C1=CC(CO)N1)=O  |            | NCCCN1C=CN=C1              |                      | OC(C@H)(C)Br=O [R]     |
| 858         | 130324091503260417012803 | 2      |            | NCCCN1C=CN=C1     |          | OC(C1=CSC(CO)N1)=O |            | NCCN(C)=O                 |          | OC(C1=CC(CO)N1)=O  |            | NCCCN1C=CN=C1              |                      | OC(C1=CSC(CO)N1)=O     |
| 859         | 130324091503260717022803 | 2      |            | NCCCN1C=CN=C1     |          | OC(C1=CSC(CO)N1)=O |            | NCC1=CC=C(N(C)C)C=C1      |          | OC(C1=CSC(CO)N1)=O |            | NCCCN1C=CN=C1              |                      | ClCC1=CC(C(O)=O)=CC=C1 |
| 860         | 130324091503260817012803 | 2      |            | NCCCN1C=CN=C1     |          | OC(C1=CSC(CO)N1)=O |            | NCC(C@H)(C)C1=CC=CC=C1    |          | OC(C1=CSC(CO)N1)=O |            | NCCCN1C=CN=C1              |                      | OC(C1=CSC(CO)N1)=O     |
| 861         | 130324091503260817022809 | 2      |            | NCCCN1C=CN=C1     |          | OC(C1=CSC(CO)N1)=O |            | NCC(C@H)(C)C1=CC=CC=C1    |          | OC(C1=CSC(CO)N1)=O |            | NCC1CCCC1                  |                      | ClCC1=CC(C(O)=O)=CC=C1 |
| 862         | 130324091504260317032805 | 2      |            | NCCCN1C=CN=C1     |          | OC(C1=CSC(CO)N1)=O |            | NCC1=CC=C(S1)             |          | OC(C1=CC(CO)N1)=O  |            | NCC1=CC=C(C)C=C1           |                      | OC(C@H)(C)C(O)=O [S]   |

| observation | full_mol_code2           | copies | Amines(X1) | Amines(X1):smiles | Acid(X1) | Acid(X1):smiles         | Amines(X2) | Amines(X2):smiles         | Acid(X2) | Acid(X2):smiles         | Amines(X3) | Amines(X3):smiles       | Structure of Pair... | Pair3Acids           |
|-------------|--------------------------|--------|------------|-------------------|----------|-------------------------|------------|---------------------------|----------|-------------------------|------------|-------------------------|----------------------|----------------------|
| 863         | 13032409150260217102804  | 2      |            | NCCN(C)C=CN=C1    |          | OC(C1=CSC(C(=O)N1)=O    |            | NCC1=CC=C(C(C(F)F)F)F=C1  |          | ClC(C)C=C(C@H)(C)C(O)=O |            | N(C@H)(C)C1=CC=CC=C1[S  |                      | OC(C)C1=C(C)OC=C1    |
| 864         | 13032409150260317022808  | 2      |            | NCCN(C)C=CN=C1    |          | OC(C1=CSC(C(=O)N1)=O    |            | NCC1=CC=C(C(C(F)F)F)F=C1  |          | ClC(C)C=C(C@H)(C)C(O)=O |            | BrC1=CC=C(C)N=C1        |                      | ClC1=CC(C)O)=CC=C1   |
| 865         | 13032409150260417022806  | 2      |            | NCCN(C)C=CN=C1    |          | OC(C1=CSC(C(=O)N1)=O    |            | NCC1=CC=C(C(C(F)F)F)F=C1  |          | ClC(C)C=C(C@H)(C)C(O)=O |            | N(C@H)(C)C1=CC=CC=C1    |                      | ClC1=CC(C)O)=CC=C1   |
| 866         | 130324091510260217102804 | 2      |            | NCCN(C)C=CN=C1    |          | OC(C1=CSC(C(=O)N1)=O    |            | CC(C)CCN                  |          | ClC(C)C=C(C@H)(C)C(O)=O |            | N(C@H)(C)C1=CC=CC=C1[S  |                      | OC(C)C1=C(C)OC=C1    |
| 867         | 13032410150260217042801  | 2      |            | C1CNCCN1          |          | OC(C1=CSC(C(=O)N1)=O    |            | NCC1=CC=C(S(=O)(=O)C)C=C1 |          | OC(C1=CC(C)C(=O)N1)=O   |            | NCC1=CNC2=CC=CC=C2      |                      | OC(C@H)(C)Br)=O [R]  |
| 868         | 13032410150260317032802  | 2      |            | C1CNCCN1          |          | OC(C1=CSC(C(=O)N1)=O    |            | NCC1=CC=CS1               |          | OC(C1=CC(C)C(=O)N1)=O   |            | NCCO                    |                      | OC(C@H)(C)O)=O [S]   |
| 869         | 13032410150260617012805  | 2      |            | C1CNCCN1          |          | OC(C1=CSC(C(=O)N1)=O    |            | NCC1=CC=CC=C1             |          | OC(C1=CC(C)C(=O)N1)=O   |            | NCC1COO(C=CC=C2)C2O1    |                      | OC(C1=CSC(C(=O)N1)=O |
| 870         | 13032410150260917032802  | 2      |            | C1CNCCN1          |          | OC(C1=CSC(C(=O)N1)=O    |            | NCC1=CC(F)=CC(C(F)F)F=C1  |          | OC(C1=CSC(C(=O)N1)=O    |            | NCCO                    |                      | OC(C@H)(C)O)=O [S]   |
| 871         | 13032410150261017022805  | 2      |            | C1CNCCN1          |          | OC(C1=CSC(C(=O)N1)=O    |            | NCC1=CC=C(C)C=C1          |          | ClC(C)C=C(C@H)(C)C(O)=O |            | NCC1COO(C=CC=C2)C2O1    |                      | ClC1=CC(C)O)=CC=C1   |
| 872         | 13032410150261017032805  | 2      |            | C1CNCCN1          |          | OC(C1=CSC(C(=O)N1)=O    |            | NCC1=CC=C(C)C=C1          |          | ClC(C)C=C(C@H)(C)C(O)=O |            | NCC1COO(C=CC=C2)C2O1    |                      | OC(C@H)(C)O)=O [S]   |
| 873         | 13032410150260317032807  | 2      |            | C1CNCCN1          |          | OC(C1=CSC(C(=O)N1)=O    |            | NCC1=CC=CS1               |          | OC(C1=CC(C)C(=O)N1)=O   |            | NCC1=CC(O)C(=O)C1       |                      | OC(C@H)(C)O)=O [S]   |
| 874         | 13032410150260317042805  | 2      |            | C1CNCCN1          |          | OC(C1=CSC(C(=O)N1)=O    |            | NCC1=CC=CS1               |          | OC(C1=CC(C)C(=O)N1)=O   |            | NCC1COO(C=CC=C2)C2O1    |                      | OC(C@H)(C)Br)=O [R]  |
| 875         | 13032410150260417012803  | 2      |            | C1CNCCN1          |          | OC(C1=CSC(C(=O)N1)=O    |            | NCCN(C)C=O                |          | OC(C1=CC(C)C(=O)N1)=O   |            | NCCN(C)C=CN=C1          |                      | OC(C1=CSC(C(=O)N1)=O |
| 876         | 13032410150260717032806  | 2      |            | C1CNCCN1          |          | OC(C1=CSC(C(=O)N1)=O    |            | NCC1=CC=C(N(C)C)C=C1      |          | OC(C1=CSC(C(=O)N1)=O    |            | N(C@H)(C)C1=CC=CC=C1    |                      | OC(C@H)(C)O)=O [S]   |
| 877         | 13032410150260817022804  | 2      |            | C1CNCCN1          |          | OC(C1=CSC(C(=O)N1)=O    |            | N(C@H)(C)C1=CC=CC=C1      |          | OC(C1=CSC(C(=O)N1)=O    |            | NCC1=CC=C1              |                      | ClC1=CC(C)O)=CC=C1   |
| 878         | 13032410150260817022809  | 2      |            | C1CNCCN1          |          | OC(C1=CSC(C(=O)N1)=O    |            | N(C@H)(C)C1=CC=CC=C1      |          | OC(C1=CSC(C(=O)N1)=O    |            | NCC1COOCC1              |                      | ClC1=CC(C)O)=CC=C1   |
| 879         | 13032410150260817032802  | 2      |            | C1CNCCN1          |          | OC(C1=CSC(C(=O)N1)=O    |            | N(C@H)(C)C1=CC=CC=C1      |          | OC(C1=CSC(C(=O)N1)=O    |            | NCCO                    |                      | OC(C@H)(C)O)=O [S]   |
| 880         | 130324101503260317092802 | 2      |            | C1CNCCN1          |          | OC(C1=CSC(C(=O)N1)=O    |            | NCC1=CC=CS1               |          | OC(C1=CC(C)C(=O)N1)=O   |            | N(C@H)(C)C1=CC=CC=C1[R] |                      | ClC1=CC(C)O)=CC=C1   |
| 881         | 130324101503260717022802 | 2      |            | C1CNCCN1          |          | OC(C1=CSC(C(=O)N1)=O    |            | NCC1=CC=C(N(C)C)C=C1      |          | OC(C1=CSC(C(=O)N1)=O    |            | NCCO                    |                      | ClC1=CC(C)O)=CC=C1   |
| 882         | 130324101504260217022809 | 2      |            | C1CNCCN1          |          | OC(C1=CSC(C(=O)N1)=O    |            | NCC1=CC=C(S(=O)(=O)C)C=C1 |          | OC(C1=CC(C)C(=O)N1)=O   |            | NCC1COOCC1              |                      | ClC1=CC(C)O)=CC=C1   |
| 883         | 130324101504260317012803 | 2      |            | C1CNCCN1          |          | OC(C1=CSC(C(=O)N1)=O    |            | NCC1=CC=CS1               |          | OC(C1=CC(C)C(=O)N1)=O   |            | NCCN(C)C=CN=C1          |                      | OC(C1=CSC(C(=O)N1)=O |
| 884         | 130324101504260317042803 | 2      |            | C1CNCCN1          |          | OC(C1=CSC(C(=O)N1)=O    |            | NCC1=CC=CS1               |          | OC(C1=CC(C)C(=O)N1)=O   |            | NCCN(C)C=CN=C1          |                      | OC(C@H)(C)Br)=O [R]  |
| 885         | 130324101504260817032802 | 2      |            | C1CNCCN1          |          | OC(C1=CSC(C(=O)N1)=O    |            | N(C@H)(C)C1=CC=CC=C1      |          | OC(C1=CSC(C(=O)N1)=O    |            | NCCO                    |                      | OC(C@H)(C)O)=O [S]   |
| 886         | 130324101509260317022803 | 2      |            | C1CNCCN1          |          | OC(C1=CSC(C(=O)N1)=O    |            | NCC1=CC=C(C(C(F)F)F)F=C1  |          | ClC(C)C=C(C@H)(C)C(O)=O |            | NCCN(C)C=CN=C1          |                      | ClC1=CC(C)O)=CC=C1   |
| 887         | 130324101509260417022807 | 2      |            | C1CNCCN1          |          | OC(C1=CSC(C(=O)N1)=O    |            | NCC1=CC=C(C(C(F)F)F)F=C1  |          | ClC(C)C=C(C@H)(C)C(O)=O |            | NCC1=CC(O)C(=O)C1       |                      | ClC1=CC(C)O)=CC=C1   |
| 888         | 130324101510260417032804 | 2      |            | C1CNCCN1          |          | OC(C1=CSC(C(=O)N1)=O    |            | CC(C)CCN                  |          | ClC(C)C=C(C@H)(C)C(O)=O |            | NCC1=CC=C1              |                      | OC(C@H)(C)O)=O [S]   |
| 889         | 130424011503260317022808 | 2      |            | NCC1=CC=C(C)C=C1  |          | ClC(C)C=C(C@H)(C)C(O)=O |            | NCC1=CC=CS1               |          | OC(C1=CC(C)C(=O)N1)=O   |            | BrC1=CC=C(C)N=C1        |                      | ClC1=CC(C)O)=CC=C1   |
| 890         | 130424011503260617032802 | 2      |            | NCC1=CC=C(C)C=C1  |          | ClC(C)C=C(C@H)(C)C(O)=O |            | NCC1=CC=CC=C1             |          | OC(C1=CC(C)C(=O)N1)=O   |            | NCCO                    |                      | OC(C@H)(C)O)=O [S]   |
| 891         | 130424011504260317022803 | 2      |            | NCC1=CC=C(C)C=C1  |          | ClC(C)C=C(C@H)(C)C(O)=O |            | NCC1=CC=CS1               |          | OC(C1=CC(C)C(=O)N1)=O   |            | NCCN(C)C=CN=C1          |                      | ClC1=CC(C)O)=CC=C1   |
| 892         | 130424011504260317102804 | 2      |            | NCC1=CC=C(C)C=C1  |          | ClC(C)C=C(C@H)(C)C(O)=O |            | NCC1=CC=CS1               |          | OC(C1=CC(C)C(=O)N1)=O   |            | N(C@H)(C)C1=CC=CC=C1[S  |                      | OC(C)C1=C(C)OC=C1    |
| 893         | 130424021502260217032802 | 2      |            | NCC1=CC=CN=C1     |          | ClC(C)C=C(C@H)(C)C(O)=O |            | NCC1=CC=C(S(=O)(=O)C)C=C1 |          | OC(C1=CC(C)C(=O)N1)=O   |            | NCCO                    |                      | OC(C@H)(C)O)=O [S]   |
| 894         | 130424021503260817022803 | 2      |            | NCC1=CC=C(C)C=C1  |          | ClC(C)C=C(C@H)(C)C(O)=O |            | N(C@H)(C)C1=CC=CC=C1      |          | OC(C1=CSC(C(=O)N1)=O    |            | NCCN(C)C=CN=C1          |                      | ClC1=CC(C)O)=CC=C1   |
| 895         | 130424021504260317032803 | 2      |            | NCC1=CC=CN=C1     |          | ClC(C)C=C(C@H)(C)C(O)=O |            | NCC1=CC=CS1               |          | OC(C1=CC(C)C(=O)N1)=O   |            | NCCN(C)C=CN=C1          |                      | OC(C@H)(C)O)=O [S]   |

| observation | full_mol_code2           | copies | Amines(X1) | Amines(X1)-smiles          | Acid(X1) | Acid(X1)-smiles        | Amines(X2) | Amines(X2)-smiles                       | Acid(X2) | Acid(X2)-smiles        | Amines(X3) | Amines(X3)-smiles                     | Structure of Pair... | Pair3 Acids                       |
|-------------|--------------------------|--------|------------|----------------------------|----------|------------------------|------------|-----------------------------------------|----------|------------------------|------------|---------------------------------------|----------------------|-----------------------------------|
| 896         | 130424021502260417092804 | 2      |            | <chem>NCC1=CC=CN=C1</chem> |          | <chem>ClCC(=O)O</chem> |            | <chem>NCC1=CC=CC=C1</chem>              |          | <chem>ClCC(=O)O</chem> |            | <chem>N[C@@H](C)C1=CC=CC=C1[R]</chem> |                      | <chem>CCC(O)=O</chem>             |
| 897         | 130424031501260217032802 | 2      |            | <chem>NCCCCO</chem>        |          | <chem>ClCC(=O)O</chem> |            | <chem>NCC1=CC=C(C(=O)O)C=C1</chem>      |          | <chem>ClCC(=O)O</chem> |            | <chem>NCCO</chem>                     |                      | <chem>CC([C@@H](C)O)=O</chem> [S] |
| 898         | 130424031501260217032803 | 2      |            | <chem>NCCCCO</chem>        |          | <chem>ClCC(=O)O</chem> |            | <chem>NCC1=CC=C(S(=O)(=O)C)C=C1</chem>  |          | <chem>ClCC(=O)O</chem> |            | <chem>NCCCN1=CC=CN=C1</chem>          |                      | <chem>CC([C@@H](C)O)=O</chem> [S] |
| 899         | 13042403150126017032802  | 2      |            | <chem>NCCCCO</chem>        |          | <chem>ClCC(=O)O</chem> |            | <chem>N[C@@H](C)C1=CC=CC=C1</chem>      |          | <chem>ClCC(=O)O</chem> |            | <chem>NCCO</chem>                     |                      | <chem>CC([C@@H](C)O)=O</chem> [S] |
| 900         | 130424031501260917092804 | 2      |            | <chem>NCCCCO</chem>        |          | <chem>ClCC(=O)O</chem> |            | <chem>NCC1=CC(F)=CC(C(F)(F)F)=C1</chem> |          | <chem>ClCC(=O)O</chem> |            | <chem>N[C@@H](C)C1=CC=CC=C1[R]</chem> |                      | <chem>CCC(O)=O</chem>             |
| 901         | 130424031501261017032809 | 2      |            | <chem>NCCCCO</chem>        |          | <chem>ClCC(=O)O</chem> |            | <chem>NCC1=CC=C(C)C=C1</chem>           |          | <chem>ClCC(=O)O</chem> |            | <chem>NCC1CCCC1</chem>                |                      | <chem>CC([C@@H](C)O)=O</chem> [S] |
| 902         | 130424031502260117102802 | 2      |            | <chem>NCCCCO</chem>        |          | <chem>ClCC(=O)O</chem> |            | <chem>NCCO</chem>                       |          | <chem>ClCC(=O)O</chem> |            | <chem>N[C@@H](C)C1=CC=CC=C1[S]</chem> |                      | <chem>ClCC1=CC(O)=O=CC=C1</chem>  |
| 903         | 130424031502260217032802 | 2      |            | <chem>NCCCCO</chem>        |          | <chem>ClCC(=O)O</chem> |            | <chem>NCC1=CC=C(S(=O)(=O)C)C=C1</chem>  |          | <chem>ClCC(=O)O</chem> |            | <chem>NCCO</chem>                     |                      | <chem>CC([C@@H](C)O)=O</chem> [S] |
| 904         | 130424031502260217032810 | 2      |            | <chem>NCCCCO</chem>        |          | <chem>ClCC(=O)O</chem> |            | <chem>NCC1=CC=C(S(=O)(=O)C)C=C1</chem>  |          | <chem>ClCC(=O)O</chem> |            | <chem>NCCCN1=CC=C(C)OC=C1</chem>      |                      | <chem>CC([C@@H](C)O)=O</chem> [S] |
| 905         | 130424031502260917032806 | 2      |            | <chem>NCCCCO</chem>        |          | <chem>ClCC(=O)O</chem> |            | <chem>NCC1=CC=C(C)C=C1</chem>           |          | <chem>ClCC(=O)O</chem> |            | <chem>N[C@@H](C)C1=CC=CC=C1</chem>    |                      | <chem>CC([C@@H](C)O)=O</chem> [S] |
| 906         | 130424031502261017102803 | 2      |            | <chem>NCCCCO</chem>        |          | <chem>ClCC(=O)O</chem> |            | <chem>NCC1=CC=C(C)C=C1</chem>           |          | <chem>ClCC(=O)O</chem> |            | <chem>N[C@@H](C)C1=CC=CC=C1[S]</chem> |                      | <chem>CC([C@@H](C)O)=O</chem> [S] |
| 907         | 130424031502260317032802 | 2      |            | <chem>NCCCCO</chem>        |          | <chem>ClCC(=O)O</chem> |            | <chem>NCC1=CC=CS1</chem>                |          | <chem>ClCC(=O)O</chem> |            | <chem>NCCO</chem>                     |                      | <chem>CC([C@@H](C)O)=O</chem> [S] |
| 908         | 130424031503260417092804 | 2      |            | <chem>NCCCCO</chem>        |          | <chem>ClCC(=O)O</chem> |            | <chem>NCCN(C)O</chem>                   |          | <chem>ClCC(=O)O</chem> |            | <chem>N[C@@H](C)C1=CC=CC=C1[R]</chem> |                      | <chem>CCC(O)=O</chem>             |
| 909         | 130424031503260517012803 | 2      |            | <chem>NCCCCO</chem>        |          | <chem>ClCC(=O)O</chem> |            | <chem>NCC(C)O</chem>                    |          | <chem>ClCC(=O)O</chem> |            | <chem>NCCCN1=CC=CN=C1</chem>          |                      | <chem>CC(C1=CC(O)=O)C=C1=O</chem> |
| 910         | 130424031503260617042802 | 2      |            | <chem>NCCCCO</chem>        |          | <chem>ClCC(=O)O</chem> |            | <chem>NCC1=CC=C(C)C=C1</chem>           |          | <chem>ClCC(=O)O</chem> |            | <chem>NCCO</chem>                     |                      | <chem>CC([C@@H](C)O)=O</chem> [R] |
| 911         | 130424031503261017042806 | 2      |            | <chem>NCCCCO</chem>        |          | <chem>ClCC(=O)O</chem> |            | <chem>NCC1=CC=C(C)C=C1</chem>           |          | <chem>ClCC(=O)O</chem> |            | <chem>N[C@@H](C)C1=CC=CC=C1</chem>    |                      | <chem>CC([C@@H](C)O)=O</chem> [R] |
| 912         | 130424031504260617012803 | 2      |            | <chem>NCCCCO</chem>        |          | <chem>ClCC(=O)O</chem> |            | <chem>NCC1=CC=C(C)C=C1</chem>           |          | <chem>ClCC(=O)O</chem> |            | <chem>NCCCN1=CC=CN=C1</chem>          |                      | <chem>CC(C1=CC(O)=O)C=C1=O</chem> |
| 913         | 130424031504260817032802 | 2      |            | <chem>NCCCCO</chem>        |          | <chem>ClCC(=O)O</chem> |            | <chem>N[C@@H](C)C1=CC=CC=C1</chem>      |          | <chem>ClCC(=O)O</chem> |            | <chem>NCCO</chem>                     |                      | <chem>CC([C@@H](C)O)=O</chem> [S] |
| 914         | 130424031506260217022802 | 2      |            | <chem>NCCCCO</chem>        |          | <chem>ClCC(=O)O</chem> |            | <chem>NCC1=CC=C(C)C=C1</chem>           |          | <chem>ClCC(=O)O</chem> |            | <chem>NCCO</chem>                     |                      | <chem>ClCC1=CC(O)=O=CC=C1</chem>  |
| 915         | 130424031506260217022803 | 2      |            | <chem>NCCCCO</chem>        |          | <chem>ClCC(=O)O</chem> |            | <chem>NCC1=CC=C(C)C=C1</chem>           |          | <chem>ClCC(=O)O</chem> |            | <chem>NCCCN1=CC=CN=C1</chem>          |                      | <chem>ClCC1=CC(O)=O=CC=C1</chem>  |
| 916         | 130424031506260317012803 | 2      |            | <chem>NCCCCO</chem>        |          | <chem>ClCC(=O)O</chem> |            | <chem>NCC1=CC=C(C)C=C1</chem>           |          | <chem>ClCC(=O)O</chem> |            | <chem>NCCCN1=CC=CN=C1</chem>          |                      | <chem>CC(C1=CC(O)=O)C=C1=O</chem> |
| 917         | 130424031506260417012803 | 2      |            | <chem>NCCCCO</chem>        |          | <chem>ClCC(=O)O</chem> |            | <chem>NCC1=CC=C(C)C=C1</chem>           |          | <chem>ClCC(=O)O</chem> |            | <chem>NCCCN1=CC=CN=C1</chem>          |                      | <chem>CC(C1=CC(O)=O)C=C1=O</chem> |
| 918         | 130424031506260417012804 | 2      |            | <chem>NCCCCO</chem>        |          | <chem>ClCC(=O)O</chem> |            | <chem>NCC1=CC=C(C)C=C1</chem>           |          | <chem>ClCC(=O)O</chem> |            | <chem>NCC1=CC=CO1</chem>              |                      | <chem>CC(C1=CC(O)=O)C=C1=O</chem> |
| 919         | 130424031506260417012806 | 2      |            | <chem>NCCCCO</chem>        |          | <chem>ClCC(=O)O</chem> |            | <chem>NCC1=CC=C(C)C=C1</chem>           |          | <chem>ClCC(=O)O</chem> |            | <chem>N[C@@H](C)C1=CC=CC=C1</chem>    |                      | <chem>CC(C1=CC(O)=O)C=C1=O</chem> |
| 920         | 130424031510260117102804 | 2      |            | <chem>NCCCCO</chem>        |          | <chem>ClCC(=O)O</chem> |            | <chem>CC(C)CN</chem>                    |          | <chem>ClCC(=O)O</chem> |            | <chem>N[C@@H](C)C1=CC=CC=C1[S]</chem> |                      | <chem>O=C(O)C1=C(C)OC=C1</chem>   |
| 921         | 130424031510260317012806 | 2      |            | <chem>NCCCCO</chem>        |          | <chem>ClCC(=O)O</chem> |            | <chem>CC(C)CN</chem>                    |          | <chem>ClCC(=O)O</chem> |            | <chem>N[C@@H](C)C1=CC=CC=C1</chem>    |                      | <chem>CC(C1=CC(O)=O)C=C1=O</chem> |
| 922         | 130424031510260417042805 | 2      |            | <chem>NCCCCO</chem>        |          | <chem>ClCC(=O)O</chem> |            | <chem>CC(C)CN</chem>                    |          | <chem>ClCC(=O)O</chem> |            | <chem>NCC1CCC(C)C=C2=C2O1</chem>      |                      | <chem>CC([C@@H](C)O)=O</chem> [R] |
| 923         | 130424041501260317012805 | 2      |            | <chem>NCC=C</chem>         |          | <chem>ClCC(=O)O</chem> |            | <chem>NCC1=CC=CS1</chem>                |          | <chem>ClCC(=O)O</chem> |            | <chem>NCC1CCC(C)C=C2=C2O1</chem>      |                      | <chem>CC(C1=CC(O)=O)C=C1=O</chem> |
| 924         | 130424041501260417022807 | 2      |            | <chem>NCC=C</chem>         |          | <chem>ClCC(=O)O</chem> |            | <chem>NCCN(C)O</chem>                   |          | <chem>ClCC(=O)O</chem> |            | <chem>NCC1=CC(C)C=C(C)OC=C1</chem>    |                      | <chem>ClCC1=CC(O)=O=CC=C1</chem>  |
| 925         | 130424041501260517032806 | 2      |            | <chem>NCC=C</chem>         |          | <chem>ClCC(=O)O</chem> |            | <chem>NCC(C)O</chem>                    |          | <chem>ClCC(=O)O</chem> |            | <chem>N[C@@H](C)C1=CC=CC=C1</chem>    |                      | <chem>CC([C@@H](C)O)=O</chem> [S] |
| 926         | 130424041501260517102804 | 2      |            | <chem>NCC=C</chem>         |          | <chem>ClCC(=O)O</chem> |            | <chem>NCC(C)O</chem>                    |          | <chem>ClCC(=O)O</chem> |            | <chem>N[C@@H](C)C1=CC=CC=C1[S]</chem> |                      | <chem>O=C(O)C1=C(C)OC=C1</chem>   |
| 927         | 130424041502260517022802 | 2      |            | <chem>NCC=C</chem>         |          | <chem>ClCC(=O)O</chem> |            | <chem>NCC1=CC=C(C)C=C1</chem>           |          | <chem>ClCC(=O)O</chem> |            | <chem>NCCO</chem>                     |                      | <chem>ClCC1=CC(O)=O=CC=C1</chem>  |
| 928         | 130424041502260717022803 | 2      |            | <chem>NCC=C</chem>         |          | <chem>ClCC(=O)O</chem> |            | <chem>NCC1=CC=C(N(C)C)C=C1</chem>       |          | <chem>ClCC(=O)O</chem> |            | <chem>NCCCN1=CC=CN=C1</chem>          |                      | <chem>ClCC1=CC(O)=O=CC=C1</chem>  |

| observation | full_mol_code2           | copies | Amines(X1) | Amines(X1):smiles | Acid(X1) | Acid(X1):smiles    | Amines(X2) | Amines(X2):smiles      | Acid(X2) | Acid(X2):smiles    | Amines(X3) | Amines(X3):smiles     | Structure of Pair... | Pair3Acids          |
|-------------|--------------------------|--------|------------|-------------------|----------|--------------------|------------|------------------------|----------|--------------------|------------|-----------------------|----------------------|---------------------|
| 929         | 130424041503260217032802 | 2      |            | NCC=C             |          | ClC(C)C=C(C)C(=O)O |            | NCC=C=C(S(=O)(=O)C)C=C |          | OC(C)=COC(C)N=O    |            | NCCO                  |                      | OC(C(=O)H)C(C)O [S] |
| 930         | 130424041503260417032802 | 2      |            | NCC=C             |          | ClC(C)C=C(C)C(=O)O |            | NCCN(C)C=O             |          | OC(C)=CC(C)C(C)C=O |            | NCCO                  |                      | OC(C(=O)H)C(C)O [S] |
| 931         | 130424041506260117032808 | 2      |            | NCC=C             |          | ClC(C)C=C(C)C(=O)O |            | NCC=C=C(C)C(F)F=C1     |          | ClC(C)C=C(C)C(=O)O |            | BrC1=CC=C(N)C=C1      |                      | OC(C(=O)H)C(C)O [S] |
| 932         | 130424041510260417012803 | 2      |            | NCC=C             |          | ClC(C)C=C(C)C(=O)O |            | CC(C)CCN               |          | ClC(C)C=C(C)C(=O)O |            | NCCCN=C=N=C1          |                      | OC(C1=CSC(C)N)O     |
| 933         | 130424051501260217012809 | 2      |            | NCC=C             |          | ClC(C)C=C(C)C(=O)O |            | NCC=C=C(S(=O)(=O)C)C=C |          | OC(C)=COC(C)N=O    |            | NCC1CCCC1             |                      | OC(C1=CSC(C)N)O     |
| 934         | 130424051501260717022803 | 2      |            | NCC=C             |          | ClC(C)C=C(C)C(=O)O |            | NCC=C=C(N)C(C)C=C1     |          | OC(C)=CSC(C)N=O    |            | NCCCN=C=C1            |                      | ClCC1=CC(C)O)O)CC=C |
| 935         | 130424051501260717022809 | 2      |            | NCC=C             |          | ClC(C)C=C(C)C(=O)O |            | NCC=C=C(N)C(C)C=C1     |          | OC(C)=CSC(C)N=O    |            | NCC1CCCC1             |                      | ClCC1=CC(C)O)O)CC=C |
| 936         | 130424051502260417032806 | 2      |            | NCC=C             |          | ClC(C)C=C(C)C(=O)O |            | NCCN(C)C=O             |          | OC(C)=CC(C)C(C)C=O |            | N(C)C(=O)C1=CC=CC=C1  |                      | OC(C(=O)H)C(C)O [S] |
| 937         | 130424051503260417042803 | 2      |            | NCC=C             |          | ClC(C)C=C(C)C(=O)O |            | NCCN(C)C=O             |          | OC(C)=CC(C)C(C)C=O |            | NCCCN=C=C1            |                      | OC(C(=O)H)C(C)O [R] |
| 938         | 130424051503260717032802 | 2      |            | NCC=C             |          | ClC(C)C=C(C)C(=O)O |            | NCC=C=C(N)C(C)C=C1     |          | OC(C)=COC(C)N=O    |            | NCCO                  |                      | OC(C(=O)H)C(C)O [S] |
| 939         | 130424051504260317032803 | 2      |            | NCC=C             |          | ClC(C)C=C(C)C(=O)O |            | NCC=C=C(S1)            |          | OC(C)=COC(C)N=O    |            | NCCCN=C=C1            |                      | OC(C(=O)H)C(C)O [S] |
| 940         | 130424051506260117032801 | 2      |            | NCC=C             |          | ClC(C)C=C(C)C(=O)O |            | NCC=C=C(C)C(F)F=C1     |          | ClC(C)C=C(C)C(=O)O |            | NCCC1=NC2=CC=CC=C21   |                      | OC(C(=O)H)C(C)O [S] |
| 941         | 130424051510260217032805 | 2      |            | NCC=C             |          | ClC(C)C=C(C)C(=O)O |            | CC(C)CCN               |          | ClC(C)C=C(C)C(=O)O |            | NCC1CCC(C)C=C2O1      |                      | OC(C(=O)H)C(C)O [S] |
| 942         | 130424061501260217102804 | 2      |            | NCC=C             |          | ClC(C)C=C(C)C(=O)O |            | NCC=C=C(S(=O)(=O)C)C=C |          | OC(C)=COC(C)N=O    |            | N(C)C(=O)C1=CC=CC=C1  |                      | O=C(O)C1=C(C)OC=C1  |
| 943         | 130424061501260717022809 | 2      |            | NCC=C             |          | ClC(C)C=C(C)C(=O)O |            | NCC=C=C(N)C(C)C=C1     |          | OC(C)=CSC(C)N=O    |            | NCC1CCCC1             |                      | ClCC1=CC(C)O)O)CC=C |
| 944         | 130424061504260317032803 | 2      |            | NCC=C             |          | ClC(C)C=C(C)C(=O)O |            | NCC=C=C(S1)            |          | OC(C)=COC(C)N=O    |            | NCCCN=C=C1            |                      | OC(C(=O)H)C(C)O [S] |
| 945         | 130424071501260217012803 | 2      |            | NCC=C             |          | ClC(C)C=C(C)C(=O)O |            | NCC=C=C(S(=O)(=O)C)C=C |          | OC(C)=COC(C)N=O    |            | NCCCN=C=C1            |                      | OC(C1=CSC(C)N)O     |
| 946         | 130424071501260317032802 | 2      |            | NCC=C             |          | ClC(C)C=C(C)C(=O)O |            | NCC=C=C(S1)            |          | OC(C)=COC(C)N=O    |            | NCCO                  |                      | OC(C(=O)H)C(C)O [S] |
| 947         | 130424071501260717022805 | 2      |            | NCC=C             |          | ClC(C)C=C(C)C(=O)O |            | NCC=C=C(N)C(C)C=C1     |          | OC(C)=CSC(C)N=O    |            | NCC1CCC(C)C=C2O1      |                      | ClCC1=CC(C)O)O)CC=C |
| 948         | 130424071501260917032808 | 2      |            | NCC=C             |          | ClC(C)C=C(C)C(=O)O |            | NCC=C=C(F)C(C)C(F)F=C1 |          | OC(C)=CSC(C)N=O    |            | BrC1=CC=C(N)C=C1      |                      | OC(C(=O)H)C(C)O [S] |
| 949         | 130424071501261017032803 | 2      |            | NCC=C             |          | ClC(C)C=C(C)C(=O)O |            | NCC=C=C(C)C=C1         |          | ClC(C)C=C(C)C(=O)O |            | NCCCN=C=C1            |                      | OC(C(=O)H)C(C)O [S] |
| 950         | 130424071502260517022810 | 2      |            | NCC=C             |          | ClC(C)C=C(C)C(=O)O |            | NCC(C)C(O)C            |          | OC(C)=CC(C)C(C)C=O |            | NCCC1=CC(C)OC(C)C=C1  |                      | ClCC1=CC(C)O)O)CC=C |
| 951         | 130424071502260817022803 | 2      |            | NCC=C             |          | ClC(C)C=C(C)C(=O)O |            | NCC=C=C(N)C(C)C=C1     |          | OC(C)=CSC(C)N=O    |            | NCCCN=C=C1            |                      | ClCC1=CC(C)O)O)CC=C |
| 952         | 130424071502260817022804 | 2      |            | NCC=C             |          | ClC(C)C=C(C)C(=O)O |            | N(C)C(=O)C1=CC=CC=C1   |          | OC(C)=CSC(C)N=O    |            | NCC1=CC=C(O)C=C1      |                      | ClCC1=CC(C)O)O)CC=C |
| 953         | 130424071502261017022803 | 2      |            | NCC=C             |          | ClC(C)C=C(C)C(=O)O |            | NCC=C=C(C)C=C1         |          | ClC(C)C=C(C)C(=O)O |            | NCCCN=C=C1            |                      | ClCC1=CC(C)O)O)CC=C |
| 954         | 130424071503260417022803 | 2      |            | NCC=C             |          | ClC(C)C=C(C)C(=O)O |            | NCCN(C)C=O             |          | OC(C)=CC(C)C(C)C=O |            | NCCCN=C=C1            |                      | ClCC1=CC(C)O)O)CC=C |
| 955         | 130424071503260417032806 | 2      |            | NCC=C             |          | ClC(C)C=C(C)C(=O)O |            | NCCN(C)C=O             |          | OC(C)=CC(C)C(C)C=O |            | N(C)C(=O)C1=CC=CC=C1  |                      | OC(C(=O)H)C(C)O [S] |
| 956         | 130424071503260817032804 | 2      |            | NCC=C             |          | ClC(C)C=C(C)C(=O)O |            | NCC=C=C(C)C=C1         |          | OC(C)=CC(C)C(C)C=O |            | NCC1=CC=C(O)C=C1      |                      | OC(C(=O)H)C(C)O [S] |
| 957         | 130424071503260817022803 | 2      |            | NCC=C             |          | ClC(C)C=C(C)C(=O)O |            | N(C)C(=O)C1=CC=CC=C1   |          | OC(C)=CSC(C)N=O    |            | NCCCN=C=C1            |                      | ClCC1=CC(C)O)O)CC=C |
| 958         | 130424071503260917022803 | 2      |            | NCC=C             |          | ClC(C)C=C(C)C(=O)O |            | NCC=C=C(F)C(C)C(F)F=C1 |          | OC(C)=CSC(C)N=O    |            | N(C)C(=O)C1=CC=CC=C1  |                      | OC(C(=O)H)C(C)O [S] |
| 959         | 130424071504260817022803 | 2      |            | NCC=C             |          | ClC(C)C=C(C)C(=O)O |            | N(C)C(=O)C1=CC=CC=C1   |          | OC(C)=CSC(C)N=O    |            | NCCCN=C=C1            |                      | ClCC1=CC(C)O)O)CC=C |
| 960         | 130424071504260817022810 | 2      |            | NCC=C             |          | ClC(C)C=C(C)C(=O)O |            | N(C)C(=O)C1=CC=CC=C1   |          | OC(C)=CSC(C)N=O    |            | NCCC1=CC(C)OC(C)OC=C1 |                      | ClCC1=CC(C)O)O)CC=C |
| 961         | 130424071504260817042805 | 2      |            | NCC=C             |          | ClC(C)C=C(C)C(=O)O |            | N(C)C(=O)C1=CC=CC=C1   |          | OC(C)=CSC(C)N=O    |            | NCC1CCC(C)C=C2O1      |                      | OC(C(=O)H)C(C)O [R] |

| observation | full_mol_code2           | copies | Amines(X1) | Amines(X1): smiles            | Acid(X1) | Acid(X1): smiles          | Amines(X2) | Amines(X2): smiles                    | Acid(X2) | Acid(X2): smiles          | Amines(X3) | Amines(X3): smiles                        | Structure of Pair... | Pair3Acids                              |
|-------------|--------------------------|--------|------------|-------------------------------|----------|---------------------------|------------|---------------------------------------|----------|---------------------------|------------|-------------------------------------------|----------------------|-----------------------------------------|
| 962         | 130424071509260117042803 | 2      |            | <chem>NCC1=CC=C(C)C=C1</chem> |          | <chem>ClC(C)C(=O)C</chem> |            | <chem>NCC1=CC=C(C)C=C1</chem>         |          | <chem>ClC(C)C(=O)C</chem> |            | <chem>NCCN1C=CN=C1</chem>                 |                      | <chem>OC(=O)C1=CC=C(C)C=C1</chem> [R]   |
| 963         | 130424071509260417042809 | 2      |            | <chem>NCC1=CC=C(C)C=C1</chem> |          | <chem>ClC(C)C(=O)C</chem> |            | <chem>NCC1=CC=C(C)C=C1</chem>         |          | <chem>ClC(C)C(=O)C</chem> |            | <chem>NCC1C=CC=C1</chem>                  |                      | <chem>OC(=O)C1=CC=C(C)C=C1</chem> [R]   |
| 964         | 130424071510260317102802 | 2      |            | <chem>NCC1=CC=C(C)C=C1</chem> |          | <chem>ClC(C)C(=O)C</chem> |            | <chem>CC(C)CN</chem>                  |          | <chem>ClC(C)C(=O)C</chem> |            | <chem>N[C@@H](C)C1=CC=C(C)C=C1</chem> [S] |                      | <chem>ClCC1=CC=C(C)C=C1</chem> [O] [CC] |
| 965         | 130424081501260217032803 | 2      |            | <chem>N1CCNCCC1</chem>        |          | <chem>ClC(C)C(=O)C</chem> |            | <chem>NCC1=CC=C(C)C=C1</chem>         |          | <chem>ClC(C)C(=O)C</chem> |            | <chem>NCCN1C=CN=C1</chem>                 |                      | <chem>OC(=O)C1=CC=C(C)C=C1</chem> [S]   |
| 966         | 130424081501260317032802 | 2      |            | <chem>N1CCNCCC1</chem>        |          | <chem>ClC(C)C(=O)C</chem> |            | <chem>NCC1=CC=C(C)C=C1</chem>         |          | <chem>ClC(C)C(=O)C</chem> |            | <chem>NCCO</chem>                         |                      | <chem>OC(=O)C1=CC=C(C)C=C1</chem> [S]   |
| 967         | 130424081501260417032805 | 2      |            | <chem>N1CCNCCC1</chem>        |          | <chem>ClC(C)C(=O)C</chem> |            | <chem>NCCN(C)C=O</chem>               |          | <chem>ClC(C)C(=O)C</chem> |            | <chem>NCC1C=CC=C(C)C=C1</chem> [S]        |                      | <chem>OC(=O)C1=CC=C(C)C=C1</chem> [S]   |
| 968         | 130424081501260717032804 | 2      |            | <chem>N1CCNCCC1</chem>        |          | <chem>ClC(C)C(=O)C</chem> |            | <chem>NCC1=CC=C(C)C=C1</chem>         |          | <chem>ClC(C)C(=O)C</chem> |            | <chem>NCC1C=CC=C1</chem>                  |                      | <chem>OC(=O)C1=CC=C(C)C=C1</chem> [S]   |
| 969         | 130424081501260717042803 | 2      |            | <chem>N1CCNCCC1</chem>        |          | <chem>ClC(C)C(=O)C</chem> |            | <chem>NCC1=CC=C(C)C=C1</chem>         |          | <chem>ClC(C)C(=O)C</chem> |            | <chem>NCCN1C=CC=C1</chem>                 |                      | <chem>OC(=O)C1=CC=C(C)C=C1</chem> [R]   |
| 970         | 130424081501260917022803 | 2      |            | <chem>N1CCNCCC1</chem>        |          | <chem>ClC(C)C(=O)C</chem> |            | <chem>NCC1=CC=C(C)C=C1</chem>         |          | <chem>ClC(C)C(=O)C</chem> |            | <chem>NCCN1C=CC=C1</chem>                 |                      | <chem>ClCC1=CC=C(C)C=C1</chem> [O] [CC] |
| 971         | 130424081502260717102804 | 2      |            | <chem>N1CCNCCC1</chem>        |          | <chem>ClC(C)C(=O)C</chem> |            | <chem>NCC1=CC=C(C)C=C1</chem>         |          | <chem>ClC(C)C(=O)C</chem> |            | <chem>N[C@@H](C)C1=CC=C(C)C=C1</chem> [S] |                      | <chem>O=C(O)C1=CC=C(C)C=C1</chem>       |
| 972         | 130424081503260317012803 | 2      |            | <chem>N1CCNCCC1</chem>        |          | <chem>ClC(C)C(=O)C</chem> |            | <chem>NCC1=CC=C(C)C=C1</chem>         |          | <chem>ClC(C)C(=O)C</chem> |            | <chem>NCCN1C=CC=C1</chem>                 |                      | <chem>OC(=O)C1=CC=C(C)C=C1</chem> [O]   |
| 973         | 130424081503260317032802 | 2      |            | <chem>N1CCNCCC1</chem>        |          | <chem>ClC(C)C(=O)C</chem> |            | <chem>NCC1=CC=C(C)C=C1</chem>         |          | <chem>ClC(C)C(=O)C</chem> |            | <chem>NCCO</chem>                         |                      | <chem>OC(=O)C1=CC=C(C)C=C1</chem> [S]   |
| 974         | 130424081503261017012803 | 2      |            | <chem>N1CCNCCC1</chem>        |          | <chem>ClC(C)C(=O)C</chem> |            | <chem>NCC1=CC=C(C)C=C1</chem>         |          | <chem>ClC(C)C(=O)C</chem> |            | <chem>NCCN1C=CC=C1</chem>                 |                      | <chem>OC(=O)C1=CC=C(C)C=C1</chem> [O]   |
| 975         | 130424081504260817042803 | 2      |            | <chem>N1CCNCCC1</chem>        |          | <chem>ClC(C)C(=O)C</chem> |            | <chem>NCC1=CC=C(C)C=C1</chem>         |          | <chem>ClC(C)C(=O)C</chem> |            | <chem>NCCN1C=CC=C1</chem>                 |                      | <chem>OC(=O)C1=CC=C(C)C=C1</chem> [R]   |
| 976         | 130424081504260917022804 | 2      |            | <chem>N1CCNCCC1</chem>        |          | <chem>ClC(C)C(=O)C</chem> |            | <chem>NCC1=CC=C(C)C=C1</chem>         |          | <chem>ClC(C)C(=O)C</chem> |            | <chem>N[C@@H](C)C1=CC=C(C)C=C1</chem> [R] |                      | <chem>CCC(O)=O</chem>                   |
| 977         | 130424081504261017032808 | 2      |            | <chem>N1CCNCCC1</chem>        |          | <chem>ClC(C)C(=O)C</chem> |            | <chem>NCC1=CC=C(C)C=C1</chem>         |          | <chem>ClC(C)C(=O)C</chem> |            | <chem>BC1=CC=C(C)C=C1</chem>              |                      | <chem>OC(=O)C1=CC=C(C)C=C1</chem> [S]   |
| 978         | 130424081509260417042803 | 2      |            | <chem>N1CCNCCC1</chem>        |          | <chem>ClC(C)C(=O)C</chem> |            | <chem>NCC1=CC=C(C)C=C1</chem>         |          | <chem>ClC(C)C(=O)C</chem> |            | <chem>NCCN1C=CC=C1</chem>                 |                      | <chem>OC(=O)C1=CC=C(C)C=C1</chem> [R]   |
| 979         | 130424081510260317022803 | 2      |            | <chem>N1CCNCCC1</chem>        |          | <chem>ClC(C)C(=O)C</chem> |            | <chem>CC(C)CN</chem>                  |          | <chem>ClC(C)C(=O)C</chem> |            | <chem>NCCN1C=CC=C1</chem>                 |                      | <chem>ClCC1=CC=C(C)C=C1</chem> [O] [CC] |
| 980         | 130424091501260717032802 | 2      |            | <chem>NCCN1C=CC=C1</chem>     |          | <chem>ClC(C)C(=O)C</chem> |            | <chem>NCC1=CC=C(C)C=C1</chem>         |          | <chem>ClC(C)C(=O)C</chem> |            | <chem>NCCO</chem>                         |                      | <chem>OC(=O)C1=CC=C(C)C=C1</chem> [S]   |
| 981         | 130424091501260917032801 | 2      |            | <chem>NCCN1C=CC=C1</chem>     |          | <chem>ClC(C)C(=O)C</chem> |            | <chem>NCC1=CC=C(C)C=C1</chem>         |          | <chem>ClC(C)C(=O)C</chem> |            | <chem>NCC1C=CC=C(C)C=C1</chem>            |                      | <chem>OC(=O)C1=CC=C(C)C=C1</chem> [S]   |
| 982         | 130424091501261017022805 | 2      |            | <chem>NCCN1C=CC=C1</chem>     |          | <chem>ClC(C)C(=O)C</chem> |            | <chem>NCC1=CC=C(C)C=C1</chem>         |          | <chem>ClC(C)C(=O)C</chem> |            | <chem>NCC1C=CC=C(C)C=C1</chem>            |                      | <chem>ClCC1=CC=C(C)C=C1</chem> [O] [CC] |
| 983         | 130424091502260317042803 | 2      |            | <chem>NCCN1C=CC=C1</chem>     |          | <chem>ClC(C)C(=O)C</chem> |            | <chem>NCC1=CC=C(C)C=C1</chem>         |          | <chem>ClC(C)C(=O)C</chem> |            | <chem>NCCN1C=CC=C1</chem>                 |                      | <chem>OC(=O)C1=CC=C(C)C=C1</chem> [R]   |
| 984         | 130424091502260417032810 | 2      |            | <chem>NCCN1C=CC=C1</chem>     |          | <chem>ClC(C)C(=O)C</chem> |            | <chem>NCCN(C)C=O</chem>               |          | <chem>ClC(C)C(=O)C</chem> |            | <chem>NCC1=CC=C(C)C=C1</chem>             |                      | <chem>OC(=O)C1=CC=C(C)C=C1</chem> [S]   |
| 985         | 130424091502260517032810 | 2      |            | <chem>NCCN1C=CC=C1</chem>     |          | <chem>ClC(C)C(=O)C</chem> |            | <chem>NCC(C)C=O</chem>                |          | <chem>ClC(C)C(=O)C</chem> |            | <chem>NCCN1C=CC=C1</chem>                 |                      | <chem>OC(=O)C1=CC=C(C)C=C1</chem> [S]   |
| 986         | 130424091502260717032802 | 2      |            | <chem>NCCN1C=CC=C1</chem>     |          | <chem>ClC(C)C(=O)C</chem> |            | <chem>NCC1=CC=C(C)C=C1</chem>         |          | <chem>ClC(C)C(=O)C</chem> |            | <chem>NCCO</chem>                         |                      | <chem>OC(=O)C1=CC=C(C)C=C1</chem> [S]   |
| 987         | 130424091503260117102804 | 2      |            | <chem>NCCN1C=CC=C1</chem>     |          | <chem>ClC(C)C(=O)C</chem> |            | <chem>NCCOC</chem>                    |          | <chem>ClC(C)C(=O)C</chem> |            | <chem>N[C@@H](C)C1=CC=C(C)C=C1</chem> [S] |                      | <chem>O=C(O)C1=CC=C(C)C=C1</chem>       |
| 988         | 130424091503260217022804 | 2      |            | <chem>NCCN1C=CC=C1</chem>     |          | <chem>ClC(C)C(=O)C</chem> |            | <chem>NCC1=CC=C(C)C=C1</chem>         |          | <chem>ClC(C)C(=O)C</chem> |            | <chem>NCC1C=CC=C1</chem>                  |                      | <chem>ClCC1=CC=C(C)C=C1</chem> [O] [CC] |
| 989         | 130424091503260917022804 | 2      |            | <chem>NCCN1C=CC=C1</chem>     |          | <chem>ClC(C)C(=O)C</chem> |            | <chem>NCC1=CC=C(C)C=C1</chem>         |          | <chem>ClC(C)C(=O)C</chem> |            | <chem>N[C@@H](C)C1=CC=C(C)C=C1</chem> [R] |                      | <chem>CCC(O)=O</chem>                   |
| 990         | 130424091503261017022803 | 2      |            | <chem>NCCN1C=CC=C1</chem>     |          | <chem>ClC(C)C(=O)C</chem> |            | <chem>NCC1=CC=C(C)C=C1</chem>         |          | <chem>ClC(C)C(=O)C</chem> |            | <chem>NCCN1C=CC=C1</chem>                 |                      | <chem>ClCC1=CC=C(C)C=C1</chem> [O] [CC] |
| 991         | 130424091503261017012806 | 2      |            | <chem>NCCN1C=CC=C1</chem>     |          | <chem>ClC(C)C(=O)C</chem> |            | <chem>NCC1=CC=C(C)C=C1</chem>         |          | <chem>ClC(C)C(=O)C</chem> |            | <chem>N[C@@H](C)C1=CC=C(C)C=C1</chem>     |                      | <chem>OC(=O)C1=CC=C(C)C=C1</chem> [O]   |
| 992         | 130424091503261017042803 | 2      |            | <chem>NCCN1C=CC=C1</chem>     |          | <chem>ClC(C)C(=O)C</chem> |            | <chem>NCC1=CC=C(C)C=C1</chem>         |          | <chem>ClC(C)C(=O)C</chem> |            | <chem>NCCN1C=CC=C1</chem>                 |                      | <chem>OC(=O)C1=CC=C(C)C=C1</chem> [R]   |
| 993         | 130424091504260517022804 | 2      |            | <chem>NCCN1C=CC=C1</chem>     |          | <chem>ClC(C)C(=O)C</chem> |            | <chem>NCC(C)C=O</chem>                |          | <chem>ClC(C)C(=O)C</chem> |            | <chem>N[C@@H](C)C1=CC=C(C)C=C1</chem> [R] |                      | <chem>CCC(O)=O</chem>                   |
| 994         | 130424091504260817042803 | 2      |            | <chem>NCCN1C=CC=C1</chem>     |          | <chem>ClC(C)C(=O)C</chem> |            | <chem>N[C@@H](C)C1=CC=C(C)C=C1</chem> |          | <chem>ClC(C)C(=O)C</chem> |            | <chem>NCCN1C=CC=C1</chem>                 |                      | <chem>OC(=O)C1=CC=C(C)C=C1</chem> [R]   |



| observation | full_mol_code2           | copies | Amines(X1) | Amines(X1):smiles | Acid(X1) | Acid(X1):smiles           | Amines(X2) | Amines(X2):smiles         | Acid(X2) | Acid(X2):smiles           | Amines(X3) | Amines(X3):smiles      | Structure of Pair... | Pair3Acids             |
|-------------|--------------------------|--------|------------|-------------------|----------|---------------------------|------------|---------------------------|----------|---------------------------|------------|------------------------|----------------------|------------------------|
| 995         | 130424091504261017012809 | 2      |            | NCCCN1C=CN=C1     |          | ClC(C)C=C(C)C@H(C)C(C)O=O |            | NCC1=CC=C(C)C=C1          |          | ClC(C)C=C(C)C@H(C)C(C)O=O |            | NCC1CCCCC1             |                      | OC(C1=C(C)C(C)C)=N1)O  |
| 996         | 130424091509260317012805 | 2      |            | NCCCN1C=CN=C1     |          | ClC(C)C=C(C)C@H(C)C(C)O=O |            | NCC1=CC=C(C)C(F)F=C1      |          | ClC(C)C=C(C)C@H(C)C(C)O=O |            | NCC1COO(C=C)C=C2)C2O1  |                      | OC(C1=C(C)C(C)C)=N1)O  |
| 997         | 130424091510260217012806 | 2      |            | NCCCN1C=CN=C1     |          | ClC(C)C=C(C)C@H(C)C(C)O=O |            | CC(C)CCN                  |          | ClC(C)C=C(C)C@H(C)C(C)O=O |            | N[C@@H](C)C1=CC=CC=C1  |                      | OC(C1=C(C)C(C)C)=N1)O  |
| 998         | 130424091510260217012804 | 2      |            | NCCCN1C=CN=C1     |          | ClC(C)C=C(C)C@H(C)C(C)O=O |            | CC(C)CCN                  |          | ClC(C)C=C(C)C@H(C)C(C)O=O |            | N[C@@H](C)C1=CC=CC=C1  |                      | O=C(O)C1=C(C)C(C)C=C1  |
| 999         | 130424101501260317032802 | 2      |            | C1CNCCN1          |          | ClC(C)C=C(C)C@H(C)C(C)O=O |            | NCC1=CC=C(S1)C=C1         |          | OC(C1=CC(C)C(C)C)=N1)O    |            | NCCO                   |                      | OC(C1=C(C)C(C)C)=O [S] |
| 1000        | 130424101501260517022807 | 2      |            | C1CNCCN1          |          | ClC(C)C=C(C)C@H(C)C(C)O=O |            | NCC(C)C(C)O               |          | OC(C1=CC=C(C)C(C)C)=O     |            | NCC1=CC(C)C=CC(C)C=C1  |                      | ClCC1=C(C)C(C)O=O)CC=C |
| 1001        | 130424101501260517032802 | 2      |            | C1CNCCN1          |          | ClC(C)C=C(C)C@H(C)C(C)O=O |            | NCC(C)C(C)O               |          | OC(C1=CC=C(C)C(C)C)=O     |            | NCCO                   |                      | OC(C1=C(C)C(C)C)=O [S] |
| 1002        | 13042410150126051702804  | 2      |            | C1CNCCN1          |          | ClC(C)C=C(C)C@H(C)C(C)O=O |            | NCC(C)C(C)O               |          | OC(C1=CC=C(C)C(C)C)=O     |            | N[C@@H](C)C1=CC=CC=C1  |                      | O=C(O)C1=C(C)C(C)C=C1  |
| 1003        | 130424101501260917012809 | 2      |            | C1CNCCN1          |          | ClC(C)C=C(C)C@H(C)C(C)O=O |            | NCC1=CC=CC=C1             |          | OC(C1=CC=C(C)C(C)C)=O     |            | NCC1CCCCC1             |                      | OC(C1=C(C)C(C)C)=N1)O  |
| 1004        | 130424101501260917042803 | 2      |            | C1CNCCN1          |          | ClC(C)C=C(C)C@H(C)C(C)O=O |            | NCC1=CC=CC=C1             |          | OC(C1=CC=C(C)C(C)C)=O     |            | NCCCN1C=CN=C1          |                      | OC(C1=C(C)C(C)C)=O [R] |
| 1005        | 130424101501260917042808 | 2      |            | C1CNCCN1          |          | ClC(C)C=C(C)C@H(C)C(C)O=O |            | NCC1=CC=CC=C1             |          | OC(C1=CC=C(C)C(C)C)=O     |            | BrC1=CC=C(C)C(N)C=C1   |                      | OC(C1=C(C)C(C)C)=O [R] |
| 1006        | 130424101501260917032802 | 2      |            | C1CNCCN1          |          | ClC(C)C=C(C)C@H(C)C(C)O=O |            | N[C@@H](C)C1=CC=CC=C1     |          | OC(C1=CC(C)C(C)C)=N1)O    |            | NCCO                   |                      | OC(C1=C(C)C(C)C)=O [S] |
| 1007        | 130424101502260217012803 | 2      |            | C1CNCCN1          |          | ClC(C)C=C(C)C@H(C)C(C)O=O |            | NCC1=CC=C(S(=O)(=O)C)C=C1 |          | OC(C1=CC(C)C(C)C)=N1)O    |            | NCCCN1C=CN=C1          |                      | OC(C1=C(C)C(C)C)=N1)O  |
| 1008        | 130424101502260317012804 | 2      |            | C1CNCCN1          |          | ClC(C)C=C(C)C@H(C)C(C)O=O |            | NCC1=CC=C(S1)C=C1         |          | OC(C1=CC(C)C(C)C)=N1)O    |            | NCC1=CC=CO1            |                      | OC(C1=C(C)C(C)C)=N1)O  |
| 1009        | 130424101502260517032801 | 2      |            | C1CNCCN1          |          | ClC(C)C=C(C)C@H(C)C(C)O=O |            | NCC(C)C(C)O               |          | OC(C1=CC=C(C)C(C)C)=O     |            | NCCCN1C=CC(C)C=C2)C2O1 |                      | OC(C1=C(C)C(C)C)=O [S] |
| 1010        | 130424101502260717022802 | 2      |            | C1CNCCN1          |          | ClC(C)C=C(C)C@H(C)C(C)O=O |            | NCC1=CC=C(N(C)C)C=C1      |          | OC(C1=C(C)C(C)C)=N1)O     |            | NCCO                   |                      | ClCC1=C(C)C(C)O=O)CC=C |
| 1011        | 130424101502260717022803 | 2      |            | C1CNCCN1          |          | ClC(C)C=C(C)C@H(C)C(C)O=O |            | NCC1=CC=C(N(C)C)C=C1      |          | OC(C1=C(C)C(C)C)=N1)O     |            | NCCCN1C=C1             |                      | ClCC1=C(C)C(C)O=O)CC=C |
| 1012        | 13042410150226091702804  | 2      |            | C1CNCCN1          |          | ClC(C)C=C(C)C@H(C)C(C)O=O |            | N[C@@H](C)C1=CC=CC=C1     |          | OC(C1=C(C)C(C)C)=N1)O     |            | N[C@@H](C)C1=CC=CC=C1  |                      | O=C(O)C1=C(C)C(C)C=C1  |
| 1013        | 130424101502260917032806 | 2      |            | C1CNCCN1          |          | ClC(C)C=C(C)C@H(C)C(C)O=O |            | NCC1=CC(F)C(C)C(F)F=C1    |          | OC(C1=C(C)C(C)C)=N1)O     |            | N[C@@H](C)C1=CC=CC=C1  |                      | OC(C1=C(C)C(C)C)=O [S] |
| 1014        | 130424101502261017012803 | 2      |            | C1CNCCN1          |          | ClC(C)C=C(C)C@H(C)C(C)O=O |            | NCC1=CC=C(C)C=C1          |          | ClC(C)C=C(C)C@H(C)C(C)O=O |            | NCCCN1C=CN=C1          |                      | OC(C1=C(C)C(C)C)=N1)O  |
| 1015        | 130424101503260417032807 | 2      |            | C1CNCCN1          |          | ClC(C)C=C(C)C@H(C)C(C)O=O |            | NCCN(C)C=O                |          | OC(C1=CC=C(C)C(C)C)=O     |            | NCC1=CC(C)C=CC(C)C=C1  |                      | OC(C1=C(C)C(C)C)=O [S] |
| 1016        | 130424101503260517012806 | 2      |            | C1CNCCN1          |          | ClC(C)C=C(C)C@H(C)C(C)O=O |            | NCC(C)C(C)O               |          | OC(C1=CC=C(C)C(C)C)=O     |            | N[C@@H](C)C1=CC=CC=C1  |                      | OC(C1=C(C)C(C)C)=N1)O  |
| 1017        | 130424101503260917032802 | 2      |            | C1CNCCN1          |          | ClC(C)C=C(C)C@H(C)C(C)O=O |            | NCC1=CC(F)C(C)C(F)F=C1    |          | OC(C1=C(C)C(C)C)=N1)O     |            | NCCO                   |                      | OC(C1=C(C)C(C)C)=O [S] |
| 1018        | 130424101503260917032804 | 2      |            | C1CNCCN1          |          | ClC(C)C=C(C)C@H(C)C(C)O=O |            | NCC1=CC(F)C(C)C(F)F=C1    |          | OC(C1=C(C)C(C)C)=N1)O     |            | N[C@@H](C)C1=CC=CC=C1  |                      | OC(C)O=O               |
| 1019        | 13042410150326091702804  | 2      |            | C1CNCCN1          |          | ClC(C)C=C(C)C@H(C)C(C)O=O |            | NCC1=CC(F)C(C)C(F)F=C1    |          | OC(C1=C(C)C(C)C)=N1)O     |            | N[C@@H](C)C1=CC=CC=C1  |                      | O=C(O)C1=C(C)C(C)C=C1  |
| 1020        | 130424101504260217032803 | 2      |            | C1CNCCN1          |          | ClC(C)C=C(C)C@H(H)C(C)O=O |            | NCC1=CC=C(S(=O)(=O)C)C=C1 |          | OC(C1=CC(C)C(C)C)=N1)O    |            | NCCCN1C=C1             |                      | OC(C1=C(C)C(C)C)=O [S] |
| 1021        | 130424101504260517032802 | 2      |            | C1CNCCN1          |          | ClC(C)C=C(C)C@H(H)C(C)O=O |            | NCC(C)C(C)O               |          | OC(C1=CC=C(C)C(C)C)=O     |            | NCCO                   |                      | OC(C1=C(C)C(C)C)=O [S] |
| 1022        | 130424101504260917022803 | 2      |            | C1CNCCN1          |          | ClC(C)C=C(C)C@H(H)C(C)O=O |            | NCC1=CC(F)C(C)C(F)F=C1    |          | OC(C1=C(C)C(C)C)=N1)O     |            | NCCCN1C=C1             |                      | ClCC1=C(C)C(C)O=O)CC=C |
| 1023        | 130424101509260117022804 | 2      |            | C1CNCCN1          |          | ClC(C)C=C(C)C@H(H)C(C)O=O |            | NCC1=CC=C(C)C(F)F=C1      |          | ClC(C)C=C(C)C@H(H)C(C)O=O |            | NCC1=CC=CO1            |                      | ClCC1=C(C)C(C)O=O)CC=C |
| 1024        | 13042410150926021702804  | 2      |            | C1CNCCN1          |          | ClC(C)C=C(C)C@H(H)C(C)O=O |            | NCC1=CC=C(C)C(F)F=C1      |          | ClC(C)C=C(C)C@H(H)C(C)O=O |            | N[C@@H](C)C1=CC=CC=C1  |                      | OC(C)O=O               |
| 1025        | 130424101509260217012804 | 2      |            | C1CNCCN1          |          | ClC(C)C=C(C)C@H(H)C(C)O=O |            | NCC1=CC=C(C)C(F)F=C1      |          | ClC(C)C=C(C)C@H(H)C(C)O=O |            | NCC1=CC=CO1            |                      | OC(C1=C(C)C(C)C)=N1)O  |
| 1026        | 130424101509260217012808 | 2      |            | C1CNCCN1          |          | ClC(C)C=C(C)C@H(H)C(C)O=O |            | NCC1=CC=C(C)C(F)F=C1      |          | ClC(C)C=C(C)C@H(H)C(C)O=O |            | BrC1=CC=C(C)C(N)C=C1   |                      | OC(C1=C(C)C(C)C)=N1)O  |
| 1027        | 13042410150926031702801  | 2      |            | C1CNCCN1          |          | ClC(C)C=C(C)C@H(H)C(C)O=O |            | NCC1=CC=C(C)C(F)F=C1      |          | ClC(C)C=C(C)C@H(H)C(C)O=O |            | N[C@@H](C)C1=CC=CC=C1  |                      | OC(C1=C(C)C(C)C)=N1)O  |

| observation | full_mol.code2            | copies | Amines(X1) | Amines(X1):smiles | Acid(X1) | Acid(X1):smiles          | Amines(X2) | Amines(X2):smiles        | Acid(X2) | Acid(X2):smiles          | Amines(X3) | Amines(X3):smiles        | Structure of Pair... | Pair3Acids            |
|-------------|---------------------------|--------|------------|-------------------|----------|--------------------------|------------|--------------------------|----------|--------------------------|------------|--------------------------|----------------------|-----------------------|
| 1028        | 130424101510260217022803  | 2      |            | C1CNCCN1          |          | ClC(C)C=C(C)C@H(C)C(O)=O |            | CC(C)CCN                 |          | ClC(C)C=C(C)C@H(C)C(O)=O |            | NCCCN1C=CN=C1            |                      | ClC(C)C=C(C)C(O)=CC=C |
| 1029        | 130424101510260417102802  | 2      |            | C1CNCCN1          |          | ClC(C)C=C(C)C@H(C)C(O)=O |            | CC(C)CCN                 |          | ClC(C)C=C(C)C@H(C)C(O)=O |            | N(C)C@H(C)C1=CC=CC=C1[S] |                      | ClC(C)C=C(O)=CC=C     |
| 1030        | 130924011502260217102804  | 2      |            | NCC1CCOCC1        |          | OC(C1=CC(C)C)=N1=O       |            | NCC1=CC=C(S(=O)(=O)C)C=C |          | OC(C1=CC(C)C)=N1=O       |            | N(C)C@H(C)C1=CC=CC=C1[S] |                      | O=C(O)C1=C(C)OC=C1    |
| 1031        | 130924011502260417032804  | 2      |            | NCC1CCOCC1        |          | OC(C1=CC(C)C)=N1=O       |            | NCCN(C)C=O               |          | OC(C1=CC(C)C)=N1=O       |            | NCC1=CC=C1               |                      | OC(C@H(C)C)C(O)=S     |
| 1032        | 130924011502260517092802  | 2      |            | NCC1CCOCC1        |          | OC(C1=CC(C)C)=N1=O       |            | NCC(C)C(O)C              |          | OC(C1=CC(C)C)=N1=O       |            | N(C)C@H(C)C1=CC=CC=C1[R] |                      | ClC(C)C=C(O)=CC=C     |
| 1033        | 1309240115062260217092802 | 2      |            | NCC1CCOCC1        |          | OC(C1=CC(C)C)=N1=O       |            | NCC1=CC=C(C)C(F)F=C1     |          | ClC(C)C=C(C)C@H(C)C(O)=O |            | N(C)C@H(C)C1=CC=CC=C1[R] |                      | ClC(C)C=C(O)=CC=C     |
| 1034        | 130924021501260417042806  | 2      |            | NCC1CCOCC1        |          | ClC(C)C=C(O)=CC=C1       |            | NCCN(C)C=O               |          | OC(C1=CC(C)C)C=C1=O      |            | N(C)C@H(C)C1=C=CC=C1     |                      | OC(C)C@H(C)C(O)=R     |
| 1035        | 130924011502260517092801  | 2      |            | NCC1CCOCC1        |          | ClC(C)C=C(O)=CC=C1       |            | NCC1=CC=C=C1             |          | OC(C1=CC(C)C)C=C1=O      |            | N(C)C@H(C)C1=C=CC=C1[R]  |                      | OC(C1=CSC(C)C)=N1=O   |
| 1036        | 130924021502260817032806  | 2      |            | NCC1CCOCC1        |          | ClC(C)C=C(O)=CC=C1       |            | N(C)C@H(C)C1=C=CC=C1     |          | OC(C1=CSC(C)C)=N1=O      |            | N(C)C@H(C)C1=C=CC=C1     |                      | OC(C)C@H(C)C(O)=S     |
| 1037        | 13092402150226081702803   | 2      |            | NCC1CCOCC1        |          | ClC(C)C=C(O)=CC=C1       |            | N(C)C@H(C)C1=C=CC=C1     |          | OC(C1=CSC(C)C)=N1=O      |            | N(C)C@H(C)C1=C=CC=C1[S]  |                      | OC(C)C@H(C)C(O)=S     |
| 1038        | 130924021502260917092802  | 2      |            | NCC1CCOCC1        |          | ClC(C)C=C(O)=CC=C1       |            | NCC1=CC(F)=CC(F)F=C1     |          | OC(C1=CSC(C)C)=N1=O      |            | N(C)C@H(C)C1=CC=CC=C1[R] |                      | ClC(C)C=C(O)=CC=C     |
| 1039        | 130924021504260517032809  | 2      |            | NCC1CCOCC1        |          | ClC(C)C=C(O)=CC=C1       |            | NCC1=CC=C=C1             |          | OC(C1=CC(C)C)C=C1=O      |            | NCC1CCOCC1               |                      | OC(C)C@H(C)C(O)=S     |
| 1040        | 130924021504260817102804  | 2      |            | NCC1CCOCC1        |          | ClC(C)C=C(O)=CC=C1       |            | NCC1=CC=C=C1             |          | OC(C1=CC(C)C)C=C1=O      |            | N(C)C@H(C)C1=CC=CC=C1[S] |                      | O=C(O)C1=C(C)OC=C1    |
| 1041        | 130924021504261017102804  | 2      |            | NCC1CCOCC1        |          | ClC(C)C=C(O)=CC=C1       |            | NCC1=CC=C=C1             |          | ClC(C)C=C(C)C@H(C)C(O)=O |            | N(C)C@H(C)C1=C=CC=C1[S]  |                      | O=C(O)C1=C(C)OC=C1    |
| 1042        | 1309240215062260117102804 | 2      |            | NCC1CCOCC1        |          | ClC(C)C=C(O)=CC=C1       |            | NCC1=CC=C(C)C(F)F=C1     |          | ClC(C)C=C(C)C@H(C)C(O)=O |            | N(C)C@H(C)C1=C=CC=C1[S]  |                      | O=C(O)C1=C(C)OC=C1    |
| 1043        | 1309240215062260417022806 | 2      |            | NCC1CCOCC1        |          | ClC(C)C=C(O)=CC=C1       |            | NCC1=CC=C(C)C(F)F=C1     |          | ClC(C)C=C(C)C@H(C)C(O)=O |            | N(C)C@H(C)C1=C=CC=C1     |                      | ClC(C)C=C(O)=CC=C     |
| 1044        | 130924031501260417042804  | 2      |            | NCC1CCOCC1        |          | OC(C1=CSC(C)C)=N1=O      |            | NCCN(C)C=O               |          | OC(C1=CC(C)C)C=C1=O      |            | NCC1=CC=C1               |                      | OC(C)C@H(C)C(O)=R     |
| 1045        | 130924031501260517102802  | 2      |            | NCC1CCOCC1        |          | OC(C1=CSC(C)C)=N1=O      |            | NCC(C)C(O)C              |          | OC(C1=CC(C)C)C=C1=O      |            | N(C)C@H(C)C1=C=CC=C1[S]  |                      | ClC(C)C=C(O)=CC=C     |
| 1046        | 130924031501260817032801  | 2      |            | NCC1CCOCC1        |          | OC(C1=CSC(C)C)=N1=O      |            | NCC1=CC=C=C1             |          | OC(C1=CC(C)C)C=C1=O      |            | NCC1=CNC2=CC=CC=C2       |                      | OC(C)C@H(C)C(O)=S     |
| 1047        | 130924031501260917042804  | 2      |            | NCC1CCOCC1        |          | OC(C1=CSC(C)C)=N1=O      |            | NCC1=CC=C=C1             |          | OC(C1=CC(C)C)C=C1=O      |            | NCC1=CC=C1               |                      | OC(C)C@H(C)C(O)=R     |
| 1048        | 130924031501260717032807  | 2      |            | NCC1CCOCC1        |          | OC(C1=CSC(C)C)=N1=O      |            | NCC1=CC=C(N)C(C)C=C1     |          | OC(C1=CSC(C)C)=N1=O      |            | NCC1=CC(C)C(C)C=C1       |                      | OC(C)C@H(C)C(O)=S     |
| 1049        | 130924031501260717092803  | 2      |            | NCC1CCOCC1        |          | OC(C1=CSC(C)C)=N1=O      |            | NCC1=CC=C(N)C(C)C=C1     |          | OC(C1=CSC(C)C)=N1=O      |            | N(C)C@H(C)C1=C=CC=C1[R]  |                      | OC(C)C@H(C)C(O)=S     |
| 1050        | 130924031501260717092804  | 2      |            | NCC1CCOCC1        |          | OC(C1=CSC(C)C)=N1=O      |            | NCC1=CC=C(N)C(C)C=C1     |          | OC(C1=CSC(C)C)=N1=O      |            | N(C)C@H(C)C1=C=CC=C1[R]  |                      | CCC(O)=O              |
| 1051        | 130924031502260217012804  | 2      |            | NCC1CCOCC1        |          | OC(C1=CSC(C)C)=N1=O      |            | NCC1=CC=C(S(=O)(=O)C)C=C |          | OC(C1=CC(C)C)=N1=O       |            | NCC1=CC=C1               |                      | OC(C1=CSC(C)C)=N1=O   |
| 1052        | 130924031502260417022804  | 2      |            | NCC1CCOCC1        |          | OC(C1=CSC(C)C)=N1=O      |            | NCCN(C)C=O               |          | OC(C1=CC(C)C)C=C1=O      |            | NCC1=CC=C1               |                      | ClC(C)C=C(O)=CC=C     |
| 1053        | 130924031502260517032802  | 2      |            | NCC1CCOCC1        |          | OC(C1=CSC(C)C)=N1=O      |            | NCC(C)C(O)C              |          | OC(C1=CC(C)C)C=C1=O      |            | NCCO                     |                      | OC(C)C@H(C)C(O)=S     |
| 1054        | 130924031502260817012803  | 2      |            | NCC1CCOCC1        |          | OC(C1=CSC(C)C)=N1=O      |            | N(C)C@H(C)C1=C=CC=C1     |          | OC(C1=CSC(C)C)=N1=O      |            | NCCCN1C=CN=C1            |                      | OC(C1=CSC(C)C)=N1=O   |
| 1055        | 130924031502261017012808  | 2      |            | NCC1CCOCC1        |          | OC(C1=CSC(C)C)=N1=O      |            | NCC1=CC=C(C)C=C1         |          | ClC(C)C=C(C)C@H(C)C(O)=O |            | BrC1=CC=C(C)C=C1         |                      | OC(C1=CSC(C)C)=N1=O   |
| 1056        | 130924031502261017032801  | 2      |            | NCC1CCOCC1        |          | OC(C1=CSC(C)C)=N1=O      |            | NCC1=CC=C(C)C=C1         |          | ClC(C)C=C(C)C@H(C)C(O)=O |            | NCC1=CNC2=CC=CC=C2       |                      | OC(C)C@H(C)C(O)=S     |
| 1057        | 130924031502261017092804  | 2      |            | NCC1CCOCC1        |          | OC(C1=CSC(C)C)=N1=O      |            | NCC1=CC=C(C)C=C1         |          | ClC(C)C=C(C)C@H(C)C(O)=O |            | N(C)C@H(C)C1=C=CC=C1[R]  |                      | CCC(O)=O              |
| 1058        | 130924031503260317032802  | 2      |            | NCC1CCOCC1        |          | OC(C1=CSC(C)C)=N1=O      |            | NCC1=CC=C=S1             |          | OC(C1=CC(C)C)=N1=O       |            | NCCO                     |                      | OC(C)C@H(C)C(O)=S     |
| 1059        | 130924031503260317032805  | 2      |            | NCC1CCOCC1        |          | OC(C1=CSC(C)C)=N1=O      |            | NCC1=CC=C=S1             |          | OC(C1=CC(C)C)=N1=O       |            | NCC1CC(C)C=C2            |                      | OC(C)C@H(C)C(O)=S     |
| 1060        | 130924031503260317102804  | 2      |            | NCC1CCOCC1        |          | OC(C1=CSC(C)C)=N1=O      |            | NCC1=CC=C=S1             |          | OC(C1=CC(C)C)=N1=O       |            | N(C)C@H(C)C1=C=CC=C1[S]  |                      | O=C(O)C1=C(C)OC=C1    |

| observation | full_mol_code2           | copies | Amines(X1) | Amines(X1):smiles   | Acid(X1) | Acid(X1):smiles         | Amines(X2) | Amines(X2):smiles         | Acid(X2) | Acid(X2):smiles      | Amines(X3) | Amines(X3):smiles         | Structure of Pair... | Pair3Acids             |
|-------------|--------------------------|--------|------------|---------------------|----------|-------------------------|------------|---------------------------|----------|----------------------|------------|---------------------------|----------------------|------------------------|
| 1061        | 130924031503260817102802 | 2      |            | NCCC1CCCCC1         |          | OC(C1=CSC(C(=O)N)=O     |            | NCC1=CC=CC=C1             |          | OC(C1=CC=C(C(=O)N)=O |            | N[C@@H](C)C1=CC=CC=C1 [S] |                      | ClCC1=CC(C(=O)O)=CC=C1 |
| 1062        | 130924031503260817092804 | 2      |            | NCCC1CCCCC1         |          | OC(C1=CSC(C(=O)N)=O     |            | N[C@@H](C)C1=CC=CC=C1     |          | OC(C1=CSC(C(=O)N)=O  |            | N[C@@H](C)C1=CC=CC=C1 [R] |                      | CCC(O)=O               |
| 1063        | 130924031504260317022803 | 2      |            | NCCC1CCCCC1         |          | OC(C1=CSC(C(=O)N)=O     |            | NCC1=CC=CC=C1             |          | OC(C1=CC=C(C(=O)N)=O |            | NCCCN1C=CN=C1             |                      | ClCC1=CC(C(=O)O)=CC=C1 |
| 1064        | 130924031504260317092803 | 2      |            | NCCC1CCCCC1         |          | OC(C1=CSC(C(=O)N)=O     |            | NCC1=CC=CC=C1             |          | OC(C1=CC=C(C(=O)N)=O |            | N[C@@H](C)C1=CC=CC=C1 [R] |                      | OC(C1=CSC(C(=O)N)=O    |
| 1065        | 130924031504260517032803 | 2      |            | NCCC1CCCCC1         |          | OC(C1=CSC(C(=O)N)=O     |            | NCC(C)C(O)C               |          | OC(C1=CC=C(C(=O)N)=O |            | NCCCN1C=CN=C1             |                      | OC(C1=CSC(C(=O)N)=O    |
| 1066        | 130924031509260117012803 | 2      |            | NCCC1CCCCC1         |          | OC(C1=CSC(C(=O)N)=O     |            | NCC1=CC=C(C(F)F)F=C1      |          | OC(C1=CC=C(C(=O)N)=O |            | NCCCN1C=CN=C1             |                      | OC(C1=CSC(C(=O)N)=O    |
| 1067        | 130924031509260217012803 | 2      |            | NCCC1CCCCC1         |          | OC(C1=CSC(C(=O)N)=O     |            | NCC1=CC=C(C(F)F)F=C1      |          | OC(C1=CC=C(C(=O)N)=O |            | NCCCN1C=CN=C1             |                      | OC(C1=CSC(C(=O)N)=O    |
| 1068        | 130924031509260217032804 | 2      |            | NCCC1CCCCC1         |          | OC(C1=CSC(C(=O)N)=O     |            | NCC1=CC=C(C(F)F)F=C1      |          | OC(C1=CC=C(C(=O)N)=O |            | NCC1=CC=CC=C1             |                      | OC(C1=CSC(C(=O)N)=O    |
| 1069        | 130924031510260317012803 | 2      |            | NCCC1CCCCC1         |          | OC(C1=CSC(C(=O)N)=O     |            | CC(C)CCN                  |          | OC(C1=CC=C(C(=O)N)=O |            | NCCCN1C=CN=C1             |                      | OC(C1=CSC(C(=O)N)=O    |
| 1070        | 130924041501260817102804 | 2      |            | NCCC1CCCCC1         |          | ClC(C)C=C(C1=CC=CC=C1)O |            | N[C@@H](C)C1=CC=CC=C1     |          | OC(C1=CSC(C(=O)N)=O  |            | N[C@@H](C)C1=CC=CC=C1 [S] |                      | O=C(O)C1=C(C(=O)O)C=C1 |
| 1071        | 130924041501260917012803 | 2      |            | NCCC1CCCCC1         |          | ClC(C)C=C(C1=CC=CC=C1)O |            | NCC1=CC=C(C(F)F)F=C1      |          | OC(C1=CSC(C(=O)N)=O  |            | NCCCN1C=CN=C1             |                      | OC(C1=CSC(C(=O)N)=O    |
| 1072        | 130924041501260917032808 | 2      |            | NCCC1CCCCC1         |          | ClC(C)C=C(C1=CC=CC=C1)O |            | NCC1=CC=C(C(F)F)F=C1      |          | OC(C1=CSC(C(=O)N)=O  |            | BrC1=CC=C(C(N)=O)C=C1     |                      | OC(C1=CSC(C(=O)N)=O    |
| 1073        | 130924041501261017102802 | 2      |            | NCCC1CCCCC1         |          | ClC(C)C=C(C1=CC=CC=C1)O |            | NCC1=CC=C(C)C=C1          |          | OC(C1=CC=C(C(=O)N)=O |            | N[C@@H](C)C1=CC=CC=C1 [S] |                      | ClCC1=CC(C(=O)O)=CC=C1 |
| 1074        | 130924041502260217092804 | 2      |            | NCCC1CCCCC1         |          | ClC(C)C=C(C1=CC=CC=C1)O |            | NCC1=CC=C(S(=O)(=O)C)C=C1 |          | OC(C1=CC=C(C(=O)N)=O |            | N[C@@H](C)C1=CC=CC=C1 [R] |                      | CCC(O)=O               |
| 1075        | 130924041502260317032809 | 2      |            | NCCC1CCCCC1         |          | ClC(C)C=C(C1=CC=CC=C1)O |            | NCC1=CC=CC=C1             |          | OC(C1=CC=C(C(=O)N)=O |            | NCC1CCCCC1                |                      | OC(C1=CSC(C(=O)N)=O    |
| 1076        | 130924041502260817012808 | 2      |            | NCCC1CCCCC1         |          | ClC(C)C=C(C1=CC=CC=C1)O |            | N[C@@H](C)C1=CC=CC=C1     |          | OC(C1=CSC(C(=O)N)=O  |            | BrC1=CC=C(C(N)=O)C=C1     |                      | OC(C1=CSC(C(=O)N)=O    |
| 1077        | 130924041502260217032802 | 2      |            | NCCC1CCCCC1         |          | ClC(C)C=C(C1=CC=CC=C1)O |            | NCC1=CC=C(C(F)F)F=C1      |          | OC(C1=CC=C(C(=O)N)=O |            | NCCO                      |                      | OC(C1=CSC(C(=O)N)=O    |
| 1078        | 130924041503260917042803 | 2      |            | NCCC1CCCCC1         |          | ClC(C)C=C(C1=CC=CC=C1)O |            | NCC1=CC=C(C(F)F)F=C1      |          | OC(C1=CSC(C(=O)N)=O  |            | NCCCN1C=CN=C1             |                      | OC(C1=CSC(C(=O)N)=O    |
| 1079        | 13092404150426017032801  | 2      |            | NCCC1CCCCC1         |          | ClC(C)C=C(C1=CC=CC=C1)O |            | NCC1=CC=C(C)C=C1          |          | OC(C1=CC=C(C(=O)N)=O |            | NCCCN1=CNC2=CC=CC=C2      |                      | OC(C1=CSC(C(=O)N)=O    |
| 1080        | 130924041509260217032802 | 2      |            | NCCC1CCCCC1         |          | ClC(C)C=C(C1=CC=CC=C1)O |            | NCC1=CC=C(C(F)F)F=C1      |          | OC(C1=CC=C(C(=O)N)=O |            | NCCO                      |                      | OC(C1=CSC(C(=O)N)=O    |
| 1081        | 130924041509260217032809 | 2      |            | NCCC1CCCCC1         |          | ClC(C)C=C(C1=CC=CC=C1)O |            | NCC1=CC=C(C(F)F)F=C1      |          | OC(C1=CC=C(C(=O)N)=O |            | NCC1CCCCC1                |                      | OC(C1=CSC(C(=O)N)=O    |
| 1082        | 130924041510260317022806 | 2      |            | NCCC1CCCCC1         |          | ClC(C)C=C(C1=CC=CC=C1)O |            | CC(C)CCN                  |          | OC(C1=CC=C(C(=O)N)=O |            | N[C@@H](C)C1=CC=CC=C1     |                      | ClCC1=CC(C(=O)O)=CC=C1 |
| 1083        | 130924041510260317092803 | 2      |            | NCCC1CCCCC1         |          | ClC(C)C=C(C1=CC=CC=C1)O |            | CC(C)CCN                  |          | OC(C1=CC=C(C(=O)N)=O |            | N[C@@H](C)C1=CC=CC=C1 [R] |                      | OC(C1=CSC(C(=O)N)=O    |
| 1084        | 130924041510260417032805 | 2      |            | NCCC1CCCCC1         |          | ClC(C)C=C(C1=CC=CC=C1)O |            | CC(C)CCN                  |          | OC(C1=CC=C(C(=O)N)=O |            | NCC1OCC(C=O)C=C2O1        |                      | OC(C1=CSC(C(=O)N)=O    |
| 1085        | 131024011501260417022809 | 2      |            | NCC1=CC(F)=C(F)C=C1 |          | OC(C1=CSC(C(=O)N)=O     |            | NCCNC(C)=O                |          | OC(C1=CC=C(C(=O)N)=O |            | NCC1CCCCC1                |                      | ClCC1=CC(C(=O)O)=CC=C1 |
| 1086        | 131024011501261017032803 | 2      |            | NCC1=CC(F)=C(F)C=C1 |          | OC(C1=CSC(C(=O)N)=O     |            | NCC1=CC=C(C)C=C1          |          | OC(C1=CC=C(C(=O)N)=O |            | NCCCN1C=CN=C1             |                      | OC(C1=CSC(C(=O)N)=O    |
| 1087        | 131024011502260217032802 | 2      |            | NCC1=CC(F)=C(F)C=C1 |          | OC(C1=CSC(C(=O)N)=O     |            | NCC1=CC=C(S(=O)(=O)C)C=C1 |          | OC(C1=CC=C(C(=O)N)=O |            | NCCO                      |                      | OC(C1=CSC(C(=O)N)=O    |
| 1088        | 131024011502260417022809 | 2      |            | NCC1=CC(F)=C(F)C=C1 |          | OC(C1=CSC(C(=O)N)=O     |            | NCCNC(C)=O                |          | OC(C1=CC=C(C(=O)N)=O |            | NCC1CCCCC1                |                      | ClCC1=CC(C(=O)O)=CC=C1 |
| 1089        | 131024011502260917012803 | 2      |            | NCC1=CC(F)=C(F)C=C1 |          | OC(C1=CSC(C(=O)N)=O     |            | NCC1=CC=C(C)C=C1          |          | OC(C1=CC=C(C(=O)N)=O |            | NCCCN1C=CN=C1             |                      | OC(C1=CSC(C(=O)N)=O    |
| 1090        | 131024011502260717042805 | 2      |            | NCC1=CC(F)=C(F)C=C1 |          | OC(C1=CSC(C(=O)N)=O     |            | NCC1=CC=C(N(C)C)C=C1      |          | OC(C1=CSC(C(=O)N)=O  |            | NCC1OCC(C=O)C=C2O1        |                      | OC(C1=CSC(C(=O)N)=O    |
| 1091        | 131024011503260717032802 | 2      |            | NCC1=CC(F)=C(F)C=C1 |          | OC(C1=CSC(C(=O)N)=O     |            | NCC1=CC=C(N(C)C)C=C1      |          | OC(C1=CSC(C(=O)N)=O  |            | NCCO                      |                      | OC(C1=CSC(C(=O)N)=O    |
| 1092        | 131024011503260717102804 | 2      |            | NCC1=CC(F)=C(F)C=C1 |          | OC(C1=CSC(C(=O)N)=O     |            | NCC1=CC=C(N(C)C)C=C1      |          | OC(C1=CSC(C(=O)N)=O  |            | N[C@@H](C)C1=CC=CC=C1 [S] |                      | O=C(O)C1=C(C(=O)O)C=C1 |
| 1093        | 131024011504260617012803 | 2      |            | NCC1=CC(F)=C(F)C=C1 |          | OC(C1=CSC(C(=O)N)=O     |            | NCC1=CC=C(C)C=C1          |          | OC(C1=CC=C(C(=O)N)=O |            | NCCCN1C=CN=C1             |                      | OC(C1=CSC(C(=O)N)=O    |



| observation | full_mol_code2           | copies | Amines(X1) | Amines(X1):smiles   | Acid(X1) | Acid(X1):smiles         | Amines(X2) | Amines(X2):smiles         | Acid(X2) | Acid(X2):smiles               | Amines(X3) | Amines(X3):smiles    | Structure of Pair... | Pair3Acids             |
|-------------|--------------------------|--------|------------|---------------------|----------|-------------------------|------------|---------------------------|----------|-------------------------------|------------|----------------------|----------------------|------------------------|
| 1094        | 131024011504260717032801 | 2      |            | NCC1=CC(F)=C(F)C=C1 |          | OC(C1=CC(F)=C(F)C=C1)=O |            | NCC1=CC=C(N)C(C)C=C1      |          | OC(C1=CC(F)=C(F)C=C1)=O       |            | NCCC1=CNC2=CC=CC=C2  |                      | OC([C@H](C)C)=O [S]    |
| 1095        | 131024021501260417102803 | 2      |            | NCC1=CC(F)=C(F)C=C1 |          | ClCC1=CC(C(O)=O)=CC=C1  |            | NCCN(C)C=O                |          | OC(C1=CC=C(C)C=C1)=O          |            | NCCCN1=CN=C1         |                      | OC(C1=CC=C(C)C=C1)=O   |
| 1096        | 131024021501260517032802 | 2      |            | NCC1=CC(F)=C(F)C=C1 |          | ClCC1=CC(C(O)=O)=CC=C1  |            | NCC1=CC=C(C)C=C1          |          | OC(C1=CC=C(C)C=C1)=O          |            | NCCO                 |                      | OC([C@H](C)C)=O [S]    |
| 1097        | 131024021501260717032802 | 2      |            | NCC1=CC(F)=C(F)C=C1 |          | ClCC1=CC(C(O)=O)=CC=C1  |            | NCC1=CC=C(N(C)C)C=C1      |          | OC(C1=CSC(C)C=C1)=O           |            | NCCO                 |                      | OC([C@H](C)C)=O [S]    |
| 1098        | 131024021501261017022806 | 2      |            | NCC1=CC(F)=C(F)C=C1 |          | ClCC1=CC(C(O)=O)=CC=C1  |            | NCC1=CC=C(C)C=C1          |          | ClC(C)=C(C)C([C@H](C)C)C(O)=O |            | N[C@H](C)C1=CC=CC=C1 |                      | ClCC1=CC(C(O)=O)=CC=C1 |
| 1099        | 131024021501261017032803 | 2      |            | NCC1=CC(F)=C(F)C=C1 |          | ClCC1=CC(C(O)=O)=CC=C1  |            | NCC1=CC=C(C)C=C1          |          | ClC(C)=C(C)C([C@H](C)C)C(O)=O |            | NCCCN1C=C1           |                      | OC([C@H](C)C)=O [S]    |
| 1100        | 131024021502260117032803 | 2      |            | NCC1=CC(F)=C(F)C=C1 |          | ClCC1=CC(C(O)=O)=CC=C1  |            | NCCOC                     |          | OC(C1=CC(C)C=C1)=O            |            | NCCCN1C=C1           |                      | OC([C@H](C)C)=O [S]    |
| 1101        | 131024021502260217032804 | 2      |            | NCC1=CC(F)=C(F)C=C1 |          | ClCC1=CC(C(O)=O)=CC=C1  |            | NCC1=CC=C(S(=O)(=O)C)C=C1 |          | OC(C1=CC(C)C=C1)=O            |            | NCC1=CC=C1           |                      | OC([C@H](C)C)=O [S]    |
| 1102        | 131024021502260717092803 | 2      |            | NCC1=CC(F)=C(F)C=C1 |          | ClCC1=CC(C(O)=O)=CC=C1  |            | NCC1=CC=C(N(C)C)C=C1      |          | OC(C1=CSC(C)C=C1)=O           |            | N[C@H](C)C1=CC=CC=C1 |                      | OC([C@H](C)C)=O [S]    |
| 1103        | 131024021502260417092804 | 2      |            | NCC1=CC(F)=C(F)C=C1 |          | ClCC1=CC(C(O)=O)=CC=C1  |            | NCC1=CC=C(C)C=C1          |          | ClC(C)=C(C)C([C@H](C)C)C(O)=O |            | N[C@H](C)C1=CC=CC=C1 |                      | CCC(O)=O               |
| 1104        | 131024021502260417102803 | 2      |            | NCC1=CC(F)=C(F)C=C1 |          | ClCC1=CC(C(O)=O)=CC=C1  |            | NCCN(C)C=O                |          | OC(C1=CC=C(C)C=C1)=O          |            | N[C@H](C)C1=CC=CC=C1 |                      | OC([C@H](C)C)=O [S]    |
| 1105        | 131024021502260517022803 | 2      |            | NCC1=CC(F)=C(F)C=C1 |          | ClCC1=CC(C(O)=O)=CC=C1  |            | NCC1=CC=C(C)C=C1          |          | OC(C1=CC=C(C)C=C1)=O          |            | NCCCN1C=C1           |                      | ClCC1=CC(C(O)=O)=CC=C1 |
| 1106        | 131024021503260917042803 | 2      |            | NCC1=CC(F)=C(F)C=C1 |          | ClCC1=CC(C(O)=O)=CC=C1  |            | NCC1=CC(F)=CC(C(F)F)C=C1  |          | OC(C1=CSC(C)C=C1)=O           |            | NCCCN1C=C1           |                      | OC([C@H](C)C)Br [R]    |
| 1107        | 131024021509260117032804 | 2      |            | NCC1=CC(F)=C(F)C=C1 |          | ClCC1=CC(C(O)=O)=CC=C1  |            | NCC1=CC=C(C)C(F)C=C1      |          | ClC(C)=C(C)C([C@H](C)C)C(O)=O |            | NCC1=CC=C1           |                      | OC([C@H](C)C)=O [S]    |
| 1108        | 131024021509260317012803 | 2      |            | NCC1=CC(F)=C(F)C=C1 |          | ClCC1=CC(C(O)=O)=CC=C1  |            | NCC1=CC=C(C)C(F)C=C1      |          | ClC(C)=C(C)C([C@H](C)C)C(O)=O |            | NCCCN1C=C1           |                      | OC(C1=CSC(C)C=C1)=O    |
| 1109        | 131024021509260417012803 | 2      |            | NCC1=CC(F)=C(F)C=C1 |          | ClCC1=CC(C(O)=O)=CC=C1  |            | NCC1=CC=C(C)C(F)C=C1      |          | ClC(C)=C(C)C([C@H](C)C)C(O)=O |            | NCCCN1C=C1           |                      | OC(C1=CSC(C)C=C1)=O    |
| 1110        | 131024021509260417022803 | 2      |            | NCC1=CC(F)=C(F)C=C1 |          | ClCC1=CC(C(O)=O)=CC=C1  |            | NCC1=CC=C(C)C(F)C=C1      |          | ClC(C)=C(C)C([C@H](C)C)C(O)=O |            | NCCCN1C=C1           |                      | ClCC1=CC(C(O)=O)=CC=C1 |
| 1112        | 131024031501260317092804 | 2      |            | NCC1=CC(F)=C(F)C=C1 |          | OC(C1=CSC(C)C=C1)=O     |            | NCC1=CC=CS1               |          | OC(C1=CC(C)C=C1)=O            |            | N[C@H](C)C1=CC=CC=C1 |                      | CCC(O)=O               |
| 1113        | 131024031501260417022809 | 2      |            | NCC1=CC(F)=C(F)C=C1 |          | OC(C1=CSC(C)C=C1)=O     |            | NCCN(C)C=O                |          | OC(C1=CC=C(C)C=C1)=O          |            | NCC1C000C1           |                      | ClCC1=CC(C(O)=O)=CC=C1 |
| 1114        | 131024031501260417032809 | 2      |            | NCC1=CC(F)=C(F)C=C1 |          | OC(C1=CSC(C)C=C1)=O     |            | NCCN(C)C=O                |          | OC(C1=CC=C(C)C=C1)=O          |            | NCC1C000C1           |                      | OC([C@H](C)C)=O [S]    |
| 1115        | 131024031501260417102801 | 2      |            | NCC1=CC(F)=C(F)C=C1 |          | OC(C1=CSC(C)C=C1)=O     |            | NCCN(C)C=O                |          | OC(C1=CC=C(C)C=C1)=O          |            | N[C@H](C)C1=CC=CC=C1 |                      | OC(C1=CSC(C)C=C1)=O    |
| 1116        | 131024031501260417102804 | 2      |            | NCC1=CC(F)=C(F)C=C1 |          | OC(C1=CSC(C)C=C1)=O     |            | NCCN(C)C=O                |          | OC(C1=CC=C(C)C=C1)=O          |            | N[C@H](C)C1=CC=CC=C1 |                      | O=C(C)C1=C(C)OC=C1     |
| 1117        | 131024031501260817022802 | 2      |            | NCC1=CC(F)=C(F)C=C1 |          | OC(C1=CSC(C)C=C1)=O     |            | N[C@H](C)C1=CC=CC=C1      |          | OC(C1=CSC(C)C=C1)=O           |            | NCCO                 |                      | ClCC1=CC(C(O)=O)=CC=C1 |
| 1118        | 131024031501261017012803 | 2      |            | NCC1=CC(F)=C(F)C=C1 |          | OC(C1=CSC(C)C=C1)=O     |            | NCC1=CC=C(C)C=C1          |          | ClC(C)=C(C)C([C@H](C)C)C(O)=O |            | NCCCN1C=C1           |                      | OC(C1=CSC(C)C=C1)=O    |
| 1119        | 131024031501261017022803 | 2      |            | NCC1=CC(F)=C(F)C=C1 |          | OC(C1=CSC(C)C=C1)=O     |            | NCC1=CC=C(C)C=C1          |          | ClC(C)=C(C)C([C@H](C)C)C(O)=O |            | NCCCN1C=C1           |                      | ClCC1=CC(C(O)=O)=CC=C1 |
| 1120        | 131024031502260417032810 | 2      |            | NCC1=CC(F)=C(F)C=C1 |          | OC(C1=CSC(C)C=C1)=O     |            | NCCN(C)C=O                |          | OC(C1=CC=C(C)C=C1)=O          |            | NCC1=CC=C(C)C(C)C=C1 |                      | OC([C@H](C)C)=O [S]    |
| 1121        | 131024031502260517092804 | 2      |            | NCC1=CC(F)=C(F)C=C1 |          | OC(C1=CSC(C)C=C1)=O     |            | NCC(C)C(O)                |          | OC(C1=CC=C(C)C=C1)=O          |            | N[C@H](C)C1=CC=CC=C1 |                      | CCC(O)=O               |
| 1122        | 131024031503260217012803 | 2      |            | NCC1=CC(F)=C(F)C=C1 |          | OC(C1=CSC(C)C=C1)=O     |            | NCC1=CC=C(S(=O)(=O)C)C=C1 |          | OC(C1=CC(C)C=C1)=O            |            | NCCCN1C=C1           |                      | OC(C1=CSC(C)C=C1)=O    |
| 1123        | 131024031503260417032801 | 2      |            | NCC1=CC(F)=C(F)C=C1 |          | OC(C1=CSC(C)C=C1)=O     |            | NCCN(C)C=O                |          | OC(C1=CC=C(C)C=C1)=O          |            | NCC1=CNC2=CC=CC=C2   |                      | OC([C@H](C)C)=O [S]    |
| 1124        | 131024031503260517032803 | 2      |            | NCC1=CC(F)=C(F)C=C1 |          | OC(C1=CSC(C)C=C1)=O     |            | NCC1=CC=C(C)C=C1          |          | OC(C1=CC=C(C)C=C1)=O          |            | NCCCN1C=C1           |                      | OC([C@H](C)C)=O [S]    |
| 1125        | 131024031503260517032809 | 2      |            | NCC1=CC(F)=C(F)C=C1 |          | OC(C1=CSC(C)C=C1)=O     |            | NCC1=CC=C(C)C=C1          |          | OC(C1=CC=C(C)C=C1)=O          |            | NCC1C000C1           |                      | OC([C@H](C)C)=O [S]    |
| 1126        | 131024031503260517032808 | 2      |            | NCC1=CC(F)=C(F)C=C1 |          | OC(C1=CSC(C)C=C1)=O     |            | NCC1=CC(F)=CC(C(F)F)C=C1  |          | OC(C1=CSC(C)C=C1)=O           |            | BrC1=CC=C(N)C=C1     |                      | OC([C@H](C)C)=O [S]    |
| 1127        | 131024031504260417022809 | 2      |            | NCC1=CC(F)=C(F)C=C1 |          | OC(C1=CSC(C)C=C1)=O     |            | NCCN(C)C=O                |          | OC(C1=CC=C(C)C=C1)=O          |            | NCC1C000C1           |                      | ClCC1=CC(C(O)=O)=CC=C1 |

| observation | full_mol_code2           | copies | Amines(X1) | Amines(X1)-smiles   | Acid(X1) | Acid(X1)-smiles             | Amines(X2) | Amines(X2)-smiles         | Acid(X2) | Acid(X2)-smiles            | Amines(X3) | Amines(X3)-smiles        | Structure of Pair... | Pair3Acids            |
|-------------|--------------------------|--------|------------|---------------------|----------|-----------------------------|------------|---------------------------|----------|----------------------------|------------|--------------------------|----------------------|-----------------------|
| 1128        | 131024031504260517102804 | 2      |            | NCC1=CC(F)=C(F)C=C1 |          | OC(C1=CSC(C(=O)N1)=O        |            | NCC(C)C(O)                |          | OC(C1=CC=C(C(C)C=C1)=O     |            | N[C@@H](C)C1=CC=CC=C1[S  |                      | O=C(O)C1=C(C)OC=C1    |
| 1129        | 131024031504260817032802 | 2      |            | NCC1=CC(F)=C(F)C=C1 |          | OC(C1=CSC(C(=O)N1)=O        |            | N[C@@H](C)C1=CC=CC=C1     |          | OC(C1=CSC(C(=O)N1)=O       |            | NCCO                     |                      | OC([C@@H](C)C)=O[S    |
| 1130        | 131024031504261017092804 | 2      |            | NCC1=CC(F)=C(F)C=C1 |          | OC(C1=CSC(C(=O)N1)=O        |            | NCC1=CC=C(C)C=C1          |          | ClC(C)=C(C)[C@@H](C)C(O)=O |            | N[C@@H](C)C1=CC=CC=C1[R] |                      | CCC(O)=O              |
| 1131        | 131024031509260317102804 | 2      |            | NCC1=CC(F)=C(F)C=C1 |          | OC(C1=CSC(C(=O)N1)=O        |            | NCC1=CC=C(C)C(F)F=C1      |          | ClC(C)=C(C)[C@@H](C)C(O)=O |            | N[C@@H](C)C1=CC=CC=C1[S  |                      | O=C(O)C1=C(C)OC=C1    |
| 1132        | 131024031509260417022809 | 2      |            | NCC1=CC(F)=C(F)C=C1 |          | OC(C1=CSC(C(=O)N1)=O        |            | NCC1=CC=C(C)C(F)F=C1      |          | ClC(C)=C(C)[C@@H](C)C(O)=O |            | NCC1CCCC1                |                      | ClC1=CC(C(=O)O)=CC=C1 |
| 1133        | 131024031510260317012803 | 2      |            | NCC1=CC(F)=C(F)C=C1 |          | OC(C1=CSC(C(=O)N1)=O        |            | CC(C)CCN                  |          | ClC(C)=C(C)[C@@H](C)C(O)=O |            | NCCCN1C=C=C1             |                      | OC(C1=CSC(C(=O)N1)=O  |
| 1134        | 131024031510260317032803 | 2      |            | NCC1=CC(F)=C(F)C=C1 |          | OC(C1=CSC(C(=O)N1)=O        |            | CC(C)CCN                  |          | ClC(C)=C(C)[C@@H](C)C(O)=O |            | NCCCN1C=C=C1             |                      | OC([C@@H](C)C)=O[S    |
| 1135        | 131024031510260417032804 | 2      |            | NCC1=CC(F)=C(F)C=C1 |          | OC(C1=CSC(C(=O)N1)=O        |            | CC(C)CCN                  |          | ClC(C)=C(C)[C@@H](C)C(O)=O |            | NCC1=CC=C(O)1            |                      | OC([C@@H](C)C)=O[S    |
| 1136        | 131024041501260217032805 | 2      |            | NCC1=CC(F)=C(F)C=C1 |          | ClC(C)C=C(C)[C@@H](C)C(O)=O |            | NCC1=CC=C(S(=O)(=O)C)C=C1 |          | OC(C1=CC=C(C(=O)N1)=O      |            | NCC1COO(C=C=O)C=C2O1     |                      | OC([C@@H](C)C)=O[S    |
| 1137        | 131024041501260417022806 | 2      |            | NCC1=CC(F)=C(F)C=C1 |          | ClC(C)C=C(C)[C@@H](C)C(O)=O |            | NCCN(C)C=O                |          | OC(C1=CC=C(C)C)C=C1=O      |            | N[C@@H](C)C1=CC=CC=C1    |                      | ClC1=CC(C(=O)O)=CC=C1 |
| 1138        | 131024041501260417032806 | 2      |            | NCC1=CC(F)=C(F)C=C1 |          | ClC(C)C=C(C)[C@@H](C)C(O)=O |            | NCCN(C)C=O                |          | OC(C1=CC=C(C)C)C=C1=O      |            | N[C@@H](C)C1=CC=CC=C1    |                      | OC([C@@H](C)C)=O[S    |
| 1139        | 131024041501260417032807 | 2      |            | NCC1=CC(F)=C(F)C=C1 |          | ClC(C)C=C(C)[C@@H](C)C(O)=O |            | NCCN(C)C=O                |          | OC(C1=CC=C(C)C)C=C1=O      |            | NCC1=CC=C(C)C(OC)C=C1    |                      | OC([C@@H](C)C)=O[S    |
| 1140        | 131024041501260817032804 | 2      |            | NCC1=CC(F)=C(F)C=C1 |          | ClC(C)C=C(C)[C@@H](C)C(O)=O |            | NCC1=CC=C(C)C=C1          |          | OC(C1=CC=C(C)C)C=C1=O      |            | NCC1=CC=C(O)1            |                      | OC([C@@H](C)C)=O[S    |
| 1141        | 131024041501260817032807 | 2      |            | NCC1=CC(F)=C(F)C=C1 |          | ClC(C)C=C(C)[C@@H](C)C(O)=O |            | N[C@@H](C)C1=CC=CC=C1     |          | OC(C1=CSC(C(=O)N1)=O       |            | NCC1=CC(C)C(=O)C(OC)C=C1 |                      | OC([C@@H](C)C)=O[S    |
| 1142        | 131024041501260917012803 | 2      |            | NCC1=CC(F)=C(F)C=C1 |          | ClC(C)C=C(C)[C@@H](C)C(O)=O |            | NCC1=CC(F)=CC(C)C(F)F=C1  |          | OC(C1=CSC(C(=O)N1)=O       |            | NCCCN1C=C=C1             |                      | OC(C1=CSC(C(=O)N1)=O  |
| 1143        | 131024041501260917032809 | 2      |            | NCC1=CC(F)=C(F)C=C1 |          | ClC(C)C=C(C)[C@@H](C)C(O)=O |            | NCC1=CC(F)=CC(C)C(F)F=C1  |          | OC(C1=CSC(C(=O)N1)=O       |            | NCC1CCCC1                |                      | OC([C@@H](C)C)=O[S    |
| 1144        | 131024041502260617032808 | 2      |            | NCC1=CC(F)=C(F)C=C1 |          | ClC(C)C=C(C)[C@@H](C)C(O)=O |            | NCC1=CC=C(C)C=C1          |          | ClC(C)=C(C)C(C)C=C1=O      |            | BrC1=CC=C(C)C=C1         |                      | OC([C@@H](C)C)=O[S    |
| 1145        | 131024041502261017092802 | 2      |            | NCC1=CC(F)=C(F)C=C1 |          | ClC(C)C=C(C)[C@@H](C)C(O)=O |            | NCC1=CC=C(C)C=C1          |          | ClC(C)=C(C)[C@@H](C)C(O)=O |            | N[C@@H](C)C1=CC=CC=C1[R] |                      | ClC1=CC(C(=O)O)=CC=C1 |
| 1146        | 131024041503260417032801 | 2      |            | NCC1=CC(F)=C(F)C=C1 |          | ClC(C)C=C(C)[C@@H](C)C(O)=O |            | NCCN(C)C=O                |          | OC(C1=CC=C(C)C)C=C1=O      |            | NCCCN1C=C=C1             |                      | OC([C@@H](C)C)=O[S    |
| 1147        | 131024041504260417032804 | 2      |            | NCC1=CC(F)=C(F)C=C1 |          | ClC(C)C=C(C)[C@@H](C)C(O)=O |            | NCCN(C)C=O                |          | OC(C1=CC=C(C)C)C=C1=O      |            | NCC1=CC=C(O)1            |                      | OC([C@@H](C)C)=O[S    |
| 1148        | 131024041504260417092804 | 2      |            | NCC1=CC(F)=C(F)C=C1 |          | ClC(C)C=C(C)[C@@H](C)C(O)=O |            | NCCN(C)C=O                |          | OC(C1=CC=C(C)C)C=C1=O      |            | N[C@@H](C)C1=CC=CC=C1[R] |                      | CCC(O)=O              |
| 1149        | 131024041504260717032802 | 2      |            | NCC1=CC(F)=C(F)C=C1 |          | ClC(C)C=C(C)[C@@H](C)C(O)=O |            | NCC1=CC=C(N)C(C)C=C1      |          | OC(C1=CSC(C(=O)N1)=O       |            | NCCO                     |                      | OC([C@@H](C)C)=O[S    |
| 1150        | 131024041504260717032805 | 2      |            | NCC1=CC(F)=C(F)C=C1 |          | ClC(C)C=C(C)[C@@H](C)C(O)=O |            | N[C@@H](C)C1=CC=CC=C1     |          | OC(C1=CSC(C(=O)N1)=O       |            | NCC1COO(C=C=O)C=C2O1     |                      | OC([C@@H](C)C)=O[S    |
| 1151        | 131024041509260317032803 | 2      |            | NCC1=CC(F)=C(F)C=C1 |          | ClC(C)C=C(C)[C@@H](C)C(O)=O |            | NCC1=CC=C(C)C(F)F=C1      |          | ClC(C)=C(C)[C@@H](C)C(O)=O |            | NCCCN1C=C=C1             |                      | OC([C@@H](C)C)=O[S    |
| 1152        | 131024041509260317102804 | 2      |            | NCC1=CC(F)=C(F)C=C1 |          | ClC(C)C=C(C)[C@@H](C)C(O)=O |            | NCC1=CC=C(C)C(F)F=C1      |          | ClC(C)=C(C)[C@@H](C)C(O)=O |            | N[C@@H](C)C1=CC=CC=C1[S  |                      | O=C(O)C1=C(C)OC=C1    |
| 1153        | 131024041509260417022806 | 2      |            | NCC1=CC(F)=C(F)C=C1 |          | ClC(C)C=C(C)[C@@H](C)C(O)=O |            | NCC1=CC=C(C)C(F)F=C1      |          | ClC(C)=C(C)[C@@H](C)C(O)=O |            | N[C@@H](C)C1=CC=CC=C1    |                      | ClC1=CC(C(=O)O)=CC=C1 |

## Section 11: Analysis of ring-closure via the Michael (thiol-enone) reaction

Linear analogs of DDD and DDA were synthesized with acrylic acid at the X3 position on 10 & 160  $\mu\text{M}$  beads following general SPS method. Compound DDD and DDA have complete cyclization after 8hrs. Thiol protecting STMP group was removed from the linear precursor and it was suspended in 2x PBST buffer at 37°C for 12 hrs. DMSO solution of BnBr was added to beads suspended in PBST buffer (final conc, 1.0M, 150uL) and incubated for an hour at 37°C. Similarly, 10  $\mu\text{M}$  beads were treated with DMSO solution of mBBr dye (final conc, 1mM, 150ul, PBS). After thiol alkylations, they were washed, 160  $\mu\text{M}$  beads were TFA cleaved and analyzed over LCMS. 10  $\mu\text{M}$  beads were suspended in PBST buffer, transferred to BD FACS tube and their fluorescence was measured.

Incomplete cyclization was observed for both DDD and DDA analogs for thiol-ene based ring closure.

### Analysis of ring-closure via flow-cytometry:

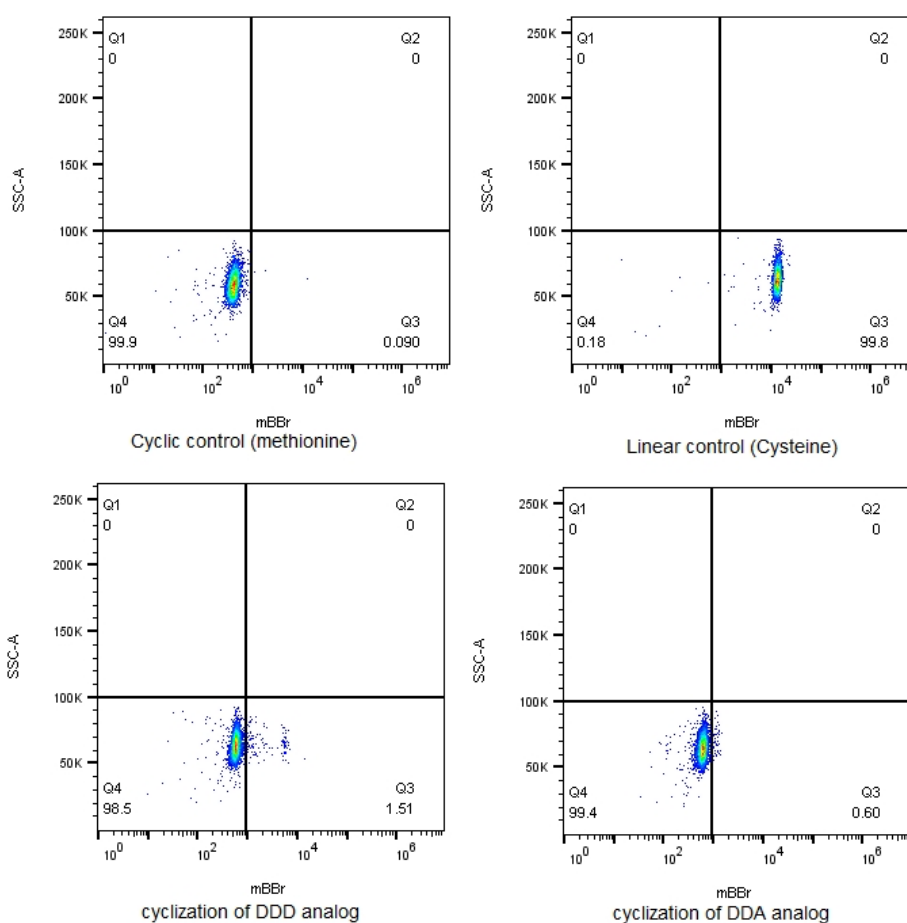

## Cyclization of DDA-analog:

Incomplete cyclization was observed on 160  $\mu\text{M}$  beads but 10  $\mu\text{M}$  beads seems to have completed cyclization. Ring closure via thiol-ene reaction appears to be slower compared to halide displacement based reaction.

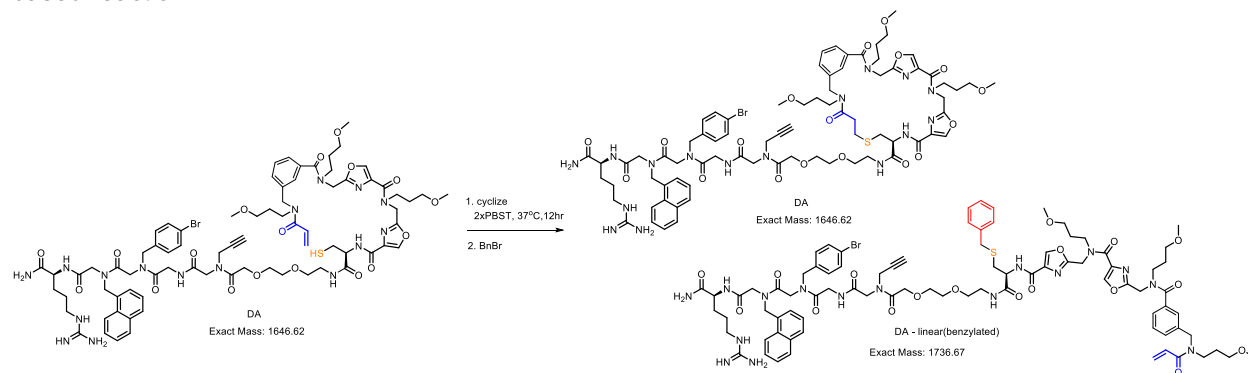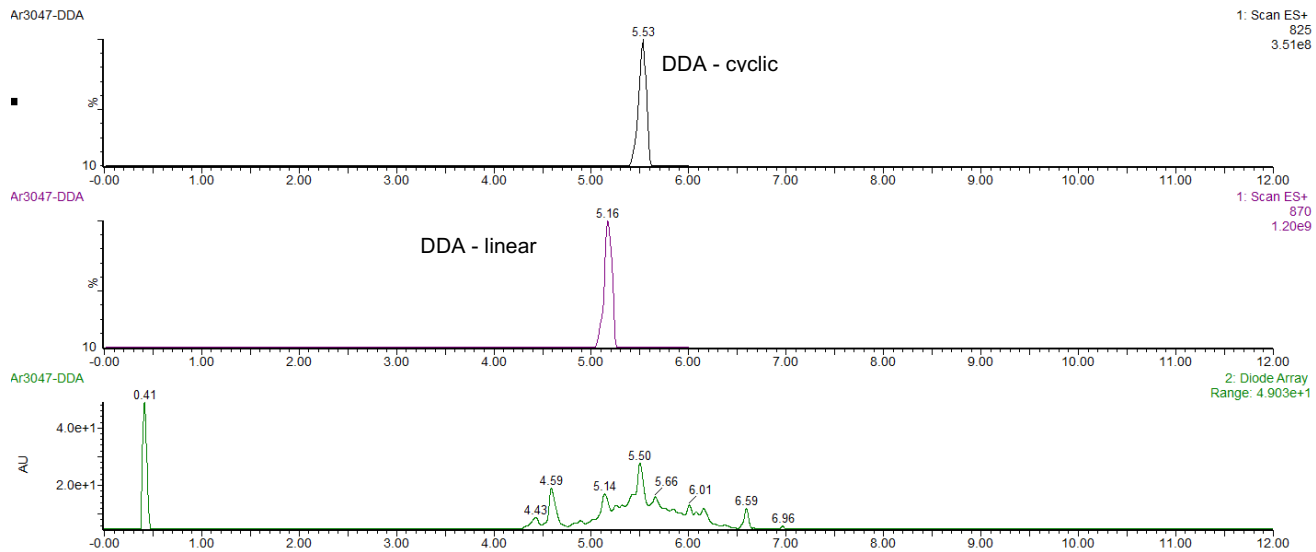

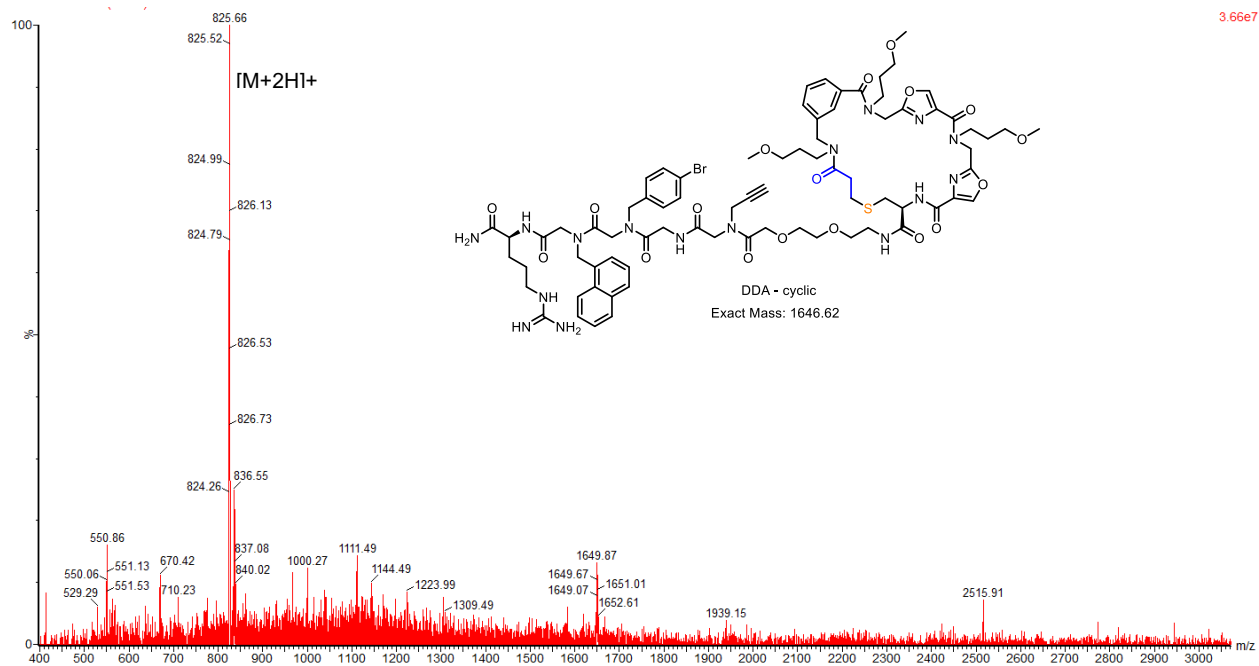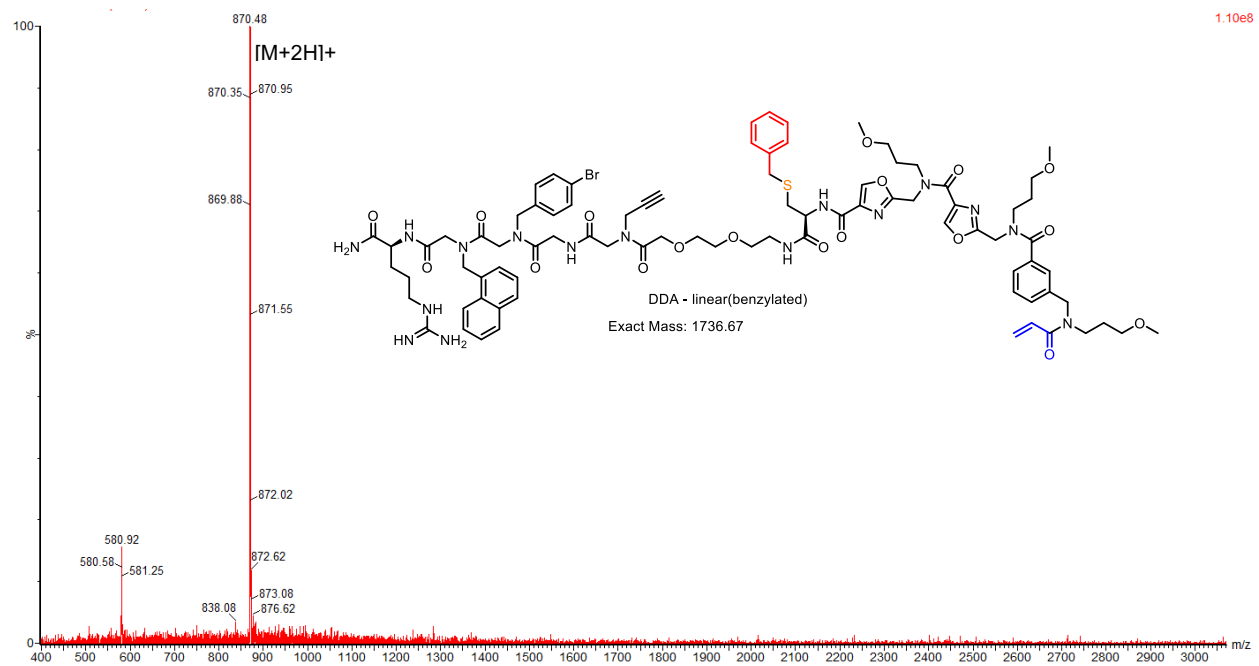

## Cyclization of DDD analog:

Incomplete cyclization was observed on 160  $\mu\text{M}$  beads but 10  $\mu\text{M}$  beads seems to have completed cyclization. Ring closure via thiol-ene reaction appears to be slower compared to halide displacement based reaction.

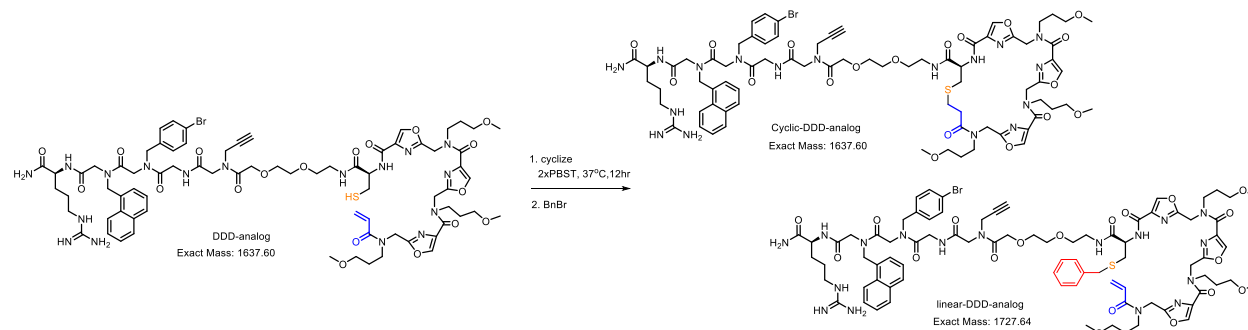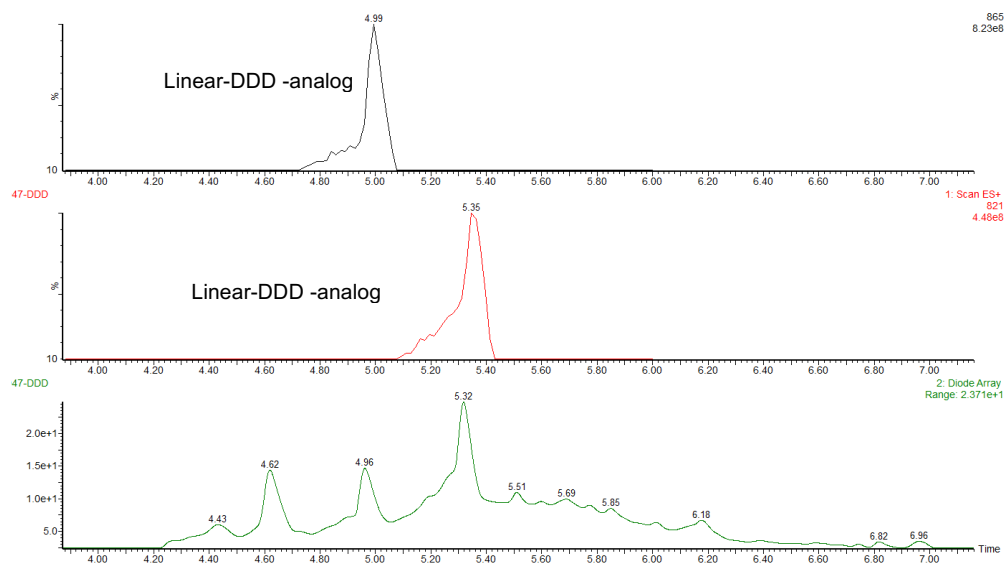

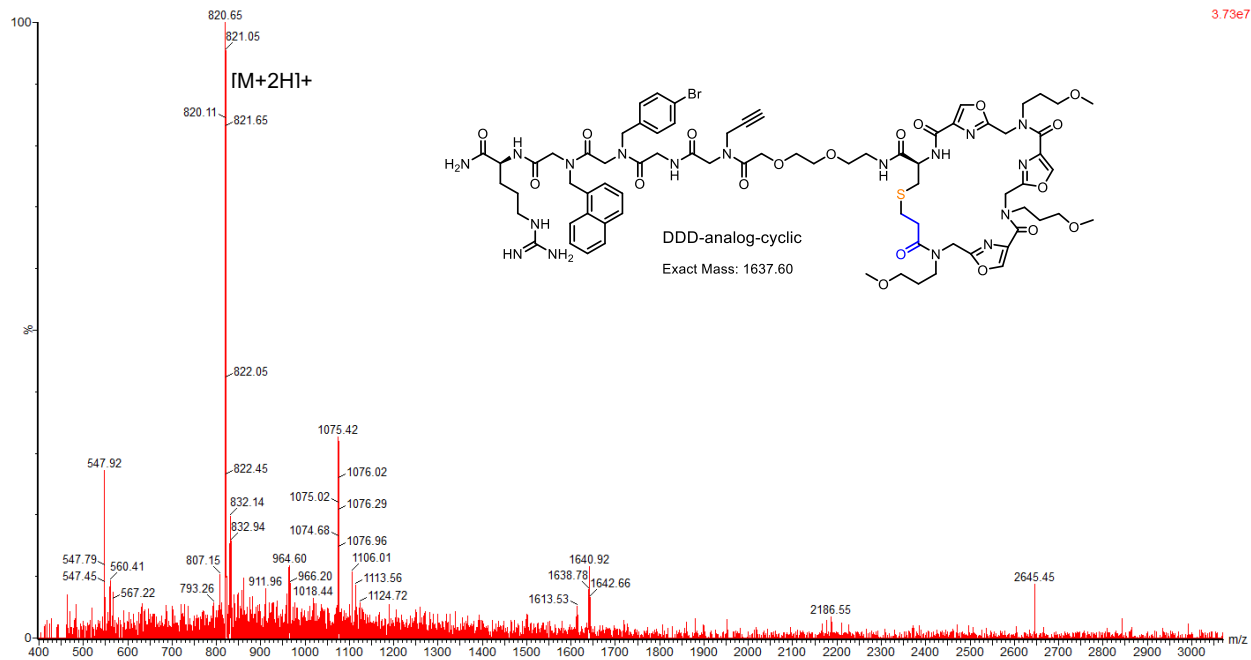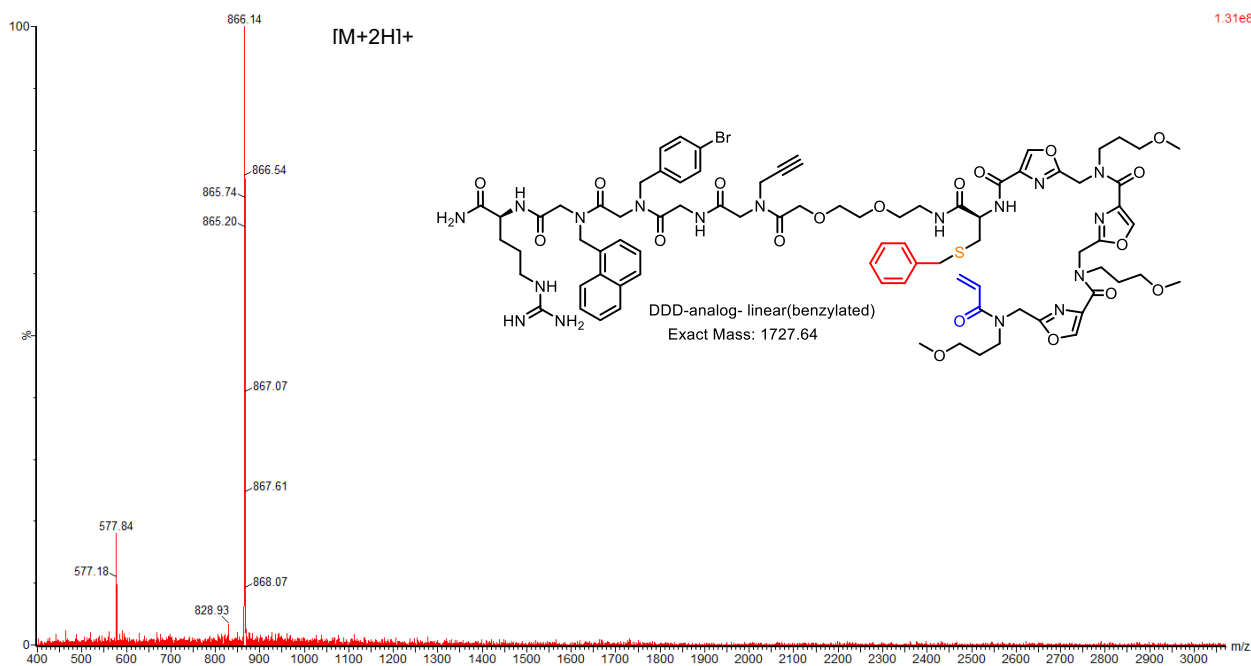

Supplement: NIHMS1683950-supplement-SUP.pdf [file NIHMS1683950-supplement-SUP.pdf]
